# Supplementary material for: In Silico Profiling of Clinical Phenotypes for Human Targets Using Adverse Event Data
Source: High Throughput. 2018 Nov 23;7(4):37. doi: 10.3390/ht7040037 (PMC6306940; doi:10.3390/ht7040037)
Supplement: Supplementary file 1 [file high-throughput-07-00037-s001.zip]

Archive with 9 entries (8 files):
- high-throughput-385126-suppl-final/
- high-throughput-385126-suppl-final/.DS_Store
- high-throughput-385126-suppl-final/Supplementary_File_1.txt
- high-throughput-385126-suppl-final/Supplementary_File_2.txt
- high-throughput-385126-suppl-final/Supplementary_File_3.txt
- high-throughput-385126-suppl-final/Supplementary_File_4.txt
- high-throughput-385126-suppl-final/Supplementary_File_5.xlsx
- high-throughput-385126-suppl-final/Supplementary_File_6_Figures_and_Tables.docx
- high-throughput-385126-suppl-final/Supplementary_File_6_Figures_and_Tables.pdf
