# Supplementary material for: In Silico Profiling of Clinical Phenotypes for Human Targets Using Adverse Event Data
Source: High Throughput. 2018 Nov 23;7(4):37. doi: 10.3390/ht7040037 (PMC6306940; doi:10.3390/ht7040037)
Supplement: Supplementary file 1 [file high-throughput-07-00037-s001.zip › high-throughput-385126-suppl-final/Supplementary_File_1.txt]

SWISSPROT_ID	TARGET_CASE_COUNT	REACTION_NAME	REACTION_CASE_COUNT	NUM_CASES_TARGET_AND_REACTION	PRR	P-value Fisher Exact Test (two tailed)	Q-Value (Based on Fisher Exact Test)
2B11_HUMAN	24286	Abdominal hernias and other abdominal wall conditions	16184	28	0.48291000000000006	2e-05	1.6652132005324277e-05
2B11_HUMAN	24286	Abortions and stillbirth	27420	87	0.8869100000000001	0.28681999999999996	0.14059044088241332
2B11_HUMAN	24286	Acid-base disorders	59306	29	0.13632	0.0	0.0
2B11_HUMAN	24286	Adjustment disorders (incl subtypes)	952	5	1.47118	0.40226	0.18785678905554098
2B11_HUMAN	24286	Administration site reactions	325762	5170	4.49349	0.0	0.0
2B11_HUMAN	24286	Adrenal gland disorders	8941	15	0.46825	0.00133	0.0009530020540369727
2B11_HUMAN	24286	Age related factors	1700	9	1.48301	0.21885	0.11105470017567613
2B11_HUMAN	24286	Allergic conditions	330561	2927	2.4893099999999997	0.0	0.0
2B11_HUMAN	24286	Anaemias nonhaemolytic and marrow depression	127438	83	0.1816	0.0	0.0
2B11_HUMAN	24286	Anal and rectal conditions NEC	13492	4	0.08263	0.0	0.0
2B11_HUMAN	24286	Ancillary infectious topics	26835	39	0.40555	0.0	0.0
2B11_HUMAN	24286	Aneurysms and artery dissections	10593	28	0.73847	0.12082999999999999	0.06540160172824329
2B11_HUMAN	24286	Angioedema and urticaria	115947	1321	3.21118	0.0	0.0
2B11_HUMAN	24286	Anterior eye structural change, deposit and degeneration	28519	48	0.46976999999999997	0.0	0.0
2B11_HUMAN	24286	Anxiety disorders and symptoms	214467	722	0.94121	0.10184	0.05596757149781872
2B11_HUMAN	24286	Appetite and general nutritional disorders	157395	206	0.36517	0.0	0.0
2B11_HUMAN	24286	Arteriosclerosis, stenosis, vascular insufficiency and necrosis	300539	453	0.42063	0.0	0.0
2B11_HUMAN	24286	Aural disorders NEC	22997	69	0.83855	0.15016	0.0793608484106867
2B11_HUMAN	24286	Autoimmune disorders	73876	148	0.55934	0.0	0.0
2B11_HUMAN	24286	Bacterial infectious disorders	115621	288	0.6958	0.0	0.0
2B11_HUMAN	24286	Benign neoplasms gastrointestinal	7492	10	0.37242	0.00043	0.00032340746637477815
2B11_HUMAN	24286	Bile duct disorders	9028	9	0.27805	0.0	0.0
2B11_HUMAN	24286	Bladder and bladder neck disorders (excl calculi)	39461	204	1.44797	0.0	0.0
2B11_HUMAN	24286	Blood and lymphatic system disorders congenital	3344	6	0.50085	0.10757	0.05879877901791095
2B11_HUMAN	24286	Body temperature conditions	172155	455	0.73839	0.0	0.0
2B11_HUMAN	24286	Bone and joint injuries	123309	366	0.8295100000000001	0.00022999999999999998	0.00017727037109424788
2B11_HUMAN	24286	Bone and joint therapeutic procedures	30966	76	0.68555	0.00058	0.00043069894629976834
2B11_HUMAN	24286	Bone disorders (excl congenital and fractures)	104336	196	0.5244300000000001	0.0	0.0
2B11_HUMAN	24286	Bone, calcium, magnesium and phosphorus metabolism disorders	43097	53	0.34309	0.0	0.0
2B11_HUMAN	24286	Breast disorders	78951	212	0.7502300000000001	1e-05	8.460741970690573e-06
2B11_HUMAN	24286	Breast neoplasms benign (incl nipple)	2309	4	0.48353999999999997	0.16197999999999999	0.08496027711756099
2B11_HUMAN	24286	Breast neoplasms malignant and unspecified (incl nipple)	49167	175	0.99531	1.0	0.39291113796942484
2B11_HUMAN	24286	Breast therapeutic procedures	2104	11	1.46443	0.19729000000000002	0.10131240941208444
2B11_HUMAN	24286	Bronchial disorders (excl neoplasms)	80293	148	0.51455	0.0	0.0
2B11_HUMAN	24286	Cardiac and vascular disorders congenital	14353	24	0.4667	2.9999999999999997e-05	2.4708510406450908e-05
2B11_HUMAN	24286	Cardiac and vascular investigations (excl enzyme tests)	186678	511	0.76483	0.0	0.0
2B11_HUMAN	24286	Cardiac arrhythmias	218674	261	0.33297	0.0	0.0
2B11_HUMAN	24286	Cardiac disorder signs and symptoms	542853	2216	1.14211	0.0	0.0
2B11_HUMAN	24286	Cardiac neoplasms	331	1	0.8443700000000001	1.0	0.39291113796942484
2B11_HUMAN	24286	Cardiac therapeutic procedures	10242	13	0.35412	1e-05	8.460741970690573e-06
2B11_HUMAN	24286	Cardiac valve disorders	19057	49	0.7183	0.01768	0.01104847733223095
2B11_HUMAN	24286	Central nervous system infections and inflammations	19686	112	1.59435	0.0	0.0
2B11_HUMAN	24286	Central nervous system vascular disorders	172365	226	0.36583000000000004	0.0	0.0
2B11_HUMAN	24286	Cervix disorders (excl infections and inflammations)	4159	22	1.4817799999999999	0.06822	0.03881144857175116
2B11_HUMAN	24286	Changes in physical activity	34687	50	0.40223000000000003	0.0	0.0
2B11_HUMAN	24286	Chemical injury and poisoning	123001	137	0.3107	0.0	0.0
2B11_HUMAN	24286	Chromosomal abnormalities and abnormal gene carriers	2430	24	2.77946	1e-05	8.460741970690573e-06
2B11_HUMAN	24286	Coagulopathies and bleeding diatheses (excl thrombocytopenic)	42323	65	0.4286	0.0	0.0
2B11_HUMAN	24286	Cognitive and attention disorders and disturbances	66027	332	1.40816	0.0	0.0
2B11_HUMAN	24286	Communication disorders and disturbances	72637	313	1.20589	0.00115	0.000829562174414443
2B11_HUMAN	24286	Congenital and hereditary disorders NEC	10074	14	0.38777	5e-05	4.057040105205715e-05
2B11_HUMAN	24286	Congenital and peripartum neurological conditions	4994	20	1.12039	0.5533	0.24617529040106742
2B11_HUMAN	24286	Congenital cardiac disorders	6451	29	1.25827	0.20958000000000002	0.10678860706159941
2B11_HUMAN	24286	Congenital ear disorders (excl deafness)	1075	1	0.25944	0.19794	0.10157431159440788
2B11_HUMAN	24286	Congenital eye disorders (excl glaucoma)	886	7	2.2189900000000002	0.04241	0.02498124419563707
2B11_HUMAN	24286	Congenital reproductive tract and breast disorders	1844	4	0.60574	0.4322	0.1999599065506371
2B11_HUMAN	24286	Congenital respiratory tract disorders	1190	2	0.46908999999999995	0.45819	0.2101225762087987
2B11_HUMAN	24286	Connective tissue disorders (excl congenital)	21636	47	0.60661	0.00025	0.000191936548781933
2B11_HUMAN	24286	Cornification and dystrophic skin disorders	9417	23	0.6822199999999999	0.06894	0.03917830827067669
2B11_HUMAN	24286	Coronary artery disorders	278562	1024	1.02807	0.3641	0.17278857071100806
2B11_HUMAN	24286	Cranial nerve disorders (excl neoplasms)	52382	293	1.56735	0.0	0.0
2B11_HUMAN	24286	Cutaneous neoplasms benign	5790	16	0.77213	0.37646999999999997	0.17793831586736633
2B11_HUMAN	24286	Cytogenetic investigations	573	2	0.97598	1.0	0.39291113796942484
2B11_HUMAN	24286	Decreased and nonspecific blood pressure disorders and shock	378305	1455	1.07582	0.00464	0.0031263315851248756
2B11_HUMAN	24286	Deliria (incl confusion)	90586	207	0.6381899999999999	0.0	0.0
2B11_HUMAN	24286	Dementia and amnestic conditions	87697	483	1.54314	0.0	0.0
2B11_HUMAN	24286	Demyelinating disorders	52603	3111	17.51502	0.0	0.0
2B11_HUMAN	24286	Dental and gingival conditions	47772	95	0.55521	0.0	0.0
2B11_HUMAN	24286	Depressed mood disorders and disturbances	141290	596	1.18036	7e-05	5.618385189904781e-05
2B11_HUMAN	24286	Developmental disorders NEC	2757	9	0.91258	1.0	0.39291113796942484
2B11_HUMAN	24286	Diabetic complications	17966	9	0.13965	0.0	0.0
2B11_HUMAN	24286	Dissociative disorders	2897	6	0.57829	0.21168	0.10774483846166796
2B11_HUMAN	24286	Disturbances in thinking and perception	62652	144	0.6419100000000001	0.0	0.0
2B11_HUMAN	24286	Diverticular disorders	15412	25	0.45271999999999996	1e-05	8.460741970690573e-06
2B11_HUMAN	24286	Ear and labyrinthine disorders congenital	1154	1	0.24166999999999997	0.20623000000000002	0.10528927578326411
2B11_HUMAN	24286	Eating disorders and disturbances	34169	44	0.35927	0.0	0.0
2B11_HUMAN	24286	Economic and housing issues	11788	10	0.23658	0.0	0.0
2B11_HUMAN	24286	Electrolyte and fluid balance conditions	261572	488	0.52082	0.0	0.0
2B11_HUMAN	24286	Embolism and thrombosis	148186	251	0.47276999999999997	0.0	0.0
2B11_HUMAN	24286	Encephalopathies	21467	17	0.22083000000000003	0.0	0.0
2B11_HUMAN	24286	Endocardial disorders	3205	4	0.34819	0.02461	0.015034499248991359
2B11_HUMAN	24286	Endocrine and glandular disorders NEC	616	2	0.9076299999999999	1.0	0.39291113796942484
2B11_HUMAN	24286	Endocrine disorders congenital	383	3	2.1998	0.15893	0.08354701310443556
2B11_HUMAN	24286	Endocrine disorders of gonadal function	47601	34	0.19917	0.0	0.0
2B11_HUMAN	24286	Endocrine gland therapeutic procedures	1573	4	0.71037	0.6715	0.2901345750762195
2B11_HUMAN	24286	Endocrine investigations (incl sex hormones)	25080	39	0.43396999999999997	0.0	0.0
2B11_HUMAN	24286	Endocrine neoplasms benign	2304	10	1.21465	0.48303	0.2198256931830726
2B11_HUMAN	24286	Endocrine neoplasms malignant and unspecified	9017	51	1.5849600000000001	0.0019	0.0013391094879166992
2B11_HUMAN	24286	Environmental issues	573	1	0.48713999999999996	0.72901	0.31045420551100933
2B11_HUMAN	24286	Enzyme investigations NEC	43698	39	0.24891	0.0	0.0
2B11_HUMAN	24286	Epidermal and dermal conditions	666415	2904	1.21953	0.0	0.0
2B11_HUMAN	24286	Exocrine pancreas conditions	41247	68	0.46013000000000004	0.0	0.0
2B11_HUMAN	24286	External ear disorders (excl congenital)	2702	7	0.7237399999999999	0.5169100000000001	0.2327487129843374
2B11_HUMAN	24286	Eye disorders NEC	66383	217	0.91384	0.19118	0.09857160073445395
2B11_HUMAN	24286	Eye disorders congenital	1921	5	0.72714	0.69902	0.2998497063079935
2B11_HUMAN	24286	Eye therapeutic procedures	5660	7	0.34504	0.00116	0.0008362569845723415
2B11_HUMAN	24286	Family issues	5040	11	0.60948	0.12255	0.06623179640575841
2B11_HUMAN	24286	Fatal outcomes	307071	480	0.43623999999999996	0.0	0.0
2B11_HUMAN	24286	Female reproductive tract infections and inflammations	8399	25	0.83186	0.40998999999999997	0.19098291809829024
2B11_HUMAN	24286	Foetal and neonatal investigations	1607	5	0.86967	1.0	0.39291113796942484
2B11_HUMAN	24286	Foetal complications	14238	19	0.37233	0.0	0.0
2B11_HUMAN	24286	Food intolerance syndromes	8964	18	0.56065	0.00997	0.006455400803820646
2B11_HUMAN	24286	Fractures	96081	278	0.8085600000000001	0.00026000000000000003	0.00019935245534393416
2B11_HUMAN	24286	Fungal infectious disorders	46404	69	0.41494	0.0	0.0
2B11_HUMAN	24286	Gallbladder disorders	36730	65	0.49398000000000003	0.0	0.0
2B11_HUMAN	24286	Gastrointestinal conditions NEC	58886	127	0.60225	0.0	0.0
2B11_HUMAN	24286	Gastrointestinal haemorrhages NEC	104328	73	0.19510999999999998	0.0	0.0
2B11_HUMAN	24286	Gastrointestinal infections	49172	92	0.52231	0.0	0.0
2B11_HUMAN	24286	Gastrointestinal inflammatory conditions	71493	91	0.35512	0.0	0.0
2B11_HUMAN	24286	Gastrointestinal investigations	10977	17	0.4322	0.00011	8.703807097742262e-05
2B11_HUMAN	24286	Gastrointestinal motility and defaecation conditions	305542	648	0.5922	0.0	0.0
2B11_HUMAN	24286	Gastrointestinal neoplasms benign	8328	14	0.46921	0.00227	0.0015853957155837555
2B11_HUMAN	24286	Gastrointestinal neoplasms malignant and unspecified	30233	103	0.9525399999999999	0.66384	0.2875811394291391
2B11_HUMAN	24286	Gastrointestinal signs and symptoms	677692	1715	0.7069300000000001	0.0	0.0
2B11_HUMAN	24286	Gastrointestinal stenosis and obstruction	31359	44	0.39150999999999997	0.0	0.0
2B11_HUMAN	24286	Gastrointestinal therapeutic procedures	16874	55	0.9111899999999999	0.56067	0.24881601827976454
2B11_HUMAN	24286	Gastrointestinal tract disorders congenital	5083	12	0.65938	0.15869	0.08343293799851605
2B11_HUMAN	24286	Gastrointestinal ulceration and perforation	41810	46	0.3069	0.0	0.0
2B11_HUMAN	24286	Gastrointestinal vascular conditions	17715	16	0.25189	0.0	0.0
2B11_HUMAN	24286	General system disorders NEC	1483087	6292	1.18717	0.0	0.0
2B11_HUMAN	24286	Genitourinary tract disorders NEC	66124	434	1.8409200000000001	0.0	0.0
2B11_HUMAN	24286	Glaucoma and ocular hypertension	9263	15	0.45195	0.00064	0.0004736253783830093
2B11_HUMAN	24286	Glucose metabolism disorders (incl diabetes mellitus)	103625	121	0.32574000000000003	0.0	0.0
2B11_HUMAN	24286	Gonadotrophin and sex hormone changes	291	1	0.96083	1.0	0.39291113796942484
2B11_HUMAN	24286	Haematological and lymphoid tissue therapeutic procedures	24446	11	0.12544	0.0	0.0
2B11_HUMAN	24286	Haematological disorders NEC	10574	5	0.13182	0.0	0.0
2B11_HUMAN	24286	Haematology investigations (incl blood groups)	191896	264	0.38387	0.0	0.0
2B11_HUMAN	24286	Haematopoietic neoplasms (excl leukaemias and lymphomas)	7665	9	0.32756	8e-05	6.395487197567318e-05
2B11_HUMAN	24286	Haemoglobinopathies	2301	3	0.36376	0.07716	0.04341662117226661
2B11_HUMAN	24286	Haemolyses and related conditions	29699	44	0.41343	0.0	0.0
2B11_HUMAN	24286	Head and neck therapeutic procedures	13635	13	0.26592	0.0	0.0
2B11_HUMAN	24286	Headaches	258675	907	0.98045	0.55672	0.2473692915160244
2B11_HUMAN	24286	Hearing disorders	28721	74	0.71978	0.00343	0.002348091568483897
2B11_HUMAN	24286	Heart failures	230830	345	0.41708	0.0	0.0
2B11_HUMAN	24286	Helminthic disorders	741	1	0.37654	0.53208	0.23850302455224767
2B11_HUMAN	24286	Hepatic and biliary neoplasms benign	3244	6	0.51632	0.10528	0.057668335517535016
2B11_HUMAN	24286	Hepatic and hepatobiliary disorders	160023	280	0.48841	0.0	0.0
2B11_HUMAN	24286	Hepatobiliary investigations	97697	256	0.73206	0.0	0.0
2B11_HUMAN	24286	Hepatobiliary neoplasms	12957	31	0.6682600000000001	0.022080000000000002	0.013598071634696996
2B11_HUMAN	24286	Hepatobiliary neoplasms malignant and unspecified	5969	15	0.70199	0.19229000000000002	0.09908871036469312
2B11_HUMAN	24286	Hepatobiliary therapeutic procedures	11256	40	0.9937299999999999	1.0	0.39291113796942484
2B11_HUMAN	24286	Hypothalamus and pituitary gland disorders	15821	11	0.19387000000000001	0.0	0.0
2B11_HUMAN	24286	Immune disorders NEC	75386	138	0.5110100000000001	0.0	0.0
2B11_HUMAN	24286	Immune system disorders congenital	214	2	2.62869	0.17862999999999998	0.09282643894166312
2B11_HUMAN	24286	Immunodeficiency syndromes	11416	61	1.49688	0.0027600000000000003	0.0019117485337243403
2B11_HUMAN	24286	Immunology and allergy investigations	18435	36	0.5452	7e-05	5.618385189904781e-05
2B11_HUMAN	24286	Impulse control disorders NEC	5185	2	0.10752	0.0	0.0
2B11_HUMAN	24286	Inborn errors of metabolism	1799	2	0.31012	0.10774	0.058884605187042034
2B11_HUMAN	24286	Increased intracranial pressure and hydrocephalus	13127	30	0.63826	0.010320000000000001	0.006669735426360457
2B11_HUMAN	24286	Infections - pathogen unspecified	549473	1406	0.71482	0.0	0.0
2B11_HUMAN	24286	Infections and infestations congenital	176	2	3.20277	0.13144	0.07059343782753127
2B11_HUMAN	24286	Injuries NEC	358480	1541	1.20297	0.0	0.0
2B11_HUMAN	24286	Injuries by physical agents	19040	81	1.19046	0.12794	0.0688739464875003
2B11_HUMAN	24286	Inner ear and VIIIth cranial nerve disorders	43066	168	1.09123	0.25667	0.12781079255973296
2B11_HUMAN	24286	Investigations, imaging and histopathology procedures NEC	28460	209	2.0613799999999998	0.0	0.0
2B11_HUMAN	24286	Iron and trace metal metabolism disorders	6559	9	0.38287	0.00122	0.0008775934268130195
2B11_HUMAN	24286	Joint disorders	266568	508	0.5320199999999999	0.0	0.0
2B11_HUMAN	24286	Legal issues	6758	9	0.37158	0.0007099999999999999	0.0005234932609296503
2B11_HUMAN	24286	Leukaemias	24571	71	0.8074899999999999	0.07689	0.043276778345237576
2B11_HUMAN	24286	Lifestyle issues	87109	294	0.9436200000000001	0.3314	0.15950447343005422
2B11_HUMAN	24286	Lipid analyses	35100	28	0.22246	0.0	0.0
2B11_HUMAN	24286	Lipid metabolism disorders	26032	196	2.11386	0.0	0.0
2B11_HUMAN	24286	Lower respiratory tract disorders (excl obstruction and infection)	95545	93	0.27148	0.0	0.0
2B11_HUMAN	24286	Lymphatic vessel disorders	3609	16	1.24082	0.39932	0.18670586537172787
2B11_HUMAN	24286	Lymphomas Hodgkin's disease	1741	5	0.8025399999999999	0.83975	0.3477932245337814
2B11_HUMAN	24286	Lymphomas NEC	6822	58	2.3893	0.0	0.0
2B11_HUMAN	24286	Lymphomas non-Hodgkin's B-cell	4770	23	1.35006	0.14479	0.07688339675663017
2B11_HUMAN	24286	Lymphomas non-Hodgkin's T-cell	1988	12	1.69215	0.08516	0.04752682455589808
2B11_HUMAN	24286	Lymphomas non-Hodgkin's unspecified histology	2851	14	1.37504	0.20944000000000002	0.10672026966292136
2B11_HUMAN	24286	Malabsorption conditions	9598	12	0.34881	2e-05	1.6652132005324277e-05
2B11_HUMAN	24286	Male genital tract therapeutic procedures	1263	2	0.44193999999999994	0.34191	0.16371939688623513
2B11_HUMAN	24286	Male reproductive tract infections and inflammations	3281	6	0.51049	0.10569	0.05787124875486734
2B11_HUMAN	24286	Malignant and unspecified neoplasms gastrointestinal NEC	32935	109	0.92524	0.45882	0.21035724612040643
2B11_HUMAN	24286	Manic and bipolar mood disorders and disturbances	15716	34	0.60412	0.00202	0.001418998567168803
2B11_HUMAN	24286	Maternal complications of labour and delivery	9293	18	0.54076	0.00528	0.003536036268856187
2B11_HUMAN	24286	Maternal complications of pregnancy	11186	31	0.77435	0.17687	0.09198667974036102
2B11_HUMAN	24286	Medication errors	467421	917	0.54772	0.0	0.0
2B11_HUMAN	24286	Menopause and related conditions	26771	114	1.1916200000000001	0.06457	0.036879484386118475
2B11_HUMAN	24286	Menstrual cycle and uterine bleeding disorders	63922	61	0.26616	0.0	0.0
2B11_HUMAN	24286	Mental impairment disorders	130571	684	1.46736	0.0	0.0
2B11_HUMAN	24286	Mesotheliomas	357	2	1.56981	0.36506	0.17316623171503434
2B11_HUMAN	24286	Metabolic and nutritional disorders congenital	2184	2	0.2554	0.029889999999999996	0.01802505934057166
2B11_HUMAN	24286	Metabolic, nutritional and blood gas investigations	148134	149	0.28055	0.0	0.0
2B11_HUMAN	24286	Metabolism disorders NEC	35688	52	0.40659	0.0	0.0
2B11_HUMAN	24286	Metastases	22915	47	0.57268	4e-05	3.2663203478793225e-05
2B11_HUMAN	24286	Microbiology and serology investigations	19878	48	0.67447	0.00505	0.003387431960714708
2B11_HUMAN	24286	Middle ear disorders (excl congenital)	4329	11	0.7098300000000001	0.30716	0.14919143603804302
2B11_HUMAN	24286	Miscellaneous and site unspecified neoplasms benign	11196	32	0.79869	0.23378000000000002	0.11776512340879303
2B11_HUMAN	24286	Miscellaneous and site unspecified neoplasms malignant and unspecified	62091	83	0.37296999999999997	0.0	0.0
2B11_HUMAN	24286	Mood disorders and disturbances NEC	137071	291	0.5928100000000001	0.0	0.0
2B11_HUMAN	24286	Movement disorders (incl parkinsonism)	180506	922	1.4305700000000001	0.0	0.0
2B11_HUMAN	24286	Muscle disorders	305176	1725	1.58397	0.0	0.0
2B11_HUMAN	24286	Musculoskeletal and connective tissue deformities (incl intervertebral disc disorders)	36240	114	0.87929	0.18532	0.09589363486476156
2B11_HUMAN	24286	Musculoskeletal and connective tissue disorders NEC	339812	1543	1.27101	0.0	0.0
2B11_HUMAN	24286	Musculoskeletal and connective tissue disorders congenital	9356	22	0.65675	0.04582	0.026829399612653324
2B11_HUMAN	24286	Musculoskeletal and connective tissue neoplasms	12171	51	1.1725	0.25356	0.12654212313126922
2B11_HUMAN	24286	Musculoskeletal and soft tissue investigations (excl enzyme tests)	9375	7	0.20820999999999998	0.0	0.0
2B11_HUMAN	24286	Mycobacterial infectious disorders	12129	16	0.36806	0.0	0.0
2B11_HUMAN	24286	Myocardial disorders	41763	76	0.5079899999999999	0.0	0.0
2B11_HUMAN	24286	Neonatal and perinatal conditions	30239	48	0.44301	0.0	0.0
2B11_HUMAN	24286	Neonatal respiratory disorders	5798	11	0.52964	0.02737	0.016597971436976812
2B11_HUMAN	24286	Neoplasm related morbidities	10712	6	0.15616	0.0	0.0
2B11_HUMAN	24286	Neoplastic and ectopic endocrinopathies	2311	5	0.60417	0.3785	0.1787645802957717
2B11_HUMAN	24286	Nephropathies	22120	31	0.39105	0.0	0.0
2B11_HUMAN	24286	Nervous system neoplasms benign	2453	12	1.36981	0.3048	0.14826031694956157
2B11_HUMAN	24286	Nervous system neoplasms malignant and unspecified NEC	8242	54	1.8376400000000002	4e-05	3.2663203478793225e-05
2B11_HUMAN	24286	Nervous system, skull and spine therapeutic procedures	6643	35	1.47585	0.02978	0.01796206816292602
2B11_HUMAN	24286	Neurological disorders NEC	938369	4731	1.41195	0.0	0.0
2B11_HUMAN	24286	Neurological disorders congenital	5222	20	1.0712899999999999	0.7270300000000001	0.3100069341281333
2B11_HUMAN	24286	Neurological disorders of the eye	119728	553	1.29296	0.0	0.0
2B11_HUMAN	24286	Neurological, special senses and psychiatric investigations	14203	41	0.80669	0.1811	0.0939356178014663
2B11_HUMAN	24286	Neuromuscular disorders	109514	776	1.9885	0.0	0.0
2B11_HUMAN	24286	Obstetric and gynaecological therapeutic procedures	21059	89	1.1826	0.1181	0.06403016300936691
2B11_HUMAN	24286	Ocular haemorrhages and vascular disorders NEC	10897	24	0.61505	0.01269	0.00810089315249752
2B11_HUMAN	24286	Ocular infections, irritations and inflammations	73378	290	1.1056	0.08722	0.04860202251056719
2B11_HUMAN	24286	Ocular injuries	3510	8	0.63653	0.25511999999999996	0.12722335605893992
2B11_HUMAN	24286	Ocular neuromuscular disorders	27471	79	0.80362	0.05401	0.031237371032125597
2B11_HUMAN	24286	Ocular sensory symptoms NEC	13075	54	1.15557	0.27148	0.13417999117209511
2B11_HUMAN	24286	Ocular structural change, deposit and degeneration NEC	23238	43	0.51656	0.0	0.0
2B11_HUMAN	24286	Oral soft tissue conditions	152627	380	0.69547	0.0	0.0
2B11_HUMAN	24286	Ovarian and fallopian tube disorders	13507	44	0.91066	0.61301	0.26838384194317605
2B11_HUMAN	24286	Parathyroid gland disorders	8837	9	0.28407	0.0	0.0
2B11_HUMAN	24286	Penile and scrotal disorders (excl infections and inflammations)	7478	5	0.18642999999999998	0.0	0.0
2B11_HUMAN	24286	Pericardial disorders	14148	13	0.25627	0.0	0.0
2B11_HUMAN	24286	Peripheral neuropathies	53974	172	0.89079	0.13756	0.07351035486398745
2B11_HUMAN	24286	Peritoneal and retroperitoneal conditions	33282	15	0.12564	0.0	0.0
2B11_HUMAN	24286	Personality disorders and disturbances in behaviour	71406	120	0.46905	0.0	0.0
2B11_HUMAN	24286	Physical examination topics	207297	477	0.64265	0.0	0.0
2B11_HUMAN	24286	Pigmentation disorders	7098	10	0.39311999999999997	0.0009400000000000001	0.0006848802274954614
2B11_HUMAN	24286	Placental, amniotic and cavity disorders (excl haemorrhages)	4396	7	0.4444	0.022269999999999998	0.013706056781478163
2B11_HUMAN	24286	Plasma cell neoplasms	16095	8	0.13857	0.0	0.0
2B11_HUMAN	24286	Platelet disorders	51325	48	0.26083	0.0	0.0
2B11_HUMAN	24286	Pleural disorders	38350	43	0.31278	0.0	0.0
2B11_HUMAN	24286	Postpartum and puerperal disorders	2081	1	0.13396	0.00911	0.005926658872303952
2B11_HUMAN	24286	Pregnancy, labour, delivery and postpartum conditions	62379	197	0.88277	0.07973	0.04473920575115846
2B11_HUMAN	24286	Procedural and device related injuries and complications NEC	236255	295	0.34836	0.0	0.0
2B11_HUMAN	24286	Product quality issues	147837	160	0.30189	0.0	0.0
2B11_HUMAN	24286	Prostatic disorders (excl infections and inflammations)	14623	33	0.6302399999999999	0.00545	0.003643241450471698
2B11_HUMAN	24286	Protein and amino acid metabolism disorders NEC	7094	1	0.03928	0.0	0.0
2B11_HUMAN	24286	Protein and chemistry analyses NEC	21380	19	0.24784	0.0	0.0
2B11_HUMAN	24286	Protozoal infectious disorders	2491	5	0.56042	0.23811	0.11968841166038571
2B11_HUMAN	24286	Psychiatric and behavioural symptoms NEC	45982	259	1.57838	0.0	0.0
2B11_HUMAN	24286	Psychiatric disorders NEC	182062	149	0.22823000000000002	0.0	0.0
2B11_HUMAN	24286	Psychiatric therapeutic procedures	163	1	1.7200099999999998	0.4423	0.2040311768894314
2B11_HUMAN	24286	Pulmonary vascular disorders	69879	103	0.41131999999999996	0.0	0.0
2B11_HUMAN	24286	Purine and pyrimidine metabolism disorders	9204	13	0.39411999999999997	0.00015	0.00011729257190151044
2B11_HUMAN	24286	Red blood cell disorders	2744	7	0.7126399999999999	0.5189	0.23355083467317733
2B11_HUMAN	24286	Renal and urinary tract disorders congenital	2883	6	0.58111	0.21147	0.1076488227865862
2B11_HUMAN	24286	Renal and urinary tract investigations and urinalyses	62571	52	0.23176	0.0	0.0
2B11_HUMAN	24286	Renal and urinary tract neoplasms benign	4296	7	0.45477	0.02877	0.017393708922691337
2B11_HUMAN	24286	Renal and urinary tract neoplasms malignant and unspecified	22349	31	0.38704	0.0	0.0
2B11_HUMAN	24286	Renal and urinary tract therapeutic procedures	4374	17	1.0871899999999999	0.7026100000000001	0.3011588903853879
2B11_HUMAN	24286	Renal disorders (excl nephropathies)	225563	265	0.32774000000000003	0.0	0.0
2B11_HUMAN	24286	Reproductive neoplasms female benign	11166	41	1.0269	0.81196	0.3380278336225019
2B11_HUMAN	24286	Reproductive neoplasms female malignant and unspecified	9156	55	1.6839099999999998	0.0003	0.00022876503871602363
2B11_HUMAN	24286	Reproductive neoplasms male malignant and unspecified	9477	36	1.0625	0.66688	0.28863478065843035
2B11_HUMAN	24286	Reproductive organ and breast investigations (excl hormone analyses)	3355	5	0.41588	0.0412	0.024315246318721003
2B11_HUMAN	24286	Reproductive tract and breast disorders congenital	2630	4	0.42443000000000003	0.09819	0.05415658027559199
2B11_HUMAN	24286	Reproductive tract disorders NEC	24102	21	0.24299	0.0	0.0
2B11_HUMAN	24286	Respiratory and mediastinal neoplasms benign (excl mesotheliomas)	1520	2	0.36712	0.19187	0.09888913575897398
2B11_HUMAN	24286	Respiratory and mediastinal neoplasms malignant and unspecified	23789	61	0.71633	0.00757	0.00497683369696794
2B11_HUMAN	24286	Respiratory and pulmonary investigations (excl blood gases)	7246	6	0.23092	1e-05	8.460741970690573e-06
2B11_HUMAN	24286	Respiratory disorders NEC	618843	2250	1.0167899999999999	0.40852	0.19042040455535914
2B11_HUMAN	24286	Respiratory disorders congenital	2995	3	0.27939	0.013030000000000002	0.008299129934060378
2B11_HUMAN	24286	Respiratory tract infections	317629	629	0.55289	0.0	0.0
2B11_HUMAN	24286	Respiratory tract neoplasms	27308	65	0.66482	0.00054	0.0004023692944694555
2B11_HUMAN	24286	Respiratory tract therapeutic procedures	5830	8	0.38288	0.0027600000000000003	0.0019117485337243403
2B11_HUMAN	24286	Retina, choroid and vitreous haemorrhages and vascular disorders	11953	16	0.37348000000000003	1e-05	8.460741970690573e-06
2B11_HUMAN	24286	Salivary gland conditions	44406	79	0.4966	0.0	0.0
2B11_HUMAN	24286	Schizophrenia and other psychotic disorders	20418	37	0.50585	0.0	0.0
2B11_HUMAN	24286	Seizures (incl subtypes)	107497	651	1.69773	0.0	0.0
2B11_HUMAN	24286	Sexual dysfunctions, disturbances and gender identity disorders	30237	19	0.1752	0.0	0.0
2B11_HUMAN	24286	Sexual function and fertility disorders	33222	22	0.18464	0.0	0.0
2B11_HUMAN	24286	Skeletal neoplasms malignant and unspecified	2424	11	1.27023	0.39204	0.18383842415468926
2B11_HUMAN	24286	Skin and subcutaneous tissue disorders NEC	39119	311	2.23298	0.0	0.0
2B11_HUMAN	24286	Skin and subcutaneous tissue disorders congenital	1516	3	0.5524899999999999	0.39078	0.1834220642116376
2B11_HUMAN	24286	Skin and subcutaneous tissue infections and infestations	67121	247	1.0291700000000001	0.64908	0.28209375404298137
2B11_HUMAN	24286	Skin and subcutaneous tissue therapeutic procedures	1668	3	0.5020600000000001	0.30261	0.14735152764579876
2B11_HUMAN	24286	Skin appendage conditions	152879	614	1.12361	0.004220000000000001	0.0028586130923484825
2B11_HUMAN	24286	Skin neoplasms malignant and unspecified	17465	58	0.92843	0.61188	0.26795249062124304
2B11_HUMAN	24286	Skin vascular abnormalities	90266	679	2.1118900000000003	0.0	0.0
2B11_HUMAN	24286	Sleep disorders and disturbances	263347	643	0.68201	0.0	0.0
2B11_HUMAN	24286	Sleep disturbances (incl subtypes)	163046	492	0.84336	0.0001	7.937063549013775e-05
2B11_HUMAN	24286	Soft tissue neoplasms benign	3879	12	0.86467	0.78675	0.3293907550418442
2B11_HUMAN	24286	Soft tissue sarcomas	2342	15	1.79614	0.03445	0.020592172033373317
2B11_HUMAN	24286	Soft tissue therapeutic procedures	853	2	0.65486	0.77564	0.3259172774189962
2B11_HUMAN	24286	Somatoform and factitious disorders	9613	18	0.52272	0.0034700000000000004	0.0023738083026609547
2B11_HUMAN	24286	Spinal cord and nerve root disorders	19777	85	1.20275	0.0944	0.05225241059440986
2B11_HUMAN	24286	Spleen, lymphatic and reticuloendothelial system disorders	31984	170	1.48894	0.0	0.0
2B11_HUMAN	24286	Structural brain disorders	12793	48	1.04941	0.7106399999999999	0.30412936163787607
2B11_HUMAN	24286	Suicidal and self-injurious behaviours NEC	110356	197	0.4983	0.0	0.0
2B11_HUMAN	24286	Synovial and bursal disorders	8642	11	0.35512	5.9999999999999995e-05	4.840172901435508e-05
2B11_HUMAN	24286	Tendon, ligament and cartilage disorders	31005	74	0.6666300000000001	0.00023999999999999998	0.0001845793798173539
2B11_HUMAN	24286	Testicular and epididymal disorders	3796	12	0.88364	0.78568	0.329020232147969
2B11_HUMAN	24286	Therapeutic and nontherapeutic effects (excl toxicity)	684282	2723	1.11324	0.0	0.0
2B11_HUMAN	24286	Therapeutic procedures and supportive care NEC	180894	409	0.63143	0.0	0.0
2B11_HUMAN	24286	Thoracic disorders (excl lung and pleura)	13512	30	0.62003	0.00602	0.004003827737162048
2B11_HUMAN	24286	Thyroid gland disorders	31831	110	0.96625	0.77754	0.32637392632358386
2B11_HUMAN	24286	Tissue disorders NEC	48298	181	1.04816	0.51543	0.23220670438233557
2B11_HUMAN	24286	Tongue conditions	74655	225	0.8423299999999999	0.008759999999999999	0.005711989302583052
2B11_HUMAN	24286	Toxicology and therapeutic drug monitoring	32361	39	0.33621	0.0	0.0
2B11_HUMAN	24286	Upper respiratory tract disorders (excl infections)	101683	230	0.6317	0.0	0.0
2B11_HUMAN	24286	Ureteric disorders	2247	4	0.49691	0.21125	0.10755071511967308
2B11_HUMAN	24286	Urethral disorders (excl calculi)	2892	7	0.67608	0.43201000000000006	0.19988321745030127
2B11_HUMAN	24286	Urinary tract signs and symptoms	122022	368	0.84288	0.0007700000000000001	0.0005658920381804334
2B11_HUMAN	24286	Urolithiases	17054	70	1.1484299999999998	0.24708000000000002	0.12363678292820181
2B11_HUMAN	24286	Uterine, pelvic and broad ligament disorders	25740	74	0.80338	0.05951	0.0341589426186453
2B11_HUMAN	24286	Vascular disorders NEC	279434	1102	1.10322	0.0010199999999999999	0.0007404022376771693
2B11_HUMAN	24286	Vascular haemorrhagic disorders	417455	1182	0.7912	0.0	0.0
2B11_HUMAN	24286	Vascular hypertensive disorders	113157	160	0.39455	0.0	0.0
2B11_HUMAN	24286	Vascular inflammations	15808	41	0.7245699999999999	0.0383	0.022731978326876765
2B11_HUMAN	24286	Vascular injuries	2240	12	1.50076	0.15405	0.08118117167209914
2B11_HUMAN	24286	Vascular therapeutic procedures	15423	14	0.25316	0.0	0.0
2B11_HUMAN	24286	Venous varices	15997	17	0.29643	0.0	0.0
2B11_HUMAN	24286	Viral infectious disorders	124351	390	0.87665	0.00834	0.005454714586518215
2B11_HUMAN	24286	Vision disorders	144791	706	1.36531	0.0	0.0
2B11_HUMAN	24286	Vitamin related disorders	8302	25	0.8416100000000001	0.46081000000000005	0.2111138067240474
2B11_HUMAN	24286	Vulvovaginal disorders (excl infections and inflammations)	32718	54	0.46065	0.0	0.0
2B11_HUMAN	24286	Water, electrolyte and mineral investigations	48785	80	0.45768000000000003	0.0	0.0
2B11_HUMAN	24286	White blood cell disorders	105036	75	0.1991	0.0	0.0
5HT1A_HUMAN	513061	Abdominal hernias and other abdominal wall conditions	16184	1629	1.36956	0.0	0.0
5HT1A_HUMAN	513061	Abortions and stillbirth	27420	1492	0.70416	0.0	0.0
5HT1A_HUMAN	513061	Acid-base disorders	59306	7686	1.8220299999999998	0.0	0.0
5HT1A_HUMAN	513061	Adjustment disorders (incl subtypes)	952	192	3.09144	0.0	0.0
5HT1A_HUMAN	513061	Administration site reactions	325762	12737	0.49792	0.0	0.0
5HT1A_HUMAN	513061	Adrenal gland disorders	8941	888	1.3493600000000001	0.0	0.0
5HT1A_HUMAN	513061	Age related factors	1700	197	1.60391	0.0	0.0
5HT1A_HUMAN	513061	Allergic conditions	330561	21086	0.8337600000000001	0.0	0.0
5HT1A_HUMAN	513061	Anaemias nonhaemolytic and marrow depression	127438	11258	1.1857799999999998	0.0	0.0
5HT1A_HUMAN	513061	Anal and rectal conditions NEC	13492	805	0.77644	0.0	0.0
5HT1A_HUMAN	513061	Ancillary infectious topics	26835	2015	0.99345	0.7901	0.3305994999169604
5HT1A_HUMAN	513061	Aneurysms and artery dissections	10593	803	1.00371	0.9121100000000001	0.3733971411291051
5HT1A_HUMAN	513061	Angioedema and urticaria	115947	6405	0.7155	0.0	0.0
5HT1A_HUMAN	513061	Anterior eye structural change, deposit and degeneration	28519	1831	0.83955	0.0	0.0
5HT1A_HUMAN	513061	Anxiety disorders and symptoms	214467	35459	2.42397	0.0	0.0
5HT1A_HUMAN	513061	Appetite and general nutritional disorders	157395	23010	2.09527	0.0	0.0
5HT1A_HUMAN	513061	Arteriosclerosis, stenosis, vascular insufficiency and necrosis	300539	19728	0.85969	0.0	0.0
5HT1A_HUMAN	513061	Aural disorders NEC	22997	1807	1.04352	0.08235	0.04604557615959362
5HT1A_HUMAN	513061	Autoimmune disorders	73876	3865	0.67555	0.0	0.0
5HT1A_HUMAN	513061	Bacterial infectious disorders	115621	9134	1.0496299999999998	1e-05	8.460741970690573e-06
5HT1A_HUMAN	513061	Benign neoplasms gastrointestinal	7492	659	1.18018	7e-05	5.618385189904781e-05
5HT1A_HUMAN	513061	Bile duct disorders	9028	963	1.46115	0.0	0.0
5HT1A_HUMAN	513061	Bladder and bladder neck disorders (excl calculi)	39461	2716	0.90449	0.0	0.0
5HT1A_HUMAN	513061	Blood and lymphatic system disorders congenital	3344	199	0.7742899999999999	0.00032	0.00024337967699196675
5HT1A_HUMAN	513061	Body temperature conditions	172155	19413	1.55528	0.0	0.0
5HT1A_HUMAN	513061	Bone and joint injuries	123309	9718	1.0469	1e-05	8.460741970690573e-06
5HT1A_HUMAN	513061	Bone and joint therapeutic procedures	30966	1914	0.80619	0.0	0.0
5HT1A_HUMAN	513061	Bone disorders (excl congenital and fractures)	104336	6379	0.79688	0.0	0.0
5HT1A_HUMAN	513061	Bone, calcium, magnesium and phosphorus metabolism disorders	43097	3838	1.1963	0.0	0.0
5HT1A_HUMAN	513061	Breast disorders	78951	11469	2.07975	0.0	0.0
5HT1A_HUMAN	513061	Breast neoplasms benign (incl nipple)	2309	248	1.4724700000000002	0.0	0.0
5HT1A_HUMAN	513061	Breast neoplasms malignant and unspecified (incl nipple)	49167	1868	0.48328000000000004	0.0	0.0
5HT1A_HUMAN	513061	Breast therapeutic procedures	2104	201	1.2925	0.00082	0.0006011137423521139
5HT1A_HUMAN	513061	Bronchial disorders (excl neoplasms)	80293	6873	1.14553	0.0	0.0
5HT1A_HUMAN	513061	Cardiac and vascular disorders congenital	14353	1521	1.4504700000000001	0.0	0.0
5HT1A_HUMAN	513061	Cardiac and vascular investigations (excl enzyme tests)	186678	21326	1.5782399999999999	0.0	0.0
5HT1A_HUMAN	513061	Cardiac arrhythmias	218674	30315	1.96945	0.0	0.0
5HT1A_HUMAN	513061	Cardiac disorder signs and symptoms	542853	44318	1.08782	0.0	0.0
5HT1A_HUMAN	513061	Cardiac neoplasms	331	34	1.40086	0.07572999999999999	0.04270125889776506
5HT1A_HUMAN	513061	Cardiac therapeutic procedures	10242	500	0.62805	0.0	0.0
5HT1A_HUMAN	513061	Cardiac valve disorders	19057	2655	1.9808	0.0	0.0
5HT1A_HUMAN	513061	Central nervous system infections and inflammations	19686	1318	0.8780700000000001	0.0	0.0
5HT1A_HUMAN	513061	Central nervous system vascular disorders	172365	11498	0.87464	0.0	0.0
5HT1A_HUMAN	513061	Cervix disorders (excl infections and inflammations)	4159	262	0.82271	0.00186	0.00131206981030822
5HT1A_HUMAN	513061	Changes in physical activity	34687	8482	3.96084	0.0	0.0
5HT1A_HUMAN	513061	Chemical injury and poisoning	123001	12553	1.3908	0.0	0.0
5HT1A_HUMAN	513061	Chlamydial infectious disorders	522	27	0.66747	0.03815	0.022646209929709286
5HT1A_HUMAN	513061	Chromosomal abnormalities and abnormal gene carriers	2430	163	0.87985	0.11557	0.06276615530166943
5HT1A_HUMAN	513061	Coagulopathies and bleeding diatheses (excl thrombocytopenic)	42323	3318	1.04095	0.026810000000000004	0.01628297553201463
5HT1A_HUMAN	513061	Cognitive and attention disorders and disturbances	66027	9789	2.13001	0.0	0.0
5HT1A_HUMAN	513061	Communication disorders and disturbances	72637	10599	2.09065	0.0	0.0
5HT1A_HUMAN	513061	Congenital and hereditary disorders NEC	10074	1089	1.48314	0.0	0.0
5HT1A_HUMAN	513061	Congenital and peripartum neurological conditions	4994	511	1.3948399999999999	0.0	0.0
5HT1A_HUMAN	513061	Congenital cardiac disorders	6451	610	1.27796	0.0	0.0
5HT1A_HUMAN	513061	Congenital ear disorders (excl deafness)	1075	77	0.9441299999999999	0.68608	0.2953269516437518
5HT1A_HUMAN	513061	Congenital eye disorders (excl glaucoma)	886	63	0.93673	0.6566	0.2849346436500038
5HT1A_HUMAN	513061	Congenital reproductive tract and breast disorders	1844	170	1.2427	0.00815	0.0053377597735511165
5HT1A_HUMAN	513061	Congenital respiratory tract disorders	1190	94	1.04952	0.6605800000000001	0.2863836318358022
5HT1A_HUMAN	513061	Connective tissue disorders (excl congenital)	21636	1256	0.75415	0.0	0.0
5HT1A_HUMAN	513061	Cornification and dystrophic skin disorders	9417	770	1.08968	0.0236	0.014458967448206916
5HT1A_HUMAN	513061	Coronary artery disorders	278562	19660	0.9292299999999999	0.0	0.0
5HT1A_HUMAN	513061	Cranial nerve disorders (excl neoplasms)	52382	4111	1.04216	0.0111	0.00713864327701002
5HT1A_HUMAN	513061	Cutaneous neoplasms benign	5790	474	1.09111	0.06938	0.039411566500488514
5HT1A_HUMAN	513061	Cytogenetic investigations	573	16	0.35151	0.0	0.0
5HT1A_HUMAN	513061	Cytoplasmic disorders congenital	378	23	0.79282	0.32971	0.1588537606306407
5HT1A_HUMAN	513061	Decreased and nonspecific blood pressure disorders and shock	378305	37120	1.33135	0.0	0.0
5HT1A_HUMAN	513061	Deliria (incl confusion)	90586	15690	2.56353	0.0	0.0
5HT1A_HUMAN	513061	Dementia and amnestic conditions	87697	10694	1.69944	0.0	0.0
5HT1A_HUMAN	513061	Demyelinating disorders	52603	2378	0.57938	0.0	0.0
5HT1A_HUMAN	513061	Dental and gingival conditions	47772	3679	1.02102	0.22391	0.11336044454119708
5HT1A_HUMAN	513061	Depressed mood disorders and disturbances	141290	20672	2.09722	0.0	0.0
5HT1A_HUMAN	513061	Developmental disorders NEC	2757	502	2.72415	0.0	0.0
5HT1A_HUMAN	513061	Diabetic complications	17966	5159	4.92937	0.0	0.0
5HT1A_HUMAN	513061	Dissociative disorders	2897	579	3.0566	0.0	0.0
5HT1A_HUMAN	513061	Disturbances in thinking and perception	62652	15923	4.16977	0.0	0.0
5HT1A_HUMAN	513061	Diverticular disorders	15412	1382	1.20538	0.0	0.0
5HT1A_HUMAN	513061	Ear and labyrinthine disorders congenital	1154	86	0.9853700000000001	0.95557	0.38959902454373824
5HT1A_HUMAN	513061	Eating disorders and disturbances	34169	5237	2.21502	0.0	0.0
5HT1A_HUMAN	513061	Economic and housing issues	11788	1216	1.40751	0.0	0.0
5HT1A_HUMAN	513061	Ectoparasitic disorders	616	56	1.2237	0.14745	0.0780905821007947
5HT1A_HUMAN	513061	Electrolyte and fluid balance conditions	261572	26279	1.3667	0.0	0.0
5HT1A_HUMAN	513061	Embolism and thrombosis	148186	12455	1.12289	0.0	0.0
5HT1A_HUMAN	513061	Encephalopathies	21467	2829	1.8574099999999998	0.0	0.0
5HT1A_HUMAN	513061	Endocardial disorders	3205	281	1.1759899999999999	0.011009999999999999	0.007082319148936169
5HT1A_HUMAN	513061	Endocrine and glandular disorders NEC	616	184	5.21204	0.0	0.0
5HT1A_HUMAN	513061	Endocrine disorders congenital	383	57	2.13959	0.0	0.0
5HT1A_HUMAN	513061	Endocrine disorders of gonadal function	47601	8496	2.65862	0.0	0.0
5HT1A_HUMAN	513061	Endocrine gland therapeutic procedures	1573	98	0.81303	0.050210000000000005	0.029212083696823526
5HT1A_HUMAN	513061	Endocrine investigations (incl sex hormones)	25080	3644	2.08022	0.0	0.0
5HT1A_HUMAN	513061	Endocrine neoplasms benign	2304	436	2.85617	0.0	0.0
5HT1A_HUMAN	513061	Endocrine neoplasms malignant and unspecified	9017	834	1.2471700000000001	0.0	0.0
5HT1A_HUMAN	513061	Environmental issues	573	39	0.89371	0.5795399999999999	0.2560015097794748
5HT1A_HUMAN	513061	Enzyme investigations NEC	43698	6672	2.20507	0.0	0.0
5HT1A_HUMAN	513061	Epidermal and dermal conditions	666415	40071	0.78287	0.0	0.0
5HT1A_HUMAN	513061	Exocrine pancreas conditions	41247	7764	2.8374900000000003	0.0	0.0
5HT1A_HUMAN	513061	External ear disorders (excl congenital)	2702	282	1.4259600000000001	0.0	0.0
5HT1A_HUMAN	513061	Eye disorders NEC	66383	4176	0.8214799999999999	0.0	0.0
5HT1A_HUMAN	513061	Eye disorders congenital	1921	132	0.9029	0.28021	0.13778902027118609
5HT1A_HUMAN	513061	Eye therapeutic procedures	5660	273	0.6201399999999999	0.0	0.0
5HT1A_HUMAN	513061	Family issues	5040	511	1.38068	0.0	0.0
5HT1A_HUMAN	513061	Fatal outcomes	307071	19281	0.81984	0.0	0.0
5HT1A_HUMAN	513061	Female reproductive tract infections and inflammations	8399	557	0.86916	0.00118	0.0008498916055872755
5HT1A_HUMAN	513061	Foetal and neonatal investigations	1607	113	0.92555	0.45024	0.20712291415181422
5HT1A_HUMAN	513061	Foetal complications	14238	1271	1.19944	0.0	0.0
5HT1A_HUMAN	513061	Food intolerance syndromes	8964	719	1.06712	0.09692	0.053533591542433985
5HT1A_HUMAN	513061	Fractures	96081	7463	1.03054	0.01214	0.0077694218258280295
5HT1A_HUMAN	513061	Fungal infectious disorders	46404	3185	0.9018	0.0	0.0
5HT1A_HUMAN	513061	Gallbladder disorders	36730	4003	1.49676	0.0	0.0
5HT1A_HUMAN	513061	Gastrointestinal conditions NEC	58886	4399	0.98795	0.44283	0.2042413845707922
5HT1A_HUMAN	513061	Gastrointestinal haemorrhages NEC	104328	7554	0.95519	0.0001	7.937063549013775e-05
5HT1A_HUMAN	513061	Gastrointestinal infections	49172	3572	0.9585600000000001	0.01432	0.009066074744175007
5HT1A_HUMAN	513061	Gastrointestinal inflammatory conditions	71493	6027	1.12657	0.0	0.0
5HT1A_HUMAN	513061	Gastrointestinal investigations	10977	1109	1.37523	0.0	0.0
5HT1A_HUMAN	513061	Gastrointestinal motility and defaecation conditions	305542	26448	1.15962	0.0	0.0
5HT1A_HUMAN	513061	Gastrointestinal neoplasms benign	8328	723	1.16336	0.00013000000000000002	0.0001022796273485887
5HT1A_HUMAN	513061	Gastrointestinal neoplasms malignant and unspecified	30233	1921	0.83029	0.0	0.0
5HT1A_HUMAN	513061	Gastrointestinal signs and symptoms	677692	57349	1.13127	0.0	0.0
5HT1A_HUMAN	513061	Gastrointestinal stenosis and obstruction	31359	3508	1.54132	0.0	0.0
5HT1A_HUMAN	513061	Gastrointestinal therapeutic procedures	16874	1342	1.0573	0.05068	0.02946530515438806
5HT1A_HUMAN	513061	Gastrointestinal tract disorders congenital	5083	606	1.65638	0.0	0.0
5HT1A_HUMAN	513061	Gastrointestinal ulceration and perforation	41810	3389	1.07939	2e-05	1.6652132005324277e-05
5HT1A_HUMAN	513061	Gastrointestinal vascular conditions	17715	1912	1.48055	0.0	0.0
5HT1A_HUMAN	513061	Gender related factors	644	111	2.54841	0.0	0.0
5HT1A_HUMAN	513061	General system disorders NEC	1483087	118623	1.06385	0.0	0.0
5HT1A_HUMAN	513061	Genitourinary tract disorders NEC	66124	6870	1.41877	0.0	0.0
5HT1A_HUMAN	513061	Glaucoma and ocular hypertension	9263	826	1.19802	0.0	0.0
5HT1A_HUMAN	513061	Glucose metabolism disorders (incl diabetes mellitus)	103625	23516	3.59216	0.0	0.0
5HT1A_HUMAN	513061	Gonadotrophin and sex hormone changes	291	49	2.4777299999999998	0.0	0.0
5HT1A_HUMAN	513061	Haematological and lymphoid tissue therapeutic procedures	24446	1638	0.87882	0.0	0.0
5HT1A_HUMAN	513061	Haematological disorders NEC	10574	729	0.90612	0.00993	0.006430924669760799
5HT1A_HUMAN	513061	Haematology investigations (incl blood groups)	191896	21607	1.5526799999999998	0.0	0.0
5HT1A_HUMAN	513061	Haematopoietic neoplasms (excl leukaemias and lymphomas)	7665	357	0.59778	0.0	0.0
5HT1A_HUMAN	513061	Haemoglobinopathies	2301	107	0.5967899999999999	0.0	0.0
5HT1A_HUMAN	513061	Haemolyses and related conditions	29699	2183	0.97083	0.18671	0.09655339783683312
5HT1A_HUMAN	513061	Head and neck therapeutic procedures	13635	970	0.93722	0.0516	0.029953726519248616
5HT1A_HUMAN	513061	Headaches	258675	22439	1.1623299999999999	0.0	0.0
5HT1A_HUMAN	513061	Hearing disorders	28721	1957	0.8947700000000001	0.0	0.0
5HT1A_HUMAN	513061	Heart failures	230830	17426	0.99924	0.92658	0.37871913585810335
5HT1A_HUMAN	513061	Helminthic disorders	741	39	0.67983	0.01782	0.011131516963043568
5HT1A_HUMAN	513061	Hepatic and biliary neoplasms benign	3244	369	1.57059	0.0	0.0
5HT1A_HUMAN	513061	Hepatic and hepatobiliary disorders	160023	15128	1.27762	0.0	0.0
5HT1A_HUMAN	513061	Hepatobiliary disorders congenital	190	19	1.35966	0.21429	0.10894676569506725
5HT1A_HUMAN	513061	Hepatobiliary investigations	97697	10608	1.49054	0.0	0.0
5HT1A_HUMAN	513061	Hepatobiliary neoplasms	12957	976	0.99685	0.94694	0.3863270540397089
5HT1A_HUMAN	513061	Hepatobiliary neoplasms malignant and unspecified	5969	404	0.88836	0.02125	0.013123267990767159
5HT1A_HUMAN	513061	Hepatobiliary therapeutic procedures	11256	945	1.12151	0.00084	0.0006153026118137327
5HT1A_HUMAN	513061	Hypothalamus and pituitary gland disorders	15821	6932	9.54288	0.0	0.0
5HT1A_HUMAN	513061	Immune disorders NEC	75386	3940	0.67483	0.0	0.0
5HT1A_HUMAN	513061	Immune system disorders congenital	214	12	0.72695	0.36344	0.17251146360482095
5HT1A_HUMAN	513061	Immunodeficiency syndromes	11416	681	0.77628	0.0	0.0
5HT1A_HUMAN	513061	Immunology and allergy investigations	18435	1155	0.81792	0.0	0.0
5HT1A_HUMAN	513061	Impulse control disorders NEC	5185	2879	15.277629999999998	0.0	0.0
5HT1A_HUMAN	513061	Inborn errors of metabolism	1799	145	1.07277	0.42172	0.19582046976429873
5HT1A_HUMAN	513061	Increased intracranial pressure and hydrocephalus	13127	1356	1.4096799999999998	0.0	0.0
5HT1A_HUMAN	513061	Infections - pathogen unspecified	549473	41086	0.98895	0.0238	0.014572346659105947
5HT1A_HUMAN	513061	Infections and infestations congenital	176	8	0.5827100000000001	0.15286	0.08064074496300777
5HT1A_HUMAN	513061	Injuries NEC	358480	39675	1.52288	0.0	0.0
5HT1A_HUMAN	513061	Injuries by physical agents	19040	2701	2.0228900000000003	0.0	0.0
5HT1A_HUMAN	513061	Inner ear and VIIIth cranial nerve disorders	43066	3737	1.1627399999999999	0.0	0.0
5HT1A_HUMAN	513061	Investigations, imaging and histopathology procedures NEC	28460	2066	0.95785	0.05901	0.033893390664479814
5HT1A_HUMAN	513061	Iron and trace metal metabolism disorders	6559	755	1.59182	0.0	0.0
5HT1A_HUMAN	513061	Joint disorders	266568	15769	0.7694	0.0	0.0
5HT1A_HUMAN	513061	Legal issues	6758	1273	2.84005	0.0	0.0
5HT1A_HUMAN	513061	Leukaemias	24571	1103	0.57514	0.0	0.0
5HT1A_HUMAN	513061	Lifestyle issues	87109	12235	1.9996200000000002	0.0	0.0
5HT1A_HUMAN	513061	Lipid analyses	35100	6224	2.63758	0.0	0.0
5HT1A_HUMAN	513061	Lipid metabolism disorders	26032	4749	2.7305099999999998	0.0	0.0
5HT1A_HUMAN	513061	Lower respiratory tract disorders (excl obstruction and infection)	95545	9454	1.34379	0.0	0.0
5HT1A_HUMAN	513061	Lymphatic vessel disorders	3609	321	1.1946700000000001	0.0027600000000000003	0.0019117485337243403
5HT1A_HUMAN	513061	Lymphomas Hodgkin's disease	1741	124	0.93839	0.52549	0.23616065305717965
5HT1A_HUMAN	513061	Lymphomas NEC	6822	399	0.76017	0.0	0.0
5HT1A_HUMAN	513061	Lymphomas non-Hodgkin's B-cell	4770	286	0.7805	2.9999999999999997e-05	2.4708510406450908e-05
5HT1A_HUMAN	513061	Lymphomas non-Hodgkin's T-cell	1988	70	0.4466	0.0	0.0
5HT1A_HUMAN	513061	Lymphomas non-Hodgkin's unspecified histology	2851	222	1.03332	0.61988	0.2709025537245832
5HT1A_HUMAN	513061	Malabsorption conditions	9598	674	0.92422	0.04867	0.028377822920215737
5HT1A_HUMAN	513061	Male genital tract therapeutic procedures	1263	84	0.87184	0.24131999999999998	0.12110462890214348
5HT1A_HUMAN	513061	Male reproductive tract infections and inflammations	3281	281	1.1462	0.03166	0.01902553467786818
5HT1A_HUMAN	513061	Malignant and unspecified neoplasms gastrointestinal NEC	32935	2120	0.8418700000000001	0.0	0.0
5HT1A_HUMAN	513061	Manic and bipolar mood disorders and disturbances	15716	6573	8.79728	0.0	0.0
5HT1A_HUMAN	513061	Maternal complications of labour and delivery	9293	773	1.1102299999999998	0.00595	0.003960117409649606
5HT1A_HUMAN	513061	Maternal complications of pregnancy	11186	1166	1.42398	0.0	0.0
5HT1A_HUMAN	513061	Medication errors	467421	48404	1.41359	0.0	0.0
5HT1A_HUMAN	513061	Menopause and related conditions	26771	1848	0.90735	5e-05	4.057040105205715e-05
5HT1A_HUMAN	513061	Menstrual cycle and uterine bleeding disorders	63922	2684	0.53633	0.0	0.0
5HT1A_HUMAN	513061	Mental impairment disorders	130571	17581	1.90405	0.0	0.0
5HT1A_HUMAN	513061	Mesotheliomas	357	26	0.96121	0.9203899999999999	0.3764282918558667
5HT1A_HUMAN	513061	Metabolic and nutritional disorders congenital	2184	206	1.27443	0.0013599999999999999	0.0009735676908627398
5HT1A_HUMAN	513061	Metabolic, nutritional and blood gas investigations	148134	10855	0.9676100000000001	0.00081	0.0005940999991913376
5HT1A_HUMAN	513061	Metabolism disorders NEC	35688	5139	2.05852	0.0	0.0
5HT1A_HUMAN	513061	Metastases	22915	1683	0.96999	0.23426999999999998	0.11797788499977789
5HT1A_HUMAN	513061	Microbiology and serology investigations	19878	1368	0.9043899999999999	0.00028	0.00021411348115673212
5HT1A_HUMAN	513061	Middle ear disorders (excl congenital)	4329	449	1.41608	0.0	0.0
5HT1A_HUMAN	513061	Miscellaneous and site unspecified neoplasms benign	11196	1047	1.2624	0.0	0.0
5HT1A_HUMAN	513061	Miscellaneous and site unspecified neoplasms malignant and unspecified	62091	3909	0.82215	0.0	0.0
5HT1A_HUMAN	513061	Mood disorders and disturbances NEC	137071	20663	2.17212	0.0	0.0
5HT1A_HUMAN	513061	Movement disorders (incl parkinsonism)	180506	37521	3.21113	0.0	0.0
5HT1A_HUMAN	513061	Muscle disorders	305176	30347	1.35122	0.0	0.0
5HT1A_HUMAN	513061	Musculoskeletal and connective tissue deformities (incl intervertebral disc disorders)	36240	3589	1.34509	0.0	0.0
5HT1A_HUMAN	513061	Musculoskeletal and connective tissue disorders NEC	339812	25860	1.00795	0.20931999999999998	0.10666931111398278
5HT1A_HUMAN	513061	Musculoskeletal and connective tissue disorders congenital	9356	933	1.3554700000000002	0.0	0.0
5HT1A_HUMAN	513061	Musculoskeletal and connective tissue neoplasms	12171	1054	1.16018	1e-05	8.460741970690573e-06
5HT1A_HUMAN	513061	Musculoskeletal and soft tissue investigations (excl enzyme tests)	9375	712	1.0057399999999999	0.87569	0.36043003330882817
5HT1A_HUMAN	513061	Mycobacterial infectious disorders	12129	384	0.40008	0.0	0.0
5HT1A_HUMAN	513061	Mycoplasmal infectious disorders	604	56	1.2504899999999999	0.1228	0.06635979075559158
5HT1A_HUMAN	513061	Myocardial disorders	41763	6076	2.08344	0.0	0.0
5HT1A_HUMAN	513061	Neonatal and perinatal conditions	30239	3263	1.4801799999999998	0.0	0.0
5HT1A_HUMAN	513061	Neonatal respiratory disorders	5798	924	2.31985	0.0	0.0
5HT1A_HUMAN	513061	Neoplasm related morbidities	10712	852	1.05739	0.11989000000000001	0.0649389250522544
5HT1A_HUMAN	513061	Neoplastic and ectopic endocrinopathies	2311	232	1.36555	1e-05	8.460741970690573e-06
5HT1A_HUMAN	513061	Nephropathies	22120	1452	0.85969	0.0	0.0
5HT1A_HUMAN	513061	Nervous system neoplasms benign	2453	341	1.97576	0.0	0.0
5HT1A_HUMAN	513061	Nervous system neoplasms malignant and unspecified NEC	8242	696	1.12867	0.00267	0.0018524504891799067
5HT1A_HUMAN	513061	Nervous system, skull and spine therapeutic procedures	6643	598	1.21054	1e-05	8.460741970690573e-06
5HT1A_HUMAN	513061	Neurological disorders NEC	938369	108568	1.60104	0.0	0.0
5HT1A_HUMAN	513061	Neurological disorders congenital	5222	479	1.2358200000000001	2e-05	1.6652132005324277e-05
5HT1A_HUMAN	513061	Neurological disorders of the eye	119728	10440	1.16897	0.0	0.0
5HT1A_HUMAN	513061	Neurological, special senses and psychiatric investigations	14203	1486	1.42991	0.0	0.0
5HT1A_HUMAN	513061	Neuromuscular disorders	109514	17822	2.3784799999999997	0.0	0.0
5HT1A_HUMAN	513061	Obstetric and gynaecological therapeutic procedures	21059	1574	0.9885	0.6665399999999999	0.28850276786225587
5HT1A_HUMAN	513061	Ocular haemorrhages and vascular disorders NEC	10897	555	0.65669	0.0	0.0
5HT1A_HUMAN	513061	Ocular infections, irritations and inflammations	73378	3452	0.6041	0.0	0.0
5HT1A_HUMAN	513061	Ocular injuries	3510	250	0.93842	0.35415	0.16860036846912105
5HT1A_HUMAN	513061	Ocular neoplasms	834	54	0.8471700000000001	0.265	0.13137886175306646
5HT1A_HUMAN	513061	Ocular neuromuscular disorders	27471	4561	2.43618	0.0	0.0
5HT1A_HUMAN	513061	Ocular sensory symptoms NEC	13075	1173	1.20601	0.0	0.0
5HT1A_HUMAN	513061	Ocular structural change, deposit and degeneration NEC	23238	1430	0.8024100000000001	0.0	0.0
5HT1A_HUMAN	513061	Oral soft tissue conditions	152627	11063	0.9563	0.0	0.0
5HT1A_HUMAN	513061	Ovarian and fallopian tube disorders	13507	882	0.8548899999999999	0.0	0.0
5HT1A_HUMAN	513061	Parathyroid gland disorders	8837	841	1.28705	0.0	0.0
5HT1A_HUMAN	513061	Penile and scrotal disorders (excl infections and inflammations)	7478	469	0.81882	2e-05	1.6652132005324277e-05
5HT1A_HUMAN	513061	Pericardial disorders	14148	1473	1.4220899999999999	0.0	0.0
5HT1A_HUMAN	513061	Peripheral neuropathies	53974	5851	1.4878200000000001	0.0	0.0
5HT1A_HUMAN	513061	Peritoneal and retroperitoneal conditions	33282	2217	0.87331	0.0	0.0
5HT1A_HUMAN	513061	Personality disorders and disturbances in behaviour	71406	14866	3.21745	0.0	0.0
5HT1A_HUMAN	513061	Physical examination topics	207297	30943	2.14709	0.0	0.0
5HT1A_HUMAN	513061	Pigmentation disorders	7098	435	0.7989	0.0	0.0
5HT1A_HUMAN	513061	Placental, amniotic and cavity disorders (excl haemorrhages)	4396	357	1.0816	0.15353	0.08095323663633985
5HT1A_HUMAN	513061	Plasma cell neoplasms	16095	1012	0.82104	0.0	0.0
5HT1A_HUMAN	513061	Platelet disorders	51325	4732	1.24279	0.0	0.0
5HT1A_HUMAN	513061	Pleural disorders	38350	3652	1.28795	0.0	0.0
5HT1A_HUMAN	513061	Postpartum and puerperal disorders	2081	347	2.4488	0.0	0.0
5HT1A_HUMAN	513061	Pregnancy, labour, delivery and postpartum conditions	62379	4393	0.9270700000000001	0.0	0.0
5HT1A_HUMAN	513061	Procedural and device related injuries and complications NEC	236255	13108	0.71882	0.0	0.0
5HT1A_HUMAN	513061	Product quality issues	147837	8740	0.7689	0.0	0.0
5HT1A_HUMAN	513061	Prostatic disorders (excl infections and inflammations)	14623	873	0.77694	0.0	0.0
5HT1A_HUMAN	513061	Protein and amino acid metabolism disorders NEC	7094	874	1.71947	0.0	0.0
5HT1A_HUMAN	513061	Protein and chemistry analyses NEC	21380	2951	1.9594799999999999	0.0	0.0
5HT1A_HUMAN	513061	Protozoal infectious disorders	2491	94	0.47988000000000003	0.0	0.0
5HT1A_HUMAN	513061	Psychiatric and behavioural symptoms NEC	45982	8437	2.74985	0.0	0.0
5HT1A_HUMAN	513061	Psychiatric disorders NEC	182062	29724	2.38766	0.0	0.0
5HT1A_HUMAN	513061	Psychiatric therapeutic procedures	163	52	5.73263	0.0	0.0
5HT1A_HUMAN	513061	Pulmonary vascular disorders	69879	6797	1.3185200000000001	0.0	0.0
5HT1A_HUMAN	513061	Purine and pyrimidine metabolism disorders	9204	529	0.74621	0.0	0.0
5HT1A_HUMAN	513061	Red blood cell disorders	2744	346	1.76563	0.0	0.0
5HT1A_HUMAN	513061	Renal and urinary tract disorders congenital	2883	250	1.16188	0.026289999999999997	0.015984923444077974
5HT1A_HUMAN	513061	Renal and urinary tract investigations and urinalyses	62571	5797	1.24947	0.0	0.0
5HT1A_HUMAN	513061	Renal and urinary tract neoplasms benign	4296	493	1.58633	0.0	0.0
5HT1A_HUMAN	513061	Renal and urinary tract neoplasms malignant and unspecified	22349	775	0.43959	0.0	0.0
5HT1A_HUMAN	513061	Renal and urinary tract therapeutic procedures	4374	274	0.81779	0.00099	0.0007197316426069462
5HT1A_HUMAN	513061	Renal disorders (excl nephropathies)	225563	19098	1.13192	0.0	0.0
5HT1A_HUMAN	513061	Reproductive and genitourinary neoplasms gender unspecified NEC	82	6	0.9660799999999999	1.0	0.39291113796942484
5HT1A_HUMAN	513061	Reproductive neoplasms female benign	11166	751	0.8823799999999999	0.0008	0.0005869695351809608
5HT1A_HUMAN	513061	Reproductive neoplasms female malignant and unspecified	9156	550	0.78205	0.0	0.0
5HT1A_HUMAN	513061	Reproductive neoplasms male benign	276	21	1.00775	0.9095	0.3724900659261266
5HT1A_HUMAN	513061	Reproductive neoplasms male malignant and unspecified	9477	435	0.5887100000000001	0.0	0.0
5HT1A_HUMAN	513061	Reproductive organ and breast investigations (excl hormone analyses)	3355	188	0.72641	1e-05	8.460741970690573e-06
5HT1A_HUMAN	513061	Reproductive tract and breast disorders congenital	2630	226	1.1504	0.04623	0.02704555041699723
5HT1A_HUMAN	513061	Reproductive tract disorders NEC	24102	1159	0.61817	0.0	0.0
5HT1A_HUMAN	513061	Respiratory and mediastinal neoplasms benign (excl mesotheliomas)	1520	124	1.08695	0.38203000000000004	0.18022813733700208
5HT1A_HUMAN	513061	Respiratory and mediastinal neoplasms malignant and unspecified	23789	2013	1.1312	0.0	0.0
5HT1A_HUMAN	513061	Respiratory and pulmonary investigations (excl blood gases)	7246	626	1.15715	0.00061	0.0004522692345420658
5HT1A_HUMAN	513061	Respiratory disorders NEC	618843	53436	1.1565	0.0	0.0
5HT1A_HUMAN	513061	Respiratory disorders congenital	2995	210	0.9227200000000001	0.2686	0.13295288095264082
5HT1A_HUMAN	513061	Respiratory tract infections	317629	23439	0.97496	0.00011999999999999999	9.468135080119003e-05
5HT1A_HUMAN	513061	Respiratory tract neoplasms	27308	2272	1.1105	0.0	0.0
5HT1A_HUMAN	513061	Respiratory tract therapeutic procedures	5830	579	1.34931	0.0	0.0
5HT1A_HUMAN	513061	Retina, choroid and vitreous haemorrhages and vascular disorders	11953	714	0.7774	0.0	0.0
5HT1A_HUMAN	513061	Rickettsial infectious disorders	359	23	0.83765	0.48395	0.22018582801189862
5HT1A_HUMAN	513061	Salivary gland conditions	44406	5693	1.7995299999999999	0.0	0.0
5HT1A_HUMAN	513061	Schizophrenia and other psychotic disorders	20418	9943	11.61548	0.0	0.0
5HT1A_HUMAN	513061	Seizures (incl subtypes)	107497	13923	1.82075	0.0	0.0
5HT1A_HUMAN	513061	Sexual dysfunctions, disturbances and gender identity disorders	30237	4173	1.95921	0.0	0.0
5HT1A_HUMAN	513061	Sexual function and fertility disorders	33222	4502	1.9182	0.0	0.0
5HT1A_HUMAN	513061	Skeletal neoplasms benign	945	91	1.3039399999999999	0.01913	0.011890374441490091
5HT1A_HUMAN	513061	Skeletal neoplasms malignant and unspecified	2424	187	1.02294	0.75843	0.3197686951186066
5HT1A_HUMAN	513061	Skin and subcutaneous tissue disorders NEC	39119	2642	0.88631	0.0	0.0
5HT1A_HUMAN	513061	Skin and subcutaneous tissue disorders congenital	1516	113	0.98559	0.9225899999999999	0.377237909115499
5HT1A_HUMAN	513061	Skin and subcutaneous tissue infections and infestations	67121	5072	1.00027	0.9824299999999999	0.39291113796942484
5HT1A_HUMAN	513061	Skin and subcutaneous tissue therapeutic procedures	1668	141	1.12994	0.16447	0.08613928443566735
5HT1A_HUMAN	513061	Skin appendage conditions	152879	13358	1.17159	0.0	0.0
5HT1A_HUMAN	513061	Skin investigations	274	22	1.06831	0.73148	0.31096025422298884
5HT1A_HUMAN	513061	Skin neoplasms malignant and unspecified	17465	908	0.67109	0.0	0.0
5HT1A_HUMAN	513061	Skin vascular abnormalities	90266	5396	0.7780199999999999	0.0	0.0
5HT1A_HUMAN	513061	Sleep disorders and disturbances	263347	42395	2.34796	0.0	0.0
5HT1A_HUMAN	513061	Sleep disturbances (incl subtypes)	163046	25065	2.2229099999999997	0.0	0.0
5HT1A_HUMAN	513061	Soft tissue neoplasms benign	3879	360	1.25186	8e-05	6.395487197567318e-05
5HT1A_HUMAN	513061	Soft tissue neoplasms malignant and unspecified (excl sarcomas)	179	7	0.49801999999999996	0.06557	0.03739435990945674
5HT1A_HUMAN	513061	Soft tissue sarcomas	2342	101	0.5515100000000001	0.0	0.0
5HT1A_HUMAN	513061	Soft tissue therapeutic procedures	853	68	1.06002	0.64988	0.2823534968384748
5HT1A_HUMAN	513061	Somatoform and factitious disorders	9613	1318	1.9443400000000002	0.0	0.0
5HT1A_HUMAN	513061	Spinal cord and nerve root disorders	19777	2131	1.4777799999999999	0.0	0.0
5HT1A_HUMAN	513061	Spleen, lymphatic and reticuloendothelial system disorders	31984	2738	1.14562	0.0	0.0
5HT1A_HUMAN	513061	Structural brain disorders	12793	1890	2.1212400000000002	0.0	0.0
5HT1A_HUMAN	513061	Suicidal and self-injurious behaviours NEC	110356	27511	4.06363	0.0	0.0
5HT1A_HUMAN	513061	Synovial and bursal disorders	8642	777	1.20892	0.0	0.0
5HT1A_HUMAN	513061	Tendon, ligament and cartilage disorders	31005	1872	0.7863100000000001	0.0	0.0
5HT1A_HUMAN	513061	Testicular and epididymal disorders	3796	292	1.01975	0.73546	0.3120904931224852
5HT1A_HUMAN	513061	Therapeutic and nontherapeutic effects (excl toxicity)	684282	58860	1.15165	0.0	0.0
5HT1A_HUMAN	513061	Therapeutic procedures and supportive care NEC	180894	20645	1.5765	0.0	0.0
5HT1A_HUMAN	513061	Thoracic disorders (excl lung and pleura)	13512	1441	1.46081	0.0	0.0
5HT1A_HUMAN	513061	Thyroid gland disorders	31831	3416	1.4711100000000001	0.0	0.0
5HT1A_HUMAN	513061	Tissue disorders NEC	48298	3582	0.98025	0.25408000000000003	0.1267758254574261
5HT1A_HUMAN	513061	Tongue conditions	74655	6784	1.22314	0.0	0.0
5HT1A_HUMAN	513061	Toxicology and therapeutic drug monitoring	32361	6187	2.89257	0.0	0.0
5HT1A_HUMAN	513061	Upper respiratory tract disorders (excl infections)	101683	7132	0.92304	0.0	0.0
5HT1A_HUMAN	513061	Ureteric disorders	2247	270	1.6712099999999999	0.0	0.0
5HT1A_HUMAN	513061	Urethral disorders (excl calculi)	2892	269	1.25495	0.00056	0.00041646099982781376
5HT1A_HUMAN	513061	Urinary tract signs and symptoms	122022	12832	1.4380899999999999	0.0	0.0
5HT1A_HUMAN	513061	Urolithiases	17054	1310	1.01819	0.52332	0.2352868593636143
5HT1A_HUMAN	513061	Uterine, pelvic and broad ligament disorders	25740	1597	0.80945	0.0	0.0
5HT1A_HUMAN	513061	Vascular disorders NEC	279434	21253	1.0073299999999998	0.29585	0.14447014073587527
5HT1A_HUMAN	513061	Vascular haemorrhagic disorders	417455	24707	0.7698	0.0	0.0
5HT1A_HUMAN	513061	Vascular hypertensive disorders	113157	12007	1.45259	0.0	0.0
5HT1A_HUMAN	513061	Vascular inflammations	15808	1064	0.88308	7e-05	5.618385189904781e-05
5HT1A_HUMAN	513061	Vascular injuries	2240	114	0.65617	0.0	0.0
5HT1A_HUMAN	513061	Vascular therapeutic procedures	15423	664	0.55053	0.0	0.0
5HT1A_HUMAN	513061	Venous varices	15997	1579	1.3401399999999999	0.0	0.0
5HT1A_HUMAN	513061	Viral infectious disorders	124351	7645	0.8016	0.0	0.0
5HT1A_HUMAN	513061	Vision disorders	144791	11946	1.1004	0.0	0.0
5HT1A_HUMAN	513061	Vitamin related disorders	8302	955	1.5906200000000001	0.0	0.0
5HT1A_HUMAN	513061	Vulvovaginal disorders (excl infections and inflammations)	32718	1425	0.55724	0.0	0.0
5HT1A_HUMAN	513061	Water, electrolyte and mineral investigations	48785	5277	1.4842	0.0	0.0
5HT1A_HUMAN	513061	White blood cell disorders	105036	15631	2.13943	0.0	0.0
5HT1B_HUMAN	393144	Abdominal hernias and other abdominal wall conditions	16184	1306	1.42859	0.0	0.0
5HT1B_HUMAN	393144	Abortions and stillbirth	27420	1273	0.79235	0.0	0.0
5HT1B_HUMAN	393144	Acid-base disorders	59306	6316	1.9398	0.0	0.0
5HT1B_HUMAN	393144	Adjustment disorders (incl subtypes)	952	162	3.3373	0.0	0.0
5HT1B_HUMAN	393144	Administration site reactions	325762	9113	0.46837	0.0	0.0
5HT1B_HUMAN	393144	Adrenal gland disorders	8941	723	1.43179	0.0	0.0
5HT1B_HUMAN	393144	Age related factors	1700	149	1.56344	0.0	0.0
5HT1B_HUMAN	393144	Allergic conditions	330561	16444	0.8519700000000001	0.0	0.0
5HT1B_HUMAN	393144	Anaemias nonhaemolytic and marrow depression	127438	9200	1.26631	0.0	0.0
5HT1B_HUMAN	393144	Anal and rectal conditions NEC	13492	633	0.80113	0.0	0.0
5HT1B_HUMAN	393144	Ancillary infectious topics	26835	1557	1.00243	0.92696	0.37886762320198997
5HT1B_HUMAN	393144	Aneurysms and artery dissections	10593	636	1.0395299999999998	0.33824	0.16234431738203214
5HT1B_HUMAN	393144	Angioedema and urticaria	115947	4921	0.72133	0.0	0.0
5HT1B_HUMAN	393144	Anterior eye structural change, deposit and degeneration	28519	1445	0.86861	0.0	0.0
5HT1B_HUMAN	393144	Anxiety disorders and symptoms	214467	27192	2.3630299999999997	0.0	0.0
5HT1B_HUMAN	393144	Appetite and general nutritional disorders	157395	15803	1.8163900000000002	0.0	0.0
5HT1B_HUMAN	393144	Arteriosclerosis, stenosis, vascular insufficiency and necrosis	300539	15765	0.90095	0.0	0.0
5HT1B_HUMAN	393144	Aural disorders NEC	22997	1392	1.04856	0.08702	0.04849593855606759
5HT1B_HUMAN	393144	Autoimmune disorders	73876	2954	0.67786	0.0	0.0
5HT1B_HUMAN	393144	Bacterial infectious disorders	115621	7344	1.10384	0.0	0.0
5HT1B_HUMAN	393144	Benign neoplasms gastrointestinal	7492	498	1.1588100000000001	0.0018100000000000002	0.0012784695776775774
5HT1B_HUMAN	393144	Bile duct disorders	9028	831	1.64989	0.0	0.0
5HT1B_HUMAN	393144	Bladder and bladder neck disorders (excl calculi)	39461	2132	0.9295	0.0009	0.000657071792518896
5HT1B_HUMAN	393144	Blood and lymphatic system disorders congenital	3344	152	0.77498	0.0016300000000000002	0.0011572137512132503
5HT1B_HUMAN	393144	Body temperature conditions	172155	15915	1.65776	0.0	0.0
5HT1B_HUMAN	393144	Bone and joint injuries	123309	7665	1.07869	0.0	0.0
5HT1B_HUMAN	393144	Bone and joint therapeutic procedures	30966	1522	0.84125	0.0	0.0
5HT1B_HUMAN	393144	Bone disorders (excl congenital and fractures)	104336	5029	0.82416	0.0	0.0
5HT1B_HUMAN	393144	Bone, calcium, magnesium and phosphorus metabolism disorders	43097	3079	1.25217	0.0	0.0
5HT1B_HUMAN	393144	Breast disorders	78951	3609	0.77957	0.0	0.0
5HT1B_HUMAN	393144	Breast neoplasms benign (incl nipple)	2309	175	1.3346	0.00042	0.0003161196630845193
5HT1B_HUMAN	393144	Breast neoplasms malignant and unspecified (incl nipple)	49167	1451	0.49488999999999994	0.0	0.0
5HT1B_HUMAN	393144	Breast therapeutic procedures	2104	157	1.31233	0.00148	0.001055804185903839
5HT1B_HUMAN	393144	Bronchial disorders (excl neoplasms)	80293	5509	1.19887	0.0	0.0
5HT1B_HUMAN	393144	Cardiac and vascular disorders congenital	14353	1232	1.5281	0.0	0.0
5HT1B_HUMAN	393144	Cardiac and vascular investigations (excl enzyme tests)	186678	16717	1.60073	0.0	0.0
5HT1B_HUMAN	393144	Cardiac arrhythmias	218674	23683	1.97665	0.0	0.0
5HT1B_HUMAN	393144	Cardiac disorder signs and symptoms	542853	34652	1.10969	0.0	0.0
5HT1B_HUMAN	393144	Cardiac neoplasms	331	28	1.5039200000000001	0.044539999999999996	0.026124434155047983
5HT1B_HUMAN	393144	Cardiac therapeutic procedures	10242	388	0.64081	0.0	0.0
5HT1B_HUMAN	393144	Cardiac valve disorders	19057	2163	2.0836799999999998	0.0	0.0
5HT1B_HUMAN	393144	Central nervous system infections and inflammations	19686	1065	0.9308	0.02277	0.013992987377279102
5HT1B_HUMAN	393144	Central nervous system vascular disorders	172365	9010	0.89764	0.0	0.0
5HT1B_HUMAN	393144	Cervix disorders (excl infections and inflammations)	4159	219	0.9046	0.15325999999999998	0.08082684715172024
5HT1B_HUMAN	393144	Changes in physical activity	34687	6368	3.6596	0.0	0.0
5HT1B_HUMAN	393144	Chemical injury and poisoning	123001	9878	1.4211	0.0	0.0
5HT1B_HUMAN	393144	Chlamydial infectious disorders	522	24	0.7843100000000001	0.30134	0.14684191071783548
5HT1B_HUMAN	393144	Chromosomal abnormalities and abnormal gene carriers	2430	144	1.0251700000000001	0.7610100000000001	0.3206686535129083
5HT1B_HUMAN	393144	Coagulopathies and bleeding diatheses (excl thrombocytopenic)	42323	2486	1.0156	0.45224	0.20786268895724486
5HT1B_HUMAN	393144	Cognitive and attention disorders and disturbances	66027	7583	2.11159	0.0	0.0
5HT1B_HUMAN	393144	Communication disorders and disturbances	72637	8247	2.08442	0.0	0.0
5HT1B_HUMAN	393144	Congenital and hereditary disorders NEC	10074	945	1.68468	0.0	0.0
5HT1B_HUMAN	393144	Congenital and peripartum neurological conditions	4994	395	1.3977899999999999	0.0	0.0
5HT1B_HUMAN	393144	Congenital cardiac disorders	6451	467	1.27009	0.0	0.0
5HT1B_HUMAN	393144	Congenital ear disorders (excl deafness)	1075	65	1.0473700000000001	0.69511	0.2985381326236836
5HT1B_HUMAN	393144	Congenital eye disorders (excl glaucoma)	886	44	0.85045	0.34898	0.16653418286279503
5HT1B_HUMAN	393144	Congenital reproductive tract and breast disorders	1844	148	1.42018	0.0001	7.937063549013775e-05
5HT1B_HUMAN	393144	Congenital respiratory tract disorders	1190	75	1.0947	0.45588999999999996	0.20926673279653424
5HT1B_HUMAN	393144	Connective tissue disorders (excl congenital)	21636	988	0.77873	0.0	0.0
5HT1B_HUMAN	393144	Cornification and dystrophic skin disorders	9417	597	1.1015700000000002	0.02295	0.014096727006765406
5HT1B_HUMAN	393144	Coronary artery disorders	278562	15722	0.9734700000000001	0.0008	0.0005869695351809608
5HT1B_HUMAN	393144	Cranial nerve disorders (excl neoplasms)	52382	3175	1.05009	0.00765	0.005027279050558623
5HT1B_HUMAN	393144	Cutaneous neoplasms benign	5790	383	1.15279	0.00812	0.005319225463501304
5HT1B_HUMAN	393144	Cytogenetic investigations	573	15	0.43749	0.00045	0.00033768243041996227
5HT1B_HUMAN	393144	Cytoplasmic disorders congenital	378	17	0.76639	0.32189	0.15550738509558282
5HT1B_HUMAN	393144	Decreased and nonspecific blood pressure disorders and shock	378305	28912	1.3467	0.0	0.0
5HT1B_HUMAN	393144	Deliria (incl confusion)	90586	12168	2.52529	0.0	0.0
5HT1B_HUMAN	393144	Dementia and amnestic conditions	87697	8256	1.69135	0.0	0.0
5HT1B_HUMAN	393144	Demyelinating disorders	52603	1824	0.5845899999999999	0.0	0.0
5HT1B_HUMAN	393144	Dental and gingival conditions	47772	2973	1.0800299999999998	5e-05	4.057040105205715e-05
5HT1B_HUMAN	393144	Depressed mood disorders and disturbances	141290	15433	1.99563	0.0	0.0
5HT1B_HUMAN	393144	Developmental disorders NEC	2757	356	2.41305	0.0	0.0
5HT1B_HUMAN	393144	Diabetic complications	17966	4833	5.98909	0.0	0.0
5HT1B_HUMAN	393144	Dissociative disorders	2897	448	2.97713	0.0	0.0
5HT1B_HUMAN	393144	Disturbances in thinking and perception	62652	12270	3.96348	0.0	0.0
5HT1B_HUMAN	393144	Diverticular disorders	15412	1082	1.22882	0.0	0.0
5HT1B_HUMAN	393144	Ear and labyrinthine disorders congenital	1154	74	1.11511	0.34478000000000003	0.16485692897321405
5HT1B_HUMAN	393144	Eating disorders and disturbances	34169	4213	2.28884	0.0	0.0
5HT1B_HUMAN	393144	Economic and housing issues	11788	960	1.44288	0.0	0.0
5HT1B_HUMAN	393144	Ectoparasitic disorders	616	46	1.31338	0.08358	0.04668986160640047
5HT1B_HUMAN	393144	Electrolyte and fluid balance conditions	261572	20795	1.40557	0.0	0.0
5HT1B_HUMAN	393144	Embolism and thrombosis	148186	10127	1.1937799999999998	0.0	0.0
5HT1B_HUMAN	393144	Encephalopathies	21467	2273	1.92727	0.0	0.0
5HT1B_HUMAN	393144	Endocardial disorders	3205	227	1.24054	0.00217	0.0015197204849046408
5HT1B_HUMAN	393144	Endocrine and glandular disorders NEC	616	163	5.85595	0.0	0.0
5HT1B_HUMAN	393144	Endocrine disorders congenital	383	51	2.5	0.0	0.0
5HT1B_HUMAN	393144	Endocrine disorders of gonadal function	47601	1811	0.64366	0.0	0.0
5HT1B_HUMAN	393144	Endocrine gland therapeutic procedures	1573	82	0.89504	0.35849000000000003	0.17046698402545862
5HT1B_HUMAN	393144	Endocrine investigations (incl sex hormones)	25080	2183	1.55161	0.0	0.0
5HT1B_HUMAN	393144	Endocrine neoplasms benign	2304	301	2.44565	0.0	0.0
5HT1B_HUMAN	393144	Endocrine neoplasms malignant and unspecified	9017	690	1.34855	0.0	0.0
5HT1B_HUMAN	393144	Environmental issues	573	30	0.8991399999999999	0.65436	0.2840849136981974
5HT1B_HUMAN	393144	Enzyme investigations NEC	43698	5365	2.27774	0.0	0.0
5HT1B_HUMAN	393144	Epidermal and dermal conditions	666415	30948	0.79259	0.0	0.0
5HT1B_HUMAN	393144	Exocrine pancreas conditions	41247	7120	3.3953900000000004	0.0	0.0
5HT1B_HUMAN	393144	External ear disorders (excl congenital)	2702	238	1.57197	0.0	0.0
5HT1B_HUMAN	393144	Eye disorders NEC	66383	3184	0.8199200000000001	0.0	0.0
5HT1B_HUMAN	393144	Eye disorders congenital	1921	100	0.89371	0.30456	0.14815867328878066
5HT1B_HUMAN	393144	Eye therapeutic procedures	5660	215	0.64261	0.0	0.0
5HT1B_HUMAN	393144	Family issues	5040	397	1.39155	0.0	0.0
5HT1B_HUMAN	393144	Fatal outcomes	307071	15791	0.88228	0.0	0.0
5HT1B_HUMAN	393144	Female reproductive tract infections and inflammations	8399	448	0.91699	0.07559	0.042628678550776906
5HT1B_HUMAN	393144	Foetal and neonatal investigations	1607	91	0.9769	0.87272	0.3593772030981848
5HT1B_HUMAN	393144	Foetal complications	14238	1059	1.30774	0.0	0.0
5HT1B_HUMAN	393144	Food intolerance syndromes	8964	551	1.06588	0.14751	0.07812007777466368
5HT1B_HUMAN	393144	Fractures	96081	5896	1.06397	0.0	0.0
5HT1B_HUMAN	393144	Fungal infectious disorders	46404	2515	0.9325899999999999	0.00058	0.00043069894629976834
5HT1B_HUMAN	393144	Gallbladder disorders	36730	3398	1.6590900000000002	0.0	0.0
5HT1B_HUMAN	393144	Gastrointestinal conditions NEC	58886	3471	1.01938	0.27183	0.13433175146291232
5HT1B_HUMAN	393144	Gastrointestinal haemorrhages NEC	104328	5841	0.9652	0.008	0.005244479780275379
5HT1B_HUMAN	393144	Gastrointestinal infections	49172	2946	1.03718	0.05501	0.03177581693935129
5HT1B_HUMAN	393144	Gastrointestinal inflammatory conditions	71493	4972	1.21641	0.0	0.0
5HT1B_HUMAN	393144	Gastrointestinal investigations	10977	894	1.44296	0.0	0.0
5HT1B_HUMAN	393144	Gastrointestinal motility and defaecation conditions	305542	20851	1.1919600000000001	0.0	0.0
5HT1B_HUMAN	393144	Gastrointestinal neoplasms benign	8328	552	1.15529	0.0012900000000000001	0.0009257152351414648
5HT1B_HUMAN	393144	Gastrointestinal neoplasms malignant and unspecified	30233	1616	0.9190200000000001	0.00086	0.0006292818303564225
5HT1B_HUMAN	393144	Gastrointestinal signs and symptoms	677692	46122	1.18849	0.0	0.0
5HT1B_HUMAN	393144	Gastrointestinal stenosis and obstruction	31359	2935	1.6804700000000001	0.0	0.0
5HT1B_HUMAN	393144	Gastrointestinal therapeutic procedures	16874	1134	1.17251	0.0	0.0
5HT1B_HUMAN	393144	Gastrointestinal tract disorders congenital	5083	501	1.77947	0.0	0.0
5HT1B_HUMAN	393144	Gastrointestinal ulceration and perforation	41810	2698	1.1226399999999999	0.0	0.0
5HT1B_HUMAN	393144	Gastrointestinal vascular conditions	17715	1591	1.60585	0.0	0.0
5HT1B_HUMAN	393144	Gender related factors	644	93	2.74688	0.0	0.0
5HT1B_HUMAN	393144	General system disorders NEC	1483087	93182	1.0910799999999998	0.0	0.0
5HT1B_HUMAN	393144	Genitourinary tract disorders NEC	66124	5486	1.47238	0.0	0.0
5HT1B_HUMAN	393144	Glaucoma and ocular hypertension	9263	653	1.2342899999999999	0.0	0.0
5HT1B_HUMAN	393144	Glucose metabolism disorders (incl diabetes mellitus)	103625	21276	4.20474	0.0	0.0
5HT1B_HUMAN	393144	Gonadotrophin and sex hormone changes	291	41	2.66902	0.0	0.0
5HT1B_HUMAN	393144	Haematological and lymphoid tissue therapeutic procedures	24446	1206	0.84454	0.0	0.0
5HT1B_HUMAN	393144	Haematological disorders NEC	10574	587	0.9565600000000001	0.30719	0.14920520839469414
5HT1B_HUMAN	393144	Haematology investigations (incl blood groups)	191896	18362	1.7220400000000002	0.0	0.0
5HT1B_HUMAN	393144	Haematopoietic neoplasms (excl leukaemias and lymphomas)	7665	299	0.66061	0.0	0.0
5HT1B_HUMAN	393144	Haemoglobinopathies	2301	83	0.60901	0.0	0.0
5HT1B_HUMAN	393144	Haemolyses and related conditions	29699	1785	1.0407	0.10286	0.05647508701837223
5HT1B_HUMAN	393144	Head and neck therapeutic procedures	13635	791	1.00227	0.9414799999999999	0.3842204924228789
5HT1B_HUMAN	393144	Headaches	258675	18293	1.2384899999999999	0.0	0.0
5HT1B_HUMAN	393144	Hearing disorders	28721	1544	0.9246	0.00248	0.0017256442320232608
5HT1B_HUMAN	393144	Heart failures	230830	13717	1.02821	0.00135	0.0009666456145890898
5HT1B_HUMAN	393144	Helminthic disorders	741	33	0.75856	0.13435999999999998	0.0719996927748926
5HT1B_HUMAN	393144	Hepatic and biliary neoplasms benign	3244	278	1.52539	0.0	0.0
5HT1B_HUMAN	393144	Hepatic and hepatobiliary disorders	160023	11895	1.3068799999999998	0.0	0.0
5HT1B_HUMAN	393144	Hepatobiliary disorders congenital	190	15	1.39496	0.21198000000000003	0.10787816524056672
5HT1B_HUMAN	393144	Hepatobiliary investigations	97697	8508	1.55247	0.0	0.0
5HT1B_HUMAN	393144	Hepatobiliary neoplasms	12957	827	1.10956	0.00421	0.0028522012578616356
5HT1B_HUMAN	393144	Hepatobiliary neoplasms malignant and unspecified	5969	325	0.93714	0.26736	0.13242510061763116
5HT1B_HUMAN	393144	Hepatobiliary therapeutic procedures	11256	809	1.26027	0.0	0.0
5HT1B_HUMAN	393144	Hypothalamus and pituitary gland disorders	15821	2610	3.21524	0.0	0.0
5HT1B_HUMAN	393144	Immune disorders NEC	75386	3148	0.70921	0.0	0.0
5HT1B_HUMAN	393144	Immune system disorders congenital	214	12	0.9668	1.0	0.39291113796942484
5HT1B_HUMAN	393144	Immunodeficiency syndromes	11416	520	0.77668	0.0	0.0
5HT1B_HUMAN	393144	Immunology and allergy investigations	18435	920	0.8548399999999999	0.0	0.0
5HT1B_HUMAN	393144	Impulse control disorders NEC	5185	2664	17.19766	0.0	0.0
5HT1B_HUMAN	393144	Inborn errors of metabolism	1799	118	1.14241	0.15761	0.08292039304628271
5HT1B_HUMAN	393144	Increased intracranial pressure and hydrocephalus	13127	1003	1.34637	0.0	0.0
5HT1B_HUMAN	393144	Infections - pathogen unspecified	549473	33145	1.04472	0.0	0.0
5HT1B_HUMAN	393144	Infections and infestations congenital	176	7	0.67409	0.4169	0.19381255766273706
5HT1B_HUMAN	393144	Injuries NEC	358480	26740	1.3118100000000001	0.0	0.0
5HT1B_HUMAN	393144	Injuries by physical agents	19040	2042	1.9550900000000002	0.0	0.0
5HT1B_HUMAN	393144	Inner ear and VIIIth cranial nerve disorders	43066	2894	1.17242	0.0	0.0
5HT1B_HUMAN	393144	Investigations, imaging and histopathology procedures NEC	28460	1595	0.9662299999999999	0.18592999999999998	0.09618019687913491
5HT1B_HUMAN	393144	Iron and trace metal metabolism disorders	6559	611	1.6717799999999998	0.0	0.0
5HT1B_HUMAN	393144	Joint disorders	266568	12144	0.7768	0.0	0.0
5HT1B_HUMAN	393144	Legal issues	6758	901	2.50356	0.0	0.0
5HT1B_HUMAN	393144	Leukaemias	24571	920	0.6330600000000001	0.0	0.0
5HT1B_HUMAN	393144	Lifestyle issues	87109	9004	1.8761400000000001	0.0	0.0
5HT1B_HUMAN	393144	Lipid analyses	35100	5398	2.95771	0.0	0.0
5HT1B_HUMAN	393144	Lipid metabolism disorders	26032	3981	2.93814	0.0	0.0
5HT1B_HUMAN	393144	Lower respiratory tract disorders (excl obstruction and infection)	95545	7495	1.38532	0.0	0.0
5HT1B_HUMAN	393144	Lymphatic vessel disorders	3609	273	1.33182	1e-05	8.460741970690573e-06
5HT1B_HUMAN	393144	Lymphomas Hodgkin's disease	1741	110	1.09761	0.32974000000000003	0.15886146360637626
5HT1B_HUMAN	393144	Lymphomas NEC	6822	330	0.82726	0.00061	0.0004522692345420658
5HT1B_HUMAN	393144	Lymphomas non-Hodgkin's B-cell	4770	243	0.8735799999999999	0.0406	0.023993770931884227
5HT1B_HUMAN	393144	Lymphomas non-Hodgkin's T-cell	1988	41	0.34271	0.0	0.0
5HT1B_HUMAN	393144	Lymphomas non-Hodgkin's unspecified histology	2851	201	1.23441	0.00495	0.0033234510326449035
5HT1B_HUMAN	393144	Malabsorption conditions	9598	507	0.9076200000000001	0.03385	0.02025541979495164
5HT1B_HUMAN	393144	Male genital tract therapeutic procedures	1263	53	0.71285	0.01341	0.008522608311786592
5HT1B_HUMAN	393144	Male reproductive tract infections and inflammations	3281	216	1.14691	0.056389999999999996	0.03251022107524694
5HT1B_HUMAN	393144	Malignant and unspecified neoplasms gastrointestinal NEC	32935	1794	0.9375600000000001	0.007520000000000001	0.004945144497774169
5HT1B_HUMAN	393144	Manic and bipolar mood disorders and disturbances	15716	5563	8.91708	0.0	0.0
5HT1B_HUMAN	393144	Maternal complications of labour and delivery	9293	673	1.27062	0.0	0.0
5HT1B_HUMAN	393144	Maternal complications of pregnancy	11186	1018	1.62937	0.0	0.0
5HT1B_HUMAN	393144	Medication errors	467421	35716	1.34643	0.0	0.0
5HT1B_HUMAN	393144	Menopause and related conditions	26771	1438	0.9238	0.00318	0.002187182928771299
5HT1B_HUMAN	393144	Menstrual cycle and uterine bleeding disorders	63922	1813	0.47506000000000004	0.0	0.0
5HT1B_HUMAN	393144	Mental impairment disorders	130571	13661	1.90169	0.0	0.0
5HT1B_HUMAN	393144	Mesotheliomas	357	19	0.91484	0.8204899999999999	0.341146789705788
5HT1B_HUMAN	393144	Metabolic and nutritional disorders congenital	2184	164	1.3213	0.00095	0.0006917994090821505
5HT1B_HUMAN	393144	Metabolic, nutritional and blood gas investigations	148134	8716	1.0174299999999998	0.11399000000000001	0.061981541431363384
5HT1B_HUMAN	393144	Metabolism disorders NEC	35688	4277	2.21598	0.0	0.0
5HT1B_HUMAN	393144	Metastases	22915	1495	1.1358700000000002	0.0	0.0
5HT1B_HUMAN	393144	Microbiology and serology investigations	19878	1034	0.8930100000000001	0.00033	0.0002506070298240032
5HT1B_HUMAN	393144	Middle ear disorders (excl congenital)	4329	358	1.4672100000000001	0.0	0.0
5HT1B_HUMAN	393144	Miscellaneous and site unspecified neoplasms benign	11196	808	1.26586	0.0	0.0
5HT1B_HUMAN	393144	Miscellaneous and site unspecified neoplasms malignant and unspecified	62091	3391	0.94015	0.00041	0.00030892113942032113
5HT1B_HUMAN	393144	Mood disorders and disturbances NEC	137071	14709	1.9563400000000002	0.0	0.0
5HT1B_HUMAN	393144	Movement disorders (incl parkinsonism)	180506	29209	3.1419099999999998	0.0	0.0
5HT1B_HUMAN	393144	Muscle disorders	305176	23776	1.37506	0.0	0.0
5HT1B_HUMAN	393144	Musculoskeletal and connective tissue deformities (incl intervertebral disc disorders)	36240	2822	1.3743100000000001	0.0	0.0
5HT1B_HUMAN	393144	Musculoskeletal and connective tissue disorders NEC	339812	20082	1.02219	0.00203	0.0014257251707422837
5HT1B_HUMAN	393144	Musculoskeletal and connective tissue disorders congenital	9356	762	1.443	0.0	0.0
5HT1B_HUMAN	393144	Musculoskeletal and connective tissue neoplasms	12171	903	1.30421	0.0	0.0
5HT1B_HUMAN	393144	Musculoskeletal and soft tissue investigations (excl enzyme tests)	9375	568	1.04961	0.25913	0.12887444892856362
5HT1B_HUMAN	393144	Mycobacterial infectious disorders	12129	329	0.45376000000000005	0.0	0.0
5HT1B_HUMAN	393144	Mycoplasmal infectious disorders	604	51	1.5009	0.00861	0.005620282407807237
5HT1B_HUMAN	393144	Myocardial disorders	41763	5014	2.22048	0.0	0.0
5HT1B_HUMAN	393144	Neonatal and perinatal conditions	30239	2663	1.57162	0.0	0.0
5HT1B_HUMAN	393144	Neonatal respiratory disorders	5798	716	2.29291	0.0	0.0
5HT1B_HUMAN	393144	Neoplasm related morbidities	10712	732	1.1936799999999999	1e-05	8.460741970690573e-06
5HT1B_HUMAN	393144	Neoplastic and ectopic endocrinopathies	2311	211	1.6352	0.0	0.0
5HT1B_HUMAN	393144	Nephropathies	22120	1196	0.93024	0.0148	0.00935168800769113
5HT1B_HUMAN	393144	Nervous system neoplasms benign	2453	263	1.95443	0.0	0.0
5HT1B_HUMAN	393144	Nervous system neoplasms malignant and unspecified NEC	8242	595	1.26629	0.0	0.0
5HT1B_HUMAN	393144	Nervous system, skull and spine therapeutic procedures	6643	482	1.27322	0.0	0.0
5HT1B_HUMAN	393144	Neurological disorders NEC	938369	84809	1.6170200000000001	0.0	0.0
5HT1B_HUMAN	393144	Neurological disorders congenital	5222	371	1.24466	8e-05	6.395487197567318e-05
5HT1B_HUMAN	393144	Neurological disorders of the eye	119728	8251	1.20456	0.0	0.0
5HT1B_HUMAN	393144	Neurological, special senses and psychiatric investigations	14203	1129	1.4053799999999999	0.0	0.0
5HT1B_HUMAN	393144	Neuromuscular disorders	109514	13692	2.3254599999999996	0.0	0.0
5HT1B_HUMAN	393144	Obstetric and gynaecological therapeutic procedures	21059	1388	1.14834	0.0	0.0
5HT1B_HUMAN	393144	Ocular haemorrhages and vascular disorders NEC	10897	417	0.64756	0.0	0.0
5HT1B_HUMAN	393144	Ocular infections, irritations and inflammations	73378	2649	0.60953	0.0	0.0
5HT1B_HUMAN	393144	Ocular injuries	3510	193	0.9469299999999999	0.49208999999999997	0.22333813543631748
5HT1B_HUMAN	393144	Ocular neoplasms	834	39	0.79837	0.18195	0.09433119362546158
5HT1B_HUMAN	393144	Ocular neuromuscular disorders	27471	3432	2.32348	0.0	0.0
5HT1B_HUMAN	393144	Ocular sensory symptoms NEC	13075	897	1.19874	0.0	0.0
5HT1B_HUMAN	393144	Ocular structural change, deposit and degeneration NEC	23238	1122	0.82565	0.0	0.0
5HT1B_HUMAN	393144	Oral soft tissue conditions	152627	8823	0.99851	0.89855	0.36854296205519654
5HT1B_HUMAN	393144	Ovarian and fallopian tube disorders	13507	727	0.92579	0.0425	0.02502856883140494
5HT1B_HUMAN	393144	Parathyroid gland disorders	8837	683	1.36319	0.0	0.0
5HT1B_HUMAN	393144	Penile and scrotal disorders (excl infections and inflammations)	7478	316	0.71806	0.0	0.0
5HT1B_HUMAN	393144	Pericardial disorders	14148	1244	1.56893	0.0	0.0
5HT1B_HUMAN	393144	Peripheral neuropathies	53974	5011	1.6655799999999998	0.0	0.0
5HT1B_HUMAN	393144	Peritoneal and retroperitoneal conditions	33282	1859	0.96281	0.11223	0.061102940117172495
5HT1B_HUMAN	393144	Personality disorders and disturbances in behaviour	71406	10903	2.93276	0.0	0.0
5HT1B_HUMAN	393144	Physical examination topics	207297	23812	2.11205	0.0	0.0
5HT1B_HUMAN	393144	Pigmentation disorders	7098	334	0.80362	5.9999999999999995e-05	4.840172901435508e-05
5HT1B_HUMAN	393144	Placental, amniotic and cavity disorders (excl haemorrhages)	4396	309	1.23044	0.00061	0.0004522692345420658
5HT1B_HUMAN	393144	Plasma cell neoplasms	16095	855	0.91304	0.00926	0.006019494434768897
5HT1B_HUMAN	393144	Platelet disorders	51325	3854	1.3212700000000002	0.0	0.0
5HT1B_HUMAN	393144	Pleural disorders	38350	2971	1.36667	0.0	0.0
5HT1B_HUMAN	393144	Postpartum and puerperal disorders	2081	262	2.3441	0.0	0.0
5HT1B_HUMAN	393144	Pregnancy, labour, delivery and postpartum conditions	62379	3792	1.05336	0.00199	0.00139914885040542
5HT1B_HUMAN	393144	Procedural and device related injuries and complications NEC	236255	9118	0.6533100000000001	0.0	0.0
5HT1B_HUMAN	393144	Product quality issues	147837	6150	0.7064	0.0	0.0
5HT1B_HUMAN	393144	Prostatic disorders (excl infections and inflammations)	14623	682	0.7961600000000001	0.0	0.0
5HT1B_HUMAN	393144	Protein and amino acid metabolism disorders NEC	7094	675	1.71137	0.0	0.0
5HT1B_HUMAN	393144	Protein and chemistry analyses NEC	21380	2443	2.09952	0.0	0.0
5HT1B_HUMAN	393144	Protozoal infectious disorders	2491	65	0.43604	0.0	0.0
5HT1B_HUMAN	393144	Psychiatric and behavioural symptoms NEC	45982	6494	2.6764200000000002	0.0	0.0
5HT1B_HUMAN	393144	Psychiatric disorders NEC	182062	22526	2.29791	0.0	0.0
5HT1B_HUMAN	393144	Psychiatric therapeutic procedures	163	42	5.649	0.0	0.0
5HT1B_HUMAN	393144	Pulmonary vascular disorders	69879	5594	1.41619	0.0	0.0
5HT1B_HUMAN	393144	Purine and pyrimidine metabolism disorders	9204	404	0.74715	0.0	0.0
5HT1B_HUMAN	393144	Red blood cell disorders	2744	286	1.89362	0.0	0.0
5HT1B_HUMAN	393144	Renal and urinary tract disorders congenital	2883	219	1.33788	5.9999999999999995e-05	4.840172901435508e-05
5HT1B_HUMAN	393144	Renal and urinary tract investigations and urinalyses	62571	4509	1.26385	0.0	0.0
5HT1B_HUMAN	393144	Renal and urinary tract neoplasms benign	4296	385	1.60207	0.0	0.0
5HT1B_HUMAN	393144	Renal and urinary tract neoplasms malignant and unspecified	22349	626	0.46898999999999996	0.0	0.0
5HT1B_HUMAN	393144	Renal and urinary tract therapeutic procedures	4374	223	0.8743	0.051910000000000005	0.03011171087049674
5HT1B_HUMAN	393144	Renal disorders (excl nephropathies)	225563	14739	1.1377700000000002	0.0	0.0
5HT1B_HUMAN	393144	Reproductive and genitourinary neoplasms gender unspecified NEC	82	6	1.28483	0.47808	0.21782652989460782
5HT1B_HUMAN	393144	Reproductive neoplasms female benign	11166	627	0.9682200000000001	0.44098999999999994	0.20349932841516152
5HT1B_HUMAN	393144	Reproductive neoplasms female malignant and unspecified	9156	457	0.85498	0.0009199999999999999	0.0006710036427382454
5HT1B_HUMAN	393144	Reproductive neoplasms male benign	276	14	0.8696299999999999	0.69973	0.30007617566123557
5HT1B_HUMAN	393144	Reproductive neoplasms male malignant and unspecified	9477	367	0.65563	0.0	0.0
5HT1B_HUMAN	393144	Reproductive organ and breast investigations (excl hormone analyses)	3355	135	0.6823199999999999	1e-05	8.460741970690573e-06
5HT1B_HUMAN	393144	Reproductive tract and breast disorders congenital	2630	189	1.26009	0.00299	0.0020636066871104956
5HT1B_HUMAN	393144	Reproductive tract disorders NEC	24102	909	0.63784	0.0	0.0
5HT1B_HUMAN	393144	Respiratory and mediastinal neoplasms benign (excl mesotheliomas)	1520	103	1.18297	0.09941	0.054760206250683244
5HT1B_HUMAN	393144	Respiratory and mediastinal neoplasms malignant and unspecified	23789	1716	1.26521	0.0	0.0
5HT1B_HUMAN	393144	Respiratory and pulmonary investigations (excl blood gases)	7246	510	1.23219	1e-05	8.460741970690573e-06
5HT1B_HUMAN	393144	Respiratory disorders NEC	618843	42126	1.18876	0.0	0.0
5HT1B_HUMAN	393144	Respiratory disorders congenital	2995	170	0.97935	0.84483	0.3494902235337581
5HT1B_HUMAN	393144	Respiratory tract infections	317629	18924	1.03105	2.9999999999999997e-05	2.4708510406450908e-05
5HT1B_HUMAN	393144	Respiratory tract neoplasms	27308	1956	1.2556399999999999	0.0	0.0
5HT1B_HUMAN	393144	Respiratory tract therapeutic procedures	5830	471	1.43036	0.0	0.0
5HT1B_HUMAN	393144	Retina, choroid and vitreous haemorrhages and vascular disorders	11953	596	0.85406	0.00013000000000000002	0.0001022796273485887
5HT1B_HUMAN	393144	Rickettsial infectious disorders	359	18	0.8590700000000001	0.65035	0.2825306303285755
5HT1B_HUMAN	393144	Salivary gland conditions	44406	4407	1.79309	0.0	0.0
5HT1B_HUMAN	393144	Schizophrenia and other psychotic disorders	20418	7740	9.93569	0.0	0.0
5HT1B_HUMAN	393144	Seizures (incl subtypes)	107497	10968	1.84917	0.0	0.0
5HT1B_HUMAN	393144	Sexual dysfunctions, disturbances and gender identity disorders	30237	2996	1.7898900000000002	0.0	0.0
5HT1B_HUMAN	393144	Sexual function and fertility disorders	33222	2902	1.55767	0.0	0.0
5HT1B_HUMAN	393144	Skeletal neoplasms benign	945	70	1.30196	0.036489999999999995	0.021729507389485984
5HT1B_HUMAN	393144	Skeletal neoplasms malignant and unspecified	2424	158	1.13476	0.12772999999999998	0.06876946866671019
5HT1B_HUMAN	393144	Skin and subcutaneous tissue disorders NEC	39119	1943	0.85059	0.0	0.0
5HT1B_HUMAN	393144	Skin and subcutaneous tissue disorders congenital	1516	89	1.01502	0.8689399999999999	0.35802056919617503
5HT1B_HUMAN	393144	Skin and subcutaneous tissue infections and infestations	67121	4082	1.0538299999999998	0.0012	0.0008637821021554871
5HT1B_HUMAN	393144	Skin and subcutaneous tissue therapeutic procedures	1668	118	1.23896	0.02752	0.016684919786096257
5HT1B_HUMAN	393144	Skin appendage conditions	152879	10380	1.1854799999999999	0.0	0.0
5HT1B_HUMAN	393144	Skin investigations	274	16	1.0092700000000001	0.8972700000000001	0.3680629053412329
5HT1B_HUMAN	393144	Skin neoplasms malignant and unspecified	17465	745	0.72515	0.0	0.0
5HT1B_HUMAN	393144	Skin vascular abnormalities	90266	4172	0.78864	0.0	0.0
5HT1B_HUMAN	393144	Sleep disorders and disturbances	263347	32968	2.3289400000000002	0.0	0.0
5HT1B_HUMAN	393144	Sleep disturbances (incl subtypes)	163046	19492	2.20978	0.0	0.0
5HT1B_HUMAN	393144	Soft tissue neoplasms benign	3879	277	1.2515399999999999	0.00045	0.00033768243041996227
5HT1B_HUMAN	393144	Soft tissue neoplasms malignant and unspecified (excl sarcomas)	179	7	0.66233	0.33826	0.1623530575958343
5HT1B_HUMAN	393144	Soft tissue sarcomas	2342	86	0.62039	0.0	0.0
5HT1B_HUMAN	393144	Soft tissue therapeutic procedures	853	55	1.12168	0.41928999999999994	0.1948337670987243
5HT1B_HUMAN	393144	Somatoform and factitious disorders	9613	1033	1.9593900000000002	0.0	0.0
5HT1B_HUMAN	393144	Spinal cord and nerve root disorders	19777	1687	1.51769	0.0	0.0
5HT1B_HUMAN	393144	Spleen, lymphatic and reticuloendothelial system disorders	31984	2266	1.2409299999999999	0.0	0.0
5HT1B_HUMAN	393144	Structural brain disorders	12793	1461	2.09822	0.0	0.0
5HT1B_HUMAN	393144	Suicidal and self-injurious behaviours NEC	110356	19750	3.54746	0.0	0.0
5HT1B_HUMAN	393144	Synovial and bursal disorders	8642	610	1.23599	0.0	0.0
5HT1B_HUMAN	393144	Tendon, ligament and cartilage disorders	31005	1472	0.81116	0.0	0.0
5HT1B_HUMAN	393144	Testicular and epididymal disorders	3796	209	0.94825	0.4868	0.22129047132174576
5HT1B_HUMAN	393144	Therapeutic and nontherapeutic effects (excl toxicity)	684282	44514	1.13235	0.0	0.0
5HT1B_HUMAN	393144	Therapeutic procedures and supportive care NEC	180894	15200	1.49295	0.0	0.0
5HT1B_HUMAN	393144	Thoracic disorders (excl lung and pleura)	13512	1115	1.46375	0.0	0.0
5HT1B_HUMAN	393144	Thyroid gland disorders	31831	2781	1.55798	0.0	0.0
5HT1B_HUMAN	393144	Tissue disorders NEC	48298	2797	1.00041	0.9844	0.39291113796942484
5HT1B_HUMAN	393144	Tongue conditions	74655	5321	1.24898	0.0	0.0
5HT1B_HUMAN	393144	Toxicology and therapeutic drug monitoring	32361	5008	2.97966	0.0	0.0
5HT1B_HUMAN	393144	Upper respiratory tract disorders (excl infections)	101683	5551	0.93975	0.0	0.0
5HT1B_HUMAN	393144	Ureteric disorders	2247	229	1.8468099999999998	0.0	0.0
5HT1B_HUMAN	393144	Urethral disorders (excl calculi)	2892	217	1.32021	0.00015	0.00011729257190151044
5HT1B_HUMAN	393144	Urinary tract signs and symptoms	122022	9963	1.44694	0.0	0.0
5HT1B_HUMAN	393144	Urolithiases	17054	1022	1.03746	0.25054	0.1251851170375104
5HT1B_HUMAN	393144	Uterine, pelvic and broad ligament disorders	25740	1323	0.88181	1e-05	8.460741970690573e-06
5HT1B_HUMAN	393144	Vascular disorders NEC	279434	17553	1.09083	0.0	0.0
5HT1B_HUMAN	393144	Vascular haemorrhagic disorders	417455	19039	0.77771	0.0	0.0
5HT1B_HUMAN	393144	Vascular hypertensive disorders	113157	9720	1.52932	0.0	0.0
5HT1B_HUMAN	393144	Vascular inflammations	15808	864	0.9409200000000001	0.08202999999999999	0.045893810604752144
5HT1B_HUMAN	393144	Vascular injuries	2240	90	0.6812600000000001	0.0002	0.0001549129788723975
5HT1B_HUMAN	393144	Vascular therapeutic procedures	15423	526	0.5746399999999999	0.0	0.0
5HT1B_HUMAN	393144	Venous varices	15997	1289	1.42629	0.0	0.0
5HT1B_HUMAN	393144	Viral infectious disorders	124351	6144	0.8458899999999999	0.0	0.0
5HT1B_HUMAN	393144	Vision disorders	144791	9445	1.1357	0.0	0.0
5HT1B_HUMAN	393144	Vitamin related disorders	8302	727	1.56192	0.0	0.0
5HT1B_HUMAN	393144	Vulvovaginal disorders (excl infections and inflammations)	32718	1097	0.5646	0.0	0.0
5HT1B_HUMAN	393144	Water, electrolyte and mineral investigations	48785	4146	1.51155	0.0	0.0
5HT1B_HUMAN	393144	White blood cell disorders	105036	14082	2.51971	0.0	0.0
5HT1D_HUMAN	374147	Abdominal hernias and other abdominal wall conditions	16184	1017	1.1500700000000001	2e-05	1.6652132005324277e-05
5HT1D_HUMAN	374147	Abortions and stillbirth	27420	1229	0.80483	0.0	0.0
5HT1D_HUMAN	374147	Acid-base disorders	59306	5212	1.65257	0.0	0.0
5HT1D_HUMAN	374147	Adjustment disorders (incl subtypes)	952	151	3.23332	0.0	0.0
5HT1D_HUMAN	374147	Administration site reactions	325762	8174	0.44143999999999994	0.0	0.0
5HT1D_HUMAN	374147	Adrenal gland disorders	8941	520	1.05912	0.20210999999999998	0.1034064419686927
5HT1D_HUMAN	374147	Age related factors	1700	122	1.3260399999999999	0.00343	0.002348091568483897
5HT1D_HUMAN	374147	Allergic conditions	330561	12844	0.6933699999999999	0.0	0.0
5HT1D_HUMAN	374147	Anaemias nonhaemolytic and marrow depression	127438	5925	0.8363200000000001	0.0	0.0
5HT1D_HUMAN	374147	Anal and rectal conditions NEC	13492	424	0.5565	0.0	0.0
5HT1D_HUMAN	374147	Ancillary infectious topics	26835	1307	0.8781399999999999	0.0	0.0
5HT1D_HUMAN	374147	Aneurysms and artery dissections	10593	550	0.9393	0.15954000000000002	0.08383901133282348
5HT1D_HUMAN	374147	Angioedema and urticaria	115947	3790	0.5795899999999999	0.0	0.0
5HT1D_HUMAN	374147	Anterior eye structural change, deposit and degeneration	28519	1223	0.76848	0.0	0.0
5HT1D_HUMAN	374147	Anxiety disorders and symptoms	214467	26367	2.40423	0.0	0.0
5HT1D_HUMAN	374147	Appetite and general nutritional disorders	157395	17172	2.10042	0.0	0.0
5HT1D_HUMAN	374147	Arteriosclerosis, stenosis, vascular insufficiency and necrosis	300539	13317	0.79523	0.0	0.0
5HT1D_HUMAN	374147	Aural disorders NEC	22997	1181	0.9285	0.01277	0.00814932419596558
5HT1D_HUMAN	374147	Autoimmune disorders	73876	2501	0.601	0.0	0.0
5HT1D_HUMAN	374147	Bacterial infectious disorders	115621	5135	0.79715	0.0	0.0
5HT1D_HUMAN	374147	Benign neoplasms gastrointestinal	7492	400	0.9673799999999999	0.54315	0.24236077356764044
5HT1D_HUMAN	374147	Bile duct disorders	9028	581	1.17972	0.00016999999999999999	0.0001324110332508931
5HT1D_HUMAN	374147	Bladder and bladder neck disorders (excl calculi)	39461	1794	0.8169	0.0	0.0
5HT1D_HUMAN	374147	Blood and lymphatic system disorders congenital	3344	137	0.7327	0.00022999999999999998	0.00017727037109424788
5HT1D_HUMAN	374147	Body temperature conditions	172155	12475	1.33997	0.0	0.0
5HT1D_HUMAN	374147	Bone and joint injuries	123309	6799	1.00089	0.93975	0.38356970245166866
5HT1D_HUMAN	374147	Bone and joint therapeutic procedures	30966	1323	0.7655	0.0	0.0
5HT1D_HUMAN	374147	Bone disorders (excl congenital and fractures)	104336	3925	0.67045	0.0	0.0
5HT1D_HUMAN	374147	Bone, calcium, magnesium and phosphorus metabolism disorders	43097	2125	0.88956	0.0	0.0
5HT1D_HUMAN	374147	Breast disorders	78951	10351	2.58799	0.0	0.0
5HT1D_HUMAN	374147	Breast neoplasms benign (incl nipple)	2309	172	1.38048	0.0001	7.937063549013775e-05
5HT1D_HUMAN	374147	Breast neoplasms malignant and unspecified (incl nipple)	49167	1236	0.44228999999999996	0.0	0.0
5HT1D_HUMAN	374147	Breast therapeutic procedures	2104	118	1.01908	0.81126	0.33778447907820136
5HT1D_HUMAN	374147	Bronchial disorders (excl neoplasms)	80293	4567	1.03441	0.02607	0.015857749312588022
5HT1D_HUMAN	374147	Cardiac and vascular disorders congenital	14353	811	1.0271700000000001	0.45278999999999997	0.20805222576281834
5HT1D_HUMAN	374147	Cardiac and vascular investigations (excl enzyme tests)	186678	14114	1.40283	0.0	0.0
5HT1D_HUMAN	374147	Cardiac arrhythmias	218674	20168	1.74259	0.0	0.0
5HT1D_HUMAN	374147	Cardiac disorder signs and symptoms	542853	28455	0.94878	0.0	0.0
5HT1D_HUMAN	374147	Cardiac neoplasms	331	20	1.103	0.62966	0.2746988326174477
5HT1D_HUMAN	374147	Cardiac therapeutic procedures	10242	332	0.5746	0.0	0.0
5HT1D_HUMAN	374147	Cardiac valve disorders	19057	1800	1.7890099999999998	0.0	0.0
5HT1D_HUMAN	374147	Central nervous system infections and inflammations	19686	830	0.75498	0.0	0.0
5HT1D_HUMAN	374147	Central nervous system vascular disorders	172365	7927	0.8268200000000001	0.0	0.0
5HT1D_HUMAN	374147	Cervix disorders (excl infections and inflammations)	4159	186	0.80297	0.00277	0.0019184114475954857
5HT1D_HUMAN	374147	Changes in physical activity	34687	7116	4.42678	0.0	0.0
5HT1D_HUMAN	374147	Chemical injury and poisoning	123001	8565	1.28372	0.0	0.0
5HT1D_HUMAN	374147	Chlamydial infectious disorders	522	20	0.68333	0.1022	0.05614160256798498
5HT1D_HUMAN	374147	Chromosomal abnormalities and abnormal gene carriers	2430	139	1.04063	0.62488	0.2728365819256635
5HT1D_HUMAN	374147	Coagulopathies and bleeding diatheses (excl thrombocytopenic)	42323	1739	0.7349399999999999	0.0	0.0
5HT1D_HUMAN	374147	Cognitive and attention disorders and disturbances	66027	7665	2.25261	0.0	0.0
5HT1D_HUMAN	374147	Communication disorders and disturbances	72637	8155	2.16915	0.0	0.0
5HT1D_HUMAN	374147	Congenital and hereditary disorders NEC	10074	498	0.89197	0.012709999999999999	0.008112975304905942
5HT1D_HUMAN	374147	Congenital and peripartum neurological conditions	4994	391	1.45694	0.0	0.0
5HT1D_HUMAN	374147	Congenital cardiac disorders	6451	300	0.8365299999999999	0.0022199999999999998	0.0015530462549459701
5HT1D_HUMAN	374147	Congenital ear disorders (excl deafness)	1075	49	0.81913	0.18137999999999999	0.09406847928638819
5HT1D_HUMAN	374147	Congenital eye disorders (excl glaucoma)	886	41	0.83221	0.26965	0.13341000087277172
5HT1D_HUMAN	374147	Congenital reproductive tract and breast disorders	1844	114	1.13022	0.2019	0.103305408881668
5HT1D_HUMAN	374147	Congenital respiratory tract disorders	1190	49	0.73657	0.03572	0.02130566936072549
5HT1D_HUMAN	374147	Connective tissue disorders (excl congenital)	21636	839	0.69194	0.0	0.0
5HT1D_HUMAN	374147	Cornification and dystrophic skin disorders	9417	474	0.9090799999999999	0.04425	0.025965084232590637
5HT1D_HUMAN	374147	Coronary artery disorders	278562	13277	0.8584	0.0	0.0
5HT1D_HUMAN	374147	Cranial nerve disorders (excl neoplasms)	52382	2705	0.93394	0.00047000000000000004	0.00035208754903985135
5HT1D_HUMAN	374147	Cutaneous neoplasms benign	5790	301	0.9405399999999999	0.3132	0.15175213013168085
5HT1D_HUMAN	374147	Cytogenetic investigations	573	12	0.36688000000000004	0.0001	7.937063549013775e-05
5HT1D_HUMAN	374147	Cytoplasmic disorders congenital	378	14	0.65968	0.14182	0.07547069315528228
5HT1D_HUMAN	374147	Decreased and nonspecific blood pressure disorders and shock	378305	23406	1.13117	0.0	0.0
5HT1D_HUMAN	374147	Deliria (incl confusion)	90586	11687	2.5406	0.0	0.0
5HT1D_HUMAN	374147	Dementia and amnestic conditions	87697	8080	1.74065	0.0	0.0
5HT1D_HUMAN	374147	Demyelinating disorders	52603	1607	0.5404899999999999	0.0	0.0
5HT1D_HUMAN	374147	Dental and gingival conditions	47772	2390	0.90327	0.0	0.0
5HT1D_HUMAN	374147	Depressed mood disorders and disturbances	141290	14943	2.02851	0.0	0.0
5HT1D_HUMAN	374147	Developmental disorders NEC	2757	408	2.9790799999999997	0.0	0.0
5HT1D_HUMAN	374147	Diabetic complications	17966	4806	6.263730000000001	0.0	0.0
5HT1D_HUMAN	374147	Dissociative disorders	2897	469	3.3130599999999997	0.0	0.0
5HT1D_HUMAN	374147	Disturbances in thinking and perception	62652	13366	4.65139	0.0	0.0
5HT1D_HUMAN	374147	Diverticular disorders	15412	760	0.88965	0.00146	0.0010422497520739212
5HT1D_HUMAN	374147	Ear and labyrinthine disorders congenital	1154	56	0.87476	0.36606	0.17359337240733866
5HT1D_HUMAN	374147	Eating disorders and disturbances	34169	3750	2.11442	0.0	0.0
5HT1D_HUMAN	374147	Economic and housing issues	11788	889	1.39901	0.0	0.0
5HT1D_HUMAN	374147	Ectoparasitic disorders	616	44	1.31935	0.07733999999999999	0.04350980635397154
5HT1D_HUMAN	374147	Electrolyte and fluid balance conditions	261572	15898	1.10991	0.0	0.0
5HT1D_HUMAN	374147	Embolism and thrombosis	148186	7754	0.9470299999999999	0.0	0.0
5HT1D_HUMAN	374147	Encephalopathies	21467	1542	1.3273700000000002	0.0	0.0
5HT1D_HUMAN	374147	Endocardial disorders	3205	159	0.89531	0.18781	0.09706247329044611
5HT1D_HUMAN	374147	Endocrine and glandular disorders NEC	616	177	6.91534	0.0	0.0
5HT1D_HUMAN	374147	Endocrine disorders congenital	383	38	1.88916	0.00047000000000000004	0.00035208754903985135
5HT1D_HUMAN	374147	Endocrine disorders of gonadal function	47601	8086	3.50975	0.0	0.0
5HT1D_HUMAN	374147	Endocrine gland therapeutic procedures	1573	70	0.79881	0.06797	0.03867989484383431
5HT1D_HUMAN	374147	Endocrine investigations (incl sex hormones)	25080	3082	2.403	0.0	0.0
5HT1D_HUMAN	374147	Endocrine neoplasms benign	2304	366	3.23916	0.0	0.0
5HT1D_HUMAN	374147	Endocrine neoplasms malignant and unspecified	9017	561	1.1379	0.0036	0.002458512784989308
5HT1D_HUMAN	374147	Environmental issues	573	28	0.88118	0.5826600000000001	0.25723188575100026
5HT1D_HUMAN	374147	Enzyme investigations NEC	43698	5017	2.2246	0.0	0.0
5HT1D_HUMAN	374147	Epidermal and dermal conditions	666415	24098	0.64348	0.0	0.0
5HT1D_HUMAN	374147	Exocrine pancreas conditions	41247	6624	3.2814099999999997	0.0	0.0
5HT1D_HUMAN	374147	External ear disorders (excl congenital)	2702	188	1.28262	0.00134	0.0009598414190155028
5HT1D_HUMAN	374147	Eye disorders NEC	66383	2674	0.7198899999999999	0.0	0.0
5HT1D_HUMAN	374147	Eye disorders congenital	1921	89	0.83324	0.09862	0.0543659758098827
5HT1D_HUMAN	374147	Eye therapeutic procedures	5660	173	0.54077	0.0	0.0
5HT1D_HUMAN	374147	Family issues	5040	395	1.4585299999999999	0.0	0.0
5HT1D_HUMAN	374147	Fatal outcomes	307071	13675	0.79943	0.0	0.0
5HT1D_HUMAN	374147	Female reproductive tract infections and inflammations	8399	376	0.80381	2e-05	1.6652132005324277e-05
5HT1D_HUMAN	374147	Foetal and neonatal investigations	1607	87	0.9817	0.91295	0.3737055967000185
5HT1D_HUMAN	374147	Foetal complications	14238	867	1.11214	0.0027199999999999998	0.0018855684128464207
5HT1D_HUMAN	374147	Food intolerance syndromes	8964	425	0.8536600000000001	0.00128	0.0009187863055762199
5HT1D_HUMAN	374147	Fractures	96081	5238	0.9889600000000001	0.43767	0.20214726416295353
5HT1D_HUMAN	374147	Fungal infectious disorders	46404	1718	0.65941	0.0	0.0
5HT1D_HUMAN	374147	Gallbladder disorders	36730	2527	1.2672	0.0	0.0
5HT1D_HUMAN	374147	Gastrointestinal conditions NEC	58886	2781	0.8501700000000001	0.0	0.0
5HT1D_HUMAN	374147	Gastrointestinal haemorrhages NEC	104328	4189	0.71748	0.0	0.0
5HT1D_HUMAN	374147	Gastrointestinal infections	49172	2036	0.74085	0.0	0.0
5HT1D_HUMAN	374147	Gastrointestinal inflammatory conditions	71493	3352	0.84372	0.0	0.0
5HT1D_HUMAN	374147	Gastrointestinal investigations	10977	679	1.13089	0.00223	0.001559644983189908
5HT1D_HUMAN	374147	Gastrointestinal motility and defaecation conditions	305542	14925	0.88084	0.0	0.0
5HT1D_HUMAN	374147	Gastrointestinal neoplasms benign	8328	448	0.9751200000000001	0.6307699999999999	0.27513279856111644
5HT1D_HUMAN	374147	Gastrointestinal neoplasms malignant and unspecified	30233	1096	0.6451600000000001	0.0	0.0
5HT1D_HUMAN	374147	Gastrointestinal signs and symptoms	677692	34700	0.92561	0.0	0.0
5HT1D_HUMAN	374147	Gastrointestinal stenosis and obstruction	31359	2212	1.30166	0.0	0.0
5HT1D_HUMAN	374147	Gastrointestinal therapeutic procedures	16874	954	1.0278	0.40784000000000004	0.19013177764642392
5HT1D_HUMAN	374147	Gastrointestinal tract disorders congenital	5083	323	1.1638600000000001	0.00975	0.006319676700111483
5HT1D_HUMAN	374147	Gastrointestinal ulceration and perforation	41810	1979	0.8521799999999999	0.0	0.0
5HT1D_HUMAN	374147	Gastrointestinal vascular conditions	17715	1061	1.0927	0.0056	0.003739159881623699
5HT1D_HUMAN	374147	Gender related factors	644	98	3.07849	0.0	0.0
5HT1D_HUMAN	374147	General system disorders NEC	1483087	79391	0.9700700000000001	0.0	0.0
5HT1D_HUMAN	374147	Genitourinary tract disorders NEC	66124	4484	1.24769	0.0	0.0
5HT1D_HUMAN	374147	Glaucoma and ocular hypertension	9263	608	1.20487	1e-05	8.460741970690573e-06
5HT1D_HUMAN	374147	Glucose metabolism disorders (incl diabetes mellitus)	103625	21179	4.405959999999999	0.0	0.0
5HT1D_HUMAN	374147	Gonadotrophin and sex hormone changes	291	30	1.97145	0.0011099999999999999	0.0008024885218722101
5HT1D_HUMAN	374147	Haematological and lymphoid tissue therapeutic procedures	24446	878	0.6389600000000001	0.0	0.0
5HT1D_HUMAN	374147	Haematological disorders NEC	10574	430	0.72705	0.0	0.0
5HT1D_HUMAN	374147	Haematology investigations (incl blood groups)	191896	15184	1.47375	0.0	0.0
5HT1D_HUMAN	374147	Haematopoietic neoplasms (excl leukaemias and lymphomas)	7665	189	0.43361000000000005	0.0	0.0
5HT1D_HUMAN	374147	Haemoglobinopathies	2301	73	0.56197	0.0	0.0
5HT1D_HUMAN	374147	Haemolyses and related conditions	29699	1108	0.66468	0.0	0.0
5HT1D_HUMAN	374147	Head and neck therapeutic procedures	13635	583	0.76612	0.0	0.0
5HT1D_HUMAN	374147	Headaches	258675	15494	1.0928	0.0	0.0
5HT1D_HUMAN	374147	Hearing disorders	28721	1270	0.79351	0.0	0.0
5HT1D_HUMAN	374147	Heart failures	230830	10644	0.8291299999999999	0.0	0.0
5HT1D_HUMAN	374147	Helminthic disorders	741	26	0.62369	0.015390000000000001	0.009701242650431593
5HT1D_HUMAN	374147	Hepatic and biliary neoplasms benign	3244	213	1.20531	0.00987	0.006393710628937107
5HT1D_HUMAN	374147	Hepatic and hepatobiliary disorders	160023	9159	1.04128	0.00016	0.0001248569634084437
5HT1D_HUMAN	374147	Hepatobiliary disorders congenital	190	12	1.15629	0.63118	0.27529045226130655
5HT1D_HUMAN	374147	Hepatobiliary investigations	97697	7202	1.365	0.0	0.0
5HT1D_HUMAN	374147	Hepatobiliary neoplasms	12957	460	0.6313300000000001	0.0	0.0
5HT1D_HUMAN	374147	Hepatobiliary neoplasms malignant and unspecified	5969	196	0.58232	0.0	0.0
5HT1D_HUMAN	374147	Hepatobiliary therapeutic procedures	11256	608	0.97936	0.63444	0.2765553820053539
5HT1D_HUMAN	374147	Hypothalamus and pituitary gland disorders	15821	6449	11.80225	0.0	0.0
5HT1D_HUMAN	374147	Immune disorders NEC	75386	2089	0.48883000000000004	0.0	0.0
5HT1D_HUMAN	374147	Immune system disorders congenital	214	7	0.58001	0.17701	0.09205210137033427
5HT1D_HUMAN	374147	Immunodeficiency syndromes	11416	387	0.6018399999999999	0.0	0.0
5HT1D_HUMAN	374147	Immunology and allergy investigations	18435	691	0.66793	0.0	0.0
5HT1D_HUMAN	374147	Impulse control disorders NEC	5185	2735	19.1468	0.0	0.0
5HT1D_HUMAN	374147	Inborn errors of metabolism	1799	102	1.03092	0.75641	0.3190861173253213
5HT1D_HUMAN	374147	Increased intracranial pressure and hydrocephalus	13127	895	1.25496	0.0	0.0
5HT1D_HUMAN	374147	Infections - pathogen unspecified	549473	26172	0.8578100000000001	0.0	0.0
5HT1D_HUMAN	374147	Infections and infestations congenital	176	7	0.7104199999999999	0.50643	0.2288626969337625
5HT1D_HUMAN	374147	Injuries NEC	358480	29261	1.52444	0.0	0.0
5HT1D_HUMAN	374147	Injuries by physical agents	19040	1996	2.0086	0.0	0.0
5HT1D_HUMAN	374147	Inner ear and VIIIth cranial nerve disorders	43066	2342	0.9863700000000001	0.5250199999999999	0.23598567810931215
5HT1D_HUMAN	374147	Investigations, imaging and histopathology procedures NEC	28460	1353	0.85609	0.0	0.0
5HT1D_HUMAN	374147	Iron and trace metal metabolism disorders	6559	531	1.5108700000000002	0.0	0.0
5HT1D_HUMAN	374147	Joint disorders	266568	10080	0.67406	0.0	0.0
5HT1D_HUMAN	374147	Legal issues	6758	1071	3.23006	0.0	0.0
5HT1D_HUMAN	374147	Leukaemias	24571	554	0.39564	0.0	0.0
5HT1D_HUMAN	374147	Lifestyle issues	87109	9677	2.14351	0.0	0.0
5HT1D_HUMAN	374147	Lipid analyses	35100	5381	3.1055200000000003	0.0	0.0
5HT1D_HUMAN	374147	Lipid metabolism disorders	26032	3752	2.88837	0.0	0.0
5HT1D_HUMAN	374147	Lower respiratory tract disorders (excl obstruction and infection)	95545	5849	1.1184399999999999	0.0	0.0
5HT1D_HUMAN	374147	Lymphatic vessel disorders	3609	179	0.8950799999999999	0.15463	0.0814702523410089
5HT1D_HUMAN	374147	Lymphomas Hodgkin's disease	1741	77	0.79367	0.045860000000000005	0.026851087728358404
5HT1D_HUMAN	374147	Lymphomas NEC	6822	263	0.68774	0.0	0.0
5HT1D_HUMAN	374147	Lymphomas non-Hodgkin's B-cell	4770	165	0.61455	0.0	0.0
5HT1D_HUMAN	374147	Lymphomas non-Hodgkin's T-cell	1988	29	0.2539	0.0	0.0
5HT1D_HUMAN	374147	Lymphomas non-Hodgkin's unspecified histology	2851	147	0.93243	0.43532	0.2012032593241845
5HT1D_HUMAN	374147	Malabsorption conditions	9598	412	0.76926	0.0	0.0
5HT1D_HUMAN	374147	Male genital tract therapeutic procedures	1263	53	0.75127	0.04155	0.02450665894991481
5HT1D_HUMAN	374147	Male reproductive tract infections and inflammations	3281	187	1.03664	0.61884	0.27052625795257373
5HT1D_HUMAN	374147	Malignant and unspecified neoplasms gastrointestinal NEC	32935	1199	0.648	0.0	0.0
5HT1D_HUMAN	374147	Manic and bipolar mood disorders and disturbances	15716	5846	10.1589	0.0	0.0
5HT1D_HUMAN	374147	Maternal complications of labour and delivery	9293	547	1.07271	0.11127999999999999	0.06062975533276066
5HT1D_HUMAN	374147	Maternal complications of pregnancy	11186	958	1.6065	0.0	0.0
5HT1D_HUMAN	374147	Medication errors	467421	38944	1.5589	0.0	0.0
5HT1D_HUMAN	374147	Menopause and related conditions	26771	1126	0.75308	0.0	0.0
5HT1D_HUMAN	374147	Menstrual cycle and uterine bleeding disorders	63922	2155	0.59841	0.0	0.0
5HT1D_HUMAN	374147	Mental impairment disorders	130571	13713	2.0127	0.0	0.0
5HT1D_HUMAN	374147	Mesotheliomas	357	8	0.39316	0.00492	0.0033045319905213267
5HT1D_HUMAN	374147	Metabolic and nutritional disorders congenital	2184	143	1.20171	0.03883	0.023022441428720848
5HT1D_HUMAN	374147	Metabolic, nutritional and blood gas investigations	148134	7525	0.91791	0.0	0.0
5HT1D_HUMAN	374147	Metabolism disorders NEC	35688	3663	1.9617900000000001	0.0	0.0
5HT1D_HUMAN	374147	Metastases	22915	781	0.6052	0.0	0.0
5HT1D_HUMAN	374147	Microbiology and serology investigations	19878	664	0.59273	0.0	0.0
5HT1D_HUMAN	374147	Middle ear disorders (excl congenital)	4329	271	1.14541	0.0329	0.019718824547839475
5HT1D_HUMAN	374147	Miscellaneous and site unspecified neoplasms benign	11196	705	1.1526	0.00033	0.0002506070298240032
5HT1D_HUMAN	374147	Miscellaneous and site unspecified neoplasms malignant and unspecified	62091	1929	0.54994	0.0	0.0
5HT1D_HUMAN	374147	Mood disorders and disturbances NEC	137071	15473	2.18249	0.0	0.0
5HT1D_HUMAN	374147	Movement disorders (incl parkinsonism)	180506	30988	3.5547199999999997	0.0	0.0
5HT1D_HUMAN	374147	Muscle disorders	305176	21365	1.29116	0.0	0.0
5HT1D_HUMAN	374147	Musculoskeletal and connective tissue deformities (incl intervertebral disc disorders)	36240	2332	1.17959	0.0	0.0
5HT1D_HUMAN	374147	Musculoskeletal and connective tissue disorders NEC	339812	17114	0.9096200000000001	0.0	0.0
5HT1D_HUMAN	374147	Musculoskeletal and connective tissue disorders congenital	9356	600	1.1753	0.00018	0.0001399727359242779
5HT1D_HUMAN	374147	Musculoskeletal and connective tissue neoplasms	12171	558	0.8241299999999999	0.0	0.0
5HT1D_HUMAN	374147	Musculoskeletal and soft tissue investigations (excl enzyme tests)	9375	500	0.96629	0.4686	0.21412028453973886
5HT1D_HUMAN	374147	Mycobacterial infectious disorders	12129	264	0.38163	0.0	0.0
5HT1D_HUMAN	374147	Mycoplasmal infectious disorders	604	33	0.99125	1.0	0.39291113796942484
5HT1D_HUMAN	374147	Myocardial disorders	41763	4131	1.8827900000000002	0.0	0.0
5HT1D_HUMAN	374147	Neonatal and perinatal conditions	30239	2218	1.35763	0.0	0.0
5HT1D_HUMAN	374147	Neonatal respiratory disorders	5798	640	2.12816	0.0	0.0
5HT1D_HUMAN	374147	Neoplasm related morbidities	10712	327	0.5400699999999999	0.0	0.0
5HT1D_HUMAN	374147	Neoplastic and ectopic endocrinopathies	2311	127	0.9973700000000001	1.0	0.39291113796942484
5HT1D_HUMAN	374147	Nephropathies	22120	931	0.75361	0.0	0.0
5HT1D_HUMAN	374147	Nervous system neoplasms benign	2453	257	2.00727	0.0	0.0
5HT1D_HUMAN	374147	Nervous system neoplasms malignant and unspecified NEC	8242	445	0.9789	0.6813600000000001	0.2936394184168013
5HT1D_HUMAN	374147	Nervous system, skull and spine therapeutic procedures	6643	425	1.17231	0.0018	0.0012717528471497344
5HT1D_HUMAN	374147	Neurological disorders NEC	938369	79309	1.58345	0.0	0.0
5HT1D_HUMAN	374147	Neurological disorders congenital	5222	383	1.35753	0.0	0.0
5HT1D_HUMAN	374147	Neurological disorders of the eye	119728	7348	1.1214600000000001	0.0	0.0
5HT1D_HUMAN	374147	Neurological, special senses and psychiatric investigations	14203	1123	1.4725700000000002	0.0	0.0
5HT1D_HUMAN	374147	Neuromuscular disorders	109514	13658	2.4438400000000002	0.0	0.0
5HT1D_HUMAN	374147	Obstetric and gynaecological therapeutic procedures	21059	1219	1.05382	0.07677	0.043220770434005365
5HT1D_HUMAN	374147	Ocular haemorrhages and vascular disorders NEC	10897	334	0.54233	0.0	0.0
5HT1D_HUMAN	374147	Ocular infections, irritations and inflammations	73378	2081	0.50062	0.0	0.0
5HT1D_HUMAN	374147	Ocular injuries	3510	169	0.86759	0.07557	0.04261845958700964
5HT1D_HUMAN	374147	Ocular neoplasms	834	32	0.68435	0.033280000000000004	0.01992906471590234
5HT1D_HUMAN	374147	Ocular neuromuscular disorders	27471	3415	2.43485	0.0	0.0
5HT1D_HUMAN	374147	Ocular sensory symptoms NEC	13075	813	1.13719	0.00047999999999999996	0.000359320579059441
5HT1D_HUMAN	374147	Ocular structural change, deposit and degeneration NEC	23238	886	0.67986	0.0	0.0
5HT1D_HUMAN	374147	Oral soft tissue conditions	152627	6115	0.71586	0.0	0.0
5HT1D_HUMAN	374147	Ovarian and fallopian tube disorders	13507	608	0.80845	0.0	0.0
5HT1D_HUMAN	374147	Parathyroid gland disorders	8837	468	0.9591299999999999	0.38813000000000003	0.18241327654194325
5HT1D_HUMAN	374147	Penile and scrotal disorders (excl infections and inflammations)	7478	269	0.64	0.0	0.0
5HT1D_HUMAN	374147	Pericardial disorders	14148	934	1.21232	0.0	0.0
5HT1D_HUMAN	374147	Peripheral neuropathies	53974	4034	1.38545	0.0	0.0
5HT1D_HUMAN	374147	Peritoneal and retroperitoneal conditions	33282	1000	0.5313100000000001	0.0	0.0
5HT1D_HUMAN	374147	Personality disorders and disturbances in behaviour	71406	12476	3.63115	0.0	0.0
5HT1D_HUMAN	374147	Physical examination topics	207297	24141	2.26068	0.0	0.0
5HT1D_HUMAN	374147	Pigmentation disorders	7098	248	0.6209600000000001	0.0	0.0
5HT1D_HUMAN	374147	Placental, amniotic and cavity disorders (excl haemorrhages)	4396	260	1.0782	0.23396999999999998	0.11784839868718448
5HT1D_HUMAN	374147	Plasma cell neoplasms	16095	336	0.36569	0.0	0.0
5HT1D_HUMAN	374147	Platelet disorders	51325	2455	0.86162	0.0	0.0
5HT1D_HUMAN	374147	Pleural disorders	38350	1932	0.9099	4e-05	3.2663203478793225e-05
5HT1D_HUMAN	374147	Postpartum and puerperal disorders	2081	307	2.96818	0.0	0.0
5HT1D_HUMAN	374147	Pregnancy, labour, delivery and postpartum conditions	62379	3270	0.94885	0.00324	0.0022261040830240135
5HT1D_HUMAN	374147	Procedural and device related injuries and complications NEC	236255	8616	0.64918	0.0	0.0
5HT1D_HUMAN	374147	Product quality issues	147837	6455	0.78308	0.0	0.0
5HT1D_HUMAN	374147	Prostatic disorders (excl infections and inflammations)	14623	570	0.69568	0.0	0.0
5HT1D_HUMAN	374147	Protein and amino acid metabolism disorders NEC	7094	563	1.47854	0.0	0.0
5HT1D_HUMAN	374147	Protein and chemistry analyses NEC	21380	2140	1.90772	0.0	0.0
5HT1D_HUMAN	374147	Protozoal infectious disorders	2491	58	0.40888	0.0	0.0
5HT1D_HUMAN	374147	Psychiatric and behavioural symptoms NEC	45982	6997	3.07836	0.0	0.0
5HT1D_HUMAN	374147	Psychiatric disorders NEC	182062	23035	2.4844	0.0	0.0
5HT1D_HUMAN	374147	Psychiatric therapeutic procedures	163	50	7.5892100000000005	0.0	0.0
5HT1D_HUMAN	374147	Pulmonary vascular disorders	69879	4427	1.16009	0.0	0.0
5HT1D_HUMAN	374147	Purine and pyrimidine metabolism disorders	9204	302	0.58187	0.0	0.0
5HT1D_HUMAN	374147	Red blood cell disorders	2744	241	1.65143	0.0	0.0
5HT1D_HUMAN	374147	Renal and urinary tract disorders congenital	2883	147	0.9215200000000001	0.34791	0.16607425476822027
5HT1D_HUMAN	374147	Renal and urinary tract investigations and urinalyses	62571	3551	1.0319399999999999	0.06846000000000001	0.0389313829987335
5HT1D_HUMAN	374147	Renal and urinary tract neoplasms benign	4296	272	1.15935	0.02093	0.012936128601411944
5HT1D_HUMAN	374147	Renal and urinary tract neoplasms malignant and unspecified	22349	403	0.31496	0.0	0.0
5HT1D_HUMAN	374147	Renal and urinary tract therapeutic procedures	4374	167	0.68085	0.0	0.0
5HT1D_HUMAN	374147	Renal disorders (excl nephropathies)	225563	11100	0.8877200000000001	0.0	0.0
5HT1D_HUMAN	374147	Reproductive and genitourinary neoplasms gender unspecified NEC	82	5	1.11374	0.80611	0.33604589285385983
5HT1D_HUMAN	374147	Reproductive neoplasms female benign	11166	532	0.85806	0.00045	0.00033768243041996227
5HT1D_HUMAN	374147	Reproductive neoplasms female malignant and unspecified	9156	352	0.68575	0.0	0.0
5HT1D_HUMAN	374147	Reproductive neoplasms male benign	276	16	1.05548	0.7915300000000001	0.33111841838240724
5HT1D_HUMAN	374147	Reproductive neoplasms male malignant and unspecified	9477	294	0.5491199999999999	0.0	0.0
5HT1D_HUMAN	374147	Reproductive organ and breast investigations (excl hormone analyses)	3355	141	0.75245	0.00065	0.00048070023808747267
5HT1D_HUMAN	374147	Reproductive tract and breast disorders congenital	2630	147	1.01542	0.83083	0.3447632426546616
5HT1D_HUMAN	374147	Reproductive tract disorders NEC	24102	712	0.5221	0.0	0.0
5HT1D_HUMAN	374147	Respiratory and mediastinal neoplasms benign (excl mesotheliomas)	1520	84	1.0033	0.95516	0.3894441162852378
5HT1D_HUMAN	374147	Respiratory and mediastinal neoplasms malignant and unspecified	23789	1264	0.96247	0.19035	0.09820003754009965
5HT1D_HUMAN	374147	Respiratory and pulmonary investigations (excl blood gases)	7246	378	0.94399	0.29083000000000003	0.14234677567319629
5HT1D_HUMAN	374147	Respiratory disorders NEC	618843	33923	0.99472	0.32189	0.15550738509558282
5HT1D_HUMAN	374147	Respiratory disorders congenital	2995	110	0.65396	0.0	0.0
5HT1D_HUMAN	374147	Respiratory tract infections	317629	15338	0.87026	0.0	0.0
5HT1D_HUMAN	374147	Respiratory tract neoplasms	27308	1370	0.9059200000000001	0.00032	0.00024337967699196675
5HT1D_HUMAN	374147	Respiratory tract therapeutic procedures	5830	376	1.18244	0.0021100000000000003	0.00147925394592422
5HT1D_HUMAN	374147	Retina, choroid and vitreous haemorrhages and vascular disorders	11953	522	0.78323	0.0	0.0
5HT1D_HUMAN	374147	Rickettsial infectious disorders	359	15	0.7478899999999999	0.35289	0.1680905123519032
5HT1D_HUMAN	374147	Salivary gland conditions	44406	4265	1.82237	0.0	0.0
5HT1D_HUMAN	374147	Schizophrenia and other psychotic disorders	20418	9328	14.42653	0.0	0.0
5HT1D_HUMAN	374147	Seizures (incl subtypes)	107497	10343	1.8259599999999998	0.0	0.0
5HT1D_HUMAN	374147	Sexual dysfunctions, disturbances and gender identity disorders	30237	3372	2.1528099999999997	0.0	0.0
5HT1D_HUMAN	374147	Sexual function and fertility disorders	33222	3479	2.0062	0.0	0.0
5HT1D_HUMAN	374147	Skeletal neoplasms benign	945	51	0.97845	0.9431799999999999	0.3848813634052738
5HT1D_HUMAN	374147	Skeletal neoplasms malignant and unspecified	2424	112	0.8308700000000001	0.055479999999999995	0.03203302586431895
5HT1D_HUMAN	374147	Skin and subcutaneous tissue disorders NEC	39119	1580	0.7219	0.0	0.0
5HT1D_HUMAN	374147	Skin and subcutaneous tissue disorders congenital	1516	55	0.64568	0.0008699999999999999	0.0006360089949947206
5HT1D_HUMAN	374147	Skin and subcutaneous tissue infections and infestations	67121	3190	0.85582	0.0	0.0
5HT1D_HUMAN	374147	Skin and subcutaneous tissue therapeutic procedures	1668	97	1.05901	0.55525	0.24688786865636522
5HT1D_HUMAN	374147	Skin appendage conditions	152879	8659	1.02979	0.00746	0.004907894736842105
5HT1D_HUMAN	374147	Skin investigations	274	13	0.85429	0.69104	0.29716443357134054
5HT1D_HUMAN	374147	Skin neoplasms malignant and unspecified	17465	552	0.55979	0.0	0.0
5HT1D_HUMAN	374147	Skin vascular abnormalities	90266	3064	0.60265	0.0	0.0
5HT1D_HUMAN	374147	Sleep disorders and disturbances	263347	32688	2.43065	0.0	0.0
5HT1D_HUMAN	374147	Sleep disturbances (incl subtypes)	163046	18948	2.25533	0.0	0.0
5HT1D_HUMAN	374147	Soft tissue neoplasms benign	3879	215	1.00644	0.9159	0.37476768788656656
5HT1D_HUMAN	374147	Soft tissue neoplasms malignant and unspecified (excl sarcomas)	179	6	0.59485	0.25131	0.1255366605900722
5HT1D_HUMAN	374147	Soft tissue sarcomas	2342	45	0.33601	0.0	0.0
5HT1D_HUMAN	374147	Soft tissue therapeutic procedures	853	45	0.9552299999999999	0.8220299999999999	0.34169311463689606
5HT1D_HUMAN	374147	Somatoform and factitious disorders	9613	1003	1.99803	0.0	0.0
5HT1D_HUMAN	374147	Spinal cord and nerve root disorders	19777	1352	1.2585600000000001	0.0	0.0
5HT1D_HUMAN	374147	Spleen, lymphatic and reticuloendothelial system disorders	31984	1648	0.93176	0.00491	0.0032990858446676746
5HT1D_HUMAN	374147	Structural brain disorders	12793	1401	2.10932	0.0	0.0
5HT1D_HUMAN	374147	Suicidal and self-injurious behaviours NEC	110356	21382	4.12183	0.0	0.0
5HT1D_HUMAN	374147	Synovial and bursal disorders	8642	484	1.01758	0.7058300000000001	0.3023590357576359
5HT1D_HUMAN	374147	Tendon, ligament and cartilage disorders	31005	1224	0.7049300000000001	0.0	0.0
5HT1D_HUMAN	374147	Testicular and epididymal disorders	3796	203	0.96904	0.6955	0.29867875929792664
5HT1D_HUMAN	374147	Therapeutic and nontherapeutic effects (excl toxicity)	684282	44847	1.2029299999999998	0.0	0.0
5HT1D_HUMAN	374147	Therapeutic procedures and supportive care NEC	180894	16161	1.6826400000000001	0.0	0.0
5HT1D_HUMAN	374147	Thoracic disorders (excl lung and pleura)	13512	816	1.10237	0.00778	0.005108638364415614
5HT1D_HUMAN	374147	Thyroid gland disorders	31831	2333	1.3565200000000002	0.0	0.0
5HT1D_HUMAN	374147	Tissue disorders NEC	48298	2262	0.84275	0.0	0.0
5HT1D_HUMAN	374147	Tongue conditions	74655	4077	0.9907799999999999	0.5723699999999999	0.2532561199301415
5HT1D_HUMAN	374147	Toxicology and therapeutic drug monitoring	32361	4922	3.07665	0.0	0.0
5HT1D_HUMAN	374147	Upper respiratory tract disorders (excl infections)	101683	4171	0.73365	0.0	0.0
5HT1D_HUMAN	374147	Ureteric disorders	2247	176	1.4576	0.0	0.0
5HT1D_HUMAN	374147	Urethral disorders (excl calculi)	2892	173	1.0912899999999999	0.27086	0.13394800634654075
5HT1D_HUMAN	374147	Urinary tract signs and symptoms	122022	8996	1.36514	0.0	0.0
5HT1D_HUMAN	374147	Urolithiases	17054	797	0.84086	0.0	0.0
5HT1D_HUMAN	374147	Uterine, pelvic and broad ligament disorders	25740	1038	0.72073	0.0	0.0
5HT1D_HUMAN	374147	Vascular disorders NEC	279434	14781	0.95793	0.0	0.0
5HT1D_HUMAN	374147	Vascular haemorrhagic disorders	417455	14718	0.6268	0.0	0.0
5HT1D_HUMAN	374147	Vascular hypertensive disorders	113157	8241	1.34723	0.0	0.0
5HT1D_HUMAN	374147	Vascular inflammations	15808	668	0.75676	0.0	0.0
5HT1D_HUMAN	374147	Vascular injuries	2240	69	0.5451199999999999	0.0	0.0
5HT1D_HUMAN	374147	Vascular therapeutic procedures	15423	419	0.47897	0.0	0.0
5HT1D_HUMAN	374147	Venous varices	15997	813	0.91835	0.01746	0.010920401337792643
5HT1D_HUMAN	374147	Viral infectious disorders	124351	4824	0.69222	0.0	0.0
5HT1D_HUMAN	374147	Vision disorders	144791	8384	1.05419	0.0	0.0
5HT1D_HUMAN	374147	Vitamin related disorders	8302	624	1.39393	0.0	0.0
5HT1D_HUMAN	374147	Vulvovaginal disorders (excl infections and inflammations)	32718	881	0.47462	0.0	0.0
5HT1D_HUMAN	374147	Water, electrolyte and mineral investigations	48785	3199	1.2036200000000001	0.0	0.0
5HT1D_HUMAN	374147	White blood cell disorders	105036	10644	1.93408	0.0	0.0
5HT1E_HUMAN	215706	Abdominal hernias and other abdominal wall conditions	16184	476	0.9237700000000001	0.08813	0.049064493358540594
5HT1E_HUMAN	215706	Abortions and stillbirth	27420	730	0.83378	0.0	0.0
5HT1E_HUMAN	215706	Acid-base disorders	59306	3704	2.03076	0.0	0.0
5HT1E_HUMAN	215706	Adjustment disorders (incl subtypes)	952	101	3.61801	0.0	0.0
5HT1E_HUMAN	215706	Administration site reactions	325762	1808	0.17013	0.0	0.0
5HT1E_HUMAN	215706	Adrenal gland disorders	8941	278	0.97826	0.74	0.3134978093734528
5HT1E_HUMAN	215706	Age related factors	1700	60	1.1152799999999998	0.40594	0.18934722886485542
5HT1E_HUMAN	215706	Allergic conditions	330561	6033	0.56671	0.0	0.0
5HT1E_HUMAN	215706	Anaemias nonhaemolytic and marrow depression	127438	3069	0.75225	0.0	0.0
5HT1E_HUMAN	215706	Anal and rectal conditions NEC	13492	200	0.45869	0.0	0.0
5HT1E_HUMAN	215706	Ancillary infectious topics	26835	712	0.8308700000000001	0.0	0.0
5HT1E_HUMAN	215706	Aneurysms and artery dissections	10593	229	0.67357	0.0	0.0
5HT1E_HUMAN	215706	Angioedema and urticaria	115947	1555	0.41439	0.0	0.0
5HT1E_HUMAN	215706	Anterior eye structural change, deposit and degeneration	28519	667	0.7300399999999999	0.0	0.0
5HT1E_HUMAN	215706	Anxiety disorders and symptoms	214467	16922	2.61134	0.0	0.0
5HT1E_HUMAN	215706	Appetite and general nutritional disorders	157395	9073	1.8647599999999998	0.0	0.0
5HT1E_HUMAN	215706	Arteriosclerosis, stenosis, vascular insufficiency and necrosis	300539	6786	0.70422	0.0	0.0
5HT1E_HUMAN	215706	Aural disorders NEC	22997	566	0.7692100000000001	0.0	0.0
5HT1E_HUMAN	215706	Autoimmune disorders	73876	960	0.40135	0.0	0.0
5HT1E_HUMAN	215706	Bacterial infectious disorders	115621	2576	0.69466	0.0	0.0
5HT1E_HUMAN	215706	Benign neoplasms gastrointestinal	7492	162	0.67373	0.0	0.0
5HT1E_HUMAN	215706	Bile duct disorders	9028	335	1.17477	0.00474	0.003190178313038445
5HT1E_HUMAN	215706	Bladder and bladder neck disorders (excl calculi)	39461	930	0.73578	0.0	0.0
5HT1E_HUMAN	215706	Blood and lymphatic system disorders congenital	3344	67	0.62327	5e-05	4.057040105205715e-05
5HT1E_HUMAN	215706	Body temperature conditions	172155	7992	1.4840799999999998	0.0	0.0
5HT1E_HUMAN	215706	Bone and joint injuries	123309	3507	0.89238	0.0	0.0
5HT1E_HUMAN	215706	Bone and joint therapeutic procedures	30966	585	0.58699	0.0	0.0
5HT1E_HUMAN	215706	Bone disorders (excl congenital and fractures)	104336	1511	0.44796	0.0	0.0
5HT1E_HUMAN	215706	Bone, calcium, magnesium and phosphorus metabolism disorders	43097	904	0.6531399999999999	0.0	0.0
5HT1E_HUMAN	215706	Breast disorders	78951	2099	0.8326	0.0	0.0
5HT1E_HUMAN	215706	Breast neoplasms benign (incl nipple)	2309	66	0.897	0.43991	0.2030608727072858
5HT1E_HUMAN	215706	Breast neoplasms malignant and unspecified (incl nipple)	49167	617	0.38741	0.0	0.0
5HT1E_HUMAN	215706	Breast therapeutic procedures	2104	54	0.803	0.11972000000000001	0.06485110398413751
5HT1E_HUMAN	215706	Bronchial disorders (excl neoplasms)	80293	2522	0.98856	0.5777100000000001	0.25527270734273916
5HT1E_HUMAN	215706	Cardiac and vascular disorders congenital	14353	507	1.11625	0.01609	0.010116971348154927
5HT1E_HUMAN	215706	Cardiac and vascular investigations (excl enzyme tests)	186678	8456	1.44638	0.0	0.0
5HT1E_HUMAN	215706	Cardiac arrhythmias	218674	12612	1.86579	0.0	0.0
5HT1E_HUMAN	215706	Cardiac disorder signs and symptoms	542853	14732	0.8503700000000001	0.0	0.0
5HT1E_HUMAN	215706	Cardiac neoplasms	331	9	0.85205	0.75458	0.3184192930054248
5HT1E_HUMAN	215706	Cardiac therapeutic procedures	10242	171	0.51761	0.0	0.0
5HT1E_HUMAN	215706	Cardiac valve disorders	19057	604	0.9978100000000001	0.9835	0.39291113796942484
5HT1E_HUMAN	215706	Central nervous system infections and inflammations	19686	401	0.6338699999999999	0.0	0.0
5HT1E_HUMAN	215706	Central nervous system vascular disorders	172365	4011	0.72628	0.0	0.0
5HT1E_HUMAN	215706	Cervix disorders (excl infections and inflammations)	4159	95	0.7126	0.0007599999999999999	0.0005587782299249363
5HT1E_HUMAN	215706	Changes in physical activity	34687	4747	4.83331	0.0	0.0
5HT1E_HUMAN	215706	Chemical injury and poisoning	123001	5415	1.40385	0.0	0.0
5HT1E_HUMAN	215706	Chlamydial infectious disorders	522	14	0.8401200000000001	0.61739	0.26999649469623915
5HT1E_HUMAN	215706	Chromosomal abnormalities and abnormal gene carriers	2430	86	1.11845	0.29765	0.14526543625063898
5HT1E_HUMAN	215706	Coagulopathies and bleeding diatheses (excl thrombocytopenic)	42323	835	0.61354	0.0	0.0
5HT1E_HUMAN	215706	Cognitive and attention disorders and disturbances	66027	4843	2.41298	0.0	0.0
5HT1E_HUMAN	215706	Communication disorders and disturbances	72637	5007	2.25692	0.0	0.0
5HT1E_HUMAN	215706	Congenital and hereditary disorders NEC	10074	325	1.01625	0.7761399999999999	0.3259884322932585
5HT1E_HUMAN	215706	Congenital and peripartum neurological conditions	4994	233	1.4918799999999999	0.0	0.0
5HT1E_HUMAN	215706	Congenital cardiac disorders	6451	188	0.91507	0.24113	0.12104745485036834
5HT1E_HUMAN	215706	Congenital ear disorders (excl deafness)	1075	37	1.08663	0.60124	0.26391232680478727
5HT1E_HUMAN	215706	Congenital eye disorders (excl glaucoma)	886	23	0.81245	0.38758000000000004	0.1821944388297183
5HT1E_HUMAN	215706	Congenital reproductive tract and breast disorders	1844	71	1.22075	0.11030999999999999	0.06014244666590524
5HT1E_HUMAN	215706	Congenital respiratory tract disorders	1190	23	0.6008100000000001	0.012790000000000001	0.00816151318798061
5HT1E_HUMAN	215706	Connective tissue disorders (excl congenital)	21636	326	0.46635	0.0	0.0
5HT1E_HUMAN	215706	Cornification and dystrophic skin disorders	9417	217	0.7190300000000001	0.0	0.0
5HT1E_HUMAN	215706	Coronary artery disorders	278562	6876	0.77152	0.0	0.0
5HT1E_HUMAN	215706	Cranial nerve disorders (excl neoplasms)	52382	1273	0.7592899999999999	0.0	0.0
5HT1E_HUMAN	215706	Cutaneous neoplasms benign	5790	132	0.71119	5.9999999999999995e-05	4.840172901435508e-05
5HT1E_HUMAN	215706	Cytogenetic investigations	573	5	0.26835	0.00047000000000000004	0.00035208754903985135
5HT1E_HUMAN	215706	Cytoplasmic disorders congenital	378	11	0.9137	0.8837700000000001	0.3632661210283741
5HT1E_HUMAN	215706	Decreased and nonspecific blood pressure disorders and shock	378305	12874	1.07395	0.0	0.0
5HT1E_HUMAN	215706	Deliria (incl confusion)	90586	7078	2.5838099999999997	0.0	0.0
5HT1E_HUMAN	215706	Dementia and amnestic conditions	87697	4878	1.79552	0.0	0.0
5HT1E_HUMAN	215706	Demyelinating disorders	52603	571	0.33454	0.0	0.0
5HT1E_HUMAN	215706	Dental and gingival conditions	47772	1218	0.79757	0.0	0.0
5HT1E_HUMAN	215706	Depressed mood disorders and disturbances	141290	9074	2.09215	0.0	0.0
5HT1E_HUMAN	215706	Developmental disorders NEC	2757	274	3.36396	0.0	0.0
5HT1E_HUMAN	215706	Diabetic complications	17966	4391	9.86055	0.0	0.0
5HT1E_HUMAN	215706	Dissociative disorders	2897	304	3.57395	0.0	0.0
5HT1E_HUMAN	215706	Disturbances in thinking and perception	62652	8467	4.76352	0.0	0.0
5HT1E_HUMAN	215706	Diverticular disorders	15412	303	0.61134	0.0	0.0
5HT1E_HUMAN	215706	Ear and labyrinthine disorders congenital	1154	42	1.15139	0.35539	0.16913742929404232
5HT1E_HUMAN	215706	Eating disorders and disturbances	34169	2298	2.19802	0.0	0.0
5HT1E_HUMAN	215706	Economic and housing issues	11788	375	1.00163	0.9580799999999999	0.3905486512480787
5HT1E_HUMAN	215706	Ectoparasitic disorders	616	29	1.50604	0.037630000000000004	0.022363878805352067
5HT1E_HUMAN	215706	Electrolyte and fluid balance conditions	261572	8265	0.99466	0.6289100000000001	0.27441255111367685
5HT1E_HUMAN	215706	Embolism and thrombosis	148186	4034	0.85309	0.0	0.0
5HT1E_HUMAN	215706	Encephalopathies	21467	887	1.31388	0.0	0.0
5HT1E_HUMAN	215706	Endocardial disorders	3205	93	0.911	0.41988000000000003	0.19506295490050454
5HT1E_HUMAN	215706	Endocrine and glandular disorders NEC	616	146	9.469619999999999	0.0	0.0
5HT1E_HUMAN	215706	Endocrine disorders congenital	383	31	2.6847	0.0	0.0
5HT1E_HUMAN	215706	Endocrine disorders of gonadal function	47601	1257	0.8268399999999999	0.0	0.0
5HT1E_HUMAN	215706	Endocrine gland therapeutic procedures	1573	19	0.37272	0.0	0.0
5HT1E_HUMAN	215706	Endocrine investigations (incl sex hormones)	25080	1202	1.5345600000000001	0.0	0.0
5HT1E_HUMAN	215706	Endocrine neoplasms benign	2304	144	2.03229	0.0	0.0
5HT1E_HUMAN	215706	Endocrine neoplasms malignant and unspecified	9017	227	0.78725	0.00023999999999999998	0.0001845793798173539
5HT1E_HUMAN	215706	Environmental issues	573	18	0.9886799999999999	1.0	0.39291113796942484
5HT1E_HUMAN	215706	Enzyme investigations NEC	43698	3449	2.61225	0.0	0.0
5HT1E_HUMAN	215706	Epidermal and dermal conditions	666415	10910	0.50737	0.0	0.0
5HT1E_HUMAN	215706	Exocrine pancreas conditions	41247	5800	4.98799	0.0	0.0
5HT1E_HUMAN	215706	External ear disorders (excl congenital)	2702	103	1.20812	0.062	0.035505297319139796
5HT1E_HUMAN	215706	Eye disorders NEC	66383	1323	0.6199	0.0	0.0
5HT1E_HUMAN	215706	Eye disorders congenital	1921	54	0.88171	0.39749	0.18592594903742515
5HT1E_HUMAN	215706	Eye therapeutic procedures	5660	70	0.38174	0.0	0.0
5HT1E_HUMAN	215706	Family issues	5040	179	1.12255	0.12685	0.06833502607414797
5HT1E_HUMAN	215706	Fatal outcomes	307071	10095	1.03624	0.00033999999999999997	0.00025795712146687075
5HT1E_HUMAN	215706	Female reproductive tract infections and inflammations	8399	193	0.71697	0.0	0.0
5HT1E_HUMAN	215706	Foetal and neonatal investigations	1607	52	1.01941	0.8867200000000001	0.36432514314706094
5HT1E_HUMAN	215706	Foetal complications	14238	603	1.34815	0.0	0.0
5HT1E_HUMAN	215706	Food intolerance syndromes	8964	206	0.7170300000000001	0.0	0.0
5HT1E_HUMAN	215706	Fractures	96081	2729	0.8911600000000001	0.0	0.0
5HT1E_HUMAN	215706	Fungal infectious disorders	46404	804	0.5374899999999999	0.0	0.0
5HT1E_HUMAN	215706	Gallbladder disorders	36730	1227	1.05355	0.07341	0.04150068562310675
5HT1E_HUMAN	215706	Gastrointestinal conditions NEC	58886	1508	0.80119	0.0	0.0
5HT1E_HUMAN	215706	Gastrointestinal haemorrhages NEC	104328	2063	0.6149600000000001	0.0	0.0
5HT1E_HUMAN	215706	Gastrointestinal infections	49172	1151	0.7306699999999999	0.0	0.0
5HT1E_HUMAN	215706	Gastrointestinal inflammatory conditions	71493	1660	0.72464	0.0	0.0
5HT1E_HUMAN	215706	Gastrointestinal investigations	10977	406	1.1708100000000001	0.00227	0.0015853957155837555
5HT1E_HUMAN	215706	Gastrointestinal motility and defaecation conditions	305542	8020	0.8217399999999999	0.0	0.0
5HT1E_HUMAN	215706	Gastrointestinal neoplasms benign	8328	194	0.72707	0.0	0.0
5HT1E_HUMAN	215706	Gastrointestinal neoplasms malignant and unspecified	30233	631	0.64981	0.0	0.0
5HT1E_HUMAN	215706	Gastrointestinal signs and symptoms	677692	17976	0.8306399999999999	0.0	0.0
5HT1E_HUMAN	215706	Gastrointestinal stenosis and obstruction	31359	1390	1.4139	0.0	0.0
5HT1E_HUMAN	215706	Gastrointestinal therapeutic procedures	16874	615	1.1530799999999999	0.00066	0.00048782117624049615
5HT1E_HUMAN	215706	Gastrointestinal tract disorders congenital	5083	205	1.28112	0.0007700000000000001	0.0005658920381804334
5HT1E_HUMAN	215706	Gastrointestinal ulceration and perforation	41810	1024	0.76536	0.0	0.0
5HT1E_HUMAN	215706	Gastrointestinal vascular conditions	17715	609	1.0852899999999999	0.04842	0.02824331328981639
5HT1E_HUMAN	215706	Gender related factors	644	48	2.45512	0.0	0.0
5HT1E_HUMAN	215706	General system disorders NEC	1483087	43179	0.91415	0.0	0.0
5HT1E_HUMAN	215706	Genitourinary tract disorders NEC	66124	2528	1.2117799999999999	0.0	0.0
5HT1E_HUMAN	215706	Glaucoma and ocular hypertension	9263	342	1.16866	0.0053100000000000005	0.003554237851001808
5HT1E_HUMAN	215706	Glucose metabolism disorders (incl diabetes mellitus)	103625	18415	6.588080000000001	0.0	0.0
5HT1E_HUMAN	215706	Gonadotrophin and sex hormone changes	291	8	0.86175	0.8666	0.3572009852261522
5HT1E_HUMAN	215706	Haematological and lymphoid tissue therapeutic procedures	24446	470	0.59758	0.0	0.0
5HT1E_HUMAN	215706	Haematological disorders NEC	10574	246	0.7261	0.0	0.0
5HT1E_HUMAN	215706	Haematology investigations (incl blood groups)	191896	11313	1.90976	0.0	0.0
5HT1E_HUMAN	215706	Haematopoietic neoplasms (excl leukaemias and lymphomas)	7665	93	0.37440999999999997	0.0	0.0
5HT1E_HUMAN	215706	Haemoglobinopathies	2301	39	0.52559	1e-05	8.460741970690573e-06
5HT1E_HUMAN	215706	Haemolyses and related conditions	29699	590	0.61788	0.0	0.0
5HT1E_HUMAN	215706	Head and neck therapeutic procedures	13635	252	0.57402	0.0	0.0
5HT1E_HUMAN	215706	Headaches	258675	6291	0.7598600000000001	0.0	0.0
5HT1E_HUMAN	215706	Hearing disorders	28721	621	0.67369	0.0	0.0
5HT1E_HUMAN	215706	Heart failures	230830	5167	0.698	0.0	0.0
5HT1E_HUMAN	215706	Helminthic disorders	741	12	0.5018	0.01167	0.007483784070421042
5HT1E_HUMAN	215706	Hepatic and biliary neoplasms benign	3244	82	0.79055	0.035269999999999996	0.021050827493172768
5HT1E_HUMAN	215706	Hepatic and hepatobiliary disorders	160023	5630	1.11162	0.0	0.0
5HT1E_HUMAN	215706	Hepatobiliary disorders congenital	190	8	1.33997	0.40249	0.18795161921433354
5HT1E_HUMAN	215706	Hepatobiliary investigations	97697	4649	1.52311	0.0	0.0
5HT1E_HUMAN	215706	Hepatobiliary neoplasms	12957	246	0.58997	0.0	0.0
5HT1E_HUMAN	215706	Hepatobiliary neoplasms malignant and unspecified	5969	105	0.54585	0.0	0.0
5HT1E_HUMAN	215706	Hepatobiliary therapeutic procedures	11256	331	0.9236	0.16182	0.08488126398824841
5HT1E_HUMAN	215706	Hypothalamus and pituitary gland disorders	15821	1784	3.87434	0.0	0.0
5HT1E_HUMAN	215706	Immune disorders NEC	75386	902	0.36917	0.0	0.0
5HT1E_HUMAN	215706	Immune system disorders congenital	214	5	0.72929	0.69402	0.29820414138112356
5HT1E_HUMAN	215706	Immunodeficiency syndromes	11416	181	0.49111000000000005	0.0	0.0
5HT1E_HUMAN	215706	Immunology and allergy investigations	18435	308	0.5179699999999999	0.0	0.0
5HT1E_HUMAN	215706	Impulse control disorders NEC	5185	792	5.49593	0.0	0.0
5HT1E_HUMAN	215706	Inborn errors of metabolism	1799	48	0.83567	0.25237	0.12601272240817404
5HT1E_HUMAN	215706	Increased intracranial pressure and hydrocephalus	13127	454	1.09208	0.06529	0.03724943230781811
5HT1E_HUMAN	215706	Infections - pathogen unspecified	549473	14809	0.84435	0.0	0.0
5HT1E_HUMAN	215706	Infections and infestations congenital	176	4	0.70894	0.66685	0.28862455083819677
5HT1E_HUMAN	215706	Injuries NEC	358480	13376	1.18155	0.0	0.0
5HT1E_HUMAN	215706	Injuries by physical agents	19040	1129	1.92155	0.0	0.0
5HT1E_HUMAN	215706	Inner ear and VIIIth cranial nerve disorders	43066	1081	0.78489	0.0	0.0
5HT1E_HUMAN	215706	Investigations, imaging and histopathology procedures NEC	28460	680	0.7462	0.0	0.0
5HT1E_HUMAN	215706	Iron and trace metal metabolism disorders	6559	263	1.27341	0.00021	0.00016234530019433366
5HT1E_HUMAN	215706	Joint disorders	266568	4141	0.48103	0.0	0.0
5HT1E_HUMAN	215706	Legal issues	6758	663	3.3160199999999995	0.0	0.0
5HT1E_HUMAN	215706	Leukaemias	24571	328	0.41244	0.0	0.0
5HT1E_HUMAN	215706	Lifestyle issues	87109	5258	1.95828	0.0	0.0
5HT1E_HUMAN	215706	Lipid analyses	35100	4311	4.26835	0.0	0.0
5HT1E_HUMAN	215706	Lipid metabolism disorders	26032	2712	3.54518	0.0	0.0
5HT1E_HUMAN	215706	Lower respiratory tract disorders (excl obstruction and infection)	95545	3245	1.07174	0.00011	8.703807097742262e-05
5HT1E_HUMAN	215706	Lymphatic vessel disorders	3609	76	0.65576	0.00014	0.00010982908939939107
5HT1E_HUMAN	215706	Lymphomas Hodgkin's disease	1741	59	1.06931	0.58453	0.2579356679624215
5HT1E_HUMAN	215706	Lymphomas NEC	6822	176	0.80729	0.0045899999999999995	0.00309432069034718
5HT1E_HUMAN	215706	Lymphomas non-Hodgkin's B-cell	4770	100	0.65277	1e-05	8.460741970690573e-06
5HT1E_HUMAN	215706	Lymphomas non-Hodgkin's T-cell	1988	15	0.23176	0.0	0.0
5HT1E_HUMAN	215706	Lymphomas non-Hodgkin's unspecified histology	2851	102	1.1311	0.21907	0.11115825366011937
5HT1E_HUMAN	215706	Malabsorption conditions	9598	198	0.64212	0.0	0.0
5HT1E_HUMAN	215706	Male genital tract therapeutic procedures	1263	32	0.79245	0.22776	0.1151213303314683
5HT1E_HUMAN	215706	Male reproductive tract infections and inflammations	3281	110	1.05748	0.55008	0.2449621852246449
5HT1E_HUMAN	215706	Malignant and unspecified neoplasms gastrointestinal NEC	32935	699	0.6610199999999999	0.0	0.0
5HT1E_HUMAN	215706	Manic and bipolar mood disorders and disturbances	15716	4845	13.586310000000001	0.0	0.0
5HT1E_HUMAN	215706	Maternal complications of labour and delivery	9293	369	1.2605	2e-05	1.6652132005324277e-05
5HT1E_HUMAN	215706	Maternal complications of pregnancy	11186	698	2.0288	0.0	0.0
5HT1E_HUMAN	215706	Medication errors	467421	23370	1.60437	0.0	0.0
5HT1E_HUMAN	215706	Menopause and related conditions	26771	514	0.59675	0.0	0.0
5HT1E_HUMAN	215706	Menstrual cycle and uterine bleeding disorders	63922	1048	0.50812	0.0	0.0
5HT1E_HUMAN	215706	Mental impairment disorders	130571	8780	2.1976400000000003	0.0	0.0
5HT1E_HUMAN	215706	Mesotheliomas	357	3	0.25834	0.0061600000000000005	0.0040924686131173
5HT1E_HUMAN	215706	Metabolic and nutritional disorders congenital	2184	74	1.06912	0.5419	0.24188273564338408
5HT1E_HUMAN	215706	Metabolic, nutritional and blood gas investigations	148134	4954	1.05475	0.00022	0.00016978370743495058
5HT1E_HUMAN	215706	Metabolism disorders NEC	35688	2546	2.3418400000000004	0.0	0.0
5HT1E_HUMAN	215706	Metastases	22915	428	0.58022	0.0	0.0
5HT1E_HUMAN	215706	Microbiology and serology investigations	19878	349	0.54478	0.0	0.0
5HT1E_HUMAN	215706	Middle ear disorders (excl congenital)	4329	123	0.8914799999999999	0.22462	0.11367992455946521
5HT1E_HUMAN	215706	Miscellaneous and site unspecified neoplasms benign	11196	306	0.85659	0.00698	0.0046077134144122504
5HT1E_HUMAN	215706	Miscellaneous and site unspecified neoplasms malignant and unspecified	62091	1084	0.54166	0.0	0.0
5HT1E_HUMAN	215706	Mood disorders and disturbances NEC	137071	8642	2.0513	0.0	0.0
5HT1E_HUMAN	215706	Movement disorders (incl parkinsonism)	180506	19905	3.77826	0.0	0.0
5HT1E_HUMAN	215706	Muscle disorders	305176	11344	1.1769100000000001	0.0	0.0
5HT1E_HUMAN	215706	Musculoskeletal and connective tissue deformities (incl intervertebral disc disorders)	36240	1037	0.898	0.00055	0.00040951106586983654
5HT1E_HUMAN	215706	Musculoskeletal and connective tissue disorders NEC	339812	7859	0.72172	0.0	0.0
5HT1E_HUMAN	215706	Musculoskeletal and connective tissue disorders congenital	9356	378	1.28348	0.0	0.0
5HT1E_HUMAN	215706	Musculoskeletal and connective tissue neoplasms	12171	271	0.69422	0.0	0.0
5HT1E_HUMAN	215706	Musculoskeletal and soft tissue investigations (excl enzyme tests)	9375	218	0.7257399999999999	0.0	0.0
5HT1E_HUMAN	215706	Mycobacterial infectious disorders	12129	120	0.30462	0.0	0.0
5HT1E_HUMAN	215706	Mycoplasmal infectious disorders	604	17	0.88285	0.72729	0.31009468988275996
5HT1E_HUMAN	215706	Myocardial disorders	41763	2725	2.12793	0.0	0.0
5HT1E_HUMAN	215706	Neonatal and perinatal conditions	30239	1602	1.70535	0.0	0.0
5HT1E_HUMAN	215706	Neonatal respiratory disorders	5798	469	2.6829	0.0	0.0
5HT1E_HUMAN	215706	Neoplasm related morbidities	10712	144	0.41538	0.0	0.0
5HT1E_HUMAN	215706	Neoplastic and ectopic endocrinopathies	2311	64	0.8682700000000001	0.28555	0.14004663826013605
5HT1E_HUMAN	215706	Nephropathies	22120	586	0.8295600000000001	0.0	0.0
5HT1E_HUMAN	215706	Nervous system neoplasms benign	2453	104	1.3496700000000001	0.00391	0.002659584680110692
5HT1E_HUMAN	215706	Nervous system neoplasms malignant and unspecified NEC	8242	265	1.01271	0.82588	0.3429963505822126
5HT1E_HUMAN	215706	Nervous system, skull and spine therapeutic procedures	6643	167	0.7861199999999999	0.00162	0.0011504024302402055
5HT1E_HUMAN	215706	Neurological disorders NEC	938369	46665	1.59532	0.0	0.0
5HT1E_HUMAN	215706	Neurological disorders congenital	5222	228	1.39176	0.0	0.0
5HT1E_HUMAN	215706	Neurological disorders of the eye	119728	4106	1.08257	0.0	0.0
5HT1E_HUMAN	215706	Neurological, special senses and psychiatric investigations	14203	637	1.43141	0.0	0.0
5HT1E_HUMAN	215706	Neuromuscular disorders	109514	8340	2.5129	0.0	0.0
5HT1E_HUMAN	215706	Obstetric and gynaecological therapeutic procedures	21059	801	1.20535	0.0	0.0
5HT1E_HUMAN	215706	Ocular haemorrhages and vascular disorders NEC	10897	139	0.39388	0.0	0.0
5HT1E_HUMAN	215706	Ocular infections, irritations and inflammations	73378	1002	0.42203999999999997	0.0	0.0
5HT1E_HUMAN	215706	Ocular injuries	3510	103	0.9216	0.44117	0.2035741053531273
5HT1E_HUMAN	215706	Ocular neoplasms	834	17	0.63431	0.06034	0.03460820680802089
5HT1E_HUMAN	215706	Ocular neuromuscular disorders	27471	2094	2.5154400000000003	0.0	0.0
5HT1E_HUMAN	215706	Ocular sensory symptoms NEC	13075	384	0.9223899999999999	0.1217	0.06581320057238255
5HT1E_HUMAN	215706	Ocular structural change, deposit and degeneration NEC	23238	400	0.53392	0.0	0.0
5HT1E_HUMAN	215706	Oral soft tissue conditions	152627	3022	0.61578	0.0	0.0
5HT1E_HUMAN	215706	Ovarian and fallopian tube disorders	13507	287	0.6618	0.0	0.0
5HT1E_HUMAN	215706	Parathyroid gland disorders	8837	211	0.74568	1e-05	8.460741970690573e-06
5HT1E_HUMAN	215706	Penile and scrotal disorders (excl infections and inflammations)	7478	153	0.63674	0.0	0.0
5HT1E_HUMAN	215706	Pericardial disorders	14148	586	1.3172	0.0	0.0
5HT1E_HUMAN	215706	Peripheral neuropathies	53974	2529	1.4985899999999999	0.0	0.0
5HT1E_HUMAN	215706	Peritoneal and retroperitoneal conditions	33282	501	0.4659	0.0	0.0
5HT1E_HUMAN	215706	Personality disorders and disturbances in behaviour	71406	8182	3.94507	0.0	0.0
5HT1E_HUMAN	215706	Physical examination topics	207297	15749	2.50641	0.0	0.0
5HT1E_HUMAN	215706	Pigmentation disorders	7098	125	0.54647	0.0	0.0
5HT1E_HUMAN	215706	Placental, amniotic and cavity disorders (excl haemorrhages)	4396	178	1.28644	0.00143	0.0010218067799547793
5HT1E_HUMAN	215706	Plasma cell neoplasms	16095	106	0.2021	0.0	0.0
5HT1E_HUMAN	215706	Platelet disorders	51325	1384	0.8448	0.0	0.0
5HT1E_HUMAN	215706	Pleural disorders	38350	893	0.72677	0.0	0.0
5HT1E_HUMAN	215706	Postpartum and puerperal disorders	2081	175	2.79893	0.0	0.0
5HT1E_HUMAN	215706	Pregnancy, labour, delivery and postpartum conditions	62379	2302	1.16809	0.0	0.0
5HT1E_HUMAN	215706	Procedural and device related injuries and complications NEC	236255	3174	0.41512	0.0	0.0
5HT1E_HUMAN	215706	Product quality issues	147837	1904	0.39773000000000003	0.0	0.0
5HT1E_HUMAN	215706	Prostatic disorders (excl infections and inflammations)	14623	305	0.64937	0.0	0.0
5HT1E_HUMAN	215706	Protein and amino acid metabolism disorders NEC	7094	346	1.5630700000000002	0.0	0.0
5HT1E_HUMAN	215706	Protein and chemistry analyses NEC	21380	1509	2.31498	0.0	0.0
5HT1E_HUMAN	215706	Protozoal infectious disorders	2491	31	0.38415	0.0	0.0
5HT1E_HUMAN	215706	Psychiatric and behavioural symptoms NEC	45982	4486	3.2955699999999997	0.0	0.0
5HT1E_HUMAN	215706	Psychiatric disorders NEC	182062	15343	2.80545	0.0	0.0
5HT1E_HUMAN	215706	Psychiatric therapeutic procedures	163	37	8.95176	0.0	0.0
5HT1E_HUMAN	215706	Pulmonary vascular disorders	69879	2415	1.09125	2.9999999999999997e-05	2.4708510406450908e-05
5HT1E_HUMAN	215706	Purine and pyrimidine metabolism disorders	9204	120	0.4027	0.0	0.0
5HT1E_HUMAN	215706	Red blood cell disorders	2744	162	1.91265	0.0	0.0
5HT1E_HUMAN	215706	Renal and urinary tract disorders congenital	2883	99	1.08404	0.42532	0.19730319815465502
5HT1E_HUMAN	215706	Renal and urinary tract investigations and urinalyses	62571	1999	1.00605	0.78345	0.3282743160462344
5HT1E_HUMAN	215706	Renal and urinary tract neoplasms benign	4296	135	0.9890399999999999	0.9652700000000001	0.39291113796942484
5HT1E_HUMAN	215706	Renal and urinary tract neoplasms malignant and unspecified	22349	185	0.25445	0.0	0.0
5HT1E_HUMAN	215706	Renal and urinary tract therapeutic procedures	4374	100	0.71325	0.00055	0.00040951106586983654
5HT1E_HUMAN	215706	Renal disorders (excl nephropathies)	225563	6087	0.84546	0.0	0.0
5HT1E_HUMAN	215706	Reproductive and genitourinary neoplasms gender unspecified NEC	82	4	1.5633	0.33443	0.16080325817857957
5HT1E_HUMAN	215706	Reproductive neoplasms female benign	11166	238	0.66392	0.0	0.0
5HT1E_HUMAN	215706	Reproductive neoplasms female malignant and unspecified	9156	202	0.68772	0.0	0.0
5HT1E_HUMAN	215706	Reproductive neoplasms male benign	276	9	1.02756	0.8633	0.3559700590091196
5HT1E_HUMAN	215706	Reproductive neoplasms male malignant and unspecified	9477	166	0.5434899999999999	0.0	0.0
5HT1E_HUMAN	215706	Reproductive organ and breast investigations (excl hormone analyses)	3355	61	0.56453	0.0	0.0
5HT1E_HUMAN	215706	Reproductive tract and breast disorders congenital	2630	88	1.05532	0.61645	0.26965042199180134
5HT1E_HUMAN	215706	Reproductive tract disorders NEC	24102	345	0.4427	0.0	0.0
5HT1E_HUMAN	215706	Respiratory and mediastinal neoplasms benign (excl mesotheliomas)	1520	35	0.71849	0.0566	0.03261905820905954
5HT1E_HUMAN	215706	Respiratory and mediastinal neoplasms malignant and unspecified	23789	872	1.15994	2e-05	1.6652132005324277e-05
5HT1E_HUMAN	215706	Respiratory and pulmonary investigations (excl blood gases)	7246	182	0.78541	0.00101	0.0007334075224568876
5HT1E_HUMAN	215706	Respiratory disorders NEC	618843	18400	0.93416	0.0	0.0
5HT1E_HUMAN	215706	Respiratory disorders congenital	2995	65	0.6762699999999999	0.0012	0.0008637821021554871
5HT1E_HUMAN	215706	Respiratory tract infections	317629	8650	0.8534200000000001	0.0	0.0
5HT1E_HUMAN	215706	Respiratory tract neoplasms	27308	932	1.0771700000000002	0.02688	0.016322648027637183
5HT1E_HUMAN	215706	Respiratory tract therapeutic procedures	5830	240	1.30881	9e-05	7.167127617542473e-05
5HT1E_HUMAN	215706	Retina, choroid and vitreous haemorrhages and vascular disorders	11953	329	0.8628100000000001	0.00773	0.005077313577672047
5HT1E_HUMAN	215706	Rickettsial infectious disorders	359	6	0.51815	0.12942	0.06962645692830578
5HT1E_HUMAN	215706	Salivary gland conditions	44406	2750	2.01248	0.0	0.0
5HT1E_HUMAN	215706	Schizophrenia and other psychotic disorders	20418	6916	15.614720000000002	0.0	0.0
5HT1E_HUMAN	215706	Seizures (incl subtypes)	107497	6888	2.08705	0.0	0.0
5HT1E_HUMAN	215706	Sexual dysfunctions, disturbances and gender identity disorders	30237	1617	1.7223400000000002	0.0	0.0
5HT1E_HUMAN	215706	Sexual function and fertility disorders	33222	1954	1.90503	0.0	0.0
5HT1E_HUMAN	215706	Skeletal neoplasms benign	945	11	0.35902	0.00011999999999999999	9.468135080119003e-05
5HT1E_HUMAN	215706	Skeletal neoplasms malignant and unspecified	2424	60	0.77372	0.04874	0.028416445435787335
5HT1E_HUMAN	215706	Skin and subcutaneous tissue disorders NEC	39119	567	0.44835	0.0	0.0
5HT1E_HUMAN	215706	Skin and subcutaneous tissue disorders congenital	1516	25	0.5111399999999999	0.00031	0.00023616815757423042
5HT1E_HUMAN	215706	Skin and subcutaneous tissue infections and infestations	67121	1529	0.7106100000000001	0.0	0.0
5HT1E_HUMAN	215706	Skin and subcutaneous tissue therapeutic procedures	1668	36	0.67245	0.017269999999999997	0.010810063422612677
5HT1E_HUMAN	215706	Skin appendage conditions	152879	4687	0.96416	0.01267	0.00808943530107421
5HT1E_HUMAN	215706	Skin investigations	274	3	0.33747	0.05483	0.031679307181715105
5HT1E_HUMAN	215706	Skin neoplasms malignant and unspecified	17465	172	0.3032	0.0	0.0
5HT1E_HUMAN	215706	Skin vascular abnormalities	90266	1207	0.41315	0.0	0.0
5HT1E_HUMAN	215706	Sleep disorders and disturbances	263347	21146	2.66152	0.0	0.0
5HT1E_HUMAN	215706	Sleep disturbances (incl subtypes)	163046	12285	2.48407	0.0	0.0
5HT1E_HUMAN	215706	Soft tissue neoplasms benign	3879	67	0.5358	0.0	0.0
5HT1E_HUMAN	215706	Soft tissue neoplasms malignant and unspecified (excl sarcomas)	179	3	0.51962	0.38825	0.1824611649982383
5HT1E_HUMAN	215706	Soft tissue sarcomas	2342	33	0.43568	0.0	0.0
5HT1E_HUMAN	215706	Soft tissue therapeutic procedures	853	15	0.54566	0.01441	0.009120062243124994
5HT1E_HUMAN	215706	Somatoform and factitious disorders	9613	557	1.8749799999999999	0.0	0.0
5HT1E_HUMAN	215706	Spinal cord and nerve root disorders	19777	571	0.9063100000000001	0.019540000000000002	0.012132159555315204
5HT1E_HUMAN	215706	Spleen, lymphatic and reticuloendothelial system disorders	31984	900	0.88264	0.00016999999999999999	0.0001324110332508931
5HT1E_HUMAN	215706	Structural brain disorders	12793	827	2.10685	0.0	0.0
5HT1E_HUMAN	215706	Suicidal and self-injurious behaviours NEC	110356	14599	4.64761	0.0	0.0
5HT1E_HUMAN	215706	Synovial and bursal disorders	8642	162	0.5823699999999999	0.0	0.0
5HT1E_HUMAN	215706	Tendon, ligament and cartilage disorders	31005	484	0.48341999999999996	0.0	0.0
5HT1E_HUMAN	215706	Testicular and epididymal disorders	3796	134	1.1154899999999999	0.21123000000000003	0.10754234376841858
5HT1E_HUMAN	215706	Therapeutic and nontherapeutic effects (excl toxicity)	684282	22569	1.0397299999999998	0.0	0.0
5HT1E_HUMAN	215706	Therapeutic procedures and supportive care NEC	180894	10160	1.8140599999999998	0.0	0.0
5HT1E_HUMAN	215706	Thoracic disorders (excl lung and pleura)	13512	365	0.84634	0.00141	0.0010080240247814674
5HT1E_HUMAN	215706	Thyroid gland disorders	31831	1363	1.3637299999999999	0.0	0.0
5HT1E_HUMAN	215706	Tissue disorders NEC	48298	961	0.61887	0.0	0.0
5HT1E_HUMAN	215706	Tongue conditions	74655	2165	0.91045	1e-05	8.460741970690573e-06
5HT1E_HUMAN	215706	Toxicology and therapeutic drug monitoring	32361	3836	4.09949	0.0	0.0
5HT1E_HUMAN	215706	Upper respiratory tract disorders (excl infections)	101683	2014	0.6159899999999999	0.0	0.0
5HT1E_HUMAN	215706	Ureteric disorders	2247	110	1.56915	1e-05	8.460741970690573e-06
5HT1E_HUMAN	215706	Urethral disorders (excl calculi)	2892	91	0.99039	1.0	0.39291113796942484
5HT1E_HUMAN	215706	Urinary tract signs and symptoms	122022	5317	1.38885	0.0	0.0
5HT1E_HUMAN	215706	Urolithiases	17054	334	0.6089600000000001	0.0	0.0
5HT1E_HUMAN	215706	Uterine, pelvic and broad ligament disorders	25740	494	0.5965	0.0	0.0
5HT1E_HUMAN	215706	Vascular disorders NEC	279434	6812	0.76171	0.0	0.0
5HT1E_HUMAN	215706	Vascular haemorrhagic disorders	417455	6792	0.5041800000000001	0.0	0.0
5HT1E_HUMAN	215706	Vascular hypertensive disorders	113157	5006	1.41103	0.0	0.0
5HT1E_HUMAN	215706	Vascular inflammations	15808	260	0.50977	0.0	0.0
5HT1E_HUMAN	215706	Vascular injuries	2240	35	0.48388000000000003	0.0	0.0
5HT1E_HUMAN	215706	Vascular therapeutic procedures	15423	181	0.362	0.0	0.0
5HT1E_HUMAN	215706	Venous varices	15997	384	0.74976	0.0	0.0
5HT1E_HUMAN	215706	Viral infectious disorders	124351	2682	0.67198	0.0	0.0
5HT1E_HUMAN	215706	Vision disorders	144791	4639	1.0090299999999999	0.5395399999999999	0.2410998517029526
5HT1E_HUMAN	215706	Vitamin related disorders	8302	303	1.1547399999999999	0.01585	0.009974501654790567
5HT1E_HUMAN	215706	Vulvovaginal disorders (excl infections and inflammations)	32718	422	0.39833	0.0	0.0
5HT1E_HUMAN	215706	Water, electrolyte and mineral investigations	48785	1802	1.16921	0.0	0.0
5HT1E_HUMAN	215706	White blood cell disorders	105036	8634	2.73026	0.0	0.0
5HT1F_HUMAN	38053	Abdominal hernias and other abdominal wall conditions	16184	138	1.5263	0.0	0.0
5HT1F_HUMAN	38053	Abortions and stillbirth	27420	170	1.1071600000000001	0.181	0.09388696984947614
5HT1F_HUMAN	38053	Acid-base disorders	59306	314	0.9446399999999999	0.33344	0.1603688966190133
5HT1F_HUMAN	38053	Adjustment disorders (incl subtypes)	952	17	3.22675	4e-05	3.2663203478793225e-05
5HT1F_HUMAN	38053	Administration site reactions	325762	3070	1.6884099999999997	0.0	0.0
5HT1F_HUMAN	38053	Adrenal gland disorders	8941	78	1.56186	0.00021	0.00016234530019433366
5HT1F_HUMAN	38053	Age related factors	1700	26	2.75642	1e-05	8.460741970690573e-06
5HT1F_HUMAN	38053	Allergic conditions	330561	2659	1.4391399999999999	0.0	0.0
5HT1F_HUMAN	38053	Anaemias nonhaemolytic and marrow depression	127438	570	0.79735	0.0	0.0
5HT1F_HUMAN	38053	Anal and rectal conditions NEC	13492	65	0.85914	0.24775999999999998	0.1239585845491905
5HT1F_HUMAN	38053	Ancillary infectious topics	26835	135	0.89733	0.21893	0.11109343127765874
5HT1F_HUMAN	38053	Aneurysms and artery dissections	10593	95	1.606	2e-05	1.6652132005324277e-05
5HT1F_HUMAN	38053	Angioedema and urticaria	115947	902	1.39145	0.0	0.0
5HT1F_HUMAN	38053	Anterior eye structural change, deposit and degeneration	28519	143	0.89436	0.18957000000000002	0.0978571981446174
5HT1F_HUMAN	38053	Anxiety disorders and symptoms	214467	2129	1.77941	0.0	0.0
5HT1F_HUMAN	38053	Appetite and general nutritional disorders	157395	852	0.9659	0.31349	0.1518812824169778
5HT1F_HUMAN	38053	Arteriosclerosis, stenosis, vascular insufficiency and necrosis	300539	1819	1.0806799999999999	0.00085	0.0006223913973633435
5HT1F_HUMAN	38053	Aural disorders NEC	22997	218	1.6984400000000002	0.0	0.0
5HT1F_HUMAN	38053	Autoimmune disorders	73876	374	0.9030299999999999	0.04741	0.027690688389464875
5HT1F_HUMAN	38053	Bacterial infectious disorders	115621	569	0.8777	0.00158	0.001123158191736159
5HT1F_HUMAN	38053	Benign neoplasms gastrointestinal	7492	54	1.28844	0.07404	0.04182764247897851
5HT1F_HUMAN	38053	Bile duct disorders	9028	188	3.77428	0.0	0.0
5HT1F_HUMAN	38053	Bladder and bladder neck disorders (excl calculi)	39461	382	1.73479	0.0	0.0
5HT1F_HUMAN	38053	Blood and lymphatic system disorders congenital	3344	16	0.8532299999999999	0.64199	0.2792934407751157
5HT1F_HUMAN	38053	Body temperature conditions	172155	878	0.90975	0.00443	0.002992440717349857
5HT1F_HUMAN	38053	Bone and joint injuries	123309	690	0.99866	1.0	0.39291113796942484
5HT1F_HUMAN	38053	Bone and joint therapeutic procedures	30966	167	0.96229	0.6471100000000001	0.2812995844696117
5HT1F_HUMAN	38053	Bone disorders (excl congenital and fractures)	104336	697	1.19354	0.0	0.0
5HT1F_HUMAN	38053	Bone, calcium, magnesium and phosphorus metabolism disorders	43097	293	1.21482	0.0012	0.0008637821021554871
5HT1F_HUMAN	38053	Breast disorders	78951	351	0.79252	1e-05	8.460741970690573e-06
5HT1F_HUMAN	38053	Breast neoplasms benign (incl nipple)	2309	42	3.28796	0.0	0.0
5HT1F_HUMAN	38053	Breast neoplasms malignant and unspecified (incl nipple)	49167	193	0.69939	0.0	0.0
5HT1F_HUMAN	38053	Breast therapeutic procedures	2104	20	1.70318	0.026439999999999998	0.016071063336438388
5HT1F_HUMAN	38053	Bronchial disorders (excl neoplasms)	80293	573	1.2756	0.0	0.0
5HT1F_HUMAN	38053	Cardiac and vascular disorders congenital	14353	81	1.0072299999999998	0.9108799999999999	0.3729996704184782
5HT1F_HUMAN	38053	Cardiac and vascular investigations (excl enzyme tests)	186678	1489	1.42695	0.0	0.0
5HT1F_HUMAN	38053	Cardiac arrhythmias	218674	1505	1.22989	0.0	0.0
5HT1F_HUMAN	38053	Cardiac disorder signs and symptoms	542853	3549	1.1678899999999999	0.0	0.0
5HT1F_HUMAN	38053	Cardiac neoplasms	331	3	1.62321	0.43963	0.2029429868536907
5HT1F_HUMAN	38053	Cardiac therapeutic procedures	10242	35	0.60855	0.0022199999999999998	0.0015530462549459701
5HT1F_HUMAN	38053	Cardiac valve disorders	19057	170	1.5974	0.0	0.0
5HT1F_HUMAN	38053	Central nervous system infections and inflammations	19686	124	1.12496	0.19633	0.10089826388495406
5HT1F_HUMAN	38053	Central nervous system vascular disorders	172365	1167	1.20976	0.0	0.0
5HT1F_HUMAN	38053	Cervix disorders (excl infections and inflammations)	4159	43	1.85405	0.00022999999999999998	0.00017727037109424788
5HT1F_HUMAN	38053	Changes in physical activity	34687	260	1.3403	1e-05	8.460741970690573e-06
5HT1F_HUMAN	38053	Chemical injury and poisoning	123001	795	1.15452	7e-05	5.618385189904781e-05
5HT1F_HUMAN	38053	Chlamydial infectious disorders	522	2	0.68258	1.0	0.39291113796942484
5HT1F_HUMAN	38053	Chromosomal abnormalities and abnormal gene carriers	2430	27	1.99406	0.00098	0.0007127644219203567
5HT1F_HUMAN	38053	Coagulopathies and bleeding diatheses (excl thrombocytopenic)	42323	234	0.9866799999999999	0.87026	0.3584830120126258
5HT1F_HUMAN	38053	Cognitive and attention disorders and disturbances	66027	620	1.6822700000000002	0.0	0.0
5HT1F_HUMAN	38053	Communication disorders and disturbances	72637	672	1.6572	0.0	0.0
5HT1F_HUMAN	38053	Congenital and hereditary disorders NEC	10074	61	1.08117	0.5471699999999999	0.24381749178322448
5HT1F_HUMAN	38053	Congenital and peripartum neurological conditions	4994	29	1.03659	0.84915	0.3510547654861206
5HT1F_HUMAN	38053	Congenital cardiac disorders	6451	40	1.1072899999999999	0.50371	0.2278412369900109
5HT1F_HUMAN	38053	Congenital ear disorders (excl deafness)	1075	1	0.16524	0.03709	0.022064638209675726
5HT1F_HUMAN	38053	Congenital eye disorders (excl glaucoma)	886	5	1.00722	0.8229799999999999	0.34203313828544196
5HT1F_HUMAN	38053	Congenital reproductive tract and breast disorders	1844	19	1.84765	0.01174	0.007526013358306534
5HT1F_HUMAN	38053	Congenital respiratory tract disorders	1190	11	1.6558	0.11366	0.06181507576257263
5HT1F_HUMAN	38053	Connective tissue disorders (excl congenital)	21636	141	1.16415	0.07504	0.04233746166622086
5HT1F_HUMAN	38053	Cornification and dystrophic skin disorders	9417	68	1.29084	0.03815	0.022646209929709286
5HT1F_HUMAN	38053	Coronary artery disorders	278562	2162	1.38818	0.0	0.0
5HT1F_HUMAN	38053	Cranial nerve disorders (excl neoplasms)	52382	485	1.65855	0.0	0.0
5HT1F_HUMAN	38053	Cutaneous neoplasms benign	5790	43	1.32787	0.07702	0.0433429544650779
5HT1F_HUMAN	38053	Cytogenetic investigations	573	2	0.62162	0.77695	0.3262244057125663
5HT1F_HUMAN	38053	Cytoplasmic disorders congenital	378	9	4.32857	0.00033999999999999997	0.00025795712146687075
5HT1F_HUMAN	38053	Decreased and nonspecific blood pressure disorders and shock	378305	2703	1.27716	0.0	0.0
5HT1F_HUMAN	38053	Deliria (incl confusion)	90586	891	1.7629400000000002	0.0	0.0
5HT1F_HUMAN	38053	Dementia and amnestic conditions	87697	753	1.53703	0.0	0.0
5HT1F_HUMAN	38053	Demyelinating disorders	52603	314	1.0657299999999998	0.25287	0.12623041487335848
5HT1F_HUMAN	38053	Dental and gingival conditions	47772	356	1.33246	0.0	0.0
5HT1F_HUMAN	38053	Depressed mood disorders and disturbances	141290	1365	1.73127	0.0	0.0
5HT1F_HUMAN	38053	Developmental disorders NEC	2757	21	1.36217	0.1585	0.08334125626829764
5HT1F_HUMAN	38053	Diabetic complications	17966	88	0.87356	0.22930999999999999	0.11580797242669576
5HT1F_HUMAN	38053	Dissociative disorders	2897	58	3.62569	0.0	0.0
5HT1F_HUMAN	38053	Disturbances in thinking and perception	62652	481	1.37305	0.0	0.0
5HT1F_HUMAN	38053	Diverticular disorders	15412	94	1.08907	0.38758000000000004	0.1821944388297183
5HT1F_HUMAN	38053	Ear and labyrinthine disorders congenital	1154	2	0.30811	0.10811	0.05905337677511051
5HT1F_HUMAN	38053	Eating disorders and disturbances	34169	209	1.0922100000000001	0.20335999999999999	0.10397911933659923
5HT1F_HUMAN	38053	Economic and housing issues	11788	80	1.21265	0.09486	0.052492614624325064
5HT1F_HUMAN	38053	Ectoparasitic disorders	616	3	0.86854	1.0	0.39291113796942484
5HT1F_HUMAN	38053	Electrolyte and fluid balance conditions	261572	1364	0.9303	0.00643	0.0042607358377533275
5HT1F_HUMAN	38053	Embolism and thrombosis	148186	1405	1.6987700000000001	0.0	0.0
5HT1F_HUMAN	38053	Encephalopathies	21467	132	1.09802	0.27187	0.134348590513343
5HT1F_HUMAN	38053	Endocardial disorders	3205	16	0.8904200000000001	0.81205	0.3380513367756741
5HT1F_HUMAN	38053	Endocrine and glandular disorders NEC	616	2	0.57808	0.78228	0.3278776310864452
5HT1F_HUMAN	38053	Endocrine disorders congenital	383	4	1.87305	0.16967000000000002	0.0885875164060881
5HT1F_HUMAN	38053	Endocrine disorders of gonadal function	47601	130	0.48601000000000005	0.0	0.0
5HT1F_HUMAN	38053	Endocrine gland therapeutic procedures	1573	10	1.13545	0.61148	0.2678057702986552
5HT1F_HUMAN	38053	Endocrine investigations (incl sex hormones)	25080	140	0.99623	1.0	0.39291113796942484
5HT1F_HUMAN	38053	Endocrine neoplasms benign	2304	23	1.7895	0.01081	0.006961467459990628
5HT1F_HUMAN	38053	Endocrine neoplasms malignant and unspecified	9017	59	1.16888	0.22953	0.11590036353919043
5HT1F_HUMAN	38053	Environmental issues	573	2	0.62162	0.77695	0.3262244057125663
5HT1F_HUMAN	38053	Enzyme investigations NEC	43698	302	1.23505	0.00036	0.0002726156980287711
5HT1F_HUMAN	38053	Epidermal and dermal conditions	666415	4359	1.16848	0.0	0.0
5HT1F_HUMAN	38053	Exocrine pancreas conditions	41247	241	1.04303	0.50807	0.22943579007114798
5HT1F_HUMAN	38053	External ear disorders (excl congenital)	2702	18	1.1902	0.43746999999999997	0.2020867915495253
5HT1F_HUMAN	38053	Eye disorders NEC	66383	432	1.16249	0.0022199999999999998	0.0015530462549459701
5HT1F_HUMAN	38053	Eye disorders congenital	1921	9	0.8353799999999999	0.75857	0.31982153116720125
5HT1F_HUMAN	38053	Eye therapeutic procedures	5660	24	0.75573	0.1817	0.09421720015778912
5HT1F_HUMAN	38053	Family issues	5040	32	1.134	0.44966999999999996	0.20690687304051378
5HT1F_HUMAN	38053	Fatal outcomes	307071	469	0.27147	0.0	0.0
5HT1F_HUMAN	38053	Female reproductive tract infections and inflammations	8399	77	1.6420700000000001	5e-05	4.057040105205715e-05
5HT1F_HUMAN	38053	Foetal and neonatal investigations	1607	6	0.6651	0.40243	0.18792553596803754
5HT1F_HUMAN	38053	Foetal complications	14238	86	1.07847	0.46495	0.21272467489230332
5HT1F_HUMAN	38053	Food intolerance syndromes	8964	89	1.77971	0.0	0.0
5HT1F_HUMAN	38053	Fractures	96081	486	0.9022600000000001	0.022269999999999998	0.013706056781478163
5HT1F_HUMAN	38053	Fungal infectious disorders	46404	236	0.9071899999999999	0.14235	0.07571897322214012
5HT1F_HUMAN	38053	Gallbladder disorders	36730	606	2.9771799999999997	0.0	0.0
5HT1F_HUMAN	38053	Gastrointestinal conditions NEC	58886	360	1.09165	0.09619	0.053168908336329666
5HT1F_HUMAN	38053	Gastrointestinal haemorrhages NEC	104328	373	0.63678	0.0	0.0
5HT1F_HUMAN	38053	Gastrointestinal infections	49172	226	0.81944	0.0021899999999999997	0.0015331352269218894
5HT1F_HUMAN	38053	Gastrointestinal inflammatory conditions	71493	543	1.35824	0.0	0.0
5HT1F_HUMAN	38053	Gastrointestinal investigations	10977	69	1.1226200000000002	0.33653	0.16169213451004905
5HT1F_HUMAN	38053	Gastrointestinal motility and defaecation conditions	305542	1811	1.05818	0.01457	0.009216566817544618
5HT1F_HUMAN	38053	Gastrointestinal neoplasms benign	8328	57	1.22305	0.14089000000000002	0.0750969540969541
5HT1F_HUMAN	38053	Gastrointestinal neoplasms malignant and unspecified	30233	72	0.42366000000000004	0.0	0.0
5HT1F_HUMAN	38053	Gastrointestinal signs and symptoms	677692	5254	1.38665	0.0	0.0
5HT1F_HUMAN	38053	Gastrointestinal stenosis and obstruction	31359	146	0.8301299999999999	0.022869999999999998	0.014050728171780802
5HT1F_HUMAN	38053	Gastrointestinal therapeutic procedures	16874	76	0.80294	0.0559	0.032254582005331094
5HT1F_HUMAN	38053	Gastrointestinal tract disorders congenital	5083	42	1.4786299999999999	0.01436	0.009089939630805738
5HT1F_HUMAN	38053	Gastrointestinal ulceration and perforation	41810	224	0.95594	0.53227	0.23856343241173128
5HT1F_HUMAN	38053	Gastrointestinal vascular conditions	17715	155	1.5665200000000001	0.0	0.0
5HT1F_HUMAN	38053	Gender related factors	644	5	1.38866	0.41908999999999996	0.1947478161520214
5HT1F_HUMAN	38053	General system disorders NEC	1483087	9911	1.1939600000000001	0.0	0.0
5HT1F_HUMAN	38053	Genitourinary tract disorders NEC	66124	432	1.16708	0.0016699999999999998	0.0011842860382020187
5HT1F_HUMAN	38053	Glaucoma and ocular hypertension	9263	84	1.6241	4e-05	3.2663203478793225e-05
5HT1F_HUMAN	38053	Glucose metabolism disorders (incl diabetes mellitus)	103625	467	0.80342	0.0	0.0
5HT1F_HUMAN	38053	Gonadotrophin and sex hormone changes	291	3	1.8486599999999997	0.22428	0.11352558793655754
5HT1F_HUMAN	38053	Haematological and lymphoid tissue therapeutic procedures	24446	99	0.72164	0.0008	0.0005869695351809608
5HT1F_HUMAN	38053	Haematological disorders NEC	10574	43	0.72465	0.03137	0.018864887981276064
5HT1F_HUMAN	38053	Haematology investigations (incl blood groups)	191896	712	0.66093	0.0	0.0
5HT1F_HUMAN	38053	Haematopoietic neoplasms (excl leukaemias and lymphomas)	7665	23	0.53413	0.00124	0.0008912662751903891
5HT1F_HUMAN	38053	Haemoglobinopathies	2301	4	0.30905	0.00746	0.004907894736842105
5HT1F_HUMAN	38053	Haemolyses and related conditions	29699	114	0.68385	2e-05	1.6652132005324277e-05
5HT1F_HUMAN	38053	Head and neck therapeutic procedures	13635	117	1.53604	2e-05	1.6652132005324277e-05
5HT1F_HUMAN	38053	Headaches	258675	5447	3.81745	0.0	0.0
5HT1F_HUMAN	38053	Hearing disorders	28721	244	1.52063	0.0	0.0
5HT1F_HUMAN	38053	Heart failures	230830	918	0.7086100000000001	0.0	0.0
5HT1F_HUMAN	38053	Helminthic disorders	741	3	0.72143	0.80465	0.335622367235068
5HT1F_HUMAN	38053	Hepatic and biliary neoplasms benign	3244	43	2.38403	0.0	0.0
5HT1F_HUMAN	38053	Hepatic and hepatobiliary disorders	160023	928	1.03519	0.28569	0.14010090671684156
5HT1F_HUMAN	38053	Hepatobiliary disorders congenital	190	7	6.78852	0.00011	8.703807097742262e-05
5HT1F_HUMAN	38053	Hepatobiliary investigations	97697	663	1.2126	0.0	0.0
5HT1F_HUMAN	38053	Hepatobiliary neoplasms	12957	46	0.6323	0.00116	0.0008362569845723415
5HT1F_HUMAN	38053	Hepatobiliary neoplasms malignant and unspecified	5969	19	0.56672	0.00908	0.005908286103737714
5HT1F_HUMAN	38053	Hepatobiliary therapeutic procedures	11256	153	2.44557	0.0	0.0
5HT1F_HUMAN	38053	Hypothalamus and pituitary gland disorders	15821	103	1.16297	0.13497	0.07227063900630505
5HT1F_HUMAN	38053	Immune disorders NEC	75386	345	0.81592	0.0001	7.937063549013775e-05
5HT1F_HUMAN	38053	Immune system disorders congenital	214	1	0.8332	1.0	0.39291113796942484
5HT1F_HUMAN	38053	Immunodeficiency syndromes	11416	40	0.62402	0.0016600000000000002	0.001177507527470379
5HT1F_HUMAN	38053	Immunology and allergy investigations	18435	127	1.23109	0.022869999999999998	0.014050728171780802
5HT1F_HUMAN	38053	Impulse control disorders NEC	5185	41	1.4145299999999998	0.03175	0.019075447951511938
5HT1F_HUMAN	38053	Inborn errors of metabolism	1799	6	0.59388	0.26524000000000003	0.13148059812430318
5HT1F_HUMAN	38053	Increased intracranial pressure and hydrocephalus	13127	105	1.431	0.00053	0.00039523621594067055
5HT1F_HUMAN	38053	Infections - pathogen unspecified	549473	2761	0.8962600000000001	0.0	0.0
5HT1F_HUMAN	38053	Infections and infestations congenital	176	1	1.0141200000000001	0.62803	0.2740707714662381
5HT1F_HUMAN	38053	Injuries NEC	358480	2769	1.38151	0.0	0.0
5HT1F_HUMAN	38053	Injuries by physical agents	19040	252	2.3803900000000002	0.0	0.0
5HT1F_HUMAN	38053	Inner ear and VIIIth cranial nerve disorders	43066	422	1.7562400000000002	0.0	0.0
5HT1F_HUMAN	38053	Investigations, imaging and histopathology procedures NEC	28460	132	0.82696	0.02852	0.017258785303007052
5HT1F_HUMAN	38053	Iron and trace metal metabolism disorders	6559	61	1.6660099999999998	0.00023999999999999998	0.0001845793798173539
5HT1F_HUMAN	38053	Joint disorders	266568	1568	1.05009	0.0501	0.02915126476305339
5HT1F_HUMAN	38053	Legal issues	6758	51	1.3494899999999999	0.04079	0.024095694932916502
5HT1F_HUMAN	38053	Leukaemias	24571	36	0.2604	0.0	0.0
5HT1F_HUMAN	38053	Lifestyle issues	87109	772	1.5869	0.0	0.0
5HT1F_HUMAN	38053	Lipid analyses	35100	250	1.27311	0.00022	0.00016978370743495058
5HT1F_HUMAN	38053	Lipid metabolism disorders	26032	243	1.67225	0.0	0.0
5HT1F_HUMAN	38053	Lower respiratory tract disorders (excl obstruction and infection)	95545	408	0.7611	0.0	0.0
5HT1F_HUMAN	38053	Lymphatic vessel disorders	3609	23	1.1382700000000001	0.50247	0.22737446865832484
5HT1F_HUMAN	38053	Lymphomas NEC	6822	17	0.44335	0.00018	0.0001399727359242779
5HT1F_HUMAN	38053	Lymphomas non-Hodgkin's B-cell	4770	6	0.22351999999999997	0.0	0.0
5HT1F_HUMAN	38053	Lymphomas non-Hodgkin's T-cell	1988	5	0.44748000000000004	0.06932	0.03937896305946312
5HT1F_HUMAN	38053	Lymphomas non-Hodgkin's unspecified histology	2851	13	0.81294	0.53089	0.2380990486268382
5HT1F_HUMAN	38053	Malabsorption conditions	9598	73	1.36015	0.011179999999999999	0.00718718813789975
5HT1F_HUMAN	38053	Male genital tract therapeutic procedures	1263	4	0.56385	0.34210999999999997	0.16380132817407736
5HT1F_HUMAN	38053	Male reproductive tract infections and inflammations	3281	7	0.37944	0.00462	0.003113596171850619
5HT1F_HUMAN	38053	Malignant and unspecified neoplasms gastrointestinal NEC	32935	78	0.4213	0.0	0.0
5HT1F_HUMAN	38053	Manic and bipolar mood disorders and disturbances	15716	185	2.1139799999999997	0.0	0.0
5HT1F_HUMAN	38053	Maternal complications of labour and delivery	9293	55	1.05661	0.67607	0.29176999390951824
5HT1F_HUMAN	38053	Maternal complications of pregnancy	11186	73	1.1657899999999999	0.18320999999999998	0.09492366529950072
5HT1F_HUMAN	38053	Medication errors	467421	3624	1.3867200000000002	0.0	0.0
5HT1F_HUMAN	38053	Menopause and related conditions	26771	220	1.47052	0.0	0.0
5HT1F_HUMAN	38053	Menstrual cycle and uterine bleeding disorders	63922	274	0.764	0.0	0.0
5HT1F_HUMAN	38053	Mental impairment disorders	130571	1070	1.46635	0.0	0.0
5HT1F_HUMAN	38053	Metabolic and nutritional disorders congenital	2184	10	0.81634	0.66568	0.2881910416984879
5HT1F_HUMAN	38053	Metabolic, nutritional and blood gas investigations	148134	478	0.57452	0.0	0.0
5HT1F_HUMAN	38053	Metabolism disorders NEC	35688	283	1.41857	0.0	0.0
5HT1F_HUMAN	38053	Metastases	22915	79	0.61395	0.0	0.0
5HT1F_HUMAN	38053	Microbiology and serology investigations	19878	80	0.71713	0.00228	0.001592110125646711
5HT1F_HUMAN	38053	Middle ear disorders (excl congenital)	4329	54	2.24174	0.0	0.0
5HT1F_HUMAN	38053	Miscellaneous and site unspecified neoplasms benign	11196	112	1.79329	0.0	0.0
5HT1F_HUMAN	38053	Miscellaneous and site unspecified neoplasms malignant and unspecified	62091	167	0.47861000000000004	0.0	0.0
5HT1F_HUMAN	38053	Mood disorders and disturbances NEC	137071	1294	1.6913599999999998	0.0	0.0
5HT1F_HUMAN	38053	Movement disorders (incl parkinsonism)	180506	1396	1.38323	0.0	0.0
5HT1F_HUMAN	38053	Muscle disorders	305176	2305	1.35065	0.0	0.0
5HT1F_HUMAN	38053	Musculoskeletal and connective tissue deformities (incl intervertebral disc disorders)	36240	327	1.61594	0.0	0.0
5HT1F_HUMAN	38053	Musculoskeletal and connective tissue disorders NEC	339812	2438	1.2824799999999998	0.0	0.0
5HT1F_HUMAN	38053	Musculoskeletal and connective tissue disorders congenital	9356	64	1.2223600000000001	0.11058	0.06027298786680529
5HT1F_HUMAN	38053	Musculoskeletal and connective tissue neoplasms	12171	78	1.14469	0.22419	0.11348319855341805
5HT1F_HUMAN	38053	Musculoskeletal and soft tissue investigations (excl enzyme tests)	9375	60	1.14313	0.29839	0.14558898398541095
5HT1F_HUMAN	38053	Mycobacterial infectious disorders	12129	16	0.23442	0.0	0.0
5HT1F_HUMAN	38053	Mycoplasmal infectious disorders	604	6	1.78065	0.16047999999999998	0.08424610184402745
5HT1F_HUMAN	38053	Myocardial disorders	41763	251	1.07307	0.26347	0.1307482614666601
5HT1F_HUMAN	38053	Neonatal and perinatal conditions	30239	179	1.0568	0.46301000000000003	0.21198999994952022
5HT1F_HUMAN	38053	Neonatal respiratory disorders	5798	59	1.8245	2.9999999999999997e-05	2.4708510406450908e-05
5HT1F_HUMAN	38053	Neoplasm related morbidities	10712	58	0.96615	0.846	0.34991677573225954
5HT1F_HUMAN	38053	Neoplastic and ectopic endocrinopathies	2311	12	0.9263399999999999	1.0	0.39291113796942484
5HT1F_HUMAN	38053	Nephropathies	22120	75	0.60378	0.0	0.0
5HT1F_HUMAN	38053	Nervous system neoplasms benign	2453	31	2.27152	5.9999999999999995e-05	4.840172901435508e-05
5HT1F_HUMAN	38053	Nervous system neoplasms malignant and unspecified NEC	8242	52	1.1268	0.37522	0.17742701930546215
5HT1F_HUMAN	38053	Nervous system, skull and spine therapeutic procedures	6643	65	1.75367	2.9999999999999997e-05	2.4708510406450908e-05
5HT1F_HUMAN	38053	Neurological disorders NEC	938369	7240	1.3799299999999999	0.0	0.0
5HT1F_HUMAN	38053	Neurological disorders congenital	5222	31	1.05984	0.7103	0.30399963194005347
5HT1F_HUMAN	38053	Neurological disorders of the eye	119728	962	1.43751	0.0	0.0
5HT1F_HUMAN	38053	Neurological, special senses and psychiatric investigations	14203	121	1.52493	1e-05	8.460741970690573e-06
5HT1F_HUMAN	38053	Neuromuscular disorders	109514	1003	1.64042	0.0	0.0
5HT1F_HUMAN	38053	Obstetric and gynaecological therapeutic procedures	21059	148	1.25607	0.00725	0.004777429854259601
5HT1F_HUMAN	38053	Ocular haemorrhages and vascular disorders NEC	10897	37	0.60464	0.0012699999999999999	0.0009118825205826472
5HT1F_HUMAN	38053	Ocular infections, irritations and inflammations	73378	309	0.7505	0.0	0.0
5HT1F_HUMAN	38053	Ocular injuries	3510	21	1.06819	0.73355	0.3115131800730406
5HT1F_HUMAN	38053	Ocular neoplasms	834	6	1.2860200000000002	0.48096000000000005	0.2189924246607664
5HT1F_HUMAN	38053	Ocular neuromuscular disorders	27471	267	1.74183	0.0	0.0
5HT1F_HUMAN	38053	Ocular sensory symptoms NEC	13075	190	2.6169599999999997	0.0	0.0
5HT1F_HUMAN	38053	Ocular structural change, deposit and degeneration NEC	23238	135	1.03704	0.65969	0.2860688901744606
5HT1F_HUMAN	38053	Oral soft tissue conditions	152627	984	1.1516	1e-05	8.460741970690573e-06
5HT1F_HUMAN	38053	Ovarian and fallopian tube disorders	13507	99	1.31039	0.0093	0.006044196994776327
5HT1F_HUMAN	38053	Parathyroid gland disorders	8837	65	1.31505	0.03205	0.019241795411520185
5HT1F_HUMAN	38053	Penile and scrotal disorders (excl infections and inflammations)	7478	17	0.40437	2e-05	1.6652132005324277e-05
5HT1F_HUMAN	38053	Pericardial disorders	14148	75	0.94581	0.69289	0.2978385386059032
5HT1F_HUMAN	38053	Peripheral neuropathies	53974	355	1.175	0.00285	0.001971273001807353
5HT1F_HUMAN	38053	Peritoneal and retroperitoneal conditions	33282	111	0.59387	0.0	0.0
5HT1F_HUMAN	38053	Personality disorders and disturbances in behaviour	71406	492	1.23129	1e-05	8.460741970690573e-06
5HT1F_HUMAN	38053	Physical examination topics	207297	1315	1.13299	1e-05	8.460741970690573e-06
5HT1F_HUMAN	38053	Pigmentation disorders	7098	21	0.52662	0.0018100000000000002	0.0012784695776775774
5HT1F_HUMAN	38053	Placental, amniotic and cavity disorders (excl haemorrhages)	4396	42	1.7119400000000002	0.0011300000000000001	0.0008160111464968154
5HT1F_HUMAN	38053	Plasma cell neoplasms	16095	25	0.27609	0.0	0.0
5HT1F_HUMAN	38053	Platelet disorders	51325	216	0.7500399999999999	1e-05	8.460741970690573e-06
5HT1F_HUMAN	38053	Pleural disorders	38350	173	0.8042199999999999	0.00352	0.0024061437819831635
5HT1F_HUMAN	38053	Postpartum and puerperal disorders	2081	19	1.6352799999999998	0.03852	0.02285044180068935
5HT1F_HUMAN	38053	Pregnancy, labour, delivery and postpartum conditions	62379	343	0.98125	0.74646	0.31566543267437525
5HT1F_HUMAN	38053	Procedural and device related injuries and complications NEC	236255	1796	1.3594600000000001	0.0	0.0
5HT1F_HUMAN	38053	Product quality issues	147837	2249	2.74152	0.0	0.0
5HT1F_HUMAN	38053	Prostatic disorders (excl infections and inflammations)	14623	39	0.47458999999999996	0.0	0.0
5HT1F_HUMAN	38053	Protein and amino acid metabolism disorders NEC	7094	31	0.77893	0.17606	0.09161689749738952
5HT1F_HUMAN	38053	Protein and chemistry analyses NEC	21380	158	1.3212899999999999	0.00079	0.0005799420486920487
5HT1F_HUMAN	38053	Protozoal infectious disorders	2491	5	0.35694000000000004	0.01031	0.00666341494698438
5HT1F_HUMAN	38053	Psychiatric and behavioural symptoms NEC	45982	526	2.05363	0.0	0.0
5HT1F_HUMAN	38053	Psychiatric disorders NEC	182062	1566	1.53976	0.0	0.0
5HT1F_HUMAN	38053	Psychiatric therapeutic procedures	163	2	2.2046099999999997	0.2323	0.11713343006610073
5HT1F_HUMAN	38053	Pulmonary vascular disorders	69879	701	1.79837	0.0	0.0
5HT1F_HUMAN	38053	Purine and pyrimidine metabolism disorders	9204	25	0.48336	5.9999999999999995e-05	4.840172901435508e-05
5HT1F_HUMAN	38053	Red blood cell disorders	2744	20	1.30302	0.24670999999999998	0.1234666236288596
5HT1F_HUMAN	38053	Renal and urinary tract disorders congenital	2883	26	1.61507	0.0233	0.01429177177095943
5HT1F_HUMAN	38053	Renal and urinary tract investigations and urinalyses	62571	309	0.88077	0.025490000000000002	0.015538504449283546
5HT1F_HUMAN	38053	Renal and urinary tract neoplasms benign	4296	36	1.49976	0.01853	0.01154029594534281
5HT1F_HUMAN	38053	Renal and urinary tract neoplasms malignant and unspecified	22349	37	0.2943	0.0	0.0
5HT1F_HUMAN	38053	Renal and urinary tract therapeutic procedures	4374	16	0.65157	0.08501	0.047449242452214796
5HT1F_HUMAN	38053	Renal disorders (excl nephropathies)	225563	1133	0.89594	0.00014	0.00010982908939939107
5HT1F_HUMAN	38053	Reproductive neoplasms female benign	11166	110	1.7657200000000002	0.0	0.0
5HT1F_HUMAN	38053	Reproductive neoplasms female malignant and unspecified	9156	52	1.01368	0.88851	0.36497297162654835
5HT1F_HUMAN	38053	Reproductive neoplasms male benign	276	2	1.29541	0.67018	0.289713295712352
5HT1F_HUMAN	38053	Reproductive neoplasms male malignant and unspecified	9477	20	0.37532	0.0	0.0
5HT1F_HUMAN	38053	Reproductive organ and breast investigations (excl hormone analyses)	3355	17	0.90384	0.81643	0.33962996716078375
5HT1F_HUMAN	38053	Reproductive tract and breast disorders congenital	2630	21	1.42848	0.11427999999999999	0.06212842628944766
5HT1F_HUMAN	38053	Reproductive tract disorders NEC	24102	149	1.10396	0.22598000000000001	0.11430061342850771
5HT1F_HUMAN	38053	Respiratory and mediastinal neoplasms benign (excl mesotheliomas)	1520	13	1.53094	0.12075	0.06536532160357145
5HT1F_HUMAN	38053	Respiratory and mediastinal neoplasms malignant and unspecified	23789	62	0.46374	0.0	0.0
5HT1F_HUMAN	38053	Respiratory and pulmonary investigations (excl blood gases)	7246	35	0.86139	0.43056000000000005	0.19934656123818909
5HT1F_HUMAN	38053	Respiratory disorders NEC	618843	4378	1.26447	0.0	0.0
5HT1F_HUMAN	38053	Respiratory disorders congenital	2995	23	1.37343	0.13935	0.0743547590053123
5HT1F_HUMAN	38053	Respiratory tract infections	317629	1638	0.91996	0.0005	0.0003736477412231917
5HT1F_HUMAN	38053	Respiratory tract neoplasms	27308	67	0.4365	0.0	0.0
5HT1F_HUMAN	38053	Respiratory tract therapeutic procedures	5830	23	0.70292	0.09487000000000001	0.05249782802337926
5HT1F_HUMAN	38053	Retina, choroid and vitreous haemorrhages and vascular disorders	11953	63	0.94034	0.66791	0.28897302002986114
5HT1F_HUMAN	38053	Rickettsial infectious disorders	359	2	0.99424	1.0	0.39291113796942484
5HT1F_HUMAN	38053	Salivary gland conditions	44406	299	1.20307	0.0017699999999999999	0.0012516782448015343
5HT1F_HUMAN	38053	Schizophrenia and other psychotic disorders	20418	132	1.1548	0.10017999999999999	0.05515053260902552
5HT1F_HUMAN	38053	Seizures (incl subtypes)	107497	888	1.47825	0.0	0.0
5HT1F_HUMAN	38053	Sexual dysfunctions, disturbances and gender identity disorders	30237	120	0.70713	7e-05	5.618385189904781e-05
5HT1F_HUMAN	38053	Sexual function and fertility disorders	33222	117	0.62722	0.0	0.0
5HT1F_HUMAN	38053	Skeletal neoplasms benign	945	10	1.89809	0.04829	0.028170383138558908
5HT1F_HUMAN	38053	Skeletal neoplasms malignant and unspecified	2424	12	0.88294	0.7855	0.32895396620186534
5HT1F_HUMAN	38053	Skin and subcutaneous tissue disorders NEC	39119	141	0.64199	0.0	0.0
5HT1F_HUMAN	38053	Skin and subcutaneous tissue disorders congenital	1516	7	0.82326	0.7318600000000001	0.31106456767445784
5HT1F_HUMAN	38053	Skin and subcutaneous tissue infections and infestations	67121	369	0.98105	0.73552	0.3121115732445039
5HT1F_HUMAN	38053	Skin and subcutaneous tissue therapeutic procedures	1668	8	0.8552799999999999	0.8687299999999999	0.3579454272059892
5HT1F_HUMAN	38053	Skin appendage conditions	152879	1075	1.25676	0.0	0.0
5HT1F_HUMAN	38053	Skin neoplasms malignant and unspecified	17465	72	0.7346600000000001	0.0071	0.004682532757442229
5HT1F_HUMAN	38053	Skin vascular abnormalities	90266	586	1.1596600000000001	0.00042	0.0003161196630845193
5HT1F_HUMAN	38053	Sleep disorders and disturbances	263347	2256	1.53347	0.0	0.0
5HT1F_HUMAN	38053	Sleep disturbances (incl subtypes)	163046	1375	1.50938	0.0	0.0
5HT1F_HUMAN	38053	Soft tissue neoplasms benign	3879	39	1.80244	0.00074	0.0005447005356273331
5HT1F_HUMAN	38053	Soft tissue neoplasms malignant and unspecified (excl sarcomas)	179	1	0.99703	1.0	0.39291113796942484
5HT1F_HUMAN	38053	Soft tissue sarcomas	2342	8	0.6083	0.20936	0.1066848997983044
5HT1F_HUMAN	38053	Soft tissue therapeutic procedures	853	13	2.74658	0.00132	0.0009464647103465723
5HT1F_HUMAN	38053	Somatoform and factitious disorders	9613	144	2.6989	0.0	0.0
5HT1F_HUMAN	38053	Spinal cord and nerve root disorders	19777	196	1.7764400000000002	0.0	0.0
5HT1F_HUMAN	38053	Spleen, lymphatic and reticuloendothelial system disorders	31984	226	1.26294	0.00072	0.000530611913254735
5HT1F_HUMAN	38053	Structural brain disorders	12793	149	2.09137	0.0	0.0
5HT1F_HUMAN	38053	Suicidal and self-injurious behaviours NEC	110356	741	1.19971	0.0	0.0
5HT1F_HUMAN	38053	Synovial and bursal disorders	8642	77	1.59548	0.00011999999999999999	9.468135080119003e-05
5HT1F_HUMAN	38053	Tendon, ligament and cartilage disorders	31005	222	1.27988	0.00037999999999999997	0.0002871783762165044
5HT1F_HUMAN	38053	Testicular and epididymal disorders	3796	11	0.51577	0.02179	0.013432881572508293
5HT1F_HUMAN	38053	Therapeutic and nontherapeutic effects (excl toxicity)	684282	7693	2.0179	0.0	0.0
5HT1F_HUMAN	38053	Therapeutic procedures and supportive care NEC	180894	957	0.94389	0.07124	0.0403824082696382
5HT1F_HUMAN	38053	Thoracic disorders (excl lung and pleura)	13512	121	1.60362	0.0	0.0
5HT1F_HUMAN	38053	Thyroid gland disorders	31831	253	1.42188	0.0	0.0
5HT1F_HUMAN	38053	Tissue disorders NEC	48298	287	1.0608899999999999	0.31268	0.1515212241343385
5HT1F_HUMAN	38053	Tongue conditions	74655	554	1.32683	0.0	0.0
5HT1F_HUMAN	38053	Toxicology and therapeutic drug monitoring	32361	253	1.39841	0.0	0.0
5HT1F_HUMAN	38053	Upper respiratory tract disorders (excl infections)	101683	676	1.18775	1e-05	8.460741970690573e-06
5HT1F_HUMAN	38053	Ureteric disorders	2247	66	5.37052	0.0	0.0
5HT1F_HUMAN	38053	Urethral disorders (excl calculi)	2892	34	2.11128	8e-05	6.395487197567318e-05
5HT1F_HUMAN	38053	Urinary tract signs and symptoms	122022	872	1.27738	0.0	0.0
5HT1F_HUMAN	38053	Urolithiases	17054	134	1.40551	0.00016999999999999999	0.0001324110332508931
5HT1F_HUMAN	38053	Uterine, pelvic and broad ligament disorders	25740	257	1.78983	0.0	0.0
5HT1F_HUMAN	38053	Vascular disorders NEC	279434	4239	2.7337	0.0	0.0
5HT1F_HUMAN	38053	Vascular haemorrhagic disorders	417455	2376	1.01588	0.4284	0.19852485400285094
5HT1F_HUMAN	38053	Vascular hypertensive disorders	113157	805	1.27158	0.0	0.0
5HT1F_HUMAN	38053	Vascular inflammations	15808	99	1.11845	0.26236	0.13027297263266233
5HT1F_HUMAN	38053	Vascular injuries	2240	16	1.2767700000000002	0.31893	0.15423265299593716
5HT1F_HUMAN	38053	Vascular therapeutic procedures	15423	50	0.57722	2.9999999999999997e-05	2.4708510406450908e-05
5HT1F_HUMAN	38053	Venous varices	15997	110	1.22879	0.033780000000000004	0.020215399841646876
5HT1F_HUMAN	38053	Viral infectious disorders	124351	606	0.86911	0.00042	0.0003161196630845193
5HT1F_HUMAN	38053	Vision disorders	144791	1037	1.28023	0.0	0.0
5HT1F_HUMAN	38053	Vitamin related disorders	8302	100	2.16376	0.0	0.0
5HT1F_HUMAN	38053	Vulvovaginal disorders (excl infections and inflammations)	32718	150	0.81739	0.0128	0.008167377203720119
5HT1F_HUMAN	38053	Water, electrolyte and mineral investigations	48785	297	1.08705	0.15242999999999998	0.08043869672727272
5HT1F_HUMAN	38053	White blood cell disorders	105036	431	0.73123	0.0	0.0
5HT2A_HUMAN	553385	Abdominal hernias and other abdominal wall conditions	16184	1984	1.5749600000000001	0.0	0.0
5HT2A_HUMAN	553385	Abortions and stillbirth	27420	1687	0.739	0.0	0.0
5HT2A_HUMAN	553385	Acid-base disorders	59306	8048	1.76988	0.0	0.0
5HT2A_HUMAN	553385	Adjustment disorders (incl subtypes)	952	254	4.102	0.0	0.0
5HT2A_HUMAN	553385	Administration site reactions	325762	11334	0.40633	0.0	0.0
5HT2A_HUMAN	553385	Adrenal gland disorders	8941	904	1.2679200000000002	0.0	0.0
5HT2A_HUMAN	553385	Age related factors	1700	207	1.56289	0.0	0.0
5HT2A_HUMAN	553385	Allergic conditions	330561	21656	0.7902600000000001	0.0	0.0
5HT2A_HUMAN	553385	Anaemias nonhaemolytic and marrow depression	127438	11265	1.0930600000000001	0.0	0.0
5HT2A_HUMAN	553385	Anal and rectal conditions NEC	13492	854	0.76172	0.0	0.0
5HT2A_HUMAN	553385	Ancillary infectious topics	26835	2300	1.05672	0.011890000000000001	0.007616465735816542
5HT2A_HUMAN	553385	Aneurysms and artery dissections	10593	887	1.03015	0.39364	0.18447711807044648
5HT2A_HUMAN	553385	Angioedema and urticaria	115947	6364	0.65464	0.0	0.0
5HT2A_HUMAN	553385	Anterior eye structural change, deposit and degeneration	28519	2078	0.8859	0.0	0.0
5HT2A_HUMAN	553385	Anxiety disorders and symptoms	214467	41764	2.7259599999999997	0.0	0.0
5HT2A_HUMAN	553385	Appetite and general nutritional disorders	157395	25309	2.15991	0.0	0.0
5HT2A_HUMAN	553385	Arteriosclerosis, stenosis, vascular insufficiency and necrosis	300539	22007	0.89064	0.0	0.0
5HT2A_HUMAN	553385	Aural disorders NEC	22997	1947	1.04263	0.07797	0.04382291447197194
[truncated: 228,842 more rows]
