# Supplementary material for: In Silico Profiling of Clinical Phenotypes for Human Targets Using Adverse Event Data
Source: High Throughput. 2018 Nov 23;7(4):37. doi: 10.3390/ht7040037 (PMC6306940; doi:10.3390/ht7040037)
Supplement: Supplementary file 1 [file high-throughput-07-00037-s001.zip › high-throughput-385126-suppl-final/Supplementary_File_2.txt]

SWISSPROT_ID	TARGET_CASE_COUNT	REACTION_NAME	REACTION_CASE_COUNT	NUM_CASES_TARGET_AND_REACTION	P-value Fisher Exact Test (two tailed)	Q-Value (Based on Fisher Exact Test)	PRR
GBRR3_HUMAN	111320	Abdominal adhesions	1545	55	1.9274371604683512e-07	5.306364224892427e-07	2.215046953338462
GBRR3_HUMAN	111320	Abdominal hernia	1888	63	2.6012091565920235e-07	7.080428426327577e-07	2.0714964633612096
GBRR3_HUMAN	111320	Abdominal mass	1075	35	0.00016777741484584317	0.00033584552315871484	2.0194877380524616
GBRR3_HUMAN	111320	Abdominal tenderness	2415	96	1.6597647770446867e-14	7.18421467664525e-14	2.484145330710993
GBRR3_HUMAN	111320	Abdominal wall haematoma	733	24	0.0018362634867691782	0.003116436744012472	2.03128808953413
GBRR3_HUMAN	111320	Abnormal behaviour	22907	1007	3.029397408355115e-164	9.946359155110046e-163	2.7592552097946275
GBRR3_HUMAN	111320	Abnormal sleep-related event	713	34	5.982762865728608e-08	1.7193768457452753e-07	3.0048006066709463
GBRR3_HUMAN	111320	Abscess jaw	623	33	7.89677494001828e-09	2.4320525038087936e-08	3.35635928183828
GBRR3_HUMAN	111320	Accident	3949	152	7.622562108839426e-21	4.286083837519972e-20	2.4022019009844846
GBRR3_HUMAN	111320	Accident at work	915	36	2.6037913972078314e-06	6.448179672566214e-06	2.457650606620646
GBRR3_HUMAN	111320	Accidental death	1062	153	1.033648790664079e-91	1.9451582757232525e-90	10.10029510856224
GBRR3_HUMAN	111320	Accidental overdose	12741	656	3.71000346172207e-138	1.0297900294804911e-136	3.2573445579736657
GBRR3_HUMAN	111320	Acidosis	3652	223	2.309170757521699e-60	3.024433280629078e-59	3.9025088214733734
GBRR3_HUMAN	111320	Actinic keratosis	936	44	1.1926084793810866e-09	3.895907610142054e-09	2.9600179017706805
GBRR3_HUMAN	111320	Actinomycosis	605	29	4.802632337720416e-07	1.2772364940520068e-06	3.021217766848325
GBRR3_HUMAN	111320	Activated partial thromboplastin time prolonged	3499	154	1.0210241943165778e-26	6.905454906727372e-26	2.762683374985968
GBRR3_HUMAN	111320	Acute abdomen	747	28	7.028943177526481e-05	0.0001480291173062218	2.3368759361052125
GBRR3_HUMAN	111320	Acute generalised exanthematous pustulosis	2581	106	8.019069444801467e-17	3.863366219633034e-16	2.5700239912600673
GBRR3_HUMAN	111320	Acute prerenal failure	1168	57	1.1337153608786164e-12	4.45720333307113e-12	3.0786995785457094
GBRR3_HUMAN	111320	Acute psychosis	1090	79	3.466436433135531e-27	2.3781412351704066e-26	4.689023952476762
GBRR3_HUMAN	111320	Acute pulmonary oedema	2866	163	7.727071205798785e-41	7.3048504316052595e-40	3.6186624528793745
GBRR3_HUMAN	111320	Acute respiratory distress syndrome	7488	373	1.346680449006127e-75	2.1453126907806794e-74	3.1458676170878865
GBRR3_HUMAN	111320	Acute respiratory failure	5893	275	6.746408935277952e-51	7.642779675524237e-50	2.937362015374073
GBRR3_HUMAN	111320	Acute sinusitis	929	45	3.0833706651356526e-10	1.0479819879234715e-09	3.054687334869269
GBRR3_HUMAN	111320	Adhesion	892	35	3.7772708799020335e-06	9.199678027555843e-06	2.4507202422106884
GBRR3_HUMAN	111320	Adjustment disorder	510	48	8.588846592554527e-22	4.9876005711088135e-21	6.234559547531161
GBRR3_HUMAN	111320	Adrenal disorder	686	26	0.00011036106793843657	0.00022651914246250195	2.363937161772232
GBRR3_HUMAN	111320	Adrenal insufficiency	2535	85	2.5127147044916837e-09	8.029445024880198e-09	2.0818975631934413
GBRR3_HUMAN	111320	Affect lability	3286	145	2.2924078787297065e-25	1.4911535461230745e-24	2.7701710183136505
GBRR3_HUMAN	111320	Affective disorder	2534	125	3.455744695711989e-26	2.302131426753318e-25	3.1137212352110537
GBRR3_HUMAN	111320	Aggression	25619	1357	3.098727293589656e-296	1.8630690402422467e-294	3.35629220881411
GBRR3_HUMAN	111320	Agitation	35271	2123	0.0	0.0	3.8432548109782885
GBRR3_HUMAN	111320	Agitation neonatal	554	44	2.503245004018222e-17	1.2321875261290967e-16	5.1771293497636215
GBRR3_HUMAN	111320	Agoraphobia	591	107	3.413334567022795e-75	5.411548594292071e-74	13.266150855400113
GBRR3_HUMAN	111320	Agranulocytosis	6011	298	2.390593369470408e-60	3.1300250070611017e-59	3.130102471942281
GBRR3_HUMAN	111320	Akathisia	5944	270	6.76572715288894e-48	7.303042237676138e-47	2.855492002845718
GBRR3_HUMAN	111320	Akinesia	855	67	3.443225345989355e-25	2.227809398377856e-24	5.1021720662616215
GBRR3_HUMAN	111320	Alanine aminotransferase increased	32156	1224	6.501085765133401e-152	1.977450235241882e-150	2.3745424165739237
GBRR3_HUMAN	111320	Alcohol abuse	1090	81	1.5047839725554454e-28	1.0730942853280444e-27	4.817263119171439
GBRR3_HUMAN	111320	Alcohol interaction	850	44	6.114896343214468e-11	2.1710626608260858e-10	3.2758510773938543
GBRR3_HUMAN	111320	Alcohol poisoning	1356	135	4.807378361509673e-61	6.358813118644859e-60	6.634750869838904
GBRR3_HUMAN	111320	Alcohol use	3207	225	1.6239965249636261e-71	2.464328197137218e-70	4.52773910802219
GBRR3_HUMAN	111320	Alcoholism	1478	100	1.5143898515608799e-31	1.167030915277775e-30	4.3546905402748495
GBRR3_HUMAN	111320	Altered state of consciousness	7348	579	6.169942644479242e-205	2.511544856507787e-203	5.132873546823419
GBRR3_HUMAN	111320	Alveolitis	907	30	0.0003596570152609199	0.0006859791542794462	2.0527127358604593
GBRR3_HUMAN	111320	Ammonia increased	2370	86	3.845256502627696e-11	1.3825393952538823e-10	2.259481902569579
GBRR3_HUMAN	111320	Amnesia	30172	1257	7.488903403855069e-186	2.757260763124885e-184	2.6086667129776653
GBRR3_HUMAN	111320	Anaemia macrocytic	948	58	4.9159391149986605e-17	2.38994385797626e-16	3.9106099633812024
GBRR3_HUMAN	111320	Anaemia of chronic disease	576	30	5.2783483080625985e-08	1.5236746562503276e-07	3.2971228376366715
GBRR3_HUMAN	111320	Anaesthetic complication	1463	186	1.84500467892435e-101	3.8142693263615625e-100	8.740344737641081
GBRR3_HUMAN	111320	Anaphylactic shock	9422	375	4.645514748921025e-52	5.361181963915391e-51	2.4873287683066523
GBRR3_HUMAN	111320	Anhedonia	10520	880	0.0	0.0	5.477875453069391
GBRR3_HUMAN	111320	Anion gap increased	525	28	8.850932653125669e-08	2.5081884610809455e-07	3.3807118673232353
GBRR3_HUMAN	111320	Anoxic encephalopathy	735	43	2.0676092397986577e-12	8.015409057828191e-12	3.728798168691415
GBRR3_HUMAN	111320	Anticonvulsant drug level below therapeutic	603	32	1.2598129842919067e-08	3.8190763570347135e-08	3.3629498084756526
GBRR3_HUMAN	111320	Anticonvulsant drug level decreased	1097	51	9.075246688582327e-11	3.1876340728752917e-10	2.925802502767073
GBRR3_HUMAN	111320	Anticonvulsant drug level increased	1126	54	8.31660049701132e-12	3.1102127667614856e-11	3.0227726910721278
GBRR3_HUMAN	111320	Antipsychotic drug level increased	1167	112	2.2215996070336756e-49	2.4578861533470373e-48	6.370478855202456
GBRR3_HUMAN	111320	Antisocial behaviour	539	33	2.193775023320476e-10	7.526166298986714e-10	3.9135414551078758
GBRR3_HUMAN	111320	Anuria	4352	206	1.874193078586636e-39	1.723909115484479e-38	2.981566074015294
GBRR3_HUMAN	111320	Anxiety	113430	5043	0.0	0.0	2.792018475995014
GBRR3_HUMAN	111320	Anxiety disorder	1387	105	3.5223433888774005e-37	3.091138543424891e-36	4.914821952202558
GBRR3_HUMAN	111320	Aortic aneurysm	2655	104	4.025635935878893e-15	1.7963914021076456e-14	2.4464108612617372
GBRR3_HUMAN	111320	Aortic arteriosclerosis	1523	138	2.0964122258446864e-57	2.630168021588042e-56	5.979100158128711
GBRR3_HUMAN	111320	Aortic calcification	600	40	2.0493203116428576e-13	8.390674895840471e-13	4.286259688927673
GBRR3_HUMAN	111320	Aortic disorder	506	31	7.429104441875513e-10	2.4609619640498297e-09	3.9162877999886527
GBRR3_HUMAN	111320	Aortic stenosis	1800	70	1.6385256791101035e-10	5.664543096188297e-10	2.4280546214734797
GBRR3_HUMAN	111320	Aortic valve disease	820	30	7.639638858876746e-05	0.00016015371249927882	2.278770973860282
GBRR3_HUMAN	111320	Aortic valve incompetence	2613	149	1.296727062825528e-37	1.1483805064431354e-36	3.628708486648996
GBRR3_HUMAN	111320	Aortic valve sclerosis	584	52	2.226062134550006e-22	1.3182736430812762e-21	5.865407995374711
GBRR3_HUMAN	111320	Aortic valve stenosis	784	34	5.276545228061343e-07	1.397792866272263e-06	2.72034614923943
GBRR3_HUMAN	111320	Apathy	5898	286	4.265647517987229e-56	5.2499523869131864e-55	3.058122557816536
GBRR3_HUMAN	111320	Apgar score low	846	51	6.3165964301232745e-15	2.7920473170269747e-14	3.849546437602967
GBRR3_HUMAN	111320	Aphasia	13508	522	1.3446664252863644e-67	1.9425001446582645e-66	2.412135053648809
GBRR3_HUMAN	111320	Apnoea	4105	317	9.598453162373694e-111	2.1542659103842934e-109	5.021758315591608
GBRR3_HUMAN	111320	Apraxia	611	49	2.766550129781478e-19	1.4699198203535208e-18	5.231982467267587
GBRR3_HUMAN	111320	Areflexia	1468	114	2.958295164857967e-41	2.82002752981199e-40	5.052341553566149
GBRR3_HUMAN	111320	Arrhythmia	21966	717	4.383054507075636e-63	5.959523570338387e-62	2.0248235096925025
GBRR3_HUMAN	111320	Arrhythmia supraventricular	668	35	3.756709857413956e-09	1.1847771098803822e-08	3.317957737084613
GBRR3_HUMAN	111320	Arterial disorder	1167	49	5.595379712258241e-09	1.7421896499083633e-08	2.6300305425799495
GBRR3_HUMAN	111320	Arteriosclerosis	5826	317	3.524014586762068e-73	5.458127741065093e-72	3.4529715918426236
GBRR3_HUMAN	111320	Arteriosclerosis coronary artery	4446	312	1.8715202385053626e-98	3.7687871414446203e-97	4.528878161885843
GBRR3_HUMAN	111320	Arteriospasm coronary	1497	79	7.997644892126839e-19	4.177763201227555e-18	3.3431616473582553
GBRR3_HUMAN	111320	Aspartate aminotransferase increased	29202	1196	1.7750584065366282e-171	6.07575848728502e-170	2.5626341580877297
GBRR3_HUMAN	111320	Asphyxia	2964	188	1.4340113762274704e-53	1.6988296573845065e-52	4.063917687772923
GBRR3_HUMAN	111320	Aspiration	4683	359	3.2099861631611177e-124	8.044171957724736e-123	4.9821325616444225
GBRR3_HUMAN	111320	Asterixis	586	40	9.653279667809463e-14	4.021520664378195e-13	4.396163783515562
GBRR3_HUMAN	111320	Astigmatism	547	32	1.2394300913587065e-09	4.044338006011936e-09	3.7286297876497043
GBRR3_HUMAN	111320	Ataxia	5246	320	1.1093978435421878e-85	1.970334135449854e-84	3.898181771497356
GBRR3_HUMAN	111320	Atelectasis	5864	413	3.14991749251722e-130	8.257174545491693e-129	4.546533392291287
GBRR3_HUMAN	111320	Atrial flutter	3608	153	5.9031279970838455e-25	3.794067708536751e-24	2.657356947520427
GBRR3_HUMAN	111320	Atrial tachycardia	845	53	3.7747832225086725e-16	1.7665763376094036e-15	4.015662486343856
GBRR3_HUMAN	111320	Atrioventricular block	3451	133	2.5488777228913667e-18	1.3060818784015587e-17	2.405369361296964
GBRR3_HUMAN	111320	Atrioventricular block complete	3117	179	3.1716927937118766e-45	3.265313759637638e-44	3.656013199609513
GBRR3_HUMAN	111320	Atrioventricular block first degree	2330	151	1.725771811714726e-44	1.752753451127575e-43	4.158399716564066
GBRR3_HUMAN	111320	Atrioventricular block second degree	1555	72	1.879595983937742e-14	8.117028627228598e-14	2.913384872851716
GBRR3_HUMAN	111320	Atrophy	1088	58	1.910533739482411e-14	8.247084873304309e-14	3.3790707450575437
GBRR3_HUMAN	111320	Autonomic nervous system imbalance	1051	112	6.361744159940011e-54	7.576585085902582e-53	7.157460268624698
GBRR3_HUMAN	111320	Azotaemia	1961	66	1.0025231604305652e-07	2.8286749190422927e-07	2.089975700564206
GBRR3_HUMAN	111320	Back injury	3965	144	1.2071370370514231e-17	6.018530172207076e-17	2.2614759311379715
GBRR3_HUMAN	111320	Bacterial test positive	863	32	3.564623992153327e-05	7.788514227724987e-05	2.3107633461367
GBRR3_HUMAN	111320	Balance disorder	35264	1170	2.239583381915387e-106	4.830569092536725e-105	2.0592753477044434
GBRR3_HUMAN	111320	Barrett's oesophagus	1750	57	1.9036354044635125e-06	4.7796828698546475e-06	2.0203397706817974
GBRR3_HUMAN	111320	Bedridden	5376	206	2.304729022418631e-27	1.5895449705658202e-26	2.3910199115797695
GBRR3_HUMAN	111320	Benign prostatic hyperplasia	2723	94	6.724301340167401e-11	2.38079984303932e-10	2.1455754091399077
GBRR3_HUMAN	111320	Biliary dilatation	746	31	3.833797713618168e-06	9.330939687520976e-06	2.6017296573351185
GBRR3_HUMAN	111320	Bipolar I disorder	1304	105	1.608598332141917e-39	1.4815201666196673e-38	5.2550473250406
GBRR3_HUMAN	111320	Bipolar disorder	5690	279	1.0687807851453268e-55	1.3067730399056796e-54	3.0940917288766387
GBRR3_HUMAN	111320	Bladder prolapse	688	24	0.0007218714770267962	0.0013119829763542207	2.168950685963401
GBRR3_HUMAN	111320	Bladder spasm	821	30	7.735523421645597e-05	0.0001620324423768333	2.2758901003155785
GBRR3_HUMAN	111320	Blepharospasm	1840	71	1.4099736096591217e-10	4.89431160311796e-10	2.4084466539254423
GBRR3_HUMAN	111320	Blood albumin decreased	4562	196	3.64340619582116e-32	2.851870860449265e-31	2.6938837806728206
GBRR3_HUMAN	111320	Blood albumin increased	508	18	0.0024435921486914013	0.0040537013857164786	2.204362125734232
GBRR3_HUMAN	111320	Blood alcohol increased	644	69	4.7519439712515075e-34	3.886800443049316e-33	7.200916277398492
GBRR3_HUMAN	111320	Blood alkaline phosphatase increased	15112	636	1.2759137548644135e-96	2.5221842898929908e-95	2.6364227873868473
GBRR3_HUMAN	111320	Blood amylase increased	3075	107	2.325834281696352e-12	8.99060419404111e-12	2.163348050543684
GBRR3_HUMAN	111320	Blood bicarbonate decreased	1208	59	4.4889066653305014e-13	1.8047658194752165e-12	3.0813320305084924
GBRR3_HUMAN	111320	Blood calcium decreased	4800	185	5.940345832461099e-25	3.817697960609281e-24	2.405506520979994
GBRR3_HUMAN	111320	Blood chloride decreased	1838	111	1.4652382336975535e-30	1.1023626845056258e-29	3.856889146840535
GBRR3_HUMAN	111320	Blood chloride increased	875	58	1.3162979316733917e-18	6.819773822919195e-18	4.260027989485031
GBRR3_HUMAN	111320	Blood cholesterol decreased	551	22	0.0001576812468536915	0.0003167654805426637	2.4955916525325583
GBRR3_HUMAN	111320	Blood cholesterol increased	22099	728	1.5105230077531476e-65	2.1231882547573303e-64	2.044151361637305
GBRR3_HUMAN	111320	Blood creatine increased	2130	71	4.917441353225278e-08	1.4231609145355488e-07	2.069228815344394
GBRR3_HUMAN	111320	Blood creatine phosphokinase MB increased	1062	64	2.6458782023703644e-18	1.3548207381294162e-17	3.8481850513819595
GBRR3_HUMAN	111320	Blood creatine phosphokinase increased	16978	977	2.7745814043614455e-239	1.3228233489807455e-237	3.663987252368771
GBRR3_HUMAN	111320	Blood creatinine decreased	1069	52	1.1917314713177314e-11	4.4161964369840945e-11	3.06823702412915
GBRR3_HUMAN	111320	Blood culture positive	2591	85	6.206276519283501e-09	1.9260447248334485e-08	2.0353747126192863
GBRR3_HUMAN	111320	Blood electrolytes abnormal	665	33	3.6936623030406713e-08	1.0794451678029826e-07	3.133310089057888
GBRR3_HUMAN	111320	Blood fibrinogen increased	577	23	0.00018846220768536763	0.00037453054778584656	2.4912917325536297
GBRR3_HUMAN	111320	Blood immunoglobulin G increased	601	24	0.00013016176460962686	0.00026467252083792935	2.4959848448521633
GBRR3_HUMAN	111320	Blood lactate dehydrogenase increased	9536	488	2.5017692112223382e-102	5.2100685447192016e-101	3.2364860957950774
GBRR3_HUMAN	111320	Blood lactic acid increased	1817	89	5.896456124126002e-19	3.0951004482827154e-18	3.090671048844839
GBRR3_HUMAN	111320	Blood magnesium decreased	2833	108	5.681962130488443e-15	2.516949142753174e-14	2.3782842751040887
GBRR3_HUMAN	111320	Blood pH decreased	1416	94	3.8171226840444795e-29	2.76567256576667e-28	4.266806165377321
GBRR3_HUMAN	111320	Blood pH increased	511	29	1.3895189083703305e-08	4.1989402252522864e-08	3.6104179122502806
GBRR3_HUMAN	111320	Blood phosphorus decreased	1235	62	3.5680557290986396e-14	1.5204352590547307e-13	3.1717590877998463
GBRR3_HUMAN	111320	Blood phosphorus increased	1033	44	2.139559966520993e-08	6.37075810098803e-08	2.6697026980580856
GBRR3_HUMAN	111320	Blood potassium decreased	12821	458	1.39462118086566e-50	1.5727310865189858e-49	2.2230443359543997
GBRR3_HUMAN	111320	Blood potassium increased	7111	246	5.483094839284443e-26	3.6322935327070316e-25	2.1503100318524266
GBRR3_HUMAN	111320	Blood pressure decreased	27640	1145	9.855753188507978e-168	3.303976519831956e-166	2.5932720442917754
GBRR3_HUMAN	111320	Blood pressure diastolic decreased	2498	123	9.926063262368048e-26	6.52447464695302e-25	3.10776386708777
GBRR3_HUMAN	111320	Blood pressure fluctuation	6201	211	8.208190463438453e-22	4.770048538694061e-21	2.1137915060254335
GBRR3_HUMAN	111320	Blood pressure immeasurable	1071	46	8.144293002253634e-09	2.5057330365715233e-08	2.6930255996774846
GBRR3_HUMAN	111320	Blood pressure systolic decreased	1821	124	5.817220779269418e-39	5.299074575711215e-38	4.384765362391538
GBRR3_HUMAN	111320	Blood pressure systolic increased	5863	221	2.5292062330333086e-28	1.7923351804557423e-27	2.3505295068313043
GBRR3_HUMAN	111320	Blood prolactin increased	2096	78	8.1787946266846e-11	2.880859602761575e-10	2.319422983304767
GBRR3_HUMAN	111320	Blood sodium decreased	8731	387	3.938730672293426e-65	5.5061162426965035e-64	2.7831921134480027
GBRR3_HUMAN	111320	Blood sodium increased	1340	71	3.5430400383826226e-17	1.732905254663278e-16	3.357401206299533
GBRR3_HUMAN	111320	Blood thyroid stimulating hormone decreased	1426	52	1.9009874114106884e-07	5.2362765940617e-07	2.271031334453672
GBRR3_HUMAN	111320	Blood triglycerides increased	10079	370	1.1479082906631415e-43	1.1474277605281186e-42	2.2868292500407197
GBRR3_HUMAN	111320	Blood urea decreased	757	67	3.397411568635301e-28	2.398873411893809e-27	5.82682838871617
GBRR3_HUMAN	111320	Blood urea increased	10874	480	9.033986068257852e-80	1.51074930932421e-78	2.771181942427743
GBRR3_HUMAN	111320	Blood urine	612	28	1.8339637611102704e-06	4.6120264407255085e-06	2.877078421335013
GBRR3_HUMAN	111320	Bloody discharge	514	24	6.835669309718957e-06	1.619957802046787e-05	2.939149500978976
GBRR3_HUMAN	111320	Body temperature decreased	3428	139	4.224506185534526e-21	2.396569561313506e-20	2.5360478427039377
GBRR3_HUMAN	111320	Bone debridement	597	46	1.5493496286372687e-17	7.68948317348425e-17	5.009711868728532
GBRR3_HUMAN	111320	Bone disorder	10572	369	5.917806806430268e-39	5.389732677097431e-38	2.170226164167437
GBRR3_HUMAN	111320	Bone erosion	684	24	0.0006860936784091183	0.0012516972418266663	2.182095841635906
GBRR3_HUMAN	111320	Bone lesion	1602	94	2.9305071465799693e-25	1.9002464543635956e-24	3.7405290123533272
GBRR3_HUMAN	111320	Bone neoplasm malignant	1178	45	3.9086889981183347e-07	1.04790050619611e-06	2.3833571085829073
GBRR3_HUMAN	111320	Bradyarrhythmia	761	26	0.000525626215833764	0.0009770847002123532	2.122719084040371
GBRR3_HUMAN	111320	Bradycardia	21589	1289	0.0	0.0	3.810337061398462
GBRR3_HUMAN	111320	Bradycardia neonatal	579	58	2.25708119388469e-27	1.5570217897033305e-26	6.680312605392073
GBRR3_HUMAN	111320	Bradykinesia	1233	198	3.068104039218391e-127	7.866947905276693e-126	11.479721601649768
GBRR3_HUMAN	111320	Bradyphrenia	2507	279	2.7581137219819406e-136	7.554579040767983e-135	7.51442116021162
GBRR3_HUMAN	111320	Brain death	1498	88	8.608230716607935e-24	5.336461110788955e-23	3.745157401956662
GBRR3_HUMAN	111320	Brain herniation	1295	63	8.932250564461621e-14	3.7275149464787503e-13	3.068572277300493
GBRR3_HUMAN	111320	Brain injury	3502	164	2.8864482945099975e-31	2.210113400107245e-30	2.948248126356482
GBRR3_HUMAN	111320	Brain natriuretic peptide increased	1208	50	8.359959780809078e-09	2.5698949974916282e-08	2.5910032661911666
GBRR3_HUMAN	111320	Brain oedema	5564	329	1.1420042904692624e-84	2.007876892251937e-83	3.7712535104490663
GBRR3_HUMAN	111320	Brain stem infarction	648	29	1.8726304195486298e-06	4.7050629677772816e-06	2.811343188537375
GBRR3_HUMAN	111320	Breast calcifications	642	26	3.371608014439533e-05	7.387547548862895e-05	2.532789816184534
GBRR3_HUMAN	111320	Breath sounds abnormal	1751	86	1.9143068043401997e-18	9.85591507069773e-18	3.0994934927741253
GBRR3_HUMAN	111320	Bronchial hyperreactivity	570	24	3.6121443973516014e-05	7.887515754325271e-05	2.6376982701093374
GBRR3_HUMAN	111320	Bronchial obstruction	582	44	1.5236942580025058e-16	7.254138073032938e-16	4.907687673567744
GBRR3_HUMAN	111320	Bronchiectasis	1650	57	3.0369136229549857e-07	8.216764655486776e-07	2.147165870536273
GBRR3_HUMAN	111320	Bronchitis chronic	1150	67	2.4414505125666362e-18	1.2519838733007723e-17	3.712383737963211
GBRR3_HUMAN	111320	Bronchopneumonia	3737	195	3.4482420326066543e-43	3.414344152457561e-42	3.3036388906754794
GBRR3_HUMAN	111320	Bronchospasm	6567	262	4.04662835319456e-37	3.5466352249457434e-36	2.493576612051817
GBRR3_HUMAN	111320	Bruxism	2289	98	1.0826313649977277e-16	5.18661007639133e-16	2.6840476007342615
GBRR3_HUMAN	111320	Bundle branch block	573	44	8.633996306430946e-17	4.1540341192135927e-16	4.991183305065117
GBRR3_HUMAN	111320	Bundle branch block left	2317	118	5.777289479309206e-26	3.8247593153631545e-25	3.2200550277892295
GBRR3_HUMAN	111320	Bundle branch block right	2699	166	8.26521899150558e-46	8.601168386246007e-45	3.93259672999128
GBRR3_HUMAN	111320	Bursitis	4257	173	7.150825099102745e-26	4.721259616564169e-25	2.5419493062151877
GBRR3_HUMAN	111320	C-reactive protein increased	12040	633	1.8417703857181625e-137	5.088537983315753e-136	3.329958215418343
GBRR3_HUMAN	111320	CSF protein increased	570	24	3.6121443973516014e-05	7.887515754325271e-05	2.6376982701093374
GBRR3_HUMAN	111320	Cachexia	2150	99	4.40747604712223e-19	2.3251763159804996e-18	2.8965167863743315
GBRR3_HUMAN	111320	Calcium deficiency	795	35	2.5661402952346384e-07	6.988424482788387e-07	2.763509536282316
GBRR3_HUMAN	111320	Calculus ureteric	811	28	0.0004126009722083796	0.0007791146231340997	2.145866919616408
GBRR3_HUMAN	111320	Cancer pain	524	29	2.3934806946099016e-08	7.098373348418431e-08	3.5155988559689595
GBRR3_HUMAN	111320	Candidiasis	4547	170	7.806139932088975e-22	4.5393182358277995e-21	2.3306598262846383
GBRR3_HUMAN	111320	Capillary leak syndrome	659	24	0.0003348070843897625	0.0006415882376453896	2.268005126739682
GBRR3_HUMAN	111320	Carbon dioxide decreased	511	17	0.007409635919125749	0.011144718778107344	2.065040093046126
GBRR3_HUMAN	111320	Carcinoembryonic antigen increased	566	19	0.003985314885346557	0.006347908853007584	2.0843602874858522
GBRR3_HUMAN	111320	Cardiac arrest	40759	2580	0.0	0.0	4.055100970797232
GBRR3_HUMAN	111320	Cardiac death	780	30	2.579119083701962e-05	5.730690530936134e-05	2.4003054257994965
GBRR3_HUMAN	111320	Cardiac enzymes increased	808	35	3.730787536253242e-07	1.0019176775514552e-06	2.7170339554651486
GBRR3_HUMAN	111320	Cardiac failure acute	2003	95	3.321666126871059e-19	1.7602596682818555e-18	2.9878015651330214
GBRR3_HUMAN	111320	Cardiac failure chronic	962	34	5.638124246791801e-05	0.00012015638235938513	2.198555616303419
GBRR3_HUMAN	111320	Cardiac fibrillation	725	24	0.0017108512396099818	0.0029167223050979275	2.054469693979598
GBRR3_HUMAN	111320	Cardiac hypertrophy	579	39	2.9407950691151847e-13	1.1936329412496815e-12	4.333884796582425
GBRR3_HUMAN	111320	Cardiac murmur	5430	221	1.1664459906615995e-32	9.238913664502155e-32	2.5459181181689807
GBRR3_HUMAN	111320	Cardiac stress test abnormal	556	30	2.437986672561737e-08	7.225862580004556e-08	3.4224887249992824
GBRR3_HUMAN	111320	Cardiac tamponade	1843	60	1.2755013018874524e-06	3.2597623865357782e-06	2.019325933089874
GBRR3_HUMAN	111320	Cardio-respiratory arrest	21867	1479	0.0	0.0	4.353114239696704
GBRR3_HUMAN	111320	Cardioactive drug level increased	1036	61	4.672340401692276e-17	2.2736634189718026e-16	3.7543238711222893
GBRR3_HUMAN	111320	Cardiogenic shock	4750	252	1.4533417997400227e-56	1.8005507337366586e-55	3.3619217835786634
GBRR3_HUMAN	111320	Cardiomegaly	8134	525	2.7399976987846707e-149	8.196105673083404e-148	4.14036124505433
GBRR3_HUMAN	111320	Cardiomyopathy	7484	311	5.752252570889111e-47	6.1058383912048096e-46	2.601753058077665
GBRR3_HUMAN	111320	Cardiopulmonary failure	2204	79	4.1017297659927287e-10	1.3824514778504145e-09	2.230872101625415
GBRR3_HUMAN	111320	Cardiovascular insufficiency	757	30	1.7049677375048395e-05	3.868274999814641e-05	2.476243561691365
GBRR3_HUMAN	111320	Carotid artery disease	857	39	2.3499319048975574e-08	6.974076031316573e-08	2.8609997434651704
GBRR3_HUMAN	111320	Carotid artery stenosis	2363	110	2.3202427895154436e-21	1.327907357443444e-20	2.9298002312244193
GBRR3_HUMAN	111320	Catatonia	1823	169	2.444093786368642e-71	3.7017449784321634e-70	6.131372686821569
GBRR3_HUMAN	111320	Catheter related complication	1331	59	2.1607964224112293e-11	7.888766827950372e-11	2.783373036992341
GBRR3_HUMAN	111320	Catheter related infection	1243	47	2.6294526831109434e-07	7.154501914900768e-07	2.358159594744489
GBRR3_HUMAN	111320	Catheter site haemorrhage	942	39	2.63472264043668e-07	7.168340751608104e-07	2.5916919049330116
GBRR3_HUMAN	111320	Cell death	666	51	3.7677937159398764e-19	1.9926149155649456e-18	4.976242955925786
GBRR3_HUMAN	111320	Central venous catheterisation	1106	43	5.849899097550061e-07	1.5434669251186641e-06	2.4274020063353334
GBRR3_HUMAN	111320	Cerebellar infarction	914	47	1.757844081405519e-11	6.450071657519355e-11	3.2530090834076226
GBRR3_HUMAN	111320	Cerebellar syndrome	1172	75	1.1461060785938147e-22	6.85079057520207e-22	4.1026186630574815
GBRR3_HUMAN	111320	Cerebral artery embolism	686	24	0.0007035213410275215	0.0012812046945288977	2.1755034070690304
GBRR3_HUMAN	111320	Cerebral artery occlusion	647	21	0.004453306845820276	0.007023024550760887	2.0130357005506965
GBRR3_HUMAN	111320	Cerebral atrophy	2480	194	2.0323167552086985e-69	3.0079743518160767e-68	5.092511511429379
GBRR3_HUMAN	111320	Cerebral disorder	1738	67	5.215311879944226e-10	1.7456330149339217e-09	2.406051219757126
GBRR3_HUMAN	111320	Cerebral haematoma	1358	73	6.046589432512965e-18	3.051106043629747e-17	3.4089940872249667
GBRR3_HUMAN	111320	Cerebral infarction	11214	367	2.5345101517520693e-33	2.0386636191397122e-32	2.0303127391638593
GBRR3_HUMAN	111320	Cerebral ischaemia	3168	138	1.0053576398446278e-23	6.21843570059695e-23	2.733021029375665
GBRR3_HUMAN	111320	Cerebral ventricle dilatation	676	41	2.1394905401072835e-12	8.285956425360865e-12	3.87450875818029
GBRR3_HUMAN	111320	Cerumen impaction	675	27	4.409768678953463e-05	9.527122168771165e-05	2.500318151874476
GBRR3_HUMAN	111320	Cervical spinal stenosis	805	51	8.956629940128269e-16	4.1187124984013495e-15	4.058871907021696
GBRR3_HUMAN	111320	Cervical vertebral fracture	1302	49	1.6376478111870165e-07	4.536620224670172e-07	2.346667315725765
GBRR3_HUMAN	111320	Cervicobrachial syndrome	601	34	9.109266328575051e-10	2.9994826808924965e-09	3.5983414672479235
GBRR3_HUMAN	111320	Chest X-ray abnormal	2115	112	4.360402485396237e-26	2.8969487368167056e-25	3.3553945043627516
GBRR3_HUMAN	111320	Chest injury	530	27	3.6421397452258176e-07	9.788681626926444e-07	3.2210858099695043
GBRR3_HUMAN	111320	Cholestasis	6764	377	1.5118702890400706e-89	2.78593018754625e-88	3.542019514351066
GBRR3_HUMAN	111320	Chorea	799	53	3.697942652257939e-17	1.8071163705542423e-16	4.263277063249777
GBRR3_HUMAN	111320	Chronic fatigue syndrome	573	37	4.022443009908161e-12	1.5323199810091636e-11	4.142318132209953
GBRR3_HUMAN	111320	Chronic obstructive pulmonary disease	21985	786	8.460853862622176e-86	1.504130216190829e-84	2.224916345910662
GBRR3_HUMAN	111320	Chronic sinusitis	1138	55	4.010760886624804e-12	1.5280133105658207e-11	3.0474791878802474
GBRR3_HUMAN	111320	Circulatory collapse	8680	498	2.6188752253694513e-122	6.463633577786396e-121	3.652383592178408
GBRR3_HUMAN	111320	Claustrophobia	509	36	5.670728409669924e-13	2.2676146096692305e-12	4.567177342958874
GBRR3_HUMAN	111320	Clonus	1154	88	1.119741002818642e-31	8.658258724947883e-31	4.953726019473634
GBRR3_HUMAN	111320	Clumsiness	1133	59	3.111325508297048e-14	1.3297969069200787e-13	3.2965088482814315
GBRR3_HUMAN	111320	Coagulation time prolonged	843	41	1.6240272899299977e-09	5.259652998176791e-09	3.0677220217512278
GBRR3_HUMAN	111320	Coagulopathy	8213	299	6.67072300638406e-35	5.563346956680321e-34	2.267157323458585
GBRR3_HUMAN	111320	Cogwheel rigidity	509	75	1.3565783507246058e-46	1.430693108602352e-45	10.369983118373403
GBRR3_HUMAN	111320	Colitis ischaemic	3018	99	3.9782821171627885e-10	1.3419420937448406e-09	2.0352024422246506
GBRR3_HUMAN	111320	Colitis microscopic	867	28	0.00107995609390862	0.0019070456508103854	2.0026386150889723
GBRR3_HUMAN	111320	Collapse of lung	965	41	6.725848611694152e-08	1.924702883276821e-07	2.6626764734247668
GBRR3_HUMAN	111320	Colon adenoma	689	38	2.0123707612927314e-10	6.920263134748106e-10	3.5027498533172383
GBRR3_HUMAN	111320	Colonic polyp	3881	155	1.0118311585778419e-22	6.059101523287091e-22	2.496291874657287
GBRR3_HUMAN	111320	Coma	19846	1898	0.0	0.0	6.345804126041126
GBRR3_HUMAN	111320	Communication disorder	1690	90	1.8333882701161658e-21	1.0529831821101809e-20	3.3754295050305423
GBRR3_HUMAN	111320	Compartment syndrome	1046	53	1.6762697852428656e-12	6.531113681244029e-12	3.202824460407184
GBRR3_HUMAN	111320	Completed suicide	40294	3527	0.0	0.0	5.756437319331755
GBRR3_HUMAN	111320	Complex partial seizures	1148	69	1.5275697499856423e-19	8.196728281323708e-19	3.8373742905506325
GBRR3_HUMAN	111320	Complex regional pain syndrome	767	41	1.0281341178679717e-10	3.600266284803493e-10	3.388860966176976
GBRR3_HUMAN	111320	Compression fracture	2054	104	6.599023648794836e-23	3.9755456810424346e-22	3.200407234399329
GBRR3_HUMAN	111320	Compulsive shopping	527	34	2.958569706859116e-11	1.0710564705721281e-10	4.138457630688788
GBRR3_HUMAN	111320	Computerised tomogram abnormal	1590	77	2.3019898296025297e-16	1.0874737763613882e-15	3.0539246164335965
GBRR3_HUMAN	111320	Concussion	2637	94	1.1098465536531216e-11	4.120346806594851e-11	2.218135175237443
GBRR3_HUMAN	111320	Conduction disorder	974	58	1.6287991408675825e-16	7.746018245977563e-16	3.7996101172590286
GBRR3_HUMAN	111320	Confusional state	65926	3318	0.0	0.0	3.1801899928135104
GBRR3_HUMAN	111320	Congestive cardiomyopathy	2373	97	2.1206950360529227e-15	9.588404567423651e-15	2.5574431711615904
GBRR3_HUMAN	111320	Connective tissue disorder	572	22	0.0003422237533803171	0.0006548228673750691	2.400305425799497
GBRR3_HUMAN	111320	Continuous haemodiafiltration	988	50	7.248959657569109e-12	2.7199508106050397e-11	3.198701260393786
GBRR3_HUMAN	111320	Conversion disorder	1345	86	1.0264912400332951e-25	6.745234577334059e-25	4.099012442787068
GBRR3_HUMAN	111320	Convulsion	76740	2930	0.0	0.0	2.382094193738154
GBRR3_HUMAN	111320	Coordination abnormal	8544	380	2.3622429751786988e-64	3.2645533073673734e-63	2.7931040599087726
GBRR3_HUMAN	111320	Cor pulmonale	638	24	0.00022465676499674073	0.00044142572509513363	2.3455753346574886
GBRR3_HUMAN	111320	Corneal oedema	842	28	0.000557052215707924	0.0010307394328896414	2.0641447150609924
GBRR3_HUMAN	111320	Coronary artery restenosis	569	21	0.0006911346372273643	0.001260242965162752	2.2995626798261606
GBRR3_HUMAN	111320	Coronary artery stenosis	3661	163	1.0438595977485198e-28	7.4785540703553285e-28	2.796239168134062
GBRR3_HUMAN	111320	Coronary artery thrombosis	1436	48	5.963596844167942e-06	1.4222191572214334e-05	2.0751920107776627
GBRR3_HUMAN	111320	Costochondritis	779	41	1.631608830992944e-10	5.641111813729089e-10	3.333757535832635
GBRR3_HUMAN	111320	Creatinine renal clearance decreased	2045	76	1.521244509695998e-10	5.269873518489e-10	2.316191116820236
GBRR3_HUMAN	111320	Crepitations	1455	51	8.065603063632724e-07	2.100942349170583e-06	2.1797645426597994
GBRR3_HUMAN	111320	Culture urine positive	1135	44	4.3033789074101544e-07	1.1494682331576305e-06	2.4201062954898687
GBRR3_HUMAN	111320	Cyanosis	8112	367	5.2785430954518e-64	7.26311376944222e-63	2.8434864146817795
GBRR3_HUMAN	111320	Cystitis interstitial	696	24	0.0008048948375115005	0.0014505387050694745	2.1431298444638363
GBRR3_HUMAN	111320	Cytolytic hepatitis	3634	277	1.0163633792369741e-95	1.9889845099956384e-94	4.951479021049007
GBRR3_HUMAN	111320	Cytomegalovirus test positive	748	32	1.4833354685090335e-06	3.7667979829087433e-06	2.681905503686589
GBRR3_HUMAN	111320	Deafness neurosensory	1272	68	1.033965875907119e-16	4.958152394011265e-16	3.389135567989323
GBRR3_HUMAN	111320	Debridement	1089	58	1.9857224221891472e-14	8.564244389396416e-14	3.375793275857682
GBRR3_HUMAN	111320	Decreased activity	3284	120	3.821618248556548e-15	1.7071921105896336e-14	2.2758901003155785
GBRR3_HUMAN	111320	Decreased interest	2512	124	5.1071319696299013e-26	3.385757983177639e-25	3.1159743802254773
GBRR3_HUMAN	111320	Decubitus ulcer	3688	172	1.7021893361333694e-32	1.343067614885429e-31	2.9355271134635488
GBRR3_HUMAN	111320	Delirium	12760	961	2e-323	1.31e-321	4.887476723013214
GBRR3_HUMAN	111320	Delusion	5926	428	1.1567752157367638e-138	3.222078903376788e-137	4.671383786113972
GBRR3_HUMAN	111320	Dental caries	5283	235	1.6032105187548012e-40	1.506616400677772e-39	2.7935408828391535
GBRR3_HUMAN	111320	Dental operation	786	33	1.5384780498395956e-06	3.900223141241633e-06	2.629816701573154
GBRR3_HUMAN	111320	Dependence	3937	220	3.1644034555213435e-53	3.7269522607352965e-52	3.551702943744211
GBRR3_HUMAN	111320	Depersonalisation	868	91	1.4368506122045416e-43	1.433394126081941e-42	7.027921291755284
GBRR3_HUMAN	111320	Depressed level of consciousness	17751	1380	0.0	0.0	5.0583676739406656
GBRR3_HUMAN	111320	Depressed mood	18183	621	2.2095538769821648e-61	2.9355278876126497e-60	2.1218962382153053
GBRR3_HUMAN	111320	Depression	107205	4115	0.0	0.0	2.3952994536727443
GBRR3_HUMAN	111320	Depression suicidal	1318	48	6.05519123482029e-07	1.5952724059053649e-06	2.268005126739682
GBRR3_HUMAN	111320	Depressive symptom	1192	85	1.241126072606864e-28	8.871960248653609e-28	4.607632366597951
GBRR3_HUMAN	111320	Derealisation	767	62	3.883811313588319e-24	2.434214601754853e-23	5.277267248211659
GBRR3_HUMAN	111320	Dermal cyst	963	37	3.045880919413543e-06	7.48791828855625e-06	2.3977133033094327
GBRR3_HUMAN	111320	Dermatitis bullous	3031	101	1.0120893911077367e-10	3.5454411057519886e-10	2.0685225939057097
GBRR3_HUMAN	111320	Dermatitis exfoliative	3811	127	4.087526359725017e-13	1.6467084469257042e-12	2.068667135427091
GBRR3_HUMAN	111320	Developmental delay	1890	132	1.616388190546177e-42	1.5795469215503705e-41	4.505692778804517
GBRR3_HUMAN	111320	Diabetes insipidus	884	55	1.5090991919713485e-16	7.185968755756051e-16	3.981206224938852
GBRR3_HUMAN	111320	Diabetes mellitus	37330	1402	4.776718658142221e-169	1.6126742023292835e-167	2.3416473272732232
GBRR3_HUMAN	111320	Diabetes mellitus inadequate control	7146	340	2.039163396798499e-64	2.820219408968673e-63	2.9977367204372207
GBRR3_HUMAN	111320	Diabetic coma	2029	87	3.323831395914757e-15	1.489072961417366e-14	2.6882926370308473
GBRR3_HUMAN	111320	Diabetic nephropathy	878	45	5.157048169452073e-11	1.8389182116590558e-10	3.2417090084326934
GBRR3_HUMAN	111320	Diabetic neuropathy	2905	211	9.494891023198144e-70	1.410501401821714e-68	4.699929889046899
GBRR3_HUMAN	111320	Diabetic retinopathy	1552	59	9.046946248760189e-09	2.773617965535106e-08	2.3713667133652097
GBRR3_HUMAN	111320	Diastolic dysfunction	1518	77	1.9063854069568254e-17	9.426024576832653e-17	3.206514881793221
GBRR3_HUMAN	111320	Diffuse alveolar damage	537	33	1.9955530554180822e-10	6.863944271066599e-10	3.9290713815170344
GBRR3_HUMAN	111320	Dilatation atrial	1193	80	2.4294182782656846e-25	1.5791202523589117e-24	4.313217297034137
GBRR3_HUMAN	111320	Dilatation ventricular	2111	117	7.435003294018619e-29	5.345342926734411e-28	3.521009714374889
GBRR3_HUMAN	111320	Diplegia	998	35	4.5473999145641836e-05	9.81025180171785e-05	2.1809628739092006
GBRR3_HUMAN	111320	Diplopia	10786	355	9.198388492391402e-33	7.303677773143109e-32	2.0422500866619244
GBRR3_HUMAN	111320	Disability	4156	173	4.199764702600306e-27	2.8739654228577717e-26	2.606407473407689
GBRR3_HUMAN	111320	Disinhibition	753	82	1.1671583027461886e-40	1.09959891837954e-39	7.333272910415751
GBRR3_HUMAN	111320	Disorientation	19915	1094	1.6066317637972367e-251	8.094203596450627e-250	3.488037479178377
GBRR3_HUMAN	111320	Disseminated intravascular coagulation	7696	360	2.676161227283234e-66	3.802200750909805e-65	2.9447585649121417
GBRR3_HUMAN	111320	Dissociation	1679	99	1.1436158955687485e-26	7.724010898955648e-26	3.759972106869465
GBRR3_HUMAN	111320	Disturbance in attention	22736	954	2.407478727722202e-143	6.918893851401193e-142	2.6281922874537695
GBRR3_HUMAN	111320	Diverticular perforation	1033	35	0.00010741927633145857	0.00022083470850637436	2.104476199974509
GBRR3_HUMAN	111320	Diverticulum	4210	199	4.2934301389019394e-38	3.839658848502758e-37	2.9771925937054347
GBRR3_HUMAN	111320	Diverticulum intestinal	1701	95	5.4279236676557604e-24	3.3863408325983553e-23	3.549642208140601
GBRR3_HUMAN	111320	Diverticulum intestinal haemorrhagic	683	28	1.3912407425789009e-05	3.188077359795391e-05	2.5652119054345768
GBRR3_HUMAN	111320	Dizziness postural	2808	92	1.6059404576291154e-09	5.202455610778581e-09	2.0326592339244636
GBRR3_HUMAN	111320	Drooling	2480	146	2.0956027709356252e-38	1.8864173683746975e-37	3.75369100435654
GBRR3_HUMAN	111320	Drug abuse	24192	3443	0.0	0.0	9.95740949085217
GBRR3_HUMAN	111320	Drug abuser	6070	359	3.0540466686348603e-92	5.776598866143514e-91	3.7721486948958995
GBRR3_HUMAN	111320	Drug dependence	15364	912	1.1369717364258498e-232	5.268064946973618e-231	3.786809002783596
GBRR3_HUMAN	111320	Drug diversion	1296	57	6.227107537201123e-11	2.2094246967465635e-10	2.7606418335466367
GBRR3_HUMAN	111320	Drug effect increased	2474	80	3.0081189946816195e-08	8.851812057957092e-08	2.005267690726397
GBRR3_HUMAN	111320	Drug eruption	6922	255	7.168078321409871e-31	5.4354153759855404e-30	2.2951773045555415
GBRR3_HUMAN	111320	Drug interaction	62757	3797	0.0	0.0	3.8644673090912014
GBRR3_HUMAN	111320	Drug level above therapeutic	1228	106	1.3593793590327261e-42	1.3302167497343936e-41	5.669170568956032
GBRR3_HUMAN	111320	Drug level below therapeutic	1172	49	1.0260788219883854e-08	3.132089976953314e-08	2.61832070044914
GBRR3_HUMAN	111320	Drug level decreased	2547	116	1.078971480299487e-21	6.2425588483867754e-21	2.8633836835946282
GBRR3_HUMAN	111320	Drug level increased	6259	444	5.618582624955083e-141	1.5901651629125e-139	4.581838388026555
GBRR3_HUMAN	111320	Drug rash with eosinophilia and systemic symptoms	3547	207	4.340693614731256e-53	5.100209116470352e-52	3.7190361013510174
GBRR3_HUMAN	111320	Drug screen negative	644	29	1.6597084321145278e-06	4.1940475932259614e-06	2.8296283474872115
GBRR3_HUMAN	111320	Drug screen positive	4714	273	9.87016896107583e-69	1.4472061961969732e-67	3.6888278610856937
GBRR3_HUMAN	111320	Drug tolerance	1692	112	2.8231915751773463e-34	2.320206262330307e-33	4.253705817872526
GBRR3_HUMAN	111320	Drug toxicity	15104	1351	0.0	0.0	5.89473683969883
GBRR3_HUMAN	111320	Drug withdrawal convulsions	584	49	4.2488800800912456e-20	2.3275564521556865e-19	5.496026442251185
GBRR3_HUMAN	111320	Drug withdrawal syndrome	33832	1578	1.0019052313569416e-283	5.753239346173171e-282	2.9358234342342087
GBRR3_HUMAN	111320	Drug withdrawal syndrome neonatal	2875	210	7.614629720196089e-70	1.1324095628229953e-68	4.728556654952104
GBRR3_HUMAN	111320	Duodenal ulcer	3359	129	1.0514041122586545e-17	5.2547680869895375e-17	2.3965897827255036
GBRR3_HUMAN	111320	Duodenal ulcer perforation	736	42	8.106208963188316e-12	3.0335904469846494e-11	3.63158601886091
GBRR3_HUMAN	111320	Duodenitis	1534	55	1.638280261472237e-07	4.5382482274891487e-07	2.2315212714498367
GBRR3_HUMAN	111320	Dysaesthesia	1230	60	3.023369461973072e-13	1.2263092811562944e-12	3.0773146484608933
GBRR3_HUMAN	111320	Dysarthria	17218	933	1.1724247795973077e-210	4.902814500095813e-209	3.4379566507076
GBRR3_HUMAN	111320	Dyskinesia	17986	911	1.1702070375155623e-186	4.325270956205577e-185	3.2015786865349067
GBRR3_HUMAN	111320	Dyslipidaemia	2294	141	3.7131409115527146e-39	3.3954660615496534e-38	3.9299008945393528
GBRR3_HUMAN	111320	Dysphagia	36293	1187	4.541345464441026e-104	9.599183323806727e-103	2.0289712160485407
GBRR3_HUMAN	111320	Dysphemia	1975	68	3.729615006954017e-08	1.0896065535538404e-07	2.1397583764337416
GBRR3_HUMAN	111320	Dysphoria	1010	64	2.2303808596177574e-19	1.189131521885057e-18	4.059713193741221
GBRR3_HUMAN	111320	Dysuria	15924	517	2.165642245431663e-45	2.2362210160203315e-44	2.013626768901051
GBRR3_HUMAN	111320	Eating disorder	7614	297	4.948721403780796e-40	4.605940036994999e-39	2.4357342881729216
GBRR3_HUMAN	111320	Ecchymosis	3426	143	9.42490451337345e-23	5.649812318511082e-22	2.6137958870646365
GBRR3_HUMAN	111320	Echocardiogram abnormal	780	56	1.405425344227893e-19	7.552911996257362e-19	4.64147458027527
GBRR3_HUMAN	111320	Economic problem	9202	341	2.939262192934903e-41	2.801989531605931e-40	2.3092883145176293
GBRR3_HUMAN	111320	Effusion	698	24	0.0008281615162296879	0.0014892335207839704	2.1367704087235877
GBRR3_HUMAN	111320	Ejection fraction decreased	5737	246	8.5977947791547e-40	7.961903496343979e-39	2.68837704765378
GBRR3_HUMAN	111320	Electrocardiogram QRS complex prolonged	1623	104	8.325162540882064e-31	6.302815256061358e-30	4.108488549755558
GBRR3_HUMAN	111320	Electrocardiogram QT prolonged	12063	863	5.949131399199438e-275	3.2889267134384417e-273	4.6238026394307274
GBRR3_HUMAN	111320	Electrocardiogram ST segment abnormal	624	41	1.6626418605639273e-13	6.838903454491773e-13	4.220091014484536
GBRR3_HUMAN	111320	Electrocardiogram ST segment depression	1344	71	4.126958960513311e-17	2.0124614035932656e-16	3.346851634559393
GBRR3_HUMAN	111320	Electrocardiogram ST segment elevation	1869	128	2.0550850219504336e-40	1.9269959206632857e-39	4.4118192777474965
GBRR3_HUMAN	111320	Electrocardiogram ST-T change	662	54	2.0298570153576204e-21	1.1642197016667556e-20	5.329625534258751
GBRR3_HUMAN	111320	Electrocardiogram T wave abnormal	978	45	1.503277344150487e-09	4.8794360079076815e-09	2.8942589539382997
GBRR3_HUMAN	111320	Electrocardiogram T wave inversion	1470	100	9.837474049413123e-32	7.617744933163313e-31	4.380119390145067
GBRR3_HUMAN	111320	Electrocardiogram abnormal	4115	215	1.6341384115102517e-47	1.751866909294058e-46	3.30811324709546
GBRR3_HUMAN	111320	Electroencephalogram abnormal	2249	180	4.890806942957112e-66	6.922307197981295e-65	5.220577291492381
GBRR3_HUMAN	111320	Electrolyte imbalance	4148	134	7.156561800329676e-13	2.845261054759668e-12	2.0032444385720765
GBRR3_HUMAN	111320	Electromechanical dissociation	2086	151	2.8743710682673475e-50	3.2261385559648213e-49	4.6827663991695605
GBRR3_HUMAN	111320	Emotional disorder	13598	495	7.862699532599898e-57	9.778413415646167e-56	2.266944947284498
GBRR3_HUMAN	111320	Emotional distress	27112	1376	3.253943471377885e-282	1.8543315551504797e-280	3.2083659716934525
GBRR3_HUMAN	111320	Emphysema	4991	234	6.586758103964117e-44	6.615114016330554e-43	2.9518155856478994
GBRR3_HUMAN	111320	Empyema	760	34	2.6185763212278047e-07	7.125883747466734e-07	2.810274947561395
GBRR3_HUMAN	111320	Encephalopathy	9290	514	3.342125728726807e-120	8.109298147477777e-119	3.5145766546859085
GBRR3_HUMAN	111320	Endocarditis	2032	97	9.27611599646124e-20	5.019976312297923e-19	3.0081347067513073
GBRR3_HUMAN	111320	Endodontic procedure	1252	47	3.125330008762448e-07	8.446518502632466e-07	2.3405467844932857
GBRR3_HUMAN	111320	Endotracheal intubation	1336	79	1.052869640135004e-21	6.0944294763767675e-21	3.771362940297539
GBRR3_HUMAN	111320	Enterobacter infection	679	31	5.592670073327434e-07	1.478021811206778e-06	2.8707356558558796
GBRR3_HUMAN	111320	Enterococcal infection	1957	86	1.2086145847327358e-15	5.524442998652526e-15	2.75823445508761
GBRR3_HUMAN	111320	Enuresis	1631	56	4.5489171243986313e-07	1.2122172312173298e-06	2.133604822932886
GBRR3_HUMAN	111320	Eosinophil count increased	2787	132	5.932223791378696e-26	3.9255877539959502e-25	2.983430472745138
GBRR3_HUMAN	111320	Eosinophilia	5952	256	1.5018813794926509e-41	1.4399309806755805e-40	2.696972388538761
GBRR3_HUMAN	111320	Epicondylitis	680	26	9.879738090724927e-05	0.00020417251049494097	2.385624658669225
GBRR3_HUMAN	111320	Epilepsy	10719	533	6.195048296603018e-107	1.3425546306748622e-105	3.1400029254641955
GBRR3_HUMAN	111320	Erosive oesophagitis	1070	36	8.599294766223947e-05	0.00017913423682833194	2.089240699438634
GBRR3_HUMAN	111320	Escherichia bacteraemia	623	28	2.5698782091944497e-06	6.3685979253093266e-06	2.823888736234702
GBRR3_HUMAN	111320	Escherichia urinary tract infection	1782	67	1.0840811228474618e-09	3.551887186644001e-09	2.34432162578085
GBRR3_HUMAN	111320	Essential hypertension	1165	71	2.1876916230359537e-20	1.210727627418366e-19	3.8944626424077766
GBRR3_HUMAN	111320	Euphoric mood	4863	191	1.399826940451891e-26	9.430716460982205e-26	2.453223118191909
GBRR3_HUMAN	111320	Excessive eye blinking	754	30	1.627861819094016e-05	3.701337268300823e-05	2.4865042394331804
GBRR3_HUMAN	111320	Excoriation	3344	168	1.6507072219448843e-35	1.3959748592526936e-34	3.1742074270648257
GBRR3_HUMAN	111320	Exostosis	4237	188	1.1912587761223464e-32	9.432939155319045e-32	2.786227587369137
GBRR3_HUMAN	111320	Extensor plantar response	615	51	1.2473874395358187e-20	6.964363155588577e-20	5.426222372153117
GBRR3_HUMAN	111320	Extrasystoles	3564	117	8.737814363932003e-12	3.263922824730437e-11	2.0368126981327324
GBRR3_HUMAN	111320	Eye movement disorder	3060	140	5.295223630850947e-26	3.509144736668688e-25	2.8770784213350136
GBRR3_HUMAN	111320	Eye rolling	785	32	6.32622574252607e-06	1.5044813149618664e-05	2.550125286373968
GBRR3_HUMAN	111320	Face injury	1595	93	8.108108892207567e-25	5.190950420877963e-24	3.715519384143695
GBRR3_HUMAN	111320	Facial bones fracture	1780	66	3.090120834470853e-09	9.809318175228463e-09	2.310679085512935
GBRR3_HUMAN	111320	Faecal incontinence	5128	213	8.272573503238948e-33	6.574950635678564e-32	2.6005343626413673
GBRR3_HUMAN	111320	Faecaloma	1970	115	2.5727280924451768e-30	1.923584031786478e-29	3.720149918691943
GBRR3_HUMAN	111320	Fall	124030	4360	0.0	0.0	2.1862897251787845
GBRR3_HUMAN	111320	Fear	16870	1216	0.0	0.0	4.661382710125508
GBRR3_HUMAN	111320	Fear of death	1055	105	7.122477294225541e-48	7.68444246243053e-47	6.632422887077557
GBRR3_HUMAN	111320	Febrile bone marrow aplasia	1136	44	4.350096224736915e-07	1.1614418763316459e-06	2.4178900809335593
GBRR3_HUMAN	111320	Feeding disorder	3037	103	2.361765777780255e-11	8.601660967237578e-11	2.1066075226427077
GBRR3_HUMAN	111320	Feeding disorder neonatal	1228	93	3.794825245940205e-33	3.0392703544638954e-32	4.916925211439498
GBRR3_HUMAN	111320	Feeling drunk	3615	148	1.0833020296707013e-22	6.481994714255165e-22	2.561618135407597
GBRR3_HUMAN	111320	Feeling guilty	725	24	0.0017108512396099818	0.0029167223050979275	2.054469693979598
GBRR3_HUMAN	111320	Feeling of body temperature change	2741	89	4.239709163198909e-09	1.3318910847875126e-08	2.0138309096545552
GBRR3_HUMAN	111320	Feeling of despair	1768	91	1.019123238353661e-20	5.706553418263439e-20	3.256228290813271
GBRR3_HUMAN	111320	Fibrin D dimer increased	1569	70	2.4159142709469874e-13	9.852807088292697e-13	2.8022244797525815
GBRR3_HUMAN	111320	Fibrocystic breast disease	602	29	4.3439224606893256e-07	1.159869898653477e-06	3.0370356609155933
GBRR3_HUMAN	111320	Fibromyalgia	8227	322	2.062954080696997e-43	2.0513097815032638e-42	2.444333798568748
GBRR3_HUMAN	111320	Fibrosis	1581	62	9.74371302455151e-10	3.20185051087347e-09	2.449291250815813
GBRR3_HUMAN	111320	Fibula fracture	1346	54	4.824639071594139e-09	1.50937232872384e-08	2.508059074945295
GBRR3_HUMAN	111320	Fistula discharge	508	17	0.007206926046103676	0.010867575602333047	2.077657445956795
GBRR3_HUMAN	111320	Flat affect	1180	71	4.376437957843616e-20	2.39612549720732e-19	3.8417873136105567
GBRR3_HUMAN	111320	Fluid intake reduced	1902	66	3.4565971819020695e-08	1.0124236679411665e-07	2.157137229068175
GBRR3_HUMAN	111320	Foetal growth retardation	896	48	2.6256781643278663e-12	1.0115795630245991e-11	3.396658621414382
GBRR3_HUMAN	111320	Food aversion	549	21	0.0004996501534338192	0.0009319748364851417	2.3866673267892726
GBRR3_HUMAN	111320	Food intolerance	1071	37	3.275165595906696e-05	7.187043768689755e-05	2.1472751633119294
GBRR3_HUMAN	111320	Fractured sacrum	525	21	0.00021394114288636812	0.0004216726798603159	2.500318151874476
GBRR3_HUMAN	111320	Gamma-glutamyltransferase increased	12536	715	1.8188655813167614e-173	6.294779173457062e-172	3.6295964373712892
GBRR3_HUMAN	111320	Gastric dilatation	609	23	0.0002937952911508394	0.000567700104017715	2.3552484980114516
GBRR3_HUMAN	111320	Gastric polyps	978	46	5.02473771440189e-10	1.6835296044373752e-09	2.9617502571560315
GBRR3_HUMAN	111320	Gastric ulcer	8680	291	1.9041841465778114e-28	1.3539531066484106e-27	2.0815618038730883
GBRR3_HUMAN	111320	Gastric ulcer perforation	559	24	2.658626887393851e-05	5.898600670204537e-05	2.691931318653641
GBRR3_HUMAN	111320	Gastritis	12548	486	2.3644000184474918e-63	3.224413166471607e-62	2.417817188149883
GBRR3_HUMAN	111320	Gastritis erosive	2351	94	2.760207948569653e-14	1.1826842981249317e-13	2.499210345870101
GBRR3_HUMAN	111320	Gastritis haemorrhagic	674	25	0.00019774319499275817	0.00039170186820486564	2.311542205122782
GBRR3_HUMAN	111320	Gastrointestinal hypomotility	788	33	1.6239175305402523e-06	4.107044617438834e-06	2.6228502997146825
GBRR3_HUMAN	111320	Gastrointestinal necrosis	1437	52	3.426615335982128e-07	9.231215759000449e-07	2.252994262483282
GBRR3_HUMAN	111320	Gaze palsy	713	44	1.9266955570267136e-13	7.899994593180473e-13	3.9466905356942403
GBRR3_HUMAN	111320	General physical condition abnormal	2134	77	4.238181903049225e-10	1.4269328186867167e-09	2.246275131095786
GBRR3_HUMAN	111320	General physical health deterioration	36763	1410	2.0495256565246484e-177	7.239867998732145e-176	2.393312201494421
GBRR3_HUMAN	111320	Generalised anxiety disorder	610	60	7.78342008089827e-28	5.44034662517905e-27	6.546287524907719
GBRR3_HUMAN	111320	Generalised oedema	5647	187	2.7944678048438658e-18	1.4294258513768e-17	2.0552065687935253
GBRR3_HUMAN	111320	Gingival infection	941	32	0.00015169464778724484	0.00030546100226085425	2.112480022705828
GBRR3_HUMAN	111320	Gingival recession	852	28	0.0006333478655360221	0.0011617345672867041	2.039094415120932
GBRR3_HUMAN	111320	Glucose tolerance impaired	2438	108	1.8545007951602838e-19	9.918602481479929e-19	2.7814698067204473
GBRR3_HUMAN	111320	Glucose urine present	610	20	0.003645549067629124	0.0058471265532965815	2.0341571405080483
GBRR3_HUMAN	111320	Goitre	2062	99	2.6670629045523736e-20	1.471197645231322e-19	3.0263657304400176
GBRR3_HUMAN	111320	Grand mal convulsion	12447	633	5.569197029931648e-131	1.468946290930232e-129	3.2152389845333538
GBRR3_HUMAN	111320	Grimacing	512	30	3.842909399952685e-09	1.211110884094693e-08	3.7349150816382215
GBRR3_HUMAN	111320	Gun shot wound	1381	76	3.5304265887682404e-19	1.8690518353762533e-18	3.4946975548038655
GBRR3_HUMAN	111320	Haemangioma	1093	43	2.7897308992154956e-07	7.573042573063175e-07	2.4574555549851995
GBRR3_HUMAN	111320	Haematemesis	11535	411	2.7614386283308554e-45	2.845782105801199e-44	2.217110594218791
GBRR3_HUMAN	111320	Haematocrit decreased	11489	455	3.3022450311155236e-62	4.4384814845453974e-61	2.4744856097942067
GBRR3_HUMAN	111320	Haematocrit increased	709	25	0.0004906125910180356	0.0009162267521333558	2.1932615367319963
GBRR3_HUMAN	111320	Haematoma	11522	437	9.182931090589497e-55	1.1077974905679003e-53	2.3656596100008573
GBRR3_HUMAN	111320	Haemodialysis	7444	313	3.092828550160029e-48	3.359737770076551e-47	2.633906879383125
GBRR3_HUMAN	111320	Haemodynamic instability	2660	194	1.4561582052185464e-64	2.0185059367163058e-63	4.720795342711906
GBRR3_HUMAN	111320	Haemoglobin increased	1267	46	1.144188081901131e-06	2.9381759365418034e-06	2.260729926019182
GBRR3_HUMAN	111320	Haemorrhoids	8616	336	6.587922776616849e-45	6.741509887136527e-44	2.4350924609560116
GBRR3_HUMAN	111320	Haemothorax	1256	45	1.9704380460152343e-06	4.939875441396976e-06	2.2298460809450322
GBRR3_HUMAN	111320	Hallucination	26485	1189	7.977044297621331e-201	3.186120482810513e-199	2.820567630530125
GBRR3_HUMAN	111320	Hallucination, auditory	6711	399	5.414567838055367e-103	1.1343004968189616e-101	3.793258336874205
GBRR3_HUMAN	111320	Hallucination, visual	7700	392	6.052442820451095e-82	1.0359700803918158e-80	3.218800379424613
GBRR3_HUMAN	111320	Hallucinations, mixed	1562	105	8.440879144037445e-33	6.707403440070458e-32	4.324503598300398
GBRR3_HUMAN	111320	Hangover	1526	56	5.2720216464678735e-08	1.5219090413110602e-07	2.286005167428092
GBRR3_HUMAN	111320	Head injury	12380	502	1.3246800579605866e-71	2.012089101878237e-70	2.536103139735956
GBRR3_HUMAN	111320	Head titubation	598	25	2.8299512359248874e-05	6.2576817354691e-05	2.618134190444477
GBRR3_HUMAN	111320	Heart rate decreased	11996	425	2.983708758448511e-46	3.129140613848773e-45	2.204065780755307
GBRR3_HUMAN	111320	Heat stroke	548	24	1.9381246732884726e-05	4.370165169486112e-05	2.7484413272513324
GBRR3_HUMAN	111320	Helicobacter gastritis	562	29	1.056934209963848e-07	2.9758045956608156e-07	3.2649557855621674
GBRR3_HUMAN	111320	Hemiparesis	8360	272	7.457437611928972e-25	4.77960149562771e-24	2.0180609415722777
GBRR3_HUMAN	111320	Heparin-induced thrombocytopenia	2740	101	2.8993107643342577e-13	1.1772899035302963e-12	2.296616597250371
GBRR3_HUMAN	111320	Hepatic congestion	839	79	8.799050412899288e-35	7.317651263273878e-34	6.2376358104657985
GBRR3_HUMAN	111320	Hepatic cyst	1613	79	5.1616638967355156e-17	2.5073017145628826e-16	3.090354117310304
GBRR3_HUMAN	111320	Hepatic encephalopathy	4116	173	1.622740726150373e-27	1.1240184996930256e-26	2.6328483303532395
GBRR3_HUMAN	111320	Hepatic failure	14690	513	1.40403686474786e-53	1.6635336071953275e-52	2.1713985388924697
GBRR3_HUMAN	111320	Hepatic function abnormal	14160	639	1.3424291298748563e-109	2.9785756494124307e-108	2.8359499428405415
GBRR3_HUMAN	111320	Hepatic lesion	1638	64	5.83424499734511e-10	1.945987347995645e-09	2.439954689503936
GBRR3_HUMAN	111320	Hepatic necrosis	2484	89	3.792025700026783e-11	1.363889139307756e-10	2.229928840252142
GBRR3_HUMAN	111320	Hepatic steatosis	8330	476	2.2752206896498148e-116	5.342446974313284e-115	3.6368264027265105
GBRR3_HUMAN	111320	Hepatitis	10691	369	4.75916281127136e-38	4.252641863187959e-37	2.1452061182910636
GBRR3_HUMAN	111320	Hepatitis C	6218	213	3.165753114078832e-22	1.864790892172212e-21	2.12849731763236
GBRR3_HUMAN	111320	Hepatitis acute	2882	151	4.7678208013238025e-34	3.8995350153124095e-33	3.3178883128499086
GBRR3_HUMAN	111320	Hepatitis cholestatic	2571	115	6.329019302361898e-21	3.5685030360220276e-20	2.8098037863084504
GBRR3_HUMAN	111320	Hepatitis fulminant	1553	88	9.2328951193125e-23	5.536184365572001e-22	3.604554223043613
GBRR3_HUMAN	111320	Hepatitis toxic	1331	48	7.501935523888108e-07	1.9595904697404867e-06	2.2450245603736527
GBRR3_HUMAN	111320	Hepatocellular injury	6243	366	5.939400103429559e-93	1.131349090112461e-91	3.737075828835358
GBRR3_HUMAN	111320	Hepatomegaly	5369	236	6.848628832453726e-40	6.356040271323074e-39	2.758971753792525
GBRR3_HUMAN	111320	Hepatorenal syndrome	925	52	5.342051835393902e-14	2.2555856780220796e-13	3.5743379765628243
GBRR3_HUMAN	111320	Hepatosplenomegaly	1371	62	3.023157310955835e-12	1.1605021043820501e-11	2.842225676080382
GBRR3_HUMAN	111320	Hiatus hernia	6437	322	6.252455909857027e-66	8.838193371581552e-65	3.159846063399174
GBRR3_HUMAN	111320	Homicidal ideation	2768	151	5.869317978486835e-36	5.013012294085436e-35	3.4624199397757356
GBRR3_HUMAN	111320	Homicide	1140	75	2.2540805906095404e-23	1.3786706927005232e-22	4.225889834154044
GBRR3_HUMAN	111320	Hostility	1745	99	1.987977170129052e-25	1.2952317055660643e-24	3.6092077332039825
GBRR3_HUMAN	111320	Humerus fracture	2099	74	2.6365428151202037e-09	8.413127477376149e-09	2.192871623569911
GBRR3_HUMAN	111320	Hyperacusis	1506	67	8.693144104875821e-13	3.440272064063803e-12	2.793962187779123
GBRR3_HUMAN	111320	Hyperaemia	755	33	6.46665533213729e-07	1.6994409416188081e-06	2.742731269092223
GBRR3_HUMAN	111320	Hyperaesthesia	3816	135	8.410059062558693e-16	3.873186964895367e-15	2.2007690334347463
GBRR3_HUMAN	111320	Hyperammonaemia	1860	107	8.041811285286409e-28	5.618706372307028e-27	3.662759277817259
GBRR3_HUMAN	111320	Hyperammonaemic encephalopathy	505	23	1.553107085878857e-05	3.539239011035071e-05	2.8634348959226363
GBRR3_HUMAN	111320	Hypercalcaemia	4656	161	1.1402964190790539e-17	5.690762668799197e-17	2.149327995293209
GBRR3_HUMAN	111320	Hypercapnia	1170	129	1.4713511415592343e-63	2.0124878997732464e-62	7.436104705286626
GBRR3_HUMAN	111320	Hypercholesterolaemia	4390	202	4.71831194995302e-37	4.1290084790555966e-36	2.8943510984449516
GBRR3_HUMAN	111320	Hyperglycaemia	16074	602	5.005560445997222e-73	7.737552262975866e-72	2.3348369091444177
GBRR3_HUMAN	111320	Hyperhidrosis	54579	2063	6.012178527039117e-252	3.0348148452430866e-250	2.357295916208566
GBRR3_HUMAN	111320	Hyperkalaemia	13712	657	4.190222515270006e-124	1.0491032423781158e-122	3.0199170140755833
GBRR3_HUMAN	111320	Hyperkinesia	510	37	1.272058822102794e-13	5.265529000547778e-13	4.694043380263286
GBRR3_HUMAN	111320	Hyperlactacidaemia	664	23	0.0010211385679997466	0.0018108507003031463	2.1531600933458828
GBRR3_HUMAN	111320	Hyperlipidaemia	7980	432	2.398756861283337e-98	4.826391046137076e-97	3.4344592737989625
GBRR3_HUMAN	111320	Hypernatraemia	1989	121	1.9103859605515835e-33	1.5414730522594e-32	3.887004236104646
GBRR3_HUMAN	111320	Hyperparathyroidism	1074	40	2.8966892121732385e-06	7.1376793460315025e-06	2.3213785549318153
GBRR3_HUMAN	111320	Hyperphagia	1446	73	1.6063022666519733e-16	7.640858791940965e-16	3.1905006570168113
GBRR3_HUMAN	111320	Hyperplasia	516	19	0.001301273820494833	0.002265679931583816	2.2940544813979096
GBRR3_HUMAN	111320	Hyperpyrexia	1139	61	3.387772346881252e-15	1.5172490833722797e-14	3.39560832499465
GBRR3_HUMAN	111320	Hyperreflexia	1723	152	1.6329173780409608e-61	2.1737040334549802e-60	5.805958381946587
GBRR3_HUMAN	111320	Hypersexuality	773	28	0.00015582640129578005	0.0003132476938197968	2.255320534308252
GBRR3_HUMAN	111320	Hypersomnia	10560	377	7.823592320253724e-42	7.543472120596486e-41	2.221631998248086
GBRR3_HUMAN	111320	Hypertensive crisis	4270	159	2.4769683315885455e-20	1.3679236599774065e-19	2.320898581258331
GBRR3_HUMAN	111320	Hypertensive heart disease	1285	89	5.435726028187673e-29	3.9230283583193344e-28	4.465451147494884
GBRR3_HUMAN	111320	Hyperthermia	3212	274	6.156149107848835e-106	1.3225609120278493e-104	5.596355400519589
GBRR3_HUMAN	111320	Hyperthermia malignant	806	88	1.3545419007198056e-43	1.3520151774704258e-42	7.354696290750548
GBRR3_HUMAN	111320	Hyperthyroidism	4583	148	4.906009270785007e-14	2.0756674881018337e-13	2.0025095998778215
GBRR3_HUMAN	111320	Hypertonia	3754	199	5.1850454466378666e-45	5.314886300168602e-44	3.3590772133199716
GBRR3_HUMAN	111320	Hypertonic bladder	1029	39	2.969085545106464e-06	7.308164969888095e-06	2.3639371617722316
GBRR3_HUMAN	111320	Hypertriglyceridaemia	2244	139	5.501282437614455e-39	5.013079063078009e-38	3.962499455892281
GBRR3_HUMAN	111320	Hypertrophic cardiomyopathy	619	26	1.8335843339580576e-05	4.146016635199742e-05	2.63102618342272
GBRR3_HUMAN	111320	Hyperventilation	2879	129	2.5260505167527568e-23	1.5424851998062258e-22	2.8149036357103188
GBRR3_HUMAN	111320	Hypoalbuminaemia	3124	120	1.0092684314210163e-16	4.842080457209474e-16	2.3971092800927063
GBRR3_HUMAN	111320	Hypocoagulable state	580	19	0.004728177141584162	0.007410198111983391	2.032344166229521
GBRR3_HUMAN	111320	Hypogammaglobulinaemia	1160	43	1.331943098354426e-06	3.397756040387999e-06	2.3100522226808047
GBRR3_HUMAN	111320	Hypoglycaemia neonatal	801	32	7.798610882222132e-06	1.8362450895897274e-05	2.497066762860335
GBRR3_HUMAN	111320	Hypokalaemia	17632	877	6.507431177451618e-175	2.2708704911906892e-173	3.140954727583048
GBRR3_HUMAN	111320	Hypokinesia	5261	196	1.0380541097760003e-24	6.62096311365217e-24	2.3221118630636792
GBRR3_HUMAN	111320	Hypomagnesaemia	4457	167	1.5609434016710252e-21	8.984676975316664e-21	2.3359615740589508
GBRR3_HUMAN	111320	Hypomania	1480	90	2.563965338089405e-25	1.6652837656489754e-24	3.8853864806106966
GBRR3_HUMAN	111320	Hyponatraemia	22684	1458	0.0	0.0	4.121885082935629
GBRR3_HUMAN	111320	Hypophagia	12533	423	3.8907582746568934e-41	3.69875232392935e-40	2.0960553160883304
GBRR3_HUMAN	111320	Hypopnoea	1070	69	3.6059318830525796e-21	2.0507087286910975e-20	4.136390469035097
GBRR3_HUMAN	111320	Hypoproteinaemia	854	46	6.11551697969031e-12	2.304495760686563e-11	3.416276286719581
GBRR3_HUMAN	111320	Hyporeflexia	1191	79	9.471916148041416e-25	6.051700368639346e-24	4.263132388447848
GBRR3_HUMAN	111320	Hypotension	75948	3379	0.0	0.0	2.7941104444654394
GBRR3_HUMAN	111320	Hypothermia	3982	290	2.01973474661023e-95	3.9412837704786067e-94	4.713492507325665
GBRR3_HUMAN	111320	Hypothyroidism	11479	412	3.3653293907592074e-46	3.526115607874122e-45	2.2339519188339043
GBRR3_HUMAN	111320	Hypotonia	5031	287	9.228617473009102e-71	1.3881959572955257e-69	3.6303101665496187
GBRR3_HUMAN	111320	Hypotonia neonatal	747	66	9.319326863918646e-28	6.501118392320998e-27	5.815717992025213
GBRR3_HUMAN	111320	Hypoventilation	1810	181	1.627741792353197e-81	2.774049901102355e-80	6.667515071665269
GBRR3_HUMAN	111320	Hypovolaemia	3116	172	2.3960829042594845e-41	2.288245301932252e-40	3.505880886867472
GBRR3_HUMAN	111320	Hypovolaemic shock	1715	67	2.3109193610888e-10	7.917334976240928e-10	2.439630818091115
GBRR3_HUMAN	111320	Hypoxia	13091	736	4.080707192714334e-175	1.4253517444596004e-173	3.574716295808235
GBRR3_HUMAN	111320	Iatrogenic injury	1162	49	4.8897599826361925e-09	1.5291225791991575e-08	2.6418455944334083
GBRR3_HUMAN	111320	Ileus	5380	243	6.742813891188352e-43	6.638273817908091e-42	2.83859362696748
GBRR3_HUMAN	111320	Ileus paralytic	2132	115	2.105326484989403e-27	1.4534927535240892e-26	3.4213575107454406
GBRR3_HUMAN	111320	Ill-defined disorder	13216	552	5.725002937215361e-83	9.902565698985546e-82	2.61562025237153
GBRR3_HUMAN	111320	Illusion	697	44	8.88758243556828e-14	3.709210420645101e-13	4.043393519723502
GBRR3_HUMAN	111320	Impaired driving ability	5770	216	2.897776265393812e-27	1.992597993117008e-26	2.333750323967822
GBRR3_HUMAN	111320	Impaired gastric emptying	2740	107	1.6858527753107854e-15	7.65692467743794e-15	2.4385936247678144
GBRR3_HUMAN	111320	Impaired self-care	997	62	1.9660996921129365e-18	1.0117846125268196e-17	3.979115946512535
GBRR3_HUMAN	111320	Impatience	814	27	0.0007417982233730073	0.0013454157617564242	2.058711769268946
GBRR3_HUMAN	111320	Implantable defibrillator insertion	801	30	3.949881938931508e-05	8.5832010288738e-05	2.3349274570034013
GBRR3_HUMAN	111320	Imprisonment	590	30	8.86046545445475e-08	2.51079161740747e-07	3.2146947666957546
GBRR3_HUMAN	111320	Impulse-control disorder	775	31	1.085188009942751e-05	2.515151003122358e-05	2.5003181518744757
GBRR3_HUMAN	111320	Impulsive behaviour	1706	111	2.467494377317403e-33	1.9854675988776405e-32	4.176079972785959
GBRR3_HUMAN	111320	Inappropriate affect	878	32	4.3561979213443795e-05	9.41708446839642e-05	2.2697923648222194
GBRR3_HUMAN	111320	Inappropriate antidiuretic hormone secretion	3748	233	2.2543573919162752e-64	3.116520604085736e-63	3.9777465448882134
GBRR3_HUMAN	111320	Incoherent	3658	188	7.990530569293629e-41	7.551801204530802e-40	3.2511341502183386
GBRR3_HUMAN	111320	Incontinence	4589	183	1.992281814441026e-26	1.336518544650503e-25	2.492373427833114
GBRR3_HUMAN	111320	Increased bronchial secretion	784	39	2.147538707097277e-09	6.896609097284754e-09	3.1413393156436373
GBRR3_HUMAN	111320	Infantile apnoeic attack	638	62	2.0346067070942228e-28	1.4453811123288998e-27	6.45915522567573
GBRR3_HUMAN	111320	Ingrowing nail	909	38	2.9334778918429355e-07	7.946619597098404e-07	2.61801395466076
GBRR3_HUMAN	111320	Inhibitory drug interaction	762	44	1.7875495153639757e-12	6.9540998299012615e-12	3.677348145375274
GBRR3_HUMAN	111320	Initial insomnia	4197	158	1.1256168540778943e-20	6.294621410973188e-20	2.3474143183728677
GBRR3_HUMAN	111320	Injury	49065	2053	6.951641006919328e-306	4.334334505440836e-304	2.620515527507002
GBRR3_HUMAN	111320	Insomnia	110134	3966	0.0	0.0	2.241638563107717
GBRR3_HUMAN	111320	Intentional drug misuse	24159	1067	2.1889270298945464e-175	7.657848731363767e-174	2.7727415223108256
GBRR3_HUMAN	111320	Intentional overdose	18664	1607	0.0	0.0	5.653530543559524
GBRR3_HUMAN	111320	Intentional self-injury	4675	517	1.2347949105348091e-249	6.169078546402464e-248	7.461266865911134
GBRR3_HUMAN	111320	Intercepted medication error	541	21	0.00044887523574773855	0.0008431119595073923	2.423385285662954
GBRR3_HUMAN	111320	Intermittent claudication	970	52	3.280455748447078e-13	1.328231806747399e-12	3.399125330652882
GBRR3_HUMAN	111320	Intervertebral disc degeneration	4815	303	2.246942283485821e-84	3.938356979977757e-83	4.0297680852019475
GBRR3_HUMAN	111320	Intervertebral disc disorder	2350	135	1.4229994192692378e-34	1.1776185677358089e-33	3.6573502537576985
GBRR3_HUMAN	111320	Intervertebral disc operation	587	20	0.0027248878925939897	0.004479653859554004	2.1166714513223077
GBRR3_HUMAN	111320	Intervertebral disc protrusion	10144	486	2.892441739155398e-92	5.472257368206958e-91	3.0196428788013967
GBRR3_HUMAN	111320	Intervertebral discitis	612	30	1.930162333070329e-07	5.313549343875822e-07	3.0931770951024444
GBRR3_HUMAN	111320	Intestinal dilatation	673	32	1.5278085656635765e-07	4.243254171469052e-07	2.99570099943775
GBRR3_HUMAN	111320	Intestinal infarction	620	20	0.0060905383810648545	0.009327642306432434	2.000254521499581
GBRR3_HUMAN	111320	Intestinal ischaemia	2442	131	9.65238108146564e-31	7.295856966907001e-30	3.4015578838136533
GBRR3_HUMAN	111320	Intra-abdominal haematoma	708	26	0.00016958889665577345	0.00033927131867505996	2.287681124295708
GBRR3_HUMAN	111320	Intra-abdominal haemorrhage	1127	40	9.354272914727447e-06	2.1840377457472692e-05	2.208192664028976
GBRR3_HUMAN	111320	Intracranial hypotension	1028	43	5.06139401125563e-08	1.4634102660663858e-07	2.619622672826862
GBRR3_HUMAN	111320	Iron deficiency	1191	51	1.4618501899514012e-09	4.748481150475642e-09	2.6845521209599634
GBRR3_HUMAN	111320	Iron deficiency anaemia	3800	182	1.0535232889020924e-35	8.94738361648954e-35	3.018626226475321
GBRR3_HUMAN	111320	Irritability	27173	962	2.41813739482385e-102	5.036832054221507e-101	2.2024091217610122
GBRR3_HUMAN	111320	Ischaemia	2807	130	9.87380192879445e-25	6.304853157551708e-24	2.914080177007234
GBRR3_HUMAN	111320	Ischaemic cardiomyopathy	2270	83	4.951976321997426e-11	1.7677267609123111e-10	2.277381691144927
GBRR3_HUMAN	111320	Ischaemic hepatitis	618	37	3.5144916960179696e-11	1.2667057692482043e-10	3.8214845419355163
GBRR3_HUMAN	111320	Jaundice cholestatic	1756	63	2.5847457571161983e-08	7.645368653278545e-08	2.2330071149640918
GBRR3_HUMAN	111320	Jaw fracture	1080	43	2.1034448417722796e-07	5.771114751314606e-07	2.4882626159445125
GBRR3_HUMAN	111320	Jaw operation	615	28	2.0125629688071465e-06	5.041056729346935e-06	2.8623744430317677
GBRR3_HUMAN	111320	Joint contracture	677	33	5.591841771861072e-08	1.610697298343064e-07	3.074925429013331
GBRR3_HUMAN	111320	Joint dislocation	4035	142	2.3557408975680276e-16	1.1124772913379408e-15	2.1888220553784263
GBRR3_HUMAN	111320	Joint effusion	2854	102	1.5733423749620801e-12	6.138744827424983e-12	2.2241202164929934
GBRR3_HUMAN	111320	Joint sprain	1280	73	2.52425075072752e-19	1.3429976512453945e-18	3.6292936222734733
GBRR3_HUMAN	111320	Judgement impaired	719	47	3.6453792697797944e-15	1.6300788972649578e-14	4.196962612075013
GBRR3_HUMAN	111320	Jugular vein thrombosis	848	29	0.00032644710911517035	0.0006265012949287009	2.1248124953658545
GBRR3_HUMAN	111320	Klebsiella infection	1559	64	8.205441595418826e-11	2.8899096085263667e-10	2.568888750019529
GBRR3_HUMAN	111320	Kyphosis	918	63	8.023793643758202e-21	4.5088159545079864e-20	4.4216152580517045
GBRR3_HUMAN	111320	Labelled drug-drug interaction medication error	1310	55	1.0882016750220815e-09	3.56491538729285e-09	2.6298167015731537
GBRR3_HUMAN	111320	Labile blood pressure	653	50	8.33444743747699e-19	4.350472020292731e-18	4.975757516168112
GBRR3_HUMAN	111320	Laboratory test interference	510	22	5.237424398703222e-05	0.00011209764289718505	2.705262262683859
GBRR3_HUMAN	111320	Labyrinthitis	1319	50	1.0113322298198947e-07	2.852680633777612e-07	2.3643670466898117
GBRR3_HUMAN	111320	Laceration	7208	242	7.034973629066695e-24	4.3732201791272185e-23	2.0846752549651097
GBRR3_HUMAN	111320	Lacunar infarction	1686	81	6.199673311579428e-17	3.001423439342689e-16	3.0284227334853466
GBRR3_HUMAN	111320	Large intestinal obstruction	544	21	0.00046636189008753703	0.0008737760249164016	2.409484414043472
GBRR3_HUMAN	111320	Large intestinal ulcer	1112	45	7.51864430011338e-08	2.142663991449583e-07	2.530781259629273
GBRR3_HUMAN	111320	Laryngospasm	1281	65	5.410148416981473e-15	2.399090743163518e-14	3.207644997470545
GBRR3_HUMAN	111320	Left atrial dilatation	922	79	5.588265679842425e-32	4.354671257058561e-31	5.623491359376046
GBRR3_HUMAN	111320	Left ventricular dysfunction	2527	119	2.2765387816648015e-23	1.392096103901617e-22	2.9654936219906576
GBRR3_HUMAN	111320	Left ventricular failure	1499	58	5.088366980750678e-09	1.589274701233995e-08	2.4152969239481403
GBRR3_HUMAN	111320	Left ventricular hypertrophy	2279	185	8.991247890354513e-69	1.319174568281105e-67	5.301534190220952
GBRR3_HUMAN	111320	Legal problem	521	23	2.521913842039162e-05	5.609607666752527e-05	2.771436987619901
GBRR3_HUMAN	111320	Lethargy	24564	899	4.559875938765855e-103	9.559420767257574e-102	2.2796055121421377
GBRR3_HUMAN	111320	Leukocytosis	7970	392	7.492215074961221e-78	1.2246567949691015e-76	3.104116280395232
GBRR3_HUMAN	111320	Leukoencephalopathy	1792	60	5.311702608701567e-07	1.4067019450530179e-06	2.078786454214345
GBRR3_HUMAN	111320	Libido increased	1069	35	0.00015514318023249966	0.0003119522017835847	2.0312062355653384
GBRR3_HUMAN	111320	Lichenoid keratosis	655	22	0.0017669267627965593	0.003006068435352456	2.0855734347388992
GBRR3_HUMAN	111320	Ligament sprain	3055	107	1.2762132032769643e-12	5.003752881774297e-12	2.178024767304496
GBRR3_HUMAN	111320	Lip disorder	914	35	5.973485515766323e-06	1.4244266484919073e-05	2.3893825342145165
GBRR3_HUMAN	111320	Lipoma	1096	48	2.1368380115663313e-09	6.863152059301636e-09	2.7484413272513324
GBRR3_HUMAN	111320	Listless	1468	57	6.271471384467267e-09	1.9455879627251803e-08	2.4241213549002714
GBRR3_HUMAN	111320	Livedo reticularis	937	59	7.207250339000653e-18	3.6263778351539374e-17	4.032403762020795
GBRR3_HUMAN	111320	Lobar pneumonia	2140	89	9.60725498284653e-15	4.207645612342079e-14	2.6039393332052074
GBRR3_HUMAN	111320	Logorrhoea	1834	104	1.3139033474827993e-26	8.859380399898532e-26	3.607395437617741
GBRR3_HUMAN	111320	Long QT syndrome	681	62	7.059341146760083e-27	4.797398305053047e-26	6.010457851355767
GBRR3_HUMAN	111320	Loose tooth	1599	68	4.359202066980271e-12	1.6573983725936316e-11	2.6652640260347127
GBRR3_HUMAN	111320	Loss of consciousness	57314	2476	0.0	0.0	2.709415110999468
GBRR3_HUMAN	111320	Loss of employment	1811	72	2.5293207872180922e-11	9.193836507069661e-11	2.484502453386483
GBRR3_HUMAN	111320	Lumbar radiculopathy	740	48	2.513915314280358e-15	1.13281957930004e-14	4.162379351097393
GBRR3_HUMAN	111320	Lumbar spinal stenosis	1683	95	2.5722456784607343e-24	1.6215928388506317e-23	3.5898774472756956
GBRR3_HUMAN	111320	Lumbar vertebral fracture	1619	55	1.0439329706738954e-06	2.6910225799228886e-06	2.110242941479737
GBRR3_HUMAN	111320	Lung abscess	787	31	1.31677470714659e-05	3.0259992216830497e-05	2.4606305621621827
GBRR3_HUMAN	111320	Lung consolidation	1452	77	1.6564719031267218e-18	8.550280364044955e-18	3.3604275961192958
GBRR3_HUMAN	111320	Lung infiltration	6119	248	3.833632568624204e-36	3.2873967728031894e-35	2.534814110025018
GBRR3_HUMAN	111320	Lung neoplasm	3324	142	1.5150821082080275e-23	9.317509602944854e-23	2.6779020306688293
GBRR3_HUMAN	111320	Lymphadenopathy mediastinal	735	37	3.979133609308922e-09	1.2526445491703963e-08	3.180920514132571
GBRR3_HUMAN	111320	Lymphocyte count decreased	4836	187	2.6072591405774703e-25	1.6929690258787994e-24	2.413729375266218
GBRR3_HUMAN	111320	Lymphocyte count increased	1087	40	3.658991035191703e-06	8.925455755496846e-06	2.292555325500952
GBRR3_HUMAN	111320	Lymphocyte percentage decreased	790	56	2.505337344762072e-19	1.333102912802877e-18	4.578239231770158
GBRR3_HUMAN	111320	Lymphocyte stimulation test positive	941	57	1.3999097697402527e-16	6.676478010199262e-16	3.869270624167741
GBRR3_HUMAN	111320	Lymphocytic infiltration	535	21	0.00041919817876217907	0.0007906737324293852	2.4516738298535716
GBRR3_HUMAN	111320	Lymphoedema	2173	74	1.4056441218935129e-08	4.2458906006884756e-08	2.1155621904378608
GBRR3_HUMAN	111320	Macrocytosis	542	47	6.395488844558969e-20	3.481243218767285e-19	5.697694697604866
GBRR3_HUMAN	111320	Major depression	2993	195	2.908783370241959e-57	3.6410361167103292e-56	4.182090404136007
GBRR3_HUMAN	111320	Malignant hypertension	507	19	0.0011300925719733505	0.0019878817779709805	2.3363628632269693
GBRR3_HUMAN	111320	Mallory-Weiss syndrome	711	23	0.0026103468682440365	0.0043067441669775545	2.006069214876033
GBRR3_HUMAN	111320	Malnutrition	4794	234	1.0677363177053007e-46	1.1281479568995582e-45	3.079339197571723
GBRR3_HUMAN	111320	Mania	8073	453	3.4239184491683694e-108	7.501581509787674e-107	3.5673830639342916
GBRR3_HUMAN	111320	Mass	5270	187	2.1326171586474335e-21	1.222141105199341e-20	2.207638769548032
GBRR3_HUMAN	111320	Mastication disorder	1253	60	6.516472824862873e-13	2.597021938858244e-12	3.017986704693416
GBRR3_HUMAN	111320	Mastitis	641	23	0.0008014444486511417	0.0014446673048240585	2.233293883227687
GBRR3_HUMAN	111320	Mean cell volume increased	672	40	6.970133874766478e-12	2.6181014098877365e-11	3.79795162310047
GBRR3_HUMAN	111320	Mechanical ventilation	1051	51	2.0279148857691334e-11	7.415946992386779e-11	3.0603894178943585
GBRR3_HUMAN	111320	Megacolon	694	39	6.838238274229012e-11	2.4199738767496973e-10	3.572973725426732
GBRR3_HUMAN	111320	Melaena	9301	318	2.838355488987838e-32	2.226876949598379e-31	2.124282326072136
GBRR3_HUMAN	111320	Meniere's disease	638	40	1.410730614792525e-12	5.518360485474198e-12	4.013888671905513
GBRR3_HUMAN	111320	Mental disorder	17333	770	2.8955078316956906e-128	7.473540846782441e-127	2.78970473022039
GBRR3_HUMAN	111320	Mental impairment	10199	403	4.946732045244135e-55	5.990022606513034e-54	2.4686685550153054
GBRR3_HUMAN	111320	Mental status changes	14127	631	2.1208567218299247e-106	4.576336947909282e-105	2.805632638706807
GBRR3_HUMAN	111320	Metabolic acidosis	10867	589	1.2219851811395877e-133	3.281193841452988e-132	3.4388497173474986
GBRR3_HUMAN	111320	Metabolic alkalosis	569	27	1.4074945352632573e-06	3.582219936684544e-06	2.989310262757676
GBRR3_HUMAN	111320	Metabolic encephalopathy	1165	96	4.2560994527075325e-37	3.728322725664859e-36	5.388898991504951
GBRR3_HUMAN	111320	Metabolic syndrome	838	50	1.7055377041645657e-14	7.378371172199661e-14	3.8075910942250903
GBRR3_HUMAN	111320	Metastases to bone	4849	205	1.2740552896481146e-32	1.008147306456307e-31	2.6489158714949226
GBRR3_HUMAN	111320	Metastases to spine	1243	75	3.433899880780669e-21	1.9547519123029477e-20	3.853230028573679
GBRR3_HUMAN	111320	Methaemoglobinaemia	699	55	4.6200817939276975e-21	2.6173449999051866e-20	5.124875715022217
GBRR3_HUMAN	111320	Microcephaly	541	62	2.0068573124401266e-32	1.5806774133555173e-31	7.767167870541169
GBRR3_HUMAN	111320	Microcytic anaemia	935	43	3.4582772063674094e-09	1.0935298002823224e-08	2.8927447676395284
GBRR3_HUMAN	111320	Micturition urgency	4327	142	5.223004760616758e-14	2.2065792899270732e-13	2.036101376723588
GBRR3_HUMAN	111320	Migraine with aura	1047	45	1.1488564299443391e-08	3.493014809404875e-08	2.6949536966311713
GBRR3_HUMAN	111320	Miosis	2735	266	4.761480682185802e-116	1.1155371847635422e-114	6.464978161833396
GBRR3_HUMAN	111320	Mitral valve disease	1071	46	8.144293002253634e-09	2.5057330365715233e-08	2.6930255996774846
GBRR3_HUMAN	111320	Mitral valve incompetence	6732	414	2.0823822949321143e-111	4.700733914031716e-110	3.932124273033364
GBRR3_HUMAN	111320	Mitral valve prolapse	1165	53	8.589330617960721e-11	3.0209884021600046e-10	2.8600761593384294
GBRR3_HUMAN	111320	Monocyte count increased	1092	81	1.6995035522567921e-28	1.2102418575020382e-27	4.8077334196280725
GBRR3_HUMAN	111320	Monoparesis	804	31	1.8126401515085085e-05	4.1007440573223895e-05	2.4065157891262743
GBRR3_HUMAN	111320	Monoplegia	2023	73	1.2571081137879984e-09	4.100465059235285e-09	2.2464396933764523
GBRR3_HUMAN	111320	Morbid thoughts	704	42	1.979047492058939e-12	7.68083858241641e-12	3.8071309623708034
GBRR3_HUMAN	111320	Motor dysfunction	3915	159	5.4624642871992235e-24	3.4076591458404395e-23	2.540259336409212
GBRR3_HUMAN	111320	Mouth haemorrhage	2960	119	5.151993128713871e-18	2.6064655558132848e-17	2.513519409276136
GBRR3_HUMAN	111320	Mucosal dryness	792	38	8.91211607010823e-09	2.733678824197099e-08	3.024257499349499
GBRR3_HUMAN	111320	Multi-organ failure	18510	1176	0.0	0.0	4.07113069796384
GBRR3_HUMAN	111320	Multiple drug overdose	5505	807	0.0	0.0	10.307825024585963
GBRR3_HUMAN	111320	Multiple drug overdose intentional	3613	489	3.326807231116154e-276	1.849586327022568e-274	9.393000585915125
GBRR3_HUMAN	111320	Multiple fractures	3462	132	5.74663052664319e-18	2.901826872954211e-17	2.3786810525940965
GBRR3_HUMAN	111320	Multiple injuries	9301	341	2.5284600459122614e-40	2.3664886749913183e-39	2.2837727405067763
GBRR3_HUMAN	111320	Muscle contractions involuntary	1738	84	1.1946608962640079e-17	5.957645307065244e-17	3.047546187532614
GBRR3_HUMAN	111320	Muscle contracture	982	57	8.840685064013046e-16	4.06733242205945e-15	3.697767818123549
GBRR3_HUMAN	111320	Muscle rigidity	4888	371	5.525032469264918e-127	1.4140309396448774e-125	4.928676737722013
GBRR3_HUMAN	111320	Muscle spasticity	6076	214	7.271645895556682e-24	4.5182394170373017e-23	2.1906574595747714
GBRR3_HUMAN	111320	Muscle twitching	10232	343	3.2666435147957574e-33	2.620639592561637e-32	2.0813650547305778
GBRR3_HUMAN	111320	Mutism	657	53	7.742023266457102e-21	4.3525554272762783e-20	5.265570677457506
GBRR3_HUMAN	111320	Mydriasis	5490	370	3.1867662461883096e-111	7.182236097759626e-110	4.336489294657294
GBRR3_HUMAN	111320	Myelopathy	636	21	0.0026691625160830852	0.0043958628014561674	2.049041217145912
GBRR3_HUMAN	111320	Myocardial ischaemia	8172	307	2.2036284091443145e-38	1.982621063481056e-37	2.3423196621756057
GBRR3_HUMAN	111320	Myocarditis	2395	94	5.43143964230997e-14	2.2926310032809616e-13	2.451420143689186
GBRR3_HUMAN	111320	Myoclonic epilepsy	554	36	6.4872158687319375e-12	2.4413043283028227e-11	4.170414832470169
GBRR3_HUMAN	111320	Myoclonus	5130	369	2.7926050193956005e-119	6.723804495423502e-118	4.6508753524470405
GBRR3_HUMAN	111320	Myoglobin blood increased	917	48	5.871589083863036e-12	2.2144867329856738e-11	3.314575961978592
GBRR3_HUMAN	111320	Nasal septum deviation	783	30	2.7364832990416577e-05	6.061507732505562e-05	2.3907424559755945
GBRR3_HUMAN	111320	Neck injury	1402	67	3.451590411367209e-14	1.4720750588892376e-13	3.0116191672016166
GBRR3_HUMAN	111320	Neck mass	970	32	0.000309325395066987	0.0005956208950598312	2.047168806652023
GBRR3_HUMAN	111320	Necrotising colitis	619	27	6.5782723800379746e-06	1.561762285543587e-05	2.736834733808548
GBRR3_HUMAN	111320	Negative thoughts	1222	44	2.3656606001039766e-06	5.8850986020924625e-06	2.241371789795795
GBRR3_HUMAN	111320	Neonatal disorder	1646	104	2.594105366500477e-30	1.9393814981797882e-29	4.047207592139229
GBRR3_HUMAN	111320	Neonatal respiratory distress syndrome	2228	95	3.6794469500852977e-16	1.7226752665466374e-15	2.6726326236632936
GBRR3_HUMAN	111320	Nephrectomy	563	20	0.0013650642293932048	0.0023695516772315856	2.2102259906072717
GBRR3_HUMAN	111320	Nephrogenic anaemia	527	25	3.3905047091853084e-06	8.298486757249935e-06	2.9884280699694927
GBRR3_HUMAN	111320	Nephrosclerosis	584	42	4.062902554338779e-15	1.8126621204563198e-14	4.6500381865119405
GBRR3_HUMAN	111320	Nerve injury	4500	158	7.475004127168722e-18	3.7589730973236925e-17	2.1836035080396163
GBRR3_HUMAN	111320	Nervousness	25922	847	1.5945285911828935e-74	2.5095029131610477e-73	2.026977762365079
GBRR3_HUMAN	111320	Neuralgia	7675	301	7.586616707887311e-41	7.173341606117951e-40	2.449457326978738
GBRR3_HUMAN	111320	Neuritis	677	25	0.0002096435485222624	0.000413752463996556	2.3009062747311124
GBRR3_HUMAN	111320	Neurogenic bladder	1060	60	4.923812835858718e-16	2.2920307478254443e-15	3.600458138699245
GBRR3_HUMAN	111320	Neuroleptic malignant syndrome	5286	635	0.0	0.0	8.1928292054541
GBRR3_HUMAN	111320	Neurological decompensation	774	40	4.5650999502553536e-10	1.5337818578710115e-09	3.270170879835827
GBRR3_HUMAN	111320	Neurological symptom	2400	84	3.1375332949752203e-10	1.065876288928632e-09	2.17644274360058
GBRR3_HUMAN	111320	Neutrophil count increased	4637	251	6.287203256875484e-58	7.943596045990453e-57	3.4340894999753404
GBRR3_HUMAN	111320	Neutrophil percentage increased	862	65	1.3741474850523865e-23	8.463157757271719e-23	4.893972794133228
GBRR3_HUMAN	111320	Neutrophilia	890	47	7.156232497233892e-12	2.686241521760067e-11	3.345621441654103
GBRR3_HUMAN	111320	Nightmare	16080	679	1.236102212137659e-103	2.604208402070188e-102	2.6456194145150613
GBRR3_HUMAN	111320	Nocturia	4170	164	4.323510065505542e-23	2.6210926315275655e-22	2.456628119265586
GBRR3_HUMAN	111320	Nocturnal dyspnoea	506	23	1.6019797003433852e-05	3.645276043297081e-05	2.8575064592851156
GBRR3_HUMAN	111320	Nodal arrhythmia	552	31	5.761426806112856e-09	1.7924150339397162e-08	3.570511909778522
GBRR3_HUMAN	111320	Nodal rhythm	884	68	4.382709249980265e-25	2.8275461753325647e-24	5.000636303748952
GBRR3_HUMAN	111320	Non-cardiac chest pain	1974	75	7.169282663200296e-11	2.5338538683922586e-10	2.3699698122032946
GBRR3_HUMAN	111320	Normochromic normocytic anaemia	1838	82	2.3943540603022497e-15	1.0799318143289356e-14	2.802178885472078
GBRR3_HUMAN	111320	Nuclear magnetic resonance imaging brain abnormal	1464	56	1.3168434463197069e-08	3.986014201120234e-08	2.3866673267892726
GBRR3_HUMAN	111320	Nystagmus	2640	269	3.62052816388811e-122	8.922774272366832e-121	6.808120619359602
GBRR3_HUMAN	111320	Obesity	5409	329	1.0014235276228505e-87	1.8130957086772024e-86	3.88632128488206
GBRR3_HUMAN	111320	Obsessive thoughts	975	60	1.1087735249226881e-17	5.5365789938266753e-17	3.9349269275401584
GBRR3_HUMAN	111320	Obsessive-compulsive disorder	3602	158	3.249750888827832e-27	2.2315686671595264e-26	2.752963540042977
GBRR3_HUMAN	111320	Obstructive airways disorder	2705	161	9.688413910603193e-43	9.508563648326045e-42	3.7976530419980246
GBRR3_HUMAN	111320	Occult blood positive	1488	60	5.819052974522735e-10	1.9410733919967456e-09	2.521329228780984
GBRR3_HUMAN	111320	Oculogyric crisis	803	62	4.1856239702909427e-23	2.538745257944992e-22	5.020881794857247
GBRR3_HUMAN	111320	Oedema mucosal	549	31	5.0782179083181225e-09	1.5862220830787693e-08	3.591190550182645
GBRR3_HUMAN	111320	Oesophageal candidiasis	1446	51	7.041655300751646e-07	1.844330949549639e-06	2.1938275397092175
GBRR3_HUMAN	111320	Oesophageal haemorrhage	591	21	0.001598610426262393	0.0027400835478605845	2.2108076290258523
GBRR3_HUMAN	111320	Oesophageal ulcer	2038	66	4.514756933019118e-07	1.2035126849192476e-06	2.008369144304853
GBRR3_HUMAN	111320	Oesophagitis	5289	188	1.4309098143642432e-21	8.246420321176505e-21	2.2116125272020457
GBRR3_HUMAN	111320	Oliguria	2981	148	5.762036659436509e-31	4.3812684026222305e-30	3.1348853072566674
GBRR3_HUMAN	111320	Onychomycosis	1513	66	2.989858020233236e-12	1.1480933555610872e-11	2.7370448877464897
GBRR3_HUMAN	111320	Open wound	1299	50	6.970309194228381e-08	1.992212644507809e-07	2.4022272075655495
GBRR3_HUMAN	111320	Operative haemorrhage	539	38	1.4565297869642683e-13	6.00993325170477e-13	4.551477354310423
GBRR3_HUMAN	111320	Ophthalmoplegia	650	25	0.00012721751764404397	0.0002590769625208285	2.400305425799497
GBRR3_HUMAN	111320	Oral candidiasis	4792	162	8.692157088481155e-17	4.1814535778006046e-16	2.099619216952044
GBRR3_HUMAN	111320	Oral disorder	3499	123	3.10627213266083e-14	1.3277322310530175e-13	2.186297151757539
GBRR3_HUMAN	111320	Oral fungal infection	1210	49	1.9238558176305986e-08	5.749535952135398e-08	2.5326220039658773
GBRR3_HUMAN	111320	Oral mucosa erosion	522	37	2.562354385140404e-13	1.0437016529468693e-12	4.577902100751618
GBRR3_HUMAN	111320	Oral surgery	848	28	0.0006008779019725999	0.0011058051316191859	2.0490412171459123
GBRR3_HUMAN	111320	Orthopnoea	1544	93	8.258347712111553e-26	5.441539187401409e-25	3.846113104744197
GBRR3_HUMAN	111320	Orthostatic hypotension	6684	327	9.83602553914544e-65	1.367101221753252e-63	3.0867542639469696
GBRR3_HUMAN	111320	Osteitis	1366	67	1.0356175920814065e-14	4.528134994543196e-14	3.0950820540524693
GBRR3_HUMAN	111320	Osteoarthritis	16173	649	3.213660612964512e-90	5.96203326838668e-89	2.5086933479513553
GBRR3_HUMAN	111320	Osteolysis	1028	86	6.7713762564085734e-34	5.518713591631795e-33	5.478404103470189
GBRR3_HUMAN	111320	Osteopenia	5093	227	2.4714871099933637e-39	2.2684305188127139e-38	2.7993697680666147
GBRR3_HUMAN	111320	Osteoporosis	13574	477	1.159623697778046e-50	1.3091925346137074e-49	2.185511353948156
GBRR3_HUMAN	111320	Osteoporotic fracture	556	18	0.006649889835781644	0.01010001527333968	2.0076904119140773
GBRR3_HUMAN	111320	Osteosclerosis	810	78	4.944965136593305e-35	4.136085750913536e-34	6.394256257252759
GBRR3_HUMAN	111320	Otitis externa	525	32	4.5406698662476225e-10	1.5257609400015396e-09	3.895018946530624
GBRR3_HUMAN	111320	Overdose	62475	3635	0.0	0.0	3.707133847204781
GBRR3_HUMAN	111320	Overweight	1478	61	1.9174123586034244e-10	6.602203928588172e-10	2.5832503700382725
GBRR3_HUMAN	111320	Oxygen saturation abnormal	523	31	1.6305683744465618e-09	5.280027591637379e-09	3.7809689125906707
GBRR3_HUMAN	111320	Oxygen saturation decreased	15446	878	1.0658898340423338e-211	4.479854785682524e-210	3.6166051686092087
GBRR3_HUMAN	111320	PCO2 decreased	860	60	2.9631154716696243e-20	1.6317971559948243e-19	4.500572673374056
GBRR3_HUMAN	111320	PCO2 increased	555	37	1.5823104281929981e-12	6.172785362350973e-12	4.286259688927673
GBRR3_HUMAN	111320	PO2 decreased	1049	80	5.851337987062e-29	4.21961592831867e-28	4.954190765324039
GBRR3_HUMAN	111320	Palatal oedema	514	23	2.0457857815191646e-05	4.6000626315342003e-05	2.8109483092356635
GBRR3_HUMAN	111320	Pallor	10990	372	1.4666253372967183e-36	1.2692591381155068e-35	2.1023583028758073
GBRR3_HUMAN	111320	Pancreatic disorder	1871	70	7.40270615873614e-10	2.4526462116893606e-09	2.332334533675247
GBRR3_HUMAN	111320	Pancreatitis acute	9139	328	4.403404221849163e-37	3.855861634642699e-36	2.2338559177795796
GBRR3_HUMAN	111320	Pancreatitis chronic	1100	53	1.0835649376305651e-11	4.0248683862105625e-11	3.0376358062887614
GBRR3_HUMAN	111320	Panic attack	15689	788	1.1982634466253203e-159	3.83196884026621e-158	3.1733452042312655
GBRR3_HUMAN	111320	Panic disorder	1788	121	8.366238005220575e-38	7.4372014148246985e-37	4.35568321118385
GBRR3_HUMAN	111320	Panic reaction	3218	155	6.158170031232286e-31	4.677598775291671e-30	3.036625375440108
GBRR3_HUMAN	111320	Paradoxical drug reaction	936	110	2.892528399139142e-57	3.6209126926612654e-56	7.9913316234244745
GBRR3_HUMAN	111320	Paralysis	6374	233	5.773650517095245e-28	4.051733019403226e-27	2.2767919077156926
GBRR3_HUMAN	111320	Paranoia	8567	398	2.6671479942333895e-72	4.084550661299966e-71	2.923618433921532
GBRR3_HUMAN	111320	Paraparesis	776	28	0.00016171921414583052	0.00032439889478047594	2.2462751310957856
GBRR3_HUMAN	111320	Paraplegia	1214	41	2.1960968883571707e-05	4.920256541967142e-05	2.0974535903192533
GBRR3_HUMAN	111320	Paresis	1104	39	1.3322709128926055e-05	3.0598002296531964e-05	2.197462713760103
GBRR3_HUMAN	111320	Parkinsonism	3775	274	6.1604932449239e-90	1.1395259601860382e-88	4.696398790838775
GBRR3_HUMAN	111320	Parotitis	557	20	0.0012232631977639303	0.0021382268766008483	2.2349212530721574
GBRR3_HUMAN	111320	Partial seizures	1861	82	4.678306265626854e-15	2.0807408060188672e-14	2.765950603085424
GBRR3_HUMAN	111320	Partner stress	798	42	9.869506785897461e-11	3.459398182959186e-10	3.3337575358326346
GBRR3_HUMAN	111320	Patent ductus arteriosus	2340	84	9.6821254481218e-11	3.3952680572746244e-10	2.234326859121872
GBRR3_HUMAN	111320	Pathological fracture	2308	99	7.126648055683718e-17	3.441059224014218e-16	2.6893417514050495
GBRR3_HUMAN	111320	Pathological gambling	1745	77	2.853219656289073e-14	1.2215875939735667e-13	2.7701366574724413
GBRR3_HUMAN	111320	Peptic ulcer	1748	83	5.070609818414503e-17	2.4639100272218224e-16	2.991371626747121
GBRR3_HUMAN	111320	Pericardial haemorrhage	923	33	4.343042302638398e-05	9.390206974711911e-05	2.2250022205444773
GBRR3_HUMAN	111320	Periodontal disease	954	40	1.3534953236117514e-07	3.7771628523213054e-07	2.6261547328222066
GBRR3_HUMAN	111320	Periodontitis	1111	47	8.97081484204091e-09	2.7512343992496902e-08	2.650713228678956
GBRR3_HUMAN	111320	Peripheral arterial occlusive disease	1972	71	2.3470548317640353e-09	7.515700932736265e-09	2.2412110104124707
GBRR3_HUMAN	111320	Peripheral ischaemia	1855	100	4.86590147468584e-24	3.040125173940436e-23	3.4192384982898814
GBRR3_HUMAN	111320	Peripheral motor neuropathy	570	20	0.0023228660005771007	0.0038677701205609336	2.182095841635906
GBRR3_HUMAN	111320	Peripheral vascular disorder	3205	124	1.9935856753099192e-17	9.850023475417988e-17	2.4151076987920934
GBRR3_HUMAN	111320	Peritoneal haemorrhage	908	30	0.0005396439107781457	0.0010013152207028883	2.050374794247862
GBRR3_HUMAN	111320	Persecutory delusion	985	117	2.7058703068915372e-61	3.590303557761328e-60	8.088586832331254
GBRR3_HUMAN	111320	Personality change	4692	182	5.917008929145256e-25	3.802916950755006e-24	2.421594165717896
GBRR3_HUMAN	111320	Personality disorder	1190	87	4.968031733522763e-30	3.685615294696063e-29	4.73314986501714
GBRR3_HUMAN	111320	Petit mal epilepsy	2205	100	8.119079934022121e-19	4.240170817984532e-18	2.8507190330160292
GBRR3_HUMAN	111320	Pharyngeal erythema	1058	44	6.747756568227816e-08	1.9307541658914636e-07	2.603881625620756
GBRR3_HUMAN	111320	Phlebitis	2796	117	4.584314913458048e-19	2.4171096624103003e-18	2.620714210699339
GBRR3_HUMAN	111320	Phobia	734	33	3.4800469689155123e-07	9.369780903233553e-07	2.8248958292219473
GBRR3_HUMAN	111320	Physical assault	1321	98	4.1111379339965255e-34	3.366816436106158e-33	4.8084614008248305
GBRR3_HUMAN	111320	Plantar fasciitis	1300	51	3.4886835030678194e-08	1.0214261703656992e-07	2.45027175171686
GBRR3_HUMAN	111320	Plasmacytoma	798	30	3.7121580338357644e-05	8.094503691833183e-05	2.344048267382321
GBRR3_HUMAN	111320	Platelet count increased	4925	187	1.5285336623831436e-24	9.699684838753996e-24	2.368389165388909
GBRR3_HUMAN	111320	Pleural effusion	26820	914	4.9210117329070004e-89	9.021072831825176e-88	2.117153515769262
GBRR3_HUMAN	111320	Pleural fibrosis	768	66	4.490837645855151e-27	3.069670045167671e-26	5.641743522178305
GBRR3_HUMAN	111320	Pleuritic pain	1641	58	1.4461075806089256e-07	4.0257391443322527e-07	2.1986373135876627
GBRR3_HUMAN	111320	Pneumonia aspiration	9035	766	4.1848521049896245e-291	2.4702310465693547e-289	5.558815927447136
GBRR3_HUMAN	111320	Pneumonia klebsiella	641	31	1.6387074449200411e-07	4.539394368269362e-07	3.049568368843623
GBRR3_HUMAN	111320	Pneumonia staphylococcal	1054	51	2.2428715576788636e-11	8.180221861861375e-11	3.051235710762072
GBRR3_HUMAN	111320	Pneumothorax	5707	216	7.506977932879453e-28	5.24918591567657e-27	2.3605261881838073
GBRR3_HUMAN	111320	Poisoning	7268	1043	0.0	0.0	10.054291402043676
GBRR3_HUMAN	111320	Poisoning deliberate	1072	179	3.1937466205233654e-118	7.601535780253261e-117	12.028406249107222
GBRR3_HUMAN	111320	Polydipsia	1946	146	1.6168819225007266e-50	1.821715456868307e-49	4.867286002315646
GBRR3_HUMAN	111320	Polyneuropathy	3193	112	4.4648727169624285e-13	1.7953165718463377e-12	2.1813875989089877
GBRR3_HUMAN	111320	Polyuria	3109	147	1.2596617616363918e-28	9.002237454255606e-28	2.97809670486602
GBRR3_HUMAN	111320	Poor quality sleep	7082	263	2.241705680672841e-32	1.7636660231977903e-31	2.3144168022630436
GBRR3_HUMAN	111320	Post herpetic neuralgia	556	26	2.8333490363815198e-06	6.9895549647577375e-06	2.943770805225798
GBRR3_HUMAN	111320	Post procedural complication	11382	518	1.9000374483407334e-90	3.53241330458033e-89	2.861188812969761
GBRR3_HUMAN	111320	Post procedural haematoma	898	51	6.275467976955895e-14	2.640553509316049e-13	3.6132106468646494
GBRR3_HUMAN	111320	Post-traumatic stress disorder	1994	158	1.2762432448234426e-57	1.605751114945771e-56	5.164055790799571
GBRR3_HUMAN	111320	Postictal state	632	22	0.001314026367589883	0.0022864307221297387	2.1642098101470877
GBRR3_HUMAN	111320	Postnasal drip	621	23	0.00036460946394581547	0.0006947009287696553	2.30798598634567
GBRR3_HUMAN	111320	Postoperative wound complication	608	20	0.0035464311737572105	0.005700850220577341	2.041076042346511
GBRR3_HUMAN	111320	Posture abnormal	1500	78	3.005418284037622e-18	1.5354872339374053e-17	3.2915580733537406
GBRR3_HUMAN	111320	Potentiating drug interaction	1312	110	6.03550726069589e-43	5.947940594560497e-42	5.491547355198516
GBRR3_HUMAN	111320	Pre-existing condition improved	1868	69	1.3956447874869217e-09	4.5393335498197646e-09	2.301571350474782
GBRR3_HUMAN	111320	Primary sequestrum	923	66	1.1100198329411932e-22	6.639158185977069e-22	4.62135817102587
GBRR3_HUMAN	111320	Procedural complication	5572	277	1.850620872010773e-56	2.2892721135910515e-55	3.1392096456395686
GBRR3_HUMAN	111320	Procedural hypotension	578	66	2.615263353780617e-34	2.150665458518748e-33	7.735359282361661
GBRR3_HUMAN	111320	Prostatitis	1361	50	2.831242114098175e-07	7.681081029273973e-07	2.2886207339812135
GBRR3_HUMAN	111320	Prostatomegaly	1495	51	1.8816170036188027e-06	4.7267400765058185e-06	2.119383253389445
GBRR3_HUMAN	111320	Protein total decreased	2029	101	8.993428742709888e-22	5.21871762786312e-21	3.143553527045503
GBRR3_HUMAN	111320	Protein total increased	989	50	7.513298550356792e-12	2.816800514081891e-11	3.195294762778883
GBRR3_HUMAN	111320	Prothrombin level decreased	703	35	1.3476659687162433e-08	4.076281642076192e-08	3.1441126460697006
GBRR3_HUMAN	111320	Prothrombin time prolonged	4742	195	1.1243840091529175e-29	8.263296929406734e-29	2.573452595287563
GBRR3_HUMAN	111320	Prothrombin time shortened	872	36	7.867228830769608e-07	2.0514201004343513e-06	2.5840608650951524
GBRR3_HUMAN	111320	Prurigo	651	32	7.279058968148169e-08	2.0769091826544665e-07	3.1021717942481386
GBRR3_HUMAN	111320	Pseudomonal sepsis	686	35	7.333354142839089e-09	2.263474128874438e-08	3.226216970160614
GBRR3_HUMAN	111320	Pseudomonas infection	3050	104	1.545698191383257e-11	5.691543438561869e-11	2.118395827250065
GBRR3_HUMAN	111320	Psychiatric decompensation	577	27	1.8260323835806227e-06	4.593197363647245e-06	2.9458293862084735
GBRR3_HUMAN	111320	Psychiatric symptom	3424	221	6.0607030484662604e-64	8.333686221407191e-63	4.14039571574843
GBRR3_HUMAN	111320	Psychomotor hyperactivity	8184	366	1.2630009544678127e-62	1.7075812228142007e-61	2.8092599956594264
GBRR3_HUMAN	111320	Psychomotor retardation	1086	116	6.869998141694221e-56	8.423558127770672e-55	7.17617086063767
GBRR3_HUMAN	111320	Psychomotor skills impaired	930	98	5.596923361177707e-47	5.9422056227568684e-46	7.068207083183614
GBRR3_HUMAN	111320	Psychotic behaviour	547	31	4.665846801612139e-09	1.4612372023033124e-08	3.6051098934004067
GBRR3_HUMAN	111320	Psychotic disorder	13887	774	6.332960228378766e-182	2.2907334779619346e-180	3.541974375750802
GBRR3_HUMAN	111320	Pulmonary alveolar haemorrhage	1751	59	4.272153892616849e-07	1.1414977187209908e-06	2.092464836320483
GBRR3_HUMAN	111320	Pulmonary arterial pressure increased	608	22	0.0006381688295087931	0.0011700503875755894	2.2528463894022583
GBRR3_HUMAN	111320	Pulmonary congestion	5773	426	2.961278431096895e-141	8.398563532811025e-140	4.780858946094004
GBRR3_HUMAN	111320	Pulmonary granuloma	630	40	9.523232630365823e-13	3.7604522263299314e-12	4.068314281016097
GBRR3_HUMAN	111320	Pulmonary hypertension	9438	350	2.766239264705853e-42	2.690481997122412e-41	2.311033503052993
GBRR3_HUMAN	111320	Pulmonary infarction	1679	78	1.3552942071819372e-15	6.1809089326876506e-15	2.923545022054353
GBRR3_HUMAN	111320	Pulmonary mass	3999	150	1.4999392850085814e-19	8.050981289758922e-19	2.3385672503892216
GBRR3_HUMAN	111320	Pulmonary oedema	19496	979	6.471010320015728e-198	2.5482489601960424e-196	3.17262382116124
GBRR3_HUMAN	111320	Pulmonary valve incompetence	736	45	1.429777012908213e-13	5.901972228847477e-13	3.907877864000628
GBRR3_HUMAN	111320	Pulse abnormal	905	40	3.42206384970228e-08	1.0026566219352544e-07	2.7749195673982627
GBRR3_HUMAN	111320	Pulse absent	2857	164	1.4409397142670292e-41	1.3819212949483719e-40	3.6543825643438312
GBRR3_HUMAN	111320	Pulse pressure decreased	508	27	1.5902929967458714e-07	4.4101376994129397e-07	3.368411980072059
GBRR3_HUMAN	111320	Pupil fixed	1174	75	1.2661663448583965e-22	7.558372502803728e-22	4.095152569039178
GBRR3_HUMAN	111320	Pupillary reflex impaired	1097	86	7.443411970212982e-32	5.781323064927433e-31	5.104507087506349
GBRR3_HUMAN	111320	Pupils unequal	706	59	8.999980783823874e-24	5.575566412607107e-23	5.472102786791743
GBRR3_HUMAN	111320	Purpura	4366	148	1.3174471828480632e-15	6.012335205531469e-15	2.1055310752627165
GBRR3_HUMAN	111320	Purulent discharge	2253	80	4.2111113839925106e-10	1.4181718299078888e-09	2.209208859456509
GBRR3_HUMAN	111320	Pyelonephritis	3206	117	9.709775792902943e-15	4.251462503006507e-14	2.272869333267572
GBRR3_HUMAN	111320	Pyelonephritis acute	757	41	6.940921717418863e-11	2.4555151739960647e-10	3.436191426598442
GBRR3_HUMAN	111320	QRS axis abnormal	503	32	1.567247846632089e-10	5.424807104291702e-10	4.07695189095456
GBRR3_HUMAN	111320	Quadriparesis	578	44	1.1854344580880375e-16	5.670056541373398e-16	4.944449378987728
GBRR3_HUMAN	111320	Quadriplegia	953	47	7.047739907998525e-11	2.4922174770044703e-10	3.1129788910755067
GBRR3_HUMAN	111320	Radiculopathy	1052	87	6.698024072352942e-34	5.4594139110938225e-33	5.410014819807157
GBRR3_HUMAN	111320	Radiotherapy	661	23	0.0009835127029305217	0.0017486799121370295	2.163284670587321
GBRR3_HUMAN	111320	Radius fracture	1211	46	3.210825009948795e-07	8.669303248769382e-07	2.3694002057248253
GBRR3_HUMAN	111320	Rales	2666	158	9.342768400068705e-42	8.994139822267492e-41	3.7803853396762412
GBRR3_HUMAN	111320	Rash maculo-papular	7867	293	5.407803728685546e-36	4.6222967985606755e-35	2.3213938795855973
GBRR3_HUMAN	111320	Reading disorder	900	31	0.00017275970393325444	0.0003452379221799048	2.1406636421111735
GBRR3_HUMAN	111320	Rectal polyp	559	22	0.00028972684749406795	0.000560385550459619	2.458413378379373
GBRR3_HUMAN	111320	Red blood cell count decreased	10715	369	6.488999630098228e-38	5.78068990083941e-37	2.140229804078906
GBRR3_HUMAN	111320	Red blood cell count increased	843	35	9.760139371220927e-07	2.5223437471780234e-06	2.5993406529388117
GBRR3_HUMAN	111320	Red cell distribution width increased	825	28	0.0004619992802823004	0.000866119280602601	2.1081728959343136
GBRR3_HUMAN	111320	Reflux oesophagitis	904	61	7.394266325078551e-20	4.015892270672737e-19	4.3421895306574525
GBRR3_HUMAN	111320	Refusal of treatment by patient	4321	202	5.518925397806929e-38	4.925160688758618e-37	2.9428362224538622
GBRR3_HUMAN	111320	Regurgitation	1627	54	2.0377532531389993e-06	5.101052670469947e-06	2.0600205497961355
GBRR3_HUMAN	111320	Renal artery stenosis	740	25	0.0011453583394547763	0.0020123988437052783	2.0981690784960634
GBRR3_HUMAN	111320	Renal atrophy	578	21	0.0008126184778792825	0.001463458822056597	2.262406370816402
GBRR3_HUMAN	111320	Renal cyst	3681	209	9.998890714213283e-52	1.14794224371806e-50	3.612210786233402
GBRR3_HUMAN	111320	Renal failure	53693	2574	0.0	0.0	3.0215703388211352
GBRR3_HUMAN	111320	Renal failure acute	58442	2293	3.9211919109638494e-302	2.4104605397732142e-300	2.4505780785758637
GBRR3_HUMAN	111320	Renal failure chronic	10708	399	1.897433835188919e-48	2.0686737637240312e-47	2.3225382309001827
GBRR3_HUMAN	111320	Renal impairment	25871	1233	1.1812455309461808e-229	5.386300322502801e-228	3.003060912016783
GBRR3_HUMAN	111320	Renal infarct	599	24	7.76069759911254e-05	0.00016252717951519238	2.50466653126904
GBRR3_HUMAN	111320	Renal injury	4275	764	0.0	0.0	13.057770900817543
GBRR3_HUMAN	111320	Renal mass	744	27	0.00020908581742193246	0.00041270154076182184	2.2597017606899032
GBRR3_HUMAN	111320	Renal tubular disorder	1630	62	3.4565810712274038e-09	1.0930241554475505e-08	2.372750899227819
GBRR3_HUMAN	111320	Renal tubular necrosis	3867	166	1.8677065201219495e-27	1.2913599159716919e-26	2.691507029740047
GBRR3_HUMAN	111320	Resorption bone increased	764	35	1.0102843013365817e-07	2.849780231502034e-07	2.8810250309664744
GBRR3_HUMAN	111320	Respiration abnormal	1241	48	1.1934395855676092e-07	3.3458999284929755e-07	2.414389363754733
GBRR3_HUMAN	111320	Respiratory acidosis	1523	207	2.199671188504929e-118	5.2459751778329915e-117	9.438891017106684
GBRR3_HUMAN	111320	Respiratory alkalosis	652	37	1.5718707779956298e-10	5.440214321699028e-10	3.6102154778285116
GBRR3_HUMAN	111320	Respiratory arrest	17557	1626	0.0	0.0	6.124688692407856
GBRR3_HUMAN	111320	Respiratory depression	4822	699	0.0	0.0	10.173499227709486
GBRR3_HUMAN	111320	Respiratory disorder neonatal	602	28	1.3386067055605584e-06	3.4141275855819384e-06	2.9272017387798743
GBRR3_HUMAN	111320	Respiratory distress	12346	573	4.160125446896393e-103	8.724081550092253e-102	2.9206128620213874
GBRR3_HUMAN	111320	Respiratory failure	31725	1367	8.279277919056344e-215	3.5366089488293946e-213	2.7021028370346474
GBRR3_HUMAN	111320	Respiratory rate decreased	1520	112	1.8474398292913834e-38	1.6649482864448648e-37	4.773334653578545
GBRR3_HUMAN	111320	Respiratory rate increased	4152	170	6.903452649889551e-26	4.559835119362583e-25	2.5618528527493374
GBRR3_HUMAN	111320	Restless legs syndrome	7493	285	1.5679318883348915e-36	1.3559487684467786e-35	2.372665948782105
GBRR3_HUMAN	111320	Restlessness	15739	899	3.9409872270473147e-218	1.7115014727502507e-216	3.6352334531565833
GBRR3_HUMAN	111320	Resuscitation	1044	46	3.7763450403152405e-09	1.1907732421591906e-08	2.765883005680783
GBRR3_HUMAN	111320	Retroperitoneal haematoma	1012	35	5.453197634494533e-05	0.00011645475905319503	2.149710591171505
GBRR3_HUMAN	111320	Rhabdomyolysis	19082	1102	5.058255480719172e-271	2.7552434052488813e-269	3.6778873459831
GBRR3_HUMAN	111320	Rhinitis	2829	117	1.303875943367045e-18	6.7563820283459086e-18	2.5888249891089705
GBRR3_HUMAN	111320	Rhinitis allergic	1787	84	5.898949522962256e-17	2.858442523396109e-16	2.95985989088605
GBRR3_HUMAN	111320	Rhonchi	725	66	1.6876654170670199e-28	1.2019806131541695e-27	6.009869427267329
GBRR3_HUMAN	111320	Rib fracture	7820	325	4.33425214005933e-49	4.773721133655347e-48	2.6020655883416826
GBRR3_HUMAN	111320	Road traffic accident	18176	663	7.588155745370514e-76	1.2119833614703537e-74	2.2717445573360737
GBRR3_HUMAN	111320	Rotator cuff syndrome	5943	202	6.3980563333515896e-21	3.606719934750367e-20	2.1113991291216614
GBRR3_HUMAN	111320	Salivary hypersecretion	3848	324	2.3502654386080384e-123	5.850532622935316e-122	5.517160598460819
GBRR3_HUMAN	111320	Schizoaffective disorder	610	46	3.520353051707521e-17	1.722049964081741e-16	4.89423978664791
GBRR3_HUMAN	111320	Schizophrenia	3474	235	1.2227197107103636e-71	1.858165633165581e-70	4.353749421602978
GBRR3_HUMAN	111320	Sciatica	4713	156	1.5666395067799856e-15	7.125401787030958e-15	2.054244274877779
GBRR3_HUMAN	111320	Scoliosis	2651	148	2.2854631650507152e-36	1.9693974151688404e-35	3.5481941971466795
GBRR3_HUMAN	111320	Screaming	3243	150	3.3030962102451753e-28	2.333286021226649e-27	2.910166617118692
GBRR3_HUMAN	111320	Seborrhoeic dermatitis	565	24	3.146063853374118e-05	6.918103401599036e-05	2.662076257818296
GBRR3_HUMAN	111320	Seborrhoeic keratosis	609	44	7.834273474541802e-16	3.61466405319745e-15	4.673161005981322
GBRR3_HUMAN	111320	Sedation	9553	827	1.4185e-320	9.30177e-319	5.687177937016342
GBRR3_HUMAN	111320	Self esteem decreased	882	45	5.966356613859071e-11	2.1197795175750335e-10	3.2262169701606145
GBRR3_HUMAN	111320	Self injurious behaviour	3286	322	5.292100045028767e-141	1.49809901026157e-139	6.519048136871103
GBRR3_HUMAN	111320	Self-injurious ideation	1931	124	1.782582011399695e-36	1.5397788099956838e-35	4.117845500818174
GBRR3_HUMAN	111320	Self-medication	2421	154	2.2911593669824986e-44	2.321004480736426e-43	4.076389893836817
GBRR3_HUMAN	111320	Sensory disturbance	7653	263	2.2247184190123213e-27	1.534842918822166e-26	2.1355897394630166
GBRR3_HUMAN	111320	Sensory loss	3575	149	1.3237673945165577e-23	8.156839162816921e-23	2.609789174285793
GBRR3_HUMAN	111320	Septic shock	15011	586	2.6990781390397767e-77	4.3828640454189206e-76	2.437745198472279
GBRR3_HUMAN	111320	Sequestrectomy	688	30	2.1180538776181528e-06	5.293818502801478e-06	2.7359104397410676
GBRR3_HUMAN	111320	Seroma	677	24	0.0006320962337829724	0.001159589797669164	2.2054873743946373
GBRR3_HUMAN	111320	Serotonin syndrome	6935	751	0.0	0.0	7.287473216265451
GBRR3_HUMAN	111320	Shock	10168	511	3.064939259493759e-104	6.489417579251257e-103	3.175303076999956
GBRR3_HUMAN	111320	Shock haemorrhagic	2538	104	1.7653094231294674e-16	8.381963736171183e-16	2.5640074392270713
GBRR3_HUMAN	111320	Sick sinus syndrome	1271	47	6.258719084161405e-07	1.6467802863475363e-06	2.3042147674137325
GBRR3_HUMAN	111320	Sinus arrest	738	34	1.3357552730876663e-07	3.729165240978049e-07	2.8980960396726885
GBRR3_HUMAN	111320	Sinus arrhythmia	818	42	2.083635924733734e-10	7.158827379020595e-10	3.2478359498575666
GBRR3_HUMAN	111320	Sinus bradycardia	4505	276	1.4622139200109686e-74	2.302121037730374e-73	3.91631767273978
GBRR3_HUMAN	111320	Sinus tachycardia	6833	428	9.877805951783175e-118	2.342686899799324e-116	4.009877916636162
GBRR3_HUMAN	111320	Skeletal injury	1216	48	5.2841624075675416e-08	1.525279148337152e-07	2.4660672182871544
GBRR3_HUMAN	111320	Skin erosion	778	45	9.5506585000326e-13	3.771046895866683e-12	3.683961260606322
GBRR3_HUMAN	111320	Skin graft	671	29	3.667758550021731e-06	8.9457662575451e-06	2.7106252861442917
GBRR3_HUMAN	111320	Skin induration	986	32	0.00036170793173439836	0.0006895911904779334	2.0128347386159304
GBRR3_HUMAN	111320	Skin laceration	2472	102	2.6234226987489265e-16	1.2363879462243754e-15	2.582607103708319
GBRR3_HUMAN	111320	Skin oedema	519	20	0.0006644994396270334	0.0012149050928806522	2.405115657113724
GBRR3_HUMAN	111320	Skin test positive	686	41	3.3906761138020667e-12	1.297660664596328e-11	3.8144388549526886
GBRR3_HUMAN	111320	Skull fracture	694	35	9.791683358701171e-09	2.993800385820914e-08	3.187051969005402
GBRR3_HUMAN	111320	Sleep apnoea syndrome	7332	339	2.1653328104968716e-61	2.8773431218384537e-60	2.9089930621551177
GBRR3_HUMAN	111320	Sleep disorder	21451	907	3.251600687820404e-138	9.029462053566012e-137	2.6492857053155956
GBRR3_HUMAN	111320	Sleep talking	757	33	6.850115248264458e-07	1.7958893740600924e-06	2.735154663376499
GBRR3_HUMAN	111320	Sluggishness	3848	125	3.6108831721029835e-12	1.3795049567040031e-11	2.014760799254211
GBRR3_HUMAN	111320	Small cell lung cancer stage unspecified	731	27	0.00011720658642302284	0.00023974117493892025	2.30142920797537
GBRR3_HUMAN	111320	Small for dates baby	3930	270	1.8080287983889484e-83	3.1418303268094154e-82	4.4267927934826785
GBRR3_HUMAN	111320	Snoring	1466	117	1.8837485759045334e-43	1.8742924016348604e-42	5.204516953642349
GBRR3_HUMAN	111320	Social avoidant behaviour	2987	163	1.0946861777017035e-38	9.915591207838236e-38	3.463613530500336
GBRR3_HUMAN	111320	Soft tissue disorder	624	36	1.7603317409575936e-10	6.073687348374126e-10	3.6739368762237197
GBRR3_HUMAN	111320	Somnambulism	3746	200	1.1256536664435859e-45	1.1683248912171457e-44	3.384525417088969
GBRR3_HUMAN	111320	Somnolence	76574	3638	0.0	0.0	2.9931416375516102
GBRR3_HUMAN	111320	Sopor	3766	706	0.0	0.0	13.84489894292847
GBRR3_HUMAN	111320	Speech disorder	22697	843	9.763023437487544e-100	1.989431070448398e-98	2.3147449825535094
GBRR3_HUMAN	111320	Spinal column stenosis	3706	131	2.607291590808632e-15	1.174072181613254e-14	2.198881194263875
GBRR3_HUMAN	111320	Spinal compression fracture	3524	148	1.1193824757823703e-23	6.913168135210212e-23	2.6306664915456572
GBRR3_HUMAN	111320	Spinal cord compression	1591	65	6.976322941905418e-11	2.467711948008581e-10	2.556026420002741
GBRR3_HUMAN	111320	Spinal cord disorder	795	26	0.0010975622967928362	0.0019353308311403218	2.028866744824022
GBRR3_HUMAN	111320	Spinal deformity	811	38	1.656721642330229e-08	4.97679473237032e-08	2.949922580219304
GBRR3_HUMAN	111320	Spinal disorder	4142	162	1.091051886331709e-22	6.527634341405055e-22	2.442521852886423
GBRR3_HUMAN	111320	Spinal laminectomy	553	18	0.006404992036547688	0.009764294950727698	2.018948488990231
GBRR3_HUMAN	111320	Spinal osteoarthritis	4746	326	2.3111274257409167e-100	4.734460095219237e-99	4.425902538521697
GBRR3_HUMAN	111320	Spleen disorder	773	34	3.8434539540876645e-07	1.031038445645827e-06	2.7608384464540903
GBRR3_HUMAN	111320	Spondylolisthesis	1052	58	4.5962439008294904e-15	2.0451576689541472e-14	3.5014515768704935
GBRR3_HUMAN	111320	Sputum culture positive	738	53	1.2659300920105644e-18	6.563647263199446e-18	4.642926553553772
GBRR3_HUMAN	111320	Staphylococcal sepsis	2642	103	6.514238345436319e-15	2.8779027357164584e-14	2.434338901706855
GBRR3_HUMAN	111320	Staring	1287	55	3.709581495528999e-10	1.253958498732378e-09	2.678912305579795
GBRR3_HUMAN	111320	Status epilepticus	4223	381	1.606676025741204e-154	4.981223677357334e-153	5.950783232883969
GBRR3_HUMAN	111320	Strabismus	1337	110	3.502818473660763e-42	3.400885240124741e-41	5.379657637284936
GBRR3_HUMAN	111320	Streptococcal infection	2277	78	4.113912628706082e-09	1.2937396202806e-08	2.128510950572542
GBRR3_HUMAN	111320	Streptococcal sepsis	556	19	0.003590789268392753	0.0057665409892131226	2.123175190418549
GBRR3_HUMAN	111320	Stress	25226	1261	7.318273203772297e-253	3.709062191503834e-251	3.1575058855968763
GBRR3_HUMAN	111320	Stress cardiomyopathy	1382	60	3.3390257205278266e-11	1.2049116485049303e-10	2.7234932970493535
GBRR3_HUMAN	111320	Stress urinary incontinence	734	46	3.2233482475592915e-14	1.376573299061526e-13	4.012138429752066
GBRR3_HUMAN	111320	Stridor	1405	80	5.669763693246742e-21	3.202487893855297e-20	3.6231025295086745
GBRR3_HUMAN	111320	Stupor	1737	154	1.384418006012785e-62	1.870265805951949e-61	5.83776114297414
GBRR3_HUMAN	111320	Subarachnoid haemorrhage	3859	126	1.6779833034204681e-12	6.5374477240593705e-12	2.025438545745624
GBRR3_HUMAN	111320	Subcutaneous haematoma	540	25	5.1617469134540676e-06	1.2394576288916908e-05	2.912992021601331
GBRR3_HUMAN	111320	Subdural haematoma	5846	194	4.405958370457031e-19	2.3244361432007044e-18	2.0597100699093347
GBRR3_HUMAN	111320	Subileus	1053	64	1.745505556287499e-18	9.002881349951601e-18	3.8832039244481247
GBRR3_HUMAN	111320	Substance abuse	3731	329	7.154327926663745e-131	1.8854748130772572e-129	5.803207562375327
GBRR3_HUMAN	111320	Sudden death	6668	391	3.365547726474742e-99	6.821025429875764e-98	3.73792982908875
GBRR3_HUMAN	111320	Sudden onset of sleep	832	34	3.010388136333755e-06	7.404272798931263e-06	2.556716305676156
GBRR3_HUMAN	111320	Suicidal behaviour	1958	134	3.4422922715030184e-42	3.3428247104186496e-41	4.408455688831313
GBRR3_HUMAN	111320	Suicidal ideation	40687	2017	0.0	0.0	3.129956066613386
GBRR3_HUMAN	111320	Suicide attempt	25301	2293	0.0	0.0	5.980420224876398
GBRR3_HUMAN	111320	Superinfection	740	28	6.111576684849738e-05	0.00012970153835983086	2.3598508399714153
GBRR3_HUMAN	111320	Supraventricular extrasystoles	2026	94	2.059990678357739e-18	1.0593548351804218e-17	2.9196261649217483
GBRR3_HUMAN	111320	Supraventricular tachycardia	4711	205	4.094681482901201e-34	3.3536645346377546e-33	2.730041124550027
GBRR3_HUMAN	111320	Surgical procedure repeated	803	29	0.00011865021761382527	0.00024254724422038845	2.2483481055615444
GBRR3_HUMAN	111320	Synovial cyst	1764	69	1.1898446235000484e-10	4.148123263092358e-10	2.4427887076720545
GBRR3_HUMAN	111320	Systemic inflammatory response syndrome	1606	76	1.1899963037324957e-15	5.440910990193487e-15	2.9807714438032966
GBRR3_HUMAN	111320	Tachyarrhythmia	1255	58	6.306639712074446e-12	2.3749976193925264e-11	2.907638151553275
GBRR3_HUMAN	111320	Tachycardia	35142	1804	0.0	0.0	3.247158638897274
GBRR3_HUMAN	111320	Tachyphrenia	1485	83	3.365277622959227e-21	1.9161835639349175e-20	3.552520512506388
GBRR3_HUMAN	111320	Tachypnoea	4788	210	1.4370441634462297e-35	1.2170299234548507e-34	2.7526438369260284
GBRR3_HUMAN	111320	Tearfulness	2190	148	9.218319054788862e-46	9.585726636176348e-45	4.349231182888413
GBRR3_HUMAN	111320	Temporal arteritis	584	30	7.11226392440535e-08	2.0312905622495518e-07	3.249510955504734
GBRR3_HUMAN	111320	Temporomandibular joint syndrome	1437	59	4.460211476484339e-10	1.4994906464538248e-09	2.569267418762161
GBRR3_HUMAN	111320	Tenderness	4348	143	3.714761817572178e-14	1.5811889736831792e-13	2.040687728236195
GBRR3_HUMAN	111320	Tenosynovitis	884	29	0.0007477208332046484	0.001355357509159681	2.0353467060872927
GBRR3_HUMAN	111320	Tension	3013	119	2.139299778717731e-17	1.0557626604476752e-16	2.4674874366805475
GBRR3_HUMAN	111320	Tension headache	1251	53	1.0232349256106805e-09	3.3576417029037755e-09	2.6547618440603786
GBRR3_HUMAN	111320	Terminal insomnia	669	41	1.5412622655370073e-12	6.016703375052739e-12	3.9176959577141472
GBRR3_HUMAN	111320	Therapeutic agent toxicity	3743	249	2.2984084950624864e-74	3.610333862060918e-73	4.276445699943293
GBRR3_HUMAN	111320	Thinking abnormal	9279	350	7.873212217544586e-44	7.896545236910771e-43	2.352186412335715
GBRR3_HUMAN	111320	Thoracic vertebral fracture	1047	38	8.428033373832203e-06	1.9774617413385982e-05	2.259950599117465
GBRR3_HUMAN	111320	Thrombocytopenia	41520	1343	2.7169422526730726e-114	6.283020870291797e-113	2.005880346248304
GBRR3_HUMAN	111320	Thrombocytosis	1702	67	1.7662954474237522e-10	6.093683254583802e-10	2.459028494320586
GBRR3_HUMAN	111320	Thrombophlebitis	1931	84	4.451698262186812e-15	1.9820843266543895e-14	2.729096585911718
GBRR3_HUMAN	111320	Thrombophlebitis superficial	2313	84	6.783442014148979e-11	2.4012191743281516e-10	2.2613913836603605
GBRR3_HUMAN	111320	Thyroid mass	520	19	0.0013906157252567912	0.0024104836260924107	2.2757386771552115
GBRR3_HUMAN	111320	Tibia fracture	1978	67	6.657260560960839e-08	1.9058500890685254e-07	2.103878382111019
GBRR3_HUMAN	111320	Tobacco user	1303	66	3.660858623152103e-15	1.6368201917488017e-14	3.2017008509047455
GBRR3_HUMAN	111320	Tongue biting	1032	57	7.262489808535695e-15	3.201048723281499e-14	3.508138699245418
GBRR3_HUMAN	111320	Tongue coated	754	30	1.627861819094016e-05	3.701337268300823e-05	2.4865042394331804
GBRR3_HUMAN	111320	Tongue oedema	1566	59	1.092704449313862e-08	3.3286981448810674e-08	2.3493367638050815
GBRR3_HUMAN	111320	Tongue paralysis	634	37	7.212391400565568e-11	2.548673458315596e-10	3.7190661957529896
GBRR3_HUMAN	111320	Tonic clonic movements	530	46	1.5122478268745282e-19	8.115801692158577e-19	5.7032050406393004
GBRR3_HUMAN	111320	Tonic convulsion	546	51	6.65189579146543e-23	4.006802927389151e-22	6.182604884635067
GBRR3_HUMAN	111320	Tooth extraction	6320	213	1.9575802459899012e-21	1.1233184516736585e-20	2.092946846632114
GBRR3_HUMAN	111320	Tooth fracture	4257	146	9.042616673067184e-16	4.157631188439432e-15	2.1311395777592224
GBRR3_HUMAN	111320	Tooth loss	3766	165	2.7550209277500616e-28	1.950655442343551e-27	2.74958619311939
GBRR3_HUMAN	111320	Torsade de pointes	3492	198	5.1333577683515605e-49	5.645754881226803e-48	3.607016350245145
GBRR3_HUMAN	111320	Torticollis	1003	46	1.1051153771309237e-09	3.61882727177652e-09	2.884379560783094
GBRR3_HUMAN	111320	Toxic encephalopathy	1491	100	3.032414689316022e-31	2.320773522264068e-30	4.313992497842374
GBRR3_HUMAN	111320	Toxic epidermal necrolysis	6180	342	1.239976349037351e-80	2.0936382204871462e-79	3.5153496729334877
GBRR3_HUMAN	111320	Toxic skin eruption	4103	203	1.391851484261445e-41	1.3352352214590142e-40	3.1234743681878068
GBRR3_HUMAN	111320	Transaminases increased	8123	262	2.284222329519433e-23	1.396727167496972e-22	2.000000068564649
GBRR3_HUMAN	111320	Treatment noncompliance	17957	682	6.193038950489962e-85	1.091835809095868e-83	2.369042402887492
GBRR3_HUMAN	111320	Tremor	71348	2743	0.0	0.0	2.3992558060520444
GBRR3_HUMAN	111320	Tricuspid valve incompetence	4561	312	1.0902535714793714e-95	2.133008341804e-94	4.406303205751018
GBRR3_HUMAN	111320	Trismus	2293	107	6.684435764234066e-21	3.7655825223075655e-20	2.9372447456604096
GBRR3_HUMAN	111320	Troponin I increased	679	31	5.592670073327434e-07	1.478021811206778e-06	2.8707356558558796
GBRR3_HUMAN	111320	Troponin increased	2521	118	5.612405505719099e-23	3.3894617958349934e-22	2.946692054144201
GBRR3_HUMAN	111320	Type 1 diabetes mellitus	2748	142	1.6151291180660882e-31	1.243905251515405e-30	3.2697944211773655
GBRR3_HUMAN	111320	Type 2 diabetes mellitus	19197	702	1.3516691798593928e-80	2.2808583912571442e-79	2.277662082875435
GBRR3_HUMAN	111320	Unevaluable event	30206	1447	1.398057123790244e-271	7.627955083085316e-270	3.0192652309988808
GBRR3_HUMAN	111320	Unresponsive to stimuli	11760	739	8.944116947807394e-203	3.6017549458817474e-201	4.02374038123997
GBRR3_HUMAN	111320	Upper airway obstruction	670	31	4.2219304181243834e-07	1.1285720461824095e-06	2.91116855241723
GBRR3_HUMAN	111320	Upper respiratory tract inflammation	633	30	3.907886283096501e-07	1.0477046975234474e-06	2.9854545097008667
GBRR3_HUMAN	111320	Urinary hesitation	1195	67	1.6628049520190834e-17	8.241672143828105e-17	3.5642833228848914
GBRR3_HUMAN	111320	Urinary incontinence	13019	551	8.167734918169665e-85	1.438324710991401e-83	2.65192550853289
GBRR3_HUMAN	111320	Urinary retention	12827	701	1.517451476279911e-160	4.880268825773452e-159	3.469021325015354
GBRR3_HUMAN	111320	Urinary tract disorder	1661	55	2.4307596188107676e-06	6.039532445918961e-06	2.055056015239295
GBRR3_HUMAN	111320	Urinary tract infection bacterial	696	27	6.001968240417491e-05	0.00012748909431978383	2.421832828721466
GBRR3_HUMAN	111320	Urinary tract infection enterococcal	509	25	1.8454567880419331e-06	4.639616867969398e-06	3.099567956869185
GBRR3_HUMAN	111320	Urine analysis abnormal	1242	53	7.997366910687124e-10	2.6428441257909327e-09	2.6748567612988507
GBRR3_HUMAN	111320	Urine colour abnormal	615	21	0.002017312639332333	0.0033989477910948487	2.121482068257131
GBRR3_HUMAN	111320	Urine output decreased	4475	166	6.162479761787324e-21	3.4758145956726116e-20	2.3117353253812745
GBRR3_HUMAN	111320	Urosepsis	3365	122	4.9640886266462265e-15	2.205011909992639e-14	2.257456536752533
GBRR3_HUMAN	111320	Varices oesophageal	1295	44	9.309398619640792e-06	2.1742264904096664e-05	2.1105803104551932
GBRR3_HUMAN	111320	Vascular calcification	789	61	8.668571100729829e-23	5.201868511234537e-22	5.028112327395924
GBRR3_HUMAN	111320	Vascular pseudoaneurysm	736	32	1.0564552096398697e-06	2.721917803670179e-06	2.727619802044883
GBRR3_HUMAN	111320	Vascular purpura	554	34	1.1112117259401434e-10	3.881649838079687e-10	3.9235761767876394
GBRR3_HUMAN	111320	Vena cava thrombosis	901	43	1.1659246536747985e-09	3.811244665019929e-09	3.007375679177691
GBRR3_HUMAN	111320	Venous insufficiency	952	46	2.1412386460775998e-10	7.350756164288502e-10	3.046745297648368
GBRR3_HUMAN	111320	Ventricular arrhythmia	1343	103	5.5025895781887e-37	4.808110167577152e-36	4.984505218898149
GBRR3_HUMAN	111320	Ventricular dysfunction	1689	88	2.0080956148882085e-20	1.1126828612031335e-19	3.2983584864202955
GBRR3_HUMAN	111320	Ventricular extrasystoles	5825	308	2.158654328551224e-68	3.151028126805198e-67	3.350072825567542
GBRR3_HUMAN	111320	Ventricular fibrillation	5822	346	1.6175502384435712e-89	2.979962930417952e-88	3.791570842433464
GBRR3_HUMAN	111320	Ventricular hypertrophy	2536	156	3.608122371651064e-43	3.570978583902051e-42	3.933273596898335
GBRR3_HUMAN	111320	Ventricular hypokinesia	1778	111	8.718171880478937e-32	6.7587463795704635e-31	3.995709392077747
GBRR3_HUMAN	111320	Ventricular tachycardia	7853	454	8.71716300601551e-113	1.9908947155428424e-111	3.6820471121535743
GBRR3_HUMAN	111320	Vertigo positional	746	36	1.8582677406413847e-08	5.559570640517692e-08	3.042640680590912
GBRR3_HUMAN	111320	Vestibular disorder	558	27	9.750647362908582e-07	2.5200577307322553e-06	3.051235710762073
GBRR3_HUMAN	111320	Violence-related symptom	941	45	4.597746320935917e-10	1.544351150739837e-09	3.01377634377727
GBRR3_HUMAN	111320	Vitamin B12 deficiency	1447	52	3.756453282599912e-07	1.0085377969061305e-06	2.236843765978026
GBRR3_HUMAN	111320	Vitamin D deficiency	3780	122	9.322490889470828e-12	3.476158739192431e-11	2.0013481543708216
GBRR3_HUMAN	111320	Vocal cord disorder	938	31	0.00040374585019839807	0.0007636153195451021	2.0509776240293385
GBRR3_HUMAN	111320	Vulvovaginal candidiasis	535	22	0.00010421660068716537	0.00021468769987521507	2.5734268697655427
GBRR3_HUMAN	111320	Walking disability	763	37	1.0521244941555333e-08	3.208763059844246e-08	3.0582403841109294
GBRR3_HUMAN	111320	Weight gain poor	806	26	0.0012595086120645626	0.0021974187132737942	2.0002545214995804
GBRR3_HUMAN	111320	White blood cell count increased	19468	886	1.833926278294936e-153	5.64057775665338e-152	2.861197136016514
GBRR3_HUMAN	111320	White blood cells urine positive	711	36	5.5042089044429596e-09	1.7146503958686592e-08	3.2004072343993295
GBRR3_HUMAN	111320	Withdrawal syndrome	10661	660	5.576145417180056e-178	1.97615524228308e-176	3.960107941774992
GBRR3_HUMAN	111320	Wound complication	1160	46	8.813597378724109e-08	2.4978527303486744e-07	2.4778736442274876
GBRR3_HUMAN	111320	Wound dehiscence	1854	74	1.1498104135702545e-11	4.264825089352618e-11	2.4946994593983534
GBRR3_HUMAN	111320	Wound drainage	632	26	2.598487160861982e-05	5.7715884635982976e-05	2.5745850276727276
GBRR3_HUMAN	111320	Wound haemorrhage	1254	43	1.015946649949517e-05	2.3627996734169138e-05	2.1307418106808087
GBRR3_HUMAN	111320	Wound infection staphylococcal	1189	48	2.90579569980899e-08	8.56127315257658e-08	2.524422884276421
A9UF02_HUMAN	29221	Abdominal abscess	1676	18	0.0004908450001321247	0.000916610122610216	2.5123355317814506
A9UF02_HUMAN	29221	Abdominal adhesions	1545	16	0.001411160568604638	0.002443405312346567	2.4215986115506984
A9UF02_HUMAN	29221	Abdominal mass	1075	42	3.458450031148044e-26	2.3038730952233012e-25	9.40889518614247
A9UF02_HUMAN	29221	Abscess intestinal	914	8	0.06625967151895386	0.07756366116324451	2.043390881380253
A9UF02_HUMAN	29221	Accident	3949	62	2.5517531035928447e-17	1.255693036139132e-16	3.6911934843353347
A9UF02_HUMAN	29221	Acute abdomen	747	9	0.005753031406999044	0.008863940517118122	2.8221221623940687
A9UF02_HUMAN	29221	Acute febrile neutrophilic dermatosis	892	9	0.01668824464230455	0.023140919680028963	2.3586932682296973
A9UF02_HUMAN	29221	Acute graft versus host disease	1969	28	8.395166571056434e-08	2.3830498087694954e-07	3.338275365717043
A9UF02_HUMAN	29221	Acute graft versus host disease in intestine	682	11	0.00023247717375951435	0.00045585539020925257	3.793672415021535
A9UF02_HUMAN	29221	Acute graft versus host disease in skin	1303	30	3.861257662694135e-13	1.557614674072727e-12	5.453590353094586
A9UF02_HUMAN	29221	Acute leukaemia	959	29	1.0838612997972943e-15	4.965516074924915e-15	7.2161360238420365
A9UF02_HUMAN	29221	Acute lymphocytic leukaemia	1043	122	3.460572728273639e-129	8.995357124299193e-128	30.654191218881934
A9UF02_HUMAN	29221	Acute myeloid leukaemia	5985	83	2.1473187133226974e-19	1.1455757969336434e-18	3.254382147959002
A9UF02_HUMAN	29221	Acute respiratory distress syndrome	7488	67	7.051163626963986e-08	2.0145041093058335e-07	2.0893059102806912
A9UF02_HUMAN	29221	Adenocarcinoma	963	20	1.584005625650755e-08	4.764808262646233e-08	4.908038543294031
A9UF02_HUMAN	29221	Adenocarcinoma pancreas	667	6	0.07093963238810011	0.08234165345794107	2.1005810951556456
A9UF02_HUMAN	29221	Alveolitis	907	13	0.00020765471861538615	0.0004100508346003064	3.3650807887159693
A9UF02_HUMAN	29221	Alveolitis allergic	756	16	3.22447766565041e-07	8.70475149549408e-07	5.0035463203527275
A9UF02_HUMAN	29221	Amyotrophic lateral sclerosis	851	12	0.0004130399059492217	0.0007798751863966221	3.3098548364669407
A9UF02_HUMAN	29221	Anaemia	81132	1056	2.9402335350929837e-208	1.2164422240144577e-206	3.0517658510168735
A9UF02_HUMAN	29221	Anaemia macrocytic	948	21	2.3152502647432283e-09	7.417029338583156e-09	5.242388741793512
A9UF02_HUMAN	29221	Anal abscess	1475	18	0.00010827205293623982	0.0002224766407404531	2.858924029988775
A9UF02_HUMAN	29221	Anal fissure	1336	14	0.0024367674905783013	0.004043187080453979	2.450677944348253
A9UF02_HUMAN	29221	Anal haemorrhage	1048	14	0.00024621124218370487	0.0004811554252821651	3.133265224785678
A9UF02_HUMAN	29221	Angioplasty	973	11	0.0038852952249170446	0.006200695484477897	2.646106227109615
A9UF02_HUMAN	29221	Anorectal disorder	1010	11	0.005098010560706245	0.007940906725291373	2.548102292772222
A9UF02_HUMAN	29221	Aortic calcification	600	7	0.016357523021623428	0.02272780361316898	2.7317000357743595
A9UF02_HUMAN	29221	Aortic stenosis	1800	16	0.009788398092760909	0.01431950449850825	2.0754620387113327
A9UF02_HUMAN	29221	Aplasia	931	36	1.5590016305898179e-22	9.279294124164092e-22	9.308273322220435
A9UF02_HUMAN	29221	Aplastic anaemia	2182	27	1.937199216128183e-06	4.860305996933769e-06	2.8993867598795675
A9UF02_HUMAN	29221	Ascites	12351	279	2.228050831162915e-106	4.806001239627268e-105	5.348286185491343
A9UF02_HUMAN	29221	Aspergillosis	1496	22	1.1190708596635587e-06	2.8760375137487815e-06	3.4539405569599047
A9UF02_HUMAN	29221	Atelectasis	5864	55	2.1403293003084048e-07	5.868008890704752e-07	2.1910433727659235
A9UF02_HUMAN	29221	Autoimmune hepatitis	2251	25	2.6880368760527936e-05	5.9607206380938774e-05	2.5989894128067568
A9UF02_HUMAN	29221	Bacterial sepsis	1421	14	0.006351945528926234	0.009692113271555466	2.3026270379732696
A9UF02_HUMAN	29221	Basedow's disease	1021	9	0.047406140720284554	0.05806363335411122	2.0580297982676115
A9UF02_HUMAN	29221	Bile duct obstruction	1239	13	0.0033721033274337025	0.0054444130840355905	2.4538191069429667
A9UF02_HUMAN	29221	Bile duct stone	1428	14	0.006465835796256297	0.009847128655717087	2.2912278942209268
A9UF02_HUMAN	29221	Biliary dilatation	746	11	0.0004905593078668563	0.000916139291205864	3.4633390346659176
A9UF02_HUMAN	29221	Bilirubin conjugated increased	1330	16	0.00029590057844481715	0.0005714816608956155	2.817826694871399
A9UF02_HUMAN	29221	Bladder neoplasm	712	8	0.013131978508456977	0.018661267992644247	2.6297047422308366
A9UF02_HUMAN	29221	Bladder transitional cell carcinoma	726	11	0.00039215095348093957	0.0007433081100747878	3.5602156510202096
A9UF02_HUMAN	29221	Blast crisis in myelogenous leukaemia	691	512	0.0	0.0	661.9216584690089
A9UF02_HUMAN	29221	Bleeding time prolonged	622	7	0.019466962122465868	0.02650995992243399	2.6339806849011307
A9UF02_HUMAN	29221	Blood albumin decreased	4562	50	9.074960184270223e-09	2.7820129842553852e-08	2.564428383381135
A9UF02_HUMAN	29221	Blood alkaline phosphatase increased	15112	168	1.163009153121579e-26	7.853685335543295e-26	2.6015494452048102
A9UF02_HUMAN	29221	Blood amylase increased	3075	39	6.412349816023472e-09	1.9878507080646146e-08	2.9727097086087717
A9UF02_HUMAN	29221	Blood bilirubin increased	14575	173	1.1461306252191403e-30	8.647356129524077e-30	2.7797962085628565
A9UF02_HUMAN	29221	Blood blister	1304	23	2.7633462036947268e-08	8.154090546999022e-08	4.15497454978549
A9UF02_HUMAN	29221	Blood count abnormal	4717	53	9.826010522353123e-10	3.22822431256969e-09	2.6297047422308366
A9UF02_HUMAN	29221	Blood creatinine increased	29840	356	8.369991089768352e-62	1.118631073912174e-60	2.7941727772557203
A9UF02_HUMAN	29221	Blood disorder	3432	45	1.6950609137702367e-10	5.854699972103135e-10	3.0745883611556284
A9UF02_HUMAN	29221	Blood fibrinogen increased	577	5	0.10607308359454341	0.11524280942165746	2.022849801716028
A9UF02_HUMAN	29221	Blood immunoglobulin G increased	601	6	0.04762183779424619	0.0582990834253347	2.333586729240137
A9UF02_HUMAN	29221	Blood iron decreased	2913	28	0.00015665274523583527	0.0003148089578887488	2.2459592668481045
A9UF02_HUMAN	29221	Blood lactate dehydrogenase increased	9536	169	6.146635945168555e-51	6.968690447079188e-50	4.175186177693711
A9UF02_HUMAN	29221	Blood phosphorus decreased	1235	17	3.958425601526161e-05	8.600734212310509e-05	3.229916497846742
A9UF02_HUMAN	29221	Blood urea increased	10874	118	1.650068376588734e-18	8.517747456289852e-18	2.5387554893385094
A9UF02_HUMAN	29221	Blood uric acid increased	2340	51	3.2660299261088485e-20	1.7962224698510106e-19	5.156013491975532
A9UF02_HUMAN	29221	Blood urine	612	8	0.0056187320036242125	0.008675730388069456	3.065086322070379
A9UF02_HUMAN	29221	Bone erosion	684	6	0.07784284432772227	0.08883548699724968	2.047911657666492
A9UF02_HUMAN	29221	Bone lesion	1602	15	0.005893947557666556	0.009060207993221488	2.1872780464679926
A9UF02_HUMAN	29221	Bone marrow disorder	1259	46	2.622911544278476e-27	1.8059447245113927e-26	8.775799502514777
A9UF02_HUMAN	29221	Bone marrow failure	9688	269	6.247711174661142e-123	1.5493881316663183e-121	6.609021197376406
A9UF02_HUMAN	29221	Bone marrow toxicity	642	8	0.007391515808093886	0.011120434470375471	2.9200506916885
A9UF02_HUMAN	29221	Bone marrow transplant	980	60	1.1492654976101987e-47	1.2353936338429375e-46	15.092218520629148
A9UF02_HUMAN	29221	Bone pain	22621	260	1.0622979203475975e-42	1.0417207774702945e-41	2.6907403292447363
A9UF02_HUMAN	29221	Brain herniation	1295	14	0.0018436518721172636	0.0031280909963281103	2.5291149433476896
A9UF02_HUMAN	29221	Brain natriuretic peptide increased	1208	22	3.150982693825238e-08	9.259200034832505e-08	4.292671484788279
A9UF02_HUMAN	29221	Brain neoplasm malignant	807	9	0.009251527625711785	0.013616780995073791	2.6099325261238375
A9UF02_HUMAN	29221	Breath sounds abnormal	1751	19	0.0003079094760358342	0.0005930703699168739	2.5386064255253804
A9UF02_HUMAN	29221	Bronchopulmonary aspergillosis	2306	44	1.2810776427682377e-15	5.849412833420892e-15	4.501422087496817
A9UF02_HUMAN	29221	C-reactive protein increased	12040	126	2.3453751572550983e-18	1.20355019229116e-17	2.447386787129051
A9UF02_HUMAN	29221	CSF protein increased	570	9	0.0009665887936853243	0.0017202529375540004	3.712524341972946
A9UF02_HUMAN	29221	Cachexia	2150	36	1.744952028754167e-11	6.404203926468172e-11	3.9408252712333445
A9UF02_HUMAN	29221	Calculus ureteric	811	10	0.0031682480865108014	0.005144711515259164	2.8890638865956753
A9UF02_HUMAN	29221	Calculus urinary	689	8	0.010973661468648643	0.015879982518476082	2.7185200272107326
A9UF02_HUMAN	29221	Cancer pain	524	5	0.07809953477205017	0.08907748483904962	2.22942213214175
A9UF02_HUMAN	29221	Cardiac discomfort	526	5	0.07907401675381553	0.09002202802917554	2.2208638897918775
A9UF02_HUMAN	29221	Cardiac enzymes increased	808	7	0.09374825598708675	0.10437578759801795	2.0223447206169727
A9UF02_HUMAN	29221	Cardiac failure	31046	291	2.1272710737427819e-32	1.674674138471697e-31	2.189610763747269
A9UF02_HUMAN	29221	Cardiac failure acute	2003	22	9.195877698163518e-05	0.00019086760501435627	2.569968894981777
A9UF02_HUMAN	29221	Cardiotoxicity	1900	19	0.0010850846584204734	0.0019154746726640119	2.33751532642741
A9UF02_HUMAN	29221	Catheter placement	780	10	0.002407914701982978	0.003998336766111473	3.005376848263813
A9UF02_HUMAN	29221	Cerebral haemorrhage	15194	164	7.406726521119419e-25	4.7473099718305544e-24	2.5250764364521245
A9UF02_HUMAN	29221	Chest X-ray abnormal	2115	26	3.3241605047432377e-06	8.143005654110057e-06	2.880212757407446
A9UF02_HUMAN	29221	Cholangitis	1980	21	0.00020827321205342395	0.00041119686761318666	2.4807015638808503
A9UF02_HUMAN	29221	Chronic graft versus host disease	1247	39	4.7238467049726204e-21	2.6752502053795282e-20	7.471147910046548
A9UF02_HUMAN	29221	Chronic lymphocytic leukaemia	1534	19	5.855353121637454e-05	0.0001245397319431018	2.902221999346507
A9UF02_HUMAN	29221	Chronic myeloid leukaemia	1856	778	0.0	0.0	167.01308485351763
A9UF02_HUMAN	29221	Colectomy	1874	27	1.0940900453956304e-07	3.076699992463794e-07	3.382879516805884
A9UF02_HUMAN	29221	Colon cancer	5749	99	1.2614021128823186e-29	9.257262273346846e-29	4.054865082179655
A9UF02_HUMAN	29221	Colon cancer metastatic	849	12	0.0004045941268152189	0.0007651026378476221	3.3177636891227755
A9UF02_HUMAN	29221	Colorectal cancer	777	15	2.276869875092808e-06	5.6743494794794415e-06	4.555394041659717
A9UF02_HUMAN	29221	Colostomy	731	18	6.2964238318423616e-09	1.9530360590967796e-08	5.84214910475967
A9UF02_HUMAN	29221	Computerised tomogram abnormal	1590	31	1.0577254372430827e-11	3.931596649295195e-11	4.601561601543119
A9UF02_HUMAN	29221	Concomitant disease aggravated	1409	29	1.3539813997232596e-11	5.0015030444568006e-11	4.8630481899805025
A9UF02_HUMAN	29221	Concomitant disease progression	1376	61	2.392306155265833e-40	2.240173556731404e-39	10.734794719616069
A9UF02_HUMAN	29221	Congestive cardiomyopathy	2373	22	0.0012862369919094984	0.00224106936073285	2.1655076056822202
A9UF02_HUMAN	29221	Conjunctival haemorrhage	1679	80	1.0543224646304408e-54	1.2705983263522749e-53	11.577937076488485
A9UF02_HUMAN	29221	Conjunctival hyperaemia	1341	12	0.018249720296233517	0.025034974806164446	2.0895170863775494
A9UF02_HUMAN	29221	Crepitations	1455	15	0.0020367097467786626	0.0034288543965771217	2.4105626803782667
A9UF02_HUMAN	29221	Cytogenetic abnormality	707	29	3.8206940665821326e-19	2.020159415007941e-18	9.898239678721378
A9UF02_HUMAN	29221	Cytolytic hepatitis	3634	52	2.8813493372600817e-13	1.1702074410500244e-12	3.3594441374785893
A9UF02_HUMAN	29221	Cytomegalovirus test positive	748	7	0.04536669971845311	0.055844900073962034	2.186097329573813
A9UF02_HUMAN	29221	Deafness bilateral	631	7	0.020850427739014184	0.028201405816900445	2.5959905788689026
A9UF02_HUMAN	29221	Death	288756	9789	0.0	0.0	8.120357660617184
A9UF02_HUMAN	29221	Death neonatal	760	9	0.006406145925134503	0.00976580437231011	2.7732705137773936
A9UF02_HUMAN	29221	Decreased immune responsiveness	1607	16	0.0030599050337769412	0.004985662953359141	2.327230846675687
A9UF02_HUMAN	29221	Dengue fever	878	28	8.952149664478882e-16	4.116764286228348e-15	7.6230499821844475
A9UF02_HUMAN	29221	Dermatitis exfoliative	3811	41	2.8775847796628556e-07	7.801379124351886e-07	2.516704167100493
A9UF02_HUMAN	29221	Diabetic nephropathy	878	11	0.0017932198574388337	0.0030479567814052227	2.9360486626060553
A9UF02_HUMAN	29221	Diabetic retinopathy	1552	14	0.009921742902576263	0.01449766247726975	2.106499507430683
A9UF02_HUMAN	29221	Diastolic dysfunction	1518	15	0.004451741881111445	0.007020796827583224	2.3095211309013335
A9UF02_HUMAN	29221	Diffuse alveolar damage	537	5	0.08454939780811825	0.09543538350218993	2.1749437717698648
A9UF02_HUMAN	29221	Diffuse large B-cell lymphoma	1410	13	0.01173150217519881	0.016864757290434705	2.153459001511866
A9UF02_HUMAN	29221	Dilatation ventricular	2111	27	1.054466898851922e-06	2.7170159663671935e-06	2.998166251219035
A9UF02_HUMAN	29221	Disease complication	1815	24	2.320769329476591e-06	5.778583467945347e-06	3.101025357672544
A9UF02_HUMAN	29221	Disseminated intravascular coagulation	7696	98	4.273744228369435e-20	2.3408609124650213e-19	2.9848083307447664
A9UF02_HUMAN	29221	Diverticular perforation	1033	10	0.015623868452375884	0.021810790979700956	2.262111606220074
A9UF02_HUMAN	29221	Drug exposure before pregnancy	954	10	0.00944830364019333	0.013872827783981885	2.451419674960949
A9UF02_HUMAN	29221	Drug intolerance	17455	343	1.2438459235714078e-113	2.862786975378939e-112	4.638558201232794
A9UF02_HUMAN	29221	Drug resistance	4862	409	0.0	0.0	21.254959147175448
A9UF02_HUMAN	29221	Drug tolerance decreased	503	9	0.0004007907952560667	0.0007584890826712259	4.216044849892353
A9UF02_HUMAN	29221	Dyspnoea exertional	10679	109	1.737094472204985e-15	7.885347728006372e-15	2.3863886364690807
A9UF02_HUMAN	29221	Echocardiogram abnormal	780	15	2.3849664017778397e-06	5.930564588167843e-06	4.537529751300267
A9UF02_HUMAN	29221	Effusion	698	13	1.5252283600779234e-05	3.479016720531761e-05	4.391798868776754
A9UF02_HUMAN	29221	Ejection fraction decreased	5737	98	4.402537696071593e-29	3.1845281972326365e-28	4.021736779038612
A9UF02_HUMAN	29221	Endotracheal intubation	1336	35	1.0127705064274741e-16	4.858330245159375e-16	6.2255884750737716
A9UF02_HUMAN	29221	Enterococcal infection	1957	18	0.002876833510928885	0.0047106489472481935	2.1482477110333393
A9UF02_HUMAN	29221	Eosinophil count increased	2787	52	9.170240088736205e-18	4.5951623812674035e-17	4.39982775153503
A9UF02_HUMAN	29221	Eosinophilia	5952	62	9.243043730029341e-10	3.042020884054421e-09	2.4359370243822487
A9UF02_HUMAN	29221	Erythema nodosum	1249	15	0.00045730245920210904	0.0008579614006973356	2.8129742785613483
A9UF02_HUMAN	29221	Escherichia bacteraemia	623	6	0.054778971728619306	0.06580790354028006	2.250379422849079
A9UF02_HUMAN	29221	Escherichia infection	2903	31	1.0519309498709419e-05	2.441911823201008e-05	2.497853250976923
A9UF02_HUMAN	29221	Escherichia sepsis	1280	11	0.02918052966304396	0.03800340600225741	2.0059528687781323
A9UF02_HUMAN	29221	Exfoliative rash	1333	15	0.0008773140749927116	0.0015714722629293655	2.6336951894876357
A9UF02_HUMAN	29221	Exophthalmos	816	12	0.00028488731232957355	0.0005516375467144246	3.4539405569599047
A9UF02_HUMAN	29221	Extensor plantar response	615	6	0.05210545429826929	0.06303339214660757	2.2799410573035823
A9UF02_HUMAN	29221	Extremity necrosis	712	7	0.03646433539658346	0.046180331410658866	2.297727831509497
A9UF02_HUMAN	29221	Eye discharge	2785	25	0.0007298492231866911	0.0013253774035436945	2.096141461198493
A9UF02_HUMAN	29221	Eye haemorrhage	5687	125	2.0306951543279021e-47	2.172810924456843e-46	5.200782481938009
A9UF02_HUMAN	29221	Eye oedema	1054	47	1.3697079538001019e-31	1.0570215450466333e-30	10.800852843959026
A9UF02_HUMAN	29221	Eye swelling	13396	246	2.79975778403184e-76	4.494088714101073e-75	4.329113936107464
A9UF02_HUMAN	29221	Eyelid disorder	974	9	0.04229323325469098	0.052528385413182874	2.1582654464733912
A9UF02_HUMAN	29221	Eyelid oedema	6795	179	6.992134250984392e-79	1.1567733393999304e-77	6.261050347584664
A9UF02_HUMAN	29221	Face oedema	8154	213	7.252981633651348e-93	1.38008468251135e-91	6.207176135042791
A9UF02_HUMAN	29221	Febrile bone marrow aplasia	1136	33	3.911406597206942e-17	1.9094072948246654e-16	6.92353814273649
A9UF02_HUMAN	29221	Fibrin D dimer increased	1569	14	0.01062863136160258	0.015423931578797722	2.083470252365524
A9UF02_HUMAN	29221	Fibrosis	1581	21	8.96327503083978e-06	2.097258963048227e-05	3.115188694642683
A9UF02_HUMAN	29221	Fluid retention	18723	394	1.0633359775352675e-139	2.985851237828998e-138	4.974473393127152
A9UF02_HUMAN	29221	Food interaction	778	9	0.00740264796409821	0.011135116961754347	2.7083565095537354
A9UF02_HUMAN	29221	Food intolerance	1071	11	0.007730628438323067	0.011581381805476494	2.401466217433443
A9UF02_HUMAN	29221	Full blood count abnormal	622	16	2.3503207021306183e-08	6.975168634956821e-08	6.109941051255806
A9UF02_HUMAN	29221	Full blood count decreased	4845	96	2.4380982314786646e-33	1.9620008889904326e-32	4.677983925535083
A9UF02_HUMAN	29221	Fungaemia	512	5	0.07238980139488878	0.08371759222191426	2.2821895198847497
A9UF02_HUMAN	29221	Gangrene	2534	22	0.002189876819896943	0.0036663908679276445	2.0267151198084794
A9UF02_HUMAN	29221	Gastric cancer	2829	88	3.443262797609284e-45	3.5424535295545554e-44	7.429563489177526
A9UF02_HUMAN	29221	Gastric perforation	997	14	0.0001489610033663161	0.00030033878699255184	3.295825272053296
A9UF02_HUMAN	29221	Gastrointestinal carcinoma	1119	13	0.0014179302684810095	0.002454292756635135	2.7200562614033243
A9UF02_HUMAN	29221	Gastrointestinal motility disorder	1540	16	0.0013660994481108776	0.002371234976815408	2.4295434888851823
A9UF02_HUMAN	29221	Gastrointestinal necrosis	1437	15	0.0018114321264596227	0.00307691071600015	2.4410761320286243
A9UF02_HUMAN	29221	Gastrointestinal oedema	705	10	0.001158092424593372	0.002032880640152405	3.3296980908822107
A9UF02_HUMAN	29221	Gastrointestinal perforation	1669	20	5.945679190392359e-05	0.000126360432230661	2.8067194337939796
A9UF02_HUMAN	29221	Gastrointestinal stromal tumour	1264	731	0.0	0.0	317.3802001092406
A9UF02_HUMAN	29221	Gastrointestinal toxicity	1131	21	4.6410616195276426e-08	1.3457323157495613e-07	4.378103030308635
A9UF02_HUMAN	29221	Gastrointestinal tube insertion	1006	9	0.045563802524682895	0.056062135140172026	2.0889931352525806
A9UF02_HUMAN	29221	General physical condition abnormal	2134	27	1.2883024606112923e-06	3.2911172407369974e-06	2.965438285496188
A9UF02_HUMAN	29221	General physical health deterioration	36763	381	2.11556779739721e-51	2.4160139221275243e-50	2.4234165410784314
A9UF02_HUMAN	29221	Generalised oedema	5647	147	1.8672813901445787e-64	2.5835945045809687e-63	6.185065553726927
A9UF02_HUMAN	29221	Glioblastoma multiforme	522	6	0.02685874916741158	0.03527275703702154	2.6908606664687627
A9UF02_HUMAN	29221	Glomerular filtration rate decreased	2906	27	0.00029106949741749123	0.000562808526639884	2.1702599748317013
A9UF02_HUMAN	29221	Glomerulonephritis	1080	14	0.0003317152791495914	0.0006360060757801727	3.0392084825782275
A9UF02_HUMAN	29221	Graft versus host disease	3271	111	3.002780246858277e-60	3.9259889938241024e-59	8.12878351965532
A9UF02_HUMAN	29221	Growth retardation	1373	29	7.360856298579182e-12	2.7609657838105463e-11	4.993308409354981
A9UF02_HUMAN	29221	Haematochezia	16020	143	4.20967867622536e-15	1.8765852966537906e-14	2.084285726285372
A9UF02_HUMAN	29221	Haematocrit decreased	11489	197	6.3371495622768e-57	7.892691889591282e-56	4.037244191579329
A9UF02_HUMAN	29221	Haematotoxicity	2406	69	1.1020613274225737e-33	8.939107547647336e-33	6.832506287901429
A9UF02_HUMAN	29221	Haemoglobin decreased	45850	700	3.341761594361461e-172	1.148527131291871e-170	3.5878142219583506
A9UF02_HUMAN	29221	Haemorrhage intracranial	6600	57	1.81504594216117e-06	4.566706560086019e-06	2.0159863956946165
A9UF02_HUMAN	29221	Haemorrhage subcutaneous	1493	15	0.0025892887842439917	0.00427481867510846	2.348586102668947
A9UF02_HUMAN	29221	Haemorrhagic diathesis	1460	19	3.061954395609532e-05	6.7439890467611e-05	3.0512604642678407
A9UF02_HUMAN	29221	Haemothorax	1256	14	0.0013958297825692315	0.002418872283968493	2.6085315961581244
A9UF02_HUMAN	29221	Hair colour changes	1960	18	0.0029165681569468535	0.004770572489757308	2.144929099739261
A9UF02_HUMAN	29221	Hair texture abnormal	2504	22	0.001953121200461772	0.0032994128268338	2.051212079354915
A9UF02_HUMAN	29221	Helicobacter gastritis	562	5	0.09771038385298728	0.10804637322949473	2.077325110559368
A9UF02_HUMAN	29221	Hemianopia	536	5	0.08404357809528136	0.09493811694248966	2.1790397110763995
A9UF02_HUMAN	29221	Hepatic congestion	839	11	0.0012596058812526067	0.002197558159164414	3.0743408097577896
A9UF02_HUMAN	29221	Hepatic cyst	1613	23	1.0841393190556428e-06	2.790110601987942e-06	3.3474983636951023
A9UF02_HUMAN	29221	Hepatic enzyme abnormal	1701	17	0.002135473593442376	0.0035825278429849824	2.3361272531931894
A9UF02_HUMAN	29221	Hepatic fibrosis	1411	18	6.26188839129213e-05	0.0001327258924458544	2.990274452041382
A9UF02_HUMAN	29221	Hepatic lesion	1638	50	4.641486252295677e-26	3.080988469486616e-25	7.286335557818439
A9UF02_HUMAN	29221	Hepatic mass	563	21	1.690471924890591e-13	6.950696931659616e-13	8.966225763178203
A9UF02_HUMAN	29221	Hepatic necrosis	2484	42	2.8534091180268684e-13	1.1593570110813466e-12	3.9800936639169415
A9UF02_HUMAN	29221	Hepatic neoplasm	1501	59	3.021512949762235e-36	2.5967471355423537e-35	9.46839599283114
A9UF02_HUMAN	29221	Hepatic neoplasm malignant	2443	23	0.0008657301081989352	0.0015519814002896868	2.1993894207748816
A9UF02_HUMAN	29221	Hepatitis B	3280	38	9.727871798014807e-08	2.747671630154449e-07	2.7124406718136695
A9UF02_HUMAN	29221	Hepatitis toxic	1331	12	0.017613964884273667	0.024276509611389465	2.1053587625441725
A9UF02_HUMAN	29221	Hepatomegaly	5369	73	8.031019121989292e-17	3.8690313082021015e-16	3.189808018144051
A9UF02_HUMAN	29221	Hepatosplenomegaly	1371	26	8.19306566090437e-10	2.7057779563313437e-09	4.473430818010524
A9UF02_HUMAN	29221	Hepatotoxicity	6522	76	4.9679268549912945e-14	2.101232593494516e-13	2.7284308588333595
A9UF02_HUMAN	29221	Human herpesvirus 6 infection	573	6	0.03939236773138825	0.0494065519337324	2.448825580066811
A9UF02_HUMAN	29221	Hydrocele	536	9	0.0006294045383463196	0.0011549737163699752	3.9520420414550714
A9UF02_HUMAN	29221	Hydrocephalus	2410	22	0.0014199963382129372	0.002457512250447802	2.131954933399874
A9UF02_HUMAN	29221	Hydronephrosis	3149	35	7.670514868258007e-07	2.0019436645177593e-06	2.600992487498708
A9UF02_HUMAN	29221	Hyperbilirubinaemia	3886	34	0.00017960324183130354	0.0003580865480100854	2.0425951684202137
A9UF02_HUMAN	29221	Hyperkeratosis	2127	24	3.0081407242057668e-05	6.631587271735501e-05	2.6409588281462324
A9UF02_HUMAN	29221	Hyperplasia	516	13	5.917549110834165e-07	1.5605281059372527e-06	5.980879175173115
A9UF02_HUMAN	29221	Hyperuricaemia	1872	31	5.435229682704693e-10	1.8170166254736053e-09	3.8967053431861607
A9UF02_HUMAN	29221	Hypoalbuminaemia	3124	37	8.330510705080346e-08	2.3653589375981924e-07	2.7736697896675104
A9UF02_HUMAN	29221	Hypocoagulable state	580	5	0.10778655702211676	0.11678050537237482	2.012295802750553
A9UF02_HUMAN	29221	Hypogammaglobulinaemia	1160	11	0.02005604804607878	0.027232022489432395	2.2154518629063964
A9UF02_HUMAN	29221	Hypoproteinaemia	854	17	3.2734463199061544e-07	8.832360059788589e-07	4.7001652262572655
A9UF02_HUMAN	29221	Hypovolaemic shock	1715	18	0.0006373697885474153	0.0011686572493720007	2.454597708717528
A9UF02_HUMAN	29221	Ileostomy	739	7	0.043022368116677666	0.05329621303227594	2.2129755754292284
A9UF02_HUMAN	29221	Ileus	5380	57	1.9903594994841826e-09	6.4069180749677894e-09	2.478038509680608
A9UF02_HUMAN	29221	Ileus paralytic	2132	24	3.119612697313621e-05	6.863913408901225e-05	2.6346946943033807
A9UF02_HUMAN	29221	Incision site pain	559	7	0.01152861968923517	0.016601327879351667	2.9345980456778897
A9UF02_HUMAN	29221	Infertility	784	7	0.0555525223439927	0.06660435916648619	2.084810966813636
A9UF02_HUMAN	29221	Intermittent claudication	970	13	0.0003908910299853061	0.0007411084249972322	3.143555094161
A9UF02_HUMAN	29221	Interstitial lung disease	16232	172	3.6232050895741065e-25	2.342778218166671e-24	2.47840666117098
A9UF02_HUMAN	29221	Intestinal operation	572	7	0.012930285720456548	0.018411560408580472	2.867076320733089
A9UF02_HUMAN	29221	Intestinal polyp	695	6	0.08250398258584891	0.09340325414601322	2.015216406237854
A9UF02_HUMAN	29221	Intestinal resection	1673	17	0.0019834809940766345	0.003346756749160272	2.3756269893582918
A9UF02_HUMAN	29221	Intra-abdominal haemorrhage	1127	25	7.160152078836885e-11	2.5308209436223935e-10	5.249864276685881
A9UF02_HUMAN	29221	Intracranial pressure increased	2287	21	0.0018425671356474239	0.0031263551936046912	2.144613576188255
A9UF02_HUMAN	29221	Iron deficiency	1191	15	0.0002804488437968847	0.0005435415205036919	2.9517094045448165
A9UF02_HUMAN	29221	Iron deficiency anaemia	3800	41	2.7604431127876553e-07	7.496528601331914e-07	2.524068824147076
A9UF02_HUMAN	29221	Ischaemic cerebral infarction	579	5	0.10721389940025977	0.11626245062679452	2.015801544567192
A9UF02_HUMAN	29221	Kaposi's sarcoma	951	10	0.009257802467380087	0.013625007687720226	2.459235040555936
A9UF02_HUMAN	29221	Kidney enlargement	541	7	0.00977368801626411	0.014300420150181532	3.033517080925459
A9UF02_HUMAN	29221	Lacrimation increased	8490	97	6.445583930708762e-17	3.118449796283751e-16	2.674509672308164
A9UF02_HUMAN	29221	Large intestinal haemorrhage	881	8	0.06166717545938974	0.07283783362494187	2.1206324610887846
A9UF02_HUMAN	29221	Left atrial dilatation	922	11	0.0026026832033960185	0.004295113678756744	2.794241701953293
A9UF02_HUMAN	29221	Left ventricular dysfunction	2527	23	0.0010910555946729863	0.0019251919733291108	2.125607986531634
A9UF02_HUMAN	29221	Left ventricular hypertrophy	2279	25	3.2733380165241836e-05	7.183235456791734e-05	2.5667038300389713
A9UF02_HUMAN	29221	Leukaemia	2982	50	2.355912017129661e-15	1.0629195070025667e-14	3.9463509092140794
A9UF02_HUMAN	29221	Leukaemia recurrent	826	180	1.7019036307885503e-241	8.198132904662857e-240	64.4806859395301
A9UF02_HUMAN	29221	Leukocytosis	7970	175	1.318277019715819e-65	1.854870831346658e-64	5.195311485613199
A9UF02_HUMAN	29221	Leukopenia	18517	179	6.2476147055436805e-22	3.644587352539588e-21	2.258867330113433
A9UF02_HUMAN	29221	Lichen planus	888	25	4.59725402526058e-13	1.8472499500571593e-12	6.703766434423918
A9UF02_HUMAN	29221	Lichenoid keratosis	655	21	2.939399865674126e-12	1.1291153868872497e-11	7.665133065682312
A9UF02_HUMAN	29221	Lip and/or oral cavity cancer	608	10	0.0003778133353245065	0.0007180973396202513	3.8697996206741405
A9UF02_HUMAN	29221	Lipase increased	3735	44	6.307628117330663e-09	1.9563617745579178e-08	2.7586607320286642
A9UF02_HUMAN	29221	Liver abscess	1066	26	3.86694677316276e-12	1.4746752464988492e-11	5.7853504329078405
A9UF02_HUMAN	29221	Liver disorder	18221	165	9.926394589730816e-18	4.9660652786155234e-17	2.1147160421572746
A9UF02_HUMAN	29221	Localised intraabdominal fluid collection	501	5	0.0673639564367567	0.07870338571162196	2.332802593914452
A9UF02_HUMAN	29221	Localised oedema	2086	18	0.006315362771798039	0.009641619459402732	2.0142419302193644
A9UF02_HUMAN	29221	Lung abscess	787	9	0.007943205193343439	0.011867611705619835	2.6770259072581264
A9UF02_HUMAN	29221	Lung adenocarcinoma	1056	34	6.116031277031824e-19	3.2088951779090987e-18	7.698705077059357
A9UF02_HUMAN	29221	Lung consolidation	1452	17	0.0002659273013519366	0.0005171768931797019	2.7414901006113808
A9UF02_HUMAN	29221	Lung disorder	17275	156	1.2700115042858013e-16	6.066954383347468e-16	2.1088023074563305
A9UF02_HUMAN	29221	Lung infection	9369	89	2.47936911191774e-11	9.016890347039844e-11	2.219380122968956
A9UF02_HUMAN	29221	Lung infiltration	6119	97	1.92544702703822e-26	1.2921699567898572e-25	3.727525685765928
A9UF02_HUMAN	29221	Lung neoplasm	3324	39	4.8412330099260995e-08	1.4018657993275974e-07	2.7473810274996135
A9UF02_HUMAN	29221	Lung neoplasm malignant	10817	112	3.4907218712234376e-16	1.6360617631719619e-15	2.421146187709213
A9UF02_HUMAN	29221	Lymphadenitis	929	8	0.06877386079089703	0.08015146269880166	2.0101108995988155
A9UF02_HUMAN	29221	Lymphadenopathy mediastinal	735	12	0.0001103537607585232	0.00022650735453548626	3.8408965529678607
A9UF02_HUMAN	29221	Lymphocyte count decreased	4836	44	7.50544693935727e-06	1.7710222638083518e-05	2.1248365529878543
A9UF02_HUMAN	29221	Lymphocyte count increased	1087	19	4.855933514934617e-07	1.2909206249530985e-06	4.116916038398837
A9UF02_HUMAN	29221	Lymphocytic infiltration	535	11	2.7811096239277956e-05	6.155153401629582e-05	4.857927844426431
A9UF02_HUMAN	29221	Lymphoproliferative disorder	915	11	0.0024571772049557716	0.004074210980686165	2.815878529291427
A9UF02_HUMAN	29221	Macrocytosis	542	6	0.03140493032986504	0.04050206204984342	2.5904554177199284
A9UF02_HUMAN	29221	Malignant neoplasm progression	23835	1251	0.0	0.0	12.818762648897817
A9UF02_HUMAN	29221	Malignant pleural effusion	685	13	1.2545308071953037e-05	2.888769292265903e-05	4.4767592635596385
A9UF02_HUMAN	29221	Malnutrition	4794	42	3.235783169778998e-05	7.10489826562876e-05	2.045325910623984
A9UF02_HUMAN	29221	Mass	5270	46	1.2267754541892264e-05	2.827883314571394e-05	2.0377191417592697
A9UF02_HUMAN	29221	Mastectomy	815	11	0.0010017441437986537	0.001778815946934738	3.166112177213246
A9UF02_HUMAN	29221	Mean cell volume increased	672	11	0.00020514756222931904	0.00040540009068555123	3.8510653411186833
A9UF02_HUMAN	29221	Mechanical ventilation	1051	23	5.194155217796807e-10	1.7387467943854324e-09	5.177550971084837
A9UF02_HUMAN	29221	Melaena	9301	91	3.337281260611078e-12	1.2777321788381983e-11	2.286501148293653
A9UF02_HUMAN	29221	Metabolic alkalosis	569	7	0.012596506775784881	0.017996808271944102	2.882380998601771
A9UF02_HUMAN	29221	Metastases to bone	4849	52	7.199416162539325e-09	2.223616225090814e-08	2.508553033239172
A9UF02_HUMAN	29221	Metastases to central nervous system	3934	44	2.739446457141625e-08	8.086156184644062e-08	2.6175364426523906
A9UF02_HUMAN	29221	Metastases to liver	6157	303	3.149362319729311e-206	1.2898068649070895e-204	11.97786936228955
A9UF02_HUMAN	29221	Metastases to lung	3780	62	3.3807602932128743e-18	1.7227197640290485e-17	3.8589750063505766
A9UF02_HUMAN	29221	Metastases to lymph nodes	2355	40	8.944456060061503e-13	3.537780303809137e-12	3.9985143380788526
A9UF02_HUMAN	29221	Metastases to meninges	577	6	0.04050833308710554	0.05064761703336143	2.43167093502256
A9UF02_HUMAN	29221	Metastases to peritoneum	783	63	2.945312980291145e-57	3.686306463182432e-56	20.24872651517744
A9UF02_HUMAN	29221	Metastases to spine	1243	14	0.0012684427837602816	0.0022119627721788665	2.636123875043442
A9UF02_HUMAN	29221	Metastasis	2723	85	8.007300591406985e-44	8.029521611290443e-43	7.456478950677277
A9UF02_HUMAN	29221	Metastatic malignant melanoma	785	12	0.00020125994691235088	0.0003981934430782919	3.5924556375106897
A9UF02_HUMAN	29221	Metastatic neoplasm	1959	27	2.578912523451684e-07	7.021811474858972e-07	3.2340468258491035
A9UF02_HUMAN	29221	Monocyte count increased	1092	16	3.1806221882205195e-05	6.990335725929295e-05	3.441100629238864
A9UF02_HUMAN	29221	Mouth haemorrhage	2960	27	0.00035998107570831055	0.0006865597793959792	2.1303029210843736
A9UF02_HUMAN	29221	Mucosal inflammation	9475	83	5.847764219854108e-09	1.8184882488675058e-08	2.045077026964867
A9UF02_HUMAN	29221	Multi-organ failure	18510	159	3.776351824979225e-15	1.68731273435314e-14	2.0050585119772144
A9UF02_HUMAN	29221	Muscle spasms	74205	747	4.727536393634723e-94	9.099661135522074e-93	2.3532667774141176
A9UF02_HUMAN	29221	Mycobacterial infection	564	5	0.09880551041842833	0.10906794402056413	2.069892820360587
A9UF02_HUMAN	29221	Myelodysplastic syndrome	6646	73	2.706420225789495e-12	1.0417403726269924e-11	2.5700933004854547
A9UF02_HUMAN	29221	Myelofibrosis	949	45	1.9516679857582788e-31	1.50035986694599e-30	11.51950307437402
A9UF02_HUMAN	29221	Myelopathy	636	8	0.007007185378085774	0.01059087684438912	2.94794926517597
A9UF02_HUMAN	29221	Myoglobin blood increased	917	11	0.0024980623810430007	0.004136130035545733	2.8096624618978474
A9UF02_HUMAN	29221	Myositis	3358	34	8.229654668194842e-06	1.9330101165123096e-05	2.3670507186385867
A9UF02_HUMAN	29221	Nail discolouration	1359	13	0.009951336249397615	0.01453802117769842	2.2350536590728654
A9UF02_HUMAN	29221	Necrosis	2898	30	2.0682260377041864e-05	4.647819786291828e-05	2.420648716697841
A9UF02_HUMAN	29221	Neoplasm	4162	116	3.479876673746511e-54	4.160770372576849e-53	6.634707367447448
A9UF02_HUMAN	29221	Neoplasm malignant	21647	1281	0.0	0.0	14.555698526082576
A9UF02_HUMAN	29221	Neoplasm progression	5605	326	3.36917822725362e-244	1.6420620737653222e-242	14.290769017828802
A9UF02_HUMAN	29221	Neoplasm recurrence	1294	200	7.352768002133133e-236	3.4522880554350085e-234	42.306036072452216
A9UF02_HUMAN	29221	Neoplasm skin	551	5	0.0917982650847123	0.10249347049574353	2.1191759827501246
A9UF02_HUMAN	29221	Nephrectomy	563	10	0.00020682462808667003	0.00040851512170826665	4.184701940620499
A9UF02_HUMAN	29221	Nephrogenic anaemia	527	10	0.00012196496520029825	0.0002489683740636044	4.476093178265254
A9UF02_HUMAN	29221	Nephrotic syndrome	2717	27	9.230637347185905e-05	0.0001915557317849344	2.3227429247362337
A9UF02_HUMAN	29221	Neurological decompensation	774	11	0.0006623142703536945	0.0012111676991890538	3.336244024219462
A9UF02_HUMAN	29221	Neutropenia	37149	419	8.409979918867687e-66	1.1865471963996366e-64	2.6398713110682115
A9UF02_HUMAN	29221	Neutropenic sepsis	3081	35	4.7102513624150846e-07	1.2535429771119465e-06	2.6590579796687384
A9UF02_HUMAN	29221	Neutrophil count decreased	12546	136	4.408706547161321e-21	2.499262531866112e-20	2.5360440253842587
A9UF02_HUMAN	29221	No therapeutic response	16711	316	1.1937593433915683e-100	2.4515692080796726e-99	4.460312868066795
A9UF02_HUMAN	29221	Non-Hodgkin's lymphoma	2419	27	1.2101287987223346e-05	2.791478243234004e-05	2.612114743955045
A9UF02_HUMAN	29221	Normal newborn	2487	64	8.742865781025026e-29	6.275163158606e-28	6.1124626942815
A9UF02_HUMAN	29221	Normochromic normocytic anaemia	1838	21	7.659513456086906e-05	0.00016054313068610148	2.674570370744406
A9UF02_HUMAN	29221	Obliterative bronchiolitis	552	21	1.1595581875655762e-13	4.810985044879055e-13	9.151966786520877
A9UF02_HUMAN	29221	Occult blood positive	1488	14	0.007783900407705019	0.011653147185094926	2.1979621726108487
A9UF02_HUMAN	29221	Ocular icterus	2208	20	0.002684246633143449	0.004418265670971816	2.1153018036226108
A9UF02_HUMAN	29221	Oedema	23896	544	1.1933884327482682e-207	4.920454301889945e-206	5.390939766190245
A9UF02_HUMAN	29221	Oedema mucosal	549	6	0.033107290674644164	0.042404511837600196	2.557060964821145
A9UF02_HUMAN	29221	Oedema peripheral	97172	840	3.075719751514664e-75	4.878501897194101e-74	2.017894101084826
A9UF02_HUMAN	29221	Oesophageal stenosis	1231	14	0.0011596275199818036	0.002035321550924061	2.6621168795631807
A9UF02_HUMAN	29221	Optic neuropathy	776	7	0.053176248062742994	0.06414070019868744	2.106499507430683
A9UF02_HUMAN	29221	Oral mucosa erosion	522	6	0.02685874916741158	0.03527275703702154	2.6908606664687627
A9UF02_HUMAN	29221	Organising pneumonia	1643	15	0.006944083994876721	0.010503866224681422	2.1321930342412188
A9UF02_HUMAN	29221	Orthopnoea	1544	15	0.004803339013068952	0.007517337821384298	2.2702486983287797
A9UF02_HUMAN	29221	Osteolysis	1028	10	0.01516173877771705	0.02122701754066685	2.2732221740305856
A9UF02_HUMAN	29221	Osteoporotic fracture	556	5	0.09446218900739521	0.10504064016973619	2.099945710674352
A9UF02_HUMAN	29221	Otorrhoea	652	11	0.00015856367421662146	0.00031845913544471517	3.971223386083385
A9UF02_HUMAN	29221	Ovarian disorder	562	5	0.09771038385298728	0.10804637322949473	2.077325110559368
A9UF02_HUMAN	29221	Pancreatic enzymes increased	678	9	0.0030988202296177063	0.005042909511280357	3.113193058066999
A9UF02_HUMAN	29221	Pancreatic neoplasm	539	10	0.00014616321856466804	0.00029504169276806824	4.374556092935985
A9UF02_HUMAN	29221	Pancytopenia	22869	497	1.4763690943363092e-181	5.329994510736548e-180	5.140924665037004
A9UF02_HUMAN	29221	Papilloedema	1940	29	1.749503910371265e-08	5.2467285058970167e-08	3.5117773428430636
A9UF02_HUMAN	29221	Performance status decreased	2399	23	0.0004702284200981738	0.0008805435254342558	2.2401188544929345
A9UF02_HUMAN	29221	Pericardial effusion	8862	166	3.673903972603761e-53	4.3213053623673535e-52	4.4175168898928305
A9UF02_HUMAN	29221	Periorbital oedema	2318	270	2.8637503593167483e-283	1.6407335309767527e-281	30.508683923537436
A9UF02_HUMAN	29221	Peripheral arterial occlusive disease	1972	31	1.827780974448689e-09	5.8988474044436884e-09	3.695947726329584
A9UF02_HUMAN	29221	Peripheral ischaemia	1855	17	0.003889794360757598	0.0062074067610040085	2.140390802163945
A9UF02_HUMAN	29221	Peripheral motor neuropathy	570	7	0.01270707004566895	0.018137080547626097	2.877261316543864
A9UF02_HUMAN	29221	Peritoneal haemorrhage	908	24	4.9096244296682265e-12	1.8605877522790428e-11	6.28273350180037
A9UF02_HUMAN	29221	Pigmentation disorder	2149	33	9.97684691646833e-10	3.276452591869954e-09	3.6090087766721872
A9UF02_HUMAN	29221	Placental disorder	575	7	0.013270365076016333	0.01883479655747112	2.851933311996823
A9UF02_HUMAN	29221	Plasmacytoma	798	9	0.008644059379874256	0.012812402173253572	2.639703619577722
A9UF02_HUMAN	29221	Platelet count decreased	39241	612	9.112253157817658e-155	2.829251215744293e-153	3.666296787325168
A9UF02_HUMAN	29221	Platelet count increased	4925	150	1.4711399131211794e-74	2.316030313740609e-73	7.269550282187862
A9UF02_HUMAN	29221	Pleural effusion	26820	653	4.9330368786155107e-265	2.6277356485742058e-263	5.7749590441224745
A9UF02_HUMAN	29221	Pleural fibrosis	768	16	3.963739974638715e-07	1.062049917876788e-06	4.923702496091779
A9UF02_HUMAN	29221	Pleurisy	3091	33	5.196807637019369e-06	1.2474226600467619e-05	2.4972735681616576
A9UF02_HUMAN	29221	Pleuritic pain	1641	16	0.0033954859942040834	0.005478692643255395	2.2785380166529343
A9UF02_HUMAN	29221	Pneumatosis intestinalis	836	15	5.4492648106823025e-06	1.3048330819590991e-05	4.228027112965535
A9UF02_HUMAN	29221	Pneumocystis jiroveci pneumonia	2667	23	0.0025241048696377074	0.004176207364982844	2.0130568828574935
A9UF02_HUMAN	29221	Pneumonia cytomegaloviral	642	7	0.022632243262556386	0.030326462713498238	2.5510206633294414
A9UF02_HUMAN	29221	Pneumonia fungal	945	9	0.023116995751083516	0.03090680207863942	2.225134781887631
A9UF02_HUMAN	29221	Pneumonia klebsiella	641	7	0.02246606690810543	0.03013023638589399	2.5550443552274373
A9UF02_HUMAN	29221	Pneumoperitoneum	706	7	0.03510225875428515	0.04468027394267045	2.31745081718769
A9UF02_HUMAN	29221	Polyneuropathy	3193	37	1.4115645529070275e-07	3.933184218820309e-07	2.7130287201215477
A9UF02_HUMAN	29221	Polyp	2427	24	0.00024395725721039268	0.0004769979547641091	2.31125110927654
A9UF02_HUMAN	29221	Prostate cancer	7253	111	9.254894260604387e-29	6.63919143820606e-28	3.596605421746123
A9UF02_HUMAN	29221	Prostatic specific antigen increased	4026	42	3.7045204135675903e-07	9.950717879314983e-07	2.439605604238246
A9UF02_HUMAN	29221	Prostatomegaly	1495	16	0.0010122815724734502	0.0017962688897204856	2.5034646903725615
A9UF02_HUMAN	29221	Protein total decreased	2029	22	0.00011014397684919933	0.00022609140990081358	2.536675825091629
A9UF02_HUMAN	29221	Prothrombin level decreased	703	9	0.003915825108831829	0.006245230952132812	3.0010463340732314
A9UF02_HUMAN	29221	Pulmonary alveolar haemorrhage	1751	20	0.00011224378534278472	0.00023014349695847975	2.6737610319620293
A9UF02_HUMAN	29221	Pulmonary haemorrhage	3812	45	4.034288781892754e-09	1.2694162846178314e-08	2.764436097487155
A9UF02_HUMAN	29221	Pulmonary mass	3999	49	2.5773069685885913e-10	8.802742586562433e-10	2.870705531265662
A9UF02_HUMAN	29221	Pulmonary tuberculosis	2096	28	2.9027694177789774e-07	7.866707935085969e-07	3.133265224785678
A9UF02_HUMAN	29221	Rales	2666	35	1.6061510671490184e-08	4.828872917723894e-08	3.0784836967202494
A9UF02_HUMAN	29221	Rectal cancer	1350	25	2.7346690529418316e-09	8.715710465756313e-09	4.366302213515351
A9UF02_HUMAN	29221	Recurrent cancer	943	72	1.434676535782588e-63	1.962854697814481e-62	19.12951693085486
A9UF02_HUMAN	29221	Red blood cell count decreased	10715	195	3.0988611457744175e-60	4.050669727926781e-59	4.289518381813798
A9UF02_HUMAN	29221	Red blood cell count increased	843	8	0.03163198868326494	0.040753308123858724	2.2171402856652804
A9UF02_HUMAN	29221	Red cell distribution width increased	825	20	1.2172078351460953e-09	3.9741023530699924e-09	5.749416579287295
A9UF02_HUMAN	29221	Renal atrophy	578	7	0.013616806881132983	0.01926127238641471	2.8369494241929862
A9UF02_HUMAN	29221	Renal cell carcinoma	3313	34	6.478754380146468e-06	1.5391087071834835e-05	2.3995354037068197
A9UF02_HUMAN	29221	Renal colic	1100	11	0.009304251422363335	0.013685222283373419	2.3375153264274102
A9UF02_HUMAN	29221	Renal cyst	3681	39	7.29794556507656e-07	1.9085927895272338e-06	2.4780743205206566
A9UF02_HUMAN	29221	Renal failure chronic	10708	107	1.2439519971040657e-14	5.417745443807594e-14	2.335751330331625
A9UF02_HUMAN	29221	Renal neoplasm	731	12	0.00010493020454480189	0.00021606684751736743	3.8622645449176125
A9UF02_HUMAN	29221	Resuscitation	1044	10	0.016677250078247757	0.02312693933373663	2.238046589132627
A9UF02_HUMAN	29221	Retinal detachment	3678	32	0.00032521177958503514	0.0006243278938886898	2.0310610406259015
A9UF02_HUMAN	29221	Retinal haemorrhage	3485	41	2.08577555256476e-08	6.215538764310686e-08	2.7549287775751625
A9UF02_HUMAN	29221	Reversible posterior leukoencephalopathy syndrome	854	9	0.012961344986318582	0.018449229799404068	2.4647646814755295
A9UF02_HUMAN	29221	Rhonchi	725	7	0.03953368841979376	0.049569264010060766	2.256125517011414
A9UF02_HUMAN	29221	Right ventricular failure	3256	32	3.662133725444858e-05	7.990820802138944e-05	2.296913323238845
A9UF02_HUMAN	29221	Scleroderma	1492	21	3.7744451244470267e-06	9.19339215466316e-06	3.303667140477624
A9UF02_HUMAN	29221	Seborrhoeic dermatitis	565	6	0.03721945671381451	0.04699405281455837	2.483871384432704
A9UF02_HUMAN	29221	Sepsis	43866	422	6.5417774442148706e-49	7.180425246021791e-48	2.24787577818535
A9UF02_HUMAN	29221	Septic shock	15011	181	8.280020299445648e-33	6.580662894723855e-32	2.824405740677867
A9UF02_HUMAN	29221	Serum ferritin increased	2210	24	5.4120487471602015e-05	0.00011561766657349597	2.540684545101339
A9UF02_HUMAN	29221	Skin atrophy	1875	24	3.98773025616608e-06	9.687379394061215e-06	3.000505897132105
A9UF02_HUMAN	29221	Skin depigmentation	502	16	1.1772723118976838e-09	3.847259283091386e-09	7.618568471318967
A9UF02_HUMAN	29221	Skin erosion	778	12	0.00018559641588979973	0.0003692867225557613	3.6252848665741038
A9UF02_HUMAN	29221	Skin hyperpigmentation	2292	21	0.00186532710462607	0.0031617765675899883	2.1398918377994653
A9UF02_HUMAN	29221	Skin hypertrophy	1147	12	0.004836247720871752	0.007565150121962009	2.4466680244896595
A9UF02_HUMAN	29221	Skin lesion	9503	92	5.566520020597e-12	2.1024874881766925e-11	2.2622558275529543
A9UF02_HUMAN	29221	Skin oedema	519	11	2.1123906696222406e-05	4.741823454960044e-05	5.010933445825688
A9UF02_HUMAN	29221	Skin swelling	996	9	0.04444514923496819	0.05483488223168407	2.1101582126107625
A9UF02_HUMAN	29221	Skin tightness	1627	15	0.006505040067061398	0.009900899937270927	2.153356240536417
A9UF02_HUMAN	29221	Skin toxicity	1336	16	0.000310666132625386	0.0005980096115384112	2.8050183917128924
A9UF02_HUMAN	29221	Small cell lung cancer stage unspecified	731	7	0.04100540737437468	0.051171348972188085	2.2374283442185017
A9UF02_HUMAN	29221	Small intestinal haemorrhage	857	12	0.0004392749559457186	0.000826162195945981	3.286352908634039
A9UF02_HUMAN	29221	Small intestinal perforation	709	8	0.012834182426335243	0.01829463292532658	2.6409588281462324
A9UF02_HUMAN	29221	Spinal cord disorder	795	8	0.023517855470370854	0.03137480616536722	2.352366122656301
A9UF02_HUMAN	29221	Spleen disorder	773	12	0.0001750554814325936	0.0003495583752478125	3.649104083831489
A9UF02_HUMAN	29221	Splenectomy	689	12	6.0427254610831295e-05	0.00012830428553078926	4.101873275916932
A9UF02_HUMAN	29221	Splenic infarction	750	7	0.04589854555913187	0.0564272978128762	2.1802128145547717
A9UF02_HUMAN	29221	Splenic rupture	743	10	0.0016996642712564462	0.0028990300754771375	3.1570807273712633
A9UF02_HUMAN	29221	Splenomegaly	4718	204	1.0266811623706469e-128	2.6582044276975206e-127	10.458232063032339
A9UF02_HUMAN	29221	Squamous cell carcinoma	3445	36	2.499448267998383e-06	6.202080869618643e-06	2.4437971907853595
A9UF02_HUMAN	29221	Stem cell transplant	1540	58	1.1088633995397614e-34	9.199499402540703e-34	9.056688936805795
A9UF02_HUMAN	29221	Subdural haematoma	5846	97	7.067077977481941e-28	4.94599077424808e-27	3.90453290653721
A9UF02_HUMAN	29221	Subdural haemorrhage	1128	17	1.286604155288163e-05	2.9595044251635295e-05	3.5409885637959775
A9UF02_HUMAN	29221	Subileus	1053	13	0.0008277796006908763	0.0014886206816668481	2.8926752164539202
A9UF02_HUMAN	29221	Surgery	17928	210	4.48601070374879e-36	3.8412968772162884e-35	2.742800747060947
A9UF02_HUMAN	29221	Systemic candida	686	10	0.0009457288529344239	0.0016855517058867898	3.423284279827125
A9UF02_HUMAN	29221	Tachyarrhythmia	1255	11	0.026701758667953518	0.03508951205373923	2.0462654264304256
A9UF02_HUMAN	29221	Terminal state	2386	36	2.864839545754336e-10	9.757125181875832e-10	3.5450657971860813
A9UF02_HUMAN	29221	Therapeutic response decreased	22464	238	4.002536312470192e-34	3.2787512168753744e-33	2.4780228615712514
A9UF02_HUMAN	29221	Thrombocytopenia	41520	593	1.3657192086641774e-133	3.6654884434320645e-132	3.3530068724454267
A9UF02_HUMAN	29221	Thrombocytosis	1702	77	4.204880726841138e-51	4.780341953932322e-50	10.965464205142245
A9UF02_HUMAN	29221	Thrombotic microangiopathy	2500	25	0.0001574987922993367	0.0003164188475331775	2.3375153264274102
A9UF02_HUMAN	29221	Thyroid cancer	3276	33	1.222036656183211e-05	2.8177478323719484e-05	2.3548142372612855
A9UF02_HUMAN	29221	Thyroid mass	520	5	0.07617011524859743	0.087276610196746	2.2467380321972192
A9UF02_HUMAN	29221	Tinea pedis	759	9	0.0063539742283897855	0.009694873137923775	2.7769682077957634
A9UF02_HUMAN	29221	Tongue neoplasm malignant stage unspecified	620	9	0.0017147760901773835	0.0029230399390967774	3.408717112678924
A9UF02_HUMAN	29221	Toxic skin eruption	4103	40	3.5797082405338256e-06	8.741188043483149e-06	2.2782576157156154
A9UF02_HUMAN	29221	Tracheostomy	606	8	0.005306938887344193	0.008238570155825142	3.0958396965393127
A9UF02_HUMAN	29221	Transplant	927	15	1.810711926607177e-05	4.096537238586496e-05	3.8061516005972633
A9UF02_HUMAN	29221	Treatment failure	5725	106	3.5994822434177974e-34	2.9513246437032852e-33	4.365525153146332
A9UF02_HUMAN	29221	Troponin I increased	679	6	0.07577452613282772	0.08691627397050655	2.063126454528799
A9UF02_HUMAN	29221	Troponin increased	2521	25	0.00017392493950576339	0.00034744731970216526	2.317848731132949
A9UF02_HUMAN	29221	Tuberculosis	4926	78	1.4340935572355907e-21	8.264580491168689e-21	3.723245328109006
A9UF02_HUMAN	29221	Tumour haemorrhage	925	64	5.0889923578416695e-54	6.069701595362724e-53	17.201506513640037
A9UF02_HUMAN	29221	Tumour lysis syndrome	2415	60	2.5642136529642846e-26	1.71478513577715e-25	5.895898530351939
A9UF02_HUMAN	29221	Tumour marker increased	878	8	0.06131445276471395	0.0724717961794045	2.127944986816677
A9UF02_HUMAN	29221	Twin pregnancy	545	7	0.01014561492381606	0.014791597413303373	3.0109630505840057
A9UF02_HUMAN	29221	Urinary bladder haemorrhage	858	9	0.01332148118806563	0.01889665783100141	2.4531521270280594
A9UF02_HUMAN	29221	Urine colour abnormal	615	6	0.05210545429826929	0.06303339214660757	2.2799410573035823
A9UF02_HUMAN	29221	Urine output decreased	4475	42	5.469749029535758e-06	1.3094998845633695e-05	2.1925081721825337
A9UF02_HUMAN	29221	Uterine cancer	1460	15	0.0021032617694854215	0.0035326655033477684	2.4022216330413175
A9UF02_HUMAN	29221	Uterine dilation and curettage	560	7	0.011632354684030404	0.016735540404721888	2.9292913584343494
A9UF02_HUMAN	29221	VIth nerve paralysis	571	6	0.03884177681395157	0.04880245438565416	2.4574939891997905
A9UF02_HUMAN	29221	Vascular calcification	789	8	0.022618287395419465	0.030309845612198964	2.3704380775038527
A9UF02_HUMAN	29221	Vascular occlusion	1086	10	0.030435385718300855	0.03941659503457655	2.15068789327429
A9UF02_HUMAN	29221	Ventricular hypokinesia	1778	21	4.8387905660357814e-05	0.00010403940617021116	2.765904589438011
A9UF02_HUMAN	29221	Vitreous detachment	880	8	0.06154839145410619	0.0727153580703311	2.123064379048749
A9UF02_HUMAN	29221	Vitreous haemorrhage	1224	13	0.0030477196866113346	0.004967709018136726	2.48421323295795
A9UF02_HUMAN	29221	Walking disability	763	8	0.018999050568379715	0.02593634639928113	2.452069057656303
A9UF02_HUMAN	29221	White blood cell count abnormal	1528	23	4.3726175476986787e-07	1.167181305873197e-06	3.536559733073231
A9UF02_HUMAN	29221	White blood cell count decreased	36790	480	3.1919276833558064e-95	6.214808474320577e-94	3.0591773151151345
A9UF02_HUMAN	29221	White blood cell count increased	19468	419	8.422283607296773e-152	2.5604425489683314e-150	5.090160809256937
A9UF02_HUMAN	29221	White blood cell disorder	900	16	3.0266746582838263e-06	7.442398615526586e-06	4.188489001200247
A9UF02_HUMAN	29221	Wound complication	1160	11	0.02005604804607878	0.027232022489432395	2.2154518629063964
A9UF02_HUMAN	29221	Yellow skin	2016	21	0.0002636651460364329	0.000513056972740477	2.4359370243822487
KCNK1_HUMAN	1423	Abdominal adhesions	1545	1	0.2766018735148338	0.24971803982468282	3.090396393083284
KCNK1_HUMAN	1423	Abdominal hernia	1888	1	0.32678480857211906	0.2845361461178578	2.528655024335236
KCNK1_HUMAN	1423	Abdominal mass	1075	1	0.20171279367416364	0.19474858281580662	4.442804498063865
KCNK1_HUMAN	1423	Abdominal rigidity	1085	1	0.20338414172077615	0.19598127557756032	4.401819216716412
KCNK1_HUMAN	1423	Abdominal wall haematoma	733	1	0.14239385463740498	0.14725679395213911	6.518541025847801
KCNK1_HUMAN	1423	Abnormal behaviour	22907	13	0.0013879619802613509	0.0024061963321035103	2.709462584169113
KCNK1_HUMAN	1423	Accidental overdose	12741	7	0.019370559621534583	0.02639222293529686	2.6229781856796084
KCNK1_HUMAN	1423	Acidosis	3652	2	0.17872761347501806	0.17706644843720096	2.6145600169427894
KCNK1_HUMAN	1423	Activities of daily living impaired	18898	16	4.101508000287594e-06	9.952450702108468e-06	4.043276797729555
KCNK1_HUMAN	1423	Acute myocardial infarction	16701	8	0.026534759485879852	0.03489113089125511	2.2867415232351718
KCNK1_HUMAN	1423	Acute prerenal failure	1168	1	0.21712203076209258	0.20634994625004427	4.088750669169315
KCNK1_HUMAN	1423	Acute psychosis	1090	1	0.2042185027239322	0.19660144867698695	4.38160884382056
KCNK1_HUMAN	1423	Acute respiratory failure	5893	4	0.03677644433864281	0.046510177039601516	3.2410066435188254
KCNK1_HUMAN	1423	Acute sinusitis	929	1	0.17690829000584074	0.17564768760640656	5.1417802057333954
KCNK1_HUMAN	1423	Adhesion	892	1	0.17050082516209988	0.17031743669606847	5.3552996980029075
KCNK1_HUMAN	1423	Affect lability	3286	15	1.3499975732923399e-15	6.1575566174704114e-15	21.8812535811094
KCNK1_HUMAN	1423	Aggression	25619	26	1.1666602366355925e-10	4.069899488940854e-10	4.847453319420754
KCNK1_HUMAN	1423	Agitation	35271	31	6.764282307086226e-11	2.394643238625814e-10	4.197466883045922
KCNK1_HUMAN	1423	Agoraphobia	591	1	0.1164884892376865	0.12471596015031836	8.087410221899306
KCNK1_HUMAN	1423	Alcohol abuse	1090	4	9.369416185424717e-05	0.00019426787182682997	17.574850942617275
KCNK1_HUMAN	1423	Alcohol use	3207	2	0.14608218022138936	0.15013513688908967	2.977580050496468
KCNK1_HUMAN	1423	Alcoholism	1478	2	0.03907967037292963	0.04905982408592728	6.465544757344973
KCNK1_HUMAN	1423	Amyotrophic lateral sclerosis	851	3	0.000823056612929865	0.0014808680006162726	16.880561430143597
KCNK1_HUMAN	1423	Anal fissure	1336	1	0.2442085299295848	0.22670481675849458	3.574211259116547
KCNK1_HUMAN	1423	Anal haemorrhage	1048	1	0.1971826385171282	0.19162238955637548	4.557375387698749
KCNK1_HUMAN	1423	Anal pruritus	1536	1	0.2752359635840198	0.24901934810574322	3.108515981055759
KCNK1_HUMAN	1423	Anger	16280	13	5.7063828963496e-05	0.00012152701771745469	3.8132683593758943
KCNK1_HUMAN	1423	Angina pectoris	15254	8	0.01659483595856737	0.023023612901269135	2.503776482183177
KCNK1_HUMAN	1423	Angina unstable	4590	6	0.00048090130039586573	0.0008993316645107329	6.245513129477211
KCNK1_HUMAN	1423	Angioplasty	973	4	6.061821200341735e-05	0.00012869114403885368	19.69689176850605
KCNK1_HUMAN	1423	Anhedonia	10520	6	0.024995525956387196	0.03310760067505899	2.7229819465021436
KCNK1_HUMAN	1423	Anorgasmia	1158	2	0.025053865580081762	0.03317715784093287	8.255314932388565
KCNK1_HUMAN	1423	Antibody test positive	949	1	0.1803511633704408	0.17839056607096104	5.033303830085011
KCNK1_HUMAN	1423	Anxiety disorder	1387	1	0.2522444019239606	0.23285566781096634	3.4426926630018686
KCNK1_HUMAN	1423	Aortic arteriosclerosis	1523	2	0.041243591288272125	0.05142405984109795	6.274256450914648
KCNK1_HUMAN	1423	Aortic disorder	506	1	0.10060912497209103	0.1106831809034136	9.448657486971467
KCNK1_HUMAN	1423	Aortic stenosis	1800	1	0.3142516946846298	0.27565599858590195	2.652346876553969
KCNK1_HUMAN	1423	Aortic valve incompetence	2613	4	0.002414565810580324	0.0040086586439235464	7.315556965765566
KCNK1_HUMAN	1423	Aortic valve sclerosis	584	2	0.0068890542278921725	0.010429558967285238	16.397154745431582
KCNK1_HUMAN	1423	Aphasia	13508	16	5.372833933212695e-08	1.5497975438039938e-07	5.658549695725574
KCNK1_HUMAN	1423	Aplasia pure red cell	1773	4	0.0005870508672324736	0.001081828135384612	10.789309284161877
KCNK1_HUMAN	1423	Apnoea	4105	4	0.01154052703156905	0.016616798694013078	4.654057089412914
KCNK1_HUMAN	1423	Appetite disorder	1826	1	0.3179787364090991	0.2783530202898222	2.6145600169427894
KCNK1_HUMAN	1423	Apraxia	611	2	0.007513295708064834	0.011286395705892032	15.67018729366368
KCNK1_HUMAN	1423	Areflexia	1468	1	0.26483213620127233	0.24180513660613193	3.2526053380508455
KCNK1_HUMAN	1423	Arrhythmia	21966	23	7.517871152415075e-10	2.4892810346906304e-09	5.001419892957826
KCNK1_HUMAN	1423	Arteriosclerosis	5826	7	0.0002746525082874517	0.0005330157990820788	5.739990413549429
KCNK1_HUMAN	1423	Arteriosclerosis coronary artery	4446	4	0.015028847285594582	0.021063101301672008	4.296778055759199
KCNK1_HUMAN	1423	Asphyxia	2964	2	0.12883903097462068	0.1358870184947894	3.2218582247944565
KCNK1_HUMAN	1423	Asthenia	144412	76	1.0810442875188746e-12	4.25572197378225e-12	2.512467259380646
KCNK1_HUMAN	1423	Asthenopia	1656	2	0.04789266616611151	0.05859454669120438	5.769736434003132
KCNK1_HUMAN	1423	Asthma	29308	13	0.012482522561678732	0.01784877117273267	2.1174410787495366
KCNK1_HUMAN	1423	Ataxia	5246	5	0.005390191533074886	0.008354660518904137	4.552158014616094
KCNK1_HUMAN	1423	Atelectasis	5864	6	0.0016739093093951283	0.0028583762790810176	4.8872366311921365
KCNK1_HUMAN	1423	Atrial fibrillation	37254	43	1.2384219588256259e-18	6.423157291506817e-18	5.513896356711332
KCNK1_HUMAN	1423	Atrial flutter	3608	10	8.15465649399205e-09	2.508761650960962e-08	13.261734382769845
KCNK1_HUMAN	1423	Atrial tachycardia	845	3	0.0008065017371409261	0.0014532485653209815	17.000850466462907
KCNK1_HUMAN	1423	Atrioventricular block complete	3117	6	6.104502461237733e-05	0.00012955764538866366	9.20264615413807
KCNK1_HUMAN	1423	Atrioventricular block first degree	2330	5	0.00015283736396965142	0.0003076147821395964	10.261445227786215
KCNK1_HUMAN	1423	Atrioventricular block second degree	1555	1	0.2781165337036669	0.2506737433696648	3.070509672407072
KCNK1_HUMAN	1423	Atrophy	1088	1	0.203884861390522	0.1963430195027684	4.389670681619679
KCNK1_HUMAN	1423	Attention deficit/hyperactivity disorder	2231	1	0.3734887739479993	0.31575771243035483	2.1397183995159597
KCNK1_HUMAN	1423	Azotaemia	1961	1	0.3370077159075223	0.2916480624647832	2.434475525979893
KCNK1_HUMAN	1423	Back injury	3965	2	0.20229101765768243	0.19517608511984544	2.4080605757863185
KCNK1_HUMAN	1423	Bacteraemia	3883	2	0.19608101957831275	0.19083936859366082	2.4589394645300646
KCNK1_HUMAN	1423	Balance disorder	35264	24	8.93553650449552e-07	2.317504295670219e-06	3.2496517804226492
KCNK1_HUMAN	1423	Basal cell carcinoma	5070	3	0.09202674747908528	0.10271452174980905	2.825087052054819
KCNK1_HUMAN	1423	Basedow's disease	1021	1	0.19262679268620347	0.18809495122119538	4.678011795020186
KCNK1_HUMAN	1423	Bedridden	5376	5	0.005959818245200901	0.009150004249574026	4.44197731420647
KCNK1_HUMAN	1423	Benign breast neoplasm	548	2	0.006095448153049257	0.009334198090495573	17.47828582754795
KCNK1_HUMAN	1423	Benign prostatic hyperplasia	2723	2	0.11226069284911902	0.12085813561779277	3.5072194273580233
KCNK1_HUMAN	1423	Bladder operation	508	1	0.10098601261614434	0.11098715872823198	9.411384676371974
KCNK1_HUMAN	1423	Blepharospasm	1840	1	0.3199772083895101	0.27976375298458217	2.594655808004671
KCNK1_HUMAN	1423	Blood albumin decreased	4562	4	0.01635098589169785	0.022719779412129496	4.187426091198412
KCNK1_HUMAN	1423	Blood albumin increased	508	1	0.10098601261614434	0.11098715872823198	9.411384676371974
KCNK1_HUMAN	1423	Blood blister	1304	3	0.002763770663129121	0.004538924281847646	11.002856335712352
KCNK1_HUMAN	1423	Blood chloride decreased	1838	3	0.007132336168526394	0.010764273644275913	7.800935200415133
KCNK1_HUMAN	1423	Blood chloride increased	875	1	0.16754016683790163	0.1679039597545051	5.459464566270698
KCNK1_HUMAN	1423	Blood creatine increased	2130	1	0.36008312576097806	0.30655046671177244	2.2412268815972713
KCNK1_HUMAN	1423	Blood creatine phosphokinase MB increased	1062	2	0.02134889793277034	0.02880392595758774	9.002966096076586
KCNK1_HUMAN	1423	Blood electrolytes abnormal	665	2	0.008835150533617912	0.013071846157196199	14.393882446215958
KCNK1_HUMAN	1423	Blood glucose abnormal	6127	3	0.13908093914019862	0.144724388217477	2.3374781340238027
KCNK1_HUMAN	1423	Blood magnesium decreased	2833	4	0.0032187384668854115	0.005217990239081724	6.7466553989686675
KCNK1_HUMAN	1423	Blood potassium increased	7111	4	0.06427223323979812	0.07552285807384324	2.685561857841897
KCNK1_HUMAN	1423	Blood pressure abnormal	5282	3	0.10085559587132023	0.11089432032940576	2.7116340391668436
KCNK1_HUMAN	1423	Blood pressure immeasurable	1071	1	0.20104327585310158	0.19427560829577203	4.459413113009897
KCNK1_HUMAN	1423	Blood pressure inadequately controlled	4106	2	0.213018889019097	0.2031839317994498	2.3253275004486307
KCNK1_HUMAN	1423	Blood pressure systolic decreased	1821	1	0.3172635721168575	0.2778255793650047	2.6217428741321926
KCNK1_HUMAN	1423	Blood pressure systolic increased	5863	6	0.0016724886935162201	0.002856219853187425	4.888071057798111
KCNK1_HUMAN	1423	Blood sodium decreased	8731	4	0.11333653491894741	0.12186177108391182	2.187038859136285
KCNK1_HUMAN	1423	Blood sodium increased	1340	2	0.032729109235100154	0.041977992786351594	7.132394665053199
KCNK1_HUMAN	1423	Blood thyroid stimulating hormone abnormal	559	1	0.11054352815867463	0.11927637934544404	8.551204356488514
KCNK1_HUMAN	1423	Blood thyroid stimulating hormone decreased	1426	1	0.25833182645401387	0.23705828594938927	3.3484716006460284
KCNK1_HUMAN	1423	Blood urea increased	10874	7	0.008858099777153997	0.013102969934192242	3.0736177617046225
KCNK1_HUMAN	1423	Blood uric acid increased	2340	1	0.3876415818589756	0.3241456635822459	2.0400051436171824
KCNK1_HUMAN	1423	Blood urine	612	1	0.12036827122029259	0.12826590493270884	7.809446859117169
KCNK1_HUMAN	1423	Bone neoplasm malignant	1178	1	0.2187611373581576	0.20761460572644305	4.0540119209180885
KCNK1_HUMAN	1423	Bowel movement irregularity	1721	1	0.30280188832652577	0.26785494597058074	2.7741697854189478
KCNK1_HUMAN	1423	Bradyarrhythmia	761	1	0.14741165093726416	0.15119171497844267	6.278384251211303
KCNK1_HUMAN	1423	Bradycardia	21589	17	5.331077770906071e-06	1.2779336525791902e-05	3.7602783481202495
KCNK1_HUMAN	1423	Brain death	1498	2	0.04003591225953171	0.05012482857502184	6.379106993209346
KCNK1_HUMAN	1423	Brain natriuretic peptide increased	1208	4	0.0001386787812157221	0.00028082455399726705	15.852398773822559
KCNK1_HUMAN	1423	Breast cancer recurrent	1269	2	0.029636871235027513	0.0385277446518349	7.532078975407403
KCNK1_HUMAN	1423	Breast discomfort	508	1	0.10098601261614434	0.11098715872823198	9.411384676371974
KCNK1_HUMAN	1423	Breath sounds abnormal	1751	4	0.0005604595080068007	0.0010365465166149623	10.925179235078629
KCNK1_HUMAN	1423	Bronchial hyperreactivity	570	3	0.00025793257740283404	0.0005025900037122072	25.246412862013702
KCNK1_HUMAN	1423	Bronchitis	31471	17	0.00048502897612599116	0.0009065624824762237	2.578900124806067
KCNK1_HUMAN	1423	Bruxism	2289	1	0.38105984344461336	0.32071849881991477	2.0854772862415167
KCNK1_HUMAN	1423	Bundle branch block	573	5	1.8378506311649185e-07	5.068715223662724e-07	42.00327492007562
KCNK1_HUMAN	1423	Bundle branch block left	2317	6	1.1845907250627776e-05	2.735138418119628e-05	12.38833067309543
KCNK1_HUMAN	1423	Bundle branch block right	2699	7	2.2000369189349884e-06	5.49033261960305e-06	12.407505280997077
KCNK1_HUMAN	1423	Bursitis	4257	4	0.013023138280194633	0.018525143420875027	4.487723518382874
KCNK1_HUMAN	1423	CD4 lymphocytes decreased	1068	1	0.20054076685172423	0.19389308827927387	4.471951294208613
KCNK1_HUMAN	1423	Calcinosis	1239	1	0.22868568679270002	0.21534730847686534	3.854258506397892
KCNK1_HUMAN	1423	Candidiasis	4547	3	0.07173565740348344	0.08312409527684105	3.150245619005671
KCNK1_HUMAN	1423	Cardiac arrest	40759	21	0.00021204999511772885	0.0004181965159232249	2.459693962622917
KCNK1_HUMAN	1423	Cardiac death	780	1	0.15079986565064332	0.15396180415197597	6.125252928011028
KCNK1_HUMAN	1423	Cardiac failure chronic	962	2	0.017757628277019755	0.024454055413823988	9.940775064417897
KCNK1_HUMAN	1423	Cardiac failure congestive	55736	29	1.2542672594202633e-05	2.888195230866763e-05	2.4839892454574315
KCNK1_HUMAN	1423	Cardiac fibrillation	725	1	0.14095478606832368	0.14626934019972126	6.590569103481478
KCNK1_HUMAN	1423	Cardiac flutter	2515	3	0.016480350241480635	0.022881059472580165	5.698533476417902
KCNK1_HUMAN	1423	Cardiac murmur	5430	11	3.524503460008072e-08	1.0315680351173807e-07	9.685789322776618
KCNK1_HUMAN	1423	Cardiac pacemaker insertion	2899	2	0.12431238500664282	0.13180539500393643	3.294147070017667
KCNK1_HUMAN	1423	Cardiac stress test abnormal	556	1	0.10998413885365049	0.11875777821870585	8.597427082739802
KCNK1_HUMAN	1423	Cardiac tamponade	1843	1	0.3204046993074217	0.28004894838667527	2.5904299842131326
KCNK1_HUMAN	1423	Cardiac valve disease	2957	5	0.000452224885239881	0.0008490165544269728	8.081930946681215
KCNK1_HUMAN	1423	Cardioactive drug level increased	1036	16	7.788060498289264e-25	4.989011646044707e-24	74.84818872032298
KCNK1_HUMAN	1423	Cardiomegaly	8134	15	4.319924386003064e-10	1.4537011240724278e-09	8.815566013524924
KCNK1_HUMAN	1423	Cardiomyopathy	7484	10	5.851093016265238e-06	1.3965157142800223e-05	6.384228031737476
KCNK1_HUMAN	1423	Cardioversion	653	2	0.00853303805446577	0.0126628224010406	14.659207468266022
KCNK1_HUMAN	1423	Carotid artery disease	857	1	0.16439384505756413	0.16531971373196588	5.574266391262372
KCNK1_HUMAN	1423	Carotid artery stenosis	2363	3	0.013989137039434753	0.019729963280271514	6.065557666424479
KCNK1_HUMAN	1423	Carpal tunnel syndrome	5448	3	0.10799512357496244	0.11696588755928983	2.628965306292336
KCNK1_HUMAN	1423	Cataplexy	567	1	0.1120335045898597	0.12064955227573972	8.430339277244858
KCNK1_HUMAN	1423	Cataract operation	2902	2	0.1245204443028429	0.13199162077408544	3.2907393316693727
KCNK1_HUMAN	1423	Catatonia	1823	7	1.6476051619127388e-07	4.563131758356282e-07	18.392623467204917
KCNK1_HUMAN	1423	Catheterisation cardiac	1933	2	0.06286398237132906	0.07408708243487343	4.942073569052916
KCNK1_HUMAN	1423	Cellulitis	19973	10	0.01075126462258682	0.015586208060866956	2.390207900075435
KCNK1_HUMAN	1423	Central nervous system lesion	6484	6	0.0027464089712656375	0.004512670266454982	4.419486289830741
KCNK1_HUMAN	1423	Cerebral artery embolism	686	1	0.13390469457173715	0.14033362362235235	6.965798585285533
KCNK1_HUMAN	1423	Cerebral artery occlusion	647	1	0.12679678304676603	0.13403412328027348	7.386334413189768
KCNK1_HUMAN	1423	Cerebral atrophy	2480	2	0.0961735530011926	0.10662447664372805	3.8511477247139547
KCNK1_HUMAN	1423	Cerebral disorder	1738	1	0.30528179329862315	0.2694773512474894	2.7470190160740304
KCNK1_HUMAN	1423	Cerebral ischaemia	3168	2	0.14328304788331428	0.14792555325239942	3.0142590214280416
KCNK1_HUMAN	1423	Cervicobrachial syndrome	601	1	0.11833813035153577	0.12641560357827256	7.952620051534317
KCNK1_HUMAN	1423	Change of bowel habit	1086	2	0.022251972141904476	0.029873812896670852	8.803638433432823
KCNK1_HUMAN	1423	Chapped lips	1841	1	0.32011973547153655	0.27985605492350346	2.5932456689785814
KCNK1_HUMAN	1423	Chemotherapy	641	1	0.12569809422663514	0.13303666534602193	7.455581298313422
KCNK1_HUMAN	1423	Chest X-ray abnormal	2115	2	0.07344275303942571	0.08469193552803984	4.516395675267951
KCNK1_HUMAN	1423	Chest injury	530	1	0.10512138536596229	0.11445084532468273	9.019984935577675
KCNK1_HUMAN	1423	Chest pain	87901	39	1.8740650437768425e-05	4.2326216370422e-05	2.1179953700792495
KCNK1_HUMAN	1423	Choking	6723	5	0.01453615266747815	0.020435133514121663	3.551333753290108
KCNK1_HUMAN	1423	Choking sensation	2221	2	0.0798475040928709	0.09076713785221091	4.300650771447129
KCNK1_HUMAN	1423	Chronic fatigue syndrome	573	1	0.11314935091486839	0.12168704268391972	8.341909144966067
KCNK1_HUMAN	1423	Chronic obstructive pulmonary disease	21985	11	0.007743793332354428	0.011599475884324481	2.3886089169075495
KCNK1_HUMAN	1423	Chronic sinusitis	1138	2	0.024261787620452762	0.03224075216569839	8.400654984015123
KCNK1_HUMAN	1423	Circumstance or information capable of leading to medication error	5132	3	0.0945743301186434	0.10514724372597856	2.790937042846904
KCNK1_HUMAN	1423	Claustrophobia	509	1	0.10117439734694174	0.11113275396068277	9.39285832858384
KCNK1_HUMAN	1423	Clostridial infection	7774	7	0.0014621626149764473	0.002525012656467323	4.300373917399785
KCNK1_HUMAN	1423	Clostridium colitis	965	1	0.18309510423185762	0.18063778754668633	4.94976351755248
KCNK1_HUMAN	1423	Clostridium difficile colitis	4052	6	0.00025009074848688793	0.00048819670393835963	7.0759842277616265
KCNK1_HUMAN	1423	Clumsiness	1133	1	0.21135805202911145	0.20198009887830465	4.215169638622429
KCNK1_HUMAN	1423	Cognitive disorder	16735	12	0.00028641295424532305	0.0005543344078710979	3.4239588812442188
KCNK1_HUMAN	1423	Coma	19846	15	2.9586909704192903e-05	6.527640717382543e-05	3.6091765651660963
KCNK1_HUMAN	1423	Communication disorder	1690	1	0.29825691107712005	0.2649118304769433	2.8250870520548195
KCNK1_HUMAN	1423	Compression fracture	2054	1	0.34980702594348734	0.29961952032380007	2.3241948518853337
KCNK1_HUMAN	1423	Computerised tomogram abnormal	1590	1	0.28339292257267107	0.254324522742211	3.00287730076815
KCNK1_HUMAN	1423	Concussion	2637	2	0.1064896046777565	0.11561214586706536	3.6216865509833704
KCNK1_HUMAN	1423	Condition aggravated	75043	44	2.8512031389272305e-09	9.074109420947384e-09	2.799359582934519
KCNK1_HUMAN	1423	Conduction disorder	974	4	6.085807822560148e-05	0.00012917710993489323	19.676585694517897
KCNK1_HUMAN	1423	Confusional state	65926	32	1.8667417949344593e-05	4.217049603175111e-05	2.31721105092207
KCNK1_HUMAN	1423	Congestive cardiomyopathy	2373	2	0.08931843055644757	0.10010763325078118	4.024944775133354
KCNK1_HUMAN	1423	Conjunctival hyperaemia	1341	1	0.24500015945701556	0.2273208431113139	3.560874649940739
KCNK1_HUMAN	1423	Continuous haemodiafiltration	988	1	0.18702343885310446	0.18386528643602087	4.83441948421539
KCNK1_HUMAN	1423	Contusion	36286	20	0.0001252167881464231	0.0002552280980961486	2.631430006573976
KCNK1_HUMAN	1423	Convulsion	76740	44	5.446717337859378e-09	1.6973253627783988e-08	2.7374200657205847
KCNK1_HUMAN	1423	Corneal oedema	842	1	0.16176282983374257	0.1631617141550269	5.673688502878229
KCNK1_HUMAN	1423	Coronary arterial stent insertion	3605	5	0.0010907952310791947	0.0019247610687883566	6.627183376278597
KCNK1_HUMAN	1423	Coronary artery disease	23294	10	0.034985783004026015	0.04454834958976384	2.0492922311117465
KCNK1_HUMAN	1423	Coronary artery occlusion	8868	5	0.04063272017745167	0.05078169196377318	2.691849278416219
KCNK1_HUMAN	1423	Coronary artery stenosis	3661	5	0.001167028432960647	0.002047262089882416	6.5256729088082475
KCNK1_HUMAN	1423	Creatinine renal clearance decreased	2045	1	0.34857925957967834	0.2988120430647429	2.334428586556062
KCNK1_HUMAN	1423	Crepitations	1455	2	0.03799099994411622	0.04784974059048009	6.567889925561722
KCNK1_HUMAN	1423	Crying	18791	26	1.4129907960347845e-13	5.834628625407639e-13	6.6112908501963945
KCNK1_HUMAN	1423	Culture urine positive	1135	2	0.024143882686105834	0.03210344423802628	8.422898554140495
KCNK1_HUMAN	1423	Daydreaming	543	2	0.0059887602738701706	0.009188999024335912	17.639822665140812
KCNK1_HUMAN	1423	Decreased activity	3284	2	0.15164124808102042	0.15464390145054743	2.9077221395006645
KCNK1_HUMAN	1423	Decubitus ulcer	3688	2	0.18141677056395208	0.17924556081725304	2.589024433489197
KCNK1_HUMAN	1423	Defaecation urgency	1590	1	0.28339292257267107	0.254324522742211	3.00287730076815
KCNK1_HUMAN	1423	Delirium	12760	8	0.00620047688891477	0.009480801851831753	2.9934579867757782
KCNK1_HUMAN	1423	Delusion	5926	4	0.03740977321507701	0.04720283828549315	3.22294632281026
KCNK1_HUMAN	1423	Dementia	7944	5	0.0273150663225079	0.035805107432748715	3.0051467633962656
KCNK1_HUMAN	1423	Demyelination	1977	1	0.33922754320630105	0.2932169243353062	2.414763173542809
KCNK1_HUMAN	1423	Depression	107205	55	3.497254677993693e-09	1.1053168906831239e-08	2.4492436929597057
KCNK1_HUMAN	1423	Depressive symptom	1192	1	0.22105012641407346	0.20941662286445828	4.00635770858152
KCNK1_HUMAN	1423	Dermatitis bullous	3031	2	0.1335445579493945	0.1400314740422687	3.15059229509448
KCNK1_HUMAN	1423	Diabetes mellitus inadequate control	7146	3	0.19039753096420312	0.1864311870628866	2.0040201725831963
KCNK1_HUMAN	1423	Diabetic complication	1638	1	0.2905665000440109	0.25942245168263756	2.914827141674154
KCNK1_HUMAN	1423	Diabetic retinopathy	1552	2	0.04266150907010977	0.05291604223194554	6.156867136671729
KCNK1_HUMAN	1423	Dialysis	7528	5	0.022369483154061634	0.03001468092946942	3.1713226312113454
KCNK1_HUMAN	1423	Diarrhoea	196036	98	1.1496862918017788e-14	5.016524996630966e-14	2.3865409416765395
KCNK1_HUMAN	1423	Diastolic dysfunction	1518	3	0.004219563243151585	0.0066889389144485145	9.448657486971465
KCNK1_HUMAN	1423	Dilatation atrial	1193	2	0.02646505981033335	0.034810995312052714	8.01271541716304
KCNK1_HUMAN	1423	Dilatation ventricular	2111	4	0.0011164205768362282	0.0019659847155312567	9.058513585041462
KCNK1_HUMAN	1423	Diplopia	10786	8	0.002302285895916382	0.003836198834066147	3.541712400015283
KCNK1_HUMAN	1423	Disorientation	19915	9	0.04206174514488871	0.05229092528522198	2.157346944553668
KCNK1_HUMAN	1423	Disturbance in attention	22736	12	0.003697289419485988	0.0059237308024031226	2.519752876740322
KCNK1_HUMAN	1423	Dizziness	194627	100	1.1115979833486715e-15	5.089918439079693e-15	2.4529098947295696
KCNK1_HUMAN	1423	Drug effect decreased	51198	26	7.189965524010119e-05	0.00015125275979837485	2.424389760101918
KCNK1_HUMAN	1423	Drug hypersensitivity	47950	31	7.550157583242098e-08	2.151342261573627e-07	3.0868493282109037
KCNK1_HUMAN	1423	Drug ineffective for unapproved indication	9609	6	0.0169620733246059	0.02347551074437481	2.9813008628057416
KCNK1_HUMAN	1423	Drug interaction	62757	42	1.4560725591472845e-10	5.05021499211011e-10	3.1955038714608115
KCNK1_HUMAN	1423	Drug level above therapeutic	1228	4	0.00014761527042973443	0.0002977806575892507	15.593372650067288
KCNK1_HUMAN	1423	Drug level below therapeutic	1172	2	0.025614537211234335	0.033837403821471386	8.156533386189043
KCNK1_HUMAN	1423	Drug level increased	6259	3	0.1454425797792991	0.1496407245965758	2.288157943216395
KCNK1_HUMAN	1423	Drug tolerance	1692	1	0.2985510282064801	0.2651149947653999	2.8217457308814846
KCNK1_HUMAN	1423	Duodenal ulcer	3359	2	0.15709527982448124	0.15924777819815158	2.8427596252133394
KCNK1_HUMAN	1423	Duodenal ulcer haemorrhage	1322	1	0.241987544333613	0.2250702771840517	3.612090863679478
KCNK1_HUMAN	1423	Duodenal ulcer perforation	736	1	0.14293288583677455	0.14765378068301946	6.491934735946382
KCNK1_HUMAN	1423	Duodenitis	1534	3	0.00434375263926018	0.006867046906751443	9.34991253609521
KCNK1_HUMAN	1423	Dysarthria	17218	19	9.629029139907553e-09	2.9459259404702577e-08	5.2712290591017625
KCNK1_HUMAN	1423	Dysgraphia	2700	2	0.11070933195540611	0.11943072440485464	3.537117888006368
KCNK1_HUMAN	1423	Dyskinesia	17986	10	0.005413734212615246	0.00838802179199846	2.654412567267796
KCNK1_HUMAN	1423	Dyslipidaemia	2294	6	1.1202515329742216e-05	2.5925771438164058e-05	12.5128637174491
KCNK1_HUMAN	1423	Dysphagia	36293	18	0.00137394934792645	0.0023839176984271292	2.3676994226483976
KCNK1_HUMAN	1423	Dysphemia	1975	2	0.06525608201396298	0.07653246001371851	4.83686977285412
KCNK1_HUMAN	1423	Dyspnoea exertional	10679	9	0.0005205728184739864	0.0009683053061968942	4.0247561647877514
KCNK1_HUMAN	1423	Dysstasia	11908	10	0.00026774038977680917	0.0005204224480517633	4.010398412271466
KCNK1_HUMAN	1423	Dysuria	15924	10	0.0023363872567934746	0.0038884187465336034	2.9983486432830153
KCNK1_HUMAN	1423	Eating disorder	7614	6	0.005919428542861635	0.00909485402239858	3.763069425016238
KCNK1_HUMAN	1423	Echocardiogram abnormal	780	3	0.0006405895005689292	0.0011742485840393736	18.42305803444243
KCNK1_HUMAN	1423	Economic problem	9202	23	1.8582853563911825e-17	9.192186579794578e-17	11.956221452355766
KCNK1_HUMAN	1423	Ejection fraction decreased	5737	9	4.810581836502213e-06	1.1590340887528743e-05	7.4972325904827715
KCNK1_HUMAN	1423	Electrocardiogram QRS complex prolonged	1623	3	0.005074940002776602	0.007907911389146966	8.836244501704796
KCNK1_HUMAN	1423	Electrocardiogram QT prolonged	12063	28	4.224717440062126e-20	2.3145076505217163e-19	11.101289311655714
KCNK1_HUMAN	1423	Electrocardiogram ST segment depression	1344	2	0.03290693894927247	0.042176987202993906	7.111135664561237
KCNK1_HUMAN	1423	Electrocardiogram T wave abnormal	978	3	0.0012254330982813802	0.002141739133758659	14.681760095140275
KCNK1_HUMAN	1423	Electrocardiogram T wave inversion	1470	1	0.26514025244245054	0.24202011297121773	3.2481770121991764
KCNK1_HUMAN	1423	Electrocardiogram abnormal	4115	6	0.0002713364888035466	0.0005270021404111908	6.967493839261022
KCNK1_HUMAN	1423	Electrolyte imbalance	4148	2	0.21622501942997696	0.2056462749636847	2.3017713607914088
KCNK1_HUMAN	1423	Electromechanical dissociation	2086	3	0.010038881736155969	0.014652508867274105	6.872163270648953
KCNK1_HUMAN	1423	Embolic stroke	1594	1	0.283993474145509	0.2547414719901729	2.995337119221965
KCNK1_HUMAN	1423	Emotional disorder	13598	6	0.06926822443184884	0.08064620890299093	2.106344333837812
KCNK1_HUMAN	1423	Endocarditis	2032	2	0.06855042019442985	0.07992211540675445	4.701056188099104
KCNK1_HUMAN	1423	Endotracheal intubation	1336	1	0.2442085299295848	0.22670481675849458	3.574211259116547
KCNK1_HUMAN	1423	Energy increased	2484	3	0.01595347331346462	0.022220367330146217	5.769736434003131
KCNK1_HUMAN	1423	Enterococcal infection	1957	2	0.06422717637938792	0.07547525072002718	4.881403612194977
KCNK1_HUMAN	1423	Epigastric discomfort	1440	2	0.03728740489471561	0.04706806230404012	6.636400599333227
KCNK1_HUMAN	1423	Epistaxis	27847	12	0.019289810940953684	0.026292027213661633	2.057081529407116
KCNK1_HUMAN	1423	Erosive oesophagitis	1070	1	0.2008758063464448	0.19414647354553502	4.463584687484182
KCNK1_HUMAN	1423	Erythema nodosum	1249	1	0.23030059898919458	0.21660319357796018	3.823375024776114
KCNK1_HUMAN	1423	Escherichia infection	2903	2	0.12458981855855818	0.1320507975660255	3.2896049851227787
KCNK1_HUMAN	1423	Essential hypertension	1165	1	0.21662962980764436	0.205967918960708	4.0992886863578955
KCNK1_HUMAN	1423	Excoriation	3344	3	0.034167642372136084	0.04361747624372745	4.284560339048719
KCNK1_HUMAN	1423	Exostosis	4237	5	0.0021973597390393456	0.0036777588757156182	5.637490584736047
KCNK1_HUMAN	1423	Extrasystoles	3564	4	0.0071581226666675695	0.010799975467238532	5.361316888674821
KCNK1_HUMAN	1423	Extremity necrosis	712	1	0.13861115218020728	0.144316717596461	6.711071773446681
KCNK1_HUMAN	1423	Eye inflammation	2041	2	0.06907551743876024	0.0804516920120663	4.68030606269798
KCNK1_HUMAN	1423	Eye injury	927	1	0.1765632122361627	0.17539095603554883	5.152885562549234
KCNK1_HUMAN	1423	Eye movement disorder	3060	2	0.13559323553883168	0.14174246797124443	3.1207142125052916
KCNK1_HUMAN	1423	Eye rolling	785	2	0.012112444289154908	0.017364393037187967	12.187923450627306
KCNK1_HUMAN	1423	Facial bones fracture	1780	2	0.054415525826197	0.06542315041036077	5.367347616333622
KCNK1_HUMAN	1423	Facial pain	3567	3	0.040099322912165114	0.05019578747449528	4.01647477350218
KCNK1_HUMAN	1423	Facial palsy	2915	2	0.1254230228370074	0.13278569283773473	3.276053574267484
KCNK1_HUMAN	1423	Facial paresis	1811	1	0.3158309966881464	0.27680660701566656	2.6362276413925914
KCNK1_HUMAN	1423	Faecal incontinence	5128	6	0.0008511812411850798	0.0015277856524981463	5.589502574291983
KCNK1_HUMAN	1423	Faecaloma	1970	1	0.33825728890007606	0.2925181906110436	2.423347908034835
KCNK1_HUMAN	1423	Faeces pale	963	1	0.18275261213766658	0.18034850983137454	4.96005408619604
KCNK1_HUMAN	1423	Fall	124030	89	8.520461011743913e-23	5.114352397898713e-22	3.4263876421194968
KCNK1_HUMAN	1423	Family stress	2785	2	0.11647050011826204	0.12469999290645975	3.429085182120439
KCNK1_HUMAN	1423	Fear of death	1055	1	0.1983595870544856	0.1923801095973684	4.527108188729213
KCNK1_HUMAN	1423	Feeding disorder	3037	3	0.026809735384472077	0.035214654002880326	4.718100228332817
KCNK1_HUMAN	1423	Feeling of despair	1768	5	4.2296318074559004e-05	9.156912407148444e-05	13.532535538629013
KCNK1_HUMAN	1423	Feelings of worthlessness	885	1	0.16928300879022984	0.1693253431629196	5.397705917330985
KCNK1_HUMAN	1423	Femoral neck fracture	2044	2	0.06925084661862946	0.08062792119336175	4.673430000901655
KCNK1_HUMAN	1423	Fibula fracture	1346	2	0.03299599674624671	0.042275905209302356	7.100553617441355
KCNK1_HUMAN	1423	Flat affect	1180	4	0.00012683377163297488	0.0002583452907418891	16.229836839865953
KCNK1_HUMAN	1423	Fluid intake reduced	1902	2	0.06111807706942672	0.07226462605182786	5.0227074009690424
KCNK1_HUMAN	1423	Fluid overload	9356	4	0.1356508917699163	0.14179177301927848	2.0408776864502096
KCNK1_HUMAN	1423	Foaming at mouth	1010	2	0.01944649071568243	0.02648457253964324	9.467404823255139
KCNK1_HUMAN	1423	Food craving	1577	1	0.2814376333624714	0.2529361162144579	3.027647227741491
KCNK1_HUMAN	1423	Foreign body trauma	810	1	0.1561223018978385	0.1584194060154457	5.898111286675637
KCNK1_HUMAN	1423	Fractured sacrum	525	1	0.10418319972072893	0.11368445401868227	9.106053494123264
KCNK1_HUMAN	1423	Frequent bowel movements	6324	3	0.14860975989300573	0.15214531845732926	2.2646283962603655
KCNK1_HUMAN	1423	Fungal skin infection	1244	2	0.028577491530111358	0.03730111589846557	7.6836908710476495
KCNK1_HUMAN	1423	Gait disturbance	78304	51	4.235754366544426e-12	1.6117200289974078e-11	3.1097871465240963
KCNK1_HUMAN	1423	Gallbladder operation	1814	1	0.31626108999672264	0.2771112050257039	2.6318654334917766
KCNK1_HUMAN	1423	Gastric dilatation	609	1	0.11981506086722962	0.12775855365723798	7.847980314014129
KCNK1_HUMAN	1423	Gastric infection	1105	1	0.20671634880208944	0.19849766744593106	4.322076114964303
KCNK1_HUMAN	1423	Gastric polyps	978	1	0.18531779086542977	0.18247600430120706	4.8839017716689765
KCNK1_HUMAN	1423	Gastric ulcer	8680	4	0.11159270316797504	0.1202389712227425	2.1998948966899907
KCNK1_HUMAN	1423	Gastritis erosive	2351	1	0.38905197160713767	0.32497860848029986	2.030456183370464
KCNK1_HUMAN	1423	Gastrointestinal disorder	23106	11	0.010897321140076651	0.015779939766959725	2.2726690772949336
KCNK1_HUMAN	1423	Gastrointestinal infection	2931	4	0.0036293295170694907	0.005823424492995913	6.520768064121066
KCNK1_HUMAN	1423	Gastrointestinal necrosis	1437	1	0.26003981148302785	0.23828840828267692	3.322821748551943
KCNK1_HUMAN	1423	Gastrointestinal stoma complication	564	1	0.11147505506037607	0.12013059406854922	8.475261156164459
KCNK1_HUMAN	1423	Genital rash	624	1	0.12257764235932372	0.13023033276984075	7.659024126678315
KCNK1_HUMAN	1423	Glossodynia	6926	4	0.05955516750209258	0.07065663705229519	2.757337203652465
KCNK1_HUMAN	1423	Goitre	2062	1	0.3508964364619619	0.30034581128950044	2.31517323188772
KCNK1_HUMAN	1423	Gout	6700	11	2.803246256547023e-07	7.607694358157375e-07	7.84680704741015
KCNK1_HUMAN	1423	Granuloma	1618	1	0.28758627268055437	0.2572567303232453	2.9508794254301733
KCNK1_HUMAN	1423	Grip strength decreased	1906	1	0.3293200655991848	0.28625018399742813	2.5047622209556906
KCNK1_HUMAN	1423	Haematocrit decreased	11489	6	0.03596395032220749	0.045646125990510246	2.493201444354571
KCNK1_HUMAN	1423	Haematocrit increased	709	1	0.13806940267431028	0.1438405681931944	6.739508518249421
KCNK1_HUMAN	1423	Haematoma	11522	6	0.036383934544310235	0.04609316927180278	2.4860569803337564
KCNK1_HUMAN	1423	Haemolytic anaemia	4277	2	0.22609777629279262	0.2133685274204017	2.2323144004306856
KCNK1_HUMAN	1423	Haemorrhage subcutaneous	1493	1	0.26867431113929957	0.24445955383153214	3.198104578365007
KCNK1_HUMAN	1423	Haemorrhagic anaemia	3518	3	0.03875409925500728	0.048707445030439396	4.072465460245169
KCNK1_HUMAN	1423	Haemorrhagic stroke	3394	2	0.15965305946225003	0.16141867391753226	2.813426905023933
KCNK1_HUMAN	1423	Haemorrhoids	8616	4	0.10942148955417595	0.11825762891553063	2.2162433956900096
KCNK1_HUMAN	1423	Hair colour changes	1960	1	0.3368687315400237	0.2915529226458149	2.435718239367325
KCNK1_HUMAN	1423	Hair disorder	1075	1	0.20171279367416364	0.19474858281580662	4.442804498063865
KCNK1_HUMAN	1423	Hair growth abnormal	2610	2	0.10469479666624197	0.1140899359160706	3.659181005307201
KCNK1_HUMAN	1423	Hallucination	26485	23	2.293675139556334e-08	6.811964419536899e-08	4.147311492372972
KCNK1_HUMAN	1423	Hallucination, auditory	6711	3	0.1679066078856527	0.16821232917802043	2.133976758014575
KCNK1_HUMAN	1423	Hallucination, visual	7700	7	0.0013855696448836774	0.0024024063650554804	4.341739791556497
KCNK1_HUMAN	1423	Hallucinations, mixed	1562	1	0.2791749056063202	0.25136628212691353	3.0567405707370856
KCNK1_HUMAN	1423	Hand fracture	2665	3	0.019166494367951505	0.026141203985477524	5.3774290355979595
KCNK1_HUMAN	1423	Head injury	12380	8	0.005210631136223573	0.008101504165831552	3.0854006019531783
KCNK1_HUMAN	1423	Head titubation	598	2	0.007209651163964926	0.010871118929432433	16.01198668094158
KCNK1_HUMAN	1423	Hearing impaired	6441	4	0.048102506853913526	0.058824087186460886	2.9650905893556563
KCNK1_HUMAN	1423	Heart injury	2391	3	0.014430675472216407	0.020301181884512857	5.994437224774611
KCNK1_HUMAN	1423	Heart rate abnormal	1627	1	0.2889289175841312	0.2582317337101313	2.9345461444776078
KCNK1_HUMAN	1423	Heart rate decreased	11996	20	3.412681159204864e-12	1.3058851111292126e-11	7.968557165866049
KCNK1_HUMAN	1423	Heart rate irregular	10465	12	3.3335381045650833e-06	8.165188199927812e-06	5.47774460643328
KCNK1_HUMAN	1423	Heart valve incompetence	1310	1	0.24007865735076206	0.2236658572904196	3.645203996119626
KCNK1_HUMAN	1423	Helicobacter infection	1587	1	0.2829421733275191	0.2540114973526451	3.008557396545139
KCNK1_HUMAN	1423	Hemiparesis	8360	5	0.032905339930692064	0.042175209923775964	2.855518869491676
KCNK1_HUMAN	1423	Hepatic cyst	1613	1	0.2868392664846268	0.2567266932684909	2.9600322772460235
KCNK1_HUMAN	1423	Hernia repair	1141	1	0.2126792627331763	0.20293177855089656	4.185589500807535
KCNK1_HUMAN	1423	Herpes virus infection	2401	3	0.014590264127052683	0.020503299809141645	5.969439571627094
KCNK1_HUMAN	1423	Herpes zoster ophthalmic	502	1	0.09985487405234765	0.11001868798564524	9.524095870100979
KCNK1_HUMAN	1423	Hiatus hernia	6437	7	0.0004950153846939285	0.0009239077972407933	5.194557420908885
KCNK1_HUMAN	1423	Hip fracture	12219	8	0.00482972427552286	0.007555482046136063	3.1260810946986095
KCNK1_HUMAN	1423	Hospice care	1195	1	0.22153975237661644	0.2098008784697898	3.9962914831830743
KCNK1_HUMAN	1423	Humerus fracture	2099	1	0.35591130165424584	0.3037073866965555	2.2743431987228746
KCNK1_HUMAN	1423	Hydronephrosis	3149	2	0.1419235382918698	0.1468998870555125	3.0324575982971655
KCNK1_HUMAN	1423	Hypercapnia	1170	1	0.2174501308881063	0.20660927662845316	4.081755372900419
KCNK1_HUMAN	1423	Hyperchlorhydria	1455	1	0.262826247594623	0.24034512437152006	3.281686403659278
KCNK1_HUMAN	1423	Hypercholesterolaemia	4390	7	4.897393321197666e-05	0.0001052244435598543	7.620580473749516
KCNK1_HUMAN	1423	Hyperkalaemia	13712	14	1.9959807682774026e-06	5.0011281271042455e-06	4.876770947064408
KCNK1_HUMAN	1423	Hyperkeratosis	2127	2	0.0741591590488056	0.08537240206751127	4.490891323219379
KCNK1_HUMAN	1423	Hyperkinesia	510	1	0.10136274418980738	0.1112792611535088	9.374404775875423
KCNK1_HUMAN	1423	Hyperlipidaemia	7980	7	0.0016928467915456342	0.002888398107808152	4.189264294047928
KCNK1_HUMAN	1423	Hypernatraemia	1989	2	0.06606015905045633	0.07735717755200684	4.80279016700613
KCNK1_HUMAN	1423	Hyperphosphataemia	745	4	2.1597793618483894e-05	4.842784618078577e-05	25.757473851123294
KCNK1_HUMAN	1423	Hypersomnia	10560	11	2.0261420020411678e-05	4.558187558437475e-05	4.975570418061095
KCNK1_HUMAN	1423	Hypertension	83411	44	7.981940783030548e-08	2.2696856153398793e-07	2.5183726097917156
KCNK1_HUMAN	1423	Hypertensive heart disease	1285	4	0.0001753649212865058	0.0003501355866979627	14.899522344794974
KCNK1_HUMAN	1423	Hypocalcaemia	7093	6	0.004234187981570878	0.006710023823755069	4.039711046355798
KCNK1_HUMAN	1423	Hypocoagulable state	580	1	0.11444939905911614	0.12287908832085308	8.241057048222089
KCNK1_HUMAN	1423	Hypoglycaemic coma	1499	1	0.269593445755293	0.24511814248618108	3.1852950807213554
KCNK1_HUMAN	1423	Hypoglycaemic seizure	566	1	0.11184739256015484	0.12047818386507501	8.44526023171786
KCNK1_HUMAN	1423	Hypokinesia	5261	8	2.0051562223513095e-05	4.513339859812103e-05	7.26681443886631
KCNK1_HUMAN	1423	Hypomania	1480	1	0.26667889431956143	0.24311928953919532	3.226215031048404
KCNK1_HUMAN	1423	Hypopnoea	1070	2	0.021648181882576167	0.029160914385342643	8.935528147791368
KCNK1_HUMAN	1423	Hypotension	75948	41	8.756931752971744e-08	2.4822303696907635e-07	2.5772913337076186
KCNK1_HUMAN	1423	Hypothyroidism	11479	6	0.035837298792753554	0.045504748081532036	2.495374547679207
KCNK1_HUMAN	1423	Hypovolaemia	3116	4	0.0044985044911819505	0.007085738027682072	6.133126003753972
KCNK1_HUMAN	1423	Idiopathic thrombocytopenic purpura	1737	1	0.3051361657290548	0.2693804692883827	2.748601400299879
KCNK1_HUMAN	1423	Ileostomy	739	1	0.14347157226514146	0.14807389076188016	6.465544757344973
KCNK1_HUMAN	1423	Ill-defined disorder	13216	17	6.392203527978367e-09	1.9818234638787334e-08	6.1456719846692955
KCNK1_HUMAN	1423	Immobile	1848	1	0.321116575672273	0.28055401341445646	2.583417450417212
KCNK1_HUMAN	1423	Impaired gastric emptying	2740	2	0.11341099049804608	0.1219318170722672	3.4854434119215414
KCNK1_HUMAN	1423	Impatience	814	2	0.012972647137528145	0.018462904901292487	11.75264047024776
KCNK1_HUMAN	1423	Implant site infection	1200	1	0.22235511221559892	0.21045114384126395	3.979626381084729
KCNK1_HUMAN	1423	Implantable defibrillator insertion	801	3	0.0006915425810870302	0.0012609119818009628	17.938240717746577
KCNK1_HUMAN	1423	Inappropriate affect	878	3	0.0009002215503862719	0.0016097259691528437	16.359675534584877
KCNK1_HUMAN	1423	Incision site infection	878	1	0.16806340520269336	0.16834146329621272	5.440789088849019
KCNK1_HUMAN	1423	Incoherent	3658	5	0.0011628474526458037	0.0020406055865017634	6.531032070791937
KCNK1_HUMAN	1423	Incontinence	4589	3	0.07328286297744747	0.08453852045916836	3.121394699686387
KCNK1_HUMAN	1423	Incorrect storage of drug	1807	1	0.3152571268498305	0.27639277600281886	2.64206646230376
KCNK1_HUMAN	1423	Increased appetite	6638	4	0.0525937133552295	0.06354359882001973	2.8770407180709014
KCNK1_HUMAN	1423	Increased tendency to bruise	3947	3	0.05131620643333117	0.06223182150737822	3.6294919099294547
KCNK1_HUMAN	1423	Infantile apnoeic attack	638	2	0.008162093341465787	0.012161127216362814	15.004943493460974
KCNK1_HUMAN	1423	Infusion site haematoma	560	1	0.11072991004731873	0.11944811841551685	8.535907032058303
KCNK1_HUMAN	1423	Infusion site reaction	775	1	0.14990953688138178	0.15322811442595202	6.16482174537544
KCNK1_HUMAN	1423	Inhibitory drug interaction	762	1	0.14759031299062608	0.15133545566736745	6.270134074797097
KCNK1_HUMAN	1423	Injury	49065	27	9.41367840376618e-06	2.1972144638752173e-05	2.627196150635343
KCNK1_HUMAN	1423	Intentional self-injury	4675	3	0.07649699843672078	0.0875763238361285	3.063937519854831
KCNK1_HUMAN	1423	Intermittent claudication	970	2	0.01803455934795191	0.02478543083815371	9.85861989859626
KCNK1_HUMAN	1423	International normalised ratio abnormal	2022	1	0.34543107177067395	0.29682012230045496	2.360995562058679
KCNK1_HUMAN	1423	International normalised ratio fluctuation	1253	1	0.2309456152867025	0.2171151731524516	3.811159769105903
KCNK1_HUMAN	1423	International normalised ratio increased	19768	13	0.0003685087629912617	0.0007016108183320935	3.139986656642251
KCNK1_HUMAN	1423	Intervertebral disc disorder	2350	2	0.08786464860141042	0.09870304127854349	4.064371406235597
KCNK1_HUMAN	1423	Intra-abdominal haematoma	708	2	0.009956413931575826	0.01454472656659375	13.517201220738215
KCNK1_HUMAN	1423	Investigation	3127	3	0.02886889325622396	0.03764068686158359	4.58217544582643
KCNK1_HUMAN	1423	Ischaemic cardiomyopathy	2270	3	0.01257856748598616	0.01797353136283151	6.314387336904177
KCNK1_HUMAN	1423	Ischaemic hepatitis	618	1	0.12147365179908973	0.12925329485967624	7.733504101978266
KCNK1_HUMAN	1423	Jaundice	14931	7	0.04021085082749665	0.050321105053742404	2.2380731852347986
KCNK1_HUMAN	1423	Jaw operation	615	1	0.1209211351950586	0.12876256674033576	7.771289952639398
KCNK1_HUMAN	1423	Joint contracture	677	1	0.13226955316607275	0.13894215836808718	7.05853850727898
KCNK1_HUMAN	1423	Joint lock	1149	1	0.21399825606795836	0.20392946721985475	4.156421629721769
KCNK1_HUMAN	1423	Kidney enlargement	541	1	0.1071819358192363	0.11623338444519099	8.836244501704797
KCNK1_HUMAN	1423	Knee arthroplasty	6554	3	0.15999068756302587	0.16170681403310258	2.185119232599873
KCNK1_HUMAN	1423	Kyphosis	918	3	0.001022727383082969	0.0018135159163117788	15.64449846203472
KCNK1_HUMAN	1423	Labelled drug-drug interaction medication error	1310	1	0.24007865735076206	0.2236658572904196	3.645203996119626
KCNK1_HUMAN	1423	Laboratory test abnormal	7441	4	0.07315511433543503	0.08441997037393328	2.5663961441014336
KCNK1_HUMAN	1423	Labyrinthitis	1319	1	0.24151077229695433	0.22471466497521356	3.620312618300903
KCNK1_HUMAN	1423	Lacunar infarction	1686	3	0.005634593239032037	0.008697929360742481	8.505475990945792
KCNK1_HUMAN	1423	Left atrial dilatation	922	6	5.968186001840609e-08	1.7153480983716777e-07	31.254838630484215
KCNK1_HUMAN	1423	Left ventricular dysfunction	2527	4	0.002141889521290309	0.003592390728951633	7.564918003837638
KCNK1_HUMAN	1423	Left ventricular failure	1499	1	0.269593445755293	0.24511814248618108	3.1852950807213554
KCNK1_HUMAN	1423	Left ventricular hypertrophy	2279	5	0.0001380190957264705	0.0002795769285536688	10.49158318144369
KCNK1_HUMAN	1423	Legal problem	521	2	0.005529672625359567	0.008551306168370403	18.38756081279611
KCNK1_HUMAN	1423	Lethargy	24564	32	1.183979711527805e-15	5.413841393748116e-15	6.2241278733678005
KCNK1_HUMAN	1423	Ligament rupture	1793	1	0.31324478824949864	0.27493540327411964	2.6627076065405078
KCNK1_HUMAN	1423	Limb discomfort	8452	7	0.0023278447789623485	0.003875334086928985	3.955121872876747
KCNK1_HUMAN	1423	Lipase increased	3735	2	0.18493658477401978	0.18215743908332072	2.556427554739132
KCNK1_HUMAN	1423	Listless	1468	1	0.26483213620127233	0.24180513660613193	3.2526053380508455
KCNK1_HUMAN	1423	Livedo reticularis	937	1	0.17828717134610153	0.17671904182571838	5.097833366368152
KCNK1_HUMAN	1423	Lobar pneumonia	2140	1	0.3614231033558569	0.30747510783267706	2.2307489625622208
KCNK1_HUMAN	1423	Logorrhoea	1834	1	0.319121438445426	0.2791525254463162	2.6031489530390566
KCNK1_HUMAN	1423	Long QT syndrome	681	3	0.00043269860866210696	0.000814493423500009	21.113150579294647
KCNK1_HUMAN	1423	Loss of control of legs	2457	2	0.09468754585865495	0.10525809726108706	3.8872277237642288
KCNK1_HUMAN	1423	Loss of employment	1811	2	0.05609260245470331	0.06713532558687212	5.275369851764058
KCNK1_HUMAN	1423	Lumbar spinal stenosis	1683	1	0.2972265350373488	0.2642056818736613	2.8368442514391146
KCNK1_HUMAN	1423	Lumbar vertebral fracture	1619	1	0.2877355719598897	0.257363259297072	2.9490556433378186
KCNK1_HUMAN	1423	Lung consolidation	1452	2	0.03784987362296207	0.04769373860692731	6.581478663338745
KCNK1_HUMAN	1423	Lung infiltration	6119	4	0.04123884349137983	0.05141917297748775	3.1212245500707048
KCNK1_HUMAN	1423	Lung neoplasm	3324	2	0.1545453963712756	0.15708250591785836	2.87271043402805
KCNK1_HUMAN	1423	Lupus-like syndrome	3431	4	0.006282210700556661	0.009595379550736256	5.569386671631854
KCNK1_HUMAN	1423	Lymphadenitis	929	1	0.17690829000584074	0.17564768760640656	5.1417802057333954
KCNK1_HUMAN	1423	Lymphoedema	2173	2	0.07692605893013121	0.08796911857115747	4.395736555431221
KCNK1_HUMAN	1423	Mastectomy	815	2	0.013002772152013774	0.018500482341060893	11.738184577910431
KCNK1_HUMAN	1423	Mastication disorder	1253	1	0.2309456152867025	0.2171151731524516	3.811159769105903
KCNK1_HUMAN	1423	Mean cell volume increased	672	1	0.1313598138042838	0.13815745756834702	7.111135664561237
KCNK1_HUMAN	1423	Medical device pain	1068	1	0.20054076685172423	0.19389308827927387	4.471951294208613
KCNK1_HUMAN	1423	Melanocytic naevus	1595	1	0.28414353688194405	0.25483616653222774	2.9934579867757782
KCNK1_HUMAN	1423	Meningioma	1147	1	0.21366871927575629	0.20368436424535016	4.163675419651475
KCNK1_HUMAN	1423	Menopause	1036	1	0.19516100087782629	0.19008981403014813	4.61021452262859
KCNK1_HUMAN	1423	Mental disorder	17333	9	0.01217146880686302	0.017440969975785415	2.47888179856184
KCNK1_HUMAN	1423	Mental status changes	14127	12	6.120707550337761e-05	0.00012988443979228314	4.056596838189662
KCNK1_HUMAN	1423	Metastases to central nervous system	3934	2	0.19994062285702663	0.1934558311471383	2.427045793957574
KCNK1_HUMAN	1423	Metastatic malignant melanoma	785	1	0.15168925980891518	0.15468010432558288	6.0861888149497325
KCNK1_HUMAN	1423	Micturition urgency	4327	3	0.0638776798731359	0.07511833764715764	3.3105263859301037
KCNK1_HUMAN	1423	Middle insomnia	7736	4	0.0815937962701215	0.09249916138607105	2.4684800987690587
KCNK1_HUMAN	1423	Migraine	29531	13	0.012995176897205862	0.018490843582786926	2.101444420420343
KCNK1_HUMAN	1423	Migraine with aura	1047	1	0.19701436371297956	0.19150578841647908	4.5617323431363195
KCNK1_HUMAN	1423	Mitral valve incompetence	6732	19	1.3121374709228427e-15	5.988804632329928e-15	13.505119706165829
KCNK1_HUMAN	1423	Mitral valve prolapse	1165	2	0.025333563791569445	0.03350976731529591	8.205626880344953
KCNK1_HUMAN	1423	Monoparesis	804	1	0.15506048833133854	0.15752061074010756	5.9421818566881575
[truncated: 494,535 more rows]
