# Supplementary material for: In Silico Profiling of Clinical Phenotypes for Human Targets Using Adverse Event Data
Source: High Throughput. 2018 Nov 23;7(4):37. doi: 10.3390/ht7040037 (PMC6306940; doi:10.3390/ht7040037)
Supplement: Supplementary file 1 [file high-throughput-07-00037-s001.zip › high-throughput-385126-suppl-final/Supplementary_File_3.txt]

SWISSPROT_ID	TARGET_CASE_COUNT	REACTION_NAME	REACTION_CASE_COUNT	NUM_CASES_TARGET_AND_REACTION	P-value Fisher Exact Test (two tailed)	Q-Value (Based on Fisher Exact Test)	PRR
GBRR3_HUMAN	111320	Abdominal infection	820	9	0.27006428241550273	0.24544805183164636	0.6659293721391947
GBRR3_HUMAN	111320	Abdominal pain lower	11078	161	0.13396716675639575	0.14038197018222567	0.8849710853570555
GBRR3_HUMAN	111320	Abnormal weight gain	3936	27	1.5950019161260538e-07	4.4227123449492816e-07	0.4144809829661449
GBRR3_HUMAN	111320	Abnormal withdrawal bleeding	762	2	0.0008072763269388655	0.0014545434795682174	0.15791483064470377
GBRR3_HUMAN	111320	Abortion incomplete	1779	2	1.442072365824902e-10	5.002923622832381e-10	0.06753813803600162
GBRR3_HUMAN	111320	Abortion induced	5978	75	0.018900983587736807	0.025816794777711732	0.7624212558655018
GBRR3_HUMAN	111320	Abortion spontaneous	17913	157	1.5740462921948589e-18	8.131196553014465e-18	0.5305924079895824
GBRR3_HUMAN	111320	Accidental drug intake by child	1604	7	1.81534823268562e-05	4.10665061311229e-05	0.26302658078579333
GBRR3_HUMAN	111320	Accidental exposure	7071	88	0.0075249260119194476	0.011301859415487019	0.7562182352511662
GBRR3_HUMAN	111320	Accidental needle stick	883	6	0.02287074032013333	0.030611364957611173	0.4105425471720919
GBRR3_HUMAN	111320	Acne	11468	137	0.00010870262236212445	0.0002233014095892203	0.725535794136729
GBRR3_HUMAN	111320	Acute febrile neutrophilic dermatosis	892	7	0.04621803166534813	0.05677063926212431	0.47463666611854455
GBRR3_HUMAN	111320	Acute graft versus host disease	1969	16	0.0023975707389231834	0.003982426129763849	0.49161401450066505
GBRR3_HUMAN	111320	Acute graft versus host disease in skin	1303	18	0.5840225521943128	0.4404755301172072	0.8405738845212246
GBRR3_HUMAN	111320	Acute lymphocytic leukaemia	1043	16	0.9029404672918879	0.6131727313836779	0.9348803995324234
GBRR3_HUMAN	111320	Acute myeloid leukaemia	5985	80	0.06658035482472224	0.07789183289374702	0.8129738952750201
GBRR3_HUMAN	111320	Adnexa uteri pain	652	7	0.35128102323906274	0.3005646011541811	0.6512456581626541
GBRR3_HUMAN	111320	Adrenocortical insufficiency acute	506	7	0.8600445635973486	0.5885465458371869	0.8417904799898035
GBRR3_HUMAN	111320	Adverse drug reaction	19971	313	0.45106269739398325	0.3646141244124992	0.9554578266802861
GBRR3_HUMAN	111320	Adverse event	38127	485	4.913902389592952e-09	1.5364780487859493e-08	0.7731710134376202
GBRR3_HUMAN	111320	Adverse reaction	3858	17	9.83875388702741e-12	3.6641472534911044e-11	0.26558963966799953
GBRR3_HUMAN	111320	Ageusia	9593	86	5.067703075872267e-10	1.6975323434185279e-09	0.5428270395991288
GBRR3_HUMAN	111320	Allergic granulomatous angiitis	867	5	0.010155184178532969	0.014804271261475129	0.34807213251152797
GBRR3_HUMAN	111320	Alopecia	48806	700	0.0002808884447399915	0.0005443539696145803	0.8731830738679416
GBRR3_HUMAN	111320	Amenorrhoea	8729	97	4.971572857729292e-05	0.00010671624374226347	0.6743212068540061
GBRR3_HUMAN	111320	Anaemia haemolytic autoimmune	896	14	1.0	0.6330520235558572	0.9525021530950384
GBRR3_HUMAN	111320	Anal fistula	1773	15	0.006370500244756133	0.009717046436570865	0.5120105430459678
GBRR3_HUMAN	111320	Anal pruritus	1536	24	0.919863879480899	0.6233895303688826	0.9525021530950384
GBRR3_HUMAN	111320	Angioedema	18895	290	0.27552731743726033	0.24914296244149178	0.9353514827759394
GBRR3_HUMAN	111320	Anorectal discomfort	3403	47	0.2512603790306981	0.23209987958238748	0.8403929902605509
GBRR3_HUMAN	111320	Anosmia	7019	54	2.3857007786625585e-10	8.165923240699466e-10	0.465242257692652
GBRR3_HUMAN	111320	Antepartum haemorrhage	882	2	9.66272634726808e-05	0.00019996294742787076	0.13638099010224417
GBRR3_HUMAN	111320	Antibody test positive	949	11	0.3046346172518173	0.26902808078782503	0.7037142772866329
GBRR3_HUMAN	111320	Antinuclear antibody increased	512	8	1.0	0.6330520235558572	0.9525021530950386
GBRR3_HUMAN	111320	Aplasia pure red cell	1773	29	1.0	0.6330520235558572	0.9978333908856852
GBRR3_HUMAN	111320	Application site burn	2501	21	0.0008809277428842638	0.0015774211809719367	0.5081291728002967
GBRR3_HUMAN	111320	Application site discharge	570	5	0.1852207761828835	0.18239358725581023	0.5310410234069683
GBRR3_HUMAN	111320	Application site discolouration	2083	10	2.398414003517119e-06	5.962541430058771e-06	0.2894724343704169
GBRR3_HUMAN	111320	Application site dryness	1185	3	9.519444647140012e-06	2.2206739001291507e-05	0.1523036437690036
GBRR3_HUMAN	111320	Application site erythema	13868	95	2.6853384210069004e-23	1.6384091784703245e-22	0.4139058582933134
GBRR3_HUMAN	111320	Application site exfoliation	1786	7	1.4867245637519278e-06	3.7749409365080647e-06	0.23611773440973127
GBRR3_HUMAN	111320	Application site irritation	6048	38	2.6846545031382142e-12	1.0336018273585878e-11	0.37941599908644297
GBRR3_HUMAN	111320	Application site pain	8148	62	5.4595673347241475e-12	2.0632442998126535e-11	0.46011296190814
GBRR3_HUMAN	111320	Application site paraesthesia	573	1	0.001478334853458221	0.002550932926842349	0.10490845392480319
GBRR3_HUMAN	111320	Application site pruritus	10025	96	8.173090471963554e-09	2.514173405333294e-08	0.5801926701499438
GBRR3_HUMAN	111320	Application site rash	7109	65	2.460375410972134e-07	6.710686458191716e-07	0.5537331511817408
GBRR3_HUMAN	111320	Application site reaction	4835	45	3.358100404453237e-05	7.359493913144953e-05	0.5637460551199236
GBRR3_HUMAN	111320	Application site scab	1065	11	0.14546165874038752	0.14965654794889865	0.6262656471488252
GBRR3_HUMAN	111320	Application site scar	643	10	1.0	0.6330520235558572	0.947987924881318
GBRR3_HUMAN	111320	Application site swelling	2610	18	2.7766921999957076e-05	6.145873208366376e-05	0.4167196919790794
GBRR3_HUMAN	111320	Application site urticaria	1294	7	0.0006137325339931416	0.0011280079313410792	0.32638185665494324
GBRR3_HUMAN	111320	Application site vesicles	3697	32	7.231750199120611e-05	0.00015208632274083022	0.5239411570640103
GBRR3_HUMAN	111320	Application site warmth	570	2	0.007823004753757544	0.011705518358576767	0.21129449170770223
GBRR3_HUMAN	111320	Asthmatic crisis	1015	13	0.45690573668257417	0.36751731415317485	0.7785421790267829
GBRR3_HUMAN	111320	Atrial thrombosis	844	12	0.785273615584935	0.5482475874151373	0.8654947448796262
GBRR3_HUMAN	111320	Autoimmune hepatitis	2251	32	0.4554947094409243	0.3667213264111069	0.8653647321494357
GBRR3_HUMAN	111320	Benign intracranial hypertension	1161	13	0.20162197401272342	0.19468203570481674	0.6795289750738994
GBRR3_HUMAN	111320	Bladder cancer	10861	56	1.0349142132393175e-26	6.998182845832623e-26	0.31100671875236424
GBRR3_HUMAN	111320	Bladder neoplasm	712	11	1.0	0.6330520235558572	0.9416319430739823
GBRR3_HUMAN	111320	Bladder transitional cell carcinoma	726	6	0.10479463245069515	0.11417516586758313	0.5000636303748952
GBRR3_HUMAN	111320	Bleeding time prolonged	622	10	1.0	0.6330520235558572	0.9805169223037161
GBRR3_HUMAN	111320	Blindness unilateral	5855	85	0.27941331463191654	0.2515358145095581	0.8839946325518079
GBRR3_HUMAN	111320	Blood calcium abnormal	552	9	1.0	0.6330520235558572	0.9946016957732723
GBRR3_HUMAN	111320	Blood count abnormal	4717	53	0.004065118865768523	0.006465331405226263	0.6819049505112208
GBRR3_HUMAN	111320	Blood glucose abnormal	6127	82	0.06256532716796633	0.07377781968718022	0.8139993586251396
GBRR3_HUMAN	111320	Blood glucose decreased	23515	268	2.312156862877938e-10	7.921467638869564e-10	0.6917901816516812
GBRR3_HUMAN	111320	Blood glucose fluctuation	5331	77	0.28051682592306937	0.2522850289419601	0.8794419384590849
GBRR3_HUMAN	111320	Blood glucose increased	86545	1144	2.3504639006826025e-14	1.0103598698195201e-13	0.8038399454089017
GBRR3_HUMAN	111320	Blood test abnormal	3465	51	0.5028299465776156	0.3953116205084706	0.896423379582413
GBRR3_HUMAN	111320	Blood testosterone decreased	4421	53	0.020608005094421417	0.027901382151840636	0.7281146266447651
GBRR3_HUMAN	111320	Blood testosterone increased	913	8	0.06787089839679675	0.07922553180954832	0.5304542377457452
GBRR3_HUMAN	111320	Blood thyroid stimulating hormone abnormal	559	8	0.8673619982397158	0.5926913461748545	0.8712542380397449
GBRR3_HUMAN	111320	Bone density abnormal	567	2	0.011473828387158276	0.01653200911018454	0.21241640936278736
GBRR3_HUMAN	111320	Bone marrow transplant	980	14	0.7059152210154787	0.5088099843925981	0.8696758789128611
GBRR3_HUMAN	111320	Brain operation	679	10	0.8797302401960383	0.5997030020199722	0.896975121748691
GBRR3_HUMAN	111320	Breast cancer	29038	247	2.896392550171228e-31	2.217627079685052e-30	0.5148096976246708
GBRR3_HUMAN	111320	Breast cancer female	15077	86	1.3463631210668637e-32	1.0647819868072714e-31	0.3442503278946647
GBRR3_HUMAN	111320	Breast cancer in situ	1331	12	0.030375558152611035	0.03935168113697022	0.545937549461599
GBRR3_HUMAN	111320	Breast cancer metastatic	4884	65	0.09080430063958947	0.10151138765606328	0.8093995262345265
GBRR3_HUMAN	111320	Breast cancer recurrent	1269	14	0.149766088994315	0.1531145247448514	0.6694078876731664
GBRR3_HUMAN	111320	Breast pain	4732	71	0.4918417299759039	0.38884167890306015	0.914083272000452
GBRR3_HUMAN	111320	Breast tenderness	4496	38	5.5946210937362046e-06	1.337919657584275e-05	0.5115051939231768
GBRR3_HUMAN	111320	Bronchiolitis	1361	19	0.5923012901516578	0.4453853827064593	0.849586495718898
GBRR3_HUMAN	111320	CD4 lymphocytes decreased	1068	17	1.0	0.6330520235558572	0.9706277887390926
GBRR3_HUMAN	111320	Calciphylaxis	771	8	0.2532342398338598	0.23357161599589554	0.6291757341545209
GBRR3_HUMAN	111320	Cardiac ablation	534	8	1.0	0.6330520235558572	0.9126636599998088
GBRR3_HUMAN	111320	Cardiac operation	3140	40	0.12125789058484229	0.12906462690385084	0.7742920728385474
GBRR3_HUMAN	111320	Cardiovascular disorder	19544	206	7.768206684285289e-12	2.9100754278886775e-11	0.63923740525739
GBRR3_HUMAN	111320	Catheter site erythema	683	6	0.13114198511850145	0.13795784130928665	0.5318254266911736
GBRR3_HUMAN	111320	Catheter site infection	1734	21	0.1844837996062259	0.18178846832360593	0.735645270604049
GBRR3_HUMAN	111320	Cerebral venous thrombosis	807	10	0.48598491509925185	0.38526293788710864	0.752918891405112
GBRR3_HUMAN	111320	Cerebrovascular accident	91721	1441	0.1045072034858851	0.11394528204190135	0.9578090713826637
GBRR3_HUMAN	111320	Chemical injury	737	9	0.46707391990680536	0.3735494213597619	0.7418526384682511
GBRR3_HUMAN	111320	Chemotherapy	641	5	0.11585654944972439	0.12413377848941212	0.47175814186310866
GBRR3_HUMAN	111320	Chorioretinopathy	594	1	0.0010318260148099432	0.0018285910396226262	0.1011933147470277
GBRR3_HUMAN	111320	Chronic graft versus host disease	1247	1	4.124383461297865e-08	1.2006820264751696e-07	0.04816022122390644
GBRR3_HUMAN	111320	Chronic myeloid leukaemia	1856	16	0.005872792766165269	0.00903094795056007	0.5218055273477168
GBRR3_HUMAN	111320	Circumstance or information capable of leading to medication error	5132	52	0.00021896473104320865	0.0004308988005288255	0.6142513884919972
GBRR3_HUMAN	111320	Cleft lip and palate	686	7	0.28856641394750504	0.2579727915371204	0.6186354190204888
GBRR3_HUMAN	111320	Coeliac disease	3910	46	0.023017699228621166	0.030787656440801375	0.7143766148212789
GBRR3_HUMAN	111320	Coital bleeding	838	4	0.003921125248223007	0.006253133072338487	0.28780640597116275
GBRR3_HUMAN	111320	Colectomy	1874	25	0.3616822158357717	0.30765604149596737	0.8113525641561306
GBRR3_HUMAN	111320	Colitis ulcerative	9321	81	2.094832252808293e-10	7.196343839401221e-10	0.5260409618229417
GBRR3_HUMAN	111320	Colon cancer	5749	81	0.17674394354195908	0.17553763391054428	0.8575544261192627
GBRR3_HUMAN	111320	Colon cancer metastatic	849	12	0.7857695173805385	0.5484899277247673	0.8603245253761638
GBRR3_HUMAN	111320	Colorectal cancer	777	10	0.5701259876645681	0.43256265783417447	0.782368130964634
GBRR3_HUMAN	111320	Complication of device insertion	1918	9	5.265864478313378e-06	1.2630866301045958e-05	0.2829066112126175
GBRR3_HUMAN	111320	Complication of device removal	1433	8	0.00036342240048864265	0.0006925823700349645	0.3368849720420347
GBRR3_HUMAN	111320	Congenital anomaly	5386	54	0.00010602742420897235	0.00021814097215115024	0.6077292432163018
GBRR3_HUMAN	111320	Corneal disorder	958	7	0.021448512886739154	0.028923463300510262	0.4416965820346077
GBRR3_HUMAN	111320	Corneal opacity	512	8	1.0	0.6330520235558572	0.9525021530950386
GBRR3_HUMAN	111320	Coronary arterial stent insertion	3605	33	0.00029156073451236473	0.0005636884912774247	0.5543818522633217
GBRR3_HUMAN	111320	Coronary artery bypass	4749	48	0.0003765899403904714	0.0007159224085812949	0.6127135739118051
GBRR3_HUMAN	111320	Craniosynostosis	529	3	0.056457707451845786	0.06749604555816592	0.34224887249992825
GBRR3_HUMAN	111320	Crohn's disease	19179	236	3.868320441471395e-06	9.411551317276327e-06	0.7476008030521581
GBRR3_HUMAN	111320	Cryptorchism	505	7	0.859961871722815	0.5885133215025721	0.8434808223191003
GBRR3_HUMAN	111320	Cushingoid	1044	15	0.7143715168011899	0.5137375558372484	0.8747468752913617
GBRR3_HUMAN	111320	Cutaneous lupus erythematosus	1423	19	0.4633154055778182	0.3713641212358436	0.8120691433438468
GBRR3_HUMAN	111320	Cystic fibrosis	960	5	0.0031411395180970837	0.005105418531542581	0.3141761028533373
GBRR3_HUMAN	111320	Cystitis haemorrhagic	1503	21	0.5415298380446895	0.4159935770349361	0.8503106265484048
GBRR3_HUMAN	111320	Cytomegalovirus chorioretinitis	509	6	0.5971667851890308	0.4473922202743125	0.7157968466598897
GBRR3_HUMAN	111320	Cytomegalovirus infection	5214	78	0.4450370674879156	0.3608131789086161	0.9113309151692015
GBRR3_HUMAN	111320	Death	288756	4661	0.28419927589878424	0.2548734033624387	0.9845142988834242
GBRR3_HUMAN	111320	Death neonatal	760	10	0.5687829993096242	0.43180306075900027	0.8001018085998323
GBRR3_HUMAN	111320	Dengue fever	878	11	0.42638975006922863	0.34902807715686257	0.7613425514358266
GBRR3_HUMAN	111320	Dermatitis psoriasiform	643	10	1.0	0.6330520235558572	0.947987924881318
GBRR3_HUMAN	111320	Device breakage	6514	40	1.5646732024275758e-13	6.445319940877354e-13	0.37076080101938474
GBRR3_HUMAN	111320	Device dislocation	16242	61	2.6185051397351264e-52	3.0359322053963983e-51	0.2262199971784335
GBRR3_HUMAN	111320	Device leakage	3077	39	0.11752004606660418	0.12566118347618765	0.7703416030791671
GBRR3_HUMAN	111320	Device malfunction	14323	139	1.263059969356395e-11	4.673855109811744e-11	0.5880612912192085
GBRR3_HUMAN	111320	Device misuse	2016	14	0.0002927330405836278	0.0005657780090158695	0.4196338156992127
GBRR3_HUMAN	111320	Diffuse large B-cell lymphoma	1410	14	0.05808824503481212	0.06914107657438731	0.6017957729439999
GBRR3_HUMAN	111320	Disease complication	1815	25	0.45844683741882153	0.3684339107462418	0.838095469902059
GBRR3_HUMAN	111320	Disease progression	40262	625	0.17437105802779662	0.17358586498884992	0.9462061275605403
GBRR3_HUMAN	111320	Disseminated tuberculosis	1123	16	0.7233054926406435	0.5185937837231425	0.8673190337125555
GBRR3_HUMAN	111320	Drug administered at inappropriate site	8357	102	0.0018963703480702188	0.003210417995115271	0.7414632145110499
GBRR3_HUMAN	111320	Drug administration error	24747	308	3.9564048305782373e-07	1.0601601858062554e-06	0.7562646498897715
GBRR3_HUMAN	111320	Drug delivery system malfunction	1018	3	9.942625614650545e-05	0.0002053904837835912	0.17736246988666232
GBRR3_HUMAN	111320	Drug dispensing error	11084	130	6.024847023041039e-05	0.0001279479901528122	0.7121592691115908
GBRR3_HUMAN	111320	Drug dose omission	91815	943	6.46531593767979e-56	7.931775394548323e-55	0.622713271560251
GBRR3_HUMAN	111320	Drug effect decreased	51198	839	1.0	0.6330520235558572	0.9997499216851894
GBRR3_HUMAN	111320	Drug effect delayed	2600	32	0.10465070101767075	0.11405827619153809	0.7477586996260116
GBRR3_HUMAN	111320	Drug exposure before pregnancy	954	8	0.05420809997805802	0.06520446538705915	0.5074641492176526
GBRR3_HUMAN	111320	Drug exposure via breast milk	1199	16	0.49387620838212887	0.39004186709404737	0.81159946772595
GBRR3_HUMAN	111320	Drug ineffective	376367	5473	8.444933343505665e-21	4.742260278806497e-20	0.8854869312661195
GBRR3_HUMAN	111320	Drug prescribing error	12833	206	0.8075127821496102	0.5598904122385574	0.9789794046778656
GBRR3_HUMAN	111320	Drug resistance	4862	61	0.03626727347635579	0.04597538982324595	0.7624381950310837
GBRR3_HUMAN	111320	Drug screen false positive	1629	25	0.8450509944293166	0.580088126765631	0.9352811041924474
GBRR3_HUMAN	111320	Drug specific antibody present	1981	9	2.078085293664306e-06	5.197740742337044e-06	0.2738685196779345
GBRR3_HUMAN	111320	Dry throat	3772	48	0.08280793898907601	0.09370320542136346	0.7734603949944673
GBRR3_HUMAN	111320	Dysmenorrhoea	5147	39	4.547812799059811e-08	1.3197279871902435e-07	0.4581632322150567
GBRR3_HUMAN	111320	Dyspareunia	2256	31	0.36145556645942045	0.30749704818626356	0.8360614404470158
GBRR3_HUMAN	111320	Early satiety	995	11	0.21161560908944171	0.20217357794842034	0.6708170651370545
GBRR3_HUMAN	111320	Ectopic pregnancy	1734	5	1.2763362762617873e-07	3.569304717027378e-07	0.17353278092824587
GBRR3_HUMAN	111320	Educational problem	1015	7	0.01280297149410916	0.018257742098920747	0.4167196919790793
GBRR3_HUMAN	111320	Ejaculation disorder	1546	17	0.10776939741737913	0.1167666561258215	0.6671875774786045
GBRR3_HUMAN	111320	Ejaculation failure	1281	14	0.15071006097583134	0.15388840467493947	0.6630677971821815
GBRR3_HUMAN	111320	Endometrial cancer	1139	17	0.8151764238704877	0.5640403744975089	0.9092066006816277
GBRR3_HUMAN	111320	Endophthalmitis	1796	8	6.190632644239635e-06	1.473648967827362e-05	0.2684905397986015
GBRR3_HUMAN	111320	Epstein-Barr virus associated lymphoproliferative disorder	1297	16	0.32298338473777455	0.2818990591151234	0.7495098909600304
GBRR3_HUMAN	111320	Epstein-Barr virus infection	1993	25	0.2154238947528629	0.2050299548307587	0.7622921194739256
GBRR3_HUMAN	111320	Erection increased	2632	14	4.561295627179293e-07	1.2153689504523646e-06	0.320896447299398
GBRR3_HUMAN	111320	Eructation	6434	103	0.8827733820018036	0.6014013787278452	0.9762733330332813
GBRR3_HUMAN	111320	Erythema nodosum	1249	6	0.00031579301642051835	0.0006073155759021125	0.28965874004016456
GBRR3_HUMAN	111320	Erythema of eyelid	1906	29	0.7863339172596451	0.548766177320055	0.9271291602049201
GBRR3_HUMAN	111320	Expired drug administered	5075	63	0.02331142720351144	0.031130712876311528	0.754285922911853
GBRR3_HUMAN	111320	Extravasation	1981	27	0.3760447897516487	0.3173642175430323	0.8291740851661518
GBRR3_HUMAN	111320	Eye haemorrhage	5687	59	0.000164390102411574	0.0003294312563716736	0.6290779145441112
GBRR3_HUMAN	111320	Eye inflammation	2041	17	0.0028573234327182997	0.004681046233691059	0.5040167025517719
GBRR3_HUMAN	111320	Eye irritation	14153	148	3.3916792317341925e-09	1.07317404769458e-08	0.6341399554057935
GBRR3_HUMAN	111320	Eye operation	1149	10	0.036057957366665734	0.04575066320136973	0.5268449134766235
GBRR3_HUMAN	111320	Eye pruritus	7429	73	2.3125391119152915e-06	5.758953542130343e-06	0.5955080753241003
GBRR3_HUMAN	111320	Eye swelling	13396	189	0.03766044533071074	0.04748160309997077	0.8587448426518227
GBRR3_HUMAN	111320	Eyelid irritation	546	2	0.010868413748666018	0.015741453039590785	0.22061630751833614
GBRR3_HUMAN	111320	Eyelids pruritus	996	10	0.13268664412572517	0.13931359725386577	0.60859671039541
GBRR3_HUMAN	111320	Factor VIII inhibition	633	1	0.000759211084046276	0.0013744576177976428	0.09494879057751177
GBRR3_HUMAN	111320	Fallot's tetralogy	682	8	0.4483395111497893	0.3629489978415314	0.7122568029078628
GBRR3_HUMAN	111320	Fear of disease	994	14	0.7067538840181375	0.5093014958452482	0.8572519377855347
GBRR3_HUMAN	111320	Female genital tract fistula	532	7	0.7313627734290282	0.5215417769199848	0.8001018085998323
GBRR3_HUMAN	111320	Femur fracture	17598	237	0.0017959136693290428	0.0030522693680501848	0.8191814784783145
GBRR3_HUMAN	111320	Finger deformity	1477	18	0.2577936338944701	0.23666946265887834	0.7403272389374733
GBRR3_HUMAN	111320	Fluid retention	18723	290	0.3416219568972223	0.2944820857903989	0.944079332558257
GBRR3_HUMAN	111320	Flushing	54320	625	2.5359519907921605e-21	1.4493887443401715e-20	0.6984779267737619
GBRR3_HUMAN	111320	Food allergy	1706	20	0.1513249957962916	0.1543811788414149	0.7118343492881071
GBRR3_HUMAN	111320	Foot operation	1581	25	1.0	0.6330520235558572	0.9641329634477414
GBRR3_HUMAN	111320	Foreign body sensation in eyes	1841	25	0.4076995946337888	0.33636212112188185	0.8260963056853996
GBRR3_HUMAN	111320	Fracture delayed union	610	8	0.6332170960884678	0.46789867426973414	0.7974436630563113
GBRR3_HUMAN	111320	Frequent bowel movements	6324	68	0.00023740407896242788	0.0004649390028798673	0.652256909184646
GBRR3_HUMAN	111320	Full blood count abnormal	622	10	1.0	0.6330520235558572	0.9805169223037161
GBRR3_HUMAN	111320	Full blood count decreased	4845	72	0.42832679567655724	0.3503110034337167	0.905206320226083
GBRR3_HUMAN	111320	Fungal peritonitis	1042	4	0.00033186720128219844	0.0006362817154917713	0.23124329728318857
GBRR3_HUMAN	111320	Gallbladder injury	2560	32	0.13823801123090818	0.14399343578031892	0.7595903246200941
GBRR3_HUMAN	111320	Gallbladder operation	1814	27	0.7109869082686031	0.5117458526593899	0.9066626538414441
GBRR3_HUMAN	111320	Gallbladder pain	605	9	1.0	0.6330520235558572	0.90615557182028
GBRR3_HUMAN	111320	Gastric bypass	1137	9	0.01914957997809327	0.02612010239224381	0.4787843269546869
GBRR3_HUMAN	111320	Gastric haemorrhage	5437	86	0.7893365916341042	0.5504537653449508	0.9644284555165237
GBRR3_HUMAN	111320	Gastric infection	1105	18	1.0	0.6330520235558572	0.9936866988130392
GBRR3_HUMAN	111320	Gastrointestinal inflammation	2143	24	0.06060708457742629	0.0717349043637663	0.6796523149974979
GBRR3_HUMAN	111320	Gastrointestinal injury	1163	10	0.03644543308946107	0.04615921816936985	0.5204478373372717
GBRR3_HUMAN	111320	Gastrointestinal perforation	1669	21	0.24716246883709764	0.2289738688106182	0.7646604056703494
GBRR3_HUMAN	111320	Gastrointestinal stromal tumour	1264	19	0.8243061825618669	0.5691429002807449	0.9157791785178804
GBRR3_HUMAN	111320	Gastrointestinal toxicity	1131	10	0.04542249559241949	0.05590618341752357	0.5353045106600127
GBRR3_HUMAN	111320	General symptom	4897	31	4.400528088771319e-10	1.4799850534270846e-09	0.3822927877095376
GBRR3_HUMAN	111320	Genital haemorrhage	5849	12	3.9855248974414806e-27	2.729347538882836e-26	0.1233667342367396
GBRR3_HUMAN	111320	Genital pain	782	10	0.5709712255626083	0.4330066576574751	0.77730097985735
GBRR3_HUMAN	111320	Genital rash	624	9	0.8741984137461574	0.5965301048898327	0.8781605216339623
GBRR3_HUMAN	111320	Glioblastoma	605	9	1.0	0.6330520235558572	0.90615557182028
GBRR3_HUMAN	111320	Glomerulonephritis	1080	13	0.3354735065535589	0.2905636832834188	0.7311145861151233
GBRR3_HUMAN	111320	Gout	6700	108	0.9232668702649195	0.6254686837587761	0.9831348072904493
GBRR3_HUMAN	111320	Graft complication	590	8	0.7449191075788324	0.527449678083535	0.824847225360652
GBRR3_HUMAN	111320	Graft versus host disease	3271	37	0.0191141383426737	0.02607667151752558	0.6865437596983719
GBRR3_HUMAN	111320	Growth retardation	1373	21	0.8319279430734202	0.572977864828676	0.9320712637165206
GBRR3_HUMAN	111320	Gynaecomastia	9081	93	9.96466852338978e-07	2.5732525535107885e-06	0.6209067773680274
GBRR3_HUMAN	111320	HIV infection	1323	10	0.008830579887053247	0.013065673329734233	0.4570269279892416
GBRR3_HUMAN	111320	Haemarthrosis	1684	25	0.7009193798904125	0.5059242146906239	0.9042741959763023
GBRR3_HUMAN	111320	Haematotoxicity	2406	8	2.5530205355342966e-09	8.154696034240337e-09	0.20019227904916573
GBRR3_HUMAN	111320	Haemoglobinuria	785	8	0.20461900546284761	0.1968977537724984	0.617839234440025
GBRR3_HUMAN	111320	Haemorrhage intracranial	6600	106	0.8842946510551826	0.60232442617134	0.9794902030133457
GBRR3_HUMAN	111320	Hair colour changes	1960	22	0.07462797848570728	0.08581689751013159	0.6812012302320554
GBRR3_HUMAN	111320	Hair disorder	1075	11	0.11839639614212434	0.1264575912960086	0.6203796918184791
GBRR3_HUMAN	111320	Hair growth abnormal	2610	39	0.6431664004067834	0.4735569761206223	0.9102675185353986
GBRR3_HUMAN	111320	Hair texture abnormal	2504	26	0.014566546103716594	0.02047300618493442	0.6296200673001101
GBRR3_HUMAN	111320	Heart disease congenital	2198	36	1.0	0.6330520235558572	0.999202073644564
GBRR3_HUMAN	111320	Heart valve incompetence	1310	21	1.0	0.6330520235558572	0.977626337117716
GBRR3_HUMAN	111320	Hepatitis B	3280	32	0.0018904999867687526	0.0032011855555640154	0.5912082329555411
GBRR3_HUMAN	111320	Hepatitis C virus test	817	5	0.01785353406202337	0.024571263652264023	0.3695051455972132
GBRR3_HUMAN	111320	Hereditary angioedema	1400	11	0.008219371256264	0.01223860283495903	0.4752224565117794
GBRR3_HUMAN	111320	Herpes zoster ophthalmic	502	4	0.15924633981150407	0.16106866086478486	0.48198904132520026
GBRR3_HUMAN	111320	Hip surgery	1389	21	0.8322210619552268	0.5731481482946069	0.9211698454274385
GBRR3_HUMAN	111320	Hirsutism	624	7	0.42720185276379763	0.34957568628855684	0.6807997561019643
GBRR3_HUMAN	111320	Histoplasmosis	720	11	1.0	0.6330520235558572	0.9310070410364761
GBRR3_HUMAN	111320	Hodgkin's disease	1484	12	0.010040798848750258	0.014655032737118564	0.4891926818884844
GBRR3_HUMAN	111320	Hordeolum	747	12	1.0	0.6330520235558572	0.9797165003263252
GBRR3_HUMAN	111320	Hospice care	1195	18	0.8197596729640775	0.5666791743036262	0.9177038586319233
GBRR3_HUMAN	111320	Hospitalisation	29762	291	3.563629540562688e-22	2.0950701418683856e-21	0.5925222073459109
GBRR3_HUMAN	111320	Hypersensitivity	60520	885	0.000513063567706293	0.0009553384352748624	0.8905300166984803
GBRR3_HUMAN	111320	Hypogeusia	831	11	0.5839245324085233	0.440417658142578	0.8049804781644655
GBRR3_HUMAN	111320	Hypoglycaemic seizure	566	6	0.40364723332863794	0.3337538318707018	0.642938953339151
GBRR3_HUMAN	111320	Hypoglycaemic unconsciousness	1278	17	0.4409143685123677	0.35818208288762743	0.8089847787191009
GBRR3_HUMAN	111320	Hypomenorrhoea	1305	2	2.7527890613576124e-07	7.476503600168593e-07	0.09210688510358776
GBRR3_HUMAN	111320	Hyposmia	665	8	0.446728469519555	0.36188117225214084	0.730686583196194
GBRR3_HUMAN	111320	IUCD complication	2762	3	6.207038081707443e-16	2.8760588715452032e-15	0.06524933198077647
GBRR3_HUMAN	111320	IUD migration	961	1	4.941056082822582e-06	1.188955200814533e-05	0.0625079537968619
GBRR3_HUMAN	111320	Idiopathic pulmonary fibrosis	590	9	1.0	0.6330520235558572	0.9295502939843148
GBRR3_HUMAN	111320	Ileal stenosis	674	6	0.16838814133030916	0.16861442324111728	0.5389907393262343
GBRR3_HUMAN	111320	Immune reconstitution syndrome	2726	35	0.15182120438842395	0.15479222906479934	0.7804783528705165
GBRR3_HUMAN	111320	Implant site pain	1414	16	0.14256086380983513	0.14736967293991426	0.6867826683260364
GBRR3_HUMAN	111320	Inappropriate schedule of drug administration	41688	525	2.1333922543830592e-10	7.324787308281875e-10	0.7653477325175133
GBRR3_HUMAN	111320	Incorrect dose administered	58553	838	5.3849437126777536e-05	0.00011509246489561063	0.8712882035952432
GBRR3_HUMAN	111320	Incorrect drug administration duration	19947	187	2.695507726711043e-17	1.325178928359661e-16	0.5678860255876846
GBRR3_HUMAN	111320	Incorrect drug dosage form administered	525	8	1.0	0.6330520235558572	0.9285514219727262
GBRR3_HUMAN	111320	Incorrect product storage	8707	25	5.083517800056807e-34	4.154688936381187e-33	0.17279323786278342
GBRR3_HUMAN	111320	Incorrect route of drug administration	29448	282	2.1512038210111618e-23	1.3167329400741933e-22	0.5802013732389238
GBRR3_HUMAN	111320	Incorrect storage of drug	1807	12	0.0003897237357358117	0.0007390501041579506	0.4011652522227571
GBRR3_HUMAN	111320	Infarction	3709	59	0.8969779096499614	0.6096256653068128	0.9699864391929474
GBRR3_HUMAN	111320	Infectious mononucleosis	1054	15	0.7149609230045644	0.5140740566990639	0.8663277523337933
GBRR3_HUMAN	111320	Infertility	784	6	0.06478334656739929	0.07605018662644232	0.46278382245491584
GBRR3_HUMAN	111320	Infertility female	827	12	0.7843487636676418	0.5477252383822575	0.8835480094967473
GBRR3_HUMAN	111320	Inflammatory bowel disease	5945	40	4.6498876559996665e-11	1.6626817335141691e-10	0.40648694763751003
GBRR3_HUMAN	111320	Infrequent bowel movements	973	14	0.7996948404269353	0.5563083436652149	0.8760238780290134
GBRR3_HUMAN	111320	Infusion related reaction	18281	241	0.0004620826539552198	0.0008662579612087601	0.8016541125522156
GBRR3_HUMAN	111320	Infusion site erythema	1612	22	0.43301271727672397	0.3531534364157365	0.8302943296790714
GBRR3_HUMAN	111320	Infusion site extravasation	1472	13	0.0179489361601132	0.02468371848172602	0.5346807836770641
GBRR3_HUMAN	111320	Infusion site haematoma	560	3	0.04270648772043791	0.05296139942577222	0.3232009101166288
GBRR3_HUMAN	111320	Infusion site haemorrhage	552	5	0.23674953443923857	0.22126525268421027	0.5485158651278558
GBRR3_HUMAN	111320	Infusion site infection	637	8	0.5339689985933247	0.4124253079337419	0.763213171955325
GBRR3_HUMAN	111320	Infusion site pain	2614	18	2.7914403652535385e-05	6.176925085916272e-05	0.4160775969221008
GBRR3_HUMAN	111320	Infusion site swelling	865	14	1.0	0.6330520235558572	0.9871996463335181
GBRR3_HUMAN	111320	Inhalation therapy	561	4	0.09414069808905187	0.10474921442018388	0.4309345468221718
GBRR3_HUMAN	111320	Injection site atrophy	872	5	0.010307785844096046	0.015004984270362362	0.34606479610719393
GBRR3_HUMAN	111320	Injection site cellulitis	852	13	1.0	0.6330520235558572	0.9297964998627372
GBRR3_HUMAN	111320	Injection site discolouration	5143	46	6.15382977364195e-06	1.465535199641983e-05	0.5415639081164256
GBRR3_HUMAN	111320	Injection site discomfort	2719	7	4.718056951877307e-12	1.789762940480623e-11	0.15488696516036576
GBRR3_HUMAN	111320	Injection site erythema	60929	345	5.3862935945396977e-129	1.3981488831648272e-127	0.3417178512069302
GBRR3_HUMAN	111320	Injection site extravasation	5452	32	3.812743847665593e-12	1.4544917174058539e-11	0.35428862373424314
GBRR3_HUMAN	111320	Injection site haematoma	42874	253	2.71680153398741e-86	4.853546930975161e-85	0.3562077806288407
GBRR3_HUMAN	111320	Injection site haemorrhage	28483	181	3.586121515514113e-52	4.1477234282520416e-51	0.38376729742571986
GBRR3_HUMAN	111320	Injection site hypersensitivity	616	4	0.054668622698787486	0.06569051740068355	0.3922067689214865
GBRR3_HUMAN	111320	Injection site induration	6486	48	2.9681289891586723e-10	1.0097952409486058e-09	0.44740082493932837
GBRR3_HUMAN	111320	Injection site inflammation	1897	28	0.6510232874182702	0.47838228752109174	0.8989907961795868
GBRR3_HUMAN	111320	Injection site injury	937	4	0.001147461218443693	0.0020158210949177595	0.2572674625722933
GBRR3_HUMAN	111320	Injection site irritation	7569	39	4.670960747361401e-19	2.4622307635497837e-18	0.31079651927682733
GBRR3_HUMAN	111320	Injection site mass	9094	77	9.388979499411928e-11	3.294828713280104e-10	0.5124307357950573
GBRR3_HUMAN	111320	Injection site nodule	5416	55	0.00013881644220582582	0.00028108984178685186	0.6156351353244373
GBRR3_HUMAN	111320	Injection site pain	112066	639	7.072028445681848e-235	3.3085221704860075e-233	0.3441255636169597
GBRR3_HUMAN	111320	Injection site papule	2154	16	0.0004584265031206683	0.0008599206629185689	0.44907491595874593
GBRR3_HUMAN	111320	Injection site pruritus	29445	134	1.153530835503828e-79	1.9265018800165174e-78	0.27433465853871636
GBRR3_HUMAN	111320	Injection site rash	11376	73	2.2340409229721714e-21	1.279446828389114e-20	0.3875570558333259
GBRR3_HUMAN	111320	Injection site reaction	30049	168	3.407117817541951e-65	4.7672912735973034e-64	0.3373810377282516
GBRR3_HUMAN	111320	Injection site swelling	30319	131	4.0658012150216444e-86	7.252151002592777e-85	0.2604014929605589
GBRR3_HUMAN	111320	Injection site urticaria	8737	51	6.33483587832691e-19	3.321821325201276e-18	0.3523358758800781
GBRR3_HUMAN	111320	Injection site vesicles	2052	17	0.0022300112763650537	0.00372680914778424	0.5012922879433839
GBRR3_HUMAN	111320	Injection site warmth	11898	42	1.9180998752322005e-40	1.799514163972835e-39	0.2125776566371012
GBRR3_HUMAN	111320	Insulin resistance	676	8	0.44740386646086	0.3623249290580254	0.7186543191016459
GBRR3_HUMAN	111320	Intercepted drug dispensing error	1248	12	0.05770801144055959	0.06875242748384866	0.5825984043202662
GBRR3_HUMAN	111320	Internal injury	555	6	0.40075536755454605	0.3319540307381865	0.6558211545900264
GBRR3_HUMAN	111320	International normalised ratio abnormal	2022	29	0.5392903733655174	0.41502210870058553	0.8731668006546086
GBRR3_HUMAN	111320	Intestinal fistula	640	8	0.5340338288073572	0.4124567725240239	0.7595903246200941
GBRR3_HUMAN	111320	Intestinal haemorrhage	2355	35	0.626110364759985	0.4636338070007329	0.9052876067131723
GBRR3_HUMAN	111320	Intestinal operation	572	2	0.00783047850083943	0.011715767487273236	0.21055310752627168
GBRR3_HUMAN	111320	Intestinal perforation	4565	71	0.7262387050509762	0.5202785382872179	0.9480512084544075
GBRR3_HUMAN	111320	Intestinal resection	1673	20	0.17658240744901882	0.1754071018464146	0.726045198366454
GBRR3_HUMAN	111320	Intestinal stenosis	1541	14	0.020558948196884214	0.0278402062011037	0.5501682377405527
GBRR3_HUMAN	111320	Intestinal ulcer	689	11	1.0	0.6330520235558572	0.973575209579442
GBRR3_HUMAN	111320	Intra-uterine contraceptive device expelled	5706	1	2.008871588536779e-39	1.8467996496310602e-38	0.010518428684485088
GBRR3_HUMAN	111320	Intramedullary rod insertion	2057	11	1.1300264760009232e-05	2.614124909148061e-05	0.3226216970160614
GBRR3_HUMAN	111320	Intraocular pressure increased	5427	84	0.6304842554455271	0.4662313583335226	0.9434103301850915
GBRR3_HUMAN	111320	Investigation	3127	22	5.73503261506355e-06	1.3699921873239999e-05	0.4251748741351766
GBRR3_HUMAN	111320	Iridocyclitis	781	11	0.7770020696447064	0.5445590343554376	0.8572519377855347
GBRR3_HUMAN	111320	Iritis	1272	17	0.5059586547438248	0.3970144469841813	0.8128524350317022
GBRR3_HUMAN	111320	JC virus test positive	700	4	0.023775281151276487	0.03167619559785772	0.3448714692240657
GBRR3_HUMAN	111320	Joint arthroplasty	773	12	1.0	0.6330520235558572	0.9462439260707609
GBRR3_HUMAN	111320	Joint destruction	665	10	1.0	0.6330520235558572	0.9161471090837775
GBRR3_HUMAN	111320	Joint lock	1149	17	0.8156074589640732	0.5642809837286199	0.901174740251578
GBRR3_HUMAN	111320	Joint warmth	539	8	1.0	0.6330520235558572	0.9040698402257994
GBRR3_HUMAN	111320	Juvenile arthritis	761	3	0.0036900829359938704	0.0059131472882980145	0.23749723870047793
GBRR3_HUMAN	111320	Kaposi's sarcoma	951	3	0.00027322275342437914	0.0005304035487393942	0.1898975811550235
GBRR3_HUMAN	111320	Kidney transplant rejection	2508	34	0.30575934906700397	0.26980046280908093	0.8246805222027375
GBRR3_HUMAN	111320	Knee arthroplasty	6554	105	0.8838456057116686	0.6020517359893955	0.9770199632072692
GBRR3_HUMAN	111320	Knee operation	2722	41	0.6504135128604398	0.47801567874847023	0.9176848420158465
GBRR3_HUMAN	111320	Latex allergy	605	7	0.42457714297140986	0.34778752705182503	0.7024305175834648
GBRR3_HUMAN	111320	Leukaemia	2982	35	0.04327371949179848	0.05356517163049635	0.7126797582540074
GBRR3_HUMAN	111320	Leukaemia recurrent	826	11	0.5836133915413133	0.44023080440506773	0.8099190087053517
GBRR3_HUMAN	111320	Limb malformation	528	6	0.49049079628148395	0.38806913713612123	0.6897429384481313
GBRR3_HUMAN	111320	Limb operation	1296	15	0.18941329771111542	0.18575275094410307	0.7026655227750284
GBRR3_HUMAN	111320	Lip dry	2675	35	0.19512449044675378	0.190059913256474	0.7955557755964243
GBRR3_HUMAN	111320	Lip pain	1155	18	1.0	0.6330520235558572	0.9499889548019118
GBRR3_HUMAN	111320	Lip swelling	13050	195	0.20162435311237964	0.19468303488302824	0.9102675185353984
GBRR3_HUMAN	111320	Lipoatrophy	551	3	0.04171567993183421	0.05192673482429371	0.32850895426088006
GBRR3_HUMAN	111320	Liquid product physical issue	658	5	0.08842508033534431	0.09925572290250646	0.45947653633221613
GBRR3_HUMAN	111320	Live birth	1673	21	0.24729307148054086	0.2290746787911413	0.7628089276905181
GBRR3_HUMAN	111320	Liver transplant	1763	22	0.22209720871182462	0.21024503482444756	0.7582814383628509
GBRR3_HUMAN	111320	Liver transplant rejection	922	12	0.5156807092935353	0.40286474411645956	0.7913094810328012
GBRR3_HUMAN	111320	Loss of control of legs	2457	37	0.6907056470549584	0.5003535133598024	0.9174721152332789
GBRR3_HUMAN	111320	Low turnover osteopathy	3646	19	1.3139795393563088e-09	4.280997021996286e-09	0.3143493458105214
GBRR3_HUMAN	111320	Lung transplant	979	5	0.0023208044636355485	0.0038645845599263764	0.30804741090855964
GBRR3_HUMAN	111320	Lupus-like syndrome	3431	25	4.194768529065913e-06	1.016792006410715e-05	0.4404553409056622
GBRR3_HUMAN	111320	Lymph node pain	772	12	1.0	0.6330520235558572	0.9474889838682224
GBRR3_HUMAN	111320	Lymphoproliferative disorder	915	14	0.8967072416421762	0.6094739875137771	0.9324160921529676
GBRR3_HUMAN	111320	Macular hole	553	7	0.615169075682406	0.45736870190704426	0.7693286621152233
GBRR3_HUMAN	111320	Macular oedema	2794	31	0.025138652392176636	0.03327891523887832	0.6732669942072421
GBRR3_HUMAN	111320	Maculopathy	1021	14	0.6208063537139682	0.46056513116723885	0.8342670298210764
GBRR3_HUMAN	111320	Madarosis	2033	9	1.1464183236965531e-06	2.9436345701856598e-06	0.26683237193917336
GBRR3_HUMAN	111320	Malignant melanoma	4401	65	0.4398278217366527	0.35749507683414444	0.8995609587002267
GBRR3_HUMAN	111320	Medical device complication	37086	99	1.006513682520945e-146	2.960535820668547e-145	0.16061740419211493
GBRR3_HUMAN	111320	Medical device discomfort	1851	10	3.1811327647055074e-05	6.991397236111058e-05	0.3259513071427888
GBRR3_HUMAN	111320	Medical device pain	1068	16	0.8099154548483845	0.5611165806763894	0.9126636599998088
GBRR3_HUMAN	111320	Medical device removal	968	13	0.6108846641866398	0.45484238435490404	0.8168578674186769
GBRR3_HUMAN	111320	Medication residue	2642	42	0.9388351075118141	0.6330520235558572	0.9693541142651815
GBRR3_HUMAN	111320	Meningitis bacterial	566	9	1.0	0.6330520235558572	0.9696027303498865
GBRR3_HUMAN	111320	Meningitis cryptococcal	526	4	0.1224194664788082	0.13008682193383767	0.45982862563208754
GBRR3_HUMAN	111320	Menometrorrhagia	900	9	0.14795162698525616	0.15161898390043524	0.6061377337877518
GBRR3_HUMAN	111320	Menorrhagia	12551	94	2.344636941717554e-18	1.2032018234961787e-17	0.45281510400809327
GBRR3_HUMAN	111320	Menstruation delayed	4946	15	3.7074401305096795e-19	1.9611877437805426e-18	0.1825419863465446
GBRR3_HUMAN	111320	Menstruation irregular	18408	72	2.1736799246400483e-57	2.7262311862727707e-56	0.23563207714000298
GBRR3_HUMAN	111320	Metrorrhagia	13650	67	5.082886716115669e-35	4.2500790211332425e-34	0.2959958468831744
GBRR3_HUMAN	111320	Middle ear effusion	816	13	1.0	0.6330520235558572	0.9714810253858487
GBRR3_HUMAN	111320	Mucous stools	970	15	1.0	0.6330520235558572	0.9425283085600118
GBRR3_HUMAN	111320	Multimorbidity	638	3	0.012212368910503844	0.01749445850479675	0.28350064084246024
GBRR3_HUMAN	111320	Multiple allergies	2296	37	1.0	0.6330520235558572	0.9828607874566334
GBRR3_HUMAN	111320	Multiple congenital abnormalities	975	10	0.16299930103460056	0.16416696937305958	0.62184078388588
GBRR3_HUMAN	111320	Multiple sclerosis	19272	311	0.820191360950679	0.5669311983518428	0.9842505503713458
GBRR3_HUMAN	111320	Multiple sclerosis relapse	31303	462	0.022840540723972118	0.030575142596820645	0.8989179231537301
GBRR3_HUMAN	111320	Musculoskeletal disorder	7033	105	0.37170992279785114	0.31460067011676984	0.9094690737187759
GBRR3_HUMAN	111320	Myasthenia gravis	1417	22	0.9165202900714456	0.6213362566471571	0.9463569779137802
GBRR3_HUMAN	111320	Mycobacterial infection	564	7	0.6165866645847367	0.4581645098829997	0.7541354569388006
GBRR3_HUMAN	111320	Mycobacterium avium complex infection	770	10	0.5692827461543858	0.43209175425322166	0.7895741532235188
GBRR3_HUMAN	111320	Myelodysplastic syndrome	6646	96	0.22677435079132302	0.21386864249510906	0.8795012247204264
GBRR3_HUMAN	111320	Myocardial infarction	118668	1655	7.844790222169618e-12	2.938113218478181e-11	0.8487316536833872
GBRR3_HUMAN	111320	Nail discolouration	1359	20	0.7479445350846154	0.5289662166664922	0.8963052374157943
GBRR3_HUMAN	111320	Nasal congestion	18401	234	5.246185549163465e-05	0.00011227733686950994	0.7729282072398886
GBRR3_HUMAN	111320	Nasal discomfort	3271	40	0.06257161067266404	0.07378428517106846	0.742898615227328
GBRR3_HUMAN	111320	Nasopharyngitis	59058	666	2.9146343128520706e-25	1.890147380272645e-24	0.6844274102541722
GBRR3_HUMAN	111320	Necrotising fasciitis	1193	19	1.0	0.6330520235558572	0.971162757457207
GBRR3_HUMAN	111320	Needle issue	2369	13	2.2476786196924945e-06	5.604741390826744e-06	0.33111174167437885
GBRR3_HUMAN	111320	Neoplasm malignant	21647	328	0.1553277335750688	0.1577536135923517	0.9232376983702743
GBRR3_HUMAN	111320	Neoplasm recurrence	1294	14	0.12475530690361727	0.13219744752033621	0.6563335148670499
GBRR3_HUMAN	111320	Nephropathy toxic	3525	52	0.506513094460231	0.39734264654478335	0.8984730934463997
GBRR3_HUMAN	111320	Nephrotic syndrome	2717	43	0.8799418572156356	0.5998219917923834	0.9649694587638217
GBRR3_HUMAN	111320	Neutrophil count abnormal	814	12	0.8896641021653313	0.6054175457959216	0.8978698600247494
GBRR3_HUMAN	111320	Nicotine dependence	4863	38	2.4030521149215156e-07	6.559401915348713e-07	0.4725989957532688
GBRR3_HUMAN	111320	No adverse event	40246	149	2.8493058927312334e-129	7.412227404772682e-128	0.22298769761087175
GBRR3_HUMAN	111320	Nocardiosis	621	3	0.0167020820592007	0.023158270192031895	0.2912992021601331
GBRR3_HUMAN	111320	Non-Hodgkin's lymphoma	2419	26	0.030001541307016093	0.03893087190739881	0.6519843404804316
GBRR3_HUMAN	111320	Normal newborn	2487	24	0.005617555565895608	0.008674098848458692	0.5847272657246034
GBRR3_HUMAN	111320	Obliterative bronchiolitis	552	5	0.23674953443923857	0.22126525268421027	0.5485158651278558
GBRR3_HUMAN	111320	Ocular hyperaemia	13811	198	0.060192163155265835	0.07130949140809761	0.872806277654265
GBRR3_HUMAN	111320	Ocular vascular disorder	515	8	1.0	0.6330520235558572	0.946866045680275
GBRR3_HUMAN	111320	Oesophageal carcinoma	1531	12	0.006202304254242429	0.009483467237574242	0.47405637112564125
GBRR3_HUMAN	111320	Oestrogen receptor assay positive	1338	9	0.00335000486392946	0.005411612803962167	0.40637225041752206
GBRR3_HUMAN	111320	Oligomenorrhoea	1273	5	5.8990750412550644e-05	0.00012542015980183274	0.2366231689471113
GBRR3_HUMAN	111320	Onychoclasis	1941	28	0.5908466994841708	0.44450416254555514	0.8783135379297689
GBRR3_HUMAN	111320	Open reduction of fracture	1143	10	0.046107300212783586	0.05665130548595147	0.5296349130184238
GBRR3_HUMAN	111320	Optic ischaemic neuropathy	1459	22	0.8361152948839763	0.5754024450057114	0.9186972750102459
GBRR3_HUMAN	111320	Optic neuritis	4570	74	1.0	0.6330520235558572	0.9876701596372486
GBRR3_HUMAN	111320	Oral herpes	5652	71	0.02108058196505732	0.02848281252440986	0.7634012060193707
GBRR3_HUMAN	111320	Oropharyngeal discomfort	1704	18	0.05618354091807082	0.06721956453477812	0.6406509143592963
GBRR3_HUMAN	111320	Ototoxicity	557	6	0.4011586332208778	0.3322223718847119	0.6534406785298086
GBRR3_HUMAN	111320	Ovarian cancer	3267	26	4.329962361074478e-05	9.363188649031038e-05	0.4813941767262181
GBRR3_HUMAN	111320	Ovarian cyst ruptured	595	8	0.7454145699290482	0.5277173461058671	0.8178212694376481
GBRR3_HUMAN	111320	Ovarian disorder	562	8	0.8675029267248955	0.5927696659941367	0.8665362548012625
GBRR3_HUMAN	111320	Ovarian hyperstimulation syndrome	728	5	0.039776327059913796	0.049838267726384736	0.41499056462646905
GBRR3_HUMAN	111320	Pain of skin	4372	68	0.7206372856791323	0.5170629801278211	0.9480760278483144
GBRR3_HUMAN	111320	Palmar-plantar erythrodysaesthesia syndrome	7595	102	0.04176803847568117	0.05198342011118218	0.8168662532748856
GBRR3_HUMAN	111320	Pancreatic carcinoma	6253	94	0.42532742552789515	0.34830614058015574	0.915849610428449
GBRR3_HUMAN	111320	Papilloedema	1940	29	0.7200426404776408	0.5167200682007073	0.9106339265853665
GBRR3_HUMAN	111320	Papilloma viral infection	585	2	0.008051142991766016	0.012012642286308904	0.20585809826753837
GBRR3_HUMAN	111320	Paranasal sinus hypersecretion	1894	17	0.008400024317281075	0.012481566694831	0.5434895077063325
GBRR3_HUMAN	111320	Pelvic inflammatory disease	848	9	0.22227800923238814	0.2103899542259402	0.6437052691357412
GBRR3_HUMAN	111320	Pelvic pain	9410	115	0.0009920618335005848	0.0017627406299381583	0.742429058544761
GBRR3_HUMAN	111320	Pemphigus	567	3	0.030548966503880906	0.03954222301802335	0.3191895513031246
GBRR3_HUMAN	111320	Penile pain	1767	11	0.00022930007712453445	0.00044998763180477327	0.37590204561210805
GBRR3_HUMAN	111320	Penile swelling	523	8	1.0	0.6330520235558572	0.9321574469124261
GBRR3_HUMAN	111320	Penis disorder	1514	12	0.006094222235936644	0.00933270605202427	0.4794218560185413
GBRR3_HUMAN	111320	Peritoneal dialysis complication	5513	11	7.124578802902526e-26	4.704145228770855e-25	0.11997164523716133
GBRR3_HUMAN	111320	Peritonitis	11195	145	0.0036329184963617934	0.005828712666865358	0.7874305129885227
GBRR3_HUMAN	111320	Peritonitis bacterial	5919	20	2.8678469865662124e-21	1.636412519890903e-20	0.20345019713506501
GBRR3_HUMAN	111320	Pharyngeal oedema	10661	171	0.8188120227065838	0.5661248444277819	0.9781988270059915
GBRR3_HUMAN	111320	Pharyngitis streptococcal	3677	46	0.06843545480509812	0.0798038625456748	0.7602179123297773
GBRR3_HUMAN	111320	Platelet count abnormal	1515	17	0.12796875342588518	0.13509577263499054	0.6809945300165462
GBRR3_HUMAN	111320	Polydactyly	530	7	0.7311368280168733	0.5215044507062369	0.8031614713478239
GBRR3_HUMAN	111320	Polymenorrhoea	1409	7	0.0002001435178378064	0.00039613379774342835	0.299610163705358
GBRR3_HUMAN	111320	Poor quality drug administered	4755	49	0.0005853037546253849	0.0010788654407561653	0.6248138858062864
GBRR3_HUMAN	111320	Poor venous access	2509	20	0.0003743349775197468	0.0007119252841995413	0.4821826889914618
GBRR3_HUMAN	111320	Post procedural discomfort	713	3	0.00478442667388041	0.007490630583199553	0.25355339004924266
GBRR3_HUMAN	111320	Postpartum haemorrhage	506	4	0.1595440789839853	0.16132128231533685	0.47814849119511893
GBRR3_HUMAN	111320	Pregnancy	15254	179	2.239169538395551e-06	5.584484964610611e-06	0.7125284763152736
GBRR3_HUMAN	111320	Pregnancy after post coital contraception	1172	1	1.9097637546594924e-07	5.259479286991908e-07	0.05124477851834964
GBRR3_HUMAN	111320	Pregnancy on contraceptive	659	5	0.08856037671097522	0.09938701198429811	0.4587739728210048
GBRR3_HUMAN	111320	Pregnancy on oral contraceptive	1961	8	7.163455853459104e-07	1.8748908049522225e-06	0.24580700725033253
GBRR3_HUMAN	111320	Pregnancy with contraceptive device	4896	8	6.555917276934773e-25	4.207547301363452e-24	0.09821216963173066
GBRR3_HUMAN	111320	Pregnancy with implant contraceptive	768	4	0.0097206940612386	0.014230313175928164	0.3141761028533373
GBRR3_HUMAN	111320	Premature rupture of membranes	1387	18	0.3959296002161057	0.3288349382106856	0.7889974007375995
GBRR3_HUMAN	111320	Premenstrual syndrome	807	11	0.6762846890361847	0.4922357438844781	0.8292512463503288
GBRR3_HUMAN	111320	Procedural pain	10501	142	0.018951901573664075	0.025879683387746343	0.8225778802575745
GBRR3_HUMAN	111320	Product colour issue	882	9	0.18257232632345977	0.18019357464327404	0.6186354190204889
GBRR3_HUMAN	111320	Product container issue	1440	4	1.2809134252916444e-06	3.2729586546311035e-06	0.16715218842614885
GBRR3_HUMAN	111320	Product expiration date issue	513	1	0.004444631673802298	0.007010848582956398	0.11720241336911608
GBRR3_HUMAN	111320	Product label confusion	779	8	0.20431867533907871	0.1966718558736409	0.6226473218675739
GBRR3_HUMAN	111320	Product label issue	1544	15	0.035044296285624416	0.044614618450275284	0.588694921304651
GBRR3_HUMAN	111320	Product lot number issue	611	1	0.0010943493277000133	0.0019301219890823285	0.09837317318850398
GBRR3_HUMAN	111320	Product odour abnormal	1950	16	0.0030531118053445682	0.004975594025719912	0.49644372819017524
GBRR3_HUMAN	111320	Product packaging issue	2085	28	0.34164459152998883	0.2944943350579436	0.8168273203984676
GBRR3_HUMAN	111320	Product quality issue	97143	1152	6.20644116697082e-32	4.830890296314846e-31	0.7201591426594735
GBRR3_HUMAN	111320	Product size issue	1258	9	0.0072083390027448575	0.010869382887331011	0.43240089736179893
GBRR3_HUMAN	111320	Product substitution issue	18889	220	7.71770866311525e-08	2.1972808703809008e-07	0.7071444556161139
GBRR3_HUMAN	111320	Product taste abnormal	3091	30	0.002239384284640206	0.0037406542199320035	0.588117957971128
GBRR3_HUMAN	111320	Progesterone receptor assay positive	1122	8	0.009487214367056959	0.01392246500194342	0.4309345468221718
GBRR3_HUMAN	111320	Prostate cancer	7253	106	0.24736392916698202	0.22913319756207887	0.8899971146451193
GBRR3_HUMAN	111320	Prostatic specific antigen increased	4026	65	0.9505339314269695	0.6330520235558572	0.9847251494380669
GBRR3_HUMAN	111320	Pruritus generalised	14405	231	0.7675235222778523	0.5400651501148326	0.9779712031883799
GBRR3_HUMAN	111320	Pruritus genital	923	7	0.03638114182484994	0.04609022933895589	0.4585736348416069
GBRR3_HUMAN	111320	Psoriasis	38747	309	1.64886136162762e-47	1.767501015676884e-46	0.48239657147357085
GBRR3_HUMAN	111320	Psoriatic arthropathy	6687	38	3.34098060949841e-15	1.4966168987748848e-14	0.342952346895702
GBRR3_HUMAN	111320	Pulmonary arterial hypertension	5300	75	0.21311695154627128	0.20325719495297995	0.861353621698384
GBRR3_HUMAN	111320	Pulmonary toxicity	1615	19	0.1687158257024509	0.16885681732901578	0.7143766148212789
GBRR3_HUMAN	111320	Pulmonary tuberculosis	2096	23	0.04779386241787487	0.05848538165302813	0.6657865990519588
GBRR3_HUMAN	111320	Pustular psoriasis	1519	20	0.3634154165400514	0.3088517543251569	0.8006355656435947
GBRR3_HUMAN	111320	Pyloric stenosis	501	7	0.8596754465805667	0.5883760917668344	0.8503106265484047
GBRR3_HUMAN	111320	Quality of life decreased	6168	79	0.02708364568745058	0.035534425635401774	0.7785520144447375
GBRR3_HUMAN	111320	Rash	134667	2117	0.049788624372882076	0.06066093502210831	0.9584018457973472
GBRR3_HUMAN	111320	Rash pruritic	20005	272	0.0014741381243137362	0.002544184968981207	0.8271462471715694
GBRR3_HUMAN	111320	Rectal abscess	613	8	0.6333269593253282	0.4679679161148851	0.7934893969585115
GBRR3_HUMAN	111320	Rectal discharge	2620	5	4.722214869591732e-13	1.8962285791272006e-12	0.11473735304968914
GBRR3_HUMAN	111320	Rehabilitation therapy	659	5	0.08856037671097522	0.09938701198429811	0.4587739728210048
GBRR3_HUMAN	111320	Renal cell carcinoma	3313	53	0.9453816712621145	0.6330520235558572	0.9755842604859919
GBRR3_HUMAN	111320	Renal neoplasm	731	5	0.039903949451603	0.04997856101954312	0.41327572758255804
GBRR3_HUMAN	111320	Renal transplant	1532	20	0.3640197780296591	0.3092682590764408	0.7937517942458654
GBRR3_HUMAN	111320	Respiratory syncytial virus infection	1299	13	0.07892579649902365	0.08987852004109684	0.6066090695060936
GBRR3_HUMAN	111320	Respiratory tract congestion	6510	81	0.011005796870606193	0.015921667348644045	0.7560458060731033
GBRR3_HUMAN	111320	Retinal artery occlusion	868	11	0.5019226788665899	0.3949229081426717	0.7702263618376448
GBRR3_HUMAN	111320	Retinal detachment	3678	52	0.32922157919829764	0.28618543570525806	0.8605617908271775
GBRR3_HUMAN	111320	Retinal disorder	1307	19	0.7429161015060608	0.5263503087621513	0.8852058053220194
GBRR3_HUMAN	111320	Retinal exudates	594	6	0.32794603914815973	0.2853239898750688	0.6123228127039533
GBRR3_HUMAN	111320	Retinal oedema	814	9	0.26972485693099246	0.24520441539181137	0.6708928208756358
GBRR3_HUMAN	111320	Rheumatoid arthritis	29566	367	2.0739925466040285e-08	6.181570594491967e-08	0.7542313874348568
GBRR3_HUMAN	111320	Rheumatoid factor increased	541	3	0.04119554311101856	0.05137352406040851	0.3346150686523462
GBRR3_HUMAN	111320	Rheumatoid nodule	732	8	0.30661557417906116	0.27037539587067516	0.6630677971821816
GBRR3_HUMAN	111320	Rhinalgia	743	9	0.46788684516067447	0.3740245906217865	0.7357884479630611
GBRR3_HUMAN	111320	Rotator cuff repair	757	10	0.6656350663526847	0.4867960559821784	0.8033150688753337
GBRR3_HUMAN	111320	Salmonellosis	521	4	0.16257881405789576	0.16381818301078893	0.4642757109863631
GBRR3_HUMAN	111320	Scleral hyperaemia	588	1	0.0015677112890856155	0.0026926299304844887	0.10222765867970601
GBRR3_HUMAN	111320	Scotoma	841	11	0.5851042762352356	0.4411262970912788	0.7952819181865802
GBRR3_HUMAN	111320	Seborrhoea	623	8	0.6342866741170294	0.4685913244738175	0.7805871303412999
GBRR3_HUMAN	111320	Secretion discharge	2793	38	0.2957946364984863	0.2631668510241213	0.8276915261377575
GBRR3_HUMAN	111320	Semen volume decreased	732	2	0.0010966021553774573	0.0019337891771145177	0.16440448121914364
GBRR3_HUMAN	111320	Serum sickness	1407	18	0.3436244630936039	0.2957001075781238	0.7776367470192754
GBRR3_HUMAN	111320	Shoulder arthroplasty	642	7	0.34936371661319715	0.29932959574756773	0.6615014952990739
GBRR3_HUMAN	111320	Shoulder operation	1101	13	0.28379307923988073	0.25460095366374474	0.7170029994345923
GBRR3_HUMAN	111320	Sickle cell anaemia with crisis	1569	12	0.003766809723806881	0.006025810488550421	0.46248659456637703
GBRR3_HUMAN	111320	Sinus congestion	5863	92	0.718701014826908	0.5159501307317356	0.9566283970436393
GBRR3_HUMAN	111320	Skin depigmentation	502	8	1.0	0.6330520235558572	0.971783573198177
GBRR3_HUMAN	111320	Skin fissures	2966	41	0.31058799095154627	0.27309304473258117	0.8411326705793108
GBRR3_HUMAN	111320	Skin hyperpigmentation	2292	35	0.7421184420816003	0.5258991173219161	0.9305570436750377
GBRR3_HUMAN	111320	Skin irritation	5336	71	0.08397304262527501	0.09486742350433816	0.8092197779286053
GBRR3_HUMAN	111320	Skin mass	1665	23	0.4980723503197788	0.39260552580024516	0.8405454444791174
GBRR3_HUMAN	111320	Skin odour abnormal	1706	24	0.50477349445496	0.3963315626893906	0.8562326132459561
GBRR3_HUMAN	111320	Skin plaque	2262	20	0.0027937165856779444	0.004584183104003003	0.5353045106600127
GBRR3_HUMAN	111320	Skin reaction	4749	52	0.002385651396411447	0.003963978756512602	0.6643383124418449
GBRR3_HUMAN	111320	Skin swelling	996	13	0.5307016986923961	0.41102881252299106	0.7935902984586333
GBRR3_HUMAN	111320	Skin toxicity	1336	11	0.016991216402280462	0.023511415160541775	0.4981765978074428
GBRR3_HUMAN	111320	Skin wrinkling	895	11	0.42764261922921853	0.3498691474686609	0.7467013485235992
GBRR3_HUMAN	111320	Sleep disorder due to a general medical condition	1046	6	0.0032526809400530727	0.005267960816997088	0.3461978979518505
GBRR3_HUMAN	111320	Small intestinal haemorrhage	857	14	1.0	0.6330520235558572	0.9965680890033498
GBRR3_HUMAN	111320	Small intestinal perforation	709	11	1.0	0.6330520235558572	0.9456790717691428
GBRR3_HUMAN	111320	Smear cervix abnormal	942	13	0.698812703342176	0.5047388959524687	0.8397193362592427
GBRR3_HUMAN	111320	Sneezing	7283	102	0.11621115139515742	0.12446109656693367	0.8523574482368357
GBRR3_HUMAN	111320	Speech disorder developmental	793	9	0.3263145207006304	0.284210633943289	0.6888631642919475
GBRR3_HUMAN	111320	Spina bifida	1083	14	0.47091154761498405	0.37584531806781774	0.7858811029278053
GBRR3_HUMAN	111320	Splenectomy	689	10	0.8801220518624864	0.5999156354653878	0.8837648843149841
GBRR3_HUMAN	111320	Steatorrhoea	1565	9	0.00029322590311858245	0.0005666646836686839	0.3470878668411869
GBRR3_HUMAN	111320	Stent placement	4120	58	0.2688864458643787	0.2445975207408897	0.8568298541135575
GBRR3_HUMAN	111320	Stillbirth	2293	27	0.08385591487489408	0.09474829864910816	0.7150071325748721
GBRR3_HUMAN	111320	Sunburn	3306	36	0.011046257632733415	0.015975526839776037	0.6606345208622469
GBRR3_HUMAN	111320	Superior sagittal sinus thrombosis	529	5	0.299601575383447	0.2658269070940861	0.572591943177361
GBRR3_HUMAN	111320	Syringe issue	1234	11	0.04218436909069285	0.05241752948325237	0.5397252592762565
GBRR3_HUMAN	111320	Talipes	1765	23	0.30214787362960804	0.26747992278957716	0.79229369680523
GBRR3_HUMAN	111320	Tardive dyskinesia	21357	299	0.005417074225805776	0.008392786319371593	0.852041174748373
GBRR3_HUMAN	111320	Tendon disorder	2961	47	0.8849528528789423	0.6027052572231095	0.9678650910481842
GBRR3_HUMAN	111320	Tendon injury	2071	30	0.5450504837575667	0.41778701880268243	0.882032861023823
GBRR3_HUMAN	111320	Tendon pain	2669	19	3.486797074616748e-05	7.626686055088216e-05	0.4302434253791551
GBRR3_HUMAN	111320	Tendon rupture	5987	89	0.38644138591413263	0.3234427002342141	0.9055068790104918
GBRR3_HUMAN	111320	Testicular disorder	567	3	0.030548966503880906	0.03954222301802335	0.3191895513031246
GBRR3_HUMAN	111320	Therapeutic response decreased	22464	266	1.9843671113776625e-08	5.9234965998886916e-08	0.7190751906282843
GBRR3_HUMAN	111320	Therapeutic response unexpected with drug substitution	4252	61	0.3332160676721392	0.28895852653832055	0.873411065221721
GBRR3_HUMAN	111320	Throat irritation	15974	196	2.163553555256803e-05	4.8508288929891145e-05	0.7454364676395954
GBRR3_HUMAN	111320	Thrombotic thrombocytopenic purpura	2090	30	0.5456794148966073	0.41813845061748617	0.8738976064803993
GBRR3_HUMAN	111320	Thyroidectomy	650	10	1.0	0.6330520235558572	0.9376193069529285
GBRR3_HUMAN	111320	Thyroiditis	664	10	1.0	0.6330520235558572	0.9175479456420096
GBRR3_HUMAN	111320	Tonsillectomy	867	6	0.022369958868941584	0.03001520004679922	0.41817167696855345
GBRR3_HUMAN	111320	Toxic anterior segment syndrome	524	2	0.01509277413802659	0.02114211456490828	0.22991431281604377
GBRR3_HUMAN	111320	Transfusion	3615	43	0.03053843894846066	0.03953080990571929	0.7223763529491768
GBRR3_HUMAN	111320	Transmission of an infectious agent via a medicinal product	961	3	0.00018902607090206855	0.0003755815192021254	0.1879153517066412
GBRR3_HUMAN	111320	Transplant	927	5	0.004172930893691782	0.006621301169702416	0.3254210175975457
GBRR3_HUMAN	111320	Transplant failure	1024	7	0.012988060971848929	0.01848178191680772	0.41303190709430865
GBRR3_HUMAN	111320	Transplant rejection	2628	30	0.045250617145694796	0.05571634914908919	0.6929288180714482
GBRR3_HUMAN	111320	Trichorrhexis	1093	6	0.0018323376647908006	0.0031101280516937745	0.33122889960434637
GBRR3_HUMAN	111320	Trisomy 21	699	11	1.0	0.6330520235558572	0.9594244071146245
GBRR3_HUMAN	111320	Tuberculin test positive	1573	14	0.0166245493243179	0.023061775600275843	0.5388754964912276
GBRR3_HUMAN	111320	Tuberculosis	4926	60	0.01826430843539975	0.02505190190074512	0.7399215245991051
GBRR3_HUMAN	111320	Tumour lysis syndrome	2415	34	0.42237811459238894	0.346246411676361	0.856891899172437
GBRR3_HUMAN	111320	Twin pregnancy	545	7	0.7335847103697707	0.5221617937352102	0.7807684935221411
GBRR3_HUMAN	111320	Type IV hypersensitivity reaction	769	11	0.7762407303307834	0.5444031609785459	0.870823208568419
GBRR3_HUMAN	111320	Ulcerative keratitis	1080	9	0.04005821318837938	0.0501503337321423	0.5042658457561968
GBRR3_HUMAN	111320	Underdose	17323	140	1.8723121938352317e-21	1.0750889140576469e-20	0.4889174760110714
GBRR3_HUMAN	111320	Unintended pregnancy	5195	14	1.807393696989294e-21	1.0383417838222136e-20	0.16215149566296544
GBRR3_HUMAN	111320	Urine flow decreased	1176	18	0.9083096321587634	0.6163742827752264	0.9327611758288201
GBRR3_HUMAN	111320	Urticaria	57528	747	2.355498192876421e-11	8.57941976753341e-11	0.7894490027791974
GBRR3_HUMAN	111320	Uterine dilation and curettage	560	7	0.6159266437475788	0.4577938653397131	0.759590324620094
GBRR3_HUMAN	111320	Uterine perforation	5692	33	7.797294859977676e-13	3.093920645540623e-12	0.3499296653621815
GBRR3_HUMAN	111320	Uterine rupture	1251	5	8.08624310811947e-05	0.00016896335204625342	0.24080110611953218
GBRR3_HUMAN	111320	Uterine spasm	884	4	0.002121814058983151	0.0035614481667469314	0.27276198020448833
GBRR3_HUMAN	111320	Uveitis	2928	27	0.0013051770095191904	0.002272023210665214	0.5584991942139471
GBRR3_HUMAN	111320	Vaginal discharge	4638	58	0.03704949386702104	0.04680720426226646	0.7599220234518057
GBRR3_HUMAN	111320	Vaginal haemorrhage	18961	144	2.2748074496590217e-26	1.5234291965978116e-25	0.4592177038251682
GBRR3_HUMAN	111320	Vaginal odour	633	10	1.0	0.6330520235558572	0.9632044244781287
GBRR3_HUMAN	111320	Vascular graft	2282	28	0.13690656681351548	0.1428261037578596	0.7454364676395953
GBRR3_HUMAN	111320	Vascular rupture	699	9	0.552394646204431	0.42204539076095016	0.7827082910215751
GBRR3_HUMAN	111320	Venoocclusive disease	783	9	0.3258260535701929	0.28387323841169615	0.6977632051742725
GBRR3_HUMAN	111320	Venoocclusive liver disease	1374	10	0.005367365998430837	0.008322755482903062	0.43993867774917467
GBRR3_HUMAN	111320	Viral load increased	1378	19	0.5239280883703847	0.40783224304717314	0.8389588500770868
GBRR3_HUMAN	111320	Virologic failure	707	3	0.006784724709707556	0.01028617380475406	0.25571435644170776
GBRR3_HUMAN	111320	Vitreous haemorrhage	1224	15	0.30958528273132213	0.27240465611246756	0.7445116084986032
GBRR3_HUMAN	111320	Vulvovaginal burning sensation	1811	18	0.02622560523138782	0.034532544595651166	0.6024190973841459
GBRR3_HUMAN	111320	Vulvovaginal discomfort	1608	16	0.03883960907108594	0.0488001541241422	0.6030918155275119
GBRR3_HUMAN	111320	Vulvovaginal pain	1509	16	0.0837211556178289	0.09461280020669334	0.643082498539718
GBRR3_HUMAN	111320	Vulvovaginal pruritus	1618	23	0.5569387055131805	0.4246885180008712	0.8653138682349284
GBRR3_HUMAN	111320	White blood cell count abnormal	1528	18	0.1886850760114422	0.1851865560139715	0.7153228090130952
GBRR3_HUMAN	111320	Wrong drug administered	9386	125	0.018222166210244077	0.025003638569144348	0.8099508104549646
A9UF02_HUMAN	29221	Abasia	22742	67	0.0011442680645828113	0.002010640042799633	0.6837812198541571
A9UF02_HUMAN	29221	Abdominal hernia	1888	5	0.37567425664195475	0.3171272129740396	0.6144822552212257
A9UF02_HUMAN	29221	Abdominal infection	820	1	0.27805663517330503	0.2506332102269845	0.2825567977000166
A9UF02_HUMAN	29221	Abdominal pain lower	11078	34	0.04928709424625144	0.060118599157611384	0.7124299700067604
A9UF02_HUMAN	29221	Abdominal rigidity	1085	3	0.640036544905215	0.4718172648841421	0.6416285138160267
A9UF02_HUMAN	29221	Abdominal wall haematoma	733	1	0.38756436776435466	0.3240992761146337	0.3161393679184612
A9UF02_HUMAN	29221	Abnormal behaviour	22907	25	1.3597925835218696e-18	7.04130617236422e-18	0.2528341243295097
A9UF02_HUMAN	29221	Abnormal dreams	16717	9	1.4840539539015196e-20	8.261368042238218e-20	0.12465442637340331
A9UF02_HUMAN	29221	Abnormal loss of weight	2334	2	0.00616941702109302	0.00943728133452501	0.198468282432516
A9UF02_HUMAN	29221	Abnormal sensation in eye	2403	8	0.6375794673876907	0.4706178690118439	0.7729904545012564
A9UF02_HUMAN	29221	Abortion missed	784	2	0.7803033863904427	0.5457559278026138	0.5918517066913392
A9UF02_HUMAN	29221	Abscess jaw	623	2	1.0	0.6330520235558572	0.7452947417594642
A9UF02_HUMAN	29221	Abscess limb	1279	3	0.39119200763664286	0.3261725934435992	0.544076843220173
A9UF02_HUMAN	29221	Accidental death	1062	4	1.0	0.6330520235558572	0.8749112185871971
A9UF02_HUMAN	29221	Accidental drug intake by child	1604	2	0.05586040765504074	0.06691335183288234	0.2889063886595676
A9UF02_HUMAN	29221	Accidental exposure	7071	1	4.14380749591225e-12	1.57749179984995e-11	0.03273182706029896
A9UF02_HUMAN	29221	Accidental overdose	12741	15	4.3497345670957215e-10	1.4633682497328578e-09	0.27276522550249127
A9UF02_HUMAN	29221	Acidosis	3652	7	0.0222278326044485	0.029844522928190967	0.444416494160273
A9UF02_HUMAN	29221	Acne	11468	23	4.299155582511263e-05	9.299820821517907e-05	0.4650521973154402
A9UF02_HUMAN	29221	Actinomycosis	605	1	0.5305897192358028	0.41099358015419746	0.38313579025879735
A9UF02_HUMAN	29221	Activities of daily living impaired	18898	22	1.1975279953125596e-14	5.2208049832022575e-14	0.2697133068954704
A9UF02_HUMAN	29221	Acute generalised exanthematous pustulosis	2581	5	0.06933912306498627	0.08071725832874704	0.4491731702568199
A9UF02_HUMAN	29221	Acute hepatic failure	4809	19	0.8252555812905822	0.5693915918150684	0.9179261647202418
A9UF02_HUMAN	29221	Acute myocardial infarction	16701	62	0.26075852111589226	0.23881294523118168	0.8622915483870092
A9UF02_HUMAN	29221	Acute psychosis	1090	1	0.10124285227562446	0.11118734547565504	0.21250139331158277
A9UF02_HUMAN	29221	Acute sinusitis	929	2	0.4519451271925006	0.36503854168206246	0.4992751182660488
A9UF02_HUMAN	29221	Adenovirus infection	590	2	1.0	0.6330520235558572	0.7871225078786178
A9UF02_HUMAN	29221	Adrenal insufficiency	2535	5	0.09150186975966777	0.10220486736919782	0.4573399551705803
A9UF02_HUMAN	29221	Adverse drug reaction	19971	18	9.41990520902714e-19	4.90665760010498e-18	0.20876320912612867
A9UF02_HUMAN	29221	Adverse event	38127	14	7.213468860955892e-52	8.301495401529395e-51	0.08500501777420803
A9UF02_HUMAN	29221	Adverse reaction	3858	1	1.789623940422131e-06	4.506311873313845e-06	0.05999844887641006
A9UF02_HUMAN	29221	Affect lability	3286	4	0.003059144093120101	0.0049845833434327335	0.2820402404830148
A9UF02_HUMAN	29221	Affective disorder	2534	5	0.09145234406874402	0.10215528906599225	0.45752079342885255
A9UF02_HUMAN	29221	Ageusia	9593	26	0.01520152370473572	0.021277663640813214	0.6289081687283531
A9UF02_HUMAN	29221	Aggression	25619	26	8.397518538996224e-22	4.878143765682938e-21	0.23509414489212496
A9UF02_HUMAN	29221	Agitation	35271	33	1.9682867037772983e-31	1.5129061773599508e-30	0.21671668572104966
A9UF02_HUMAN	29221	Akinesia	855	3	1.0	0.6330520235558572	0.8148380891419492
A9UF02_HUMAN	29221	Alanine aminotransferase abnormal	619	2	1.0	0.6330520235558572	0.7501264742830264
A9UF02_HUMAN	29221	Alcohol abuse	1090	2	0.3463341102839408	0.29736595463841164	0.4253934141844001
A9UF02_HUMAN	29221	Alcohol interaction	850	1	0.2830486022153633	0.2540843489956841	0.2725724585586733
A9UF02_HUMAN	29221	Alcohol poisoning	1356	4	0.6743079644507882	0.4911896938929905	0.6846568559654249
A9UF02_HUMAN	29221	Alcohol use	3207	1	3.310288256170967e-05	7.259874075537963e-05	0.07218154002380338
A9UF02_HUMAN	29221	Alcoholism	1478	4	0.5457838177663822	0.4181975884243568	0.6279891921745282
A9UF02_HUMAN	29221	Allergic granulomatous angiitis	867	1	0.1969692654405838	0.19148148159477418	0.26722172900267166
A9UF02_HUMAN	29221	Alopecia	48806	167	0.0022479818730782985	0.0037535435785101367	0.794550481955311
A9UF02_HUMAN	29221	Amenorrhoea	8729	9	4.581649481576075e-08	1.3291817752280926e-07	0.23884474264298425
A9UF02_HUMAN	29221	Ammonia increased	2370	5	0.11507149372590213	0.12343196372838844	0.48924739390341143
A9UF02_HUMAN	29221	Amnesia	30172	82	8.135704845959833e-06	1.911846516759786e-05	0.6306397281468168
A9UF02_HUMAN	29221	Anaemia postoperative	1092	2	0.34663930409291516	0.29755491145513385	0.42461287580974977
A9UF02_HUMAN	29221	Anal pruritus	1536	1	0.018129528072720093	0.02489717994021319	0.15075831746991117
A9UF02_HUMAN	29221	Anaphylactic reaction	17883	13	3.4701608130870774e-19	1.837635817466481e-18	0.1683481939066635
A9UF02_HUMAN	29221	Anaphylactic shock	9422	8	1.1850685484210082e-09	3.8720878688799985e-09	0.19665520910670373
A9UF02_HUMAN	29221	Anaphylactoid reaction	2208	2	0.008299126772601823	0.012344236500121907	0.20980418614353002
A9UF02_HUMAN	29221	Aneurysm	2327	8	0.6352716130600472	0.46919140275818266	0.7983234750023755
A9UF02_HUMAN	29221	Anger	16280	7	1.1467911862020344e-21	6.629000606276315e-21	0.09954514356382936
A9UF02_HUMAN	29221	Angina pectoris	15254	53	0.12158774384737331	0.12935378493866692	0.806851057020237
A9UF02_HUMAN	29221	Angina unstable	4590	6	0.0006219931890784921	0.0011421324424879824	0.30289792842449426
A9UF02_HUMAN	29221	Angioedema	18895	51	0.0004369122209702764	0.0008219929505752975	0.6263062451248139
A9UF02_HUMAN	29221	Angle closure glaucoma	1196	2	0.26093705847302506	0.23893220620706437	0.38762816970906805
A9UF02_HUMAN	29221	Anhedonia	10520	5	8.224189512995098e-14	3.438049120251703e-13	0.11003995117275969
A9UF02_HUMAN	29221	Animal bite	942	4	1.0	0.6330520235558572	0.9868401591314013
A9UF02_HUMAN	29221	Anion gap increased	525	2	1.0	0.6330520235558572	0.8849484409801669
A9UF02_HUMAN	29221	Ankle fracture	6288	18	0.08247398412113782	0.09337242092943707	0.6643464611951587
A9UF02_HUMAN	29221	Ankylosing spondylitis	2087	2	0.011351629334095292	0.016376585178562306	0.2219798727254807
A9UF02_HUMAN	29221	Anorectal discomfort	3403	7	0.04760265852102466	0.05827827832816638	0.4770018024776782
A9UF02_HUMAN	29221	Anosmia	7019	6	2.0916346465264867e-07	5.740311911653192e-07	0.19798718150547293
A9UF02_HUMAN	29221	Anoxic encephalopathy	735	2	0.7764435742465041	0.544426915976584	0.6314161454742527
A9UF02_HUMAN	29221	Antepartum haemorrhage	882	2	0.6001541765267477	0.4488026235180792	0.5259409484461673
A9UF02_HUMAN	29221	Antibody test positive	949	2	0.4531923438212914	0.3655458460094021	0.4887307651875684
A9UF02_HUMAN	29221	Antinuclear antibody positive	2216	9	1.0	0.6330520235558572	0.9436910538499422
A9UF02_HUMAN	29221	Antiphospholipid syndrome	588	2	1.0	0.6330520235558572	0.789808932820183
A9UF02_HUMAN	29221	Antisocial behaviour	539	1	0.7350192627926866	0.5226689338300142	0.430137578654858
A9UF02_HUMAN	29221	Anxiety	113430	152	9.244912458717238e-72	1.4070786389657453e-70	0.3105186411490286
A9UF02_HUMAN	29221	Anxiety disorder	1387	4	0.5400678267630766	0.415364327358803	0.6693102453111023
A9UF02_HUMAN	29221	Aortic aneurysm rupture	515	1	0.7317388690033927	0.5216196889036933	0.45022182357259455
A9UF02_HUMAN	29221	Aortic disorder	506	2	1.0	0.6330520235558572	0.9183095925250541
A9UF02_HUMAN	29221	Apathy	5898	5	2.0323101170907945e-06	5.08853275891013e-06	0.19634652750408418
A9UF02_HUMAN	29221	Aphonia	4520	12	0.10950284476037121	0.11833155081560036	0.6160089192093531
A9UF02_HUMAN	29221	Aphthous stomatitis	2972	12	1.0	0.6330520235558572	0.9381649350661363
A9UF02_HUMAN	29221	Apnoea	4105	6	0.0026112972658685956	0.004308171972276807	0.33873727833566275
A9UF02_HUMAN	29221	Appendicitis perforated	1061	4	1.0	0.6330520235558572	0.8757389491629655
A9UF02_HUMAN	29221	Appendix disorder	645	1	0.5370988647457491	0.41394516639147466	0.3593385362054559
A9UF02_HUMAN	29221	Application site burn	2501	2	0.0031396548290596473	0.0051031772281845906	0.18520529597143948
A9UF02_HUMAN	29221	Application site erythema	13868	1	1.0569405308597313e-24	6.739262835063509e-24	0.016688109707673874
A9UF02_HUMAN	29221	Application site pain	8148	1	3.391013424258448e-14	1.446823813813508e-13	0.028404813712570715
A9UF02_HUMAN	29221	Application site reaction	4835	1	3.399722907984992e-08	9.963353920447743e-08	0.04787215914694118
A9UF02_HUMAN	29221	Apraxia	611	2	1.0	0.6330520235558572	0.7599803524345276
A9UF02_HUMAN	29221	Arrhythmia	21966	78	0.09810431908242159	0.10841816058888691	0.8246661801294071
A9UF02_HUMAN	29221	Arterial occlusive disease	4263	16	0.7244416677208054	0.5192123913518939	0.8718211153899266
A9UF02_HUMAN	29221	Arteriosclerosis	5826	22	0.6165084579472351	0.4581215081433081	0.8771723606062887
A9UF02_HUMAN	29221	Arteriosclerosis coronary artery	4446	16	0.565891066609991	0.43007412507733245	0.8358068345510198
A9UF02_HUMAN	29221	Arteriospasm coronary	1497	2	0.10778314115601759	0.1167776781232835	0.30958396965393126
A9UF02_HUMAN	29221	Arthralgia	132818	458	7.971389805155512e-07	2.0775011713828336e-06	0.8007526437811396
A9UF02_HUMAN	29221	Arthritis	28086	75	8.95111434200049e-06	2.0945344222052084e-05	0.6196155545579779
A9UF02_HUMAN	29221	Arthritis bacterial	1605	5	0.699552730229853	0.5051607479200911	0.7231688041134801
A9UF02_HUMAN	29221	Arthritis infective	1591	3	0.17712976199975866	0.17579733010515025	0.43718013346910634
A9UF02_HUMAN	29221	Arthropathy	18202	22	9.167231387931731e-14	3.823465654404385e-13	0.28003896484922436
A9UF02_HUMAN	29221	Arthropod bite	2803	11	0.8853803908678004	0.6029233908967441	0.9117314435814649
A9UF02_HUMAN	29221	Asphyxia	2964	11	0.7780158630485079	0.5448484223842212	0.8620230919334405
A9UF02_HUMAN	29221	Aspiration	4683	16	0.43304492451906507	0.35317308550877885	0.793362819168849
A9UF02_HUMAN	29221	Asthma	29308	72	1.9608625777292961e-07	5.394811829416278e-07	0.5699072802973929
A9UF02_HUMAN	29221	Asthmatic crisis	1015	1	0.14328213385881367	0.1479249109068544	0.22821895198847497
A9UF02_HUMAN	29221	Ataxia	5246	16	0.20361474431272553	0.19614158663346584	0.7079587527841334
A9UF02_HUMAN	29221	Atrial septal defect	4691	6	0.00046593417743236116	0.0008730295221546732	0.29636800510093525
A9UF02_HUMAN	29221	Atrioventricular block	3451	13	0.7937694779183908	0.5529152275629473	0.8750384598929835
A9UF02_HUMAN	29221	Atrioventricular block complete	3117	12	0.8905093481748305	0.6058678787891297	0.8943536901113569
A9UF02_HUMAN	29221	Atrioventricular block first degree	2330	6	0.2648471785961811	0.24181495075309856	0.5974544336909989
A9UF02_HUMAN	29221	Atrioventricular block second degree	1555	4	0.4336834820944453	0.35357581861431736	0.5968124237687005
A9UF02_HUMAN	29221	Atrophy	1088	2	0.3460360440132393	0.29717345944046847	0.42617682747019087
A9UF02_HUMAN	29221	Attention deficit/hyperactivity disorder	2231	4	0.07333240628923285	0.08458537405173665	0.4156515802717802
A9UF02_HUMAN	29221	Aura	797	2	0.7817609507776119	0.5464343796788025	0.5821736284687136
A9UF02_HUMAN	29221	Auricular swelling	1000	3	0.8063602955150335	0.5593526285927058	0.6963310450841934
A9UF02_HUMAN	29221	Autoimmune disorder	1939	2	0.02202964327159747	0.029612625994777972	0.23894064771947715
A9UF02_HUMAN	29221	Autoimmune thyroiditis	1140	2	0.25547393513065375	0.23510669400974663	0.40670301813060394
A9UF02_HUMAN	29221	Autonomic nervous system imbalance	1051	4	1.0	0.6330520235558572	0.8841032180183902
A9UF02_HUMAN	29221	Back disorder	6467	9	5.742460997828802e-05	0.00012225991726231712	0.3225032759131035
A9UF02_HUMAN	29221	Back injury	3965	16	0.9034904948807254	0.6134867798673095	0.9376106044722761
A9UF02_HUMAN	29221	Back pain	89475	265	8.594243965018504e-11	3.0226430870402524e-10	0.6874197353303789
A9UF02_HUMAN	29221	Bacterial infection	6888	29	1.0	0.6330520235558572	0.9784234585468864
A9UF02_HUMAN	29221	Bacterial test positive	863	3	1.0	0.6330520235558572	0.807258199940629
A9UF02_HUMAN	29221	Balance disorder	35264	47	3.1299797297954384e-23	1.9057645718487255e-22	0.30884115097443676
A9UF02_HUMAN	29221	Bedridden	5376	3	3.5772394302075645e-07	9.620988181249128e-07	0.12920938990302266
A9UF02_HUMAN	29221	Benign breast neoplasm	548	2	1.0	0.6330520235558572	0.8476703931000499
A9UF02_HUMAN	29221	Benign intracranial hypertension	1161	3	0.5018579474688891	0.3948937374880159	0.599518179575942
A9UF02_HUMAN	29221	Beta haemolytic streptococcal infection	597	2	1.0	0.6330520235558572	0.7778622430800458
A9UF02_HUMAN	29221	Bile duct stenosis	537	1	0.7347058497875079	0.52254603164305	0.4317425696199881
A9UF02_HUMAN	29221	Biliary colic	1133	3	0.6444598233066497	0.47431125255501144	0.6143734972999476
A9UF02_HUMAN	29221	Bipolar I disorder	1304	2	0.19609601007077276	0.1908470487648127	0.3554746809774403
A9UF02_HUMAN	29221	Bipolar disorder	5690	7	6.4674047471533e-05	0.00013681680133747812	0.2850427804353678
A9UF02_HUMAN	29221	Bladder disorder	4327	13	0.24309982675704433	0.22589526632263246	0.6973533206101246
A9UF02_HUMAN	29221	Bladder pain	1203	3	0.5042467011929499	0.39604296331089334	0.578535043290784
A9UF02_HUMAN	29221	Blepharitis	1130	3	0.6441029161375746	0.47410881087599693	0.6160089192093531
A9UF02_HUMAN	29221	Blepharospasm	1840	2	0.030193424316269854	0.03914333846291075	0.251810682607523
A9UF02_HUMAN	29221	Blindness transient	2945	10	0.5718582653369331	0.4334530272539199	0.7884634320828402
A9UF02_HUMAN	29221	Blindness unilateral	5855	24	0.920331448045041	0.6236709614552449	0.9524843792816887
A9UF02_HUMAN	29221	Blood bicarbonate decreased	1208	1	0.07321537421001754	0.08447893119745066	0.19172660920987042
A9UF02_HUMAN	29221	Blood calcium abnormal	552	1	0.7372219279772727	0.5235487561844626	0.4199891421348705
A9UF02_HUMAN	29221	Blood calcium increased	4248	16	0.7241306641991818	0.5190346280340612	0.8749112185871971
A9UF02_HUMAN	29221	Blood cholesterol increased	22099	24	5.120341560717346e-18	2.5907370258575383e-17	0.2515939486111677
A9UF02_HUMAN	29221	Blood creatine phosphokinase MB increased	1062	3	0.638947449585588	0.47133753685741536	0.6555637884314833
A9UF02_HUMAN	29221	Blood creatinine abnormal	1019	4	1.0	0.6330520235558572	0.911976422921433
A9UF02_HUMAN	29221	Blood electrolytes abnormal	665	2	1.0	0.6330520235558572	0.6980815002000411
A9UF02_HUMAN	29221	Blood glucose abnormal	6127	6	3.4964146641255734e-06	8.54648330105532e-06	0.22683942229993165
A9UF02_HUMAN	29221	Blood glucose decreased	23515	29	3.7126793059129187e-17	1.8141604867153153e-16	0.2857449758227495
A9UF02_HUMAN	29221	Blood glucose fluctuation	5331	3	5.192272700663955e-07	1.376439645683569e-06	0.13030068542585224
A9UF02_HUMAN	29221	Blood glucose increased	86545	119	1.9460545941000524e-53	2.2999487025114572e-52	0.3186340691532793
A9UF02_HUMAN	29221	Blood lactic acid increased	1817	2	0.029857495565277666	0.03877273962230311	0.25500167197389934
A9UF02_HUMAN	29221	Blood pH decreased	1416	3	0.30454574349512353	0.26897939794679115	0.49132487752932824
A9UF02_HUMAN	29221	Blood pH increased	511	2	1.0	0.6330520235558572	0.9092888696122342
A9UF02_HUMAN	29221	Blood parathyroid hormone increased	1271	5	1.0	0.6330520235558572	0.9139574143614282
A9UF02_HUMAN	29221	Blood pressure abnormal	5282	19	0.526903835832759	0.4096732857746753	0.8354296654018541
A9UF02_HUMAN	29221	Blood pressure decreased	27640	84	0.0008976120503014638	0.0016053231479789196	0.7054281265267217
A9UF02_HUMAN	29221	Blood pressure diastolic increased	1165	2	0.2572539923668576	0.23629565756263066	0.39796047689821773
A9UF02_HUMAN	29221	Blood pressure fluctuation	6201	10	0.0004226081900156757	0.0007966401347801573	0.3737910148866316
A9UF02_HUMAN	29221	Blood pressure immeasurable	1071	2	0.3437948294229023	0.29580188334988766	0.43295419516616207
A9UF02_HUMAN	29221	Blood pressure inadequately controlled	4106	6	0.0026124755176078524	0.004309947534811832	0.3386546594872882
A9UF02_HUMAN	29221	Blood pressure increased	56300	90	2.5489081145683517e-29	1.8553619363948125e-28	0.3705259127996482
A9UF02_HUMAN	29221	Blood pressure systolic decreased	1821	5	0.46899586512756986	0.37469273464779435	0.6371531313775155
A9UF02_HUMAN	29221	Blood pressure systolic increased	5863	25	1.0	0.6330520235558572	0.9909815746673245
A9UF02_HUMAN	29221	Blood prolactin increased	2096	3	0.0428714319328818	0.05313760927730353	0.3316971103434978
A9UF02_HUMAN	29221	Blood testosterone decreased	4421	5	0.0003078756021230411	0.0005930118850669052	0.2620176826498116
A9UF02_HUMAN	29221	Blood thyroid stimulating hormone abnormal	559	1	0.7385216856687435	0.5241342062879074	0.414720461140347
A9UF02_HUMAN	29221	Blood triglycerides increased	10079	14	3.878844945694598e-07	1.0402213243453934e-06	0.3218873564260696
A9UF02_HUMAN	29221	Blood urine present	7984	34	1.0	0.6330520235558572	0.9896951683968128
A9UF02_HUMAN	29221	Bloody discharge	514	2	1.0	0.6330520235558572	0.9039610051418501
A9UF02_HUMAN	29221	Body height decreased	5053	4	7.613134746336492e-06	1.7951124347144047e-05	0.1833345354060714
A9UF02_HUMAN	29221	Body temperature decreased	3428	6	0.017900686541773778	0.02462698627557617	0.4057522220625019
A9UF02_HUMAN	29221	Body temperature fluctuation	588	2	1.0	0.6330520235558572	0.789808932820183
A9UF02_HUMAN	29221	Bone debridement	597	1	0.5298076098430626	0.4108079566431627	0.3882785525441504
A9UF02_HUMAN	29221	Bone density abnormal	567	1	0.7400991541447314	0.5248416451574739	0.40885868783800994
A9UF02_HUMAN	29221	Bone density decreased	6207	17	0.06424740917774126	0.07549622640139507	0.6355473819672587
A9UF02_HUMAN	29221	Bone disorder	10572	26	0.0022444824590974384	0.003748299330210537	0.5705257396381713
A9UF02_HUMAN	29221	Bone graft	660	2	1.0	0.6330520235558572	0.7033860708702542
A9UF02_HUMAN	29221	Bradycardia	21589	39	4.362768232434038e-10	1.4675924027293979e-09	0.4188003097603819
A9UF02_HUMAN	29221	Bradyphrenia	2507	3	0.01318779876656048	0.01873132489556363	0.277253215634561
A9UF02_HUMAN	29221	Brain death	1498	6	1.0	0.6330520235558572	0.9306193725857116
A9UF02_HUMAN	29221	Brain injury	3502	8	0.06962472089690594	0.08100079568086879	0.5298546475473696
A9UF02_HUMAN	29221	Brain operation	679	1	0.3818513354233561	0.32119401015860816	0.34131860961108207
A9UF02_HUMAN	29221	Brain stem infarction	648	1	0.5377497496543895	0.4142738973255436	0.3576723606125404
A9UF02_HUMAN	29221	Breakthrough pain	1423	3	0.3052257197790029	0.26944662381968765	0.4889028534851696
A9UF02_HUMAN	29221	Breast calcifications	642	2	1.0	0.6330520235558572	0.7231688041134801
A9UF02_HUMAN	29221	Breast cancer	29038	112	0.26124034754011644	0.23916325742300162	0.8960232987425542
A9UF02_HUMAN	29221	Breast cancer female	15077	10	5.5500702643938056e-17	2.6924626869013336e-16	0.15358997631666133
A9UF02_HUMAN	29221	Breast cancer metastatic	4884	5	6.596860173643607e-05	0.0001393954183778558	0.23715312289025783
A9UF02_HUMAN	29221	Breast cyst	876	2	0.5993375034390244	0.44840398178633206	0.5295515270396193
A9UF02_HUMAN	29221	Breast discharge	948	4	1.0	0.6330520235558572	0.9805678699843797
A9UF02_HUMAN	29221	Breast discomfort	508	1	0.7309904158389495	0.5214796389752692	0.45643790397694994
A9UF02_HUMAN	29221	Breast disorder	980	4	1.0	0.6330520235558572	0.9484181037553837
A9UF02_HUMAN	29221	Breast enlargement	2022	4	0.12484080765554059	0.13227010553219992	0.45869973699963057
A9UF02_HUMAN	29221	Breast pain	4732	17	0.5770531856309299	0.4363895887197715	0.8343665523599854
A9UF02_HUMAN	29221	Breast tenderness	4496	4	5.27736990067951e-05	0.00011290230828482357	0.20606769128790173
A9UF02_HUMAN	29221	Breath odour	1212	4	0.8249453427933422	0.5692695834178041	0.7662715805175947
A9UF02_HUMAN	29221	Bronchial obstruction	582	2	1.0	0.6330520235558572	0.7979793700562539
A9UF02_HUMAN	29221	Bronchitis	31471	83	1.5542900511684398e-06	3.938653700964701e-06	0.611933332396267
A9UF02_HUMAN	29221	Bronchospasm	6567	13	0.002371780011897147	0.003942817234533368	0.45901468189076544
A9UF02_HUMAN	29221	Bundle branch block right	2699	7	0.23569912249694844	0.22050187065840213	0.601745215904233
A9UF02_HUMAN	29221	Burning sensation	28967	61	3.330569379967612e-10	1.1293649886240432e-09	0.4883503444369726
A9UF02_HUMAN	29221	Bursitis	4257	11	0.09932343196583938	0.10953660662169871	0.599518179575942
A9UF02_HUMAN	29221	Calcium deficiency	795	3	1.0	0.6330520235558572	0.8765682474102788
A9UF02_HUMAN	29221	Carcinoembryonic antigen increased	566	1	0.7398967511868273	0.5247506036531941	0.4095823315332985
A9UF02_HUMAN	29221	Cardiac ablation	534	2	1.0	0.6330520235558572	0.8699775087079459
A9UF02_HUMAN	29221	Cardiac arrest	40759	118	5.0283615140305965e-06	1.2088901236191244e-05	0.6719040880717749
A9UF02_HUMAN	29221	Cardiac disorder	43611	173	0.3039633309090026	0.2685934705059727	0.921649822637374
A9UF02_HUMAN	29221	Cardiac failure chronic	962	3	0.8046771691763555	0.558839616073782	0.7239228904577069
A9UF02_HUMAN	29221	Cardiac failure congestive	55736	235	0.7948654263704049	0.5535439861772781	0.9798434995645791
A9UF02_HUMAN	29221	Cardiac fibrillation	725	1	0.38620969555486373	0.323314752925698	0.31963262060264314
A9UF02_HUMAN	29221	Cardiac flutter	2515	6	0.1686511010188754	0.16880903780517836	0.5534013965316388
A9UF02_HUMAN	29221	Cardiac hypertrophy	579	2	1.0	0.6330520235558572	0.8021283095886087
A9UF02_HUMAN	29221	Cardiac murmur	5430	19	0.46618139667902314	0.3729986360513111	0.8125792513417036
A9UF02_HUMAN	29221	Cardiac operation	3140	7	0.07588416640768973	0.0870152553856458	0.5170437667456735
A9UF02_HUMAN	29221	Cardiac stress test abnormal	556	2	1.0	0.6330520235558572	0.8354296654018543
A9UF02_HUMAN	29221	Cardio-respiratory arrest	21867	64	0.0013038040266568638	0.0022697909734628098	0.6792871214165056
A9UF02_HUMAN	29221	Cardioactive drug level increased	1036	1	0.14553438822541903	0.14971193550975492	0.22358842252783928
A9UF02_HUMAN	29221	Cardiogenic shock	4750	19	0.9113680323720414	0.6182175383821418	0.9293735635193316
A9UF02_HUMAN	29221	Cardiovascular disorder	19544	29	5.344201946513389e-12	2.0208590612192753e-11	0.343889649099313
A9UF02_HUMAN	29221	Carotid artery disease	857	3	1.0	0.6330520235558572	0.8129298032189002
A9UF02_HUMAN	29221	Carotid artery occlusion	1869	4	0.2112106405939879	0.20186848457921377	0.49633033204571286
A9UF02_HUMAN	29221	Carotid artery stenosis	2363	8	0.6359279041373089	0.4695923246248905	0.7861198040469253
A9UF02_HUMAN	29221	Carpal tunnel syndrome	5448	6	4.265350023132037e-05	9.230219075725842e-05	0.2551422462142377
A9UF02_HUMAN	29221	Cartilage injury	1011	3	0.8070574382679665	0.5596688640688019	0.6887321943937905
A9UF02_HUMAN	29221	Cataract	19101	64	0.04596841348103685	0.056502777494403834	0.7779848247225967
A9UF02_HUMAN	29221	Catheter related complication	1331	4	0.6725281282271394	0.4902607695266123	0.6975554402903199
A9UF02_HUMAN	29221	Catheter related infection	1243	5	1.0	0.6330520235558572	0.9346285028930275
A9UF02_HUMAN	29221	Catheter site erythema	683	1	0.38198635147231547	0.3212677978856275	0.3393167409330112
A9UF02_HUMAN	29221	Catheter site infection	1734	3	0.13678774995643228	0.142722910316163	0.40106415479430435
A9UF02_HUMAN	29221	Catheter site pain	754	2	0.7776161649609001	0.5447110662643857	0.6154628120114723
A9UF02_HUMAN	29221	Cellulitis	19973	62	0.007915137993939074	0.011829792274387001	0.7205900795345007
A9UF02_HUMAN	29221	Central nervous system lesion	6484	12	0.0011626685908794879	0.002040319968610335	0.42907419774347394
A9UF02_HUMAN	29221	Cerebellar infarction	914	1	0.19944934577420786	0.19310176090655715	0.2534655173234541
A9UF02_HUMAN	29221	Cerebral atrophy	2480	9	0.7582354873606065	0.5346958675005008	0.8428677279833358
A9UF02_HUMAN	29221	Cerebral haematoma	1358	5	1.0	0.6330520235558572	0.8551885340588087
A9UF02_HUMAN	29221	Cerebral thrombosis	1464	2	0.10534301733433986	0.11463145244357315	0.31657184311397213
A9UF02_HUMAN	29221	Cerebral venous thrombosis	807	3	1.0	0.6330520235558572	0.8634851392399762
A9UF02_HUMAN	29221	Cerebrovascular accident	91721	270	2.633138630807211e-11	9.560371902555987e-11	0.6832269157844603
A9UF02_HUMAN	29221	Cerebrovascular disorder	2354	3	0.017294629908996013	0.023888316948878746	0.2952964916839391
A9UF02_HUMAN	29221	Cervical dysplasia	1158	4	1.0	0.6330520235558572	0.8021283095886087
A9UF02_HUMAN	29221	Cervical spinal stenosis	805	3	1.0	0.6330520235558572	0.8656384687642654
A9UF02_HUMAN	29221	Cervical vertebral fracture	1302	3	0.39265264791208854	0.3269575049826985	0.5344434580053432
A9UF02_HUMAN	29221	Cervicobrachial syndrome	601	2	1.0	0.6330520235558572	0.7726678374501289
A9UF02_HUMAN	29221	Change of bowel habit	1086	3	0.6400996178289298	0.47185243753362033	0.6410360590479601
A9UF02_HUMAN	29221	Chapped lips	1841	2	0.030212625712708063	0.039164999730044565	0.25167375455825297
A9UF02_HUMAN	29221	Chest discomfort	37547	98	8.677846440838002e-08	2.4605146908928367e-07	0.6055855616170989
A9UF02_HUMAN	29221	Chest pain	87901	284	4.1253455546391826e-07	1.103690881713516e-06	0.7501007900046003
A9UF02_HUMAN	29221	Chills	47592	167	0.007517987928879297	0.011292652801845328	0.814889633986808
A9UF02_HUMAN	29221	Choking	6723	11	0.000248175762894181	0.0004847665477726306	0.37925420001183696
A9UF02_HUMAN	29221	Choking sensation	2221	4	0.07318473608381804	0.08444877009988203	0.41752641825225734
A9UF02_HUMAN	29221	Cholecystectomy	7079	22	0.14484736689851585	0.1491677635925088	0.7214267225391666
A9UF02_HUMAN	29221	Cholecystitis acute	2894	12	1.0	0.6330520235558572	0.9635559360845813
A9UF02_HUMAN	29221	Cholecystitis chronic	6453	4	5.530208219618022e-08	1.5935870895959573e-07	0.14353482233916182
A9UF02_HUMAN	29221	Cholecystitis infective	1008	3	0.806858370568716	0.5595771341885235	0.6907881113919809
A9UF02_HUMAN	29221	Chondropathy	1392	2	0.14476806578208512	0.14910548541225674	0.33296980908822105
A9UF02_HUMAN	29221	Chromatopsia	586	2	1.0	0.6330520235558572	0.7925137579325809
A9UF02_HUMAN	29221	Chromaturia	10041	33	0.12678445696014073	0.13402305016862115	0.7630558124938397
A9UF02_HUMAN	29221	Chronic obstructive pulmonary disease	21985	64	0.0011192753897069571	0.0019704745640648385	0.6756305418659765
A9UF02_HUMAN	29221	Chronic sinusitis	1138	2	0.25537894108854936	0.23505960331035453	0.4074190445709747
A9UF02_HUMAN	29221	Circumstance or information capable of leading to medication error	5132	1	1.1855002578455318e-08	3.600829133117182e-08	0.04510115324816091
A9UF02_HUMAN	29221	Clavicle fracture	1478	5	0.8406979889755581	0.5776772551944311	0.7855194070479078
A9UF02_HUMAN	29221	Cleft lip and palate	686	1	0.3821192689353109	0.3213337336977181	0.3378306822135965
A9UF02_HUMAN	29221	Cleft palate	1117	1	0.10291358507700019	0.11260669016794483	0.2073602305701735
A9UF02_HUMAN	29221	Clonus	1154	1	0.07157494098237954	0.0829725761388584	0.20070599940703696
A9UF02_HUMAN	29221	Clostridial infection	7774	31	0.7943204353195688	0.5532229808420234	0.9264929015634409
A9UF02_HUMAN	29221	Clostridium colitis	965	3	0.804767372905565	0.558847284705158	0.7216653346662587
A9UF02_HUMAN	29221	Coagulopathy	8213	35	1.0	0.6330520235558572	0.9903999273747832
A9UF02_HUMAN	29221	Coarctation of the aorta	623	1	0.5330015467320757	0.41197910190092146	0.3720482593509865
A9UF02_HUMAN	29221	Coeliac disease	3910	4	0.0005088423969073745	0.0009479416481119972	0.23698312065162686
A9UF02_HUMAN	29221	Cognitive disorder	16735	36	3.6418307497658678e-06	8.885691655332209e-06	0.4988864377140721
A9UF02_HUMAN	29221	Cold sweat	7816	17	0.0023613492139230355	0.003926739300591945	0.5044285542219941
A9UF02_HUMAN	29221	Colitis	10610	42	0.6558404343969235	0.4813960051651184	0.9196999174191116
A9UF02_HUMAN	29221	Colitis ischaemic	3018	7	0.12282333861485578	0.13045609407146155	0.5379933979455979
A9UF02_HUMAN	29221	Colitis ulcerative	9321	16	2.4035446339962582e-05	5.359166245127261e-05	0.3979177084428821
A9UF02_HUMAN	29221	Colonic polyp	3881	11	0.17771564905214332	0.17625577603523337	0.6577659406923643
A9UF02_HUMAN	29221	Communication disorder	1690	3	0.13436614802267371	0.140706098954585	0.4115246306751279
A9UF02_HUMAN	29221	Compartment syndrome	1046	1	0.14685539426463476	0.1507461042803113	0.22144882039838626
A9UF02_HUMAN	29221	Completed suicide	40294	40	3.5238578360048632e-34	2.8900191441608247e-33	0.22995381061888373
A9UF02_HUMAN	29221	Complex partial seizures	1148	1	0.10598833803717257	0.11516825205755347	0.20175590001422286
A9UF02_HUMAN	29221	Complex regional pain syndrome	767	2	0.7786600055279447	0.545047138629712	0.6050039668400357
A9UF02_HUMAN	29221	Complications of transplanted kidney	1200	2	0.2615271841743916	0.2393782948549777	0.38633391872506445
A9UF02_HUMAN	29221	Compulsive shopping	527	2	1.0	0.6330520235558572	0.8815772088240519
A9UF02_HUMAN	29221	Concussion	2637	5	0.07100891380658633	0.08241216245872733	0.43961629429390886
A9UF02_HUMAN	29221	Condition aggravated	75043	144	4.0567925648528746e-29	2.937119713364804e-28	0.44491406418709406
A9UF02_HUMAN	29221	Conduction disorder	974	2	0.4558707703311835	0.36691656811024254	0.4761605294574354
A9UF02_HUMAN	29221	Confusional state	65926	160	1.1521620143677793e-15	5.271705203851196e-15	0.5629997684306508
A9UF02_HUMAN	29221	Congenital anomaly	5386	7	0.0001551534429103145	0.00031196974341524803	0.3011522813188688
A9UF02_HUMAN	29221	Connective tissue disorder	572	1	0.5285894262022536	0.4106926159713486	0.4052784891704267
A9UF02_HUMAN	29221	Constipation	68109	222	1.5008345027560338e-05	3.425833748452353e-05	0.7567562544260553
A9UF02_HUMAN	29221	Contraindication to medical treatment	775	1	0.27469381848044405	0.2487457796510525	0.29898451849652924
A9UF02_HUMAN	29221	Contrast media reaction	1167	2	0.2574430687089163	0.23641898976614356	0.3972772829464612
A9UF02_HUMAN	29221	Contusion	36286	106	2.351171717152359e-05	5.2481507341476645e-05	0.6779957389587961
A9UF02_HUMAN	29221	Convulsion	76740	148	1.372299245137925e-29	1.0062218797265436e-28	0.4471651682005225
A9UF02_HUMAN	29221	Coordination abnormal	8544	8	1.9690746840702077e-08	5.8796480431125185e-08	0.2168828653386257
A9UF02_HUMAN	29221	Cor pulmonale	638	1	0.5356642621066292	0.4132592992820519	0.3632873113285928
A9UF02_HUMAN	29221	Corneal abrasion	566	1	0.7398967511868273	0.5247506036531941	0.4095823315332985
A9UF02_HUMAN	29221	Corneal disorder	958	3	0.804568718903418	0.558839616073782	0.7269550282187862
A9UF02_HUMAN	29221	Corneal opacity	512	1	0.731406021558521	0.5215540777250853	0.45286500453290335
A9UF02_HUMAN	29221	Coronary arterial stent insertion	3605	6	0.010402616218905078	0.015129536853689984	0.38579719474795265
A9UF02_HUMAN	29221	Coronary artery bypass	4749	5	8.847221101538486e-05	0.00018403084615815652	0.24390178890842498
A9UF02_HUMAN	29221	Coronary artery disease	23294	61	3.0203391512969643e-05	6.657219763470472e-05	0.6075950181334795
A9UF02_HUMAN	29221	Coronary artery occlusion	8868	22	0.0071192683803773206	0.01074629531068966	0.5755266087450712
A9UF02_HUMAN	29221	Coronary artery restenosis	569	1	0.5285735337781924	0.4106853787577208	0.4074190445709747
A9UF02_HUMAN	29221	Coronary artery stenosis	3661	13	0.6120069660690832	0.45549835654390525	0.8246661801294071
A9UF02_HUMAN	29221	Coronary artery thrombosis	1436	3	0.3066708376589904	0.27041739352521893	0.484467586845039
A9UF02_HUMAN	29221	Cough	87425	356	0.31041295605060687	0.2729682620146483	0.9461850964707031
A9UF02_HUMAN	29221	Crohn's disease	19179	21	1.2415560616068043e-15	5.671945913382218e-15	0.2536639713771054
A9UF02_HUMAN	29221	Crying	18791	9	5.936863684533873e-24	3.699620461557305e-23	0.11088947693785658
A9UF02_HUMAN	29221	Culture positive	734	1	0.3877454231111839	0.3242041486895062	0.31570807273712637
A9UF02_HUMAN	29221	Culture urine positive	1135	1	0.1045508382816703	0.11398390823999589	0.2040687983389009
A9UF02_HUMAN	29221	Cushing's syndrome	1424	2	0.10385339480307766	0.11342554134236434	0.32547681760381664
A9UF02_HUMAN	29221	Cutaneous lupus erythematosus	1423	1	0.038188306589537264	0.048071586014044564	0.16273840880190832
A9UF02_HUMAN	29221	Cyanosis	8112	24	0.07367309915486883	0.0849054089372579	0.6866884786834232
A9UF02_HUMAN	29221	Cystitis	12614	33	0.002648770859722903	0.004365063658692924	0.6069996479960534
A9UF02_HUMAN	29221	Cystitis interstitial	696	1	0.38275513683182466	0.3214915082262902	0.33296980908822105
A9UF02_HUMAN	29221	Cytomegalovirus chorioretinitis	509	1	0.7310912594745728	0.5214991104831864	0.4555394041659717
A9UF02_HUMAN	29221	Cytomegalovirus infection	5214	22	1.0	0.6330520235558572	0.9805678699843797
A9UF02_HUMAN	29221	Dark circles under eyes	556	2	1.0	0.6330520235558572	0.8354296654018543
A9UF02_HUMAN	29221	Debridement	1089	1	0.1011993637285945	0.11115307187461586	0.21269670709220004
A9UF02_HUMAN	29221	Decreased activity	3284	10	0.3482811724583726	0.2986164553217471	0.7068235104346781
A9UF02_HUMAN	29221	Decreased interest	2512	2	0.0031752951189238402	0.005154470401923813	0.18439363929586744
A9UF02_HUMAN	29221	Decubitus ulcer	3688	8	0.043595325757631254	0.05391192449158889	0.5030739506876383
A9UF02_HUMAN	29221	Deep vein thrombosis	38143	70	1.5491454631630505e-16	7.373369258884328e-16	0.4254716258803339
A9UF02_HUMAN	29221	Defaecation urgency	1590	3	0.1770896832703107	0.17576684514715132	0.4374556092935985
A9UF02_HUMAN	29221	Deformity	4753	8	0.003607707521283923	0.005791857061914192	0.390160619289886
A9UF02_HUMAN	29221	Delirium	12760	26	2.4151013463776412e-05	5.382909610131613e-05	0.47249603033015186
A9UF02_HUMAN	29221	Delusion	5926	6	9.299057827968048e-06	2.1718914396502477e-05	0.23454123376653407
A9UF02_HUMAN	29221	Dental care	734	3	1.0	0.6330520235558572	0.9497155293419163
A9UF02_HUMAN	29221	Dental caries	5283	18	0.3986059263759463	0.3305449704482079	0.7911590335600465
A9UF02_HUMAN	29221	Dependence	3937	2	1.3744672364669755e-05	3.1515352434968e-05	0.11761830613281506
A9UF02_HUMAN	29221	Depressed mood	18183	30	6.804985960680827e-10	2.2598327319644187e-09	0.3824392948542615
A9UF02_HUMAN	29221	Depression	107205	266	2.991695078322807e-23	1.8226065426897558e-22	0.5756190782234677
A9UF02_HUMAN	29221	Depression suicidal	1318	2	0.14060865333158795	0.1460195693260002	0.3516930354351271
A9UF02_HUMAN	29221	Dermatitis acneiform	2078	5	0.23822525960130791	0.22231447915649002	0.5581621257026378
A9UF02_HUMAN	29221	Dermatitis contact	4074	2	1.0383440781896695e-05	2.4123493784023367e-05	0.11366110870152928
A9UF02_HUMAN	29221	Dermatomyositis	793	3	1.0	0.6330520235558572	0.8787874075303048
A9UF02_HUMAN	29221	Developmental delay	1890	2	0.02160332178952685	0.029110001578055874	0.24514196749609493
A9UF02_HUMAN	29221	Device breakage	6514	1	3.4988917317144254e-11	1.2612625438606712e-10	0.03553109432155898
A9UF02_HUMAN	29221	Device dislocation	16242	1	5.346407091499399e-29	3.859032864466382e-28	0.014248754221803684
A9UF02_HUMAN	29221	Device failure	6439	2	7.664511311759732e-10	2.5363694688901303e-09	0.07190120158965779
A9UF02_HUMAN	29221	Device malfunction	14323	3	1.2199194587601718e-22	7.285691262207794e-22	0.0484805902198981
A9UF02_HUMAN	29221	Device occlusion	1935	6	0.5989522938438585	0.44822026325004916	0.7197947661471652
A9UF02_HUMAN	29221	Device related infection	6752	16	0.01174611887024034	0.016883567019516807	0.5496770007513387
A9UF02_HUMAN	29221	Diabetes insipidus	884	2	0.6004394112263025	0.4489394251711575	0.5247483385857452
A9UF02_HUMAN	29221	Diabetes mellitus	37330	157	0.8119581639556566	0.5622162587427162	0.9773760718441136
A9UF02_HUMAN	29221	Diabetes mellitus inadequate control	7146	17	0.010930241925987861	0.015822774190513818	0.5518359229032588
A9UF02_HUMAN	29221	Diabetic coma	2029	6	0.49405031978917874	0.39014381161455297	0.686349038011805
A9UF02_HUMAN	29221	Diabetic foot	953	2	0.45353892595078005	0.365675617508413	0.4866751152814167
A9UF02_HUMAN	29221	Diabetic ketoacidosis	6776	3	2.183706998409703e-09	7.00937880932337e-09	0.10250141029808665
A9UF02_HUMAN	29221	Diabetic neuropathy	2905	2	0.0005753940067136328	0.0010620313724398155	0.15943094544699526
A9UF02_HUMAN	29221	Diplopia	10786	32	0.03243553093008696	0.041644129848962944	0.6886041058324378
A9UF02_HUMAN	29221	Disability	4156	3	4.081786806352129e-05	8.85313391805842e-05	0.16716639825401897
A9UF02_HUMAN	29221	Discomfort	14904	59	0.5726938944948451	0.4338943543256218	0.919732369259852
A9UF02_HUMAN	29221	Disorientation	19915	40	5.058595044785074e-08	1.4626093387439297e-07	0.4657389027749708
A9UF02_HUMAN	29221	Disseminated tuberculosis	1123	4	1.0	0.6330520235558572	0.827217220076188
A9UF02_HUMAN	29221	Disturbance in attention	22736	29	5.204560523453256e-16	2.4200404434321402e-15	0.29554791483564957
A9UF02_HUMAN	29221	Diverticulum intestinal haemorrhagic	683	1	0.38198635147231547	0.3212677978856275	0.3393167409330112
A9UF02_HUMAN	29221	Dizziness	194627	384	1.3956663491910849e-70	2.0948643266179712e-69	0.45748357804123924
A9UF02_HUMAN	29221	Dizziness postural	2808	5	0.04147723946946431	0.051671043082297606	0.4127970340997389
A9UF02_HUMAN	29221	Drooling	2480	3	0.012920026389546153	0.018398864436126396	0.2802753540367141
A9UF02_HUMAN	29221	Drug abuse	24192	4	4.327908572465557e-39	3.951934032035296e-38	0.03826922727241833
A9UF02_HUMAN	29221	Drug abuser	6070	2	3.101894353539611e-09	9.844503479371962e-09	0.07627357195659645
A9UF02_HUMAN	29221	Drug administered at inappropriate site	8357	1	1.688716112295726e-14	7.306846113839045e-14	0.02769435343661006
A9UF02_HUMAN	29221	Drug administration error	24747	4	5.196169639509663e-40	4.8343841861767184e-39	0.03741082606253302
A9UF02_HUMAN	29221	Drug dependence	15364	6	4.802649622051468e-21	2.719301290837921e-20	0.09040787237256685
A9UF02_HUMAN	29221	Drug dispensing error	11084	6	7.099821385889473e-14	2.9781119668111006e-13	0.1253370738308252
A9UF02_HUMAN	29221	Drug dose omission	91815	28	4.291459589787964e-130	1.1237691867106786e-128	0.07059379307371176
A9UF02_HUMAN	29221	Drug effect decreased	51198	27	3.2088018908186806e-61	4.2536690483625563e-60	0.12210389610405245
A9UF02_HUMAN	29221	Drug effect increased	2474	1	0.0005548575819403481	0.0010270178982011806	0.09357623021282395
A9UF02_HUMAN	29221	Drug hypersensitivity	47950	57	6.906170882259419e-35	5.757814463171941e-34	0.2754180984074891
A9UF02_HUMAN	29221	Drug ineffective	376367	772	1.100674619505766e-127	2.8300502002625557e-126	0.47564962624154766
A9UF02_HUMAN	29221	Drug ineffective for unapproved indication	9609	2	2.0049935468434512e-15	9.075680466276935e-15	0.04817612518295277
A9UF02_HUMAN	29221	Drug level above therapeutic	1228	1	0.0745699834093713	0.08576285419435438	0.18860148110539007
A9UF02_HUMAN	29221	Drug level below therapeutic	1172	5	1.0	0.6330520235558572	0.9914910767622692
A9UF02_HUMAN	29221	Drug prescribing error	12833	4	7.970260262513377e-19	4.163672728178711e-18	0.07215340784669534
A9UF02_HUMAN	29221	Drug rash with eosinophilia and systemic symptoms	3547	12	0.5191970556611858	0.4049218789927302	0.7855638494471749
A9UF02_HUMAN	29221	Drug screen negative	644	1	0.5368866664490854	0.4138326406736386	0.3598973830735826
A9UF02_HUMAN	29221	Drug screen positive	4714	1	7.471374551611306e-08	2.1296720018283808e-07	0.04910121309491059
A9UF02_HUMAN	29221	Drug specific antibody present	1981	1	0.003163868554302832	0.005138283017365678	0.11687576632137053
A9UF02_HUMAN	29221	Drug tolerance	1692	7	1.0	0.6330520235558572	0.9613638701567924
A9UF02_HUMAN	29221	Drug withdrawal syndrome	33832	11	9.965698678081179e-48	1.0723576835022228e-46	0.07526549157267524
A9UF02_HUMAN	29221	Dry eye	10169	43	1.0	0.6330520235558572	0.9826982761802769
A9UF02_HUMAN	29221	Dry mouth	31743	54	1.1537776794887921e-15	5.278835579285039e-15	0.3943436818795461
A9UF02_HUMAN	29221	Dry throat	3772	6	0.008225738793404404	0.012246967931374171	0.36868935313273543
A9UF02_HUMAN	29221	Duodenal ulcer haemorrhage	1322	2	0.14065735972799465	0.14605488892821897	0.35062729896411154
A9UF02_HUMAN	29221	Duodenal ulcer perforation	736	3	1.0	0.6330520235558572	0.947124218211379
A9UF02_HUMAN	29221	Dysarthria	17218	46	0.0005686888219787669	0.0010505569050549858	0.6199071043879819
A9UF02_HUMAN	29221	Dysgeusia	33438	101	0.00018920075180959948	0.0003758991275667748	0.7011073506598576
A9UF02_HUMAN	29221	Dysgraphia	2700	6	0.10518883373600502	0.11450423460017917	0.5153987022635047
A9UF02_HUMAN	29221	Dyskinesia	17986	22	1.6378755658019204e-13	6.739548677542514e-13	0.28340616683137937
A9UF02_HUMAN	29221	Dyslipidaemia	2294	9	1.0	0.6330520235558572	0.9114775299110821
A9UF02_HUMAN	29221	Dysmenorrhoea	5147	1	1.2140526769551709e-08	3.684796284013849e-08	0.04496968855738702
A9UF02_HUMAN	29221	Dyspepsia	38576	133	0.00892558844715586	0.013193208381467873	0.8006155685838698
A9UF02_HUMAN	29221	Dysphagia	36293	126	0.014119283525029	0.019898818578071215	0.8062091459577935
A9UF02_HUMAN	29221	Dysphonia	20681	58	0.0006395772275080429	0.0011725159813101974	0.6508273774109581
A9UF02_HUMAN	29221	Dyspnoea at rest	521	1	0.732457713508739	0.521778831127608	0.4450269563775262
A9UF02_HUMAN	29221	Dysstasia	11908	31	0.0031599768081590762	0.005132669775685391	0.604010653936661
A9UF02_HUMAN	29221	Dystonia	12009	1	3.592587352363912e-21	2.0433179784986392e-20	0.019271653673910195
A9UF02_HUMAN	29221	Dysuria	15924	60	0.33189703657620995	0.2880279312970574	0.875242122981519
A9UF02_HUMAN	29221	Ear congestion	1024	2	0.340450902692547	0.29392224575589193	0.45286500453290335
A9UF02_HUMAN	29221	Ear discomfort	3627	12	0.44517221843084104	0.36089315876800887	0.7681793105935721
A9UF02_HUMAN	29221	Ear haemorrhage	730	3	1.0	0.6330520235558572	0.9549409242763973
A9UF02_HUMAN	29221	Ear infection	7731	19	0.011301814191156721	0.016312030986869463	0.5701330820811669
A9UF02_HUMAN	29221	Ear pain	7276	11	4.85133660829357e-05	0.00010428637783674667	0.3503859863013696
A9UF02_HUMAN	29221	Economic problem	9202	4	1.3604099293654673e-12	5.326638737361323e-12	0.10063666767397854
A9UF02_HUMAN	29221	Ectopic pregnancy	1734	4	0.26828836739200107	0.2441952413220581	0.5350613117140199
A9UF02_HUMAN	29221	Ejaculation failure	1281	1	0.051373550267542506	0.06228884471664112	0.18079220102837001
A9UF02_HUMAN	29221	Electrocardiogram QRS complex prolonged	1623	1	0.01280370552782836	0.018258506340933497	0.14267202054026734
A9UF02_HUMAN	29221	Electrocardiogram ST segment abnormal	624	1	0.5331610760902672	0.4120392618272571	0.3714510711337297
A9UF02_HUMAN	29221	Electrocardiogram ST-T change	662	1	0.5410631182795491	0.41576562483652174	0.3500968491926076
A9UF02_HUMAN	29221	Electrocardiogram T wave inversion	1470	4	0.5448975670990126	0.41769985968969503	0.6314161454742527
A9UF02_HUMAN	29221	Electrocardiogram change	667	1	0.542352908223062	0.41640392962720274	0.34746849446893935
A9UF02_HUMAN	29221	Electroencephalogram abnormal	2249	8	0.7463957253262173	0.5281921134668751	0.8261098342394061
A9UF02_HUMAN	29221	Electromechanical dissociation	2086	5	0.23856868494404992	0.22255219918516506	0.5560163799046459
A9UF02_HUMAN	29221	Embolic stroke	1594	3	0.1772569482942742	0.17589445713472338	0.43635578375169126
A9UF02_HUMAN	29221	Embolism	4832	10	0.014869621967315842	0.020860767809864192	0.4799129351230062
A9UF02_HUMAN	29221	Embolism venous	914	3	1.0	0.6330520235558572	0.7620659187145344
A9UF02_HUMAN	29221	Emotional disorder	13598	10	1.0348412156527829e-14	4.5247989137033797e-14	0.17030763711827615
A9UF02_HUMAN	29221	Emotional distress	27112	12	4.3309464005796404e-35	3.6268150504457505e-34	0.10247115157917946
A9UF02_HUMAN	29221	Emphysema	4991	20	0.9135345480352736	0.619500218168959	0.9310561951973995
A9UF02_HUMAN	29221	Encephalopathy	9290	32	0.23348945162684254	0.21887277695215424	0.7998756269304425
A9UF02_HUMAN	29221	Endodontic procedure	1252	2	0.19093912226334392	0.18683156549006036	0.3702624277061018
A9UF02_HUMAN	29221	Endometriosis	1980	3	0.0570346797410649	0.06807151012203036	0.3511593585983515
A9UF02_HUMAN	29221	Endophthalmitis	1796	4	0.2733145577172392	0.24779404750655465	0.5165491457953428
A9UF02_HUMAN	29221	Enterocolitis	1537	6	1.0	0.6330520235558572	0.9069131965368267
A9UF02_HUMAN	29221	Enterocolitis infectious	771	3	1.0	0.6330520235558572	0.9039610051418501
A9UF02_HUMAN	29221	Enuresis	1631	2	0.0561591057035908	0.06719833965214356	0.28411788498012724
A9UF02_HUMAN	29221	Epilepsy	10719	22	0.00011432151595618726	0.00023416116517418795	0.4759379621350752
A9UF02_HUMAN	29221	Epistaxis	27847	78	5.270221998753759e-05	0.00011276342874080473	0.6500159656693602
A9UF02_HUMAN	29221	Epstein-Barr virus associated lymphoproliferative disorder	1297	4	0.6710768687821129	0.4896657822119519	0.7158979654023623
A9UF02_HUMAN	29221	Erectile dysfunction	11683	14	2.8725378660896864e-09	9.140229272234e-09	0.2776412925210721
A9UF02_HUMAN	29221	Erection increased	2632	1	0.0002687511299848033	0.0005222769264889782	0.08795667704914999
A9UF02_HUMAN	29221	Eructation	6434	14	0.007242300244821353	0.010915900273484581	0.5046411592567587
A9UF02_HUMAN	29221	Erysipelas	1757	6	0.7156682225864687	0.5144163315754154	0.792966364304901
A9UF02_HUMAN	29221	Erythema	61594	180	2.9652459767301243e-08	8.730061541667713e-08	0.6782577770042084
A9UF02_HUMAN	29221	Erythema multiforme	4365	15	0.48586466569919917	0.3851895994431936	0.7979793700562539
A9UF02_HUMAN	29221	Erythema of eyelid	1906	3	0.07682020281517267	0.08786913688220711	0.3648145307141045
A9UF02_HUMAN	29221	Escherichia urinary tract infection	1782	6	0.7161833862304615	0.5146241631736657	0.7818041125551135
A9UF02_HUMAN	29221	Euphoric mood	4863	3	2.770699686745342e-06	6.842148861296637e-06	0.14284815883723062
A9UF02_HUMAN	29221	Excoriation	3344	8	0.11029057884776247	0.11904054805059275	0.5549496818137017
A9UF02_HUMAN	29221	Exostosis	4237	6	0.002012090048718468	0.0033910106148872	0.3281692516894072
A9UF02_HUMAN	29221	Expired drug administered	5075	3	1.4612337056587107e-06	3.7130629233387026e-06	0.13687737617289844
A9UF02_HUMAN	29221	Extradural haematoma	669	2	1.0	0.6330520235558572	0.6938951043967425
A9UF02_HUMAN	29221	Extrapyramidal disorder	18110	2	6.74290588212306e-31	5.1164597218787884e-30	0.025559312714415024
A9UF02_HUMAN	29221	Extrasystoles	3564	9	0.12259471328349644	0.13024642193111202	0.58585827168687
A9UF02_HUMAN	29221	Eye disorder	11497	48	0.9430628178745187	0.6330520235558572	0.9702046319489085
A9UF02_HUMAN	29221	Eye injury	927	2	0.45186582819207044	0.3650178208845513	0.5003546320352728
A9UF02_HUMAN	29221	Eye irritation	14153	31	3.566533395301553e-05	7.792451038987539e-05	0.5079899827790484
A9UF02_HUMAN	29221	Eye movement disorder	3060	4	0.007788214789407497	0.011659055200745349	0.30289792842449426
A9UF02_HUMAN	29221	Eye pain	16354	59	0.18796742973076233	0.18461698378243369	0.8378905812618903
A9UF02_HUMAN	29221	Eye pruritus	7429	24	0.1823919878552686	0.18004394572547808	0.7500251742864992
A9UF02_HUMAN	29221	Eye rolling	785	1	0.2749907183072968	0.24892487806018795	0.29517094045448167
A9UF02_HUMAN	29221	Eyelid irritation	546	2	1.0	0.6330520235558572	0.8507868283688002
A9UF02_HUMAN	29221	Eyelid ptosis	3931	16	1.0	0.6330520235558572	0.9457533274740787
A9UF02_HUMAN	29221	Face injury	1595	2	0.07958538750655526	0.09050855377272718	0.29053862814351994
A9UF02_HUMAN	29221	Facial bones fracture	1780	2	0.04257324275795609	0.0528247214620326	0.2603082309519838
A9UF02_HUMAN	29221	Facial pain	3567	9	0.1226702819958078	0.1303160545895485	0.5853642933802199
A9UF02_HUMAN	29221	Facial paresis	1811	3	0.10226820703732968	0.11204189067560465	0.3839834358124673
A9UF02_HUMAN	29221	Faecal incontinence	5128	18	0.45442381489741346	0.3661179257555362	0.8151570081592261
A9UF02_HUMAN	29221	Faecaloma	1970	5	0.29961254336171417	0.26583361395265076	0.5888397387183553
A9UF02_HUMAN	29221	Faeces hard	1050	1	0.14742789283969523	0.15120577270469387	0.22060440163614264
A9UF02_HUMAN	29221	Faeces pale	963	1	0.14087463916540405	0.14621071669935276	0.2405551115554196
A9UF02_HUMAN	29221	Fall	124030	379	1.2169884444376712e-12	4.777088341392615e-12	0.7093020886437057
A9UF02_HUMAN	29221	Fanconi syndrome	566	1	0.7398967511868273	0.5247506036531941	0.4095823315332985
A9UF02_HUMAN	29221	Fanconi syndrome acquired	610	1	0.5311706397208897	0.4111991160131325	0.3799901762172638
A9UF02_HUMAN	29221	Fear	16870	8	1.0950180537491369e-21	6.3340251327117506e-21	0.10979196646486236
A9UF02_HUMAN	29221	Feeling abnormal	97802	164	9.745267304717283e-47	1.0303949220350422e-45	0.38870008439209563
A9UF02_HUMAN	29221	Feeling cold	11506	42	0.31792873463748217	0.2783186225535941	0.8478182769788182
A9UF02_HUMAN	29221	Feeling drunk	3615	3	0.00029464665104366724	0.000569245361737901	0.19220433331919737
A9UF02_HUMAN	29221	Feeling hot	26605	27	1.2101367712553308e-22	7.228118047385749e-22	0.23508836133420377
A9UF02_HUMAN	29221	Feeling jittery	9382	2	3.901955488638359e-15	1.742404662361223e-14	0.04934200795657007
A9UF02_HUMAN	29221	Feeling of body temperature change	2741	4	0.018234158858090228	0.02501718220972264	0.33820097525219384
A9UF02_HUMAN	29221	Feeling of despair	1768	2	0.04210549517047019	0.052335502322044085	0.26207702980329967
A9UF02_HUMAN	29221	Female genital tract fistula	532	1	0.7339531310985099	0.5222686321543066	0.4358079422152799
A9UF02_HUMAN	29221	Femoral neck fracture	2044	7	0.7334765279151921	0.5221269812864462	0.7952371729082941
A9UF02_HUMAN	29221	Femur fracture	17598	25	2.1711952296083385e-11	7.925589709326634e-11	0.32921814333965976
A9UF02_HUMAN	29221	Fibromyalgia	8227	14	6.748285476476219e-05	0.00014241760145711937	0.39447172073887626
A9UF02_HUMAN	29221	Fibula fracture	1346	3	0.39766203627466945	0.3299422675781549	0.5169337691354735
A9UF02_HUMAN	29221	Finger deformity	1477	4	0.5456692141824289	0.41813379469868256	0.6284155256383263
A9UF02_HUMAN	29221	Flat affect	1180	2	0.2588367737106194	0.2374203556115698	0.3928930684487498
A9UF02_HUMAN	29221	Flatulence	21703	92	0.9585462290753168	0.6330520235558572	0.9851505989126301
A9UF02_HUMAN	29221	Fluid overload	9356	34	0.3836541164387455	0.32189519546765905	0.8440331032776939
A9UF02_HUMAN	29221	Flushing	54320	31	8.879294529586436e-63	1.2029219245130324e-61	0.13214158552940233
A9UF02_HUMAN	29221	Foaming at mouth	1010	2	0.4617681237344257	0.37041474369323063	0.45915479626252703
A9UF02_HUMAN	29221	Focal segmental glomerulosclerosis	552	1	0.7372219279772727	0.5235487561844626	0.4199891421348705
A9UF02_HUMAN	29221	Foetal disorder	564	2	1.0	0.6330520235558572	0.8235374281719346
A9UF02_HUMAN	29221	Foetal distress syndrome	1087	1	0.10111636999208821	0.11108706172011124	0.21308841373509543
A9UF02_HUMAN	29221	Foetal growth retardation	896	3	1.0	0.6330520235558572	0.7774267099092282
A9UF02_HUMAN	29221	Folliculitis	1498	4	0.43077606646252226	0.3518406928439432	0.6195823756795545
A9UF02_HUMAN	29221	Food allergy	1706	1	0.009034822951894925	0.01333659120113115	0.13572669637320445
A9UF02_HUMAN	29221	Food aversion	549	2	1.0	0.6330520235558572	0.8461207214490444
A9UF02_HUMAN	29221	Food craving	1577	1	0.0185688395535587	0.025414415971167205	0.1468363054037523
A9UF02_HUMAN	29221	Foot deformity	3714	7	0.022726387890346776	0.030438652307166556	0.4369835773439966
A9UF02_HUMAN	29221	Foot fracture	7744	28	0.4331768557668597	0.3532579841221688	0.839760560505026
A9UF02_HUMAN	29221	Foot operation	1581	2	0.07863693804079355	0.08959879343864026	0.2931146514456157
A9UF02_HUMAN	29221	Foreign body sensation in eyes	1841	1	0.006492366407955083	0.009883821274623651	0.12576848767190957
A9UF02_HUMAN	29221	Foreign body trauma	810	2	0.594528822202202	0.4466579500349429	0.5728069735552318
A9UF02_HUMAN	29221	Fracture delayed union	610	2	1.0	0.6330520235558572	0.7612303201194528
A9UF02_HUMAN	29221	Frequent bowel movements	6324	23	0.5000867326599105	0.39387362598716685	0.8447107440525651
A9UF02_HUMAN	29221	Frustration	3738	6	0.008031700690953311	0.011985856315349135	0.3720482593509865
A9UF02_HUMAN	29221	Fungal skin infection	1244	4	0.8262481990726438	0.5698561599562001	0.7464968300526246
A9UF02_HUMAN	29221	Gait disturbance	78304	229	4.2556248441355803e-10	1.43267236819156e-09	0.6787551708669333
A9UF02_HUMAN	29221	Galactorrhoea	3656	4	0.00089853086792804	0.0016068983590761562	0.2534655173234541
A9UF02_HUMAN	29221	Gallbladder disorder	11418	24	0.00010350190102276536	0.00021330036327507453	0.48744395432609505
A9UF02_HUMAN	29221	Gallbladder non-functioning	573	1	0.5286011052949304	0.41069740443160807	0.40456996034320564
A9UF02_HUMAN	29221	Gallbladder operation	1814	2	0.029828623227690736	0.03874135033608163	0.2554238601725316
A9UF02_HUMAN	29221	Gastric bypass	1137	2	0.2553341173833945	0.23503392422781696	0.4077780040816099
A9UF02_HUMAN	29221	Gastric dilatation	609	2	1.0	0.6330520235558572	0.7624844063140482
A9UF02_HUMAN	29221	Gastric disorder	13927	40	0.007786746089061353	0.011657131965989786	0.6665630224420354
A9UF02_HUMAN	29221	Gastric infection	1105	4	1.0	0.6330520235558572	0.8407412073253901
A9UF02_HUMAN	29221	Gastric ulcer	8680	33	0.5649001173817604	0.42945467559671635	0.8831574617136981
A9UF02_HUMAN	29221	Gastric ulcer perforation	559	2	1.0	0.6330520235558572	0.8309300442237473
A9UF02_HUMAN	29221	Gastroenteritis viral	6158	19	0.1712761584551485	0.17094757585051581	0.7162186559716498
A9UF02_HUMAN	29221	Gastrointestinal inflammation	2143	7	0.6183780437908151	0.4591355226841359	0.7583792702313648
A9UF02_HUMAN	29221	Gastrointestinal injury	1163	2	0.257071752107698	0.2361646414477836	0.39864602466203897
A9UF02_HUMAN	29221	Gastrointestinal sounds abnormal	1881	8	1.0	0.6330520235558572	0.9884207893916225
A9UF02_HUMAN	29221	Gastrointestinal ulcer haemorrhage	568	2	1.0	0.6330520235558572	0.8177173756760199
A9UF02_HUMAN	29221	Gastrooesophageal reflux disease	32104	116	0.05988964013239008	0.07100087762667931	0.8391905092125915
A9UF02_HUMAN	29221	Gaze palsy	713	1	0.38449755173583333	0.3223464736769452	0.3250196872420135
A9UF02_HUMAN	29221	Genital haemorrhage	5849	5	2.9407505476433805e-06	7.240952370905573e-06	0.19799282795714718
A9UF02_HUMAN	29221	Genital pain	782	1	0.27487384475036525	0.24886369582040013	0.2963047596879816
A9UF02_HUMAN	29221	Genital rash	624	1	0.5331610760902672	0.4120392618272571	0.3714510711337297
A9UF02_HUMAN	29221	Gestational diabetes	1651	7	1.0	0.6330520235558572	0.9853394897896565
A9UF02_HUMAN	29221	Gingival disorder	1963	2	0.022494867857211012	0.030165350749631684	0.23601633586569465
A9UF02_HUMAN	29221	Gingival hyperplasia	633	1	0.5347132743741319	0.4127728029505192	0.36616141980429373
A9UF02_HUMAN	29221	Gingival infection	941	3	0.8042613857571732	0.558839616073782	0.740130119348551
A9UF02_HUMAN	29221	Gingival pain	3453	13	0.7938123521086391	0.552939013391332	0.874529716602348
A9UF02_HUMAN	29221	Gingival recession	852	1	0.28345466884876014	0.25437340512756934	0.2719318652365612
A9UF02_HUMAN	29221	Gingivitis	2465	6	0.21414097315446434	0.20403650754620611	0.5646539666115826
A9UF02_HUMAN	29221	Glossitis	1604	6	1.0	0.6330520235558572	0.8688886757809021
A9UF02_HUMAN	29221	Glossodynia	6926	21	0.11755528248288175	0.12569110812668374	0.7037935356470073
A9UF02_HUMAN	29221	Glucose tolerance impaired	2438	9	0.7578545507101447	0.5345256690264197	0.857441809735209
A9UF02_HUMAN	29221	Glycosuria	651	2	1.0	0.6330520235558572	0.713140269079549
A9UF02_HUMAN	29221	Glycosylated haemoglobin increased	7587	7	1.4579944795420517e-07	4.057326281371115e-07	0.21370687614963
A9UF02_HUMAN	29221	Graft complication	590	1	0.5292758511700951	0.4107693572211385	0.3928930684487498
A9UF02_HUMAN	29221	Grand mal convulsion	12447	16	3.814822798214083e-09	1.2025471243064589e-08	0.2978540967791021
A9UF02_HUMAN	29221	Granulocytopenia	3359	9	0.1851041009340929	0.182297286394826	0.6217093002527828
A9UF02_HUMAN	29221	Granuloma	1618	3	0.17864655488172534	0.17700638230148022	0.4298712395968674
A9UF02_HUMAN	29221	Grimacing	512	1	0.731406021558521	0.5215540777250853	0.45286500453290335
A9UF02_HUMAN	29221	Grip strength decreased	1906	3	0.07682020281517267	0.08786913688220711	0.3648145307141045
A9UF02_HUMAN	29221	Groin pain	3689	12	0.3794746921296218	0.31965182643945655	0.7552265998900634
A9UF02_HUMAN	29221	Guillain-Barre syndrome	1775	2	0.042369702826567976	0.05260816440245181	0.2610423207177819
A9UF02_HUMAN	29221	Gun shot wound	1381	4	0.5400448946013326	0.4153545682204339	0.6722266298222618
A9UF02_HUMAN	29221	Gynaecomastia	9081	18	0.0002801485290487728	0.0005429947725549663	0.4596107593174054
A9UF02_HUMAN	29221	HIV infection	1323	4	0.6720839325814567	0.490046213558791	0.7017862541813908
A9UF02_HUMAN	29221	Haemangioma of liver	633	2	1.0	0.6330520235558572	0.7334834146317389
A9UF02_HUMAN	29221	Haemarthrosis	1684	6	0.851299401277146	0.5835775487888403	0.8274637091167352
A9UF02_HUMAN	29221	Haemodialysis	7444	26	0.3291217010105267	0.28611946803437216	0.8111033230283303
A9UF02_HUMAN	29221	Haemoglobinuria	785	1	0.2749907183072968	0.24892487806018795	0.29517094045448167
A9UF02_HUMAN	29221	Haemolysis	3349	14	1.0	0.6330520235558572	0.9714531461554393
A9UF02_HUMAN	29221	Haemolytic anaemia	4277	18	1.0	0.6330520235558572	0.978035292719804
A9UF02_HUMAN	29221	Haemorrhage urinary tract	915	1	0.19955271293087076	0.19317416478872537	0.25318820275307835
A9UF02_HUMAN	29221	Haemorrhagic anaemia	3518	3	0.0004053821041522839	0.0007664897863446116	0.1975084073823445
A9UF02_HUMAN	29221	Hair disorder	1075	4	1.0	0.6330520235558572	0.8642913812000508
A9UF02_HUMAN	29221	Hallucination	26485	32	1.6361350083514162e-19	8.769665777017838e-19	0.27993983873746026
A9UF02_HUMAN	29221	Hallucination, auditory	6711	3	2.0631163834484426e-09	6.633453610999061e-09	0.10349464101802934
A9UF02_HUMAN	29221	Hallucination, visual	7700	8	3.228760992597949e-07	8.71580408013996e-07	0.24068020521717487
A9UF02_HUMAN	29221	Hand deformity	1439	3	0.3070375686354486	0.2706743768811925	0.4834554679310173
A9UF02_HUMAN	29221	Hangover	1526	2	0.07643183815525897	0.08751724312658499	0.3036929361106478
A9UF02_HUMAN	29221	Head discomfort	4455	13	0.20545136174070094	0.1975320129732219	0.6772584928212689
A9UF02_HUMAN	29221	Head injury	12380	35	0.010759448016961572	0.01559746936318343	0.656094824307086
A9UF02_HUMAN	29221	Head titubation	598	1	0.5298953021000684	0.4108091573441135	0.38762816970906805
A9UF02_HUMAN	29221	Headache	228199	538	9.688455261611506e-56	1.1854996479125214e-54	0.5468689908072825
A9UF02_HUMAN	29221	Hearing impaired	6441	24	0.5669124426734671	0.4307015660746822	0.8655035710755067
A9UF02_HUMAN	29221	Heart disease congenital	2198	6	0.32710878681570577	0.28475758256538963	0.6334325291504934
A9UF02_HUMAN	29221	Heart rate abnormal	1627	4	0.3414157114246899	0.29437113275814203	0.570336456725357
A9UF02_HUMAN	29221	Heart rate decreased	11996	32	0.005066887154051788	0.007896176411263726	0.6189609289637276
A9UF02_HUMAN	29221	Heart rate increased	40011	87	8.343112555719161e-13	3.3050258219280484e-12	0.5042836265534336
A9UF02_HUMAN	29221	Heart rate irregular	10465	32	0.05161543419986042	0.06252451482735846	0.7097909090503246
A9UF02_HUMAN	29221	Heart valve replacement	567	1	0.7400991541447314	0.5248416451574739	0.40885868783800994
A9UF02_HUMAN	29221	Heat stroke	548	1	0.7365142893941996	0.5232881604415031	0.4230603607245222
A9UF02_HUMAN	29221	Hemiparesis	8360	30	0.3575393904074612	0.3047811763168304	0.8334238318714775
A9UF02_HUMAN	29221	Heparin-induced thrombocytopenia	2740	4	0.01822440424353787	0.025006100251869764	0.33832458671975674
A9UF02_HUMAN	29221	Hepatic pain	1602	6	1.0	0.6330520235558572	0.8699775087079459
A9UF02_HUMAN	29221	Hepatitis C	6218	22	0.43675842028914336	0.3555589078089745	0.8216766270107971
A9UF02_HUMAN	29221	Hepatitis C virus test	817	1	0.27767428854048215	0.2503800720050672	0.2835956094562667
A9UF02_HUMAN	29221	Hepatitis cholestatic	2571	8	0.4499562950814826	0.36392856512342714	0.7223223326299294
A9UF02_HUMAN	29221	Hepatorenal syndrome	925	1	0.20069820002114822	0.19401125599740385	0.2504480706886511
A9UF02_HUMAN	29221	Hereditary angioedema	1400	3	0.30325447663103666	0.2681454395594806	0.4969520772719691
A9UF02_HUMAN	29221	Hernia repair	1141	3	0.645461426517561	0.4749184284124998	0.6100545271959058
A9UF02_HUMAN	29221	Herpes simplex	3165	6	0.0396980245624676	0.04975131809690892	0.4395327964222481
A9UF02_HUMAN	29221	Herpes virus infection	2401	8	0.6374744654428369	0.4705557817330126	0.7736364975054363
A9UF02_HUMAN	29221	Herpes zoster	19579	71	0.15507154550688731	0.15752979117384017	0.8422388368596609
A9UF02_HUMAN	29221	Herpes zoster ophthalmic	502	1	0.7304287797047322	0.5213964824519262	0.4619042261802667
A9UF02_HUMAN	29221	Hiatus hernia	6437	27	1.0	0.6330520235558572	0.9747548311295581
A9UF02_HUMAN	29221	Hidradenitis	528	2	1.0	0.6330520235558572	0.8799012065259073
A9UF02_HUMAN	29221	High density lipoprotein decreased	2106	1	0.002257995413355494	0.003768798589764321	0.10993540015026776
A9UF02_HUMAN	29221	Hip arthroplasty	4799	16	0.3759297180401469	0.31729744280950517	0.7741217388795772
A9UF02_HUMAN	29221	Hip fracture	12219	50	0.7820351781373409	0.5465474785329618	0.9508341577628138
A9UF02_HUMAN	29221	Histoplasmosis	720	1	0.3854490042235891	0.3228928566334904	0.3218553787431344
A9UF02_HUMAN	29221	Hodgkin's disease	1484	5	0.8409403961219455	0.5777961480543516	0.7823327157414254
A9UF02_HUMAN	29221	Homicidal ideation	2768	2	0.0011501414221660095	0.002020109497351287	0.16732756132777557
A9UF02_HUMAN	29221	Hordeolum	747	2	0.7771341929650288	0.5445926281171203	0.6212456840706406
A9UF02_HUMAN	29221	Hormone level abnormal	1668	4	0.34428811070092247	0.296103546396956	0.5562836954719078
A9UF02_HUMAN	29221	Hospice care	1195	2	0.26079355488914907	0.23883812585528993	0.38795308854369426
A9UF02_HUMAN	29221	Hospitalisation	29762	10	1.2638111007932112e-41	1.2135170482242226e-40	0.07778099533352838
A9UF02_HUMAN	29221	Hot flush	24430	29	2.7770648139405494e-18	1.4207174307668458e-17	0.2750299783686363
A9UF02_HUMAN	29221	Humerus fracture	2099	1	0.0022471990001440116	0.0037523785372465756	0.11030220081807132
A9UF02_HUMAN	29221	Hunger	4205	4	0.00013675896363223416	0.0002771966140897348	0.2203418398631884
A9UF02_HUMAN	29221	Hyperacusis	1506	1	0.02680236528071469	0.03520620499661349	0.1537634666553579
A9UF02_HUMAN	29221	Hyperaesthesia	3816	11	0.2146809281005687	0.20444933107076999	0.6690024153691063
A9UF02_HUMAN	29221	Hyperammonaemia	1860	7	0.8600932619901276	0.5885656649102824	0.8742029796083083
A9UF02_HUMAN	29221	Hyperammonaemic encephalopathy	505	2	1.0	0.6330520235558572	0.9201352577189409
A9UF02_HUMAN	29221	Hypercalcaemia	4656	18	0.7371055429577127	0.5235035104181517	0.8981139093776724
A9UF02_HUMAN	29221	Hyperchlorhydria	1455	5	0.8399136454555463	0.5773020388243016	0.7979793700562539
A9UF02_HUMAN	29221	Hypercholesterolaemia	4390	10	0.037198892207637085	0.04697200739094225	0.5283425052883872
A9UF02_HUMAN	29221	Hypercoagulation	1240	1	0.07557260407080892	0.08672901760014338	0.1867748323779771
A9UF02_HUMAN	29221	Hyperglycaemia	16074	47	0.006493920041211833	0.009886023180319394	0.6786334818660222
A9UF02_HUMAN	29221	Hyperhidrosis	54579	84	6.946845587444463e-30	5.133756488114606e-29	0.35670754114267994
A9UF02_HUMAN	29221	Hyperkalaemia	13712	38	0.004854902891744466	0.007592000411506288	0.6430987756340439
A9UF02_HUMAN	29221	Hyperlactacidaemia	664	1	0.5415724876908702	0.41601625195384845	0.34904075010002056
A9UF02_HUMAN	29221	Hyperlipidaemia	7980	25	0.12265131498691921	0.13029784617278886	0.7272596395861521
A9UF02_HUMAN	29221	Hyperparathyroidism	1074	3	0.6394284678086117	0.47150928064760267	0.6482185359000381
A9UF02_HUMAN	29221	Hyperphosphataemia	745	1	0.3899052412116697	0.3254782281316219	0.31104034585526025
A9UF02_HUMAN	29221	Hyperprolactinaemia	3685	1	3.6749101922913428e-06	8.962411476592389e-06	0.06281596561246298
A9UF02_HUMAN	29221	Hypersensitivity	60520	114	1.4659147137750025e-24	9.307564591704412e-24	0.43673141697943507
A9UF02_HUMAN	29221	Hypersomnia	10560	13	2.6242363163386075e-08	7.757966706836343e-08	0.28523582299346517
A9UF02_HUMAN	29221	Hypertension	83411	209	8.130841612191296e-18	4.0825583839304807e-17	0.5813024881506399
A9UF02_HUMAN	29221	Hypertensive crisis	4270	17	0.9065334697588997	0.6152995532598388	0.9250031258822787
A9UF02_HUMAN	29221	Hypertensive heart disease	1285	3	0.39149362259196785	0.32632718519943155	0.5415304617386434
A9UF02_HUMAN	29221	Hypertonia	3754	6	0.008112453961337161	0.012093850297516535	0.37046000637616905
A9UF02_HUMAN	29221	Hypertonic bladder	1029	4	1.0	0.6330520235558572	0.9030790919661019
A9UF02_HUMAN	29221	Hypertrichosis	554	2	1.0	0.6330520235558572	0.8384565844793972
A9UF02_HUMAN	29221	Hypertriglyceridaemia	2244	5	0.14710223815849088	0.15094629805039944	0.5167798510860062
A9UF02_HUMAN	29221	Hyperventilation	2879	2	0.0008401075924416148	0.0015092563605230173	0.16087175343504598
A9UF02_HUMAN	29221	Hypoacusis	7855	25	0.14199053980087936	0.14694718734562764	0.738869787089124
A9UF02_HUMAN	29221	Hypoaesthesia	62269	177	3.292666233452454e-09	1.0427562830742717e-08	0.659670828206331
A9UF02_HUMAN	29221	Hypoaesthesia facial	1643	3	0.18078488297811357	0.17874143901221995	0.42331832435911027
A9UF02_HUMAN	29221	Hypoaesthesia oral	6602	10	0.0001443198468971451	0.00029152503664931124	0.3510528175308156
A9UF02_HUMAN	29221	Hypocalcaemia	7093	26	0.46765743164239926	0.37387510379224176	0.8513887717877676
A9UF02_HUMAN	29221	Hypogeusia	831	2	0.595186501133502	0.44675550232311184	0.5582967848403224
A9UF02_HUMAN	29221	Hypoglycaemia	22404	78	0.06535978707747786	0.07663722782824929	0.8084875638570485
A9UF02_HUMAN	29221	Hypoglycaemic coma	1499	5	0.8416128163049609	0.5781582333232721	0.7744779695994432
A9UF02_HUMAN	29221	Hypoglycaemic unconsciousness	1278	2	0.19302854233387473	0.18840703795597702	0.3627178954801154
A9UF02_HUMAN	29221	Hypogonadism	575	1	0.5286339462288194	0.4107063011527146	0.40316030891343835
A9UF02_HUMAN	29221	Hypomagnesaemia	4457	18	0.9087274949647738	0.6166120263996098	0.9383762810753875
A9UF02_HUMAN	29221	Hypomania	1480	2	0.10639146661912613	0.11552421121542279	0.313144813689193
A9UF02_HUMAN	29221	Hyponatraemia	22684	86	0.26329563520177934	0.2406753626499174	0.8806799490752708
A9UF02_HUMAN	29221	Hypopnoea	1070	1	0.10062680704910326	0.11069931064014947	0.21647709758308104
A9UF02_HUMAN	29221	Hyposmia	665	2	1.0	0.6330520235558572	0.6980815002000411
A9UF02_HUMAN	29221	Hypospadias	1062	4	1.0	0.6330520235558572	0.8749112185871971
A9UF02_HUMAN	29221	Hypotension	75948	200	3.6246250829039e-14	1.5436583705023505e-13	0.6110102374090765
A9UF02_HUMAN	29221	Hypothermia	3982	4	0.00036384060300325734	0.0006933180903460172	0.2326938334000137
A9UF02_HUMAN	29221	Hypotonia	5031	6	0.00013951288482319564	0.0002823979730043491	0.27631524455679235
A9UF02_HUMAN	29221	Hypoventilation	1810	7	1.0	0.6330520235558572	0.8984459906900696
A9UF02_HUMAN	29221	Hysterectomy	3948	6	0.004675962182250625	0.007335565991100289	0.3522283368589248
A9UF02_HUMAN	29221	Iatrogenic injury	1162	3	0.5018830390342286	0.3949055662390471	0.5990009076349792
A9UF02_HUMAN	29221	Idiopathic pulmonary fibrosis	590	2	1.0	0.6330520235558572	0.7871225078786178
A9UF02_HUMAN	29221	Idiopathic thrombocytopenic purpura	1737	3	0.13702041740951218	0.14291781508324178	0.400370272173553
A9UF02_HUMAN	29221	Ileal stenosis	674	1	0.3817511240492327	0.32114410114152575	0.3438544090881332
A9UF02_HUMAN	29221	Ill-defined disorder	13216	8	1.2236488486652462e-15	5.59162500808754e-15	0.14016597051260668
A9UF02_HUMAN	29221	Immobile	1848	1	0.006533239945269	0.009939463602512903	0.12529183395577348
A9UF02_HUMAN	29221	Immune system disorder	4227	12	0.15857161558004415	0.16050055265095817	0.6588299425375476
A9UF02_HUMAN	29221	Immunosuppressant drug level increased	1020	2	0.3403685950807547	0.29388472445309766	0.4546444348061171
A9UF02_HUMAN	29221	Impaired driving ability	5770	7	4.778775373454859e-05	0.00010282185144748967	0.28108591379736164
A9UF02_HUMAN	29221	Impaired gastric emptying	2740	11	1.0	0.6330520235558572	0.9327791097396299
A9UF02_HUMAN	29221	Impaired self-care	997	1	0.1419282481479789	0.14690296710653386	0.23234339087983297
A9UF02_HUMAN	29221	Impaired work ability	10329	7	9.06352696925283e-12	3.382507939754008e-11	0.15693645816839713
A9UF02_HUMAN	29221	Impetigo	566	2	1.0	0.6330520235558572	0.8206170826819632
A9UF02_HUMAN	29221	Implant site infection	1200	2	0.2615271841743916	0.2393782948549777	0.38633391872506445
A9UF02_HUMAN	29221	Implantable defibrillator insertion	801	2	0.7822428145521805	0.5466594267300299	0.5792591171872681
A9UF02_HUMAN	29221	Inadequate analgesia	6253	1	1.0421893136734818e-10	3.6478711420365617e-10	0.03701439816319796
A9UF02_HUMAN	29221	Inappropriate schedule of drug administration	41688	11	1.8216106268981217e-61	2.423488140068856e-60	0.061078153189515795
A9UF02_HUMAN	29221	Incision site complication	712	1	0.3843725942020237	0.322275816943942	0.32547681760381664
A9UF02_HUMAN	29221	Incision site infection	878	2	0.5996031811035423	0.4485348425371932	0.5283425052883873
A9UF02_HUMAN	29221	Incoherent	3658	5	0.0033231211242902886	0.005372002581160129	0.31674516468151326
A9UF02_HUMAN	29221	Incontinence	4589	10	0.02352572400525548	0.03138352753067232	0.5053811253905081
A9UF02_HUMAN	29221	Incorrect dose administered	58553	41	2.3726521744722676e-61	3.1508100252674293e-60	0.16215433945120417
A9UF02_HUMAN	29221	Incorrect drug administration duration	19947	3	7.316653442170099e-33	5.822499720921187e-32	0.03480956939174392
A9UF02_HUMAN	29221	Incorrect product storage	8707	5	7.234458582949882e-11	2.5562741826582247e-10	0.13296599478069043
A9UF02_HUMAN	29221	Incorrect route of drug administration	29448	3	3.927065472573892e-50	4.398166923554047e-49	0.02357758709284907
A9UF02_HUMAN	29221	Incorrect storage of drug	1807	2	0.029774680073520403	0.0386830844317437	0.2564144236191841
A9UF02_HUMAN	29221	Increased appetite	6638	10	0.00010647213065390876	0.0002190034645219322	0.3491460731990248
A9UF02_HUMAN	29221	Increased tendency to bruise	3947	12	0.2722995810161271	0.24706407062236305	0.7057098367968904
A9UF02_HUMAN	29221	Increased upper airway secretion	3835	7	0.013264600292321314	0.01882764256649712	0.4231708780601346
A9UF02_HUMAN	29221	Infarction	3709	12	0.37958714918050107	0.31972395966125483	0.7511409812809747
A9UF02_HUMAN	29221	Inflammatory bowel disease	5945	9	0.0003144676704698454	0.0006049137886651139	0.35086357072891217
A9UF02_HUMAN	29221	Influenza	30418	85	2.3931430852963257e-05	5.33731225603746e-05	0.6484749768201845
A9UF02_HUMAN	29221	Influenza like illness	39739	47	4.0350764429462983e-29	2.9217310953831684e-28	0.2740214353992427
A9UF02_HUMAN	29221	Infrequent bowel movements	973	2	0.45574059954484103	0.36685577898082117	0.47665091105316915
A9UF02_HUMAN	29221	Infusion related reaction	18281	2	3.237135465042522e-31	2.475413832370119e-30	0.02532020540689465
A9UF02_HUMAN	29221	Infusion site erythema	1612	1	0.01936732815296826	0.026388245681954376	0.14364619324414254
A9UF02_HUMAN	29221	Infusion site pain	2614	1	0.0002670831861235418	0.0005192246483774527	0.0885625783835873
A9UF02_HUMAN	29221	Inguinal hernia	2373	9	0.8748783126672623	0.5968462061144899	0.8810178324225137
A9UF02_HUMAN	29221	Inhibitory drug interaction	762	1	0.3938297955741936	0.32762123229371154	0.30409200698595745
A9UF02_HUMAN	29221	Injection site erythema	60929	3	1.3024966069982691e-108	2.865637986208678e-107	0.011394840494188702
A9UF02_HUMAN	29221	Injection site extravasation	5452	1	2.7020666557677738e-09	8.614619495312223e-09	0.04245349794832391
A9UF02_HUMAN	29221	Injection site haematoma	42874	2	1.1425487384605795e-76	1.841801310622316e-75	0.010795578340936444
A9UF02_HUMAN	29221	Injection site haemorrhage	28483	1	8.607248156875737e-52	9.891802171156922e-51	0.008124921610712507
A9UF02_HUMAN	29221	Injection site necrosis	1066	1	0.10056820920173068	0.11065153798819452	0.21729015710451982
A9UF02_HUMAN	29221	Injection site pain	112066	6	8.786421027882343e-199	3.474622343958778e-197	0.012390541708887039
A9UF02_HUMAN	29221	Injection site reaction	30049	3	2.990647996735248e-51	3.4076924431658877e-50	0.023105972573685043
A9UF02_HUMAN	29221	Injection site swelling	30319	1	3.745395209652359e-55	4.5430235585112936e-54	0.007632891922828472
A9UF02_HUMAN	29221	Injury	49065	45	8.874918784708285e-44	8.891016570108105e-43	0.21243636840542868
A9UF02_HUMAN	29221	Insomnia	110134	171	1.6616306768788098e-58	2.1183246089855006e-57	0.35986465412083724
A9UF02_HUMAN	29221	Insulin resistance	676	2	1.0	0.6330520235558572	0.6866884786834232
A9UF02_HUMAN	29221	Intentional drug misuse	24159	2	4.786212367050216e-42	4.63423817953027e-41	0.0191591685487696
A9UF02_HUMAN	29221	Intentional overdose	18664	22	2.1002943866688457e-14	9.047682109119972e-14	0.2730988295761667
A9UF02_HUMAN	29221	Intentional self-injury	4675	2	8.809930230931081e-07	2.286061930686014e-06	0.099043020464932
A9UF02_HUMAN	29221	Internal injury	555	2	1.0	0.6330520235558572	0.8369403881240999
A9UF02_HUMAN	29221	International normalised ratio abnormal	2022	2	0.01586963114920808	0.02211537946107778	0.2291227894220927
A9UF02_HUMAN	29221	International normalised ratio decreased	3164	3	0.001488655908931014	0.002567182378261542	0.2196273495567671
A9UF02_HUMAN	29221	International normalised ratio increased	19768	38	1.6991996435464174e-08	5.1003633502612645e-08	0.4457036319320789
A9UF02_HUMAN	29221	Intervertebral disc degeneration	4815	13	0.09744848613785126	0.10780698438090454	0.6264852613727774
A9UF02_HUMAN	29221	Intervertebral disc disorder	2350	8	0.6355984970957702	0.4693921599436144	0.790483406716699
A9UF02_HUMAN	29221	Intervertebral disc operation	587	2	1.0	0.6330520235558572	0.7911590335600466
A9UF02_HUMAN	29221	Intervertebral discitis	612	2	1.0	0.6330520235558572	0.758734483004307
A9UF02_HUMAN	29221	Intestinal fistula	640	2	1.0	0.6330520235558572	0.7254357909602308
A9UF02_HUMAN	29221	Intestinal functional disorder	750	2	0.777333733847894	0.5446574298394395	0.618754056995491
A9UF02_HUMAN	29221	Intestinal haemorrhage	2355	10	1.0	0.6330520235558572	0.9868401591314014
A9UF02_HUMAN	29221	Intestinal ischaemia	2442	8	0.536515787136093	0.41366267685822317	0.7606048227323373
A9UF02_HUMAN	29221	Intestinal stenosis	1541	1	0.018154602717685285	0.02492564078884343	0.15026884241319066
A9UF02_HUMAN	29221	Intra-abdominal haematoma	708	1	0.38390048516329445	0.32201928407946073	0.32731827060298957
A9UF02_HUMAN	29221	Intracardiac thrombus	1999	5	0.3011527442189238	0.266871531762563	0.5802758709034945
A9UF02_HUMAN	29221	Intracranial aneurysm	1857	3	0.0758867147062571	0.08701748848099178	0.3744563386995366
A9UF02_HUMAN	29221	Intracranial venous sinus thrombosis	1002	1	0.14225004928517695	0.14714545419192385	0.2311828344818318
A9UF02_HUMAN	29221	Intramedullary rod insertion	2057	1	0.003361961451259406	0.005429422117034524	0.11255545589314864
A9UF02_HUMAN	29221	Intraocular pressure increased	5427	15	0.09546415079443535	0.10597660163416947	0.6413914005441065
A9UF02_HUMAN	29221	Intraventricular haemorrhage	1058	3	0.6388302171705216	0.4712957241076195	0.6580493383402283
A9UF02_HUMAN	29221	Investigation	3127	3	0.001441045306736115	0.0024909468246149336	0.2222285697659862
A9UF02_HUMAN	29221	Iritis	1272	2	0.19245824430705616	0.18796748479580408	0.3644315233327774
A9UF02_HUMAN	29221	Irritability	27173	18	7.427848074186028e-30	5.484342363935859e-29	0.1533954082744852
A9UF02_HUMAN	29221	Irritable bowel syndrome	6941	23	0.2326728411491777	0.21833057504279257	0.7693729977269749
A9UF02_HUMAN	29221	Ischaemic hepatitis	618	2	1.0	0.6330520235558572	0.7513442120659534
A9UF02_HUMAN	29221	Ischaemic stroke	6913	16	0.00963433825562172	0.014115252430433574	0.5368456252082091
A9UF02_HUMAN	29221	Jaundice neonatal	949	1	0.20425807784987987	0.196624914988612	0.2441076132028625
A9UF02_HUMAN	29221	Jaw disorder	3398	9	0.18678605686530686	0.18368963006621206	0.6145547818963774
A9UF02_HUMAN	29221	Joint arthroplasty	773	1	0.27466642640203076	0.2487269321510774	0.299759089787971
A9UF02_HUMAN	29221	Joint crepitation	1634	1	0.012839626161331195	0.018301003142627923	0.14171097202468685
A9UF02_HUMAN	29221	Joint destruction	665	2	1.0	0.6330520235558572	0.6980815002000411
A9UF02_HUMAN	29221	Joint dislocation	4035	12	0.22837648020167134	0.21510823788486616	0.6902729823007117
A9UF02_HUMAN	29221	Joint injury	8475	20	0.004553315971908561	0.007161780133140408	0.5474015785128649
A9UF02_HUMAN	29221	Joint range of motion decreased	3727	12	0.3798780205112169	0.3199209945072494	0.7475015364187789
A9UF02_HUMAN	29221	Joint stiffness	9585	9	2.8378740085261793e-09	9.032964851677158e-09	0.21749437717698647
A9UF02_HUMAN	29221	Joint swelling	35195	146	0.7131551442425581	0.5130314662497845	0.963977475197061
A9UF02_HUMAN	29221	Jugular vein thrombosis	848	2	0.5963308972310217	0.4470947707355632	0.5470780551213088
A9UF02_HUMAN	29221	Keratitis	1072	3	0.639334956247466	0.471468846991099	0.649431292749243
A9UF02_HUMAN	29221	Ketoacidosis	2744	1	0.00019188272493602624	0.000380863344414799	0.08436529978720876
A9UF02_HUMAN	29221	Kidney infection	6197	20	0.24232636799508084	0.22532566836372656	0.7492764038086891
A9UF02_HUMAN	29221	Kidney transplant rejection	2508	4	0.03183599189670763	0.040975991117862744	0.3696709541794147
A9UF02_HUMAN	29221	Knee arthroplasty	6554	9	4.3149264386237244e-05	9.332044178354857e-05	0.31821637216910964
A9UF02_HUMAN	29221	Knee operation	2722	6	0.10547677438286901	0.11474528637719549	0.5112238968696177
A9UF02_HUMAN	29221	Kyphosis	918	3	1.0	0.6330520235558572	0.7587344830043069
A9UF02_HUMAN	29221	Labile blood pressure	653	1	0.5388815725103737	0.4148176751588711	0.354929474411524
A9UF02_HUMAN	29221	Labyrinthitis	1319	3	0.3942515461212135	0.3278550481055265	0.5275395531526906
A9UF02_HUMAN	29221	Laceration	7208	7	5.047118956582728e-07	1.339568138527177e-06	0.22495460647329474
A9UF02_HUMAN	29221	Lactic acidosis	8748	8	1.0596248820828412e-08	3.230850392760877e-08	0.21182061081584772
A9UF02_HUMAN	29221	Lacunar infarction	1686	2	0.058210088784248874	0.06926276434279798	0.27483850037566937
A9UF02_HUMAN	29221	Laryngitis	4070	6	0.0025870593711149687	0.004271462229811139	0.34165455312447873
A9UF02_HUMAN	29221	Laryngospasm	1281	1	0.051373550267542506	0.06228884471664112	0.18079220102837001
A9UF02_HUMAN	29221	Leg amputation	1840	4	0.20947964877156666	0.20056238100111162	0.5041699723666964
A9UF02_HUMAN	29221	Legal problem	521	1	0.732457713508739	0.521778831127608	0.4450269563775262
A9UF02_HUMAN	29221	Lethargy	24564	66	4.8033962823283116e-05	0.000103317394980148	0.6234519202741733
A9UF02_HUMAN	29221	Leukocytoclastic vasculitis	2505	4	0.03182438234770489	0.04096364897266845	0.37011438195332047
A9UF02_HUMAN	29221	Libido decreased	6013	7	2.7334443030993476e-05	6.055067209572961e-05	0.2697133068954704
A9UF02_HUMAN	29221	Libido disorder	647	1	0.5375304185247414	0.414167561725361	0.3582260329973895
A9UF02_HUMAN	29221	Ligament rupture	1793	5	0.46647453513830966	0.3731725568596791	0.6471309209069173
A9UF02_HUMAN	29221	Ligament sprain	3055	8	0.20993222726555508	0.20088260222449372	0.6075852112013486
A9UF02_HUMAN	29221	Limb deformity	693	1	0.3825335226750701	0.3214371047659944	0.3344133198212625
A9UF02_HUMAN	29221	Limb discomfort	8452	25	0.06641603718033824	0.07772363733388643	0.6865255052697093
A9UF02_HUMAN	29221	Limb injury	7392	25	0.24797496730379032	0.22960078076924006	0.7853061535099554
A9UF02_HUMAN	29221	Limb operation	1296	1	0.05187929269831057	0.06279685097749575	0.17869808286974023
A9UF02_HUMAN	29221	Lip disorder	914	2	0.4515568239260376	0.36487462535131554	0.5074868800796352
A9UF02_HUMAN	29221	Lip oedema	1418	3	0.30473294293784575	0.2690994814615161	0.49063042540561186
A9UF02_HUMAN	29221	Lip swelling	13050	25	4.694959526065632e-06	1.1323177580636061e-05	0.44417277795837545
A9UF02_HUMAN	29221	Lipids increased	790	2	0.7809551682751927	0.5460437710012707	0.5873452216150092
A9UF02_HUMAN	29221	Lipoma	1096	4	1.0	0.6330520235558572	0.8476703931000499
A9UF02_HUMAN	29221	Listless	1468	5	0.8403283931002516	0.5774906898221216	0.7908886442799508
A9UF02_HUMAN	29221	Livedo reticularis	937	3	0.8042259224211273	0.558839616073782	0.7432998414870886
A9UF02_HUMAN	29221	Liver transplant rejection	922	1	0.2003333195642894	0.19373797250127867	0.25126386244985194
A9UF02_HUMAN	29221	Lobar pneumonia	2140	8	0.8682589011276803	0.5930905773636177	0.8683452807366364
A9UF02_HUMAN	29221	Local swelling	18318	61	0.04184469728776294	0.05206744936517312	0.7731968590839201
A9UF02_HUMAN	29221	Localised infection	8145	23	0.04146413865463377	0.051657325199121876	0.6553216447026857
A9UF02_HUMAN	29221	Logorrhoea	1834	4	0.20923136807117823	0.20039914864988376	0.505822988669538
A9UF02_HUMAN	29221	Long QT syndrome	681	2	1.0	0.6330520235558572	0.6816318624928237
A9UF02_HUMAN	29221	Loose tooth	1599	5	0.6991019633181933	0.5048960214362707	0.7258908949696161
A9UF02_HUMAN	29221	Loss of consciousness	57314	145	2.445969464564345e-12	9.440628159264895e-12	0.5869445418122667
A9UF02_HUMAN	29221	Loss of control of legs	2457	1	0.0005473536131872899	0.001014354439737939	0.09422394841869447
A9UF02_HUMAN	29221	Loss of libido	2955	4	0.010358098742543141	0.01507127748120998	0.3136753877550846
A9UF02_HUMAN	29221	Low density lipoprotein increased	3052	2	0.0004244649771765701	0.000799859176321476	0.1517468966008614
A9UF02_HUMAN	29221	Low turnover osteopathy	3646	1	5.5013820451619675e-06	1.3166750577832836e-05	0.06348807059432472
A9UF02_HUMAN	29221	Lower gastrointestinal haemorrhage	2730	10	0.7689041547320079	0.5408016433726706	0.8507868283688
A9UF02_HUMAN	29221	Lower respiratory tract infection	10710	29	0.009513900903759172	0.013957377973632402	0.6283125645700866
A9UF02_HUMAN	29221	Lumbar radiculopathy	740	2	0.7767101606986793	0.5444775407138184	0.6271382583097931
A9UF02_HUMAN	29221	Lumbar spinal stenosis	1683	6	0.8512776123361134	0.5835675792702747	0.8279571281442347
A9UF02_HUMAN	29221	Lung cancer metastatic	1473	6	1.0	0.6330520235558572	0.9464785984307305
A9UF02_HUMAN	29221	Lung infection pseudomonal	767	1	0.39511444737061796	0.32834987469788124	0.30210707221450867
A9UF02_HUMAN	29221	Lung transplant	979	1	0.1411213946688623	0.14637151046535887	0.23661964960768264
A9UF02_HUMAN	29221	Lupus-like syndrome	3431	5	0.005859309629519048	0.009012032285897094	0.33773207430868885
A9UF02_HUMAN	29221	Lyme disease	1138	2	0.25537894108854936	0.23505960331035453	0.4074190445709747
A9UF02_HUMAN	29221	Lymph node pain	772	2	0.7791113890464032	0.5452358115049761	0.6010753696527626
A9UF02_HUMAN	29221	Lymphocyte stimulation test positive	941	1	0.2029464858350658	0.1956733783749607	0.24618512480458896
A9UF02_HUMAN	29221	Lymphoedema	2173	6	0.32676545697131354	0.2845244283925224	0.6407402417618282
A9UF02_HUMAN	29221	Macular hole	553	1	0.7374028834340134	0.5236251761670405	0.4192282922396986
A9UF02_HUMAN	29221	Madarosis	2033	7	0.7330726650547661	0.5219744249078592	0.7995548475884477
A9UF02_HUMAN	29221	Major depression	2993	9	0.3287334361920061	0.2858746008475	0.6979645294392837
A9UF02_HUMAN	29221	Malabsorption	2797	11	0.8853681548153762	0.6029166784513482	0.913694971457089
A9UF02_HUMAN	29221	Malaise	162450	653	0.08080642201694196	0.0917144471165332	0.9339688208529997
A9UF02_HUMAN	29221	Mania	8073	7	2.07618225477467e-08	6.187805972792834e-08	0.2008304142343411
A9UF02_HUMAN	29221	Mastication disorder	1253	2	0.19100096612299758	0.18687674687726608	0.3699664545424678
A9UF02_HUMAN	29221	Mastitis	641	2	1.0	0.6330520235558572	0.7243005236817328
A9UF02_HUMAN	29221	Maternal drugs affecting foetus	8361	5	2.8249680213972064e-10	9.626051632502594e-10	0.13847176718305026
A9UF02_HUMAN	29221	Medical device complication	37086	12	2.8470111272186255e-52	3.29871485634075e-51	0.07490338802923242
A9UF02_HUMAN	29221	Medical device removal	968	1	0.14090355880609345	0.1462320483995342	0.23931128988243394
A9UF02_HUMAN	29221	Medication error	31017	27	3.740917316058586e-29	2.711097871766756e-28	0.20161918256019581
A9UF02_HUMAN	29221	Medication residue	2642	1	0.000270522742352918	0.0005255162880045104	0.08762363397058448
A9UF02_HUMAN	29221	Megacolon	694	2	1.0	0.6330520235558572	0.668826639642525
A9UF02_HUMAN	29221	Memory impairment	47272	92	2.021660704439615e-18	1.0398862159073397e-17	0.4512524288491066
A9UF02_HUMAN	29221	Meniere's disease	638	1	0.5356642621066292	0.4132592992820519	0.3632873113285928
A9UF02_HUMAN	29221	Meningitis aseptic	1490	3	0.2321890414549127	0.2180037263468063	0.46687427837857487
A9UF02_HUMAN	29221	Meningitis viral	656	2	1.0	0.6330520235558572	0.707688126349583
A9UF02_HUMAN	29221	Meniscus lesion	1610	3	0.17811032794727322	0.1765750032899277	0.43201123332230296
A9UF02_HUMAN	29221	Menometrorrhagia	900	1	0.19821912074242004	0.19228310913794286	0.25741270001814637
A9UF02_HUMAN	29221	Menorrhagia	12551	20	1.742880820390772e-07	4.817749899752132e-07	0.36934644851378756
A9UF02_HUMAN	29221	Menstrual disorder	3551	5	0.004418185506893392	0.006973049914453248	0.3263029008972273
A9UF02_HUMAN	29221	Menstruation delayed	4946	1	2.4118409045875056e-08	7.150899799693435e-08	0.04679757680815241
A9UF02_HUMAN	29221	Menstruation irregular	18408	7	2.7348297058328983e-25	1.774735739773124e-24	0.08803315695963236
A9UF02_HUMAN	29221	Mental disorder	17333	47	0.0008934603216302088	0.0015984563958621406	0.6292062254926958
A9UF02_HUMAN	29221	Mental impairment	10199	22	0.0003577987947818803	0.0006826931183373198	0.5002563015583079
A9UF02_HUMAN	29221	Mental status changes	14127	55	0.5194519329544365	0.40507734039350646	0.9044749113414758
A9UF02_HUMAN	29221	Metabolic acidosis	10867	29	0.008039083760937218	0.01199581467709048	0.6192107863234078
A9UF02_HUMAN	29221	Metabolic disorder	2796	7	0.1901072656247297	0.18624034685835647	0.5808168236694856
A9UF02_HUMAN	29221	Metabolic encephalopathy	1165	4	0.8241426769187289	0.5691139799874771	0.7972920493240779
A9UF02_HUMAN	29221	Metamorphopsia	748	2	0.7771995269805688	0.5446115764857423	0.6204129150571411
A9UF02_HUMAN	29221	Metastatic renal cell carcinoma	1399	2	0.14550851016135308	0.14969552414987178	0.33130138484797944
A9UF02_HUMAN	29221	Metrorrhagia	13650	10	1.09694643502611e-14	4.791061172524213e-14	0.16965837046650556
A9UF02_HUMAN	29221	Microcytic anaemia	935	3	0.8042135692511897	0.558839616073782	0.7448949055246146
A9UF02_HUMAN	29221	Micturition urgency	4327	10	0.04691672453101961	0.05753251969052808	0.5360528545663971
A9UF02_HUMAN	29221	Middle insomnia	7736	1	2.1394874267258483e-13	8.750628001341424e-13	0.029917778580001764
A9UF02_HUMAN	29221	Migraine	29531	44	2.0444266712648828e-17	1.009753056085607e-16	0.3453120616515006
A9UF02_HUMAN	29221	Migraine with aura	1047	3	0.6386211214212987	0.47120319188309895	0.6649828083802115
A9UF02_HUMAN	29221	Miosis	2735	1	0.0001902320072413575	0.00037779917376497545	0.0846430202327409
A9UF02_HUMAN	29221	Mitral valve disease	1071	2	0.3437948294229023	0.29580188334988766	0.43295419516616207
A9UF02_HUMAN	29221	Mobility decreased	24226	33	5.802559435510623e-16	2.692777344026374e-15	0.3156558744859401
A9UF02_HUMAN	29221	Monoparesis	804	2	0.7826142281590798	0.5468477356143134	0.5770923125095103
A9UF02_HUMAN	29221	Mood altered	11463	14	5.110551793173177e-09	1.595997267676004e-08	0.2829763509850983
A9UF02_HUMAN	29221	Mood swings	15616	6	1.6532703628729777e-21	9.50973283872671e-21	0.08894837308762854
A9UF02_HUMAN	29221	Motor dysfunction	3915	10	0.11041546249400033	0.11915706526338046	0.5926095193759632
A9UF02_HUMAN	29221	Mouth injury	1081	4	1.0	0.6330520235558572	0.8594763874329198
A9UF02_HUMAN	29221	Movement disorder	15190	22	8.459609579643558e-10	2.791394855446102e-09	0.33564796815393594
A9UF02_HUMAN	29221	Mucosal dryness	792	1	0.27535494748577993	0.2490726580076029	0.29255880823807034
A9UF02_HUMAN	29221	Mucous stools	970	2	0.4553614121618015	0.3666530277347837	0.4781281349510612
A9UF02_HUMAN	29221	Multi-organ disorder	1296	2	0.19505019332225626	0.1899961246614332	0.3576723606125404
A9UF02_HUMAN	29221	Multimorbidity	638	2	1.0	0.6330520235558572	0.727717035585892
A9UF02_HUMAN	29221	Multiple allergies	2296	1	0.0011262563745227958	0.001981769909611413	0.10083399447333927
A9UF02_HUMAN	29221	Multiple drug overdose	5505	2	2.5312057520926583e-08	7.491440966773835e-08	0.08410467647331042
A9UF02_HUMAN	29221	Multiple drug overdose intentional	3613	1	5.30478440088529e-06	1.2719465728479646e-05	0.06406811110639912
A9UF02_HUMAN	29221	Multiple fractures	3462	5	0.005905295109076572	0.009075504676986427	0.33470352518992424
A9UF02_HUMAN	29221	Multiple injuries	9301	3	8.102998835772378e-14	3.389021560161794e-13	0.0746657401536826
A9UF02_HUMAN	29221	Multiple myeloma	14416	41	0.0060324403067805385	0.009248641430597759	0.6600330233021814
A9UF02_HUMAN	29221	Multiple sclerosis	19272	16	5.424028685335597e-19	2.851238235657493e-18	0.19228418555572382
A9UF02_HUMAN	29221	Multiple sclerosis relapse	31303	1	4.098739034892285e-57	5.119865525642069e-56	0.007392946690828498
A9UF02_HUMAN	29221	Muscle contractions involuntary	1738	4	0.2684796421725463	0.24431844689923665	0.5338270295647374
A9UF02_HUMAN	29221	Muscle contracture	982	3	0.8054189135846179	0.5590247601102212	0.7091338630734839
A9UF02_HUMAN	29221	Muscle disorder	4145	17	1.0	0.6330520235558572	0.9530131527076867
A9UF02_HUMAN	29221	Muscle fatigue	1412	6	1.0	0.6330520235558572	0.9875420369117224
A9UF02_HUMAN	29221	Muscle haemorrhage	1762	7	1.0	0.6330520235558572	0.923018872486721
A9UF02_HUMAN	29221	Muscle rigidity	4888	10	0.011568607013633958	0.016652925254664035	0.47440347953323825
A9UF02_HUMAN	29221	Muscle spasticity	6076	3	3.524142287255863e-08	1.0314801936963672e-07	0.11431616202024383
A9UF02_HUMAN	29221	Muscle strain	3396	6	0.017771612389533897	0.024470499368856254	0.4095823315332984
A9UF02_HUMAN	29221	Muscle tightness	7000	10	4.831202081341449e-05	0.00010388395694029978	0.33106440245538427
A9UF02_HUMAN	29221	Muscle twitching	10232	13	8.703150729203347e-08	2.467475519545885e-07	0.29439105833369966
A9UF02_HUMAN	29221	Muscular weakness	47077	172	0.0310424578026662	0.04010142288757401	0.8485920686154128
A9UF02_HUMAN	29221	Musculoskeletal discomfort	6198	25	0.845888667903195	0.5805813778234682	0.9372024028685957
A9UF02_HUMAN	29221	Musculoskeletal disorder	7033	7	9.502618837112137e-07	2.458386496024122e-06	0.2305576602923705
A9UF02_HUMAN	29221	Musculoskeletal pain	27660	99	0.06553228789710469	0.07681152499254697	0.8312466062303635
A9UF02_HUMAN	29221	Musculoskeletal stiffness	28664	54	3.337835910643718e-12	1.2779204036640031e-11	0.43678283589936856
A9UF02_HUMAN	29221	Mutism	657	1	0.5398285561829066	0.4152773429658095	0.3527652702992586
A9UF02_HUMAN	29221	Mydriasis	5490	9	0.001242772497602184	0.0021699563727902924	0.3799901762172638
A9UF02_HUMAN	29221	Myocardial infarction	118668	268	1.4031337525652447e-32	1.1093073665109442e-31	0.5238087554119261
A9UF02_HUMAN	29221	Myoclonus	5130	4	5.4575194149297145e-06	1.3067139749543726e-05	0.18058058315748235
A9UF02_HUMAN	29221	Myodesopsia	3073	4	0.005552608962569371	0.008583607074772449	0.3016148808293433
A9UF02_HUMAN	29221	Myopia	1023	2	0.3404272566594753	0.293910341632889	0.4533085549780874
A9UF02_HUMAN	29221	Nail disorder	2637	10	0.8809891489123072	0.6003585251324239	0.880906042315621
A9UF02_HUMAN	29221	Nasal congestion	18401	36	9.594089165009519e-08	2.7112364469827267e-07	0.4536294377014588
A9UF02_HUMAN	29221	Nasal discomfort	3271	4	0.003047813619339087	0.00496783017560569	0.28333519108211036
A9UF02_HUMAN	29221	Nasal disorder	857	2	0.5971489921997207	0.4473833362122893	0.5413193387516108
A9UF02_HUMAN	29221	Nasal dryness	2231	2	0.008454554051304576	0.012556500286735649	0.207639315671883
A9UF02_HUMAN	29221	Nasal oedema	760	1	0.393332228173379	0.32733974138569266	0.30489330344705357
A9UF02_HUMAN	29221	Nasal polyps	501	2	1.0	0.6330520235558572	0.9275110914481508
A9UF02_HUMAN	29221	Nasal ulcer	655	1	0.5393505009356542	0.4150567302765709	0.3538440631747915
A9UF02_HUMAN	29221	Nasopharyngitis	59058	132	3.322945115067901e-17	1.6272664284043396e-16	0.5183900194439364
A9UF02_HUMAN	29221	Neck injury	1402	3	0.3033956594527961	0.26823660251141473	0.49624163827658385
A9UF02_HUMAN	29221	Neck pain	21538	45	5.113499753666478e-08	1.4779192904608977e-07	0.48451266827497846
A9UF02_HUMAN	29221	Necrotising fasciitis	1193	4	0.8244558981377227	0.5691451303078285	0.7785164585914672
A9UF02_HUMAN	29221	Negative thoughts	1222	1	0.07412189382442282	0.08533657642490412	0.18952826971033057
A9UF02_HUMAN	29221	Neonatal respiratory distress syndrome	2228	4	0.07328230912920852	0.0845380739445544	0.4162122613602763
A9UF02_HUMAN	29221	Nephrogenic systemic fibrosis	3056	9	0.3304661359796056	0.2870374152130451	0.6835333626015171
A9UF02_HUMAN	29221	Nephropathy toxic	3525	12	0.5184540225665907	0.4044665427423699	0.7904834067166988
A9UF02_HUMAN	29221	Nerve compression	3279	10	0.34808458758659233	0.29848971517349876	0.7079046109400845
A9UF02_HUMAN	29221	Nerve injury	4500	7	0.0027523940183092183	0.004521859427276213	0.3605381974658792
A9UF02_HUMAN	29221	Nervous system disorder	20010	51	5.9325806959843096e-05	0.00012609686052434145	0.5913179459457886
A9UF02_HUMAN	29221	Nervousness	25922	28	5.976673046017455e-21	3.372477879104134e-20	0.2502352855818638
A9UF02_HUMAN	29221	Neuralgia	7675	33	1.0	0.6330520235558572	0.9993015665321052
A9UF02_HUMAN	29221	Neurogenic bladder	1060	4	1.0	0.6330520235558572	0.8765682474102788
A9UF02_HUMAN	29221	Neuroleptic malignant syndrome	5286	2	7.499714834856392e-08	2.1374497319958904e-07	0.08759046832562968
A9UF02_HUMAN	29221	Neuropathy peripheral	28887	122	0.8924612309121364	0.6070324958435785	0.9814882709052759
A9UF02_HUMAN	29221	Neurotoxicity	3809	16	1.0	0.6330520235558572	0.9761730232167197
A9UF02_HUMAN	29221	Neutrophil percentage increased	862	2	0.5976650639594678	0.4476088764713831	0.5381721332937527
A9UF02_HUMAN	29221	Nightmare	16080	11	8.23001837946771e-18	4.13147588801231e-17	0.1584139766307455
A9UF02_HUMAN	29221	No adverse event	40246	42	6.305741434602431e-33	5.025958987378644e-32	0.24175178408330442
A9UF02_HUMAN	29221	Nocardiosis	621	1	0.5326903715801319	0.4118442702173988	0.3732484150263123
A9UF02_HUMAN	29221	Nocturnal dyspnoea	506	2	1.0	0.6330520235558572	0.9183095925250541
A9UF02_HUMAN	29221	Nodal arrhythmia	552	1	0.7372219279772727	0.5235487561844626	0.4199891421348705
A9UF02_HUMAN	29221	Nodal rhythm	884	2	0.6004394112263025	0.4489394251711575	0.5247483385857452
A9UF02_HUMAN	29221	Non-cardiac chest pain	1974	8	1.0	0.6330520235558572	0.941664363443799
A9UF02_HUMAN	29221	Nonspecific reaction	1909	2	0.021685341426451076	0.02920439954796318	0.2426995462153263
A9UF02_HUMAN	29221	Nuclear magnetic resonance imaging abnormal	2673	9	0.5548246262526497	0.4234755755128487	0.7818041125551135
A9UF02_HUMAN	29221	Nystagmus	2640	4	0.024226557344853773	0.032199381055692304	0.35115935859835146
A9UF02_HUMAN	29221	Obesity	5409	17	0.21254923155707628	0.2028376809153458	0.7296065086011372
A9UF02_HUMAN	29221	Obsessive-compulsive disorder	3602	1	5.272012772379113e-06	1.264494966224058e-05	0.06426382041552725
A9UF02_HUMAN	29221	Obstruction	984	1	0.14128984953802373	0.14648313594487936	0.23541609086094975
A9UF02_HUMAN	29221	Ocular discomfort	1691	5	0.5735544656557868	0.4343645632120252	0.6862811901432788
A9UF02_HUMAN	29221	Ocular vascular disorder	515	1	0.7317388690033927	0.5216196889036933	0.45022182357259455
A9UF02_HUMAN	29221	Oesophageal candidiasis	1446	4	0.5426666549883427	0.4165307104674592	0.6419251520563485
A9UF02_HUMAN	29221	Oesophageal haemorrhage	591	2	1.0	0.6330520235558572	0.7857861368974997
A9UF02_HUMAN	29221	Oesophageal pain	1958	8	1.0	0.6330520235558572	0.9493908402720559
A9UF02_HUMAN	29221	Oesophageal spasm	933	1	0.20175918008243163	0.19478464875889284	0.24829830184153823
A9UF02_HUMAN	29221	Oesophageal varices haemorrhage	941	2	0.45259542378425055	0.36525007631075523	0.49289460557255294
A9UF02_HUMAN	29221	Oestrogen receptor assay positive	1338	1	0.0360974548160402	0.04579246738022833	0.17308453052828243
A9UF02_HUMAN	29221	Off label use	104655	136	1.7585603610258707e-68	2.5705568297003548e-67	0.3011156474422703
A9UF02_HUMAN	29221	Oligomenorrhoea	1273	4	0.6707611827483551	0.489545372800352	0.7294374068284117
A9UF02_HUMAN	29221	Onychoclasis	1941	6	0.5993905285174486	0.4484290421102607	0.7175628443916701
A9UF02_HUMAN	29221	Onychomadesis	1131	2	0.2551027550983515	0.2348922168163805	0.40994511482075047
A9UF02_HUMAN	29221	Onychomycosis	1513	2	0.07627073064177269	0.08737096080121609	0.30630578069664277
A9UF02_HUMAN	29221	Open reduction of fracture	1143	1	0.1054103771496138	0.11468935589678435	0.20263924458521335
A9UF02_HUMAN	29221	Open wound	1299	4	0.6711301545809956	0.4896852115534759	0.7147923314789609
A9UF02_HUMAN	29221	Ophthalmoplegia	650	1	0.5381954829532983	0.4144916029467573	0.3565701345397745
A9UF02_HUMAN	29221	Optic neuritis	4570	12	0.08898782574420824	0.09980274640701288	0.6092514716533048
A9UF02_HUMAN	29221	Oral discomfort	5496	13	0.023141605779316704	0.030935120462316782	0.5486744893510992
A9UF02_HUMAN	29221	Oral disorder	3499	12	0.5178920210991313	0.40413788929972644	0.7963774613695908
A9UF02_HUMAN	29221	Oral fungal infection	1210	3	0.5049026284510775	0.39639949447852657	0.5751798276296113
A9UF02_HUMAN	29221	Oral herpes	5652	11	0.004178474883244381	0.006629350869802071	0.45125938494583406
A9UF02_HUMAN	29221	Oral infection	1835	4	0.20927010470448615	0.2004283722069714	0.505546733623842
A9UF02_HUMAN	29221	Oral mucosal erythema	550	2	1.0	0.6330520235558572	0.8445767055339913
A9UF02_HUMAN	29221	Oral mucosal exfoliation	714	3	1.0	0.6330520235558572	0.9764304528114498
A9UF02_HUMAN	29221	Oral pruritus	773	3	1.0	0.6330520235558572	0.901613054479144
A9UF02_HUMAN	29221	Oral surgery	848	2	0.5963308972310217	0.4470947707355632	0.5470780551213088
A9UF02_HUMAN	29221	Organ failure	2658	9	0.6542311444430551	0.48036516355238545	0.786231089409899
A9UF02_HUMAN	29221	Oropharyngeal pain	36951	67	1.996908334798135e-16	9.459168952598208e-16	0.42036490511313873
A9UF02_HUMAN	29221	Oropharyngeal swelling	790	3	1.0	0.6330520235558572	0.8821372959961129
A9UF02_HUMAN	29221	Orthostatic hypotension	6684	12	0.0007017741061032374	0.0012782317104887047	0.4162122613602763
A9UF02_HUMAN	29221	Osteitis	1366	5	1.0	0.6330520235558572	0.8501617094647819
A9UF02_HUMAN	29221	Osteoarthritis	16173	48	0.008003737389896752	0.011947907651051744	0.6888603306160034
A9UF02_HUMAN	29221	Osteonecrosis	27254	82	0.000698605171954518	0.0012728530817924678	0.6983641034865935
A9UF02_HUMAN	29221	Osteoporosis	13574	57	0.9476013515356767	0.6330520235558572	0.975852555081
A9UF02_HUMAN	29221	Otitis externa	525	2	1.0	0.6330520235558572	0.8849484409801669
A9UF02_HUMAN	29221	Otitis media	1551	5	0.6964543356015789	0.5035255020975933	0.7484282578147271
A9UF02_HUMAN	29221	Ovarian cancer	3267	14	1.0	0.6330520235558572	0.9959410520837352
A9UF02_HUMAN	29221	Ovarian cyst	5025	12	0.03934291390202296	0.04935240278212459	0.5539533628158315
A9UF02_HUMAN	29221	Ovarian cyst ruptured	595	2	1.0	0.6330520235558572	0.78048572450696
A9UF02_HUMAN	29221	Overdose	62475	32	1.9348455286798033e-75	3.0762874214974084e-74	0.11859213289114931
A9UF02_HUMAN	29221	Overweight	1478	3	0.23172817121976597	0.21767766291459123	0.4706725775925023
A9UF02_HUMAN	29221	Oxygen saturation decreased	15446	61	0.5384816489972815	0.41464237732555853	0.9175336403181755
A9UF02_HUMAN	29221	Oxygen supplementation	682	2	1.0	0.6330520235558572	0.6806294626950401
A9UF02_HUMAN	29221	PCO2 decreased	860	1	0.28516727417642496	0.25555874311920146	0.2693993216720764
A9UF02_HUMAN	29221	PCO2 increased	555	1	0.7377695322227389	0.5237839019376916	0.41771483270092713
A9UF02_HUMAN	29221	Pain	202793	483	3.1372433522399996e-48	3.4074378462075126e-47	0.5524836654825737
A9UF02_HUMAN	29221	Pain in extremity	120222	413	1.9281157849957705e-06	4.838488247672007e-06	0.7977196133148389
A9UF02_HUMAN	29221	Pain in jaw	11084	16	1.9369377174556492e-07	5.3314484651242e-07	0.3345341775443637
A9UF02_HUMAN	29221	Pain of skin	4372	10	0.03714156660713018	0.04690820994109138	0.5305227357091097
A9UF02_HUMAN	29221	Painful respiration	1137	2	0.2553341173833945	0.23503392422781696	0.4077780040816099
A9UF02_HUMAN	29221	Palpitations	46847	148	8.299616640547633e-05	0.00017319692219291087	0.7334048815352452
A9UF02_HUMAN	29221	Pancreatic cyst	691	1	0.38240040774307404	0.32142237104730403	0.33538263379175887
A9UF02_HUMAN	29221	Pancreatic disorder	1871	8	1.0	0.6330520235558572	0.9937263223459522
A9UF02_HUMAN	29221	Pancreatitis	26477	85	0.005455937659298918	0.008448143558188652	0.7453088614688791
A9UF02_HUMAN	29221	Pancreatitis acute	9139	24	0.012811308076226591	0.01826765181996534	0.6093183121877703
A9UF02_HUMAN	29221	Pancreatitis chronic	1100	3	0.6411160580661042	0.47239904063414034	0.632855106607968
A9UF02_HUMAN	29221	Pancreatitis necrotising	811	1	0.27697543841770633	0.24993732639199534	0.2856963176744613
A9UF02_HUMAN	29221	Panic attack	15689	20	1.7826309396391276e-11	6.538750211457914e-11	0.29537815727399785
A9UF02_HUMAN	29221	Panic disorder	1788	3	0.10142818310564769	0.11132550470506013	0.38893112154002285
A9UF02_HUMAN	29221	Panic reaction	3218	2	0.0002126000084335153	0.00041920783202650255	0.14391418987332938
A9UF02_HUMAN	29221	Papilloma viral infection	585	1	0.5289854060183676	0.4107693572211385	0.39625687896629047
A9UF02_HUMAN	29221	Paraesthesia	66206	115	2.363405076618206e-30	1.7684724853270336e-29	0.40266620252948304
A9UF02_HUMAN	29221	Paraesthesia oral	5403	6	4.157820505716466e-05	9.009853486796042e-05	0.25726961347005406
A9UF02_HUMAN	29221	Paranasal sinus discomfort	721	3	1.0	0.6330520235558572	0.9669109358620346
A9UF02_HUMAN	29221	Paranasal sinus hypersecretion	1894	2	0.021611823288742095	0.029119269054243113	0.24462369695170577
A9UF02_HUMAN	29221	Paranoia	8567	5	1.5005685155835712e-10	5.200487203537881e-10	0.13514016428189302
A9UF02_HUMAN	29221	Parkinsonism	3775	1	2.5673857006633627e-06	6.3627943657008775e-06	0.06131796961216577
A9UF02_HUMAN	29221	Partial seizures	1861	4	0.2106460171001006	0.20143499756469535	0.49846853487628134
A9UF02_HUMAN	29221	Partner stress	798	1	0.27576791474747986	0.2492418956687202	0.2903563579878464
A9UF02_HUMAN	29221	Patella fracture	933	1	0.20175918008243163	0.19478464875889284	0.24829830184153823
A9UF02_HUMAN	29221	Patent ductus arteriosus	2340	1	0.0007728762960622933	0.0013972230868366344	0.0989371600326266
A9UF02_HUMAN	29221	Pathogen resistance	1552	4	0.4334279966022658	0.3534124325995319	0.5979690369930585
A9UF02_HUMAN	29221	Pathological gambling	1745	2	0.041408111965365924	0.051598051594257906	0.26553530386266627
A9UF02_HUMAN	29221	Pelvic fracture	3238	11	0.5030173780494539	0.395404673369663	0.7888299319737991
A9UF02_HUMAN	29221	Pelvic inflammatory disease	848	1	0.28265146470785607	0.25379073549569625	0.2732160771148921
A9UF02_HUMAN	29221	Pelvic pain	9410	13	8.293814432505678e-07	2.1576540086831864e-06	0.3201428354913352
A9UF02_HUMAN	29221	Pemphigoid	1497	4	0.430762734338855	0.35183291534658756	0.6199973672238811
A9UF02_HUMAN	29221	Pemphigus	567	1	0.7400991541447314	0.5248416451574739	0.40885868783800994
A9UF02_HUMAN	29221	Penile pain	1767	1	0.009351222855634621	0.01374728950283895	0.13103851490164983
A9UF02_HUMAN	29221	Penile swelling	523	2	1.0	0.6330520235558572	0.888345555916751
A9UF02_HUMAN	29221	Penis disorder	1514	2	0.07627817003412429	0.08737800183864347	0.30610319750835135
A9UF02_HUMAN	29221	Peptic ulcer	1748	6	0.715584339659536	0.5143814183288885	0.7970632054522857
A9UF02_HUMAN	29221	Periarthritis	941	2	0.45259542378425055	0.36525007631075523	0.49289460557255294
A9UF02_HUMAN	29221	Periodontal disease	954	2	0.45363052648279234	0.3657273091599197	0.4861639019250287
A9UF02_HUMAN	29221	Periorbital haematoma	916	3	1.0	0.6330520235558572	0.7603965519703624
A9UF02_HUMAN	29221	Peripheral coldness	5754	19	0.31186443576286393	0.2740017404563295	0.7666724200540468
A9UF02_HUMAN	29221	Peripheral embolism	743	2	0.7768846949205201	0.5445302296672234	0.6245992370210894
A9UF02_HUMAN	29221	Peripheral sensory neuropathy	2014	5	0.3022865914365723	0.26754958077856833	0.5759432984477691
A9UF02_HUMAN	29221	Peritoneal dialysis	533	1	0.7341001196582655	0.5223221630957214	0.43498875435397294
A9UF02_HUMAN	29221	Peritonitis bacterial	5919	8	9.443423564045762e-05	0.00019570749270992778	0.31319779031137013
A9UF02_HUMAN	29221	Peroneal nerve palsy	2653	8	0.3739002167584916	0.3160170057664829	0.6999289748697577
A9UF02_HUMAN	29221	Persecutory delusion	985	2	0.45742540928773423	0.3678238313840362	0.4708321817218995
A9UF02_HUMAN	29221	Personality change	4692	10	0.018631260296642988	0.02548907748492577	0.4942631723970817
A9UF02_HUMAN	29221	Personality disorder	1190	2	0.26010035802176557	0.2383309642680204	0.3895858877379017
A9UF02_HUMAN	29221	Petit mal epilepsy	2205	4	0.07306364723704581	0.08433861212504341	0.42056159439584484
A9UF02_HUMAN	29221	Pharyngeal disorder	1494	1	0.026444034723058514	0.03478798905308837	0.15499934180597028
A9UF02_HUMAN	29221	Pharyngeal oedema	10661	28	0.006020128336306495	0.009231901505317185	0.6093851673898977
A9UF02_HUMAN	29221	Pharyngitis	4944	8	0.0021114500976555806	0.003545396622344482	0.3750632371415132
A9UF02_HUMAN	29221	Pharyngitis streptococcal	3677	1	3.6690279052471293e-06	8.948625420537448e-06	0.06295267065188075
A9UF02_HUMAN	29221	Phlebitis	2796	8	0.30970916844051155	0.2724772420062912	0.6640287440927221
A9UF02_HUMAN	29221	Photopsia	2903	7	0.15292960208209588	0.1557348317414826	0.5593570860546254
A9UF02_HUMAN	29221	Physical disability	1777	1	0.00946366449979622	0.013892725849654557	0.13030068542585227
A9UF02_HUMAN	29221	Pituitary tumour	684	2	1.0	0.6330520235558572	0.6786334818660223
A9UF02_HUMAN	29221	Plantar fasciitis	1300	1	0.052043289813532775	0.06296690630515935	0.17814781933511442
A9UF02_HUMAN	29221	Pneumonia legionella	665	1	0.5418304541832495	0.4161483908569487	0.3485150863197494
A9UF02_HUMAN	29221	Pneumonia primary atypical	1398	6	1.0	0.6330520235558572	0.9974742125703173
A9UF02_HUMAN	29221	Pneumonia staphylococcal	1054	2	0.3420905021988927	0.29475714123408675	0.43995060326295365
A9UF02_HUMAN	29221	Pneumonia viral	847	1	0.28245626077478325	0.25364942601743906	0.2735390275606544
A9UF02_HUMAN	29221	Poisoning	7268	6	7.814120787003314e-08	2.223768230703344e-07	0.1911985821946959
A9UF02_HUMAN	29221	Poisoning deliberate	1072	1	0.10066423327496021	0.11073029710571304	0.2160728453000127
A9UF02_HUMAN	29221	Pollakiuria	16550	38	2.248976158283057e-05	5.031666937934296e-05	0.5325661735719426
A9UF02_HUMAN	29221	Polyarthritis	1476	5	0.8406206153676972	0.5776406389792004	0.7865874143994344
A9UF02_HUMAN	29221	Polycystic ovaries	596	2	1.0	0.6330520235558572	0.7791717754758034
A9UF02_HUMAN	29221	Polycythaemia	781	2	0.7799912653643664	0.5456215721326059	0.594130981556646
A9UF02_HUMAN	29221	Polydactyly	530	1	0.7336646173966388	0.5221750205328612	0.43745560929359856
A9UF02_HUMAN	29221	Polydipsia	1946	4	0.16266840273643463	0.16388661797460768	0.47665091105316915
A9UF02_HUMAN	29221	Polyhydramnios	508	1	0.7309904158389495	0.5214796389752692	0.45643790397694994
A9UF02_HUMAN	29221	Polymyalgia rheumatica	1005	3	0.8066659685558553	0.5594965198561325	0.6928563392704
A9UF02_HUMAN	29221	Polymyositis	855	2	0.5969547794089916	0.4473101710737644	0.5425885517381327
A9UF02_HUMAN	29221	Poor quality drug administered	4755	5	8.854543323816001e-05	0.00018417398054890082	0.24359370243822487
A9UF02_HUMAN	29221	Poor quality sleep	7082	16	0.006176442569752081	0.009447016121890537	0.5240057001218537
A9UF02_HUMAN	29221	Portal vein thrombosis	1448	4	0.5428275756369992	0.41660848875061657	0.6410360590479602
A9UF02_HUMAN	29221	Post procedural haematoma	898	2	0.6026137203332697	0.45011064557537156	0.5165491457953428
A9UF02_HUMAN	29221	Post procedural haemorrhage	5579	13	0.02352317005692645	0.03138073995927003	0.5404926742925039
A9UF02_HUMAN	29221	Post procedural infection	3276	6	0.03092192368046069	0.039965626962609045	0.4246128758097497
A9UF02_HUMAN	29221	Postictal state	632	2	1.0	0.6330520235558572	0.7346476740200433
A9UF02_HUMAN	29221	Postmenopausal haemorrhage	893	3	1.0	0.6330520235558572	0.7800472493808324
A9UF02_HUMAN	29221	Postnasal drip	621	2	1.0	0.6330520235558572	0.747702802314422
A9UF02_HUMAN	29221	Postoperative wound complication	608	1	0.5309298851634158	0.4111040942288399	0.3812422031570241
A9UF02_HUMAN	29221	Postoperative wound infection	2197	5	0.1888037690312636	0.18527811485417098	0.5278604409587445
A9UF02_HUMAN	29221	Postpartum haemorrhage	506	1	0.7307948766378315	0.5214399527552953	0.4582455788441854
A9UF02_HUMAN	29221	Posture abnormal	1500	2	0.10805812628485462	0.11702495686532732	0.3089639750551584
A9UF02_HUMAN	29221	Pre-eclampsia	1978	6	0.49186578927729896	0.3888494526112378	0.7040994441672828
A9UF02_HUMAN	29221	Precancerous cells present	574	1	0.528615942747081	0.41070239159277466	0.40386390456599236
A9UF02_HUMAN	29221	Pregnancy	15254	22	6.374315852150597e-10	2.1206971004879107e-09	0.3342376825734572
A9UF02_HUMAN	29221	Pregnancy on contraceptive	659	2	1.0	0.6330520235558572	0.7044566737178497
A9UF02_HUMAN	29221	Pregnancy with contraceptive device	4896	1	3.675437134562934e-08	1.0743172093473996e-07	0.047275590871565604
A9UF02_HUMAN	29221	Premature rupture of membranes	1387	4	0.5400678267630766	0.415364327358803	0.6693102453111023
A9UF02_HUMAN	29221	Premature separation of placenta	763	1	0.39408208748302004	0.3277584908987874	0.3036929361106478
A9UF02_HUMAN	29221	Presyncope	8993	21	0.0027442277532165834	0.004509290917971846	0.5416511774010907
A9UF02_HUMAN	29221	Primary sequestrum	923	3	1.0	0.6330520235558572	0.7546109260314574
A9UF02_HUMAN	29221	Procedural complication	5572	12	0.010206692981564871	0.014871982683115001	0.49945471363233157
A9UF02_HUMAN	29221	Procedural hypotension	578	1	0.5287068131784517	0.41073500764084386	0.40106415479430435
A9UF02_HUMAN	29221	Procedural pain	10501	10	5.511298021803218e-10	1.84166309069729e-09	0.22058337366915798
A9UF02_HUMAN	29221	Procedural site reaction	590	2	1.0	0.6330520235558572	0.7871225078786178
A9UF02_HUMAN	29221	Product colour issue	882	2	0.6001541765267477	0.4488026235180792	0.5259409484461673
A9UF02_HUMAN	29221	Product lot number issue	611	1	0.5312951846378775	0.4112465399340723	0.3793672415021535
A9UF02_HUMAN	29221	Product quality issue	97143	25	4.5838798065675035e-143	1.3150575385132736e-141	0.05957032097971376
A9UF02_HUMAN	29221	Product substitution issue	18889	22	1.1879808500577484e-14	5.18000699737233e-14	0.26984196644717756
A9UF02_HUMAN	29221	Product taste abnormal	3091	2	0.0002930482470467097	0.0005663537493777722	0.1498310244845022
A9UF02_HUMAN	29221	Progesterone receptor assay positive	1122	1	0.10332685147762061	0.11297424981198971	0.20643534104934314
A9UF02_HUMAN	29221	Progressive multifocal leukoencephalopathy	3438	9	0.1504787756822502	0.15369806597144037	0.6073858722212956
A9UF02_HUMAN	29221	Prostatic disorder	1391	2	0.14466705349459885	0.1490256721931943	0.3332095281732378
A9UF02_HUMAN	29221	Prostatitis	1361	5	1.0	0.6330520235558572	0.8532965240277051
A9UF02_HUMAN	29221	Pruritus	108673	347	4.360018655758139e-09	1.3683770489602186e-08	0.7412870779753783
A9UF02_HUMAN	29221	Pruritus generalised	14405	32	4.174779862075673e-05	9.044651123179681e-05	0.5152194082044136
A9UF02_HUMAN	29221	Pruritus genital	923	2	0.45173246338761414	0.36496156770923593	0.5025277248997039
A9UF02_HUMAN	29221	Psoriasis	38747	17	7.1943417179842355e-50	8.02521068129409e-49	0.1015759952072639
A9UF02_HUMAN	29221	Psoriatic arthropathy	6687	4	1.940569838055345e-08	5.797691975175323e-08	0.13850906318498496
A9UF02_HUMAN	29221	Psychiatric symptom	3424	3	0.0005590170131703433	0.0010340456465899148	0.2029354141914472
A9UF02_HUMAN	29221	Psychomotor hyperactivity	8184	10	1.1086672448182032e-06	2.8503188616995456e-06	0.283109881718025
A9UF02_HUMAN	29221	Psychomotor skills impaired	930	3	0.8041984098238639	0.558839616073782	0.7489126773990732
A9UF02_HUMAN	29221	Psychotic behaviour	547	2	1.0	0.6330520235558572	0.8492257516194995
A9UF02_HUMAN	29221	Psychotic disorder	13887	12	9.992703913407563e-14	4.160171075615908e-13	0.20014185281410907
A9UF02_HUMAN	29221	Pulmonary arterial hypertension	5300	15	0.11411032968197102	0.12257268346807641	0.656804211872224
A9UF02_HUMAN	29221	Pulmonary embolism	50503	100	6.257928903685687e-19	3.282274318979292e-18	0.4591274672466195
A9UF02_HUMAN	29221	Pulmonary infarction	1679	4	0.34540606283426334	0.2968026579891521	0.5526304891135848
A9UF02_HUMAN	29221	Pulmonary thrombosis	3352	10	0.2903700547325839	0.2592781388723194	0.6924417035197894
A9UF02_HUMAN	29221	Pulse absent	2857	9	0.4718221685462669	0.376373275416642	0.7312942962945304
A9UF02_HUMAN	29221	Pupil fixed	1174	1	0.07183472899500573	0.0832162565175114	0.1972839022304464
A9UF02_HUMAN	29221	Pyelonephritis acute	757	3	1.0	0.6330520235558572	0.9207454269879851
A9UF02_HUMAN	29221	Pyloric stenosis	501	2	1.0	0.6330520235558572	0.9275110914481508
A9UF02_HUMAN	29221	Quadriplegia	953	2	0.45353892595078005	0.365675617508413	0.4866751152814167
A9UF02_HUMAN	29221	Quality of life decreased	6168	11	0.0012052034907805657	0.0021089827513798374	0.4134406676107601
A9UF02_HUMAN	29221	Radiation skin injury	587	1	0.5290925431386752	0.4107693572211385	0.3949044664100915
A9UF02_HUMAN	29221	Radiculopathy	1052	2	0.34192618457920465	0.2946543855713865	0.44078860441202594
A9UF02_HUMAN	29221	Rash macular	11322	35	0.05178261114947183	0.0626961095319884	0.7175946315292794
A9UF02_HUMAN	29221	Rash pruritic	20005	77	0.357527918031309	0.3047754489836063	0.8941629532996862
A9UF02_HUMAN	29221	Rash pustular	3924	13	0.3940371689421547	0.32773195317161147	0.769210489673249
A9UF02_HUMAN	29221	Rash vesicular	1488	5	0.8411105184430794	0.577883269327427	0.7802225802977533
A9UF02_HUMAN	29221	Rebound effect	1103	1	0.10192832671739582	0.11175546468901561	0.20999457106743524
A9UF02_HUMAN	29221	Rectal discharge	2620	2	0.0023280096866019114	0.003875583162841967	0.17678687342728314
A9UF02_HUMAN	29221	Refusal of treatment by patient	4321	11	0.08046533395958763	0.09138000489549108	0.5906158214569489
A9UF02_HUMAN	29221	Rehabilitation therapy	659	1	0.540315680924535	0.41547505015427033	0.3516930354351271
A9UF02_HUMAN	29221	Renal artery stenosis	740	2	0.7767101606986793	0.5444775407138184	0.6271382583097931
A9UF02_HUMAN	29221	Renal injury	4275	8	0.009908150242924373	0.014479562617531472	0.4338673865785116
A9UF02_HUMAN	29221	Renal mass	744	2	0.776945280415068	0.5445460624176708	0.6237574590736217
A9UF02_HUMAN	29221	Renal pain	3850	7	0.013285584021089064	0.01885259613009716	0.4215191572246149
A9UF02_HUMAN	29221	Renal transplant	1532	4	0.4320107576429756	0.3525403914099754	0.6057958568489885
A9UF02_HUMAN	29221	Resorption bone increased	764	1	0.39433670887033556	0.32790112216713346	0.30329491129267844
A9UF02_HUMAN	29221	Respiration abnormal	1241	2	0.19035825764175335	0.1864085322594507	0.3735496647559542
A9UF02_HUMAN	29221	Respiratory acidosis	1523	2	0.07638229784464194	0.08746970587581626	0.30429193598463333
A9UF02_HUMAN	29221	Respiratory arrest	17557	41	1.8138978547979898e-05	4.103525262349006e-05	0.5416747379520929
A9UF02_HUMAN	29221	Respiratory depression	4822	4	2.0987013446580042e-05	4.7125237250906164e-05	0.19212454737759535
A9UF02_HUMAN	29221	Respiratory rate decreased	1520	4	0.43140347186558414	0.3521908246330092	0.6105910747132286
A9UF02_HUMAN	29221	Respiratory rate increased	4152	10	0.07324710294348757	0.08450919271242956	0.5587011523812497
A9UF02_HUMAN	29221	Respiratory syncytial virus infection	1299	2	0.19543186055175893	0.19030888821581723	0.35684505368745356
A9UF02_HUMAN	29221	Respiratory tract congestion	6510	4	3.81182781371462e-08	1.1128777401773861e-07	0.14227729315481932
A9UF02_HUMAN	29221	Respiratory tract infection	7684	31	0.7936891900480803	0.5528748771614821	0.9373885452509764
A9UF02_HUMAN	29221	Restless legs syndrome	7493	8	8.468973608961279e-07	2.2010586916142795e-06	0.24733629105284025
A9UF02_HUMAN	29221	Restlessness	15739	18	1.3002024784427147e-12	5.095700803010997e-12	0.2649610273960718
A9UF02_HUMAN	29221	Retching	8274	25	0.07717166115954535	0.08819481931524147	0.7013396087898947
A9UF02_HUMAN	29221	Retinal oedema	814	2	0.5945877128647907	0.4466801332691234	0.5699852643258956
A9UF02_HUMAN	29221	Retinal vein occlusion	1260	5	1.0	0.6330520235558572	0.9219681964793371
A9UF02_HUMAN	29221	Rhabdomyolysis	19082	51	0.0003060220144240806	0.0005896802600917993	0.620152114083968
A9UF02_HUMAN	29221	Rheumatoid arthritis	29566	18	9.053308929459857e-34	7.357563212656591e-33	0.14097239446641552
A9UF02_HUMAN	29221	Rhinitis	2829	9	0.4704185040719572	0.37555499922982283	0.7385553744137668
A9UF02_HUMAN	29221	Rhinorrhoea	18504	26	4.375549668351677e-12	1.663451633351353e-11	0.3256177319095223
A9UF02_HUMAN	29221	Rib fracture	7820	33	1.0	0.6330520235558572	0.9806937936867021
A9UF02_HUMAN	29221	Rosacea	1447	3	0.308075661279141	0.2713785464893692	0.4807770442859701
A9UF02_HUMAN	29221	Rotator cuff syndrome	5943	8	9.491929473284557e-05	0.00019664417441476198	0.3119312786066569
A9UF02_HUMAN	29221	Salivary hypersecretion	3848	4	0.0004836236155049946	0.0009040824250100997	0.24080542904923374
A9UF02_HUMAN	29221	Sarcoidosis	1852	6	0.5958635138683558	0.446928877495604	0.7521582361310302
A9UF02_HUMAN	29221	Scab	3565	14	0.8977102550980222	0.6100260625131705	0.9123616565554465
A9UF02_HUMAN	29221	Scar	7688	20	0.01845936847419654	0.02528448517455163	0.6035837697347773
A9UF02_HUMAN	29221	Schizophrenia	3474	11	0.36394225032750604	0.3092175725442048	0.7350719579784724
A9UF02_HUMAN	29221	Scoliosis	2651	10	0.8812284334815443	0.6004864695866139	0.8762363397058448
A9UF02_HUMAN	29221	Scratch	2755	5	0.04083273724563511	0.05098449031451332	0.42075275875693385
A9UF02_HUMAN	29221	Screaming	3243	3	0.0010666115484728026	0.001885238017163358	0.21427223825584593
A9UF02_HUMAN	29221	Seasonal allergy	2932	7	0.12065581611953033	0.12852202761129944	0.5538113234920325
A9UF02_HUMAN	29221	Secretion discharge	2793	10	0.6649663854109497	0.48644178713519654	0.8315271912192369
A9UF02_HUMAN	29221	Sedation	9553	2	1.8980518324217424e-15	8.600975439892417e-15	0.048458594349557876
A9UF02_HUMAN	29221	Self esteem decreased	882	1	0.19724462383472424	0.19166562996366016	0.2626719833329326
A9UF02_HUMAN	29221	Self injurious behaviour	3286	2	0.0001492373586024067	0.00030084811291011224	0.14093423709885117
A9UF02_HUMAN	29221	Self-medication	2421	2	0.004419000366613646	0.00697419482368013	0.19133031609451315
A9UF02_HUMAN	29221	Semen volume decreased	732	2	0.776298401603479	0.5444031609785459	0.6340110063460647
A9UF02_HUMAN	29221	Sensation of foreign body	2917	2	0.0005766465611608304	0.0010641720005622774	0.15877462594601277
A9UF02_HUMAN	29221	Sensation of heaviness	4127	6	0.0026435131820507426	0.00435701831893366	0.33692892596405766
A9UF02_HUMAN	29221	Sensation of pressure	984	2	0.4572748638008679	0.3677328192798782	0.4713116442287446
A9UF02_HUMAN	29221	Sensitivity of teeth	1241	5	1.0	0.6330520235558572	0.9361408467488415
A9UF02_HUMAN	29221	Sensory disturbance	7653	10	6.5441685452124135e-06	1.554055043673543e-05	0.30277903613281903
A9UF02_HUMAN	29221	Sensory loss	3575	12	0.5204907479398868	0.4057175072437392	0.7793904596676293
A9UF02_HUMAN	29221	Seroma	677	1	0.3818020524278469	0.3211719476307342	0.34232842798271246
A9UF02_HUMAN	29221	Serotonin syndrome	6935	3	1.0633260483324412e-09	3.485834230267572e-09	0.10015032486280162
A9UF02_HUMAN	29221	Serum sickness	1407	1	0.03747650954095337	0.04727533513687458	0.16459033948528706
A9UF02_HUMAN	29221	Sexual dysfunction	5067	4	7.688373944331936e-06	1.811951295466947e-05	0.18282758626609805
A9UF02_HUMAN	29221	Shock	10168	40	0.6487338139363007	0.476968925509015	0.9139574143614282
A9UF02_HUMAN	29221	Shoulder arthroplasty	642	1	0.5364694800043524	0.4136415021214957	0.3610203078257623
A9UF02_HUMAN	29221	Shoulder operation	1101	2	0.34809999240476597	0.2984981276683396	0.4211356093108528
A9UF02_HUMAN	29221	Sick sinus syndrome	1271	3	0.3908785515059491	0.326012490209173	0.5475095046915938
A9UF02_HUMAN	29221	Sinus arrest	738	2	0.776599867283456	0.5444540625545609	0.6288424383595479
A9UF02_HUMAN	29221	Sinus arrhythmia	818	2	0.5946781917344037	0.4467187500282043	0.5671912189125334
A9UF02_HUMAN	29221	Sinus bradycardia	4505	6	0.0008377204906323021	0.0015052213330510734	0.3086206054451837
A9UF02_HUMAN	29221	Sinus congestion	5863	13	0.012071761362024242	0.017310745731770813	0.5142533718140302
A9UF02_HUMAN	29221	Sinus disorder	6786	12	0.0005442434199168906	0.0010090850105385408	0.4099451148207504
A9UF02_HUMAN	29221	Sinus headache	3620	3	0.0002963209481167796	0.000572239023592919	0.19193863753081028
A9UF02_HUMAN	29221	Sinusitis	36408	57	6.048001376104508e-20	3.2953164123224185e-19	0.36286756862341824
A9UF02_HUMAN	29221	Sjogren's syndrome	1553	1	0.018247044856943014	0.02503211760044521	0.14910696992030517
A9UF02_HUMAN	29221	Skeletal injury	1216	2	0.1897267429192862	0.18598545188373353	0.3812422031570241
A9UF02_HUMAN	29221	Skin burning sensation	8792	17	0.00022609701724300203	0.0004440731882241294	0.44832345235069304
A9UF02_HUMAN	29221	Skin infection	3263	6	0.030686714843290046	0.03969765657523776	0.4263076769720238
A9UF02_HUMAN	29221	Skin irritation	5336	8	0.0007130881283885522	0.0012970891769750795	0.34746849446893935
A9UF02_HUMAN	29221	Skin laceration	2472	3	0.012862595547229093	0.01832889769874573	0.28118349613160826
A9UF02_HUMAN	29221	Skin necrosis	2363	4	0.056529414877732845	0.06756982005857264	0.39239341639052755
A9UF02_HUMAN	29221	Skin odour abnormal	1706	2	0.04082652867667948	0.05097862187614363	0.2716126963806498
A9UF02_HUMAN	29221	Skin papilloma	1472	6	1.0	0.6330520235558572	0.947124218211379
A9UF02_HUMAN	29221	Skin striae	544	2	1.0	0.6330520235558572	0.8539262631598289
A9UF02_HUMAN	29221	Skin warm	2256	7	0.5172653370728739	0.40377722236244507	0.7202748426919499
A9UF02_HUMAN	29221	Skull fracture	694	1	0.3826044753792113	0.32144983465540655	0.3339307609182015
A9UF02_HUMAN	29221	Sleep apnoea syndrome	7332	21	0.06033398621421752	0.07145496253288214	0.6647099389471463
A9UF02_HUMAN	29221	Sleep disorder	21451	34	5.198776499403803e-12	1.967328154104826e-11	0.3673752901318888
A9UF02_HUMAN	29221	Sleep talking	757	1	0.39260354281856097	0.3269361866649861	0.30610319750835135
A9UF02_HUMAN	29221	Sleep terror	1092	1	0.10133380508367609	0.11125854588669275	0.21211183988663027
A9UF02_HUMAN	29221	Sluggishness	3848	4	0.0004836236155049946	0.0009040824250100997	0.24080542904923374
A9UF02_HUMAN	29221	Smear cervix abnormal	942	3	0.8042724678692708	0.558839616073782	0.7393419083588294
A9UF02_HUMAN	29221	Sneezing	7283	8	1.521101802421604e-06	3.8586522283591555e-06	0.2544758953306541
A9UF02_HUMAN	29221	Snoring	1466	3	0.23146218351872155	0.21749612449032787	0.4745331865679705
A9UF02_HUMAN	29221	Social avoidant behaviour	2987	1	6.468702164721737e-05	0.00013684253459962154	0.07749967090298514
A9UF02_HUMAN	29221	Soft tissue infection	704	1	0.3834731795531843	0.3217915907562141	0.3291806789705741
A9UF02_HUMAN	29221	Somnambulism	3746	1	3.917983382267455e-06	9.526843344493994e-06	0.06179279501103168
A9UF02_HUMAN	29221	Somnolence	76574	103	1.531825968262787e-48	1.6721565383624862e-47	0.3116952018880399
A9UF02_HUMAN	29221	Speech disorder	22697	56	5.8067921006179814e-06	1.3863632097115295e-05	0.5723768813088451
A9UF02_HUMAN	29221	Spinal column stenosis	3706	14	0.8007892461348114	0.5569225322166795	0.8775179421528685
A9UF02_HUMAN	29221	Spinal compression fracture	3524	11	0.36526308977299543	0.31012605853893616	0.7246097894903073
A9UF02_HUMAN	29221	Spinal deformity	811	3	1.0	0.6330520235558572	0.8592104603328475
A9UF02_HUMAN	29221	Spinal disorder	4142	16	0.8115905030075812	0.5620192644062341	0.8973883366604503
A9UF02_HUMAN	29221	Spinal fusion surgery	1524	2	0.07639798784112144	0.08748362159430305	0.30409200698595745
A9UF02_HUMAN	29221	Spinal laminectomy	553	2	1.0	0.6330520235558572	0.839978284269741
A9UF02_HUMAN	29221	Spinal operation	1387	2	0.1442749630167786	0.14870956514437794	0.33417186616074174
A9UF02_HUMAN	29221	Spinal osteoarthritis	4746	19	0.9113356596588895	0.6181988879758349	0.9301600019060626
A9UF02_HUMAN	29221	Spondylitis	957	1	0.20569191377337714	0.19771504900948048	0.24206487166978413
A9UF02_HUMAN	29221	Sputum culture positive	738	2	0.776599867283456	0.5444540625545609	0.6288424383595479
A9UF02_HUMAN	29221	Staphylococcal skin infection	542	2	1.0	0.6330520235558572	0.8570889530233838
A9UF02_HUMAN	29221	Staring	1287	1	0.05155510816595648	0.06246756636150337	0.1799486915367913
A9UF02_HUMAN	29221	Status epilepticus	4223	12	0.1585680949773141	0.16049795070788264	0.6594557605784287
A9UF02_HUMAN	29221	Steatorrhoea	1565	1	0.018385089581516047	0.025195444540734357	0.1479629266728348
A9UF02_HUMAN	29221	Stevens-Johnson syndrome	12452	37	0.0233509301433315	0.031177839421604292	0.6896752831819254
A9UF02_HUMAN	29221	Stillbirth	2293	8	0.7477681596082899	0.528872407851894	0.8102022488098508
A9UF02_HUMAN	29221	Strabismus	1337	5	1.0	0.6330520235558572	0.8686712361723484
A9UF02_HUMAN	29221	Stress	25226	56	3.484156956774849e-08	1.0201568564617988e-07	0.5148663078948574
A9UF02_HUMAN	29221	Stress cardiomyopathy	1382	2	0.14381187677072096	0.14834385936350583	0.33538263379175887
A9UF02_HUMAN	29221	Stress fracture	3247	13	1.0	0.6330520235558572	0.9302356911292755
A9UF02_HUMAN	29221	Stress urinary incontinence	734	1	0.3877454231111839	0.3242041486895062	0.31570807273712637
A9UF02_HUMAN	29221	Stridor	1405	4	0.5404096038168875	0.4155130712717931	0.6607109702107455
A9UF02_HUMAN	29221	Stupor	1737	4	0.2684300657045276	0.2442825419081584	0.5341350659349421
A9UF02_HUMAN	29221	Subclavian vein thrombosis	627	2	1.0	0.6330520235558572	0.7405248554122036
A9UF02_HUMAN	29221	Subcutaneous abscess	1942	7	0.8611816309705453	0.5890698924063555	0.8371566517902818
A9UF02_HUMAN	29221	Subcutaneous haematoma	540	2	1.0	0.6330520235558572	0.860275157309716
A9UF02_HUMAN	29221	Substance abuse	3731	2	2.693734458474043e-05	5.972545023348817e-05	0.12411585804039348
A9UF02_HUMAN	29221	Sudden cardiac death	2455	8	0.5367275389360181	0.4137611022564279	0.7565640124767099
A9UF02_HUMAN	29221	Sudden hearing loss	821	3	1.0	0.6330520235558572	0.8487066649742553
A9UF02_HUMAN	29221	Suffocation feeling	990	1	0.14154870279858284	0.14664427304385072	0.23398788404076204
A9UF02_HUMAN	29221	Suicidal behaviour	1958	1	0.004711217285952282	0.00738609580170348	0.11824937011564314
A9UF02_HUMAN	29221	Suicidal ideation	40687	42	1.9321427113062504e-33	1.558718210996126e-32	0.2391287668172019
A9UF02_HUMAN	29221	Suicide attempt	25301	33	2.625551407060268e-17	1.291306425666005e-16	0.3022266333480429
A9UF02_HUMAN	29221	Sunburn	3306	8	0.10933875026621326	0.1181867031012324	0.561343886758796
A9UF02_HUMAN	29221	Superior sagittal sinus thrombosis	529	2	1.0	0.6330520235558572	0.8782315647677936
A9UF02_HUMAN	29221	Swollen tongue	14345	54	0.370750540323603	0.313934938025449	0.8744214495193434
A9UF02_HUMAN	29221	Syncope	43174	100	5.776340886663269e-12	2.1796421139896188e-11	0.5372475677121086
A9UF02_HUMAN	29221	Synovial cyst	1764	4	0.27017573479673185	0.2455271130836896	0.5259409484461673
A9UF02_HUMAN	29221	Synovitis	1571	4	0.4352311591510116	0.3545960721304984	0.5907186147193711
A9UF02_HUMAN	29221	Systemic lupus erythematosus	7417	12	0.00011692705859301221	0.0002391974052306249	0.3750125871432496
A9UF02_HUMAN	29221	Tachycardia	35142	102	2.4914858468333433e-05	5.545040005557998e-05	0.6736366942426937
A9UF02_HUMAN	29221	Tardive dyskinesia	21357	3	2.1987042057625132e-35	1.854486937026667e-34	0.03251110105595864
A9UF02_HUMAN	29221	Tearfulness	2190	2	0.008223735390032242	0.012244350763114935	0.2115301803622611
A9UF02_HUMAN	29221	Temperature intolerance	3141	13	1.0	0.6330520235558572	0.9617590233734261
A9UF02_HUMAN	29221	Temporal arteritis	584	2	1.0	0.6330520235558572	0.7952371729082942
A9UF02_HUMAN	29221	Temporomandibular joint syndrome	1437	3	0.3067917000836045	0.2705034977055912	0.48412974333956826
A9UF02_HUMAN	29221	Tenderness	4348	17	0.8163053823366806	0.56466441958734	0.9083440993713533
A9UF02_HUMAN	29221	Tendon disorder	2961	6	0.06550328590039549	0.07678152620235361	0.46987617729200737
A9UF02_HUMAN	29221	Tendon injury	2071	6	0.40236226645961704	0.3329580466427253	0.6723893965607176
A9UF02_HUMAN	29221	Tendon pain	2669	1	0.00027840382240066177	0.0005398143742729476	0.08673688804959281
A9UF02_HUMAN	29221	Tendon rupture	5987	11	0.002018736255241856	0.0034012051020577637	0.4259628832796937
A9UF02_HUMAN	29221	Tendonitis	7067	17	0.013571043165863621	0.019205247922208436	0.558019616223735
A9UF02_HUMAN	29221	Tension	3013	1	6.610669941583315e-05	0.0001396706322248463	0.07683068303994477
A9UF02_HUMAN	29221	Tension headache	1251	1	0.05088345674007698	0.06180890988697354	0.1851312138530509
A9UF02_HUMAN	29221	Testicular pain	1393	5	1.0	0.6330520235558572	0.8336239816870088
A9UF02_HUMAN	29221	Tetany	859	2	0.5973501944957667	0.4474673233162776	0.5400560497463562
A9UF02_HUMAN	29221	Therapeutic agent toxicity	3743	2	2.7078839329437506e-05	6.00223687584787e-05	0.12371773179166727
A9UF02_HUMAN	29221	Therapeutic response delayed	1263	1	0.05099562903203681	0.06192387189047201	0.18337085365793473
A9UF02_HUMAN	29221	Therapeutic response unexpected	15805	17	2.3969227171445447e-13	9.777123960479076e-13	0.24917901535199716
A9UF02_HUMAN	29221	Therapy cessation	6207	14	0.011196091483559958	0.016173578825460496	0.5231384211897934
A9UF02_HUMAN	29221	Thermal burn	3302	3	0.0007553041574926681	0.0013679904745575908	0.2104401491206247
A9UF02_HUMAN	29221	Thinking abnormal	9279	7	3.156525600892357e-10	1.0721271175287426e-09	0.17470859806020222
A9UF02_HUMAN	29221	Thirst	6518	10	0.00019157865323598237	0.0003803000090191665	0.35558392335020533
A9UF02_HUMAN	29221	Throat irritation	15974	16	4.4260132840116676e-14	1.876636767921966e-13	0.23202307789579005
A9UF02_HUMAN	29221	Throat tightness	11047	15	7.974078294369188e-08	2.267551662890914e-07	0.31464922586518346
A9UF02_HUMAN	29221	Thrombocytopenic purpura	803	1	0.2761821308520336	0.24947182255277495	0.28854615625475516
A9UF02_HUMAN	29221	Thrombophlebitis superficial	2313	3	0.024053473001003335	0.032000633764309866	0.3005376848263813
A9UF02_HUMAN	29221	Thrombosis	33862	93	3.6446327683334507e-06	8.892185862401601e-06	0.6373153960856751
A9UF02_HUMAN	29221	Thrombosis in device	2827	1	0.00013365166701857404	0.00027131233929169013	0.08188747958822137
A9UF02_HUMAN	29221	Thyroid disorder	5668	24	1.0	0.6330520235558572	0.9840425966675277
A9UF02_HUMAN	29221	Thyroid function test abnormal	2113	7	0.6173990184901148	0.45860510803385723	0.7691823937389342
A9UF02_HUMAN	29221	Thyroiditis	664	1	0.5415724876908702	0.41601625195384845	0.34904075010002056
A9UF02_HUMAN	29221	Tibia fracture	1978	4	0.16451299867487604	0.16541476070208752	0.46892404724683606
A9UF02_HUMAN	29221	Tic	2738	1	0.00019074247214923002	0.00037874246465047	0.08455024381304846
A9UF02_HUMAN	29221	Tinnitus	17613	41	1.8368773175654347e-05	4.153092040385322e-05	0.5399484811045332
A9UF02_HUMAN	29221	Toe amputation	1191	4	0.8244171789251885	0.5691429002807449	0.7798281965166424
A9UF02_HUMAN	29221	Tongue biting	1032	2	0.3407130348206167	0.29405063816977256	0.4493476064394439
A9UF02_HUMAN	29221	Tongue coated	754	3	1.0	0.6330520235558572	0.9244235045924645
A9UF02_HUMAN	29221	Tongue discolouration	2459	6	0.2137451300903232	0.20374015333911785	0.5660351014667272
A9UF02_HUMAN	29221	Tongue disorder	3962	10	0.08899465989666883	0.09980851667938288	0.5855617847072713
A9UF02_HUMAN	29221	Tongue oedema	1566	5	0.6970942255928667	0.5038433723388351	0.7412364423969047
A9UF02_HUMAN	29221	Tongue ulceration	1497	6	1.0	0.6330520235558572	0.9312435304479421
A9UF02_HUMAN	29221	Tonic clonic movements	530	1	0.7336646173966388	0.5221750205328612	0.43745560929359856
A9UF02_HUMAN	29221	Tonic convulsion	546	1	0.7361703190361936	0.5231382495896252	0.42461287580974977
A9UF02_HUMAN	29221	Tonsillar hypertrophy	598	1	0.5298953021000684	0.4108091573441135	0.38762816970906805
A9UF02_HUMAN	29221	Tonsillitis	1732	4	0.2681997683513988	0.2441395877850192	0.5356805956396149
A9UF02_HUMAN	29221	Tooth abscess	4453	9	0.015630977612418065	0.021819603570117287	0.46866025109064413
A9UF02_HUMAN	29221	Tooth discolouration	1596	2	0.07965906333119158	0.09057913179067889	0.2903563579878464
A9UF02_HUMAN	29221	Tooth disorder	8675	17	0.00028750410565265097	0.0005563400472025728	0.4543818773824591
A9UF02_HUMAN	29221	Tooth extraction	6320	17	0.0534696019713834	0.06443558346123623	0.6241533070565336
A9UF02_HUMAN	29221	Tooth fracture	4257	7	0.004612149184821928	0.007244987242249936	0.3811524991092224
A9UF02_HUMAN	29221	Tooth infection	4462	8	0.007903340954236705	0.011813884995761314	0.4156515802717802
A9UF02_HUMAN	29221	Tooth injury	723	1	0.3858973928139262	0.3231349634996712	0.3205180295239801
A9UF02_HUMAN	29221	Tooth loss	3766	12	0.38111591172122644	0.3207592554274305	0.7397358038880563
A9UF02_HUMAN	29221	Toothache	7274	28	0.653366844745102	0.4798109815713586	0.8942302628839057
A9UF02_HUMAN	29221	Torsade de pointes	3492	3	0.00039712456927208564	0.0007520492177276899	0.19898023844910884
A9UF02_HUMAN	29221	Torticollis	1003	1	0.14231944893697934	0.1471952116025413	0.23095211309013336
A9UF02_HUMAN	29221	Total lung capacity decreased	516	1	0.7318537767069346	0.5216315022298678	0.4493476064394439
A9UF02_HUMAN	29221	Toxic encephalopathy	1491	3	0.23223616287052956	0.21803504485764805	0.46656051878289034
A9UF02_HUMAN	29221	Toxic epidermal necrolysis	6180	13	0.006131240681173558	0.009383910192605326	0.4878193976183034
A9UF02_HUMAN	29221	Transient ischaemic attack	18520	44	1.7966822665105157e-05	4.066448348167152e-05	0.5511050423207295
A9UF02_HUMAN	29221	Transplant rejection	2628	8	0.4527421731547808	0.3653205194443924	0.7066076864620263
A9UF02_HUMAN	29221	Transposition of the great vessels	529	1	0.7335230722472941	0.5221441313698145	0.4382841237051394
A9UF02_HUMAN	29221	Treatment noncompliance	17957	61	0.06735833475914665	0.07869835961579404	0.7887938676964198
A9UF02_HUMAN	29221	Tremor	71348	94	2.427557128170377e-46	2.5495208540089483e-45	0.30528696813839895
A9UF02_HUMAN	29221	Trichorrhexis	1093	1	0.10138126413608134	0.1112919701712287	0.21191759827501247
A9UF02_HUMAN	29221	Trigeminal neuralgia	1751	2	0.04156476748603448	0.051763734641681845	0.26462437657668797
A9UF02_HUMAN	29221	Trigger finger	1245	3	0.5092234916990356	0.39891366172644366	0.5589710563195981
A9UF02_HUMAN	29221	Trismus	2293	7	0.5197041694587023	0.4052315627167639	0.7086168509248448
A9UF02_HUMAN	29221	Trisomy 21	699	2	0.775466602247866	0.5444031609785459	0.6640287440927221
A9UF02_HUMAN	29221	Tubulointerstitial nephritis	5255	17	0.29014598890964105	0.25911435421136947	0.7510573299689445
A9UF02_HUMAN	29221	Tunnel vision	723	3	1.0	0.6330520235558572	0.9642250721513067
A9UF02_HUMAN	29221	Tympanic membrane perforation	586	2	1.0	0.6330520235558572	0.7925137579325809
A9UF02_HUMAN	29221	Type 1 diabetes mellitus	2748	5	0.04081313184715945	0.05096446749577461	0.4218264989360438
A9UF02_HUMAN	29221	Type 2 diabetes mellitus	19197	20	3.0818390784193945e-16	1.4480180746804107e-15	0.241345379690581
A9UF02_HUMAN	29221	Type I hypersensitivity	553	1	0.7374028834340134	0.5236251761670405	0.4192282922396986
A9UF02_HUMAN	29221	Ulcer haemorrhage	3287	13	0.8938362339616884	0.6077675202791122	0.9188705635650815
A9UF02_HUMAN	29221	Umbilical hernia	1855	2	0.030521629704472697	0.03951163133002429	0.2497722798880881
A9UF02_HUMAN	29221	Underdose	17323	5	1.6267788590761724e-25	1.062781735067609e-24	0.06681314739470885
A9UF02_HUMAN	29221	Unevaluable event	30206	20	4.55267742795126e-33	3.6401650394735116e-32	0.15332539410078422
A9UF02_HUMAN	29221	Unintended pregnancy	5195	3	7.05733370993634e-07	1.8482654849227491e-06	0.13371380045241543
A9UF02_HUMAN	29221	Unresponsive to stimuli	11760	23	2.1095571203830763e-05	4.7357144733875324e-05	0.4534823547989446
A9UF02_HUMAN	29221	Upper gastrointestinal haemorrhage	5754	23	0.8399616344462666	0.5773200794840634	0.9287248993675122
A9UF02_HUMAN	29221	Upper limb fracture	8116	24	0.06191435769824709	0.07309836414866173	0.686349038011805
A9UF02_HUMAN	29221	Upper respiratory tract congestion	1376	1	0.03651643159604932	0.046235796162228386	0.16830110350277355
A9UF02_HUMAN	29221	Upper respiratory tract infection	16567	46	0.0019407164206313768	0.0032798893862091786	0.6443341684250606
A9UF02_HUMAN	29221	Urinary hesitation	1195	4	0.8244970815788232	0.569157881256823	0.7772091261673002
A9UF02_HUMAN	29221	Urinary incontinence	13019	32	0.0007649032484900528	0.0013839395736972415	0.5702047088721056
A9UF02_HUMAN	29221	Urinary retention	12827	30	0.00032451352315959726	0.0006230808196865755	0.5425037524020793
A9UF02_HUMAN	29221	Urinary tract infection	56606	163	4.750420618774371e-08	1.3763832690625767e-07	0.6682934079081395
A9UF02_HUMAN	29221	Urinary tract infection enterococcal	509	2	1.0	0.6330520235558572	0.9128758079538999
A9UF02_HUMAN	29221	Urine abnormality	1246	4	0.8263487494307582	0.5699056921749943	0.7452947417594642
A9UF02_HUMAN	29221	Urine flow decreased	1176	1	0.07188338989078485	0.0832631125167555	0.19694809984367118
A9UF02_HUMAN	29221	Urine ketone body present	590	1	0.5292758511700951	0.4107693572211385	0.3928930684487498
A9UF02_HUMAN	29221	Urine output increased	1237	3	0.5080867821997137	0.39822567713785856	0.5625948557122697
A9UF02_HUMAN	29221	Urosepsis	3365	10	0.2906254294457782	0.25946457448524857	0.6897586209130063
A9UF02_HUMAN	29221	Urticaria	57528	77	5.999970934857938e-37	5.23838266397137e-36	0.31015786206256024
A9UF02_HUMAN	29221	Uterine disorder	1450	5	0.8397742786482467	0.5772449290028628	0.800740544347106
A9UF02_HUMAN	29221	Uterine haemorrhage	1773	5	0.46516799099615985	0.3724008237814839	0.6544514064375385
A9UF02_HUMAN	29221	Uterine leiomyoma	3614	9	0.09851666855144432	0.10880241520518114	0.5777326368507136
A9UF02_HUMAN	29221	Uterine polyp	855	1	0.2840804071554152	0.25480224772065735	0.2709766010729667
A9UF02_HUMAN	29221	Uterine prolapse	544	2	1.0	0.6330520235558572	0.8539262631598289
A9UF02_HUMAN	29221	Uveitis	2928	10	0.5714378246484515	0.4332331421982699	0.7930569476227334
A9UF02_HUMAN	29221	Vaginal discharge	4638	2	8.486240623098361e-07	2.205421942182212e-06	0.09983348460582986
A9UF02_HUMAN	29221	Vaginal haemorrhage	18961	35	8.594273600869494e-09	2.639467101508548e-08	0.4279557543099956
A9UF02_HUMAN	29221	Vaginitis bacterial	950	2	0.45327599968326204	0.36556824122664816	0.488215226405725
A9UF02_HUMAN	29221	Varices oesophageal	1295	3	0.3921213871271808	0.32666431680218105	0.5373390494960842
A9UF02_HUMAN	29221	Varicose vein	2319	3	0.02417355782245892	0.03213753473661292	0.299759089787971
A9UF02_HUMAN	29221	Vascular graft	2282	9	1.0	0.6330520235558572	0.9162895538261429
A9UF02_HUMAN	29221	Vascular injury	816	1	0.2775516925058381	0.2503004731532965	0.28394357952921917
A9UF02_HUMAN	29221	Vascular pseudoaneurysm	736	1	0.3881152691319714	0.32442026941612756	0.3148490031514471
A9UF02_HUMAN	29221	Vascular purpura	554	1	0.7375854107832455	0.5237088380701548	0.41847019406204994
A9UF02_HUMAN	29221	Vascular rupture	699	3	1.0	0.6330520235558572	0.9974742125703173
A9UF02_HUMAN	29221	Vein disorder	2308	2	0.006017321037841484	0.009228057157156837	0.20070599940703696
A9UF02_HUMAN	29221	Vena cava thrombosis	901	2	0.6031192208194576	0.4503724616468345	0.5148254000362927
A9UF02_HUMAN	29221	Venous insufficiency	952	4	1.0	0.6330520235558572	0.97643045281145
A9UF02_HUMAN	29221	Venous occlusion	974	3	0.8050828670297383	0.5589133442058941	0.7149763665797537
A9UF02_HUMAN	29221	Venous thrombosis limb	1078	4	1.0	0.6330520235558572	0.8618771594648551
A9UF02_HUMAN	29221	Ventricular arrhythmia	1343	3	0.39723168691305855	0.3296573654182764	0.5180910835439857
A9UF02_HUMAN	29221	Ventricular fibrillation	5822	17	0.1312601595877324	0.1380665409226005	0.6776982419254662
A9UF02_HUMAN	29221	Ventricular septal defect	3221	4	0.004196918361025323	0.006656060173821011	0.2877389086929607
A9UF02_HUMAN	29221	Ventricular tachycardia	7853	18	0.004263087759515144	0.0067514209767570565	0.5316467532474339
A9UF02_HUMAN	29221	Vertigo	22504	66	0.0010771877009248202	0.0019024917819663106	0.6806901302645822
A9UF02_HUMAN	29221	Violence-related symptom	941	1	0.2029464858350658	0.1956733783749607	0.24618512480458896
A9UF02_HUMAN	29221	Viral infection	12101	52	1.0	0.6330520235558572	0.9987159847662302
A9UF02_HUMAN	29221	Viral upper respiratory tract infection	722	1	0.38574524679950856	0.32304705468540307	0.32096257602817424
A9UF02_HUMAN	29221	Vision blurred	53458	144	1.171953997927558e-09	3.830249753643655e-09	0.6250444253582392
A9UF02_HUMAN	29221	Visual field defect	3836	16	1.0	0.6330520235558572	0.9692733709583817
A9UF02_HUMAN	29221	Visual impairment	40156	108	1.5032938392891338e-07	4.177651941471607e-07	0.62406896399725
A9UF02_HUMAN	29221	Vitamin D decreased	3362	10	0.2905572370393564	0.25941648751444046	0.6903759466477136
A9UF02_HUMAN	29221	Vitamin D deficiency	3780	6	0.005994353234352236	0.009196743615988533	0.3679078176729946
A9UF02_HUMAN	29221	Vocal cord disorder	938	1	0.20248656945032772	0.19532776381614914	0.24697333758411272
A9UF02_HUMAN	29221	Volvulus	730	3	1.0	0.6330520235558572	0.9549409242763973
A9UF02_HUMAN	29221	Vomiting projectile	981	3	0.80537409559607	0.5590119045608367	0.7098589488230479
A9UF02_HUMAN	29221	Vulvovaginal discomfort	1608	1	0.01925617778271952	0.026251656052811753	0.14400374444076766
A9UF02_HUMAN	29221	Vulvovaginal mycotic infection	2102	2	0.011407368826310754	0.016446746959296234	0.22039430220601297
A9UF02_HUMAN	29221	Vulvovaginal pain	1509	1	0.026901640720387088	0.035322842916213286	0.1534575711646642
A9UF02_HUMAN	29221	Walking aid user	2725	4	0.01809987910123459	0.02486229243792626	0.3401896616189837
A9UF02_HUMAN	29221	Weight bearing difficulty	1081	3	0.6397971937021667	0.47168849893058484	0.64400932462796
A9UF02_HUMAN	29221	Weight decreased	99424	383	0.028032606892817155	0.03665505084182872	0.8948977557995993
A9UF02_HUMAN	29221	Weight increased	80879	340	0.6852565653316279	0.49727461391499017	0.9769275243986967
A9UF02_HUMAN	29221	Wheelchair user	1864	2	0.030759894601527185	0.03978085853708364	0.24856500248798455
A9UF02_HUMAN	29221	Wheezing	16488	50	0.010359940631659001	0.015073697850833933	0.7038995538274535
A9UF02_HUMAN	29221	White blood cells urine positive	711	3	1.0	0.6330520235558572	0.9805678699843797
A9UF02_HUMAN	29221	Withdrawal syndrome	10661	5	3.9540723817234115e-14	1.680708650843548e-13	0.10858390452154355
A9UF02_HUMAN	29221	Wound	6570	28	1.0	0.6330520235558572	0.9904604837751118
A9UF02_HUMAN	29221	Wound dehiscence	1854	3	0.07588177533676757	0.08701310412244363	0.37506323714151313
A9UF02_HUMAN	29221	Wound haemorrhage	1254	1	0.05090096865928618	0.06182699627522266	0.184687962742469
A9UF02_HUMAN	29221	Wound infection	3315	12	0.6892617097623608	0.4995200832137194	0.84074120732539
A9UF02_HUMAN	29221	Wrist fracture	4937	11	0.021841669130895656	0.02939089172775694	0.5167588693624543
A9UF02_HUMAN	29221	Wrong drug administered	9386	5	4.695843771488865e-12	1.7815965234030275e-11	0.12334187043828676
A9UF02_HUMAN	29221	Wrong technique in drug usage process	37400	23	3.6718055079943635e-42	3.563623620135804e-41	0.14240100592009022
A9UF02_HUMAN	29221	Yawning	993	1	0.14170118207722246	0.14674482884341286	0.2332802593914452
KCNK1_HUMAN	1423	Abdominal pain upper	74481	14	0.7989495482469751	0.5559005066305429	0.8970686133842946
KCNK1_HUMAN	1423	Abortion induced	5978	1	1.0	0.6330520235558572	0.7983222404083303
KCNK1_HUMAN	1423	Abortion spontaneous	17913	2	0.5991348183031351	0.44830423497396327	0.5328091151717481
KCNK1_HUMAN	1423	Abscess	6343	1	1.0	0.6330520235558572	0.7523765422454415
KCNK1_HUMAN	1423	Accidental exposure	7071	1	1.0	0.6330520235558572	0.6749041062122476
KCNK1_HUMAN	1423	Acne	11468	1	0.738669108544864	0.5241964215990024	0.4161133714939034
KCNK1_HUMAN	1423	Acute hepatic failure	4809	1	1.0	0.6330520235558572	0.9924234673295736
KCNK1_HUMAN	1423	Altered state of consciousness	7348	1	1.0	0.6330520235558572	0.6494585587206466
KCNK1_HUMAN	1423	Amenorrhoea	8729	1	1.0	0.6330520235558572	0.5466970704537798
KCNK1_HUMAN	1423	Anaphylactic shock	9422	1	1.0	0.6330520235558572	0.50648254229069
KCNK1_HUMAN	1423	Angioedema	18895	2	0.451987777848197	0.36505468735831315	0.5051153369947166
KCNK1_HUMAN	1423	Ankle fracture	6288	1	1.0	0.6330520235558572	0.7589584906824544
KCNK1_HUMAN	1423	Anosmia	7019	1	1.0	0.6330520235558572	0.6799048205928455
KCNK1_HUMAN	1423	Application site erythema	13868	2	1.0	0.6330520235558572	0.6882405929497463
KCNK1_HUMAN	1423	Application site irritation	6048	1	1.0	0.6330520235558572	0.7890808716587713
KCNK1_HUMAN	1423	Application site pruritus	10025	1	0.7297748226731045	0.5213675389805797	0.47601476764969974
KCNK1_HUMAN	1423	Arthralgia	132818	27	1.0	0.6330520235558572	0.970189582387782
KCNK1_HUMAN	1423	Arthropathy	18202	1	0.19776135590424296	0.1919869412974387	0.2621598830240421
KCNK1_HUMAN	1423	Bacterial infection	6888	1	1.0	0.6330520235558572	0.6928375244548555
KCNK1_HUMAN	1423	Bladder cancer	10861	2	1.0	0.6330520235558572	0.8788234701023281
KCNK1_HUMAN	1423	Blindness	14544	2	0.775781890263388	0.5444031609785459	0.656247012917149
KCNK1_HUMAN	1423	Blindness unilateral	5855	1	1.0	0.6330520235558572	0.8150960080151333
KCNK1_HUMAN	1423	Blister	18906	3	1.0	0.6330520235558572	0.7572721839264546
KCNK1_HUMAN	1423	Blood alkaline phosphatase increased	15112	1	0.38853338513679025	0.3246578693498085	0.31576811798825954
KCNK1_HUMAN	1423	Blood bilirubin increased	14575	1	0.3845752028594733	0.3223857119358101	0.327403048642829
KCNK1_HUMAN	1423	Blood lactate dehydrogenase increased	9536	1	1.0	0.6330520235558572	0.5004270614494589
KCNK1_HUMAN	1423	Blood pressure fluctuation	6201	1	1.0	0.6330520235558572	0.7696083920839661
KCNK1_HUMAN	1423	Blood triglycerides increased	10079	1	0.729929341121297	0.5213675389805797	0.47346418246880234
KCNK1_HUMAN	1423	Body height decreased	5053	1	1.0	0.6330520235558572	0.9444916925812729
KCNK1_HUMAN	1423	Bone disorder	10572	1	0.7320295195268745	0.5216724843691471	0.4513832211636165
KCNK1_HUMAN	1423	Bone marrow failure	9688	1	0.7291712519802789	0.5213675389805797	0.49257479414892025
KCNK1_HUMAN	1423	Bone pain	22621	2	0.3484067641713644	0.29870237001736216	0.42190830990942046
KCNK1_HUMAN	1423	Brain oedema	5564	1	1.0	0.6330520235558572	0.8577336025383049
KCNK1_HUMAN	1423	Breast cancer	29038	3	0.3043781453490225	0.26886322995480105	0.4930158805841836
KCNK1_HUMAN	1423	Breast cancer female	15077	1	0.38822043936081796	0.3244854375788782	0.3165011960016311
KCNK1_HUMAN	1423	Breast cancer metastatic	4884	1	1.0	0.6330520235558572	0.9771804282040939
KCNK1_HUMAN	1423	Burning sensation	28967	5	0.8390850570314118	0.5770583711264177	0.8237642481390425
KCNK1_HUMAN	1423	C-reactive protein increased	12040	2	1.0	0.6330520235558572	0.7927516250075743
KCNK1_HUMAN	1423	Cataract	19101	4	1.0	0.6330520235558572	0.9994390806766698
KCNK1_HUMAN	1423	Cerebral haemorrhage	15194	1	0.3892956026456113	0.3251093710784118	0.3140638472270513
KCNK1_HUMAN	1423	Cerebral infarction	11214	2	1.0	0.6330520235558572	0.8511544828613254
KCNK1_HUMAN	1423	Cholelithiasis	17633	2	0.5976008890274315	0.44757893110285263	0.5412707198594056
KCNK1_HUMAN	1423	Chromaturia	10041	2	1.0	0.6330520235558572	0.9506070387330591
KCNK1_HUMAN	1423	Colitis	10610	2	1.0	0.6330520235558572	0.8996176528884974
KCNK1_HUMAN	1423	Colitis ulcerative	9321	1	1.0	0.6330520235558572	0.511971247952853
KCNK1_HUMAN	1423	Completed suicide	40294	4	0.16316707083206788	0.164308516402062	0.4737227134197657
KCNK1_HUMAN	1423	Crohn's disease	19179	1	0.20219812365259435	0.19510863871556527	0.24880446505999532
KCNK1_HUMAN	1423	Cyanosis	8112	1	1.0	0.6330520235558572	0.5882840624979152
KCNK1_HUMAN	1423	Cystitis	12614	2	1.0	0.6330520235558572	0.7566717461022187
KCNK1_HUMAN	1423	Deafness	8932	1	1.0	0.6330520235558572	0.534270745820243
KCNK1_HUMAN	1423	Death	288756	38	0.001982958353870596	0.003345969566234379	0.6280167401235199
KCNK1_HUMAN	1423	Device dislocation	16242	1	0.27572465105226146	0.24921726839195205	0.29379792075122163
KCNK1_HUMAN	1423	Drug abuse	24192	3	0.5026524664268258	0.3952317725231634	0.591786187637429
KCNK1_HUMAN	1423	Drug abuser	6070	1	1.0	0.6330520235558572	0.7862204697512919
KCNK1_HUMAN	1423	Drug administered at inappropriate site	8357	1	1.0	0.6330520235558572	0.5710354273480841
KCNK1_HUMAN	1423	Drug administration error	24747	2	0.26246015192503647	0.2400754595466054	0.38565948926414145
KCNK1_HUMAN	1423	Drug dose omission	91815	18	0.9083904215347967	0.6164222590097022	0.9356329352437511
[truncated: 593,625 more rows]
