# Supplementary material for: In Silico Profiling of Clinical Phenotypes for Human Targets Using Adverse Event Data
Source: High Throughput. 2018 Nov 23;7(4):37. doi: 10.3390/ht7040037 (PMC6306940; doi:10.3390/ht7040037)
Supplement: Supplementary file 1 [file high-throughput-07-00037-s001.zip › high-throughput-385126-suppl-final/Supplementary_File_4.txt]

SWISSPROT_ID	TARGET_CASE_COUNT	REACTION_NAME	REACTION_CASE_COUNT	NUM_CASES_TARGET_AND_REACTION	P-value Fisher Exact Test (two tailed)	Q-Value (Based on Fisher Exact Test)	PRR
GBRR3_HUMAN	111320	Abasia	22742	528	1.910342012230216e-14	8.246327483459652e-14	1.4263091573131073
GBRR3_HUMAN	111320	Abdominal abscess	1676	38	0.05321851465622453	0.06418595396746121	1.3921185314465947
GBRR3_HUMAN	111320	Abdominal discomfort	52559	888	0.3607380404261502	0.3070092706119963	1.0312705473621342
GBRR3_HUMAN	111320	Abdominal distension	38929	841	8.666256619364804e-15	3.804248040931483e-14	1.3249953155176017
GBRR3_HUMAN	111320	Abdominal pain	91875	2105	1.442825130389878e-49	1.6012451887204463e-48	1.4071078649069682
GBRR3_HUMAN	111320	Abdominal pain upper	74481	1517	1.1162587180486174e-16	5.344855900388829e-16	1.2476232563105905
GBRR3_HUMAN	111320	Abdominal rigidity	1085	34	0.0004466148405380309	0.0008391181771186688	1.9412555774781852
GBRR3_HUMAN	111320	Abnormal dreams	16717	456	3.197848863386106e-24	2.0097609775273947e-23	1.6827674715032448
GBRR3_HUMAN	111320	Abnormal faeces	2564	51	0.16108874019245797	0.16262386090541692	1.2178230871047986
GBRR3_HUMAN	111320	Abnormal loss of weight	2334	56	0.006861780744980066	0.010392071064725525	1.4751657577345458
GBRR3_HUMAN	111320	Abnormal sensation in eye	2403	43	0.5206947327176223	0.4058504363718249	1.093359463023076
GBRR3_HUMAN	111320	Abortion	1424	25	0.6762805420563036	0.49223413915795616	1.0723308728553864
GBRR3_HUMAN	111320	Abortion missed	784	16	0.39548000848228587	0.3285599349647155	1.250159075937238
GBRR3_HUMAN	111320	Abscess	6343	186	2.2457244275034303e-13	9.175111658720315e-13	1.8128017264849214
GBRR3_HUMAN	111320	Abscess intestinal	914	15	0.8966952256918186	0.6094678636443548	1.0012397493601906
GBRR3_HUMAN	111320	Abscess limb	1279	37	0.0012452420712255935	0.0021739987970862784	1.7876670844319926
GBRR3_HUMAN	111320	Abscess oral	586	12	0.4129340856679515	0.339803503457835	1.2545150309056605
GBRR3_HUMAN	111320	Activities of daily living impaired	18898	516	2.742328883912934e-27	1.8868980071914957e-26	1.6844706774460618
GBRR3_HUMAN	111320	Acute coronary syndrome	4446	116	2.6857886956494985e-06	6.641702298828964e-06	1.6075948579257597
GBRR3_HUMAN	111320	Acute graft versus host disease in intestine	682	15	0.22743015556078583	0.21438321656839274	1.3494970534854742
GBRR3_HUMAN	111320	Acute hepatic failure	4809	150	4.773788980637379e-13	1.9162856249402362e-12	1.9319908449770582
GBRR3_HUMAN	111320	Acute leukaemia	959	17	0.7019863766156467	0.5065435949895867	1.082940346034805
GBRR3_HUMAN	111320	Acute myocardial infarction	16701	396	2.4404437695616597e-12	9.421955382485545e-12	1.4574071582591241
GBRR3_HUMAN	111320	Adenocarcinoma	963	26	0.015013380519143454	0.021043548231791158	1.6650998151223833
GBRR3_HUMAN	111320	Adenocarcinoma pancreas	667	15	0.2189866906517703	0.20779092769161853	1.3805437648386676
GBRR3_HUMAN	111320	Adenovirus infection	590	12	0.41537712555311224	0.3414664972050323	1.245833265985898
GBRR3_HUMAN	111320	Alanine aminotransferase abnormal	619	12	0.5242346861455485	0.4080192275991127	1.186312401548351
GBRR3_HUMAN	111320	Alveolitis allergic	756	16	0.31248871666832456	0.27442869182325524	1.2974623923240525
GBRR3_HUMAN	111320	Amyloidosis	658	11	0.8776253418691441	0.5984327019433304	1.0202225534696472
GBRR3_HUMAN	111320	Amyotrophic lateral sclerosis	851	15	0.6863825331216395	0.4979152713610305	1.07669202712298
GBRR3_HUMAN	111320	Anaemia	81132	2328	1.2712697644619332e-139	3.567457287818285e-138	1.7727244274596559
GBRR3_HUMAN	111320	Anaemia postoperative	1092	32	0.0025613443948435573	0.004232736818782669	1.8115512647543375
GBRR3_HUMAN	111320	Anal abscess	1475	27	0.5375285765604939	0.4141674016480205	1.1189269077449313
GBRR3_HUMAN	111320	Anal fissure	1336	28	0.1942812414054585	0.18938685677135667	1.2845671238988132
GBRR3_HUMAN	111320	Anal haemorrhage	1048	30	0.004627248964363346	0.007266432248844017	1.7683979070232048
GBRR3_HUMAN	111320	Anaphylactic reaction	17883	532	8.630474962747514e-37	7.505258305142394e-36	1.8398975369219819
GBRR3_HUMAN	111320	Anaphylactoid reaction	2208	64	2.319868665393282e-05	5.1818034515551866e-05	1.7912727058205202
GBRR3_HUMAN	111320	Aneurysm	2327	53	0.021703992296112876	0.029226539592032617	1.398594850125037
GBRR3_HUMAN	111320	Anger	16280	523	1.3494461163396297e-44	1.3732544310642924e-43	1.9917492823715444
GBRR3_HUMAN	111320	Angina pectoris	15254	435	9.416987580354171e-27	6.375676779242273e-26	1.7614765844908247
GBRR3_HUMAN	111320	Angina unstable	4590	142	4.003917385336452e-12	1.5255150128200176e-11	1.9157113897455518
GBRR3_HUMAN	111320	Angiopathy	3584	91	7.324794373584799e-05	0.0001539204598806796	1.5633251771239207
GBRR3_HUMAN	111320	Angioplasty	973	19	0.44632459734922114	0.36162885154355656	1.1951206260532088
GBRR3_HUMAN	111320	Angle closure glaucoma	1196	24	0.3041567873123098	0.26871218670651337	1.2288253033103227
GBRR3_HUMAN	111320	Animal bite	942	17	0.608818154426018	0.4536495890414118	1.1028430334754447
GBRR3_HUMAN	111320	Ankle fracture	6288	174	1.1215355198733664e-10	3.916727362048837e-10	1.7077737327817815
GBRR3_HUMAN	111320	Ankylosing spondylitis	2087	35	0.8629025269717641	0.590052541981556	1.0235220504749318
GBRR3_HUMAN	111320	Anorectal disorder	1010	25	0.04586416017464917	0.056390971529846304	1.523036437690036
GBRR3_HUMAN	111320	Anorgasmia	1158	22	0.4855574271534244	0.38501166200430176	1.1621197043923621
GBRR3_HUMAN	111320	Antinuclear antibody positive	2216	59	0.0004106704340028826	0.0007757278321721097	1.6413771455977086
GBRR3_HUMAN	111320	Antiphospholipid syndrome	588	14	0.14459673361407752	0.14896776569450307	1.4636008693899372
GBRR3_HUMAN	111320	Aortic aneurysm rupture	515	15	0.034313300133146506	0.04378213751830547	1.8002290693496226
GBRR3_HUMAN	111320	Aortic dissection	957	22	0.1239277987700245	0.1314553729955018	1.4119443681173511
GBRR3_HUMAN	111320	Aortic valve replacement	582	11	0.621505241751009	0.4609631759293653	1.1560139966635055
GBRR3_HUMAN	111320	Aphagia	5268	130	1.00911752231164e-05	2.3477573298730783e-05	1.5182936227809198
GBRR3_HUMAN	111320	Aphonia	4520	98	0.006924588370354382	0.01047709662236153	1.3298842815940224
GBRR3_HUMAN	111320	Aphthous stomatitis	2972	63	0.04282692066460736	0.053090942632150195	1.2995809713421134
GBRR3_HUMAN	111320	Aplasia	931	17	0.6049417896633613	0.4513630084065724	1.116115761449438
GBRR3_HUMAN	111320	Aplastic anaemia	2182	39	0.5547866548395226	0.4234625349258837	1.092066164327816
GBRR3_HUMAN	111320	Apparent death	1865	37	0.2350530494216152	0.2200184673091403	1.2145965639302707
GBRR3_HUMAN	111320	Appendicectomy	1658	35	0.1452152219845606	0.1494652065321625	1.2940648475505607
GBRR3_HUMAN	111320	Appendicitis	3209	57	0.5309434306280115	0.4111101864670366	1.0851634618541508
GBRR3_HUMAN	111320	Appendicitis perforated	1061	25	0.06930943399837577	0.08068713592429842	1.4480607057188084
GBRR3_HUMAN	111320	Appendix disorder	645	11	0.875910349581672	0.5973962927579394	1.0411419433672897
GBRR3_HUMAN	111320	Appetite disorder	1826	52	0.00019884375037402033	0.00039374573560629157	1.758961135027816
GBRR3_HUMAN	111320	Application site dermatitis	734	14	0.5583967492489368	0.425536902263829	1.166815137541422
GBRR3_HUMAN	111320	Application site erosion	771	19	0.08585469243022348	0.09672414547555035	1.5161503686898419
GBRR3_HUMAN	111320	Arterial occlusive disease	4263	89	0.025325313291356857	0.03349992426645981	1.2795111577393101
GBRR3_HUMAN	111320	Arterial thrombosis	1081	18	0.904390620431685	0.6140247737787703	1.0161217700938605
GBRR3_HUMAN	111320	Arthralgia	132818	2433	4.0177776750137367e-08	1.1709081085006125e-07	1.1197497988591816
GBRR3_HUMAN	111320	Arthritis	28086	591	3.299890541489566e-09	1.0449919208716009e-08	1.2898531611633957
GBRR3_HUMAN	111320	Arthritis bacterial	1605	44	0.0015038663591478317	0.002591574380051807	1.6914388010118173
GBRR3_HUMAN	111320	Arthritis infective	1591	29	0.5524868053046033	0.42210085966036426	1.1140982290042478
GBRR3_HUMAN	111320	Arthropathy	18202	396	5.1703003567099134e-08	1.4937823253171085e-07	1.3345514835120196
GBRR3_HUMAN	111320	Arthropod bite	2803	61	0.030524976730670717	0.03951543478559034	1.3349619891846216
GBRR3_HUMAN	111320	Arthropod sting	580	11	0.6208069653039061	0.46056513116723885	1.1600773147537111
GBRR3_HUMAN	111320	Ascites	12351	348	5.917598295414083e-21	3.339905783403274e-20	1.7397864870828645
GBRR3_HUMAN	111320	Aspergillosis	1496	35	0.04072974717680925	0.0508802731533089	1.437554584239945
GBRR3_HUMAN	111320	Asthenia	144412	3720	1.4757539159639787e-151	4.4788899596914504e-150	1.5866460395712136
GBRR3_HUMAN	111320	Asthenopia	1656	36	0.09850179419078242	0.10879013604845708	1.333503014333054
GBRR3_HUMAN	111320	Asthma	29308	631	2.987327149907452e-11	1.0811737579377896e-10	1.3203897929346537
GBRR3_HUMAN	111320	Atrial fibrillation	37254	1145	6.480382877063333e-85	1.1420974401239806e-83	1.9028148886291671
GBRR3_HUMAN	111320	Atrial septal defect	4691	133	4.770166540499756e-09	1.493049850673374e-08	1.7509906846826078
GBRR3_HUMAN	111320	Attention deficit/hyperactivity disorder	2231	71	2.7127411471080725e-07	7.372099463958134e-07	1.9724732087009758
GBRR3_HUMAN	111320	Aura	797	16	0.40007534952204005	0.3314934134876684	1.229349769935722
GBRR3_HUMAN	111320	Auricular swelling	1000	23	0.10415865613997621	0.1136664813821468	1.412666959912703
GBRR3_HUMAN	111320	Autism	956	25	0.028781479266597684	0.037538058069630696	1.61137582290514
GBRR3_HUMAN	111320	Autoimmune disorder	1939	45	0.024678363119128528	0.032731897505539224	1.425735799379321
GBRR3_HUMAN	111320	Autoimmune thyroiditis	1140	34	0.0010072590992899805	0.0017880295396684278	1.8447193597916571
GBRR3_HUMAN	111320	B-cell lymphoma	1511	28	0.47788117045129075	0.3801434449330208	1.1329830061090005
GBRR3_HUMAN	111320	BK virus infection	573	12	0.4063243396376922	0.33544060620030447	1.283585789197592
GBRR3_HUMAN	111320	Back disorder	6467	177	2.0020230619966772e-10	6.885544484533897e-10	1.6886091429511565
GBRR3_HUMAN	111320	Back pain	89475	2344	5.660915920692756e-102	1.1750778678391954e-100	1.6143266799629354
GBRR3_HUMAN	111320	Bacteraemia	3883	112	2.919256369912347e-08	8.5996073450484e-08	1.7822474654570646
GBRR3_HUMAN	111320	Bacterial infection	6888	182	1.3711434418176304e-09	4.462148303801946e-09	1.6285997147908906
GBRR3_HUMAN	111320	Bacterial sepsis	1421	34	0.03550359015615775	0.04513316535617535	1.4709874635397062
GBRR3_HUMAN	111320	Basal cell carcinoma	5070	115	0.0007242514939174117	0.0013159122492477414	1.392710009924027
GBRR3_HUMAN	111320	Basedow's disease	1021	27	0.018112617939173733	0.02487729628492592	1.6299860788879885
GBRR3_HUMAN	111320	Benign breast neoplasm	548	14	0.09205426962742821	0.10274309096667997	1.5732338933142769
GBRR3_HUMAN	111320	Beta haemolytic streptococcal infection	597	18	0.01422498968323126	0.020035788901422012	1.8655223516576402
GBRR3_HUMAN	111320	Bile duct cancer	853	18	0.27801168411385	0.2506032641237057	1.2935777743829626
GBRR3_HUMAN	111320	Bile duct obstruction	1239	26	0.21619959461083194	0.2056273027603827	1.2862312669164657
GBRR3_HUMAN	111320	Bile duct stenosis	537	14	0.08630514467476871	0.09717158416041058	1.6063229426956478
GBRR3_HUMAN	111320	Bile duct stone	1428	38	0.004581049489446366	0.007200664395107829	1.6404965140356276
GBRR3_HUMAN	111320	Biliary colic	1133	24	0.19717033796339034	0.1916126400749826	1.2986323313613148
GBRR3_HUMAN	111320	Biliary dyskinesia	1661	35	0.1456252726712977	0.14976834604928313	1.2916772740310947
GBRR3_HUMAN	111320	Biliary tract disorder	759	22	0.013714300034353082	0.01938265383036496	1.79127270582052
GBRR3_HUMAN	111320	Bilirubin conjugated increased	1330	42	8.352754589391361e-05	0.0001742559478672553	1.9567707275539377
GBRR3_HUMAN	111320	Bladder disorder	4327	134	1.2670194017289114e-11	4.6880788648895906e-11	1.917725536949276
GBRR3_HUMAN	111320	Bladder operation	508	11	0.37720574214589353	0.3181365645805173	1.3281368050198423
GBRR3_HUMAN	111320	Bladder pain	1203	32	0.008607344758724747	0.012762872161279635	1.6398329125871884
GBRR3_HUMAN	111320	Blepharitis	1130	34	0.000916924305200169	0.00163764884462256	1.8615507408116538
GBRR3_HUMAN	111320	Blindness	14544	260	0.15972281170836367	0.16148372166158187	1.0922700411437085
GBRR3_HUMAN	111320	Blindness transient	2945	78	6.032919928428172e-05	0.00012810923400805518	1.6325760656815553
GBRR3_HUMAN	111320	Blister	18906	466	7.01647312603258e-17	3.38886266607709e-16	1.5164619420045629
GBRR3_HUMAN	111320	Blood bilirubin increased	14575	420	1.0819171862591404e-26	7.312655463978475e-26	1.7805162112959885
GBRR3_HUMAN	111320	Blood blister	1304	41	0.0001118751692125935	0.00022943038223062254	1.9479913392276205
GBRR3_HUMAN	111320	Blood calcium increased	4248	78	0.30393546194981047	0.2685749341028432	1.1224449832875347
GBRR3_HUMAN	111320	Blood cholesterol abnormal	1831	43	0.021051073751815516	0.028446245583461663	1.4431366514174828
GBRR3_HUMAN	111320	Blood cortisol decreased	645	12	0.6394566841227318	0.47152353114628187	1.1375855098575816
GBRR3_HUMAN	111320	Blood creatinine abnormal	1019	25	0.04741479741671595	0.058073324045671074	1.5092463693407299
GBRR3_HUMAN	111320	Blood creatinine increased	29840	956	9.818951386238248e-80	1.641341798367848e-78	1.9861272564952215
GBRR3_HUMAN	111320	Blood disorder	3432	59	0.6864667199798739	0.4979642267602564	1.0496443827614166
GBRR3_HUMAN	111320	Blood immunoglobulin E increased	741	14	0.5608706032750818	0.42702634322248817	1.1555803287893038
GBRR3_HUMAN	111320	Blood iron decreased	2913	72	0.000964648690740935	0.001717005082095376	1.5207848526712757
GBRR3_HUMAN	111320	Blood iron increased	772	13	0.8867254144653518	0.6036645468181578	1.0277987659879269
GBRR3_HUMAN	111320	Blood parathyroid hormone increased	1271	22	0.7402100200626753	0.5248894227758975	1.0569799713288417
GBRR3_HUMAN	111320	Blood potassium abnormal	866	19	0.18154188182871717	0.17934120798246914	1.346098084126046
GBRR3_HUMAN	111320	Blood pressure abnormal	5282	118	0.0011174172004318867	0.0019674823910491405	1.3712046874726018
GBRR3_HUMAN	111320	Blood pressure diastolic increased	1165	36	0.0004465487123587	0.0008390017076821926	1.9134409948800242
GBRR3_HUMAN	111320	Blood pressure inadequately controlled	4106	77	0.24214429870441467	0.2251908667425311	1.1468324508970045
GBRR3_HUMAN	111320	Blood pressure increased	56300	1458	5.688863803645045e-61	7.518688737693872e-60	1.5953308189050666
GBRR3_HUMAN	111320	Blood thyroid stimulating hormone increased	2804	63	0.013978585502480913	0.019716488136487246	1.3792342377359386
GBRR3_HUMAN	111320	Blood uric acid increased	2340	59	0.0018581924693136754	0.003150736813522202	1.552148401163638
GBRR3_HUMAN	111320	Blood urine present	7984	173	0.00034859242507561425	0.0006661501345167381	1.3290642640613015
GBRR3_HUMAN	111320	Body height decreased	5053	117	0.00030691330991691355	0.0005912718409217866	1.4223852047130328
GBRR3_HUMAN	111320	Body temperature fluctuation	588	17	0.032026830193449034	0.04118423153056127	1.7865670857526905
GBRR3_HUMAN	111320	Body temperature increased	9141	290	1.0935524693292418e-24	6.96885058864246e-24	1.9661297409384648
GBRR3_HUMAN	111320	Bone density decreased	6207	149	8.132528221791193e-06	1.911179772216493e-05	1.4759223689506646
GBRR3_HUMAN	111320	Bone graft	660	12	0.6452058940918762	0.47476797262452564	1.1112525119442116
GBRR3_HUMAN	111320	Bone marrow disorder	1259	27	0.1493251896885261	0.15274017465379294	1.3151024045573543
GBRR3_HUMAN	111320	Bone marrow failure	9688	227	2.751881396016977e-07	7.474238650585303e-07	1.439777327070304
GBRR3_HUMAN	111320	Bone marrow toxicity	642	18	0.028023856418839865	0.03664472973238007	1.7309894897592528
GBRR3_HUMAN	111320	Bone pain	22621	478	7.304301921326384e-08	2.083771502365901e-07	1.2953822805538542
GBRR3_HUMAN	111320	Bowel movement irregularity	1721	43	0.007616105728581461	0.011426767509408435	1.5377403651576038
GBRR3_HUMAN	111320	Brain abscess	804	18	0.2078153028079317	0.1993505041266703	1.3742206636256662
GBRR3_HUMAN	111320	Brain neoplasm	3290	67	0.0741058171079281	0.08532078308279539	1.2474438685119944
GBRR3_HUMAN	111320	Brain neoplasm malignant	807	18	0.20862517997050162	0.19995521219968915	1.3689954899997132
GBRR3_HUMAN	111320	Breakthrough pain	1423	34	0.035645164476682756	0.04529039581773388	1.4688694110364093
GBRR3_HUMAN	111320	Breast cyst	876	21	0.08245891225945894	0.09335848527602908	1.4738717526839016
GBRR3_HUMAN	111320	Breast discharge	948	19	0.36835336988154155	0.3122674128060033	1.2272821068404316
GBRR3_HUMAN	111320	Breast discomfort	508	9	0.726289613520156	0.5203087583641739	1.082302045701176
GBRR3_HUMAN	111320	Breast disorder	980	19	0.4483398841002455	0.3629489978415314	1.1864152728977742
GBRR3_HUMAN	111320	Breast enlargement	2022	36	0.5985591739217235	0.44804704781661825	1.0877517035345154
GBRR3_HUMAN	111320	Breast mass	3177	101	1.158190974340101e-09	3.7868801689190625e-09	1.970341742569483
GBRR3_HUMAN	111320	Breast swelling	1349	32	0.04076273495390876	0.0509125549524787	1.458044298131813
GBRR3_HUMAN	111320	Breath odour	1212	29	0.05283742494410697	0.06379646019246603	1.4710240352532842
GBRR3_HUMAN	111320	Breech presentation	656	15	0.2143080299321921	0.2041624843921571	1.4042348434864451
GBRR3_HUMAN	111320	Bronchial disorder	626	20	0.006329273119094269	0.009660223059581217	1.9804500212867138
GBRR3_HUMAN	111320	Bronchitis	31471	904	3.6664957912727616e-55	4.448066636165723e-54	1.774688475253333
GBRR3_HUMAN	111320	Bronchopulmonary aspergillosis	2306	52	0.02621650349796533	0.03452203963247139	1.3843820113306768
GBRR3_HUMAN	111320	Bunion	783	19	0.089454680154014	0.10023795487288373	1.492336488553352
GBRR3_HUMAN	111320	Burning sensation	28967	567	3.2789161497058904e-05	7.194697768638932e-05	1.1980397679826715
GBRR3_HUMAN	111320	Burns second degree	848	15	0.685356873024041	0.4973303164961896	1.0805696694775644
GBRR3_HUMAN	111320	Caesarean section	8370	219	8.354660969841184e-11	2.9407882550563433e-10	1.6122772918969754
GBRR3_HUMAN	111320	Calcinosis	1239	34	0.004738791974534723	0.007425568216111683	1.693161503675994
GBRR3_HUMAN	111320	Calculus bladder	503	13	0.10945288750476971	0.11828639204600579	1.5920393130302786
GBRR3_HUMAN	111320	Calculus urinary	689	21	0.009522416522130131	0.013967889871753514	1.8864675876418202
GBRR3_HUMAN	111320	Cardiac discomfort	526	10	0.6036756104823321	0.4506744430312029	1.1629386752904538
GBRR3_HUMAN	111320	Cardiac disorder	43611	758	0.10373172324142561	0.11332085754298643	1.0614376547476365
GBRR3_HUMAN	111320	Cardiac failure	31046	916	1.3222041802007321e-60	1.7380651689719672e-59	1.8243277215668265
GBRR3_HUMAN	111320	Cardiac failure congestive	55736	929	0.6035952921494141	0.4506270004164648	1.0171528000838088
GBRR3_HUMAN	111320	Cardiac flutter	2515	66	0.0002829189616273518	0.0005480543670305889	1.6171923040298775
GBRR3_HUMAN	111320	Cardiac pacemaker insertion	2899	50	0.7140987301103279	0.5135839969022331	1.0531350587045878
GBRR3_HUMAN	111320	Cardiac valve disease	2957	93	7.46469394947914e-09	2.3028208395537066e-08	1.948571967522287
GBRR3_HUMAN	111320	Cardiotoxicity	1900	44	0.02375265842391306	0.03164881912167832	1.4225948105492707
GBRR3_HUMAN	111320	Cardioversion	653	21	0.004647018949410268	0.007294167534499434	1.9939246021277468
GBRR3_HUMAN	111320	Carotid artery occlusion	1869	46	0.007953797485791917	0.011882018758643354	1.5141806032196496
GBRR3_HUMAN	111320	Carpal tunnel syndrome	5448	170	1.7935782323284075e-14	7.75233128845653e-14	1.9327961462008074
GBRR3_HUMAN	111320	Cartilage injury	1011	24	0.08066823668375717	0.09158303722624414	1.4591522345285695
GBRR3_HUMAN	111320	Cataplexy	567	14	0.13245202397353703	0.13910875304824083	1.519180649240188
GBRR3_HUMAN	111320	Cataract	19101	430	2.6300543710410857e-10	8.978030319056825e-10	1.3819979287314335
GBRR3_HUMAN	111320	Cataract operation	2902	67	0.006653329626377596	0.010104679563219423	1.4181698723859464
GBRR3_HUMAN	111320	Catheter placement	780	18	0.15521716057012805	0.15765717654662592	1.4175032042123015
GBRR3_HUMAN	111320	Catheter site pain	754	16	0.31177060889962016	0.2739304631488952	1.3009785505688332
GBRR3_HUMAN	111320	Catheterisation cardiac	1933	55	0.00014557579702590513	0.00029393377986723705	1.7574121195283856
GBRR3_HUMAN	111320	Cellulitis	19973	530	2.364246223456166e-25	1.5372808723445529e-24	1.635758210761885
GBRR3_HUMAN	111320	Central nervous system lesion	6484	109	0.7690370396767396	0.5408727975278054	1.0260129074986086
GBRR3_HUMAN	111320	Cerebellar haemorrhage	588	15	0.10015768475733275	0.11030244968875116	1.5708805142666862
GBRR3_HUMAN	111320	Cerebral haemorrhage	15194	371	3.2135783020690164e-13	1.3016995299251466e-12	1.5019114095858013
GBRR3_HUMAN	111320	Cerebral thrombosis	1464	36	0.01758938526728541	0.02424586312374563	1.5127975372685905
GBRR3_HUMAN	111320	Cerebrovascular disorder	2354	67	2.9460294868263442e-05	6.501248432610001e-05	1.7579849533074585
GBRR3_HUMAN	111320	Cervical dysplasia	1158	21	0.6420162792541554	0.47289221661723596	1.108320447268897
GBRR3_HUMAN	111320	Cervix carcinoma	1033	24	0.08572625753595546	0.09659641168595476	1.427337220495241
GBRR3_HUMAN	111320	Change of bowel habit	1086	33	0.0010663544286846442	0.0018848492834922736	1.8805811740594351
GBRR3_HUMAN	111320	Chapped lips	1841	32	0.712991215516563	0.5129386544789718	1.0614949367825306
GBRR3_HUMAN	111320	Cheilitis	2775	80	2.8918186737076684e-06	7.1263361681810675e-06	1.781302727866046
GBRR3_HUMAN	111320	Chest discomfort	37547	765	4.239574536062564e-09	1.3318570466135552e-08	1.2480517989346795
GBRR3_HUMAN	111320	Chest pain	87901	2326	3.4985925564266024e-105	7.467642863064872e-104	1.6310576746741543
GBRR3_HUMAN	111320	Chills	47592	1068	4.539555373372529e-23	2.74988116319221e-22	1.3775289069909418
GBRR3_HUMAN	111320	Choking	6723	157	2.221784942570554e-05	4.9745771809969206e-05	1.4348459939480696
GBRR3_HUMAN	111320	Choking sensation	2221	61	0.0001517287292958885	0.0003055241688204939	1.6946600807149226
GBRR3_HUMAN	111320	Cholangitis	1980	60	1.145281496702966e-05	2.648073313074386e-05	1.8752386139058568
GBRR3_HUMAN	111320	Cholecystectomy	7079	128	0.26082371121365383	0.2388594856567313	1.1050176035906187
GBRR3_HUMAN	111320	Cholecystitis	5998	183	1.2671056809930882e-14	5.5161213247710754e-14	1.8884604166866206
GBRR3_HUMAN	111320	Cholecystitis acute	2894	68	0.00416944349437688	0.006616338203351295	1.4439204613797398
GBRR3_HUMAN	111320	Cholecystitis chronic	6453	131	0.016117806569067646	0.022425692955851742	1.2434356642665854
GBRR3_HUMAN	111320	Cholecystitis infective	1008	22	0.17120241781349504	0.17088878252552894	1.3389127628699018
GBRR3_HUMAN	111320	Cholelithiasis	17633	502	1.630683229950231e-30	1.2255063066961821e-29	1.7584398513679111
GBRR3_HUMAN	111320	Chondropathy	1392	32	0.05697392393517833	0.06801405147817459	1.4119443681173511
GBRR3_HUMAN	111320	Chromatopsia	586	10	0.8698201163945621	0.5939502661109054	1.0417992299476984
GBRR3_HUMAN	111320	Chromaturia	10041	215	0.0001339857235780475	0.00027196378736490533	1.313010549936118
GBRR3_HUMAN	111320	Chronic lymphocytic leukaemia	1534	29	0.42019403170190767	0.3447568075399756	1.1562933114316514
GBRR3_HUMAN	111320	Clavicle fracture	1478	44	0.0002863646595301024	0.0005542451691103237	1.8412384716732544
GBRR3_HUMAN	111320	Cleft lip	559	13	0.1829855014911968	0.1805454694304336	1.4287532296425578
GBRR3_HUMAN	111320	Cleft palate	1117	36	0.00020401730345277319	0.0004033119881590566	1.998404147289128
GBRR3_HUMAN	111320	Clostridial infection	7774	137	0.3955357513904685	0.32859331957870663	1.0764758522146494
GBRR3_HUMAN	111320	Clostridium colitis	965	24	0.05516136724210659	0.06620899239893119	1.5304816742611032
GBRR3_HUMAN	111320	Clostridium difficile colitis	4052	122	6.118888973570591e-10	2.0382466019864914e-09	1.862832455137014
GBRR3_HUMAN	111320	Coarctation of the aorta	623	11	0.7511584566579959	0.5307377875946303	1.0785686145340876
GBRR3_HUMAN	111320	Cognitive disorder	16735	511	4.770039075944491e-38	4.26221028200482e-37	1.8900333958696114
GBRR3_HUMAN	111320	Cold sweat	7816	224	8.197333790452403e-15	3.603615696942345e-14	1.7705097977446236
GBRR3_HUMAN	111320	Colitis	10610	242	7.579750814247338e-07	1.979121167940875e-06	1.4006411869296833
GBRR3_HUMAN	111320	Colonoscopy	702	14	0.454222994256629	0.3660276911770842	1.2210856090549767
GBRR3_HUMAN	111320	Colostomy	731	15	0.3788631315766264	0.3192449067633048	1.2571432048530884
GBRR3_HUMAN	111320	Coma hepatic	549	16	0.02700943607657308	0.03544669479260321	1.8013549161722306
GBRR3_HUMAN	111320	Complications of transplanted kidney	1200	25	0.21102793532402098	0.20172419171561132	1.2767582052124982
GBRR3_HUMAN	111320	Concomitant disease aggravated	1409	36	0.011208550653339148	0.016189869808238472	1.5733975842822632
GBRR3_HUMAN	111320	Concomitant disease progression	1376	37	0.003965150427633257	0.00631834178356426	1.6581646892192194
GBRR3_HUMAN	111320	Condition aggravated	75043	2368	4.1811443698079073e-188	1.5588305320477677e-186	1.955253955381221
GBRR3_HUMAN	111320	Congenital cardiovascular anomaly	599	10	0.8718906180718269	0.5951516241255903	1.0188053589980888
GBRR3_HUMAN	111320	Congenital central nervous system anomaly	538	13	0.16954137054672344	0.16953709836752828	1.48590335882826
GBRR3_HUMAN	111320	Conjunctival haemorrhage	1679	50	0.00010046661181757101	0.00020742759425837573	1.841854992172726
GBRR3_HUMAN	111320	Conjunctival hyperaemia	1341	41	0.00021435248949683435	0.00042243497596777216	1.8925485088034495
GBRR3_HUMAN	111320	Conjunctivitis	4542	120	8.087664777048932e-07	2.1064075773690134e-06	1.628429732564109
GBRR3_HUMAN	111320	Constipation	68109	2127	2.7623378710268625e-164	9.071878517144779e-163	1.934410006015099
GBRR3_HUMAN	111320	Contraindication to medical treatment	775	18	0.15363917109427982	0.15631813352538768	1.4268658409640338
GBRR3_HUMAN	111320	Contrast media reaction	1167	32	0.00538619779698347	0.00834903200321521	1.6918452340436985
GBRR3_HUMAN	111320	Contusion	36286	907	2.587209252245133e-33	2.0806565542195455e-32	1.5383963800560672
GBRR3_HUMAN	111320	Corneal abrasion	566	15	0.0664855711772574	0.07779423322280034	1.6336016963245212
GBRR3_HUMAN	111320	Coronary artery disease	23294	609	2.5095389893554213e-27	1.7289062933417958e-26	1.6109609921885537
GBRR3_HUMAN	111320	Coronary artery occlusion	8868	229	9.490451767373704e-11	3.3297232438423094e-10	1.5906642623801504
GBRR3_HUMAN	111320	Cough	87425	1712	3.6143408611549534e-13	1.4602000666227245e-12	1.1985704878398664
GBRR3_HUMAN	111320	Crying	18791	563	1.1904064761264635e-39	1.0992013136781325e-38	1.8534287287759448
GBRR3_HUMAN	111320	Culture positive	734	21	0.018354599744970758	0.02515896733987439	1.7674058184358148
GBRR3_HUMAN	111320	Cushing's syndrome	1424	24	0.8345832639728783	0.5744947628578745	1.0287023253426415
GBRR3_HUMAN	111320	Cutaneous vasculitis	602	17	0.034192074000988226	0.043646466495814586	1.7438116341278398
GBRR3_HUMAN	111320	Cyst	4777	119	1.377228493665376e-05	3.157388091318078e-05	1.5330417865507735
GBRR3_HUMAN	111320	Cystitis	12614	262	0.00019530494547410684	0.00038724431859892987	1.2728303545164106
GBRR3_HUMAN	111320	Cytogenetic abnormality	707	18	0.07247946362601101	0.0838042675582447	1.5676885944989458
GBRR3_HUMAN	111320	Cytomegalovirus viraemia	808	16	0.40517055145163866	0.3347218051302525	1.2122754675755036
GBRR3_HUMAN	111320	Dark circles under eyes	556	10	0.7364341954094349	0.5232563272065407	1.0990409458788906
GBRR3_HUMAN	111320	Daydreaming	543	17	0.010746786927240407	0.015580630230306987	1.9394102774995938
GBRR3_HUMAN	111320	Deafness	8932	195	0.00010288082029233497	0.00021210622485822434	1.3393028443141293
GBRR3_HUMAN	111320	Deafness bilateral	631	19	0.011369675401589383	0.01639918894141672	1.8629821523770607
GBRR3_HUMAN	111320	Deafness unilateral	2393	50	0.0900681167096587	0.10082470150927184	1.280572677016377
GBRR3_HUMAN	111320	Decreased appetite	86284	2408	1.0387842807977214e-131	2.7528895587586837e-130	1.722762013366514
GBRR3_HUMAN	111320	Decreased immune responsiveness	1607	28	0.694274304967464	0.5024568380901625	1.064099935439929
GBRR3_HUMAN	111320	Deep vein thrombosis	38143	960	3.2745454257078394e-36	2.8126344365199435e-35	1.5492921555331178
GBRR3_HUMAN	111320	Defaecation urgency	1590	29	0.5523251856585584	0.4220063237903116	1.1148119370305158
GBRR3_HUMAN	111320	Deformity	4753	104	0.004195982764471841	0.006654711715258098	1.3423949466721212
GBRR3_HUMAN	111320	Dehydration	59381	1748	9.374354339987575e-114	2.158937048812045e-112	1.8200223328203984
GBRR3_HUMAN	111320	Dementia	7944	236	3.5172848296318314e-17	1.720582292664791e-16	1.8372861977448145
GBRR3_HUMAN	111320	Dementia Alzheimer's type	3683	94	5.21393105176948e-05	0.00011163110583678385	1.5716683618358367
GBRR3_HUMAN	111320	Demyelination	1977	43	0.06278985601579393	0.07400840986048303	1.3341925195110957
GBRR3_HUMAN	111320	Dental care	734	19	0.056167031228935196	0.06720477665942687	1.5946084996570085
GBRR3_HUMAN	111320	Dermatitis	5373	151	6.826821563420616e-10	2.2669577602856823e-09	1.7351882386811759
GBRR3_HUMAN	111320	Dermatitis acneiform	2078	41	0.2257755871274956	0.21311089972702718	1.2078120085638118
GBRR3_HUMAN	111320	Dermatitis allergic	3746	88	0.0012386930778073041	0.0021632954853584426	1.4435953900379699
GBRR3_HUMAN	111320	Dermatitis contact	4074	84	0.04127593455687434	0.051458540824226254	1.26331864515763
GBRR3_HUMAN	111320	Dermatomyositis	793	14	0.7784119294362223	0.5449818954466369	1.0784427458662693
GBRR3_HUMAN	111320	Device failure	6439	119	0.18479370319650773	0.18204376682394455	1.1298906078723898
GBRR3_HUMAN	111320	Device occlusion	1935	35	0.5303375628799943	0.41089454469984354	1.1054038145129264
GBRR3_HUMAN	111320	Device related infection	6752	136	0.018639731972974728	0.025499084482903455	1.2335305997155819
GBRR3_HUMAN	111320	Diabetic complication	1638	51	2.2968266473580263e-05	5.133196883654342e-05	1.9284117315024312
GBRR3_HUMAN	111320	Diabetic foot	953	22	0.12304848401868435	0.13066169049946713	1.4180107241565234
GBRR3_HUMAN	111320	Diabetic ketoacidosis	6776	190	5.540553214722371e-12	2.093038485680006e-11	1.7311647088593398
GBRR3_HUMAN	111320	Dialysis	7528	218	7.192488298828014e-15	3.1710079759797284e-14	1.7895573967998986
GBRR3_HUMAN	111320	Diarrhoea	196036	4122	7.934781539102058e-56	9.72007578765742e-55	1.2888662324199285
GBRR3_HUMAN	111320	Diarrhoea haemorrhagic	3496	68	0.16112083880708689	0.16265090551106445	1.1903498319309058
GBRR3_HUMAN	111320	Discomfort	14904	293	0.00214324634810508	0.003594464212399302	1.2033561867073654
GBRR3_HUMAN	111320	Disease recurrence	9187	261	1.6960743881508623e-16	8.059415772825877e-16	1.7546485439549315
GBRR3_HUMAN	111320	Disturbance in social behaviour	1133	22	0.411059650184073	0.33854105976294446	1.1882700127720283
GBRR3_HUMAN	111320	Diverticulitis	9249	248	4.0862908781979803e-13	1.6462499716741868e-12	1.653360031102864
GBRR3_HUMAN	111320	Dizziness	194627	4520	2.9521681340755255e-114	6.824809073847803e-113	1.4267465854247512
GBRR3_HUMAN	111320	Drug exposure during pregnancy	37554	733	3.338593889184166e-06	8.177058177660495e-06	1.1945790969222938
GBRR3_HUMAN	111320	Drug hypersensitivity	47950	963	6.533628068684041e-10	2.172223654565713e-09	1.2298583251989463
GBRR3_HUMAN	111320	Drug ineffective for unapproved indication	9609	173	0.21251639886718854	0.20281303064916273	1.1001823830630377
GBRR3_HUMAN	111320	Drug intolerance	17455	295	0.591056283177556	0.44463850466305105	1.0315997969272315
GBRR3_HUMAN	111320	Drug tolerance decreased	503	13	0.10945288750476971	0.11828639204600579	1.5920393130302786
GBRR3_HUMAN	111320	Dry eye	10169	198	0.017033023558073374	0.02356415120823739	1.191606845623058
GBRR3_HUMAN	111320	Dry mouth	31743	872	6.811649445238992e-46	7.099813554460308e-45	1.6950101481140563
GBRR3_HUMAN	111320	Dry skin	18694	314	0.6445175944917834	0.47434206243084326	1.0251576492125163
GBRR3_HUMAN	111320	Duodenal ulcer haemorrhage	1322	42	7.698533117692563e-05	0.00016130295132873564	1.9690005446011498
GBRR3_HUMAN	111320	Dysentery	591	10	0.8705530218799209	0.594371454135442	1.032833659982572
GBRR3_HUMAN	111320	Dysfunctional uterine bleeding	747	15	0.3866793173095261	0.3235837980488707	1.2296646648562997
GBRR3_HUMAN	111320	Dysgeusia	33438	656	5.737393726976303e-06	1.370514229216356e-05	1.2008116949274525
GBRR3_HUMAN	111320	Dysgraphia	2700	75	1.9001976697514552e-05	4.288738125974665e-05	1.7145038755710693
GBRR3_HUMAN	111320	Dysmorphism	1341	22	0.9145452850778455	0.6201341955643838	1.0008855073462648
GBRR3_HUMAN	111320	Dyspepsia	38576	823	2.015949819875851e-13	8.256778296456637e-13	1.308141979069866
GBRR3_HUMAN	111320	Dysphonia	20681	412	9.760302392591184e-05	0.00020186765138302542	1.2197516347986983
GBRR3_HUMAN	111320	Dyspnoea	211378	4714	8.915988824332124e-95	1.7281778825347053e-93	1.3687724733406434
GBRR3_HUMAN	111320	Dyspnoea at rest	521	16	0.02225770512991695	0.02988036200784015	1.9012320204352453
GBRR3_HUMAN	111320	Dyspnoea exertional	10679	305	2.4634879112326706e-19	1.3112888801994203e-18	1.7642499394371665
GBRR3_HUMAN	111320	Dysstasia	11908	303	5.24171673683228e-13	2.099854780394128e-12	1.5667654976674872
GBRR3_HUMAN	111320	Dystonia	12009	317	1.8061194877422268e-15	8.192662721891516e-15	1.6269603574633094
GBRR3_HUMAN	111320	Ear congestion	1024	20	0.3890010774888691	0.32494582077144024	1.1953712279877973
GBRR3_HUMAN	111320	Ear discomfort	3627	81	0.007156407320692411	0.010797692738051841	1.3707327939210325
GBRR3_HUMAN	111320	Ear disorder	1755	37	0.1311888466226338	0.1380018397368842	1.29236467919938
GBRR3_HUMAN	111320	Ear haemorrhage	730	19	0.055336054107635535	0.06639106300790476	1.6035795741979764
GBRR3_HUMAN	111320	Ear infection	7731	143	0.1512496868884345	0.1543215876797049	1.1308766337945706
GBRR3_HUMAN	111320	Ear pain	7276	213	5.090861302498308e-15	2.2601548152443778e-14	1.8096596902707522
GBRR3_HUMAN	111320	Ear pruritus	757	15	0.47113932380494905	0.37597560642608424	1.2130923647908507
GBRR3_HUMAN	111320	Eczema	7102	217	4.2041108347794e-17	2.0494053416206338e-16	1.8913081967991678
GBRR3_HUMAN	111320	Electrocardiogram change	667	19	0.020849544770083266	0.02820045902848563	1.7594831439116683
GBRR3_HUMAN	111320	Embolic stroke	1594	38	0.02309187986728902	0.030876285674832804	1.4654821044405668
GBRR3_HUMAN	111320	Embolism	4832	93	0.12549025023119892	0.1328498649329142	1.1776134448161701
GBRR3_HUMAN	111320	Embolism venous	914	17	0.6003645417644682	0.44889735189156715	1.1372684570398954
GBRR3_HUMAN	111320	Encephalitis	2405	74	7.134756337554509e-07	1.8676903294757823e-06	1.905004306190077
GBRR3_HUMAN	111320	Endocrine disorder	532	16	0.023717937925551026	0.03160795716960535	1.8607018804647264
GBRR3_HUMAN	111320	Endometriosis	1980	48	0.009854540226690016	0.014408030658460774	1.4908729352791907
GBRR3_HUMAN	111320	Energy increased	2484	54	0.03966343951889688	0.04971276827562194	1.333503014333054
GBRR3_HUMAN	111320	Enteritis	1716	37	0.10461989735414158	0.11403920740653417	1.3223838706757205
GBRR3_HUMAN	111320	Enteritis infectious	631	16	0.08270801507500569	0.09360797607665736	1.5611742606825998
GBRR3_HUMAN	111320	Enterocolitis	1537	45	0.00026577307491768823	0.0005168977770925223	1.8098817721343392
GBRR3_HUMAN	111320	Enterocolitis haemorrhagic	719	14	0.4623634443668111	0.3707774064172243	1.191640991531665
GBRR3_HUMAN	111320	Enterocolitis infectious	771	20	0.04545529407723069	0.05594202653296321	1.5980728533951378
GBRR3_HUMAN	111320	Eosinophilic pneumonia	1057	27	0.027890965969195363	0.036486220693110825	1.5730156916647189
GBRR3_HUMAN	111320	Epigastric discomfort	1440	43	0.00024342319998176253	0.00047600790586755173	1.8470496297311805
GBRR3_HUMAN	111320	Epistaxis	27847	565	6.715120229588608e-07	1.761878446338559e-06	1.242735654989293
GBRR3_HUMAN	111320	Erectile dysfunction	11683	261	1.415590026021264e-06	3.601964710406539e-06	1.3712128264175902
GBRR3_HUMAN	111320	Erysipelas	1757	51	0.0001467625155615488	0.00029617416336015447	1.793897665823188
GBRR3_HUMAN	111320	Erythema	61594	1227	1.880329250307835e-11	6.887814929749408e-11	1.2196956770487115
GBRR3_HUMAN	111320	Erythema multiforme	4365	132	8.282690150120683e-11	2.916204277852807e-10	1.8712515722037186
GBRR3_HUMAN	111320	Escherichia infection	2903	90	2.901296514127493e-08	8.548365135121528e-08	1.9199030245463449
GBRR3_HUMAN	111320	Escherichia sepsis	1280	34	0.0077144141734554455	0.011559841339003766	1.637447521612819
GBRR3_HUMAN	111320	Exercise tolerance decreased	1990	36	0.5357755924426296	0.41332312962071116	1.1055654468882024
GBRR3_HUMAN	111320	Exfoliative rash	1333	23	0.7461832610897041	0.5280918968191832	1.053569175446344
GBRR3_HUMAN	111320	Exophthalmos	816	26	0.0020200094961819078	0.003403146668593992	1.9749348440122443
GBRR3_HUMAN	111320	Extradural haematoma	669	19	0.02117524008437916	0.02859600144463061	1.7540693496227093
GBRR3_HUMAN	111320	Extrapyramidal disorder	18110	491	1.8248072858561606e-25	1.190305889120029e-24	1.672271360558989
GBRR3_HUMAN	111320	Extremity necrosis	712	21	0.011010840416075796	0.01592834993046587	1.8236763365336266
GBRR3_HUMAN	111320	Eye discharge	2785	61	0.02504518283819924	0.03316713293335637	1.3437833239149166
GBRR3_HUMAN	111320	Eye disorder	11497	230	0.0028896451270624124	0.004729755505481479	1.2249717048324407
GBRR3_HUMAN	111320	Eye infection	3146	67	0.034803529026421864	0.04433989475211094	1.3057848613881642
GBRR3_HUMAN	111320	Eye injury	927	18	0.43652189976366007	0.3554117403663786	1.1882700127720283
GBRR3_HUMAN	111320	Eye oedema	1054	18	0.8079514752968174	0.5601103016010534	1.0426037081175423
GBRR3_HUMAN	111320	Eye pain	16354	312	0.007980989724203583	0.011917635495438637	1.167085296174796
GBRR3_HUMAN	111320	Eyelid disorder	974	22	0.12878719525342736	0.1358380002120637	1.3867310758295412
GBRR3_HUMAN	111320	Eyelid oedema	6795	156	5.667566297390225e-05	0.0001207475347515232	1.4100302998370295
GBRR3_HUMAN	111320	Eyelid ptosis	3931	76	0.14805351354142887	0.15170698651424136	1.1830299115483902
GBRR3_HUMAN	111320	Face oedema	8154	254	8.59647083109699e-21	4.826046368631959e-20	1.9293594245350387
GBRR3_HUMAN	111320	Facial pain	3567	103	1.0228661595736587e-07	2.8839948264505475e-07	1.7842917065339794
GBRR3_HUMAN	111320	Facial palsy	2915	87	2.4853664486236756e-07	6.77651589732205e-07	1.8460623412708295
GBRR3_HUMAN	111320	Facial paresis	1811	34	0.4042890599212135	0.3341699557478322	1.1481483466120272
GBRR3_HUMAN	111320	Faeces discoloured	9398	173	0.12241655289192437	0.13008413493542037	1.1253464462420406
GBRR3_HUMAN	111320	Faeces hard	1050	26	0.0382484250493623	0.048138262562231644	1.5236313737985088
GBRR3_HUMAN	111320	Faeces pale	963	16	0.8988122384209004	0.6106909807128115	1.0138565684475171
GBRR3_HUMAN	111320	Failure to thrive	2898	72	0.0007293264138539568	0.001324477826746729	1.52885695910796
GBRR3_HUMAN	111320	Family stress	2785	78	9.277657612377492e-06	2.167107890924757e-05	1.7290711415991942
GBRR3_HUMAN	111320	Fanconi syndrome	566	15	0.0664855711772574	0.07779423322280034	1.6336016963245212
GBRR3_HUMAN	111320	Fanconi syndrome acquired	610	18	0.01615540322867002	0.022473675919276	1.8245564892056987
GBRR3_HUMAN	111320	Fatigue	241583	4816	9.602219211978787e-42	9.241451866187418e-41	1.2205956626821282
GBRR3_HUMAN	111320	Febrile convulsion	611	16	0.07586782296862582	0.08700064781126265	1.61365070641983
GBRR3_HUMAN	111320	Febrile neutropenia	21024	401	0.0027554445964579075	0.0045264897139239485	1.1668070549212024
GBRR3_HUMAN	111320	Feeling abnormal	97802	2307	3.0516782165087307e-63	4.155696198059059e-62	1.4496844382741085
GBRR3_HUMAN	111320	Feeling cold	11506	282	1.4044036818706807e-10	4.875444663454411e-10	1.5076758064759848
GBRR3_HUMAN	111320	Feeling hot	26605	450	0.49815228516862875	0.39265052114570725	1.0324387704165299
GBRR3_HUMAN	111320	Feeling jittery	9382	222	1.7600741437175438e-07	4.862863162122887e-07	1.454333527640525
GBRR3_HUMAN	111320	Feelings of worthlessness	885	18	0.3515093215240659	0.3007259269069203	1.2458332659858982
GBRR3_HUMAN	111320	Femoral neck fracture	2044	63	4.51281544359266e-06	1.090342019773294e-05	1.9083700381798119
GBRR3_HUMAN	111320	Fistula	4271	90	0.018621966174505934	0.0254781847021096	1.2917214082872204
GBRR3_HUMAN	111320	Flank pain	4032	125	6.794121186396983e-11	2.404856658638587e-10	1.9198757245004936
GBRR3_HUMAN	111320	Flatulence	21703	380	0.19863992428622818	0.1925675772305463	1.0694040024900446
GBRR3_HUMAN	111320	Fluid overload	9356	160	0.5684750518121998	0.43162219028072035	1.0440649959980413
GBRR3_HUMAN	111320	Foaming at mouth	1010	30	0.00257246234667307	0.0042496895802642525	1.8369684381118598
GBRR3_HUMAN	111320	Focal segmental glomerulosclerosis	552	13	0.17793411620742877	0.17643646892464954	1.4473084663911624
GBRR3_HUMAN	111320	Foetal disorder	564	11	0.5057617212072778	0.3968964759882578	1.1936419386887192
GBRR3_HUMAN	111320	Foetal distress syndrome	1087	29	0.011623079064911602	0.01672354835441473	1.6448217709873678
GBRR3_HUMAN	111320	Folliculitis	1498	42	0.0010325041311295927	0.0018297256184012067	1.7309894897592526
GBRR3_HUMAN	111320	Food craving	1577	40	0.009415076033665978	0.013830490336005	1.5616821247882218
GBRR3_HUMAN	111320	Food interaction	778	14	0.6709978108547592	0.4896328592136336	1.0996163599866804
GBRR3_HUMAN	111320	Food poisoning	1520	29	0.41740067104079304	0.34285869753913145	1.1671505256234977
GBRR3_HUMAN	111320	Foot deformity	3714	93	9.882895538155593e-05	0.00020423526354253676	1.5412068806914747
GBRR3_HUMAN	111320	Foot fracture	7744	208	2.641869203888769e-11	9.591280684973582e-11	1.6562617057002897
GBRR3_HUMAN	111320	Foreign body trauma	810	20	0.07043726929159339	0.08182525293407833	1.519180649240188
GBRR3_HUMAN	111320	Formication	3416	94	2.806954710041419e-06	6.927713600877043e-06	1.6979884860411854
GBRR3_HUMAN	111320	Fracture	5789	137	4.056167054038004e-05	8.800277611954339e-05	1.4545375235957674
GBRR3_HUMAN	111320	Fracture nonunion	1077	24	0.14733075315260213	0.15112831419205322	1.3676953993159526
GBRR3_HUMAN	111320	Frustration	3738	106	1.4576578579166436e-07	4.0564563380717726e-07	1.7513241680530474
GBRR3_HUMAN	111320	Fungaemia	512	10	0.4881085573045282	0.3865876054950065	1.1953712279877973
GBRR3_HUMAN	111320	Fungal infection	12022	237	0.005021143582074247	0.007830487602297459	1.2067721381299974
GBRR3_HUMAN	111320	Fungal skin infection	1244	25	0.31278255570862934	0.27463178454225284	1.2306734135559356
GBRR3_HUMAN	111320	Furuncle	3104	70	0.0106565699645905	0.015460115378113847	1.384487308882373
GBRR3_HUMAN	111320	Gait disturbance	78304	2172	2.0643955311411973e-116	4.848868364407642e-115	1.7119816190420938
GBRR3_HUMAN	111320	Galactorrhoea	3656	83	0.0040528559271889135	0.006447264249926427	1.3939641081819076
GBRR3_HUMAN	111320	Gallbladder cholesterolosis	530	9	0.8632817807922748	0.5902732545334252	1.036600231871184
GBRR3_HUMAN	111320	Gallbladder disorder	11418	225	0.006314260059065531	0.009640168244024222	1.2062644527939044
GBRR3_HUMAN	111320	Gallbladder non-functioning	573	11	0.5118934011782648	0.4005418885204421	1.1745266763253766
GBRR3_HUMAN	111320	Gambling	528	12	0.2293159210304047	0.21583888179078772	1.3955264103485445
GBRR3_HUMAN	111320	Gangrene	2534	61	0.003697258656541472	0.0059237002388834205	1.4801721691646714
GBRR3_HUMAN	111320	Gastric cancer	2829	64	0.011660466910023962	0.016771820192330957	1.3889651650196004
GBRR3_HUMAN	111320	Gastric disorder	13927	263	0.023041132461924952	0.030815706512472067	1.155006453061453
GBRR3_HUMAN	111320	Gastric perforation	997	26	0.023550847881822462	0.03141249600792723	1.6067955991448744
GBRR3_HUMAN	111320	Gastric ulcer haemorrhage	2788	81	1.5365807013448907e-06	3.8959879684725944e-06	1.7955738778145478
GBRR3_HUMAN	111320	Gastroenteritis	6181	198	1.0074395875585474e-17	5.038591873506362e-17	1.9858786324097457
GBRR3_HUMAN	111320	Gastroenteritis viral	6158	113	0.22788166445936625	0.2147369413645055	1.121730823471229
GBRR3_HUMAN	111320	Gastrointestinal carcinoma	1119	21	0.48025362790274717	0.3816887374388721	1.1476870205325465
GBRR3_HUMAN	111320	Gastrointestinal disorder	23106	431	0.007506567143043791	0.011276875447164242	1.1406082012343806
GBRR3_HUMAN	111320	Gastrointestinal haemorrhage	40935	936	1.3425010090091822e-22	8.007167836143162e-22	1.4042137794371916
GBRR3_HUMAN	111320	Gastrointestinal infection	2931	53	0.46621899925943067	0.3730195956704915	1.1050745966589068
GBRR3_HUMAN	111320	Gastrointestinal motility disorder	1540	44	0.0005699175984344722	0.0010526829912677314	1.7649304601466889
GBRR3_HUMAN	111320	Gastrointestinal obstruction	614	18	0.023801915151467595	0.03170657400182502	1.81231114364056
GBRR3_HUMAN	111320	Gastrointestinal oedema	705	18	0.07197546516602181	0.08334437902110028	1.572252462314081
GBRR3_HUMAN	111320	Gastrointestinal pain	3399	77	0.0055417970169217195	0.008568487292734675	1.3909054619699073
GBRR3_HUMAN	111320	Gastrointestinal sounds abnormal	1881	60	2.6377962192462832e-06	6.528324464556612e-06	1.977187335913918
GBRR3_HUMAN	111320	Gastrointestinal stoma complication	564	16	0.04330517331151684	0.05359906648522112	1.7520477560580272
GBRR3_HUMAN	111320	Gastrointestinal tube insertion	1006	25	0.04526589097812081	0.055732989405579206	1.5292465760700158
GBRR3_HUMAN	111320	Gastrointestinal ulcer	1053	22	0.2720667056352919	0.24689542562150624	1.2804733115322242
GBRR3_HUMAN	111320	Gastrointestinal ulcer haemorrhage	568	13	0.2423895570632707	0.2253723045394755	1.4055842583510567
GBRR3_HUMAN	111320	Gastrooesophageal reflux disease	32104	898	3.1748416056622534e-50	3.56121232035264e-49	1.7268107674549351
GBRR3_HUMAN	111320	Generalised erythema	4312	124	6.385817956235226e-09	1.979922415047683e-08	1.7767303772632377
GBRR3_HUMAN	111320	Genital herpes	668	18	0.044885213517890744	0.0553139324619646	1.6617499101688826
GBRR3_HUMAN	111320	Gestational diabetes	1651	38	0.040994369301391324	0.05115958964499515	1.4136950740914582
GBRR3_HUMAN	111320	Gingival bleeding	5125	148	1.7623140249446997e-10	6.080278506830236e-10	1.7844344133932366
GBRR3_HUMAN	111320	Gingival disorder	1963	56	0.00011399470185541875	0.0002335332851996505	1.7621539570630809
GBRR3_HUMAN	111320	Gingival hyperplasia	633	12	0.5320666233445792	0.41156619752236073	1.1595678385504815
GBRR3_HUMAN	111320	Gingival pain	3453	91	2.144575584170901e-05	4.81041748342707e-05	1.6242399892010275
GBRR3_HUMAN	111320	Gingival swelling	2096	62	1.4591910431166224e-05	3.335328679402033e-05	1.829141302846224
GBRR3_HUMAN	111320	Gingivitis	2465	72	5.090060396618452e-06	1.2230302059548453e-05	1.8054950967150416
GBRR3_HUMAN	111320	Glaucoma	7228	191	5.767375493510295e-10	1.9244811428430533e-09	1.6287421355965042
GBRR3_HUMAN	111320	Glioblastoma multiforme	522	10	0.6018677262197437	0.449704303516697	1.1720241336911608
GBRR3_HUMAN	111320	Glomerular filtration rate decreased	2906	89	6.895114542136923e-08	1.9714713287928342e-07	1.8958748925821372
GBRR3_HUMAN	111320	Glossitis	1604	45	0.0007395349464111643	0.0013416252512559665	1.7320998101503746
GBRR3_HUMAN	111320	Glossodynia	6926	134	0.05800413208429208	0.06905449917360357	1.183896227389328
GBRR3_HUMAN	111320	Glycosuria	651	20	0.007893500373920108	0.011800375931649185	1.9019852819330405
GBRR3_HUMAN	111320	Glycosylated haemoglobin increased	7587	131	0.5266145005749809	0.409508313815437	1.0543187056723915
GBRR3_HUMAN	111320	Granulocytopenia	3359	90	1.2006131385016173e-05	2.7705618031826935e-05	1.6520915289228717
GBRR3_HUMAN	111320	Granuloma	1618	52	8.037142081716648e-06	1.889810651184143e-05	1.9925907110723793
GBRR3_HUMAN	111320	Grip strength decreased	1906	49	0.0027417044015676105	0.004505436685210709	1.5834001866474872
GBRR3_HUMAN	111320	Groin pain	3689	113	1.0754230776123538e-09	3.524340059491321e-09	1.8962144373276228
GBRR3_HUMAN	111320	Guillain-Barre syndrome	1775	36	0.19022861669593177	0.18632752205375075	1.2422512266932415
GBRR3_HUMAN	111320	Haemangioma of liver	633	19	0.011611170081602283	0.016708025987552114	1.8569138066038453
GBRR3_HUMAN	111320	Haematochezia	16020	334	1.929153740678848e-05	4.35104041126598e-05	1.2777349423323854
GBRR3_HUMAN	111320	Haematuria	14435	425	7.304221453781301e-29	5.253143745398697e-28	1.8203601105724234
GBRR3_HUMAN	111320	Haemoglobin abnormal	1867	35	0.4110900704133257	0.33856253760648997	1.1464340871040173
GBRR3_HUMAN	111320	Haemoglobin decreased	45850	1318	6.965427700254422e-80	1.1669620502896955e-78	1.7760276605607974
GBRR3_HUMAN	111320	Haemolysis	3349	56	0.8382397465334481	0.5766585501505277	1.0204760389065581
GBRR3_HUMAN	111320	Haemolytic anaemia	4277	92	0.01122902285305109	0.016216644456728876	1.3191642722434511
GBRR3_HUMAN	111320	Haemolytic uraemic syndrome	1299	23	0.6617227221947284	0.4846855712415865	1.0816423352936606
GBRR3_HUMAN	111320	Haemoptysis	11149	303	1.991926040322402e-16	9.436538353400943e-16	1.6764073022709929
GBRR3_HUMAN	111320	Haemorrhage	41371	744	0.011567543696931193	0.01665153648658385	1.0989165067534064
GBRR3_HUMAN	111320	Haemorrhage subcutaneous	1493	43	0.0004895344331474911	0.0009144390082251327	1.7795367811961789
GBRR3_HUMAN	111320	Haemorrhage urinary tract	915	16	0.79351691689685	0.5527822221735047	1.0679890659842033
GBRR3_HUMAN	111320	Haemorrhagic anaemia	3518	100	2.675518476414125e-07	7.275331992202934e-07	1.7556359170563902
GBRR3_HUMAN	111320	Haemorrhagic diathesis	1460	42	0.0006066744095696449	0.0011157940834999882	1.7773770783423637
GBRR3_HUMAN	111320	Haemorrhagic stroke	3394	75	0.01211936471779668	0.017373577088514162	1.3560026132491885
GBRR3_HUMAN	111320	Haemorrhoidal haemorrhage	1941	49	0.004006447169378933	0.006378962952755824	1.554108956979061
GBRR3_HUMAN	111320	Hand deformity	1439	29	0.25250391058291033	0.23303878167695016	1.2341995983720817
GBRR3_HUMAN	111320	Hand fracture	2665	81	3.544891367712146e-07	9.538365912175072e-07	1.8810443062089712
GBRR3_HUMAN	111320	Head discomfort	4455	122	1.231122022892213e-07	3.447674434794268e-07	1.6895757093672894
GBRR3_HUMAN	111320	Headache	228199	4443	2.078625515187396e-30	1.5574143337620758e-29	1.1915386634131782
GBRR3_HUMAN	111320	Hearing impaired	6441	142	0.0006860842786953162	0.0012516845983311354	1.3527677824397863
GBRR3_HUMAN	111320	Heart injury	2391	51	0.06331525663370496	0.0745444276504545	1.3078587255958796
GBRR3_HUMAN	111320	Heart rate abnormal	1627	47	0.00026984535079159727	0.0005242817674362371	1.7850372628572209
GBRR3_HUMAN	111320	Heart rate increased	40011	1181	7.624856378685818e-78	1.2461973197456976e-76	1.8251099072039696
GBRR3_HUMAN	111320	Heart rate irregular	10465	285	1.0765599951420219e-15	4.933114263465343e-15	1.6799780116720446
GBRR3_HUMAN	111320	Heart valve replacement	567	10	0.7401056284543743	0.524844296748829	1.0773363670554295
GBRR3_HUMAN	111320	Heat rash	674	14	0.3596335210044582	0.3062371407263697	1.2728892409542787
GBRR3_HUMAN	111320	Helicobacter infection	1587	51	1.0248784550184905e-05	2.382676012467751e-05	1.992441027274973
GBRR3_HUMAN	111320	Hemianopia	536	10	0.6088920806565881	0.4536880001310804	1.140829574999761
GBRR3_HUMAN	111320	Hemiplegia	4142	131	6.151503085365617e-12	2.3177461621187087e-11	1.9598604511327233
GBRR3_HUMAN	111320	Henoch-Schonlein purpura	837	15	0.6819970577033795	0.49539622302561304	1.0950298475362668
GBRR3_HUMAN	111320	Hepatic cirrhosis	6661	190	1.2699925320466714e-12	4.979902280475249e-12	1.7619302692856762
GBRR3_HUMAN	111320	Hepatic enzyme abnormal	1701	47	0.0007542036392681473	0.0013661436866748932	1.7051746525480103
GBRR3_HUMAN	111320	Hepatic enzyme increased	22749	515	1.8052099792577084e-12	7.021160705685134e-12	1.3899402877200917
GBRR3_HUMAN	111320	Hepatic fibrosis	1411	28	0.29357106698556634	0.26158502979920706	1.2149051323641704
GBRR3_HUMAN	111320	Hepatic mass	563	14	0.13065733539839583	0.1375076484990233	1.5302493607100618
GBRR3_HUMAN	111320	Hepatic neoplasm	1501	32	0.12752010855773263	0.13468259137886798	1.3071779037709992
GBRR3_HUMAN	111320	Hepatic neoplasm malignant	2443	54	0.031028150463837095	0.04008604002133487	1.356388583017715
GBRR3_HUMAN	111320	Hepatic pain	1602	49	4.7644229858636505e-05	0.00010252914375890053	1.8933510280775168
GBRR3_HUMAN	111320	Hepatotoxicity	6522	138	0.003375703373358881	0.005449687394017507	1.297157537438638
GBRR3_HUMAN	111320	Hernia	6332	123	0.05978581158359234	0.07089287480106597	1.1887484593869309
GBRR3_HUMAN	111320	Hernia repair	1141	19	0.9069213317708781	0.6155315366891412	1.0161720831147605
GBRR3_HUMAN	111320	Herpes simplex	3165	65	0.06854413578530084	0.07991561006474401	1.2582246183626398
GBRR3_HUMAN	111320	Herpes virus infection	2401	58	0.004706301541391025	0.007379130828309893	1.4854643053389973
GBRR3_HUMAN	111320	Herpes zoster	19579	326	0.7565757587323827	0.5338331967508425	1.0160748569192282
GBRR3_HUMAN	111320	Hiccups	3250	72	0.01266112025856848	0.018079743057415238	1.3595184916422576
GBRR3_HUMAN	111320	Hidradenitis	528	10	0.6046405095960825	0.4511940053713818	1.1584485645750469
GBRR3_HUMAN	111320	High density lipoprotein decreased	2106	38	0.5470979259442128	0.41894136191337383	1.1026548135926124
GBRR3_HUMAN	111320	Hip arthroplasty	4799	83	0.6085561299380589	0.45349967990767137	1.0561140285271324
GBRR3_HUMAN	111320	Hip fracture	12219	215	0.2848384449590875	0.255327132227714	1.074778545790761
GBRR3_HUMAN	111320	Histiocytosis haematophagic	2196	58	0.000539639912271341	0.0010013126608087724	1.6278965703504538
GBRR3_HUMAN	111320	Hormone level abnormal	1668	28	0.847004945048998	0.581241682611195	1.0245206085729561
GBRR3_HUMAN	111320	Hot flush	24430	460	0.0031369295921622074	0.005099115318077066	1.1515858321524495
GBRR3_HUMAN	111320	Human herpesvirus 6 infection	573	13	0.24484204511905514	0.22719784408498447	1.3930343989014937
GBRR3_HUMAN	111320	Hunger	4205	70	0.8554501995592316	0.5858711038432359	1.0158487291775382
GBRR3_HUMAN	111320	Hydrocele	536	13	0.16853464651696382	0.1687224605551724	1.4915855896459587
GBRR3_HUMAN	111320	Hydrocephalus	2410	66	0.00010387913043885606	0.00021403600017992606	1.6896347920516936
GBRR3_HUMAN	111320	Hydronephrosis	3149	86	8.623428495411928e-06	2.0212347204019346e-05	1.6848373050828986
GBRR3_HUMAN	111320	Hyperbilirubinaemia	3886	118	6.282070533417666e-10	2.0909065518361854e-09	1.8792200122368672
GBRR3_HUMAN	111320	Hyperchlorhydria	1455	32	0.09755437031598926	0.10790398759522858	1.3494338303862248
GBRR3_HUMAN	111320	Hypercoagulation	1240	37	0.0006876471971722822	0.0012543666628237102	1.8456213789397629
GBRR3_HUMAN	111320	Hyperkeratosis	2127	62	2.4196111369881274e-05	5.392519482000178e-05	1.8016820387356998
GBRR3_HUMAN	111320	Hyperphosphataemia	745	24	0.002080801624510247	0.003497479259813637	1.99748024338377
GBRR3_HUMAN	111320	Hyperprolactinaemia	3685	69	0.26929439645844966	0.24489500339028938	1.1450572067212754
GBRR3_HUMAN	111320	Hypertension	83411	2489	1.1113827093310191e-168	3.745542452941266e-167	1.845715690669703
GBRR3_HUMAN	111320	Hypertransaminasaemia	545	15	0.05952901685030165	0.07063050702422388	1.698329310707191
GBRR3_HUMAN	111320	Hypertrichosis	554	10	0.7358530700662599	0.5230115446075868	1.1030815375916805
GBRR3_HUMAN	111320	Hyperuricaemia	1872	59	3.998869691201767e-06	9.713486028871778e-06	1.9528132945693644
GBRR3_HUMAN	111320	Hypoacusis	7855	147	0.10923728057334775	0.1180971967854453	1.1444113180868125
GBRR3_HUMAN	111320	Hypoaesthesia	62269	1546	2.8884886883285956e-54	3.4581544473564523e-53	1.5277869128196988
GBRR3_HUMAN	111320	Hypoaesthesia facial	1643	45	0.0012213904548894557	0.002135247918295275	1.6898270363106596
GBRR3_HUMAN	111320	Hypoaesthesia oral	6602	157	7.75982701827387e-06	1.8275545764626133e-05	1.4617841421664897
GBRR3_HUMAN	111320	Hypocalcaemia	7093	206	3.105355207972565e-14	1.3273514978185169e-13	1.7949140326509958
GBRR3_HUMAN	111320	Hypoglycaemia	22404	722	1.9907662320155427e-61	2.647457291540409e-60	1.9982249301577768
GBRR3_HUMAN	111320	Hypoglycaemic coma	1499	37	0.018515924302325175	0.02535164511514657	1.518661093614593
GBRR3_HUMAN	111320	Hypogonadism	575	14	0.13654620522310001	0.14252246864601376	1.4975167540638572
GBRR3_HUMAN	111320	Hypophosphataemia	2474	67	0.00012849325479596124	0.000261512129044424	1.6703413328683663
GBRR3_HUMAN	111320	Hypospadias	1062	28	0.015104831949560846	0.021157192679956208	1.6249649884522708
GBRR3_HUMAN	111320	Hysterectomy	3948	88	0.005666499996932426	0.008742802766142924	1.3680497245489363
GBRR3_HUMAN	111320	Idiopathic thrombocytopenic purpura	1737	36	0.15551424764579908	0.1579155806877335	1.2700028707933846
GBRR3_HUMAN	111320	Ileostomy	739	13	0.770749718952773	0.5418358025455488	1.0745168917146508
GBRR3_HUMAN	111320	Immobile	1848	53	0.00014904898837337272	0.0003005006452967362	1.7718131973171773
GBRR3_HUMAN	111320	Immune system disorder	4227	84	0.07858735779842685	0.08955136040027034	1.2166645894711425
GBRR3_HUMAN	111320	Immunodeficiency	2426	59	0.0038178362713786715	0.00610094937932828	1.495754331666353
GBRR3_HUMAN	111320	Immunosuppressant drug level increased	1020	21	0.2670860659086567	0.243396505157253	1.261421770315051
GBRR3_HUMAN	111320	Immunosuppression	2311	69	3.692721023958024e-06	9.00359605398552e-06	1.846800561777044
GBRR3_HUMAN	111320	Impaired healing	13368	317	3.9088376516201554e-10	1.319259163707268e-09	1.4575450539775505
GBRR3_HUMAN	111320	Impaired work ability	10329	185	0.22908629990786783	0.21566420473129896	1.0943821563803897
GBRR3_HUMAN	111320	Impetigo	566	17	0.018488502113622143	0.025318955042935503	1.858159938005075
GBRR3_HUMAN	111320	Implant site infection	1200	20	0.9092096843986108	0.6169016377100184	1.0170785702540242
GBRR3_HUMAN	111320	Inadequate analgesia	6253	180	2.9216107643831233e-12	1.1224521660026158e-11	1.7785895629997919
GBRR3_HUMAN	111320	Incision site complication	712	22	0.004774939594207532	0.007477001381470358	1.9132869336082947
GBRR3_HUMAN	111320	Incision site infection	878	21	0.08308051308874709	0.0939730118072268	1.4704321453264129
GBRR3_HUMAN	111320	Incision site pain	559	16	0.029548193964846092	0.03842675515111923	1.7681807924858173
GBRR3_HUMAN	111320	Incisional hernia	664	18	0.044113420871517844	0.054474534848223115	1.6720393832968634
GBRR3_HUMAN	111320	Incorrect drug administration rate	1155	30	0.014542224153985067	0.02044289004958462	1.6002036171996645
GBRR3_HUMAN	111320	Increased appetite	6638	207	2.6952617446645136e-17	1.3250772756856946e-16	1.9315161838769082
GBRR3_HUMAN	111320	Increased tendency to bruise	3947	85	0.014251801679131341	0.020069876645103433	1.3207273510678226
GBRR3_HUMAN	111320	Increased upper airway secretion	3835	88	0.002214903508710867	0.0037041195365907264	1.4093066284384557
GBRR3_HUMAN	111320	Induration	908	21	0.1150912559171506	0.12344937366437671	1.4206993782916977
GBRR3_HUMAN	111320	Infected skin ulcer	812	16	0.40728631802702286	0.3360876233907844	1.2061836310550238
GBRR3_HUMAN	111320	Infection	45111	849	6.819993542360201e-05	0.0001438482951144444	1.1510208002935773
GBRR3_HUMAN	111320	Inflammation	14946	440	7.878810166326513e-30	5.813795106593308e-29	1.8201681844612203
GBRR3_HUMAN	111320	Influenza	30418	517	0.4023871776265995	0.33297458378916167	1.0375555208340355
GBRR3_HUMAN	111320	Influenza like illness	39739	663	0.6344573002386857	0.46869825013401084	1.0181457271119527
GBRR3_HUMAN	111320	Infusion site reaction	775	17	0.20353758271948752	0.19608408871050564	1.345817685969375
GBRR3_HUMAN	111320	Inguinal hernia	2373	53	0.02849739226026842	0.03720741475804245	1.370864090165661
GBRR3_HUMAN	111320	Injection site abscess	1188	24	0.30178215175248296	0.26726061367063564	1.2372708380409778
GBRR3_HUMAN	111320	Injection site infection	1477	33	0.08024923205105867	0.09116441093597395	1.3713656345461116
GBRR3_HUMAN	111320	Injection site necrosis	1066	21	0.39623190986919493	0.3290179692472074	1.2058950703777376
GBRR3_HUMAN	111320	Injection site oedema	743	13	0.7715659845021952	0.5423023167548201	1.0686291279244335
GBRR3_HUMAN	111320	Injection site scar	889	15	0.8943879830541142	0.6080692707389094	1.029879330291546
GBRR3_HUMAN	111320	Inner ear disorder	543	16	0.025702175688410878	0.033936592615819626	1.8218637007965823
GBRR3_HUMAN	111320	International normalised ratio decreased	3164	80	0.0002513241338863452	0.0004904466524310819	1.5566183046689344
GBRR3_HUMAN	111320	International normalised ratio fluctuation	1253	31	0.025453837722554717	0.03365002268047441	1.522288629291825
GBRR3_HUMAN	111320	International normalised ratio increased	19768	635	8.516491262979547e-54	1.0123773811587235e-52	1.9915773080315171
GBRR3_HUMAN	111320	Interstitial lung disease	16232	513	5.170869223009372e-42	5.004291373545082e-41	1.9583890251210982
GBRR3_HUMAN	111320	Intestinal functional disorder	750	22	0.00911031283664522	0.013435483944021158	1.8134175607001692
GBRR3_HUMAN	111320	Intestinal obstruction	12112	334	7.669090237574976e-19	4.0086341257479234e-18	1.701693861897249
GBRR3_HUMAN	111320	Intestinal polyp	695	21	0.009818844208645271	0.014360231299390904	1.8696741076331393
GBRR3_HUMAN	111320	Intra-uterine death	3237	69	0.031565250336678466	0.040678082752147	1.3069844884798398
GBRR3_HUMAN	111320	Intracardiac thrombus	1999	54	0.0005396998795275566	0.0010014117395900225	1.6660217608376973
GBRR3_HUMAN	111320	Intracranial aneurysm	1857	40	0.08226033902723615	0.09316165257722267	1.321026651513207
GBRR3_HUMAN	111320	Intracranial pressure increased	2287	70	1.3857232480748207e-06	3.529007003883327e-06	1.8946930514881009
GBRR3_HUMAN	111320	Intracranial venous sinus thrombosis	1002	21	0.26031573545719994	0.23849188446060948	1.2845671238988134
GBRR3_HUMAN	111320	Intraventricular haemorrhage	1058	30	0.004862713140074269	0.0076030762744153275	1.751195592752551
GBRR3_HUMAN	111320	Irritable bowel syndrome	6941	212	9.349374326180648e-17	4.491931547223009e-16	1.8905660212122652
GBRR3_HUMAN	111320	Ischaemic cerebral infarction	579	13	0.2482019241068849	0.22976352104815317	1.3782672497965307
GBRR3_HUMAN	111320	Ischaemic stroke	6913	159	4.3724610795365285e-05	9.449984638383702e-05	1.4126760538278058
GBRR3_HUMAN	111320	Jaundice	14931	431	1.802744906960105e-27	1.247005830747767e-26	1.7836752388268675
GBRR3_HUMAN	111320	Jaundice neonatal	949	17	0.6999542869232739	0.5053848398952114	1.0945598776446204
GBRR3_HUMAN	111320	Jaw disorder	3398	103	9.657670938660452e-09	2.9543944401716335e-08	1.8758077303288936
GBRR3_HUMAN	111320	Joint crepitation	1634	41	0.008310766757213147	0.012360135417042305	1.5444526437190738
GBRR3_HUMAN	111320	Joint injury	8475	255	3.9974996697559952e-19	2.1121346362088425e-18	1.8615507408116538
GBRR3_HUMAN	111320	Joint range of motion decreased	3727	115	5.717601833719166e-10	1.9084503970319123e-09	1.9105421094057458
GBRR3_HUMAN	111320	Joint stiffness	9585	179	0.08327285483270513	0.09416653995524481	1.1419696768501755
GBRR3_HUMAN	111320	Joint swelling	35195	582	0.8169392410628604	0.5650238430230596	1.0089978893878797
GBRR3_HUMAN	111320	Keratitis	1072	21	0.39797684520045173	0.3301334845269456	1.199010797854173
GBRR3_HUMAN	111320	Ketoacidosis	2744	69	0.000680605346255307	0.0012424043809063097	1.5478605082258439
GBRR3_HUMAN	111320	Kidney enlargement	541	15	0.05857909772668987	0.06964635037569582	1.7112443624996412
GBRR3_HUMAN	111320	Kidney fibrosis	770	14	0.6686293816540945	0.4884358382483241	1.1112525119442114
GBRR3_HUMAN	111320	Kidney infection	6197	122	0.045080202969721095	0.05552931744955718	1.2050916129528337
GBRR3_HUMAN	111320	Laboratory test abnormal	7441	192	3.203456014615071e-09	1.0155289598422446e-08	1.589386955971525
GBRR3_HUMAN	111320	Lacrimation increased	8490	140	0.931813371086346	0.6307447100873849	1.006116046742304
GBRR3_HUMAN	111320	Lactic acidosis	8748	278	8.297590373203711e-24	5.1462160526361607e-23	1.9695540388791624
GBRR3_HUMAN	111320	Lactose intolerance	962	16	0.89872838977732	0.6106381030818127	1.0149282984353052
GBRR3_HUMAN	111320	Large intestinal haemorrhage	881	18	0.35012418660670613	0.299827338561935	1.2516076959557054
GBRR3_HUMAN	111320	Large intestine perforation	2853	57	0.1394175771341219	0.14502257840400637	1.223331627955752
GBRR3_HUMAN	111320	Laryngeal oedema	2829	70	0.0010580466587869607	0.0018712773707701986	1.5224844128847843
GBRR3_HUMAN	111320	Laryngitis	4070	83	0.0479497684129892	0.05865655099013159	1.249218399431642
GBRR3_HUMAN	111320	Leg amputation	1840	42	0.03433756903594273	0.04380943436802031	1.4017356491042667
GBRR3_HUMAN	111320	Leukocytoclastic vasculitis	2505	66	0.0002702419582256244	0.000525016110927604	1.6238228587819477
GBRR3_HUMAN	111320	Leukopenia	18517	588	1.9072115527137292e-48	2.07922209577593e-47	1.968012145644074
GBRR3_HUMAN	111320	Libido decreased	6013	132	0.0011228101280713024	0.0019761552106895837	1.3468811265326204
GBRR3_HUMAN	111320	Libido disorder	647	11	0.8761430525588909	0.5975336964405451	1.037867912098839
GBRR3_HUMAN	111320	Lichen planus	888	19	0.23255525173472302	0.21825397193849627	1.312019651616526
GBRR3_HUMAN	111320	Ligament injury	570	14	0.1339090353967631	0.14033686713197793	1.510983631348604
GBRR3_HUMAN	111320	Ligament rupture	1793	39	0.07682247461375578	0.0878707657590145	1.3342632783092987
GBRR3_HUMAN	111320	Limb deformity	693	22	0.0038567411986157245	0.00615863477540814	1.9674634637700794
GBRR3_HUMAN	111320	Limb discomfort	8452	191	2.1028984555239978e-05	4.72141476233087e-05	1.3874177954475968
GBRR3_HUMAN	111320	Limb injury	7392	199	5.904891986339271e-11	2.0984934219324175e-10	1.6601584169821348
GBRR3_HUMAN	111320	Lip and/or oral cavity cancer	608	14	0.19805251931869933	0.19216691636878397	1.4143213788380873
GBRR3_HUMAN	111320	Lip blister	1077	33	0.0010136894413122505	0.0017986411837772635	1.8967930807323612
GBRR3_HUMAN	111320	Lip haemorrhage	523	10	0.602304272286033	0.44994946093252025	1.169739486257065
GBRR3_HUMAN	111320	Lip oedema	1418	27	0.4024137212932285	0.33299084054589423	1.1647779744174411
GBRR3_HUMAN	111320	Lipase increased	3735	118	6.907316395821026e-11	2.4438567662056913e-10	1.9576723821146018
GBRR3_HUMAN	111320	Lipids increased	790	25	0.0027515185622193662	0.004520545698382796	1.961033844607432
GBRR3_HUMAN	111320	Lipodystrophy acquired	856	16	0.588222707553061	0.44293285163944274	1.1430025837140463
GBRR3_HUMAN	111320	Liver abscess	1066	23	0.1829035794177825	0.18047763833827532	1.323274803293107
GBRR3_HUMAN	111320	Liver disorder	18221	585	1.2406799771446082e-49	1.378353392777899e-48	1.990500501945886
GBRR3_HUMAN	111320	Liver function test abnormal	19990	523	1.0752677538993069e-23	6.644121112352177e-23	1.6121638384100487
GBRR3_HUMAN	111320	Liver injury	5356	126	0.00010125596754750765	0.00020895136680743886	1.445690648426083
GBRR3_HUMAN	111320	Local swelling	18318	306	0.7266040378727384	0.5204927490441511	1.0194501725164418
GBRR3_HUMAN	111320	Localised infection	8145	142	0.45770609216873626	0.3679981587728933	1.0647362566023009
GBRR3_HUMAN	111320	Localised intraabdominal fluid collection	501	15	0.03138831708189274	0.04048444768294184	1.852087519907019
GBRR3_HUMAN	111320	Localised oedema	2086	44	0.10026639492190839	0.11040046280044757	1.2930146759938526
GBRR3_HUMAN	111320	Loss of libido	2955	59	0.12766745942382868	0.13481686887545505	1.222531251054647
GBRR3_HUMAN	111320	Low density lipoprotein increased	3052	84	8.547411035260263e-06	2.0042187584863406e-05	1.6983293107071913
GBRR3_HUMAN	111320	Lower extremity mass	654	18	0.030771666562180965	0.03979481367365361	1.6983293107071913
GBRR3_HUMAN	111320	Lower gastrointestinal haemorrhage	2730	54	0.17383509883648535	0.17312576324954326	1.210916414360733
GBRR3_HUMAN	111320	Lower limb fracture	6528	125	0.08753450195624685	0.09838296829280113	1.1714750047826687
GBRR3_HUMAN	111320	Lower respiratory tract infection	10710	326	1.0037476219030287e-24	6.4074694231641435e-24	1.8839068971750672
GBRR3_HUMAN	111320	Lung adenocarcinoma	1056	29	0.007461074716336058	0.011214848953501024	1.6944707241525172
GBRR3_HUMAN	111320	Lung cancer metastatic	1473	25	0.8369676104128585	0.575894777584506	1.0360434330971586
GBRR3_HUMAN	111320	Lung disorder	17275	543	1.0891981441984667e-43	1.0892792208317699e-42	1.9474149028943446
GBRR3_HUMAN	111320	Lung infection	9369	210	1.2661345373364818e-05	2.9144825887099697e-05	1.3758711087943398
GBRR3_HUMAN	111320	Lung infection pseudomonal	767	24	0.003808133585713729	0.006086470966429506	1.9383354717088803
GBRR3_HUMAN	111320	Lung neoplasm malignant	10817	242	3.016482058488199e-06	7.418577285135961e-06	1.3732243807174427
GBRR3_HUMAN	111320	Lyme disease	1138	23	0.29255358220876815	0.26085724654869513	1.2378256680131934
GBRR3_HUMAN	111320	Lymphadenitis	929	22	0.0908619660161468	0.1015690113796008	1.4555325073756598
GBRR3_HUMAN	111320	Lymphadenopathy	14517	372	4.759761853148936e-16	2.2167135764879355e-15	1.5781435461248017
GBRR3_HUMAN	111320	Lymphocytosis	879	25	0.010582943904135576	0.015363371447001362	1.7566638069375708
GBRR3_HUMAN	111320	Lymphoma	6292	120	0.10084283286618434	0.11088341389617805	1.1667071091053938
GBRR3_HUMAN	111320	Lymphopenia	4107	121	2.591676588671671e-09	8.274206013994868e-09	1.8216066013656493
GBRR3_HUMAN	111320	Macular degeneration	4743	81	0.6887302257702927	0.499225372209506	1.042603708117542
GBRR3_HUMAN	111320	Malabsorption	2797	65	0.007103748661534712	0.01072484901121747	1.4277072902357917
GBRR3_HUMAN	111320	Malaise	162450	3568	3.5973867349370283e-65	5.032476541805159e-64	1.347586535802137
GBRR3_HUMAN	111320	Malignant neoplasm progression	23835	444	0.007282420274595502	0.010971346698738504	1.1390445139743668
GBRR3_HUMAN	111320	Malignant pleural effusion	685	13	0.5459080252760954	0.41826588811476506	1.160861999084578
GBRR3_HUMAN	111320	Mastectomy	815	20	0.07195179372155164	0.08332547374172852	1.509626053961948
GBRR3_HUMAN	111320	Maternal drugs affecting foetus	8361	244	7.519010544286007e-17	3.626743348011516e-16	1.8038515581344006
GBRR3_HUMAN	111320	Medication error	31017	710	1.397387210889659e-17	6.94838445941779e-17	1.4057947440505847
GBRR3_HUMAN	111320	Melanocytic naevus	1595	32	0.23627181051305662	0.22091592314119307	1.2285632377732552
GBRR3_HUMAN	111320	Memory impairment	47272	1332	1.118135462087872e-75	1.7829129581251757e-74	1.7398818171337234
GBRR3_HUMAN	111320	Meningioma	1147	34	0.001472146220686601	0.0025409505009897494	1.833117351239508
GBRR3_HUMAN	111320	Meningitis	2871	71	0.0008994435566370223	0.0016084312658513058	1.521622189569324
GBRR3_HUMAN	111320	Meningitis aseptic	1490	31	0.18330969343847456	0.18081729392701149	1.2750080226145373
GBRR3_HUMAN	111320	Meningitis viral	656	18	0.0428192522245064	0.053082474945831036	1.6930053943726862
GBRR3_HUMAN	111320	Meniscus lesion	1610	47	0.00024135324462546903	0.00047219424745562907	1.8044522554794682
GBRR3_HUMAN	111320	Menopausal symptoms	872	24	0.0153770564917621	0.021499076125764408	1.698329310707191
GBRR3_HUMAN	111320	Menopause	1036	33	0.0004961629067139674	0.0009258842060417286	1.9743289893166351
GBRR3_HUMAN	111320	Menstrual disorder	3551	60	0.7912982168889136	0.5515561357969585	1.031354379461256
GBRR3_HUMAN	111320	Metabolic disorder	2796	85	1.41010236394735e-07	3.9293043776554394e-07	1.8814640464123686
GBRR3_HUMAN	111320	Metamorphopsia	748	17	0.19124157550714216	0.18704735164453884	1.395526410348545
GBRR3_HUMAN	111320	Metastases to central nervous system	3934	108	5.829425350037796e-07	1.5382612043108046e-06	1.6938903945788402
GBRR3_HUMAN	111320	Metastases to liver	6157	134	0.0015238336125798313	0.0026235082898335717	1.3350528269015964
GBRR3_HUMAN	111320	Metastases to lung	3780	103	1.326187372234083e-06	3.383643791723419e-06	1.6809318660412575
GBRR3_HUMAN	111320	Metastases to lymph nodes	2355	66	4.3686526407032244e-05	9.442236775396275e-05	1.7302332689249325
GBRR3_HUMAN	111320	Metastases to meninges	577	17	0.020349331709073253	0.027583838467415592	1.8216603677942613
GBRR3_HUMAN	111320	Metastases to peritoneum	783	14	0.6726723873682392	0.49033597617460045	1.0924667087513964
GBRR3_HUMAN	111320	Metastasis	2723	51	0.3260087872978724	0.28399436828884445	1.145355321068248
GBRR3_HUMAN	111320	Metastatic malignant melanoma	785	14	0.6733828829513344	0.49069933742870436	1.089632813268254
GBRR3_HUMAN	111320	Metastatic neoplasm	1959	41	0.1290173713809231	0.13604864580940987	1.2827492499710553
GBRR3_HUMAN	111320	Metastatic renal cell carcinoma	1399	24	0.7524105367046461	0.531433434630545	1.0474060039852349
GBRR3_HUMAN	111320	Micturition disorder	1435	44	0.00014991087711159197	0.00030212715630818494	1.8981566990506447
GBRR3_HUMAN	111320	Middle insomnia	7736	221	1.7236241971078007e-14	7.454802272994317e-14	1.7646956057940413
GBRR3_HUMAN	111320	Migraine	29531	762	4.500370542592525e-32	3.5146256991714106e-31	1.5894128527748763
GBRR3_HUMAN	111320	Mobility decreased	24226	461	0.0015261362884428469	0.0026271068381702395	1.1640446047691648
GBRR3_HUMAN	111320	Mood altered	11463	292	1.2554723946272324e-12	4.92441346535213e-12	1.5685462007283437
GBRR3_HUMAN	111320	Mood swings	15616	432	4.127997843792931e-24	2.5853746095553752e-23	1.70727730496803
GBRR3_HUMAN	111320	Motion sickness	754	13	0.7741788687016703	0.5438207192213341	1.0527655376313583
GBRR3_HUMAN	111320	Mouth injury	1081	19	0.718629266841625	0.5159121412473762	1.0735829352681368
GBRR3_HUMAN	111320	Mouth ulceration	7498	195	1.211361567443384e-09	3.95563892853117e-09	1.602285218509181
GBRR3_HUMAN	111320	Movement disorder	15190	417	9.56487147713592e-23	5.732428204280254e-22	1.693845804099354
GBRR3_HUMAN	111320	Mucosal inflammation	9475	183	0.028665224496242897	0.03740433525327265	1.1818120235721803
GBRR3_HUMAN	111320	Mucous membrane disorder	1248	38	0.00046009702470027586	0.0008628131669937075	1.8845373177764646
GBRR3_HUMAN	111320	Multi-organ disorder	1296	39	0.0004025089193203164	0.0007614278814215116	1.8618120844506838
GBRR3_HUMAN	111320	Multiple myeloma	14416	242	0.6935730130056397	0.5020277917977389	1.0245412604830646
GBRR3_HUMAN	111320	Muscle atrophy	4982	159	1.6038333250538586e-14	6.947309076280271e-14	1.978273702582003
GBRR3_HUMAN	111320	Muscle disorder	4145	130	1.5022402606686654e-11	5.535705666197891e-11	1.9429620507716976
GBRR3_HUMAN	111320	Muscle fatigue	1412	26	0.5284187030344442	0.4106114523561104	1.1256843627486817
GBRR3_HUMAN	111320	Muscle haemorrhage	1762	52	7.229869028093486e-05	0.00015204928446902244	1.824793598561021
GBRR3_HUMAN	111320	Muscle injury	1534	36	0.034226864750087946	0.04368603634371811	1.442106063564451
GBRR3_HUMAN	111320	Muscle rupture	1385	29	0.20210014435887735	0.19503581532236433	1.2833491399001733
GBRR3_HUMAN	111320	Muscle spasms	74205	1730	6.508076484923102e-45	6.660676164464074e-44	1.4324002713463708
GBRR3_HUMAN	111320	Muscle strain	3396	101	3.2328008149564524e-08	9.490985032183449e-08	1.839384279254546
GBRR3_HUMAN	111320	Muscle tightness	7000	203	6.292208208361788e-14	2.647410557057687e-13	1.7921950913538982
GBRR3_HUMAN	111320	Muscular weakness	47077	1217	9.422088254849476e-51	1.0652182652317182e-49	1.5924398730909224
GBRR3_HUMAN	111320	Musculoskeletal chest pain	6502	208	1.3604688724924987e-18	7.044664209116845e-18	1.983093138569651
GBRR3_HUMAN	111320	Musculoskeletal discomfort	6198	150	4.976554062065967e-06	1.1970082995746e-05	1.4882846142109976
GBRR3_HUMAN	111320	Musculoskeletal pain	27660	651	1.0986844700684714e-18	5.709207157415675e-18	1.4463686476688074
GBRR3_HUMAN	111320	Musculoskeletal stiffness	28664	734	4.203456586654597e-30	3.1250806771247686e-29	1.5769998053498306
GBRR3_HUMAN	111320	Myalgia	68349	1347	2.6489243853939388e-11	9.616033514508972e-11	1.2063861558430804
GBRR3_HUMAN	111320	Mycosis fungoides	601	18	0.014769305845192506	0.02073249225157082	1.8527228844078452
GBRR3_HUMAN	111320	Myelitis transverse	539	13	0.17006307096748363	0.16995534763751896	1.4830784474996892
GBRR3_HUMAN	111320	Myelofibrosis	949	17	0.6999542869232739	0.5053848398952114	1.0945598776446204
GBRR3_HUMAN	111320	Myodesopsia	3073	88	1.1090567865506083e-06	2.851248040795568e-06	1.769069325547368
GBRR3_HUMAN	111320	Myopathy	3739	116	2.7041652199044687e-10	9.224742573385327e-10	1.9213043706371904
GBRR3_HUMAN	111320	Myopia	1023	31	0.001267266115405261	0.0022100971376815973	1.875238613905857
GBRR3_HUMAN	111320	Myositis	3358	94	1.1902516570217886e-06	3.0517245308293738e-06	1.7281610755602994
GBRR3_HUMAN	111320	Nail disorder	2637	56	0.05476039834818766	0.06578730582758512	1.3019866703290568
GBRR3_HUMAN	111320	Narcolepsy	676	16	0.12985713416634576	0.13680413522154336	1.4547305610906045
GBRR3_HUMAN	111320	Nasal disorder	857	22	0.04190196372736198	0.0521276370535914	1.5810395020236208
GBRR3_HUMAN	111320	Nasal dryness	2231	39	0.6761259935047712	0.49215203903750304	1.0676541013478602
GBRR3_HUMAN	111320	Nasal oedema	760	13	0.7758221592767653	0.5444031609785459	1.0443095895379337
GBRR3_HUMAN	111320	Nasal polyps	501	13	0.10850060568031121	0.11743590557022401	1.5985640643131893
GBRR3_HUMAN	111320	Nasal ulcer	655	12	0.6431015862643727	0.47351891078411434	1.1198936667804806
GBRR3_HUMAN	111320	Nausea	295487	6021	1.1461179201815535e-63	1.5701182880270545e-62	1.2481810444697108
GBRR3_HUMAN	111320	Neck pain	21538	680	5.027395759532462e-55	6.086535456836084e-54	1.9563329292641407
GBRR3_HUMAN	111320	Necrosis	2898	87	2.2784555726337385e-07	6.230760254491342e-07	1.8572267168672736
GBRR3_HUMAN	111320	Neoplasm	4162	87	0.027603841284578365	0.036145967999746155	1.2811446137702838
GBRR3_HUMAN	111320	Neoplasm progression	5605	104	0.20619576993697783	0.19810080320717188	1.134483567911051
GBRR3_HUMAN	111320	Neoplasm skin	551	11	0.4984544032006146	0.39284711369404957	1.2223777631386328
GBRR3_HUMAN	111320	Nephritis	994	26	0.02326641515556954	0.031080387898352692	1.611775337571976
GBRR3_HUMAN	111320	Nephrogenic systemic fibrosis	3056	75	0.0007832924847058787	0.001414454497594715	1.5097526579584224
GBRR3_HUMAN	111320	Nephrolithiasis	15088	348	9.84576792107963e-10	3.2345162134103933e-09	1.4167338673307748
GBRR3_HUMAN	111320	Nephropathy	2391	62	0.0006623209812855811	0.001211173416916372	1.5974553069940831
GBRR3_HUMAN	111320	Nerve compression	3279	98	4.0607180960274084e-08	1.1829734043824846e-07	1.8487105605811907
GBRR3_HUMAN	111320	Nervous system disorder	20010	445	5.613123835843466e-10	1.874638852996989e-09	1.3648555002309943
GBRR3_HUMAN	111320	Neuropathy peripheral	28887	872	8.054012355123366e-62	1.0765857165652559e-60	1.867808612615707
GBRR3_HUMAN	111320	Neurotoxicity	3809	83	0.012566619081580271	0.017958230154663142	1.3367240361068053
GBRR3_HUMAN	111320	Neutropenia	37149	1023	4.667291105479368e-54	5.5707315600585615e-53	1.6992695362016867
GBRR3_HUMAN	111320	Neutropenic infection	564	10	0.7390265908646709	0.5243676939694731	1.0831703185015782
GBRR3_HUMAN	111320	Neutropenic sepsis	3081	75	0.0010475512101314783	0.0018542127305422977	1.4971964981284287
GBRR3_HUMAN	111320	Neutrophil count decreased	12546	353	4.2632502123815104e-21	2.4181837393014332e-20	1.7372833086755155
GBRR3_HUMAN	111320	Night blindness	666	11	0.8789086327156476	0.5992174649216624	1.0077618199921552
GBRR3_HUMAN	111320	Night sweats	11368	283	3.076514754567471e-11	1.1126183853294894e-10	1.531994667346093
GBRR3_HUMAN	111320	Nipple pain	924	16	0.7947009522338435	0.5534469353875854	1.0574032712773116
GBRR3_HUMAN	111320	No therapeutic response	16711	482	1.4464360453465327e-30	1.0883219771552048e-29	1.7822219718333807
GBRR3_HUMAN	111320	Nodule	4495	104	0.0007789679378789573	0.0014073146414887298	1.4212694390978573
GBRR3_HUMAN	111320	Non-small cell lung cancer	1487	44	0.000298163290041937	0.0005755490687649007	1.8297546558416122
GBRR3_HUMAN	111320	Nonspecific reaction	1909	37	0.27986742020654987	0.2518290708868679	1.1860483540943028
GBRR3_HUMAN	111320	Nosocomial infection	1079	31	0.0035922759461324318	0.005768681744811692	1.7750350238498187
GBRR3_HUMAN	111320	Nuclear magnetic resonance imaging abnormal	2673	64	0.003647844810783078	0.005850531020458852	1.4720155926712133
GBRR3_HUMAN	111320	Obstruction	984	24	0.05798959189399218	0.06903897262886731	1.5001908911246855
GBRR3_HUMAN	111320	Ocular discomfort	1691	42	0.00938905854820035	0.013797589619750769	1.5283933881682665
GBRR3_HUMAN	111320	Ocular icterus	2208	42	0.3142174086367533	0.27563140898979915	1.1635829626451855
GBRR3_HUMAN	111320	Odynophagia	2322	69	5.54188106000213e-06	1.325942165669987e-05	1.8377837814044087
GBRR3_HUMAN	111320	Oedema	23896	713	4.381699981731944e-49	4.825612923185107e-48	1.845552526199199
GBRR3_HUMAN	111320	Oedema mouth	2975	70	0.003731718596808369	0.005974181083809165	1.4459671239756007
GBRR3_HUMAN	111320	Oedema peripheral	97172	2292	8.476078448177343e-63	1.1485111273421737e-61	1.4495942337511718
GBRR3_HUMAN	111320	Oesophageal disorder	2013	61	9.100352493690452e-06	2.1278692513349205e-05	1.8752386139058566
GBRR3_HUMAN	111320	Oesophageal pain	1958	42	0.08963458148620015	0.10041290437019389	1.3154074619464884
GBRR3_HUMAN	111320	Oesophageal spasm	933	27	0.006085903071011394	0.009321445494833143	1.788307022532738
GBRR3_HUMAN	111320	Oesophageal stenosis	1231	28	0.09048563366996201	0.10120812885798065	1.3966864489273878
GBRR3_HUMAN	111320	Oesophageal varices haemorrhage	941	16	0.797673565506181	0.555158105193293	1.037969913859242
GBRR3_HUMAN	111320	Off label use	104655	1781	0.10804738436406044	0.11701457362686743	1.038878619318026
GBRR3_HUMAN	111320	Oligohydramnios	1408	24	0.833218402298489	0.5737114609481395	1.0405948377743484
GBRR3_HUMAN	111320	Onychomadesis	1131	24	0.1964995931373793	0.19116348304537287	1.3009785505688332
GBRR3_HUMAN	111320	Opportunistic infection	851	19	0.17480306049290978	0.1739453758896459	1.3703666793927416
GBRR3_HUMAN	111320	Optic atrophy	816	23	0.012490586270086413	0.017859545743686762	1.7404484487196856
GBRR3_HUMAN	111320	Optic nerve disorder	901	16	0.6932466533181394	0.5018352781291439	1.084883808270959
GBRR3_HUMAN	111320	Optic neuropathy	776	24	0.004038112122899413	0.006425836676107243	1.9151373078187477
GBRR3_HUMAN	111320	Oral discomfort	5496	120	0.0023978093003681486	0.003982783231580579	1.3394561527898976
GBRR3_HUMAN	111320	Oral infection	1835	46	0.005595662734123149	0.008643849135083396	1.5429576521349475
GBRR3_HUMAN	111320	Oral mucosal erythema	550	17	0.016517093275889978	0.022926483871534845	1.913939598432995
GBRR3_HUMAN	111320	Oral mucosal exfoliation	714	12	0.8822959082140827	0.6011224271265274	1.0257715494869644
GBRR3_HUMAN	111320	Oral pain	8705	206	4.653647784926369e-07	1.2391068374516727e-06	1.4544738137271926
GBRR3_HUMAN	111320	Oral pruritus	773	16	0.32018917730554025	0.27990495720431385	1.26832519196803
GBRR3_HUMAN	111320	Organ failure	2658	80	5.227973558630994e-07	1.3855051844468248e-06	1.8621454040337446
GBRR3_HUMAN	111320	Organising pneumonia	1643	28	0.7709220608851926	0.5419306518969047	1.040380060718048
GBRR3_HUMAN	111320	Oropharyngeal blistering	3232	57	0.5788218260030781	0.43745624349238593	1.077302435201349
GBRR3_HUMAN	111320	Oropharyngeal pain	36951	658	0.032643119948748855	0.04188079179367052	1.0879515128096804
GBRR3_HUMAN	111320	Oropharyngeal swelling	790	18	0.15899984537210823	0.1608546533521129	1.3991417637432302
GBRR3_HUMAN	111320	Osteomalacia	631	13	0.3486038236416079	0.29882930970221994	1.2622965426939101
GBRR3_HUMAN	111320	Osteomyelitis	7645	239	8.036080514454104e-20	4.358956024810665e-19	1.9365143018028619
GBRR3_HUMAN	111320	Osteonecrosis	27254	519	0.0007467486790599664	0.0013537115179455116	1.1649135178510746
GBRR3_HUMAN	111320	Otitis media	1551	50	1.2635689829644807e-05	2.9088147827362486e-05	1.998921906894984
GBRR3_HUMAN	111320	Otorrhoea	652	21	0.004612065799594634	0.007244889935637019	1.9970845460296924
GBRR3_HUMAN	111320	Ovarian cyst	5025	101	0.045085121352512116	0.0555345661092	1.2308633631486046
GBRR3_HUMAN	111320	Oxygen supplementation	682	13	0.5445223075145529	0.4174941548849449	1.1660676582732983
GBRR3_HUMAN	111320	Packed red blood cell transfusion	525	10	0.603208285694051	0.4504196733453791	1.1651968086405324
GBRR3_HUMAN	111320	Pain	202793	5480	1.7819751557413098e-270	9.684604161505823e-269	1.666599987504782
GBRR3_HUMAN	111320	Pain in extremity	120222	2345	7.044621608294058e-17	3.402133825478794e-16	1.193768976030061
GBRR3_HUMAN	111320	Pain in jaw	11084	308	6.247595234032635e-18	3.150855324335563e-17	1.7151402912635603
GBRR3_HUMAN	111320	Painful defaecation	736	15	0.3810359292257004	0.32070338855688274	1.2484251521148562
GBRR3_HUMAN	111320	Painful respiration	1137	28	0.03480899522087334	0.04434596701957672	1.5150710532548672
GBRR3_HUMAN	111320	Palpitations	46847	1200	3.0155131301858856e-48	3.2764171495231367e-47	1.5775223513918748
GBRR3_HUMAN	111320	Pancreatic carcinoma metastatic	1519	36	0.03287349313652246	0.042141158091434705	1.456692436425858
GBRR3_HUMAN	111320	Pancreatic cyst	691	22	0.003779492228599004	0.006044639441692162	1.9733452678471202
GBRR3_HUMAN	111320	Pancreatic enzymes increased	678	16	0.13097876070343223	0.13780715516858213	1.4503356047126872
GBRR3_HUMAN	111320	Pancreatic neoplasm	539	12	0.30360985983258404	0.2683777474568677	1.3663977755974366
GBRR3_HUMAN	111320	Pancreatitis	26477	658	4.4262702020017246e-24	2.7697533998353366e-23	1.529301067214134
GBRR3_HUMAN	111320	Pancreatitis necrotising	811	16	0.4067445225228823	0.33572635064215134	1.2077008431695584
GBRR3_HUMAN	111320	Pancytopenia	22869	648	3.296255366384148e-38	2.9546521903647305e-37	1.7499189009473854
GBRR3_HUMAN	111320	Panniculitis	606	17	0.034985116695180916	0.04454766902449073	1.731969110296751
GBRR3_HUMAN	111320	Paraesthesia	66206	1549	4.081375534747195e-41	3.8782897899787156e-40	1.4376142972003885
GBRR3_HUMAN	111320	Paraesthesia oral	5403	116	0.0044505679448769075	0.007019218420686514	1.3166040731640893
GBRR3_HUMAN	111320	Paranasal sinus discomfort	721	12	0.8831891905218476	0.6016494777284705	1.015644044767065
GBRR3_HUMAN	111320	Parkinson's disease	5312	145	8.421897942642947e-09	2.588362141956296e-08	1.6839766147712747
GBRR3_HUMAN	111320	Paronychia	1233	35	0.0022333652301660583	0.003731540767121017	1.753144614002137
GBRR3_HUMAN	111320	Parosmia	3042	93	2.8490089780842263e-08	8.399383174570896e-08	1.8924076347859715
GBRR3_HUMAN	111320	Patella fracture	933	21	0.1534269368960774	0.15614389988027025	1.3817547681411577
GBRR3_HUMAN	111320	Pathogen resistance	1552	32	0.19240198982587875	0.18792376805104657	1.2633186451576301
GBRR3_HUMAN	111320	Pelvic fracture	3238	71	0.01824751437911764	0.025032456836889157	1.3452927473299992
GBRR3_HUMAN	111320	Pelvic venous thrombosis	911	28	0.0023055980988077227	0.003841364234665571	1.9028468834197596
GBRR3_HUMAN	111320	Pemphigoid	1497	42	0.0010258705926221273	0.0018187459234016606	1.7321791732573688
GBRR3_HUMAN	111320	Performance status decreased	2399	67	5.016711219422365e-05	0.00010763364491398074	1.7240615729906337
GBRR3_HUMAN	111320	Periarthritis	941	30	0.0007147073903770538	0.0012997920213353679	1.9761021617449206
GBRR3_HUMAN	111320	Pericardial effusion	8862	278	4.109859659919852e-23	2.4935371898683778e-22	1.9433973333302077
GBRR3_HUMAN	111320	Pericarditis	3392	77	0.005452297335215214	0.008442996820312285	1.3938425172440516
GBRR3_HUMAN	111320	Periorbital haematoma	916	29	0.0009758073535127839	0.0017357664959986492	1.961918189069487
GBRR3_HUMAN	111320	Periorbital oedema	2318	54	0.01369792407796756	0.019361992823019248	1.431277528634859
GBRR3_HUMAN	111320	Peripheral coldness	5754	141	5.727698373278798e-06	1.3683336807532528e-05	1.5074072021990426
GBRR3_HUMAN	111320	Peripheral embolism	743	17	0.1897032154645284	0.18597012111055816	1.4051374737806974
GBRR3_HUMAN	111320	Peripheral sensory neuropathy	2014	45	0.04277891142863	0.05303843205863659	1.371428950748824
GBRR3_HUMAN	111320	Perirectal abscess	668	16	0.12571023083586189	0.13304703912824423	1.4725800158279123
GBRR3_HUMAN	111320	Peritoneal dialysis	533	13	0.1671169711842799	0.16754974391492608	1.5001908911246855
GBRR3_HUMAN	111320	Peroneal nerve palsy	2653	80	5.05451814173697e-07	1.3414547078205504e-06	1.8657640309362589
GBRR3_HUMAN	111320	Persistent foetal circulation	535	12	0.30183518847007035	0.2672952074208899	1.3768482365962695
GBRR3_HUMAN	111320	Petechiae	4354	114	2.82490906876402e-06	6.969769100379084e-06	1.6134128451718315
GBRR3_HUMAN	111320	Pharyngeal disorder	1494	30	0.2609211864737085	0.23891961494168898	1.2296646648562997
GBRR3_HUMAN	111320	Pharyngitis	4944	158	1.9026656109249957e-14	8.213960423619443e-14	1.981029342229004
GBRR3_HUMAN	111320	Photophobia	6503	187	9.625707063082894e-13	3.799451296782021e-12	1.776666856493453
GBRR3_HUMAN	111320	Photopsia	2903	69	0.003315638273415279	0.0053608464984324835	1.4610186519068922
GBRR3_HUMAN	111320	Photosensitivity reaction	6123	146	1.4171854311296717e-05	3.243952106250624e-05	1.4658047187833636
GBRR3_HUMAN	111320	Physical disability	1777	55	1.3637609099589622e-05	3.1282035337961415e-05	1.9166201861058698
GBRR3_HUMAN	111320	Pigmentation disorder	2149	37	0.7336538018912264	0.5221750205328612	1.051270132038132
GBRR3_HUMAN	111320	Pituitary tumour	684	14	0.3651982210616005	0.3100834740061993	1.253890894074364
GBRR3_HUMAN	111320	Pituitary tumour benign	810	19	0.12513026492785062	0.13252689428654704	1.4413970635331999
GBRR3_HUMAN	111320	Placental disorder	575	12	0.407204886621911	0.3360321889859332	1.2790259817759309
GBRR3_HUMAN	111320	Platelet count decreased	39241	987	4.0813008961986706e-37	3.576652632439783e-36	1.5482704130705962
GBRR3_HUMAN	111320	Platelet disorder	807	21	0.037015007934854044	0.04676905950764395	1.6032574408966105
GBRR3_HUMAN	111320	Pleurisy	3091	93	7.928153881493665e-08	2.2549034899800816e-07	1.8614776901213577
GBRR3_HUMAN	111320	Pneumatosis intestinalis	836	18	0.22054930061965514	0.20902146113125672	1.320461420060848
GBRR3_HUMAN	111320	Pneumocystis jiroveci pneumonia	2667	62	0.007455148199086703	0.01120687126103153	1.4282047639114088
GBRR3_HUMAN	111320	Pneumonia	109688	2992	3.124746322827944e-151	9.46428856102316e-150	1.6827514232005172
GBRR3_HUMAN	111320	Pneumonia bacterial	2336	67	1.9287481076671457e-05	4.350183611464974e-05	1.7719310657620793
GBRR3_HUMAN	111320	Pneumonia cytomegaloviral	642	11	0.875583244612411	0.5972105643387373	1.0460919050631723
GBRR3_HUMAN	111320	Pneumonia fungal	945	23	0.07053424753056381	0.08192504863558225	1.4969366809487101
GBRR3_HUMAN	111320	Pneumonia legionella	665	13	0.5382060305688987	0.41449685134412934	1.1964712628601786
GBRR3_HUMAN	111320	Pneumonia pneumococcal	607	17	0.0351955451734749	0.04478411331280613	1.7290335694318413
GBRR3_HUMAN	111320	Pneumonia primary atypical	1398	30	0.13911264792179384	0.1447504003035125	1.3159569220391978
GBRR3_HUMAN	111320	Pneumonia viral	847	22	0.040307410667880066	0.05042700296931218	1.6002036171996648
GBRR3_HUMAN	111320	Pneumonitis	7289	165	6.917672071165164e-05	0.0001457981254988082	1.389845575719108
GBRR3_HUMAN	111320	Pneumoperitoneum	706	18	0.07222422158639291	0.08356318496084685	1.569967211642113
GBRR3_HUMAN	111320	Pollakiuria	16550	414	4.560150768572735e-16	2.1261927733876226e-15	1.5396108798354482
GBRR3_HUMAN	111320	Polyarthritis	1476	38	0.0074077403208906555	0.011142032951409883	1.5857372423571086
GBRR3_HUMAN	111320	Polycystic ovaries	596	14	0.19214458199323342	0.1877293266799315	1.4434826443811408
GBRR3_HUMAN	111320	Polycythaemia	781	24	0.004194169825465876	0.006652054989967888	1.902487787952045
GBRR3_HUMAN	111320	Polyhydramnios	508	10	0.48481484662850455	0.3845389496946623	1.2049726033130006
GBRR3_HUMAN	111320	Polymyalgia rheumatica	1005	18	0.7080453295751397	0.5100508535117615	1.094364175896427
GBRR3_HUMAN	111320	Polymyositis	855	19	0.17642924371847174	0.17528621762256794	1.3638099010224416
GBRR3_HUMAN	111320	Polyp	2427	77	9.74257916400834e-08	2.751595779499664e-07	1.9662076360272474
GBRR3_HUMAN	111320	Poor peripheral circulation	1987	37	0.42552774569218355	0.3484372532706521	1.1386064199305306
GBRR3_HUMAN	111320	Portal hypertension	1333	27	0.27866844465198315	0.25101327051715117	1.2405866480969836
GBRR3_HUMAN	111320	Portal vein thrombosis	1448	33	0.061597672737512627	0.0727658478004219	1.3994713613318623
GBRR3_HUMAN	111320	Post procedural haemorrhage	5579	155	1.0048650072131834e-09	3.2991247052652126e-09	1.7148199714183352
GBRR3_HUMAN	111320	Post procedural infection	3276	63	0.19120897920842192	0.18702185933475238	1.1766203067644592
GBRR3_HUMAN	111320	Postmenopausal haemorrhage	893	22	0.06305514614141133	0.07428007579618094	1.51569228954044
GBRR3_HUMAN	111320	Postoperative wound infection	2197	51	0.01470439243245486	0.020649283118277986	1.4260901294941093
GBRR3_HUMAN	111320	Pre-eclampsia	1978	62	3.06794829765814e-06	7.5401385333205765e-06	1.9417919676352922
GBRR3_HUMAN	111320	Precancerous cells present	574	12	0.4067582753822641	0.3357325084737427	1.2813018287185927
GBRR3_HUMAN	111320	Premature baby	10919	233	8.621290236518405e-05	0.00017956918383649448	1.308420279363847
GBRR3_HUMAN	111320	Premature labour	6010	113	0.14042051947597425	0.14587365805947475	1.1498834708976733
GBRR3_HUMAN	111320	Premature separation of placenta	763	13	0.8859286895683183	0.6031999278000606	1.040132351179782
GBRR3_HUMAN	111320	Presyncope	8993	258	7.941998342527584e-17	3.8268902196673096e-16	1.7724064105789072
GBRR3_HUMAN	111320	Priapism	1696	53	1.3751986444792062e-05	3.1530981911440704e-05	1.9357301820963686
GBRR3_HUMAN	111320	Procedural site reaction	590	15	0.100873406155373	0.11090728725447069	1.56541658204315
GBRR3_HUMAN	111320	Proctalgia	2737	80	1.679221909600032e-06	4.241116490392347e-06	1.8067786419266068
GBRR3_HUMAN	111320	Proctitis	907	18	0.4300036332238818	0.35137314676160525	1.215002746467687
GBRR3_HUMAN	111320	Product contamination	1336	31	0.06540325088330708	0.07668164583006921	1.4254687394594714
GBRR3_HUMAN	111320	Product counterfeit	895	17	0.5089274551049532	0.3987307448847274	1.1618790500737886
GBRR3_HUMAN	111320	Product formulation issue	1878	36	0.3177093395524791	0.2781558677892886	1.1727876673287445
GBRR3_HUMAN	111320	Product packaging quantity issue	1192	21	0.7311857645439019	0.5215162650887304	1.0761403488853423
GBRR3_HUMAN	111320	Product solubility abnormal	904	15	0.8956419628800364	0.6088246385384539	1.0125022887230721
GBRR3_HUMAN	111320	Product tampering	641	11	0.875480134549814	0.5971518874376142	1.0477523684045422
GBRR3_HUMAN	111320	Productive cough	12507	329	8.863299910350301e-16	4.076774742234845e-15	1.6211621060273333
GBRR3_HUMAN	111320	Progressive multifocal leukoencephalopathy	3438	73	0.03116608496070082	0.040239795919134326	1.301800119490069
GBRR3_HUMAN	111320	Progressive multiple sclerosis	632	19	0.011489334155301796	0.01655185683850688	1.859943029779382
GBRR3_HUMAN	111320	Prostate cancer metastatic	1124	27	0.05834392920474908	0.06940287444263941	1.4769427187006934
GBRR3_HUMAN	111320	Prostatic disorder	1391	38	0.00288026857971126	0.004715717632066459	1.685358576873261
GBRR3_HUMAN	111320	Protein urine present	1944	60	6.198253182474244e-06	1.4753937090363227e-05	1.9110711988849496
GBRR3_HUMAN	111320	Proteinuria	6021	128	0.004387823268396337	0.006929834289924888	1.3034069849920908
GBRR3_HUMAN	111320	Pruritus	108673	1791	0.8096802099581412	0.5609910948359591	1.0055357818919226
GBRR3_HUMAN	111320	Pseudomembranous colitis	1225	33	0.006521525502598564	0.009923786216870093	1.6612852150038466
GBRR3_HUMAN	111320	Pulmonary embolism	50503	1339	2.2405293539594086e-61	2.976446662759814e-60	1.6343304883377707
GBRR3_HUMAN	111320	Pulmonary fibrosis	6826	220	7.05813738557558e-20	3.836585213881427e-19	1.9984377598996719
GBRR3_HUMAN	111320	Pulmonary function test decreased	1309	24	0.5848362761520378	0.440965893885883	1.1207651793616327
GBRR3_HUMAN	111320	Pulmonary haemorrhage	3812	118	2.553304229744284e-10	8.723054069089347e-10	1.916865459152278
GBRR3_HUMAN	111320	Pulmonary thrombosis	3352	74	0.011753273212716745	0.016892935700960756	1.3546568144383984
GBRR3_HUMAN	111320	Pulmonary valve stenosis	575	14	0.13654620522310001	0.14252246864601376	1.4975167540638572
GBRR3_HUMAN	111320	Purulence	1316	38	0.0010208326265078258	0.0018103493353474624	1.7842645966428188
GBRR3_HUMAN	111320	Pyoderma gangrenosum	790	13	0.888851089804015	0.6049503804361446	1.0039887559650404
GBRR3_HUMAN	111320	Pyrexia	138114	3921	5.60704448118747e-228	2.5385716833718787e-226	1.7533696941270833
GBRR3_HUMAN	111320	Pyuria	508	15	0.03271402714690253	0.04196087839793237	1.8257901311862297
GBRR3_HUMAN	111320	Radiation skin injury	587	10	0.8699601681320045	0.5940282937812661	1.039993685355068
GBRR3_HUMAN	111320	Rash erythematous	15632	360	5.881613832673659e-10	1.9613481957988513e-09	1.4145330560630873
GBRR3_HUMAN	111320	Rash generalised	18360	302	0.9304392859801107	0.6299037588680078	1.003561079011308
GBRR3_HUMAN	111320	Rash macular	11322	219	0.01596997972701534	0.02224100489818118	1.1836145371748399
GBRR3_HUMAN	111320	Rash morbilliform	1027	33	0.0003207806222624961	0.0006163510537710368	1.9922052075297638
GBRR3_HUMAN	111320	Rash papular	9768	179	0.1297808797056238	0.13674492890897783	1.120175907858249
GBRR3_HUMAN	111320	Rash pustular	3924	93	0.000655326563272579	0.0011994495505419564	1.45672412294018
GBRR3_HUMAN	111320	Rash vesicular	1488	41	0.0019913814450221515	0.003358868540847698	1.7002854605697888
GBRR3_HUMAN	111320	Raynaud's phenomenon	1929	54	0.00021385063763777653	0.00042150331085137263	1.7282199065756378
GBRR3_HUMAN	111320	Reaction to drug excipients	1848	40	0.0809589474376668	0.09186899895615616	1.3276025585174207
GBRR3_HUMAN	111320	Rebound effect	1103	24	0.15437240717630177	0.15694302619410497	1.334738883669785
GBRR3_HUMAN	111320	Rectal cancer	1350	34	0.017520793215384772	0.024162615421204774	1.550349249186605
GBRR3_HUMAN	111320	Rectal haemorrhage	18439	528	1.5477879475255584e-32	1.2224972507805072e-31	1.7689705555554331
GBRR3_HUMAN	111320	Recurrent cancer	943	19	0.3667072329071428	0.31114355919258485	1.233923243782209
GBRR3_HUMAN	111320	Red blood cell sedimentation rate increased	4024	113	1.0423826349317854e-07	2.936783933197556e-07	1.7337925921461466
GBRR3_HUMAN	111320	Renal cancer	2919	48	0.9418726279293146	0.6330520235558572	1.0032624559245547
GBRR3_HUMAN	111320	Renal colic	1100	33	0.0011803509012204363	0.0020687536062697492	1.8559062570614668
GBRR3_HUMAN	111320	Renal disorder	17267	394	2.7270244681184295e-10	9.300656911260654e-10	1.4012332391468647
GBRR3_HUMAN	111320	Renal function test abnormal	1347	26	0.38924039695682666	0.3250745451384972	1.1810738279861264
GBRR3_HUMAN	111320	Renal haemorrhage	961	24	0.041571622786432914	0.05177119085755918	1.5370152139591229
GBRR3_HUMAN	111320	Renal pain	3850	110	5.538282204846444e-08	1.5958275048897613e-07	1.7649304601466889
GBRR3_HUMAN	111320	Renal tubular acidosis	666	12	0.6479675804359257	0.4765033926239605	1.1010575347704115
GBRR3_HUMAN	111320	Respiratory disorder	12363	363	1.0951542206593396e-24	6.978882539207543e-24	1.8152309782608693
GBRR3_HUMAN	111320	Respiratory tract infection	7684	190	7.868400576475305e-08	2.2385806430545055e-07	1.5214105647915146
GBRR3_HUMAN	111320	Retching	8274	164	0.017067742126391654	0.023607446389005485	1.2134713003425324
GBRR3_HUMAN	111320	Retinal haemorrhage	3485	63	0.42287095264710806	0.34658399597157363	1.1047577573448883
GBRR3_HUMAN	111320	Retinal tear	980	18	0.6131798330615346	0.45619343972695636	1.122803993357353
GBRR3_HUMAN	111320	Retinal vein occlusion	1260	26	0.22198534148364285	0.2101545373428309	1.2643424041893623
GBRR3_HUMAN	111320	Retinopathy	1622	32	0.28112973722404566	0.25272325532896783	1.2077008431695584
GBRR3_HUMAN	111320	Retroperitoneal haemorrhage	1387	34	0.025372077261212333	0.03355526597240323	1.507952410886602
GBRR3_HUMAN	111320	Reversible posterior leukoencephalopathy syndrome	854	22	0.0413829608543693	0.05157267006177314	1.586740365612648
GBRR3_HUMAN	111320	Rhinorrhoea	18504	304	0.9537650654734025	0.6330520235558572	1.0023253426415482
GBRR3_HUMAN	111320	Right ventricular failure	3256	97	5.4314517682122497e-08	1.5662691453415485e-07	1.8425896351895472
GBRR3_HUMAN	111320	Rosacea	1447	32	0.09616846346536358	0.10661988347056721	1.3570631382611997
GBRR3_HUMAN	111320	Sarcoidosis	1852	36	0.3126231093723941	0.2745200806201826	1.1895786801869754
GBRR3_HUMAN	111320	Scab	3565	89	0.0001588317096822446	0.0003189317444901402	1.5364440657088265
GBRR3_HUMAN	111320	Scar	7688	218	5.727510499426645e-14	2.4150695394481783e-13	1.7512268501482275
GBRR3_HUMAN	111320	Scleroderma	1492	26	0.6839644637154852	0.4965466795205537	1.0642554752862707
GBRR3_HUMAN	111320	Scratch	2755	46	0.8805423477345509	0.6001238389757165	1.0189557916830645
GBRR3_HUMAN	111320	Seasonal allergy	2932	56	0.24397186625903056	0.2265384306033326	1.1684379680526062
GBRR3_HUMAN	111320	Secondary progressive multiple sclerosis	814	18	0.210830528784871	0.20157376386494383	1.3569565849369016
GBRR3_HUMAN	111320	Sensation of foreign body	2917	50	0.7152941191128083	0.5142519502163624	1.046523119026638
GBRR3_HUMAN	111320	Sensation of heaviness	4127	89	0.011747176734805855	0.016884967861960764	1.3226051442307778
GBRR3_HUMAN	111320	Sensation of pressure	984	27	0.011206589628206759	0.016187472912208005	1.693005394372686
GBRR3_HUMAN	111320	Sensitivity of teeth	1241	33	0.009476892822218943	0.013909063432717106	1.6392814373216764
GBRR3_HUMAN	111320	Sepsis	43866	1291	3.6301219849999314e-84	6.3518704462496604e-83	1.8196091043494718
GBRR3_HUMAN	111320	Serum ferritin increased	2210	60	0.00021259217892808052	0.0004191964705429655	1.6746316924182534
GBRR3_HUMAN	111320	Sexual dysfunction	5067	91	0.3755226656445093	0.3170335662749018	1.0974065200349388
GBRR3_HUMAN	111320	Silent myocardial infarction	531	10	0.6061623286187988	0.4520722730761227	1.1517780354124265
GBRR3_HUMAN	111320	Sinus disorder	6786	158	2.4279936227545734e-05	5.4104074866854824e-05	1.4304777356529894
GBRR3_HUMAN	111320	Sinus headache	3620	60	0.8958060726786795	0.6089255782404943	1.011364645702035
GBRR3_HUMAN	111320	Sinus operation	868	26	0.004389624263547236	0.006932451856952606	1.8529673714604191
GBRR3_HUMAN	111320	Sinusitis	36408	631	0.1593251376154545	0.1611330875020287	1.058356432679852
GBRR3_HUMAN	111320	Sjogren's syndrome	1553	40	0.006584829108742273	0.010011113760861431	1.5864543461992708
GBRR3_HUMAN	111320	Skin atrophy	1875	45	0.013621493560990067	0.019266987740509136	1.4755975978275595
GBRR3_HUMAN	111320	Skin burning sensation	8792	151	0.5561369056492499	0.42421049320578613	1.0486231897226133
GBRR3_HUMAN	111320	Skin cancer	4517	91	0.052712947538060044	0.0636649700810758	1.2337765123574007
GBRR3_HUMAN	111320	Skin discolouration	16643	384	1.26474101389619e-10	4.402827746826024e-10	1.417241656170439
GBRR3_HUMAN	111320	Skin disorder	10589	224	0.00019941973772281247	0.0003947806466578684	1.2968365059794678
GBRR3_HUMAN	111320	Skin exfoliation	16611	299	0.10483855454120702	0.11421247487450162	1.0999437872640534
GBRR3_HUMAN	111320	Skin haemorrhage	3112	53	0.7772915901561633	0.5446429585645446	1.0396877048657513
GBRR3_HUMAN	111320	Skin hypertrophy	1147	31	0.0072873278587906095	0.010978218150711806	1.666878767916317
GBRR3_HUMAN	111320	Skin infection	3263	54	0.9449479204308832	0.6330520235558572	1.0097888204516425
GBRR3_HUMAN	111320	Skin injury	1031	25	0.06373384575667604	0.07497374166860815	1.491243430541437
GBRR3_HUMAN	111320	Skin lesion	9503	268	1.4400659183864638e-16	6.864084140144645e-16	1.7414235357722394
GBRR3_HUMAN	111320	Skin necrosis	2363	56	0.007352007723452377	0.01106629983939367	1.4566222783351952
GBRR3_HUMAN	111320	Skin papilloma	1472	32	0.1218655076557488	0.1295997831117115	1.333503014333054
GBRR3_HUMAN	111320	Skin striae	544	13	0.17285303636676486	0.17228141715508175	1.4691134903669238
GBRR3_HUMAN	111320	Skin tightness	1627	40	0.014074601038253138	0.019840397066323276	1.5124797894136717
GBRR3_HUMAN	111320	Skin ulcer	9489	251	1.1094264820060805e-12	4.364436683027419e-12	1.6304304553898943
GBRR3_HUMAN	111320	Skin warm	2256	39	0.7395958281493589	0.5246260920960343	1.055614700114799
GBRR3_HUMAN	111320	Sleep disorder due to general medical condition, insomnia type	988	20	0.31552108164118076	0.2765832879307857	1.2398271827476741
GBRR3_HUMAN	111320	Sleep terror	1092	24	0.1509013528974133	0.1540486635749756	1.3484861942693802
GBRR3_HUMAN	111320	Small intestinal obstruction	4702	109	0.0005436577466680385	0.0010080876106176198	1.4240871511656061
GBRR3_HUMAN	111320	Social problem	2336	58	0.002456244002958511	0.004072816866414756	1.5278502490822081
GBRR3_HUMAN	111320	Soft tissue infection	704	12	0.8812297289281776	0.6004865450590531	1.0405948377743484
GBRR3_HUMAN	111320	Spinal cord injury	533	16	0.023876511404139267	0.031793577509166976	1.8571028439454524
GBRR3_HUMAN	111320	Spinal fracture	6526	162	5.868426737643968e-07	1.5481216542762226e-06	1.5275356653815153
GBRR3_HUMAN	111320	Spinal fusion surgery	1524	46	0.00011080001598347498	0.00022736071203532474	1.8676260078954137
GBRR3_HUMAN	111320	Spinal operation	1387	36	0.00791222447305132	0.011825995716769745	1.5990191585636917
GBRR3_HUMAN	111320	Splenic infarction	750	18	0.11095990823665002	0.11965991086728725	1.4755975978275597
GBRR3_HUMAN	111320	Splenic rupture	743	15	0.38449246842968765	0.3223441606370367	1.2364210641137516
GBRR3_HUMAN	111320	Splenomegaly	4718	144	7.980300027267068e-12	2.987684700585335e-11	1.8891778602707017
GBRR3_HUMAN	111320	Spondylitis	957	21	0.20006785235660257	0.1935447594141273	1.346325158701641
GBRR3_HUMAN	111320	Sputum discoloured	2447	76	2.6881514494518274e-07	7.307704079857674e-07	1.9234838924584752
GBRR3_HUMAN	111320	Squamous cell carcinoma	3445	69	0.09329000809206152	0.10394093378347585	1.226459377815205
GBRR3_HUMAN	111320	Squamous cell carcinoma of skin	1820	33	0.5181963108114638	0.40431683079449243	1.108143243583987
GBRR3_HUMAN	111320	Staphylococcal bacteraemia	1577	47	0.00013922209226934363	0.00028185381906086176	1.843371813930986
GBRR3_HUMAN	111320	Staphylococcal infection	16605	498	2.2876475069645338e-35	1.9286713253890347e-34	1.8553301391447035
GBRR3_HUMAN	111320	Staphylococcal skin infection	542	9	0.8657254383297189	0.5917357789544214	1.0132621403468796
GBRR3_HUMAN	111320	Stem cell transplant	1540	26	0.840656251537703	0.57765612084358	1.0305142184740244
GBRR3_HUMAN	111320	Stent occlusion	587	18	0.013051381797520384	0.018560517046789	1.8983083332333457
GBRR3_HUMAN	111320	Stevens-Johnson syndrome	12452	348	2.326236707731773e-20	1.286145394813268e-19	1.7252691014917072
GBRR3_HUMAN	111320	Stomatitis	18604	363	0.0010787644857799678	0.0019050791023945857	1.1941654371542367
GBRR3_HUMAN	111320	Stress fracture	3247	60	0.333064541869285	0.28885554204922237	1.1297327074676011
GBRR3_HUMAN	111320	Subclavian vein thrombosis	627	15	0.15278074967147404	0.1556071647666344	1.470775383455574
GBRR3_HUMAN	111320	Subcutaneous abscess	1942	59	1.4197798877778376e-05	3.249722075263014e-05	1.8802180048084216
GBRR3_HUMAN	111320	Subdural haemorrhage	1128	34	0.0009009369985942726	0.001610903000830335	1.8649539414347098
GBRR3_HUMAN	111320	Sudden cardiac death	2455	53	0.04659176578948729	0.057176499028951486	1.3240652327994726
GBRR3_HUMAN	111320	Sudden hearing loss	821	20	0.07394941566143101	0.08516779327875737	1.4983179936326447
GBRR3_HUMAN	111320	Suffocation feeling	990	30	0.0015755949621603788	0.0027048644836333304	1.8752386139058568
GBRR3_HUMAN	111320	Surgery	17928	310	0.3458696988808181	0.2970711800628174	1.0558728033798446
GBRR3_HUMAN	111320	Swelling	28461	532	0.002545111057280931	0.0042081120221761715	1.14304350900975
GBRR3_HUMAN	111320	Swelling face	26244	469	0.060696852325833536	0.07182597517192203	1.0918945147429333
GBRR3_HUMAN	111320	Swollen tongue	14345	281	0.003370666702485715	0.0054423622898909455	1.1989580216326412
GBRR3_HUMAN	111320	Syncope	43174	1211	6.3697078448614395e-68	9.244205426488587e-67	1.7317457466358406
GBRR3_HUMAN	111320	Synovitis	1571	32	0.2313283640005947	0.21739576951561743	1.2477221186742025
GBRR3_HUMAN	111320	Systemic candida	686	13	0.5463872960426139	0.41855084956178656	1.1591370926966367
GBRR3_HUMAN	111320	Systemic lupus erythematosus	7417	136	0.18449438232823562	0.18179642247146657	1.1208677994394025
GBRR3_HUMAN	111320	Temperature intolerance	3141	97	8.985815742446483e-09	2.75556821948403e-08	1.912201267267996
GBRR3_HUMAN	111320	Temperature regulation disorder	503	15	0.03173928204527021	0.040870404497545705	1.8444969972844492
GBRR3_HUMAN	111320	Tendonitis	7067	142	0.01672433069483703	0.023185123393794856	1.230481481817793
GBRR3_HUMAN	111320	Terminal state	2386	43	0.5182079428520878	0.4043231058433328	1.1012925022340843
GBRR3_HUMAN	111320	Testicular pain	1393	33	0.04367466489631863	0.0539960669361559	1.4560676296210184
GBRR3_HUMAN	111320	Testicular swelling	556	15	0.06276204209007571	0.07398009928409612	1.663797661136435
GBRR3_HUMAN	111320	Tetany	859	24	0.014347150742618456	0.020193486776824577	1.72477036584395
GBRR3_HUMAN	111320	Therapeutic product ineffective	1310	22	0.828095572536333	0.5707831134823392	1.0249751430044436
GBRR3_HUMAN	111320	Therapeutic response delayed	1263	28	0.1188572113455964	0.1268779960633772	1.3604970024774476
GBRR3_HUMAN	111320	Therapeutic response increased	550	14	0.09321420126996356	0.10386720281181516	1.5673636175929548
GBRR3_HUMAN	111320	Therapeutic response unexpected	15805	276	0.28622625916162947	0.2563047607408684	1.0665276217410349
GBRR3_HUMAN	111320	Therapy cessation	6207	146	3.125993792264369e-05	6.877192140169908e-05	1.4454899858386676
GBRR3_HUMAN	111320	Thermal burn	3302	83	0.00020248780162442754	0.0004004953506294401	1.5472611862485106
GBRR3_HUMAN	111320	Thirst	6518	209	9.351021806846051e-19	4.871253045726975e-18	1.9878896576006295
GBRR3_HUMAN	111320	Throat cancer	794	16	0.3988750023785262	0.3307234641859036	1.234090193213109
GBRR3_HUMAN	111320	Throat tightness	11047	190	0.49955843639703434	0.39353213661456987	1.0501474415167735
GBRR3_HUMAN	111320	Thrombocytopenic purpura	803	19	0.1230848900429637	0.13069145079281183	1.454266680171889
GBRR3_HUMAN	111320	Thrombosis	33862	571	0.4923513833982436	0.3891146959541218	1.0292379307707133
GBRR3_HUMAN	111320	Thrombosis in device	2827	65	0.009249877944742683	0.013614688964654663	1.412199969921862
GBRR3_HUMAN	111320	Thrombotic microangiopathy	2500	50	0.1556681686924664	0.15804085064325102	1.2246456254079066
GBRR3_HUMAN	111320	Thyroid cancer	3276	78	0.0014963712357274762	0.0025795571530404853	1.4636008693899372
GBRR3_HUMAN	111320	Thyroid disorder	5668	142	1.7270629828697357e-06	4.3562480993016005e-06	1.5419985996359418
GBRR3_HUMAN	111320	Thyroid function test abnormal	2113	51	0.007660785558675536	0.01148783486215016	1.4841849747305327
GBRR3_HUMAN	111320	Thyroid neoplasm	2329	72	7.263249980290822e-07	1.8998670270636096e-06	1.9142887755600775
GBRR3_HUMAN	111320	Tic	2738	47	0.706713792524846	0.5092812936240962	1.0480709309975507
GBRR3_HUMAN	111320	Tinea pedis	759	18	0.11439516261393001	0.12283100414020173	1.4576753597972654
GBRR3_HUMAN	111320	Tinnitus	17613	487	5.3237615094562614e-27	3.631587857759744e-26	1.7063948709044072
GBRR3_HUMAN	111320	Toe amputation	1191	21	0.7310627661039237	0.5214983826469127	1.0770601269613127
GBRR3_HUMAN	111320	Tongue blistering	1019	17	0.9015005379668926	0.6122926385118723	1.0180936187273315
GBRR3_HUMAN	111320	Tongue discolouration	2459	56	0.016821728135848694	0.023304021038750407	1.3984301273904685
GBRR3_HUMAN	111320	Tongue disorder	3962	117	4.227102846567553e-09	1.3280995907741066e-08	1.8259800703416198
GBRR3_HUMAN	111320	Tongue dry	599	19	0.008629377494092106	0.012792117969216883	1.9657673745771742
GBRR3_HUMAN	111320	Tongue neoplasm malignant stage unspecified	620	14	0.2055689173898068	0.19762085921777142	1.3863150149006995
GBRR3_HUMAN	111320	Tongue ulceration	1497	47	3.7915816350632444e-05	8.258701211149232e-05	1.9450750864237303
GBRR3_HUMAN	111320	Tonsillar disorder	632	11	0.7539899491927866	0.5323469627906761	1.0629371853379415
GBRR3_HUMAN	111320	Tonsillar hypertrophy	598	12	0.420811561619111	0.3451869237211518	1.2288253033103227
GBRR3_HUMAN	111320	Tonsillitis	1732	32	0.44966036482423544	0.3637504961212084	1.129555494493881
GBRR3_HUMAN	111320	Tooth abscess	4453	137	1.5472251646323032e-11	5.6970004896296297e-11	1.9047836152370892
GBRR3_HUMAN	111320	Tooth discolouration	1596	31	0.3235678858379065	0.2822881763882762	1.1886496517537444
GBRR3_HUMAN	111320	Tooth disorder	8675	175	0.006737374098305112	0.01022050056299554	1.2354513221026824
GBRR3_HUMAN	111320	Tooth infection	4462	93	0.024735070864090068	0.03279904363907021	1.277342667654802
GBRR3_HUMAN	111320	Tooth injury	723	16	0.237524994626787	0.2218288415808722	1.358022871739461
GBRR3_HUMAN	111320	Toothache	7274	185	1.5337080114966967e-08	4.617935236956574e-08	1.566005444254856
GBRR3_HUMAN	111320	Total lung capacity decreased	516	15	0.034564214104083765	0.044067625681905524	1.7966357977541143
GBRR3_HUMAN	111320	Tracheostomy	606	18	0.015511424053625359	0.021668500267868467	1.8369684381118598
GBRR3_HUMAN	111320	Transfusion reaction	522	13	0.12063336585302624	0.12850121921749022	1.5326115194201109
GBRR3_HUMAN	111320	Transient ischaemic attack	18520	435	7.22543858992747e-13	2.871980116073545e-12	1.4433686207116134
GBRR3_HUMAN	111320	Transposition of the great vessels	529	10	0.6051379247750314	0.45147844678298055	1.1562164864159428
GBRR3_HUMAN	111320	Traumatic lung injury	1110	31	0.005992962274019397	0.0091948600409085	1.724037724740139
GBRR3_HUMAN	111320	Treatment failure	5725	106	0.21099915585745221	0.20170267604561765	1.132018042065967
GBRR3_HUMAN	111320	Trigeminal neuralgia	1751	39	0.05901380770654739	0.07009633556024589	1.3669963727538024
GBRR3_HUMAN	111320	Trigger finger	1245	40	7.981444920539037e-05	0.00016688364998002127	1.9919547102070516
GBRR3_HUMAN	111320	Tubulointerstitial nephritis	5255	137	2.8841253941975737e-07	7.818484016052444e-07	1.6063005242991943
GBRR3_HUMAN	111320	Tumour haemorrhage	925	28	0.0025250762634392993	0.004177702877444809	1.8731480468892394
GBRR3_HUMAN	111320	Tumour marker increased	878	16	0.5955484940577894	0.4468386777587426	1.1138308240368895
GBRR3_HUMAN	111320	Tunnel vision	723	18	0.07743993272421032	0.08844906159032007	1.5321098462549982
GBRR3_HUMAN	111320	Tympanic membrane perforation	586	18	0.012948445566052805	0.0184336562531245	1.90165042536932
GBRR3_HUMAN	111320	Type I hypersensitivity	553	13	0.17862160880029315	0.17698581684844183	1.444628265527475
GBRR3_HUMAN	111320	Ulcer	6653	168	1.2313421735424688e-07	3.4482433236891554e-07	1.5545540151669832
GBRR3_HUMAN	111320	Ulcer haemorrhage	3287	58	0.5365488554295385	0.4136789282338232	1.0778701974014464
GBRR3_HUMAN	111320	Umbilical hernia	1855	38	0.1690598098460013	0.1691403059005438	1.2549753189375465
GBRR3_HUMAN	111320	Underweight	525	16	0.022728708454311443	0.030441559265325494	1.886291100824752
GBRR3_HUMAN	111320	Upper gastrointestinal haemorrhage	5754	154	1.2336938068583839e-08	3.742602457005469e-08	1.6502099802371542
GBRR3_HUMAN	111320	Upper limb fracture	8116	179	0.00011599579185130568	0.00023738908148546439	1.3533283079819516
GBRR3_HUMAN	111320	Upper respiratory tract congestion	1376	23	0.9151677718822224	0.6204986000813921	1.0200854544232896
GBRR3_HUMAN	111320	Upper respiratory tract infection	16567	387	2.6573261359518954e-11	9.645600668734118e-11	1.4352877005321467
GBRR3_HUMAN	111320	Ureteric obstruction	666	15	0.21850734872752153	0.20742151755580768	1.3826644157831203
GBRR3_HUMAN	111320	Urinary bladder haemorrhage	858	20	0.13608283707538826	0.14213950818230148	1.4321631418851415
GBRR3_HUMAN	111320	Urinary tract infection	56606	1688	2.8846792425224675e-114	6.670005405489534e-113	1.8444387808867542
GBRR3_HUMAN	111320	Urinary tract obstruction	708	20	0.024406239055306245	0.032408706393879265	1.7444080129356812
GBRR3_HUMAN	111320	Urine abnormality	1246	32	0.013750476396146735	0.019428202802877704	1.5817498687311349
GBRR3_HUMAN	111320	Urine ketone body present	590	17	0.03227821159853173	0.04146714538117652	1.7803312495022448
GBRR3_HUMAN	111320	Urine odour abnormal	2323	57	0.004037883981438456	0.006425524066621255	1.5094595021025077
GBRR3_HUMAN	111320	Urine output increased	1237	29	0.056261165136282036	0.06729704619137569	1.4405806570402608
GBRR3_HUMAN	111320	Uterine cancer	1460	31	0.14787825821932934	0.15157015053383807	1.3017751609479427
GBRR3_HUMAN	111320	Uterine disorder	1450	30	0.2126354422062527	0.20290008811472607	1.2677669502462132
GBRR3_HUMAN	111320	Uterine haemorrhage	1773	35	0.26077744977451833	0.238826397147469	1.208439152804695
GBRR3_HUMAN	111320	Uterine leiomyoma	3614	64	0.5121213480891349	0.4006865045181372	1.0818277975434354
GBRR3_HUMAN	111320	Uterine polyp	855	15	0.7864944252035799	0.54885043566002	1.0715649222319181
GBRR3_HUMAN	111320	Uterine prolapse	544	12	0.3061417067299805	0.27006291026548435	1.353555691240318
GBRR3_HUMAN	111320	VIIth nerve paralysis	3678	114	4.3770161962120156e-10	1.4722680279582747e-09	1.9194361569945473
GBRR3_HUMAN	111320	VIth nerve paralysis	571	11	0.510458734397356	0.39964689998506764	1.1787214144551101
GBRR3_HUMAN	111320	Vaginal infection	1987	48	0.01001491367383242	0.014620999094898257	1.48549072251645
GBRR3_HUMAN	111320	Vaginitis bacterial	950	19	0.36906739163929486	0.3127497076777913	1.2246456254079066
GBRR3_HUMAN	111320	Varicella	1066	20	0.5445560192264635	0.4175136867233705	1.1473735304968915
GBRR3_HUMAN	111320	Varicose vein	2319	64	0.00010640500521102064	0.00021887560797027264	1.703099193471927
GBRR3_HUMAN	111320	Vascular injury	816	26	0.0020200094961819078	0.003403146668593992	1.9749348440122443
GBRR3_HUMAN	111320	Vascular occlusion	1086	23	0.22948795416844317	0.21597293162925413	1.298377817342155
GBRR3_HUMAN	111320	Vasculitis	4978	115	0.0004179556567237207	0.0007885032552558719	1.4190578036548538
GBRR3_HUMAN	111320	Vasodilatation	1125	35	0.0005501558656476659	0.0010190414820162445	1.92685068584822
GBRR3_HUMAN	111320	Vein disorder	2308	41	0.566050575005769	0.4301741199301468	1.0852726340734382
GBRR3_HUMAN	111320	Venous occlusion	974	27	0.010691266748021424	0.015506612950916787	1.7108829592551853
GBRR3_HUMAN	111320	Venous thrombosis	2102	57	0.00038513424197724464	0.000730989530590649	1.6725844654104072
GBRR3_HUMAN	111320	Venous thrombosis limb	1078	29	0.011068880739654655	0.016005528015283217	1.6589336832265351
GBRR3_HUMAN	111320	Ventricular septal defect	3221	87	1.1117681351778373e-05	2.5737667670969996e-05	1.6658150290727205
GBRR3_HUMAN	111320	Vertigo	22504	719	5.985772196541079e-60	7.791837585151047e-59	1.9805136575049784
GBRR3_HUMAN	111320	Viral infection	12101	230	0.026223236432683157	0.03453005339479382	1.1626447812608127
GBRR3_HUMAN	111320	Viral upper respiratory tract infection	722	23	0.0029267167302409773	0.004785959930804638	1.9745001714373545
GBRR3_HUMAN	111320	Vision blurred	53458	1323	6.330720347638705e-46	6.602272492584905e-45	1.522779360474122
GBRR3_HUMAN	111320	Visual acuity reduced	23129	544	9.24186945864169e-16	4.2472791361194615e-15	1.4453909139195555
GBRR3_HUMAN	111320	Visual field defect	3836	77	0.07477271200951426	0.08595788196141606	1.2292066891896865
GBRR3_HUMAN	111320	Visual impairment	40156	867	3.965128286010222e-15	1.77011523391556e-14	1.3242032147472345
GBRR3_HUMAN	111320	Vitamin B12 decreased	869	24	0.015110461934516237	0.02116425975226825	1.7043588822244946
GBRR3_HUMAN	111320	Vitamin D decreased	3362	79	0.002151834316253097	0.003607637711851196	1.4439851404063377
GBRR3_HUMAN	111320	Vitreous detachment	880	23	0.03204795804575669	0.04120763689449166	1.6104733020241664
GBRR3_HUMAN	111320	Vocal cord paralysis	754	22	0.009464484029619146	0.01389378008465134	1.8035081751225728
GBRR3_HUMAN	111320	Volvulus	730	22	0.007703062603073792	0.011544315910461265	1.8646440454657107
GBRR3_HUMAN	111320	Vomiting	181294	4477	9.35421253611376e-153	2.8641126096642705e-151	1.5193911489427412
GBRR3_HUMAN	111320	Vomiting projectile	981	23	0.09960774397961564	0.1098034478524847	1.4406843630842492
GBRR3_HUMAN	111320	Vulvovaginal dryness	1271	31	0.0345625765460998	0.0440657595576377	1.5001908911246855
GBRR3_HUMAN	111320	Vulvovaginal mycotic infection	2102	42	0.196604351405479	0.19123302985346355	1.2234566490725591
GBRR3_HUMAN	111320	Walking aid user	2725	86	2.4898853778769516e-08	7.373840903057356e-08	1.9555349243914053
GBRR3_HUMAN	111320	Weight bearing difficulty	1081	18	0.904390620431685	0.6140247737787703	1.0161217700938605
GBRR3_HUMAN	111320	Weight decreased	99424	2651	2.69525218279918e-123	6.705029813905235e-122	1.6438494424566943
GBRR3_HUMAN	111320	Weight fluctuation	2389	67	3.5699949303187414e-05	7.79956020973934e-05	1.7314864720991203
GBRR3_HUMAN	111320	Weight increased	80879	2143	2.0395989674337753e-97	4.065424373919252e-96	1.6332600486081086
GBRR3_HUMAN	111320	Weight loss poor	1221	21	0.8209796020711964	0.5673468393576915	1.0501336237872798
GBRR3_HUMAN	111320	Wheelchair user	1864	57	1.4293184252962826e-05	3.270572616232664e-05	1.8928805931180315
GBRR3_HUMAN	111320	Wheezing	16488	446	4.966088524408449e-23	3.004505650805329e-22	1.6683334682498687
GBRR3_HUMAN	111320	White blood cell count decreased	36790	946	5.1856971674272596e-39	4.72762478495699e-38	1.5837301450775052
GBRR3_HUMAN	111320	White blood cell disorder	900	23	0.03542612561299323	0.045046753565210214	1.5737464308263522
GBRR3_HUMAN	111320	Wound	6570	197	6.108428530476293e-15	2.702012705108328e-14	1.8549355440236188
GBRR3_HUMAN	111320	Wound infection	3315	94	7.019195225658633e-07	1.838676293172764e-06	1.7512318381337526
GBRR3_HUMAN	111320	Wound secretion	2010	63	2.3920303977578393e-06	5.947269532567882e-06	1.941695452303137
GBRR3_HUMAN	111320	Wrist fracture	4937	132	1.1935650519851242e-07	3.346200431766841e-07	1.6484928002369075
GBRR3_HUMAN	111320	Wrong technique in drug usage process	37400	666	0.032013149720661604	0.04116930278478089	1.0879589845799973
GBRR3_HUMAN	111320	Yawning	993	30	0.0016228521995808392	0.002777990045328647	1.8693967490650287
GBRR3_HUMAN	111320	Yellow skin	2016	35	0.7250856781966412	0.5195931418783145	1.0602055767665624
A9UF02_HUMAN	29221	Abdominal discomfort	52559	233	0.6394714842915443	0.47153032871763306	1.0304526628196513
A9UF02_HUMAN	29221	Abdominal distension	38929	238	2.2650759763632982e-07	6.195475438212545e-07	1.423497353939744
A9UF02_HUMAN	29221	Abdominal pain	91875	587	1.0043766983897611e-19	5.427729305257725e-19	1.4880381667324958
A9UF02_HUMAN	29221	Abdominal pain upper	74481	321	0.9551155222252021	0.6330520235558572	1.0016707060212604
A9UF02_HUMAN	29221	Abdominal tenderness	2415	20	0.007065077293429006	0.01067172573144672	1.9324761362531409
A9UF02_HUMAN	29221	Abnormal faeces	2564	19	0.022645764151364472	0.03034185306511273	1.727648852263245
A9UF02_HUMAN	29221	Abortion	1424	10	0.14862324473278712	0.15215774112389718	1.6365913530149478
A9UF02_HUMAN	29221	Abortion induced	5978	49	3.997713603211151e-05	8.680758079214652e-05	1.9125125398042446
A9UF02_HUMAN	29221	Abortion spontaneous	17913	97	0.02568254912644853	0.033914476988649654	1.2599438526988336
A9UF02_HUMAN	29221	Abscess	6343	34	0.21049093906593602	0.20131841482686363	1.2471194466246096
A9UF02_HUMAN	29221	Abscess oral	586	3	0.7442117082887199	0.5270682220504219	1.190809694595096
A9UF02_HUMAN	29221	Accident at work	915	6	0.3005372339682194	0.266459320582079	1.5274852628139513
A9UF02_HUMAN	29221	Actinic keratosis	936	8	0.07003722669516256	0.08141688497637832	1.9949484251406346
A9UF02_HUMAN	29221	Activated partial thromboplastin time prolonged	3499	25	0.018713027864955933	0.0255878201658014	1.665328276599839
A9UF02_HUMAN	29221	Acute coronary syndrome	4446	25	0.16887385225751253	0.16898844895122886	1.3086067479999641
A9UF02_HUMAN	29221	Acute prerenal failure	1168	8	0.17486235016552318	0.17399276083461399	1.5959587401125077
A9UF02_HUMAN	29221	Acute pulmonary oedema	2866	21	0.02090192522782701	0.028264896221728873	1.7081526761485362
A9UF02_HUMAN	29221	Acute respiratory failure	5893	36	0.04526486638820308	0.055731930959926304	1.4223842621456873
A9UF02_HUMAN	29221	Adhesion	892	4	0.7968015715530599	0.5546515111898559	1.0424054834068182
A9UF02_HUMAN	29221	Adrenal disorder	686	4	0.5477348305098881	0.4193251804323448	1.3572669637320447
A9UF02_HUMAN	29221	Agranulocytosis	6011	48	9.979320310997265e-05	0.00020610860730078476	1.8627994015064653
A9UF02_HUMAN	29221	Alanine aminotransferase increased	32156	235	5.410057951158144e-14	2.283795896984765e-13	1.7036525819784374
A9UF02_HUMAN	29221	Altered state of consciousness	7348	38	0.24577695643434574	0.22792017740837348	1.202973003833094
A9UF02_HUMAN	29221	Amyloidosis	658	4	0.3734954999305255	0.3157604603001512	1.415376252699166
A9UF02_HUMAN	29221	Anaemia haemolytic autoimmune	896	6	0.29454854565388333	0.2622798790124962	1.5600944987616647
A9UF02_HUMAN	29221	Anaemia of chronic disease	576	3	0.7419853391492831	0.5258334655065418	1.211591713697977
A9UF02_HUMAN	29221	Anal fistula	1773	10	0.3605203844597836	0.30686267516010424	1.3126149592530552
A9UF02_HUMAN	29221	Angiopathy	3584	17	0.6102295713153496	0.45445709788194655	1.1028983163379118
A9UF02_HUMAN	29221	Anticonvulsant drug level below therapeutic	603	3	0.7482872506216933	0.5291564785710847	1.157070086581568
A9UF02_HUMAN	29221	Antinuclear antibody increased	512	4	0.18088603765544078	0.1788172088848094	1.8221576166638869
A9UF02_HUMAN	29221	Anuria	4352	34	0.0015408079259307862	0.0026501486797330556	1.8221576166638869
A9UF02_HUMAN	29221	Aortic aneurysm	2655	13	0.5541668734812963	0.42308821619478737	1.138676088233186
A9UF02_HUMAN	29221	Aortic arteriosclerosis	1523	10	0.1677896030270905	0.1681180386638194	1.5295044105506517
A9UF02_HUMAN	29221	Aortic dissection	957	8	0.07416765274752231	0.08538130742888567	1.95080309644943
A9UF02_HUMAN	29221	Aortic valve disease	820	6	0.1748265828871541	0.17396502605658867	1.705754427392975
A9UF02_HUMAN	29221	Aortic valve incompetence	2613	19	0.03388841800356069	0.04329706537851721	1.6950140050154043
A9UF02_HUMAN	29221	Aortic valve sclerosis	584	4	0.32552160938743674	0.2836599202414705	1.5959587401125077
A9UF02_HUMAN	29221	Aortic valve stenosis	784	5	0.39990475061448905	0.3313872704854566	1.485327453891615
A9UF02_HUMAN	29221	Apgar score low	846	4	0.7886502986845683	0.5500644711423629	1.0993540015026775
A9UF02_HUMAN	29221	Aphagia	5268	28	0.24629781148283025	0.22832674478202566	1.236563451308546
A9UF02_HUMAN	29221	Aphasia	13508	64	0.4293083771863072	0.35095184432889126	1.101643640898845
A9UF02_HUMAN	29221	Aplasia pure red cell	1773	8	0.8546272790180132	0.5853849469535034	1.0489020614903735
A9UF02_HUMAN	29221	Apparent death	1865	9	0.720706948454872	0.5170968601453817	1.122158489141607
A9UF02_HUMAN	29221	Appendicectomy	1658	8	0.7046102686448699	0.5080535166157751	1.122007356685157
A9UF02_HUMAN	29221	Appendicitis	3209	21	0.05805179963055812	0.06910410634405631	1.5243708794361936
A9UF02_HUMAN	29221	Appetite disorder	1826	9	0.5914976618395877	0.44489890157862455	1.1462444446047455
A9UF02_HUMAN	29221	Areflexia	1468	11	0.06975801359329871	0.08113342771591786	1.7471202405486956
A9UF02_HUMAN	29221	Arrhythmia supraventricular	668	4	0.3806476257108244	0.3204506973335573	1.3940603452789977
A9UF02_HUMAN	29221	Arterial disorder	1167	8	0.174550141295379	0.17373445621617692	1.5973357536932777
A9UF02_HUMAN	29221	Arterial thrombosis	1081	6	0.47961596437974546	0.3812954437617891	1.291613119905006
A9UF02_HUMAN	29221	Aspartate aminotransferase increased	29202	232	1.2864686803157876e-17	6.406530447546345e-17	1.8532292722604333
A9UF02_HUMAN	29221	Asterixis	586	5	0.11125381100151258	0.11992557244746882	1.9915147789699965
A9UF02_HUMAN	29221	Asthenia	144412	706	0.0007403101429420554	0.0013429378449990148	1.13689265740691
A9UF02_HUMAN	29221	Asthenopia	1656	8	0.7043857898538687	0.5079270821482043	1.1233690160986098
A9UF02_HUMAN	29221	Atrial fibrillation	37254	176	0.21829951779521933	0.20725644704275134	1.0984645085406763
A9UF02_HUMAN	29221	Atrial flutter	3608	22	0.09810435707261796	0.10841816058888691	1.4197178976460956
A9UF02_HUMAN	29221	Atrial tachycardia	845	5	0.421913528453172	0.34592430793421197	1.377464388787581
A9UF02_HUMAN	29221	Azotaemia	1961	14	0.07974963281886856	0.09067103140598046	1.663993961185614
A9UF02_HUMAN	29221	B-cell lymphoma	1511	9	0.3193934703536372	0.27934709788123624	1.3866352568886968
A9UF02_HUMAN	29221	BK virus infection	573	3	0.7413438904140688	0.5254740233633471	1.2179685121911243
A9UF02_HUMAN	29221	Bacteraemia	3883	22	0.21724338552354494	0.20644670001796042	1.318598389266744
A9UF02_HUMAN	29221	Barrett's oesophagus	1750	8	0.8535152965294802	0.5847521644797844	1.0627509406030478
A9UF02_HUMAN	29221	Basal cell carcinoma	5070	23	0.7471717602988441	0.528556797354766	1.0545913212354294
A9UF02_HUMAN	29221	Benign prostatic hyperplasia	2723	13	0.6590023339620854	0.4831572914612661	1.1101041421077775
A9UF02_HUMAN	29221	Bile duct cancer	853	7	0.10402408821586574	0.11356480526327382	1.9147731929245806
A9UF02_HUMAN	29221	Biliary tract disorder	759	4	0.5744040081544963	0.43483918484863254	1.2260345288281516
A9UF02_HUMAN	29221	Bladder cancer	10861	52	0.4193875592688898	0.34420738955243113	1.1132878990145534
A9UF02_HUMAN	29221	Bladder operation	508	3	0.4854280400013859	0.3849271322606442	1.374736736532556
A9UF02_HUMAN	29221	Blindness	14544	100	1.0923959368301215e-05	2.5309773337145363e-05	1.6021463397695488
A9UF02_HUMAN	29221	Blister	18906	113	0.0008161888364566618	0.0014694319155514036	1.3914640534637066
A9UF02_HUMAN	29221	Blood calcium decreased	4800	24	0.4387732315712787	0.356856396460998	1.162884509127204
A9UF02_HUMAN	29221	Blood chloride decreased	1838	8	0.8586171168919207	0.5877596879243896	1.011645977339076
A9UF02_HUMAN	29221	Blood chloride increased	875	7	0.11015948527240846	0.11891969215218814	1.8662420751315614
A9UF02_HUMAN	29221	Blood cholesterol decreased	551	3	0.5157728668401842	0.40291997301121674	1.2668650583009868
A9UF02_HUMAN	29221	Blood creatine increased	2130	15	0.06534875985147823	0.07662644311125338	1.6412341653639262
A9UF02_HUMAN	29221	Blood creatine phosphokinase increased	16978	141	1.5809838284131893e-12	6.167705074209338e-12	1.9379566693354056
A9UF02_HUMAN	29221	Blood creatinine decreased	1069	8	0.1504854395375881	0.15370332376159399	1.744874777125833
A9UF02_HUMAN	29221	Blood culture positive	2591	14	0.36548089792547334	0.3102850894121991	1.2571968344696898
A9UF02_HUMAN	29221	Blood iron increased	772	5	0.3964564404142086	0.3291569597738071	1.5085659538221228
A9UF02_HUMAN	29221	Blood magnesium decreased	2833	13	0.7729029383992325	0.5430791084291497	1.0668022074865522
A9UF02_HUMAN	29221	Blood phosphorus increased	1033	7	0.22501380420986053	0.21251373820096908	1.5788480713588646
A9UF02_HUMAN	29221	Blood potassium abnormal	866	4	0.7920179337500854	0.5519655748807476	1.0738469481035435
A9UF02_HUMAN	29221	Blood potassium decreased	12821	74	0.014772111111136084	0.020735935015113338	1.3434249063628467
A9UF02_HUMAN	29221	Blood potassium increased	7111	33	0.6496117948336946	0.47753028465252484	1.0789294393103064
A9UF02_HUMAN	29221	Blood pressure diastolic decreased	2498	11	0.8779305772344671	0.5986178839673706	1.023544105540591
A9UF02_HUMAN	29221	Blood sodium decreased	8731	41	0.5660763566056694	0.4301869405314723	1.0918267790528031
A9UF02_HUMAN	29221	Blood sodium increased	1340	7	0.528773290623597	0.41076324770148576	1.2152273977600865
A9UF02_HUMAN	29221	Blood test abnormal	3465	27	0.003886665030540426	0.006202705842614032	1.8173875705469658
A9UF02_HUMAN	29221	Blood thyroid stimulating hormone decreased	1426	10	0.14890373891106934	0.152386425776007	1.6342797833072995
A9UF02_HUMAN	29221	Blood thyroid stimulating hormone increased	2804	18	0.10886813100209326	0.11776994723005713	1.495137226020691
A9UF02_HUMAN	29221	Blood urea decreased	757	6	0.14979125139634622	0.1531342655629699	1.848847009184929
A9UF02_HUMAN	29221	Body temperature increased	9141	46	0.29743213876427155	0.26435383155587944	1.1704282349148352
A9UF02_HUMAN	29221	Bone neoplasm malignant	1178	10	0.040265938043738875	0.05038189541452626	1.9812843948314522
A9UF02_HUMAN	29221	Bowel movement irregularity	1721	12	0.09492378662176837	0.10547710633043154	1.6249082550004466
A9UF02_HUMAN	29221	Brain abscess	804	6	0.16782658169864748	0.16815076863591913	1.7399550174158918
A9UF02_HUMAN	29221	Brain neoplasm	3290	25	0.007196848853560473	0.010853816750370204	1.7719296884863218
A9UF02_HUMAN	29221	Brain oedema	5564	44	0.00019268805015528042	0.0003823659865563607	1.8446044858546737
A9UF02_HUMAN	29221	Breast cancer in situ	1331	6	0.8324970964579761	0.5733055360899434	1.0479125312436843
A9UF02_HUMAN	29221	Breast cancer recurrent	1269	8	0.27557327483212246	0.24916245902415812	1.4681301653691587
A9UF02_HUMAN	29221	Breast mass	3177	17	0.34112553809630336	0.2942432588088063	1.2449488273345986
A9UF02_HUMAN	29221	Breast swelling	1349	7	0.5311450395969111	0.41118840400533496	1.207077586597761
A9UF02_HUMAN	29221	Breech presentation	656	3	0.7629262903109595	0.5373737769331727	1.0631578130917931
A9UF02_HUMAN	29221	Bronchial disorder	626	3	0.7543177765959257	0.5325339079058611	1.114353213401189
A9UF02_HUMAN	29221	Bronchiectasis	1650	11	0.13248930992831512	0.1391416918947098	1.5531142101766013
A9UF02_HUMAN	29221	Bronchiolitis	1361	9	0.20606161077516102	0.19799292672026955	1.5404779259222061
A9UF02_HUMAN	29221	Bronchitis chronic	1150	5	0.8224903309214568	0.5682204106358292	1.0105415603332473
A9UF02_HUMAN	29221	Bronchopneumonia	3737	25	0.032597842138156675	0.0418286298835699	1.5585534571411208
A9UF02_HUMAN	29221	Bundle branch block	573	4	0.3193226214498798	0.27929573464370133	1.6268120725224158
A9UF02_HUMAN	29221	Bundle branch block left	2317	15	0.11095867632159857	0.11965883694425215	1.5079106254321042
A9UF02_HUMAN	29221	Caesarean section	8370	43	0.2411918172684006	0.22448032106583188	1.195004532797104
A9UF02_HUMAN	29221	Calcinosis	1239	9	0.12177179103268103	0.12951438468899634	1.693273297436441
A9UF02_HUMAN	29221	Calculus bladder	503	3	0.48207244050485015	0.3828202379988844	1.3884841038978817
A9UF02_HUMAN	29221	Candidiasis	4547	22	0.569407308278654	0.43215847162719767	1.1251068245213036
A9UF02_HUMAN	29221	Capillary leak syndrome	659	5	0.21580678864376754	0.20532787137433667	1.7692203158739574
A9UF02_HUMAN	29221	Carbon dioxide decreased	511	4	0.18003840986754457	0.17814048334268529	1.8257516159077998
A9UF02_HUMAN	29221	Cardiac death	780	4	0.5834843964648007	0.44016002999939696	1.1928557593624414
A9UF02_HUMAN	29221	Cardiac pacemaker insertion	2899	21	0.02209574023965459	0.02969143518197969	1.6885664918841508
A9UF02_HUMAN	29221	Cardiac tamponade	1843	15	0.0190461048414109	0.025994001222128773	1.8989115206480875
A9UF02_HUMAN	29221	Cardiac valve disease	2957	17	0.20662336673044335	0.19842548589641942	1.33810826339365
A9UF02_HUMAN	29221	Cardiomegaly	8134	64	8.617073418765153e-06	2.0197965316957733e-05	1.8352536689273942
A9UF02_HUMAN	29221	Cardiomyopathy	7484	64	5.559946145072951e-07	1.4698065678215973e-06	1.9960238690355891
A9UF02_HUMAN	29221	Cardiopulmonary failure	2204	17	0.021390300580075503	0.028853027879156164	1.7988286668392004
A9UF02_HUMAN	29221	Cardiovascular insufficiency	757	6	0.14979125139634622	0.1531342655629699	1.848847009184929
A9UF02_HUMAN	29221	Cardioversion	653	4	0.3699688899360888	0.3133754174566937	1.426280538159098
A9UF02_HUMAN	29221	Cataract operation	2902	22	0.014456059139526968	0.02033254653229221	1.767745965610729
A9UF02_HUMAN	29221	Catheterisation cardiac	1933	11	0.29874786825222865	0.2652609772745389	1.3244298597707855
A9UF02_HUMAN	29221	Cell death	666	5	0.21886816165549694	0.20769906579201672	1.7504842459630379
A9UF02_HUMAN	29221	Central venous catheterisation	1106	6	0.4875957208189333	0.3862686478243741	1.2622582762708014
A9UF02_HUMAN	29221	Cerebellar syndrome	1172	7	0.3643131030607976	0.3094670412735561	1.390470490312614
A9UF02_HUMAN	29221	Cerebral artery embolism	686	3	0.7721906528939125	0.5426621230754715	1.0164598125167508
A9UF02_HUMAN	29221	Cerebral disorder	1738	12	0.09790078398209599	0.10822657480252584	1.60890394426174
A9UF02_HUMAN	29221	Cerebral infarction	11214	60	0.09612745034232792	0.10658158400253497	1.2448306472098634
A9UF02_HUMAN	29221	Cerebral ischaemia	3168	20	0.10028560771356426	0.11041646055474753	1.4702288266601882
A9UF02_HUMAN	29221	Cerebral ventricle dilatation	676	5	0.22343059432060486	0.21127002563100938	1.724396552282516
A9UF02_HUMAN	29221	Cerumen impaction	675	4	0.5445281893438227	0.41749708577182726	1.3795172418260127
A9UF02_HUMAN	29221	Cervix carcinoma	1033	5	0.6368167460042818	0.4701384056939691	1.1255545589314864
A9UF02_HUMAN	29221	Cheilitis	2775	18	0.08115086520166023	0.09206024159269435	1.5108640956451378
A9UF02_HUMAN	29221	Chest injury	530	3	0.5006550179657203	0.39422748949886777	1.3173473471516903
A9UF02_HUMAN	29221	Cholecystitis	5998	26	0.9212929479114568	0.6242657773139157	1.0074957217388067
A9UF02_HUMAN	29221	Cholelithiasis	17633	80	0.6041832270189199	0.45095268850599174	1.0546984210850048
A9UF02_HUMAN	29221	Cholestasis	6764	49	0.0007384834839935187	0.0013398855890238944	1.6886503125092134
A9UF02_HUMAN	29221	Chorioretinopathy	594	3	0.7460859205999992	0.5280529984579101	1.1746904432300183
A9UF02_HUMAN	29221	Chronic fatigue syndrome	573	3	0.7413438904140688	0.5254740233633471	1.2179685121911243
A9UF02_HUMAN	29221	Circulatory collapse	8680	54	0.008554680618752811	0.012691985347809572	1.4486850145004562
A9UF02_HUMAN	29221	Clostridium difficile colitis	4052	24	0.11740074150316111	0.12555447511327064	1.3788322779522162
A9UF02_HUMAN	29221	Collapse of lung	965	6	0.31935376677911964	0.2793176740836268	1.4478457809154137
A9UF02_HUMAN	29221	Colon adenoma	689	5	0.22968123475131952	0.2161266408048662	1.6916229335987838
A9UF02_HUMAN	29221	Colonoscopy	702	4	0.552818984171438	0.42230362884849	1.3261548270275854
A9UF02_HUMAN	29221	Coma	19846	87	0.8280402818472858	0.5707543371484549	1.0189290706270198
A9UF02_HUMAN	29221	Coma hepatic	549	4	0.3068446034358937	0.27054026066240366	1.698451503238999
A9UF02_HUMAN	29221	Compression fracture	2054	9	0.8657676418054105	0.5917562468548679	1.0184479979691063
A9UF02_HUMAN	29221	Conjunctivitis	4542	36	0.0008661929149104163	0.0015527616413028857	1.8488470091849292
A9UF02_HUMAN	29221	Continuous haemodiafiltration	988	5	0.6231228126659117	0.4618749681672688	1.1770804543047488
A9UF02_HUMAN	29221	Costochondritis	779	4	0.5830404928112246	0.43989816249967123	1.1943949280841992
A9UF02_HUMAN	29221	Creatinine renal clearance decreased	2045	15	0.04219604527820363	0.05242959604225779	1.7099557929776867
A9UF02_HUMAN	29221	Cushingoid	1044	8	0.09655499567616499	0.10697475112348458	1.7869808286974027
A9UF02_HUMAN	29221	Cutaneous vasculitis	602	4	0.3362504539484894	0.291108033216784	1.5479198482696563
A9UF02_HUMAN	29221	Cyst	4777	22	0.739137147906575	0.5244172622994951	1.0706852536191167
A9UF02_HUMAN	29221	Cystitis haemorrhagic	1503	10	0.1630786328408813	0.16423446870333278	1.5499934180597028
A9UF02_HUMAN	29221	Cytomegalovirus viraemia	808	4	0.7831225731296858	0.5470807630052927	1.151313518986635
A9UF02_HUMAN	29221	Deafness	8932	50	0.07421385618022772	0.08542460181603843	1.3027134503282687
A9UF02_HUMAN	29221	Deafness neurosensory	1272	9	0.12983580751931675	0.1367887490139396	1.6490310022540164
A9UF02_HUMAN	29221	Deafness unilateral	2393	11	0.7539587206123566	0.5323293631634912	1.0686625484800376
A9UF02_HUMAN	29221	Decreased appetite	86284	482	2.7585733675110148e-08	8.140291183611778e-08	1.2999878364893962
A9UF02_HUMAN	29221	Dehydration	59381	269	0.39510320826942	0.3283426880161023	1.0530919383219712
A9UF02_HUMAN	29221	Dementia	7944	43	0.1435585054582491	0.14813902928505585	1.2594358618657746
A9UF02_HUMAN	29221	Dementia Alzheimer's type	3683	19	0.37879377070201425	0.3191989307341651	1.200018102895731
A9UF02_HUMAN	29221	Demyelination	1977	10	0.6025916850559947	0.4500971714481079	1.1764820402456206
A9UF02_HUMAN	29221	Dental operation	786	5	0.40050993955621156	0.3317846248279926	1.481523798439908
A9UF02_HUMAN	29221	Depressed level of consciousness	17751	81	0.5659475604861817	0.4301090530500224	1.0608112848116245
A9UF02_HUMAN	29221	Dermal cyst	963	5	0.6164067644790363	0.45806419419887145	1.207797585158213
A9UF02_HUMAN	29221	Dermatitis	5373	34	0.02814777778782211	0.03679376509684684	1.4736985556760933
A9UF02_HUMAN	29221	Dermatitis allergic	3746	19	0.4519168178528474	0.365032534721059	1.1797333858357817
A9UF02_HUMAN	29221	Dermatitis bullous	3031	22	0.017902694463218943	0.02462954813766917	1.6919602462475571
A9UF02_HUMAN	29221	Dermatitis psoriasiform	643	4	0.36302168909061167	0.30857431184395084	1.4486010473634656
A9UF02_HUMAN	29221	Diabetic complication	1638	9	0.4449310645194324	0.3607526039525429	1.2785304824105725
A9UF02_HUMAN	29221	Dialysis	7528	46	0.02150117871591667	0.028987431381392318	1.4227539156041735
A9UF02_HUMAN	29221	Diarrhoea	196036	1367	8.409619018897499e-64	1.1541145089709137e-62	1.6250299825416512
A9UF02_HUMAN	29221	Diarrhoea haemorrhagic	3496	16	0.7949686437099204	0.5536025561519627	1.0639724934083385
A9UF02_HUMAN	29221	Dilatation atrial	1193	6	0.6536325565862259	0.4799833634061652	1.1697422947749634
A9UF02_HUMAN	29221	Diplegia	998	7	0.21488192544008758	0.20460557414882677	1.6346096076833454
A9UF02_HUMAN	29221	Disease progression	40262	330	1.727451085469713e-26	1.1609624011167682e-25	1.91241675133686
A9UF02_HUMAN	29221	Disease recurrence	9187	74	8.609530670999334e-07	2.23603913112183e-06	1.8791437815655885
A9UF02_HUMAN	29221	Diverticulitis	9249	50	0.11105468762117283	0.11974174088697014	1.2578215964578412
A9UF02_HUMAN	29221	Diverticulum	4210	20	0.6362192722527769	0.46977428855528025	1.104601514636342
A9UF02_HUMAN	29221	Diverticulum intestinal	1701	8	0.7100267125289874	0.5111911240374335	1.0935098278384576
A9UF02_HUMAN	29221	Drug eruption	6922	43	0.021006049498370087	0.02839221675754778	1.4465478622767094
A9UF02_HUMAN	29221	Drug exposure during pregnancy	37554	239	1.1177568591490072e-08	3.402234291489948e-08	1.4821908117003606
A9UF02_HUMAN	29221	Drug interaction	62757	277	0.6679083193175835	0.48803675922862444	1.0259552304196364
A9UF02_HUMAN	29221	Drug level decreased	2547	17	0.09213827941823291	0.10282236520099716	1.554955847579973
A9UF02_HUMAN	29221	Drug level increased	6259	53	6.800011507292883e-06	1.6119256775613395e-05	1.976304047335582
A9UF02_HUMAN	29221	Drug toxicity	15104	66	0.9008331904914196	0.6118861156509093	1.0156486994864142
A9UF02_HUMAN	29221	Dry skin	18694	108	0.002977822601027265	0.004863279213038505	1.3447064387260235
A9UF02_HUMAN	29221	Duodenal ulcer	3359	16	0.6907636062960896	0.5003890632802022	1.107575314705659
A9UF02_HUMAN	29221	Duodenitis	1534	11	0.11178145592141216	0.12041509639418711	1.6714078729346356
A9UF02_HUMAN	29221	Dysaesthesia	1230	7	0.38301213897206055	0.32156708086007424	1.3245283084335202
A9UF02_HUMAN	29221	Dysentery	591	3	0.7453737326594576	0.5276947000863201	1.1806837618179267
A9UF02_HUMAN	29221	Dyspnoea	211378	1006	0.0013366446702532133	0.002323262777028976	1.1066230364317091
A9UF02_HUMAN	29221	Ear disorder	1755	8	0.8537428017566098	0.5848771994321135	1.059709295094739
A9UF02_HUMAN	29221	Early satiety	995	6	0.3325322244613784	0.28848396325787223	1.4039273042445721
A9UF02_HUMAN	29221	Eating disorder	7614	47	0.01752467104180143	0.02416714134857077	1.4373541448218234
A9UF02_HUMAN	29221	Ecchymosis	3426	23	0.0363369723476191	0.04604572335814102	1.5640677044593632
A9UF02_HUMAN	29221	Eczema	7102	43	0.029038320529011757	0.037839645124987796	1.409661813939862
A9UF02_HUMAN	29221	Electrocardiogram QT prolonged	12063	90	1.3045364268542386e-06	3.330649959735187e-06	1.739519047729744
A9UF02_HUMAN	29221	Electrocardiogram ST segment depression	1344	7	0.529817420193645	0.4108091373751417	1.211591713697977
A9UF02_HUMAN	29221	Electrocardiogram ST segment elevation	1869	10	0.4751049697798157	0.37838516514732734	1.2448306472098634
A9UF02_HUMAN	29221	Electrocardiogram T wave abnormal	978	7	0.2100222114143061	0.2009516360248166	1.6682781886860918
A9UF02_HUMAN	29221	Electrocardiogram abnormal	4115	24	0.15029616018578956	0.15354449538292358	1.3575987327283126
A9UF02_HUMAN	29221	Electrolyte imbalance	4148	33	0.0011652512484856582	0.0020444522536756343	1.8558110744686145
A9UF02_HUMAN	29221	Empyema	760	5	0.2694027882321963	0.24497665282794476	1.5325431610351894
A9UF02_HUMAN	29221	Encephalitis	2405	20	0.0069188028418471215	0.010470218187464369	1.9405787615623782
A9UF02_HUMAN	29221	Endocarditis	2032	9	0.8646124947330418	0.5910700282212759	1.0295235570177077
A9UF02_HUMAN	29221	Endometrial cancer	1139	8	0.16633046564857182	0.1669010111094633	1.6368807590897516
A9UF02_HUMAN	29221	Enteritis	1716	13	0.06013303225065722	0.07124896550248651	1.7665192161550656
A9UF02_HUMAN	29221	Enteritis infectious	631	3	0.7556987057629405	0.5333409412709101	1.1054809744409886
A9UF02_HUMAN	29221	Enterobacter infection	679	3	0.7699801443255756	0.5413991657380324	1.0269852839481373
A9UF02_HUMAN	29221	Enterocolitis haemorrhagic	719	4	0.5587250800990657	0.42572790657141957	1.2946238730982582
A9UF02_HUMAN	29221	Eosinophilic pneumonia	1057	7	0.2330819432814375	0.21861169420115356	1.5427601154420907
A9UF02_HUMAN	29221	Epicondylitis	680	3	0.7702942618511307	0.541564814906741	1.025468318979233
A9UF02_HUMAN	29221	Epigastric discomfort	1440	10	0.1509949343649024	0.15412541685014833	1.6182798413728225
A9UF02_HUMAN	29221	Epstein-Barr virus infection	1993	10	0.6043189401718798	0.4510290769051021	1.166989497308692
A9UF02_HUMAN	29221	Erosive oesophagitis	1070	6	0.47636447479981087	0.3791651521138495	1.3049662630619188
A9UF02_HUMAN	29221	Essential hypertension	1165	8	0.1739295026236878	0.17320701972360317	1.6000969218068357
A9UF02_HUMAN	29221	Exercise tolerance decreased	1990	10	0.6039812131774911	0.45084041335131747	1.1687576632137053
A9UF02_HUMAN	29221	Eye infection	3146	17	0.33751585122076205	0.29199546063852916	1.257282932047725
A9UF02_HUMAN	29221	Eye inflammation	2041	10	0.61055754766589	0.45465292168224586	1.139409243310259
A9UF02_HUMAN	29221	Eye operation	1149	9	0.07110185740402412	0.08250388000754143	1.8269527682866864
A9UF02_HUMAN	29221	Facial palsy	2915	15	0.4763300247365052	0.3791407217432738	1.1969690550843808
A9UF02_HUMAN	29221	Faeces discoloured	9398	54	0.03968980399690351	0.04974206111371395	1.3373669665112304
A9UF02_HUMAN	29221	Failure to thrive	2898	15	0.4747904796838163	0.3782012534826427	1.2040271452461686
A9UF02_HUMAN	29221	Fatigue	241583	1119	0.012396683738148789	0.0177378461761647	1.076885876376318
A9UF02_HUMAN	29221	Fear of death	1055	5	0.8107033733391711	0.5615464808712366	1.101971511030065
A9UF02_HUMAN	29221	Febrile convulsion	611	3	0.7503216572973783	0.5302670241113451	1.141845480179179
A9UF02_HUMAN	29221	Febrile neutropenia	21024	148	2.498313004919552e-08	7.397783728400195e-08	1.6406052195255036
A9UF02_HUMAN	29221	Feeding disorder	3037	22	0.024762464014982322	0.03283008535974141	1.6885931611803977
A9UF02_HUMAN	29221	Fibrocystic breast disease	602	4	0.3362504539484894	0.291108033216784	1.5479198482696563
A9UF02_HUMAN	29221	Fistula	4271	31	0.0065825822484651565	0.010008208113506004	1.6919421077371986
A9UF02_HUMAN	29221	Fistula discharge	508	4	0.17750357247109638	0.1760857530796839	1.8366191850501081
A9UF02_HUMAN	29221	Flank pain	4032	24	0.11593862813009338	0.12421082490670146	1.3857126785408
A9UF02_HUMAN	29221	Fluid intake reduced	1902	10	0.4805331866839177	0.3818530477322363	1.2231184847585288
A9UF02_HUMAN	29221	Food poisoning	1520	9	0.32139313604258757	0.2807551797271032	1.3783760131348926
A9UF02_HUMAN	29221	Fracture	5789	27	0.615773124277919	0.45771807296202943	1.084376686487412
A9UF02_HUMAN	29221	Fractured sacrum	525	3	0.4971335088364227	0.3920120406075095	1.329965616760423
A9UF02_HUMAN	29221	Fungal infection	12022	59	0.29546265302636077	0.2629229442677843	1.141304607678885
A9UF02_HUMAN	29221	Furuncle	3104	19	0.12887110957344633	0.135914064456313	1.42524030113775
A9UF02_HUMAN	29221	Gallbladder pain	605	4	0.33810458994339837	0.2924138279721527	1.540193126897262
A9UF02_HUMAN	29221	Gamma-glutamyltransferase increased	12536	101	1.0050209298895174e-08	3.070094436170122e-08	1.879599175629085
A9UF02_HUMAN	29221	Gastric haemorrhage	5437	38	0.004808172493280121	0.007524402834439972	1.6287706349360838
A9UF02_HUMAN	29221	Gastric polyps	978	5	0.6203529163422922	0.46029464960878225	1.1891778896007894
A9UF02_HUMAN	29221	Gastric ulcer haemorrhage	2788	15	0.3818523596267693	0.32119401015860816	1.2517887701928252
A9UF02_HUMAN	29221	Gastritis	12548	84	0.00012475467164944996	0.0002543362861922212	1.5595938265861955
A9UF02_HUMAN	29221	Gastritis erosive	2351	13	0.3415405100877396	0.29443891747667306	1.2867332015021715
A9UF02_HUMAN	29221	Gastritis haemorrhagic	674	5	0.22250066352351935	0.2105657052387875	1.7295516989261106
A9UF02_HUMAN	29221	Gastroenteritis	6181	30	0.4950254303012859	0.39073334837544327	1.1286653421377677
A9UF02_HUMAN	29221	Gastrointestinal disorder	23106	150	2.0232120786051194e-06	5.066716522030224e-06	1.5121145930234814
A9UF02_HUMAN	29221	Gastrointestinal haemorrhage	40935	294	3.5277536662293895e-16	1.6530360185150067e-15	1.6740661177381513
A9UF02_HUMAN	29221	Gastrointestinal hypomotility	788	6	0.16125090881935567	0.16274228747806338	1.7755551200740176
A9UF02_HUMAN	29221	Gastrointestinal infection	2931	18	0.15448984422317225	0.1570400551846128	1.4299527331595074
A9UF02_HUMAN	29221	Gastrointestinal obstruction	614	5	0.19894350490280865	0.19277802437400154	1.8999508810863188
A9UF02_HUMAN	29221	Gastrointestinal pain	3399	15	0.8952018071026262	0.6085556335410326	1.025771353352454
A9UF02_HUMAN	29221	Gastrointestinal stoma complication	564	4	0.3144685306623375	0.2758178024771804	1.6529572665450971
A9UF02_HUMAN	29221	Gastrointestinal ulcer	1053	9	0.051994369463444975	0.06291642828046158	1.9949484251406346
A9UF02_HUMAN	29221	Generalised erythema	4312	20	0.7258651732600043	0.5200521280919469	1.0783505000760187
A9UF02_HUMAN	29221	Gingival bleeding	5125	24	0.6682449527677796	0.4882162262956744	1.088793651360817
A9UF02_HUMAN	29221	Gingival swelling	2096	11	0.500404225382125	0.39406895430699707	1.2208892999901437
A9UF02_HUMAN	29221	Glaucoma	7228	35	0.4710017660369321	0.37589068893638555	1.126023996395242
A9UF02_HUMAN	29221	Glioblastoma	605	5	0.19620062865815896	0.1909233892075277	1.9284501443026134
A9UF02_HUMAN	29221	Goitre	2062	13	0.17364501599419482	0.17296296380185153	1.4682197291908623
A9UF02_HUMAN	29221	Gout	6700	38	0.09195098515707552	0.10264001819472927	1.3199838874241843
A9UF02_HUMAN	29221	Haemangioma	1093	6	0.48334698624815786	0.38362712175403435	1.2773542814147947
A9UF02_HUMAN	29221	Haematemesis	11535	91	1.0652908451552516e-07	2.9985166207005356e-07	1.8401499105019696
A9UF02_HUMAN	29221	Haematocrit increased	709	4	0.5551906332537218	0.4236837979399089	1.3129873322911412
A9UF02_HUMAN	29221	Haematoma	11522	55	0.4326539675907143	0.3529377154344665	1.109947758995138
A9UF02_HUMAN	29221	Haematuria	14435	93	0.00021231628970306367	0.0004186866670410054	1.500592916637649
A9UF02_HUMAN	29221	Haemodynamic instability	2660	19	0.03584507174430272	0.04551302166402297	1.6648490454411051
A9UF02_HUMAN	29221	Haemoglobin abnormal	1867	9	0.7208661609852076	0.5171931565330345	1.1209505682706258
A9UF02_HUMAN	29221	Haemoglobin increased	1267	6	0.6695417593324762	0.48894026142681896	1.1010976240268688
A9UF02_HUMAN	29221	Haemolytic uraemic syndrome	1299	8	0.2837992571928273	0.25460420621651964	1.4340140499849023
A9UF02_HUMAN	29221	Haemoptysis	11149	58	0.14708146612045442	0.15093109420946274	1.2101715809526812
A9UF02_HUMAN	29221	Haemorrhage	41371	230	0.00016196308685269688	0.0003248572337878836	1.2937270358705943
A9UF02_HUMAN	29221	Haemorrhagic stroke	3394	17	0.5098521355812726	0.3992796229965407	1.164950634994768
A9UF02_HUMAN	29221	Haemorrhoidal haemorrhage	1941	11	0.3805581561746428	0.32039676256603977	1.3189399950670724
A9UF02_HUMAN	29221	Haemorrhoids	8616	45	0.1871651945001711	0.18398505248104588	1.2149843401276528
A9UF02_HUMAN	29221	Hand fracture	2665	13	0.6546469216372857	0.48063076025288076	1.1343824378250666
A9UF02_HUMAN	29221	Heart valve incompetence	1310	11	0.032574792836974786	0.04180233423241042	1.9596260126862586
A9UF02_HUMAN	29221	Heat rash	674	4	0.5442489067596099	0.4173328265669273	1.381576222783962
A9UF02_HUMAN	29221	Helicobacter infection	1587	8	0.5642727953726557	0.42907204477176486	1.1724586057824629
A9UF02_HUMAN	29221	Hemiplegia	4142	30	0.008289556009554336	0.01233112256710057	1.6883318383972294
A9UF02_HUMAN	29221	Hepatic cirrhosis	6661	54	2.0027026985632008e-05	4.508127602091623e-05	1.8913814038263868
A9UF02_HUMAN	29221	Hepatic encephalopathy	4116	25	0.09340741888530962	0.10405562409498596	1.4141653465919923
A9UF02_HUMAN	29221	Hepatic enzyme increased	22749	99	0.8790271277629569	0.5992817273811414	1.0114784862832251
A9UF02_HUMAN	29221	Hepatic failure	14690	123	2.0282729194458722e-11	7.41714927228548e-11	1.9540004208077557
A9UF02_HUMAN	29221	Hepatic function abnormal	14160	110	1.1809358799582517e-08	3.587333072888174e-08	1.811782341978256
A9UF02_HUMAN	29221	Hepatic steatosis	8330	48	0.05317044747549748	0.06413446667876357	1.341206572226884
A9UF02_HUMAN	29221	Hepatitis	10691	69	0.0014028017011273844	0.002430056848608041	1.5032543019041273
A9UF02_HUMAN	29221	Hepatitis acute	2882	21	0.021454627498524715	0.02893040472260178	1.6985999173864335
A9UF02_HUMAN	29221	Hepatitis fulminant	1553	9	0.3295251131780116	0.28639354471791906	1.3489159040458696
A9UF02_HUMAN	29221	Hepatocellular injury	6243	32	0.3317019909061666	0.2878881204430066	1.1922795933218542
A9UF02_HUMAN	29221	Hernia	6332	31	0.4417746541667471	0.35873337295294344	1.138523176766501
A9UF02_HUMAN	29221	Hiccups	3250	14	0.8936691996970477	0.6076865523674885	1.0011731280681058
A9UF02_HUMAN	29221	Hip surgery	1389	6	0.8385036712811588	0.5768088001575318	1.0039653679666534
A9UF02_HUMAN	29221	Hirsutism	624	5	0.20224748921515145	0.19514419974481473	1.869257005786055
A9UF02_HUMAN	29221	Histiocytosis haematophagic	2196	17	0.020983349818246805	0.028364674326025036	1.8054329024219051
A9UF02_HUMAN	29221	Hyperaemia	755	6	0.1491125147975802	0.15255542276802916	1.85378385033095
A9UF02_HUMAN	29221	Hypercapnia	1170	9	0.10889891545421859	0.11779809504092024	1.7939071109791753
A9UF02_HUMAN	29221	Hypernatraemia	1989	14	0.08198953433951695	0.09288982813430671	1.6404031607232354
A9UF02_HUMAN	29221	Hyperpyrexia	1139	5	0.8208967278869752	0.5673023301711205	1.0203439916945045
A9UF02_HUMAN	29221	Hyperreflexia	1723	8	0.7132086964129076	0.5130630731545288	1.0794822965192474
A9UF02_HUMAN	29221	Hyperthermia	3212	19	0.17440451878913957	0.17361399560593307	1.377032987475715
A9UF02_HUMAN	29221	Hyperthyroidism	4583	22	0.5715392277473699	0.4332850964735037	1.116226349695001
A9UF02_HUMAN	29221	Hypertransaminasaemia	545	3	0.5114041235835106	0.40022542541929523	1.2808893947397433
A9UF02_HUMAN	29221	Hypertrophic cardiomyopathy	619	5	0.20056230482815657	0.1939113231202038	1.8844789683738894
A9UF02_HUMAN	29221	Hypokalaemia	17632	114	4.00950590982938e-05	8.705114956990063e-05	1.5059480519499802
A9UF02_HUMAN	29221	Hypokinesia	5261	27	0.3418800689290509	0.29462691761305004	1.1937673801185456
A9UF02_HUMAN	29221	Hypophagia	12533	82	0.00035800746174038803	0.0006830539794943164	1.5240502304985717
A9UF02_HUMAN	29221	Hypophosphataemia	2474	18	0.030592863506142327	0.03959181380070839	1.6960310715365006
A9UF02_HUMAN	29221	Hyporeflexia	1191	7	0.3699454720509743	0.3133576763632645	1.3681571969714488
A9UF02_HUMAN	29221	Hypothyroidism	11479	65	0.031817496961159854	0.0409562423425099	1.3178474790222872
A9UF02_HUMAN	29221	Hypovolaemia	3116	19	0.13001410245060868	0.13694542326566297	1.4197178976460956
A9UF02_HUMAN	29221	Hypoxia	13091	106	2.790297118334709e-09	8.887331619563627e-09	1.8890940189086824
A9UF02_HUMAN	29221	Immunodeficiency	2426	15	0.15961663519331157	0.16138490501762315	1.4397388053690185
A9UF02_HUMAN	29221	Immunosuppression	2311	19	0.009525430920155105	0.013971907186224765	1.9183535466884636
A9UF02_HUMAN	29221	Impaired healing	13368	61	0.6429259662068798	0.4734181407168853	1.0608142373408829
A9UF02_HUMAN	29221	Inappropriate antidiuretic hormone secretion	3748	18	0.6160454011941421	0.45786434104429896	1.1167432471028538
A9UF02_HUMAN	29221	Incisional hernia	664	3	0.7653404847936122	0.5388009505985787	1.0502905475778228
A9UF02_HUMAN	29221	Increased bronchial secretion	784	5	0.39990475061448905	0.3313872704854566	1.485327453891615
A9UF02_HUMAN	29221	Induration	908	4	0.7999466967067357	0.5564491815739125	1.0239558288332462
A9UF02_HUMAN	29221	Infection	45111	291	7.071856467780504e-11	2.50053622045628e-10	1.5024872610229196
A9UF02_HUMAN	29221	Inflammation	14946	81	0.04485050896714159	0.055275397845600344	1.2609845544985807
A9UF02_HUMAN	29221	Ingrowing nail	909	5	0.6045335352140084	0.4511384969220918	1.2799447860415578
A9UF02_HUMAN	29221	Intervertebral disc protrusion	10144	72	7.121307170621629e-05	0.000149870307717723	1.6542701793858798
A9UF02_HUMAN	29221	Intestinal dilatation	673	3	0.7681076179325282	0.5403872515724716	1.0361821670879714
A9UF02_HUMAN	29221	Intestinal infarction	620	4	0.34763654691867085	0.2981892535200577	1.5026884241319067
A9UF02_HUMAN	29221	Intestinal obstruction	12112	81	0.00016706620359011997	0.0003344938616454839	1.5580197325759624
A9UF02_HUMAN	29221	Intestinal perforation	4565	26	0.1723459860464478	0.1718564712769906	1.3255704891438982
A9UF02_HUMAN	29221	Intestinal ulcer	689	3	0.7731460452403975	0.5432175467480671	1.0120146529867942
A9UF02_HUMAN	29221	Intra-uterine death	3237	20	0.10570892923831697	0.1149329050278596	1.4386945434648033
A9UF02_HUMAN	29221	Intracranial hypotension	1028	6	0.4655558938694928	0.3726422777925515	1.35859501359871
A9UF02_HUMAN	29221	Iridocyclitis	781	4	0.5839293934107171	0.4404200137831997	1.191320552464935
A9UF02_HUMAN	29221	Ischaemia	2807	15	0.38401910799527694	0.32207888881732405	1.2432701503383612
A9UF02_HUMAN	29221	Ischaemic cardiomyopathy	2270	10	0.8720028689328478	0.5952187179640831	1.0239558288332462
A9UF02_HUMAN	29221	Jaundice	14931	125	1.296121086560216e-11	4.79311589406827e-11	1.953718233455302
A9UF02_HUMAN	29221	Jaundice cholestatic	1756	11	0.1987119848163722	0.19261634225479232	1.4587703097303437
A9UF02_HUMAN	29221	Jaw fracture	1080	5	0.8133328075264334	0.5629950452148295	1.0763442665875051
A9UF02_HUMAN	29221	Jaw operation	615	3	0.7513648339196675	0.530851046025209	1.1343824378250666
A9UF02_HUMAN	29221	Joint contracture	677	3	0.769353597278604	0.5410419284631264	1.0300327180251347
A9UF02_HUMAN	29221	Joint effusion	2854	16	0.2535290777797731	0.2337893192227573	1.304659717075764
A9UF02_HUMAN	29221	Kidney fibrosis	770	6	0.15438487838537615	0.1569539736306279	1.8173875705469655
A9UF02_HUMAN	29221	Klebsiella infection	1559	11	0.11521759001019749	0.12355651341442643	1.6444148517309107
A9UF02_HUMAN	29221	Laboratory test abnormal	7441	33	0.8589869414170954	0.5879870405479385	1.0308669777859543
A9UF02_HUMAN	29221	Lactose intolerance	962	5	0.6161529641995998	0.4579251486679167	1.2090596516003846
A9UF02_HUMAN	29221	Large intestinal obstruction	544	3	0.5106795928969492	0.39977228773183127	1.2832570276320534
A9UF02_HUMAN	29221	Large intestinal ulcer	1112	5	0.8172172214477132	0.5651767732293319	1.0452304305163216
A9UF02_HUMAN	29221	Large intestine perforation	2853	16	0.2533628536376611	0.2336692862756575	1.3051195900814303
A9UF02_HUMAN	29221	Laryngeal oedema	2829	15	0.38683073350317476	0.3236772188845003	1.2335501989142517
A9UF02_HUMAN	29221	Left ventricular failure	1499	11	0.07528714035721408	0.08645710315432328	1.7107219022039313
A9UF02_HUMAN	29221	Leukoencephalopathy	1792	9	0.5856026710942123	0.4414104608612955	1.1681021625613137
A9UF02_HUMAN	29221	Ligament injury	570	3	0.7407150563642682	0.5251211906876797	1.2244127900334054
A9UF02_HUMAN	29221	Lip blister	1077	5	0.8129976157353171	0.5628082479277493	1.0793564240499702
A9UF02_HUMAN	29221	Lip dry	2675	12	0.8817220446825991	0.6007796159636115	1.0427969236934898
A9UF02_HUMAN	29221	Lip haemorrhage	523	4	0.29514460196575687	0.2627079414546096	1.7835377057133999
A9UF02_HUMAN	29221	Lip pain	1155	6	0.6473845255663349	0.4761350451341908	1.2084282888580344
A9UF02_HUMAN	29221	Liver function test abnormal	19990	114	0.0034368697679842608	0.005539127353193538	1.3272890910676067
A9UF02_HUMAN	29221	Liver injury	5356	26	0.5295200408055514	0.41077878600404355	1.1288488649576274
A9UF02_HUMAN	29221	Liver transplant	1763	8	0.8541233885758273	0.5850968080781112	1.0548787114133955
A9UF02_HUMAN	29221	Lower limb fracture	6528	46	0.0016661302277646414	0.0028460610772317535	1.642246960282386
A9UF02_HUMAN	29221	Lumbar vertebral fracture	1619	7	0.8500349312458728	0.583065589034361	1.0048995789169946
A9UF02_HUMAN	29221	Lymphadenopathy	14517	107	2.3015676086919095e-07	6.291773951796422e-07	1.7183414193508368
A9UF02_HUMAN	29221	Lymphocyte percentage decreased	790	4	0.5879820079536964	0.44278087594150944	1.1776794774367105
A9UF02_HUMAN	29221	Lymphocytosis	879	5	0.43695859096848894	0.3556830182134558	1.3238788175990481
A9UF02_HUMAN	29221	Lymphoma	6292	35	0.12311966443443591	0.1307222128740318	1.2944686920362756
A9UF02_HUMAN	29221	Lymphopenia	4107	27	0.03138205704065944	0.04047719751189908	1.53141629106384
A9UF02_HUMAN	29221	Macular degeneration	4743	33	0.010022420069798229	0.014630904333899875	1.6213720958467832
A9UF02_HUMAN	29221	Macular oedema	2794	13	0.7709812764450794	0.541962131333593	1.0817627562431058
A9UF02_HUMAN	29221	Maculopathy	1021	5	0.6329825945709652	0.4677465341260552	1.1388485104149293
A9UF02_HUMAN	29221	Malignant melanoma	4401	35	0.0007382077647183034	0.0013394236872413085	1.855128402673151
A9UF02_HUMAN	29221	Mallory-Weiss syndrome	711	5	0.24103244558971026	0.22435670944339367	1.6389094710787082
A9UF02_HUMAN	29221	Melanocytic naevus	1595	8	0.5660538800658443	0.4301756641867468	1.1665482914495962
A9UF02_HUMAN	29221	Meningioma	1147	6	0.6462594359781177	0.4754124235459545	1.216901055125225
A9UF02_HUMAN	29221	Meningitis	2871	15	0.39306917213410186	0.32719226915965277	1.2154097548125715
A9UF02_HUMAN	29221	Meningitis bacterial	566	4	0.3155296697960637	0.27658842456193306	1.6470748563438693
A9UF02_HUMAN	29221	Meningitis cryptococcal	526	3	0.4978351459842678	0.39245750735117607	1.3274226614702502
A9UF02_HUMAN	29221	Micturition disorder	1435	9	0.22507848457860768	0.21256373555568853	1.4605372761899176
A9UF02_HUMAN	29221	Middle ear effusion	816	4	0.7841832779603413	0.5476345771287642	1.1399705286517912
A9UF02_HUMAN	29221	Mitral valve incompetence	6732	44	0.00868313595678287	0.012865168211836451	1.5224606402389054
A9UF02_HUMAN	29221	Monoplegia	2023	12	0.2341696824415369	0.2193560663750345	1.3808892132251434
A9UF02_HUMAN	29221	Mouth ulceration	7498	40	0.1840547724676332	0.1814284912549941	1.2411585804039347
A9UF02_HUMAN	29221	Mucous membrane disorder	1248	8	0.2705519402301649	0.24580145775724133	1.4929936601052491
A9UF02_HUMAN	29221	Muscle atrophy	4982	23	0.6653605195436336	0.48664920670671435	1.07330558545578
A9UF02_HUMAN	29221	Muscle injury	1534	10	0.17055221103287405	0.17035886296046376	1.518464680553239
A9UF02_HUMAN	29221	Muscle rupture	1385	8	0.40437412536043216	0.33422564399585486	1.3444532596445236
A9UF02_HUMAN	29221	Musculoskeletal chest pain	6502	30	0.7037512644398662	0.5075526586947444	1.0726854943586848
A9UF02_HUMAN	29221	Myalgia	68349	419	4.577606425905169e-12	1.737856128975991e-11	1.4273880944433297
A9UF02_HUMAN	29221	Myasthenia gravis	1417	12	0.0243134961866038	0.03229977020238431	1.976489827612643
A9UF02_HUMAN	29221	Mycobacterium avium complex infection	770	4	0.5790957146433369	0.43759987677734197	1.2084282888580347
A9UF02_HUMAN	29221	Mycosis fungoides	601	4	0.3356364480854092	0.2906757659213082	1.5505126788362722
A9UF02_HUMAN	29221	Myelitis transverse	539	3	0.5070732231085016	0.39765723283134696	1.2952277088599642
A9UF02_HUMAN	29221	Myocardial ischaemia	8172	41	0.3097276734836819	0.27248997522394386	1.1668890308656819
A9UF02_HUMAN	29221	Myocarditis	2395	15	0.15579894987038223	0.15813989165743514	1.4584917057750857
A9UF02_HUMAN	29221	Myopathy	3739	28	0.00558970817525541	0.008635479584361215	1.7460502519150582
A9UF02_HUMAN	29221	Nasal septum deviation	783	5	0.39960536899995525	0.3311995565745286	1.4872366151434036
A9UF02_HUMAN	29221	Nausea	295487	1739	2.8196026366840872e-37	2.4792562789488095e-36	1.3699803100380918
A9UF02_HUMAN	29221	Neck mass	970	7	0.20827731024922128	0.19969259864043964	1.6821371975225288
A9UF02_HUMAN	29221	Nephritis	994	8	0.08266674868945618	0.09356641548232142	1.8775985177794208
A9UF02_HUMAN	29221	Nephrolithiasis	15088	104	6.6035509907935785e-06	1.5675177785058768e-05	1.6061837827613863
A9UF02_HUMAN	29221	Nephropathy	2391	20	0.006731272431847355	0.010211962645450549	1.9520372612088874
A9UF02_HUMAN	29221	Nephrosclerosis	584	3	0.743755858027296	0.5268053682301894	1.1949088673819979
A9UF02_HUMAN	29221	Neuritis	677	3	0.769353597278604	0.5410419284631264	1.0300327180251347
A9UF02_HUMAN	29221	Neurological symptom	2400	15	0.15636974773483991	0.15862079692544256	1.4554340711717837
A9UF02_HUMAN	29221	Neutrophil count abnormal	814	4	0.7839126809857724	0.5474927503540243	1.1427852706978452
A9UF02_HUMAN	29221	Neutrophil count increased	4637	33	0.006580734480184756	0.010005773917121132	1.6587016879753145
A9UF02_HUMAN	29221	Neutrophilia	890	7	0.11474371509570375	0.123139654864389	1.8345392086230976
A9UF02_HUMAN	29221	Night sweats	11368	57	0.25037083290527906	0.23141565527528848	1.1661744308221975
A9UF02_HUMAN	29221	Nipple pain	924	5	0.6074372172659119	0.4528316323653337	1.259053413037615
A9UF02_HUMAN	29221	Nocturia	4170	18	0.9059016484724984	0.614941116554917	1.0032399594637875
A9UF02_HUMAN	29221	Nodule	4495	37	0.00033549581120030343	0.0006428156903803655	1.9206636699649178
A9UF02_HUMAN	29221	Non-small cell lung cancer	1487	7	0.6921706810668182	0.5011913151402884	1.094525757577159
A9UF02_HUMAN	29221	Nosocomial infection	1079	8	0.15231515690430597	0.15520921187576117	1.7285827624001016
A9UF02_HUMAN	29221	Nuclear magnetic resonance imaging brain abnormal	1464	9	0.310567447760715	0.27307741942225994	1.4314269112349296
A9UF02_HUMAN	29221	Obstructive airways disorder	2705	13	0.6574805543937143	0.48230179012632385	1.1175268295364327
A9UF02_HUMAN	29221	Ocular hyperaemia	13811	80	0.01092305556213162	0.01581363568002327	1.3482718946402368
A9UF02_HUMAN	29221	Odynophagia	2322	12	0.5223323583654046	0.40686815778205915	1.2021507393055253
A9UF02_HUMAN	29221	Oedema mouth	2975	13	0.8882836767443321	0.6045974846727836	1.0156590901796343
A9UF02_HUMAN	29221	Oesophageal carcinoma	1531	11	0.11140851816826242	0.12006986777918424	1.6747067042627959
A9UF02_HUMAN	29221	Oesophageal disorder	2013	13	0.1675783838562347	0.16793711314412238	1.5041911125560385
A9UF02_HUMAN	29221	Oesophageal ulcer	2038	11	0.39653455657900316	0.32920716119696597	1.2558234782829056
A9UF02_HUMAN	29221	Oesophagitis	5289	32	0.057792939356297736	0.06883985582482688	1.4086453403313746
A9UF02_HUMAN	29221	Oliguria	2981	16	0.32819957550476114	0.28550047011369817	1.2487771592111359
A9UF02_HUMAN	29221	Operative haemorrhage	539	3	0.5070732231085016	0.39765723283134696	1.2952277088599642
A9UF02_HUMAN	29221	Opportunistic infection	851	4	0.7894647532082575	0.5505239601359392	1.0928643084595684
A9UF02_HUMAN	29221	Optic atrophy	816	5	0.4105734033086552	0.33821732709240926	1.4267202054026733
A9UF02_HUMAN	29221	Optic ischaemic neuropathy	1459	7	0.687281127779299	0.4984123408990933	1.1156323148858094
A9UF02_HUMAN	29221	Optic nerve disorder	901	7	0.1183067211262061	0.1263863122749388	1.8119665785393682
A9UF02_HUMAN	29221	Oral candidiasis	4792	28	0.12011023784974761	0.12802691423091989	1.3601159707927752
A9UF02_HUMAN	29221	Oral pain	8705	51	0.03257768181598493	0.04180535361638978	1.3637756971495254
A9UF02_HUMAN	29221	Oropharyngeal blistering	3232	14	0.8931059194497661	0.60741679470921	1.0067732263605937
A9UF02_HUMAN	29221	Oropharyngeal discomfort	1704	9	0.4590862083643569	0.3688073795097807	1.2287469945998952
A9UF02_HUMAN	29221	Osteomyelitis	7645	38	0.38068963280016677	0.32047684657427483	1.1560053448166052
A9UF02_HUMAN	29221	Osteopenia	5093	22	0.9147484232245101	0.6202520252164736	1.0039653679666534
A9UF02_HUMAN	29221	Osteosclerosis	810	6	0.17040290637828368	0.17023908225248097	1.7269702784799523
A9UF02_HUMAN	29221	Oxygen saturation abnormal	523	3	0.49573434227446705	0.39116437917324115	1.3350808691325786
A9UF02_HUMAN	29221	PO2 decreased	1049	8	0.09809147482837499	0.10840735015248075	1.778397827598952
A9UF02_HUMAN	29221	Packed red blood cell transfusion	525	4	0.2959715459117896	0.2632935134339695	1.776691111833502
A9UF02_HUMAN	29221	Painful defaecation	736	4	0.5651037793291142	0.42957374740742943	1.2645574716738448
A9UF02_HUMAN	29221	Palatal oedema	514	3	0.4895091677006906	0.38746956284924167	1.35859501359871
A9UF02_HUMAN	29221	Pallor	10990	84	1.2008415546651281e-06	3.077094120740998e-06	1.782392944669938
A9UF02_HUMAN	29221	Palmar-plantar erythrodysaesthesia syndrome	7595	34	0.7920694244898041	0.5519950082397926	1.040613224276506
A9UF02_HUMAN	29221	Pancreatic carcinoma	6253	47	0.0004405058651905944	0.0008283266158749534	1.7525715136749498
A9UF02_HUMAN	29221	Pancreatic carcinoma metastatic	1519	7	0.8426522541965988	0.5787172584974861	1.0713611912792296
A9UF02_HUMAN	29221	Panniculitis	606	5	0.19649437758543725	0.19115932635947563	1.9252414086215774
A9UF02_HUMAN	29221	Paralysis	6374	33	0.29072828629350717	0.2595397174077354	1.2043309527579797
A9UF02_HUMAN	29221	Paraparesis	776	4	0.5817153889292264	0.4391214765777564	1.199036359151884
A9UF02_HUMAN	29221	Paraplegia	1214	10	0.04563528893592765	0.05613782822688463	1.9220433331919735
A9UF02_HUMAN	29221	Paresis	1104	6	0.48692848738217365	0.38587214616565846	1.2645574716738448
A9UF02_HUMAN	29221	Parkinson's disease	5312	25	0.6000421187943998	0.44874907558596683	1.094259586326431
A9UF02_HUMAN	29221	Paronychia	1233	9	0.12043462627682455	0.12832403665890085	1.7015736567376
A9UF02_HUMAN	29221	Parosmia	3042	15	0.5772554494860916	0.4365158463665846	1.1467493424990762
A9UF02_HUMAN	29221	Parotitis	557	4	0.31083596196429203	0.27327058465070264	1.6738807762481998
A9UF02_HUMAN	29221	Pathological fracture	2308	10	0.8738054941652054	0.5963041322930774	1.0070235740483622
A9UF02_HUMAN	29221	Pericardial haemorrhage	923	6	0.3032593487629022	0.2681476426307554	1.5141593281329135
A9UF02_HUMAN	29221	Pericarditis	3392	28	0.0014183584739916812	0.002454908189305034	1.9261571001357851
A9UF02_HUMAN	29221	Periodontitis	1111	5	0.8170876829618998	0.5651082769028168	1.0461754851551248
A9UF02_HUMAN	29221	Peripheral vascular disorder	3205	15	0.6848286897940508	0.4970327830084331	1.088153686440346
A9UF02_HUMAN	29221	Perirectal abscess	668	5	0.21976306547674898	0.2083963341880225	1.7452037505001026
A9UF02_HUMAN	29221	Peritonitis	11195	51	0.6642050029988025	0.4860472051935614	1.0590555350979893
A9UF02_HUMAN	29221	Petechiae	4354	32	0.004959618667082092	0.007742495688219548	1.713384672402137
A9UF02_HUMAN	29221	Photophobia	6503	29	0.7764896727691216	0.5444324914466816	1.0366089746946392
A9UF02_HUMAN	29221	Photosensitivity reaction	6123	31	0.37771683621553764	0.31847991960315364	1.1775828195675841
A9UF02_HUMAN	29221	Pituitary tumour benign	810	4	0.7833823020885491	0.5472162010905187	1.1484566616194225
A9UF02_HUMAN	29221	Platelet count abnormal	1515	10	0.16585643867674807	0.16652421937543466	1.5376346665535787
A9UF02_HUMAN	29221	Platelet disorder	807	4	0.7829941007958996	0.5470362502732564	1.1527472842655724
A9UF02_HUMAN	29221	Pneumonia	109688	662	7.155894767768171e-17	3.4547859022800526e-16	1.4051334494836059
A9UF02_HUMAN	29221	Pneumonia aspiration	9035	47	0.19711116619341185	0.19156938870358334	1.2101089022993703
A9UF02_HUMAN	29221	Pneumonia bacterial	2336	16	0.07816945763568312	0.08914366697868728	1.5959587401125077
A9UF02_HUMAN	29221	Pneumonia pneumococcal	607	4	0.3393506406431579	0.2932938057755359	1.53508469198218
A9UF02_HUMAN	29221	Pneumonitis	7289	61	2.3684831563713373e-06	5.891773328537496e-06	1.9529959956136043
A9UF02_HUMAN	29221	Pneumothorax	5707	34	0.06721883664625258	0.07855438880175684	1.3869340011906686
A9UF02_HUMAN	29221	Polyuria	3109	19	0.1293386008163202	0.13633944653200836	1.422934087058239
A9UF02_HUMAN	29221	Poor peripheral circulation	1987	11	0.387058797247657	0.3238137683965481	1.2882359263559968
A9UF02_HUMAN	29221	Portal hypertension	1333	8	0.2945193762973218	0.26225943392645773	1.3972167083249125
A9UF02_HUMAN	29221	Post herpetic neuralgia	556	3	0.5194401262181606	0.4050703144853717	1.2554105821861496
A9UF02_HUMAN	29221	Post procedural complication	11382	51	0.7740098276919944	0.5437211912587822	1.0415775203540723
A9UF02_HUMAN	29221	Potentiating drug interaction	1312	6	0.8308253869790746	0.5723350919043658	1.0631578130917931
A9UF02_HUMAN	29221	Premature baby	10919	82	3.331268442826893e-06	8.159806317969573e-06	1.7510334428289855
A9UF02_HUMAN	29221	Premature labour	6010	43	0.0020516344622076394	0.003452134535122947	1.6676391393667647
A9UF02_HUMAN	29221	Priapism	1696	11	0.1875624665756754	0.1842956610444015	1.510714653103531
A9UF02_HUMAN	29221	Proctalgia	2737	17	0.14056456155292119	0.14598439861168025	1.4463376082269601
A9UF02_HUMAN	29221	Proctitis	907	7	0.12032064636415782	0.1282222664969673	1.7998868013491056
A9UF02_HUMAN	29221	Product packaging issue	2085	10	0.7355302183746272	0.5228817917534903	1.1152482762231983
A9UF02_HUMAN	29221	Productive cough	12507	64	0.17070718336496005	0.1704916531230063	1.1902673879485712
A9UF02_HUMAN	29221	Prostate cancer metastatic	1124	6	0.4938136055476449	0.39000092146783083	1.241935692216352
A9UF02_HUMAN	29221	Protein total increased	989	5	0.6234056764906942	0.4620407159580604	1.1758842343308618
A9UF02_HUMAN	29221	Protein urine present	1944	10	0.4887758864867895	0.3870006390601033	1.1965564494121697
A9UF02_HUMAN	29221	Proteinuria	6021	37	0.03758481411795914	0.047395320481414385	1.4308687568020728
A9UF02_HUMAN	29221	Prothrombin time prolonged	4742	36	0.0016718897611623829	0.0028552306863512105	1.770272975645408
A9UF02_HUMAN	29221	Prothrombin time shortened	872	6	0.28799578661693814	0.25755760188007915	1.6033303740160296
A9UF02_HUMAN	29221	Prurigo	651	5	0.2124459130885977	0.2027654242083226	1.7911301649869473
A9UF02_HUMAN	29221	Pseudomembranous colitis	1225	9	0.1187147872464006	0.12675026227177663	1.7127682202687686
A9UF02_HUMAN	29221	Pseudomonal sepsis	686	5	0.22820759063543475	0.21498171909563488	1.699075017006708
A9UF02_HUMAN	29221	Pseudomonas infection	3050	18	0.16617892140029694	0.16678064308339213	1.3738299181047644
A9UF02_HUMAN	29221	Psychomotor retardation	1086	5	0.8140186220263919	0.5633786002743197	1.070370107846039
A9UF02_HUMAN	29221	Pulmonary arterial pressure increased	608	3	0.7495504661960155	0.529845009994831	1.147507523882547
A9UF02_HUMAN	29221	Pulmonary congestion	5773	44	0.00039357075668859935	0.000745805463590364	1.7773113565923895
A9UF02_HUMAN	29221	Pulmonary fibrosis	6826	50	0.00040875560452236317	0.0007723980598880091	1.7076004819680757
A9UF02_HUMAN	29221	Pulmonary function test decreased	1309	7	0.5212472927249179	0.4061967993084738	1.244161383421041
A9UF02_HUMAN	29221	Pulmonary granuloma	630	5	0.20435571960661203	0.19670004288029388	1.851312138530509
A9UF02_HUMAN	29221	Pulmonary hypertension	9438	56	0.02197457677956257	0.029548987814956133	1.3812817064286464
A9UF02_HUMAN	29221	Pulmonary oedema	19496	165	3.4370755672325176e-15	1.5386502864661562e-14	1.9752373316016631
A9UF02_HUMAN	29221	Pulmonary toxicity	1615	12	0.08120810983221512	0.09211837818305893	1.7323569605712807
A9UF02_HUMAN	29221	Pulmonary valve incompetence	736	4	0.5651037793291142	0.42957374740742943	1.2645574716738448
A9UF02_HUMAN	29221	Pulse abnormal	905	5	0.4495583594383247	0.3636888283546165	1.2856334295350755
A9UF02_HUMAN	29221	Pulse pressure decreased	508	3	0.4854280400013859	0.3849271322606442	1.374736736532556
A9UF02_HUMAN	29221	Pupillary reflex impaired	1097	6	0.48463186771547073	0.3844226915151471	1.2726710393197815
A9UF02_HUMAN	29221	Pupils unequal	706	4	0.5541636351000689	0.42308701833018847	1.3185983892667443
A9UF02_HUMAN	29221	Purpura	4366	28	0.04763541529722448	0.058312945273048346	1.4936819928208347
A9UF02_HUMAN	29221	Purulence	1316	8	0.288981095823404	0.25825764854655353	1.415376252699166
A9UF02_HUMAN	29221	Purulent discharge	2253	12	0.418707669897634	0.34375235131884063	1.239164751359109
A9UF02_HUMAN	29221	Pyelonephritis	3206	17	0.3450230042409813	0.2965710380271688	1.2336275617363848
A9UF02_HUMAN	29221	Pyoderma gangrenosum	790	5	0.4017458490523953	0.33257419269861094	1.4739746325879848
A9UF02_HUMAN	29221	Pyrexia	138114	1069	1.4183600265346211e-70	2.1288009561441488e-69	1.8051120764065764
A9UF02_HUMAN	29221	Pyuria	508	3	0.4854280400013859	0.3849271322606442	1.374736736532556
A9UF02_HUMAN	29221	QRS axis abnormal	503	3	0.48207244050485015	0.3828202379988844	1.3884841038978817
A9UF02_HUMAN	29221	Quadriparesis	578	3	0.7424198875035244	0.5260715480720635	1.2073774816503318
A9UF02_HUMAN	29221	Radiotherapy	661	5	0.21667012681792755	0.20600176900943146	1.7638263514962929
A9UF02_HUMAN	29221	Rash	134667	878	1.4145311072261822e-31	1.0910473786729851e-30	1.5186712450479736
A9UF02_HUMAN	29221	Rash erythematous	15632	91	0.005772115942916784	0.008890304687201816	1.3550399315220734
A9UF02_HUMAN	29221	Rash generalised	18360	135	9.273735844936895e-09	2.8410078720441533e-08	1.7141779060467675
A9UF02_HUMAN	29221	Rash maculo-papular	7867	53	0.0018535931961266646	0.0031434535804557707	1.5696113280988766
A9UF02_HUMAN	29221	Rash morbilliform	1027	5	0.634884249497976	0.4689517999914572	1.1321625113322584
A9UF02_HUMAN	29221	Rash papular	9768	48	0.35241875102001885	0.3013221487125051	1.142785270697845
A9UF02_HUMAN	29221	Raynaud's phenomenon	1929	10	0.4856678590292554	0.38506538255310413	1.2059094180110141
A9UF02_HUMAN	29221	Reading disorder	900	7	0.11797587761171267	0.12608190188903778	1.8139956564548658
A9UF02_HUMAN	29221	Rectal abscess	613	4	0.3431354489335694	0.2953931348345519	1.519960704869055
A9UF02_HUMAN	29221	Rectal haemorrhage	18439	87	0.3675513339573082	0.3117027074308021	1.0970477063273367
A9UF02_HUMAN	29221	Rectal polyp	559	4	0.31186074339325454	0.2739992087767811	1.6678487734509089
A9UF02_HUMAN	29221	Red blood cell sedimentation rate increased	4024	19	0.6294883776633277	0.46565697969614267	1.0978442769063566
A9UF02_HUMAN	29221	Reflux oesophagitis	904	6	0.2969866901984098	0.2640318407832646	1.546196106790514
A9UF02_HUMAN	29221	Regurgitation	1627	8	0.7014222155684482	0.5062222627818351	1.1434911294197092
A9UF02_HUMAN	29221	Renal cancer	2919	18	0.11957462181381567	0.12754148088191075	1.4358677392946035
A9UF02_HUMAN	29221	Renal disorder	17267	140	8.805454133239537e-12	3.2883742126827424e-11	1.8916308999990603
A9UF02_HUMAN	29221	Renal failure	53693	344	3.0670752994019383e-12	1.1769152841824306e-11	1.492182083203282
A9UF02_HUMAN	29221	Renal failure acute	58442	265	0.39135463599100007	0.3262507675332779	1.054105825134041
A9UF02_HUMAN	29221	Renal function test abnormal	1347	10	0.09060394465278587	0.10132024715882036	1.7308453052828243
A9UF02_HUMAN	29221	Renal haemorrhage	961	6	0.31769745009358774	0.27814881957453114	1.4539100564375724
A9UF02_HUMAN	29221	Renal impairment	25871	167	6.87166386514364e-07	1.8012965206692082e-06	1.503506881879255
A9UF02_HUMAN	29221	Renal infarct	599	3	0.7472971176278462	0.528617441592329	1.164835657632451
A9UF02_HUMAN	29221	Renal tubular acidosis	666	3	0.7659508765535559	0.5391651427602202	1.0471222503000615
A9UF02_HUMAN	29221	Renal tubular disorder	1630	9	0.44351237764594337	0.3598573539414044	1.2848403182275279
A9UF02_HUMAN	29221	Renal tubular necrosis	3867	27	0.018371380208818556	0.0251794820500836	1.6271298092553301
A9UF02_HUMAN	29221	Respiratory alkalosis	652	5	0.21285784001178	0.20307160689275094	1.7883618030627018
A9UF02_HUMAN	29221	Respiratory disorder	12363	56	0.6795751609685778	0.49402170406860313	1.0529930096460196
A9UF02_HUMAN	29221	Respiratory distress	12346	73	0.008738695804499381	0.012941396763146089	1.3764542706828724
A9UF02_HUMAN	29221	Respiratory failure	31725	219	6.790896078893211e-11	2.4037486669745886e-10	1.60857201143505
A9UF02_HUMAN	29221	Retinal artery occlusion	868	5	0.4319016678078357	0.3524752029499657	1.3407532868847836
A9UF02_HUMAN	29221	Retinal disorder	1307	8	0.2861923504900963	0.25627869795942015	1.4251825546809154
A9UF02_HUMAN	29221	Retinal exudates	594	5	0.1159594571934683	0.12422801992392951	1.964465342243749
A9UF02_HUMAN	29221	Retinal tear	980	6	0.3257803905484289	0.2838437005045996	1.4255483612914597
A9UF02_HUMAN	29221	Retinopathy	1622	8	0.7009679132508628	0.5059531015236021	1.1470335430796215
A9UF02_HUMAN	29221	Retroperitoneal haematoma	1012	6	0.4621623871027586	0.37065586052930977	1.3802028865784113
A9UF02_HUMAN	29221	Retroperitoneal haemorrhage	1387	9	0.21199968405541542	0.20244092575842199	1.5114123046783907
A9UF02_HUMAN	29221	Rhinitis allergic	1787	9	0.5848083569159069	0.44095105626947295	1.1713870392839272
A9UF02_HUMAN	29221	Road traffic accident	18176	83	0.5702107156249157	0.4326062873056945	1.0615908604020354
A9UF02_HUMAN	29221	Salmonellosis	521	3	0.4943407694910088	0.3903111503490528	1.340235621523052
A9UF02_HUMAN	29221	Sciatica	4713	27	0.14579656346845704	0.1499049694658579	1.3333714185959171
A9UF02_HUMAN	29221	Scotoma	841	4	0.787854971114303	0.5496092006172404	1.105921229707592
A9UF02_HUMAN	29221	Sequestrectomy	688	4	0.5483437392198558	0.41964850339464027	1.353298346879027
A9UF02_HUMAN	29221	Shock haemorrhagic	2538	17	0.06839467490500141	0.07976016178708768	1.5605070584598697
A9UF02_HUMAN	29221	Sinus tachycardia	6833	30	0.8533040746391618	0.5846260239927857	1.0204939761119223
A9UF02_HUMAN	29221	Skin cancer	4517	24	0.3038987386998968	0.26855254922463	1.2361309627401573
A9UF02_HUMAN	29221	Skin discolouration	16643	80	0.31314333101552344	0.27486192828158684	1.1177396235769541
A9UF02_HUMAN	29221	Skin disorder	10589	74	0.00010059608602862733	0.0002076801081720447	1.6285912773568434
A9UF02_HUMAN	29221	Skin exfoliation	16611	126	4.544472839762227e-09	1.424316873638265e-08	1.7687695591055819
A9UF02_HUMAN	29221	Skin fissures	2966	16	0.3258559838862489	0.2838937032650947	1.255126873580006
A9UF02_HUMAN	29221	Skin graft	671	4	0.5434236289794987	0.41690517532935867	1.387790208793485
A9UF02_HUMAN	29221	Skin haemorrhage	3112	20	0.07415509046839519	0.0853682211722097	1.4968565156294542
A9UF02_HUMAN	29221	Skin induration	986	6	0.3284432029232617	0.28566901268669026	1.4168205141815118
A9UF02_HUMAN	29221	Skin injury	1031	5	0.6361692182494947	0.4697442658929424	1.127748622399189
A9UF02_HUMAN	29221	Skin mass	1665	12	0.08662061203896551	0.0974877925224305	1.6799565685394817
A9UF02_HUMAN	29221	Skin plaque	2262	10	0.8716611477023096	0.595017023689164	1.0275933273370943
A9UF02_HUMAN	29221	Skin reaction	4749	23	0.5776709993864207	0.43675511175059917	1.1262214130925123
A9UF02_HUMAN	29221	Skin ulcer	9489	49	0.2081457456166977	0.19960215976074325	1.2011956407308653
A9UF02_HUMAN	29221	Small for dates baby	3930	20	0.46219557520567417	0.3706784360147892	1.1837034133826783
A9UF02_HUMAN	29221	Small intestinal obstruction	4702	29	0.05718672460788289	0.06822390079304445	1.436123796741514
A9UF02_HUMAN	29221	Soft tissue disorder	624	4	0.3502483429879518	0.29991465822614766	1.4929936601052491
A9UF02_HUMAN	29221	Spinal cord compression	1591	13	0.03112791913489467	0.04019942716124078	1.9064526141394658
A9UF02_HUMAN	29221	Spinal cord injury	533	4	0.29940445901850976	0.26570410418126494	1.7498224371743942
A9UF02_HUMAN	29221	Spinal fracture	6526	32	0.44793637440559825	0.3626796859546825	1.1403216128922138
A9UF02_HUMAN	29221	Spondylolisthesis	1052	5	0.8104136713002079	0.5613853229154614	1.1051290225229877
A9UF02_HUMAN	29221	Sputum discoloured	2447	12	0.6404663952040812	0.47204753845452596	1.1404386890331677
A9UF02_HUMAN	29221	Squamous cell carcinoma of skin	1820	12	0.14674682363223884	0.1506540193817735	1.5359337432498692
A9UF02_HUMAN	29221	Staphylococcal bacteraemia	1577	9	0.33619039371995285	0.29106498481136833	1.3282692320451674
A9UF02_HUMAN	29221	Staphylococcal infection	16605	75	0.6350783486632674	0.4690732958139618	1.049972855337176
A9UF02_HUMAN	29221	Staphylococcal sepsis	2642	16	0.17729347384782684	0.17592278057112645	1.4099863964436474
A9UF02_HUMAN	29221	Stent placement	4120	23	0.2311560048733262	0.21726944181032226	1.2991267752685411
A9UF02_HUMAN	29221	Stomatitis	18604	82	0.8223252264236456	0.568127556509582	1.0245086610483598
A9UF02_HUMAN	29221	Streptococcal infection	2277	11	0.6299708286527517	0.4659275096179373	1.1233690160986098
A9UF02_HUMAN	29221	Streptococcal sepsis	556	3	0.5194401262181606	0.4050703144853717	1.2554105821861496
A9UF02_HUMAN	29221	Subarachnoid haemorrhage	3859	24	0.08277997426351824	0.09367835812699969	1.4482233156692377
A9UF02_HUMAN	29221	Sudden death	6668	45	0.0046892044510636315	0.007354871980944768	1.57234346659129
A9UF02_HUMAN	29221	Superinfection	740	4	0.5666682781667732	0.43054909785237455	1.2576848767190958
A9UF02_HUMAN	29221	Supraventricular extrasystoles	2026	10	0.6084431708877289	0.45343516808216033	1.1478869906563176
A9UF02_HUMAN	29221	Supraventricular tachycardia	4711	25	0.26593447631242306	0.2425848373096589	1.23460316536659
A9UF02_HUMAN	29221	Swelling	28461	207	2.7760759221257635e-12	1.0678180032358467e-11	1.6954307915508218
A9UF02_HUMAN	29221	Swelling face	26244	195	1.880931897784753e-12	7.30866237509812e-12	1.7323403346263255
A9UF02_HUMAN	29221	Systemic inflammatory response syndrome	1606	7	0.8488894192684898	0.5823708720393875	1.0130694941927425
A9UF02_HUMAN	29221	Tachypnoea	4788	22	0.7394846144228848	0.5245779485823452	1.068214095878913
A9UF02_HUMAN	29221	Tenosynovitis	884	4	0.795284373186955	0.5537748734518937	1.0518818968923347
A9UF02_HUMAN	29221	Testicular disorder	567	4	0.3160640456418885	0.2769811664840157	1.644149323739351
A9UF02_HUMAN	29221	Testicular swelling	556	4	0.31032756021507724	0.2729073713383903	1.6769131689587944
A9UF02_HUMAN	29221	Thoracic vertebral fracture	1047	6	0.47011754482523355	0.37536587077332906	1.333798370699214
A9UF02_HUMAN	29221	Throat cancer	794	4	0.5898097110041255	0.44389277800213095	1.17171654337374
A9UF02_HUMAN	29221	Thrombophlebitis	1931	10	0.48607194352307304	0.38531806876061736	1.2046539162744072
A9UF02_HUMAN	29221	Thrombotic thrombocytopenic purpura	2090	9	0.867898273975288	0.5929504376123215	1.0008294838283627
A9UF02_HUMAN	29221	Thyroid neoplasm	2329	19	0.009883830064190005	0.014446999776615788	1.903405337233748
A9UF02_HUMAN	29221	Thyroidectomy	650	5	0.21203635548736577	0.20246615927085854	1.7939071109791753
A9UF02_HUMAN	29221	Tongue dry	599	3	0.7472971176278462	0.528617441592329	1.164835657632451
A9UF02_HUMAN	29221	Tongue paralysis	634	4	0.3568980872843262	0.304364457639234	1.4692953480400865
A9UF02_HUMAN	29221	Tonsillar disorder	632	4	0.35555479218962444	0.30345989658135286	1.473974632587985
A9UF02_HUMAN	29221	Transaminases increased	8123	68	6.205615473832156e-07	1.6334140347392205e-06	1.9535882281203385
A9UF02_HUMAN	29221	Transfusion	3615	17	0.7015348573533424	0.5062900999085916	1.0933958572477296
A9UF02_HUMAN	29221	Transfusion reaction	522	3	0.4950368441820141	0.390739619447266	1.33765327928505
A9UF02_HUMAN	29221	Transplant failure	1024	6	0.46466819054581904	0.372106552207443	1.3639333044183513
A9UF02_HUMAN	29221	Traumatic lung injury	1110	5	0.816958639637251	0.5650330192817397	1.0471222503000617
A9UF02_HUMAN	29221	Tricuspid valve incompetence	4561	34	0.0029381967643696983	0.004803345902861678	1.7380332645802214
A9UF02_HUMAN	29221	Ulcer	6653	32	0.5108856900304874	0.3999033622252201	1.1184486564147464
A9UF02_HUMAN	29221	Ulcerative keratitis	1080	8	0.1525063548860928	0.15537093332034163	1.7269702784799523
A9UF02_HUMAN	29221	Underweight	525	3	0.4971335088364227	0.3920120406075095	1.329965616760423
A9UF02_HUMAN	29221	Upper airway obstruction	670	3	0.7671795075034593	0.5398725495321316	1.0408426565951137
A9UF02_HUMAN	29221	Upper respiratory tract inflammation	633	5	0.20544444364763612	0.19752629823262602	1.8424682907349812
A9UF02_HUMAN	29221	Ureteric obstruction	666	3	0.7659508765535559	0.5391651427602202	1.0471222503000615
A9UF02_HUMAN	29221	Urinary tract disorder	1661	8	0.7049517277956887	0.5082495851790106	1.1199710456929879
A9UF02_HUMAN	29221	Urinary tract infection bacterial	696	3	0.7753927713986942	0.5444031609785459	1.0017922827546044
A9UF02_HUMAN	29221	Urinary tract obstruction	708	5	0.23942989100821926	0.2231849182433047	1.6459033948528707
A9UF02_HUMAN	29221	Urine analysis abnormal	1242	9	0.12245546046197664	0.13011961450848183	1.6891534110679827
A9UF02_HUMAN	29221	Urine odour abnormal	2323	13	0.33740070574014414	0.29192162000385735	1.3023299675809856
A9UF02_HUMAN	29221	VIIth nerve paralysis	3678	17	0.7050510369421311	0.5083045550003519	1.074580249761631
A9UF02_HUMAN	29221	Varicella	1066	6	0.4752234748390278	0.37845486758465796	1.3098906640546053
A9UF02_HUMAN	29221	Vasculitis	4978	23	0.6651164435817065	0.48652171725637305	1.0741720279061984
A9UF02_HUMAN	29221	Vasodilatation	1125	6	0.49416994769394573	0.3902081875442639	1.240825830114282
A9UF02_HUMAN	29221	Venoocclusive disease	783	6	0.15928613032582553	0.16110167360550215	1.7869808286974023
A9UF02_HUMAN	29221	Venoocclusive liver disease	1374	9	0.20892602083922357	0.20018431132483297	1.5258067075800898
A9UF02_HUMAN	29221	Venous thrombosis	2102	13	0.18006994338372032	0.1781586426644621	1.440106378703723
A9UF02_HUMAN	29221	Ventricular dysfunction	1689	10	0.2655919801960279	0.24233783191282415	1.3782847964044884
A9UF02_HUMAN	29221	Ventricular extrasystoles	5825	27	0.6878248498323446	0.49873784650852204	1.077643750869346
A9UF02_HUMAN	29221	Ventricular hypertrophy	2536	15	0.22091704124639477	0.2093122542129664	1.3769179927587085
A9UF02_HUMAN	29221	Visual acuity reduced	23129	101	0.8799217768638736	0.5998117901500319	1.01497376015927
A9UF02_HUMAN	29221	Vitamin B12 decreased	869	7	0.10841604606647687	0.11735716280927991	1.8792321591812011
A9UF02_HUMAN	29221	Vitamin B12 deficiency	1447	11	0.06640615197231362	0.07771395307973264	1.7726700490803968
A9UF02_HUMAN	29221	Vocal cord paralysis	754	6	0.14877598340035972	0.1522842765308294	1.8562621709864728
A9UF02_HUMAN	29221	Vomiting	181294	1194	1.509185787665952e-44	1.5341029924504258e-43	1.5341939848732842
A9UF02_HUMAN	29221	Weight fluctuation	2389	12	0.5306648141947911	0.4110174101233251	1.1682659687823993
A9UF02_HUMAN	29221	Weight gain poor	806	4	0.7828665426915521	0.5469682417668311	1.1541846250190206
A9UF02_HUMAN	29221	Wound secretion	2010	9	0.8635758625602359	0.5904502270362583	1.0408426565951139
KCNK1_HUMAN	1423	Abasia	22742	6	0.4882352872707886	0.3866653202635048	1.259211478955117
KCNK1_HUMAN	1423	Abdominal discomfort	52559	16	0.12913610529134717	0.1361596872200788	1.4530033019570532
KCNK1_HUMAN	1423	Abdominal distension	38929	15	0.03173363394575542	0.040863858179571895	1.8392758509484723
KCNK1_HUMAN	1423	Abdominal pain	91875	21	0.6455903044777704	0.4749929140269958	1.090894382926518
KCNK1_HUMAN	1423	Abnormal dreams	16717	4	0.7840724387372717	0.5475730468475706	1.1420025204141901
KCNK1_HUMAN	1423	Abnormal faeces	2564	1	0.4157312724427122	0.34170810212121255	1.8617136289194656
KCNK1_HUMAN	1423	Abnormal sensation in eye	2403	1	0.3956754756628989	0.32868435508785915	1.9864995965531183
KCNK1_HUMAN	1423	Accident	3949	1	0.562974530286943	0.42827855796619985	1.2086048710538475
KCNK1_HUMAN	1423	Activated partial thromboplastin time prolonged	3499	1	0.5197331553545269	0.40524957028698533	1.364085772132816
KCNK1_HUMAN	1423	Acute respiratory distress syndrome	7488	3	0.20858073389237547	0.1999213078831478	1.9124537198078517
KCNK1_HUMAN	1423	Adverse drug reaction	19971	7	0.20908564500055962	0.20030601838632392	1.6730617219216655
KCNK1_HUMAN	1423	Adverse event	38127	8	0.859910727151143	0.5885001711122836	1.0014054998128157
KCNK1_HUMAN	1423	Adverse reaction	3858	1	0.5545559234185866	0.42332498748639835	1.2371200494997643
KCNK1_HUMAN	1423	Affective disorder	2534	1	0.41204525798971736	0.3392158228174244	1.8837631389343032
KCNK1_HUMAN	1423	Ageusia	9593	3	0.45980634638525353	0.3692162018281564	1.4926711254183285
KCNK1_HUMAN	1423	Akathisia	5944	2	0.3537816894581549	0.3022671256083839	1.6060491521105993
KCNK1_HUMAN	1423	Alanine aminotransferase increased	32156	9	0.33296059352188356	0.2887858970201154	1.3358679901168171
KCNK1_HUMAN	1423	Alopecia	48806	18	0.02561227467407794	0.033834944045359645	1.7604389718080395
KCNK1_HUMAN	1423	Amnesia	30172	8	0.4252964653184115	0.34828360033054867	1.2655011353721233
KCNK1_HUMAN	1423	Anaemia	81132	18	0.8063178711936759	0.5593408059186831	1.0588590940721778
KCNK1_HUMAN	1423	Anaphylactic reaction	17883	4	0.7929869271196943	0.5524933636606549	1.0675254837341217
KCNK1_HUMAN	1423	Anorectal discomfort	3403	1	0.5099687524261753	0.3993570247890469	1.4025784923340947
KCNK1_HUMAN	1423	Anuria	4352	1	0.5983865194123765	0.44796188196184655	1.0966610045783936
KCNK1_HUMAN	1423	Anxiety	113430	41	0.0011962379797066098	0.0020943315795074755	1.7253389064877915
KCNK1_HUMAN	1423	Aortic aneurysm	2655	1	0.42677149263908326	0.3492988075886752	1.7978794389301396
KCNK1_HUMAN	1423	Apathy	5898	2	0.3503214277238862	0.29996431797907275	1.6185793863366995
KCNK1_HUMAN	1423	Aphthous stomatitis	2972	1	0.4636275895859889	0.3715406129503636	1.6060491521105993
KCNK1_HUMAN	1423	Appendicitis	3209	1	0.4896268375455148	0.3875436402943146	1.4873977652495605
KCNK1_HUMAN	1423	Application site burn	2501	1	0.4079638019544741	0.33651002680148373	1.908628812368236
KCNK1_HUMAN	1423	Application site swelling	2610	1	0.421338341710184	0.34554801555093584	1.8288892414413915
KCNK1_HUMAN	1423	Arthritis	28086	11	0.0566798981796196	0.06771821958640734	1.8695384626937308
KCNK1_HUMAN	1423	Ascites	12351	4	0.3362595182622048	0.2911136431021416	1.5458239348572416
KCNK1_HUMAN	1423	Aspartate aminotransferase increased	29202	8	0.4125688628533269	0.3395589153371902	1.3075486828582832
KCNK1_HUMAN	1423	Aspiration	4683	1	0.625316353540256	0.4631652708063437	1.019131147142373
KCNK1_HUMAN	1423	Atrioventricular block	3451	1	0.5148755073148041	0.4023879534769374	1.383064356788577
KCNK1_HUMAN	1423	Back pain	89475	27	0.06179423116894634	0.0729693706693253	1.440305482904659
KCNK1_HUMAN	1423	Bipolar disorder	5690	2	0.3345987386999629	0.2899390461475396	1.6777679433616703
KCNK1_HUMAN	1423	Blindness transient	2945	1	0.4605829030720008	0.3696836874722116	1.6207785431116137
KCNK1_HUMAN	1423	Blood amylase increased	3075	1	0.475085601846243	0.3783736044331893	1.5522355338063079
KCNK1_HUMAN	1423	Blood calcium decreased	4800	2	0.2663562356993753	0.24289481644640773	1.988983756115294
KCNK1_HUMAN	1423	Blood cholesterol increased	22099	6	0.4783388153200737	0.38044300834329	1.2958598735130376
KCNK1_HUMAN	1423	Blood creatine phosphokinase increased	16978	5	0.41491497201708244	0.3411472359874284	1.4056360192425
KCNK1_HUMAN	1423	Blood creatinine increased	29840	7	0.6863148206237963	0.49787577073017586	1.1195992430008423
KCNK1_HUMAN	1423	Blood culture positive	2591	1	0.419028926891823	0.3439751485575373	1.8423058034442434
KCNK1_HUMAN	1423	Blood glucose decreased	23515	6	0.5016820642130236	0.3948025336640319	1.217807315731147
KCNK1_HUMAN	1423	Blood glucose increased	86545	27	0.0434530168025936	0.05375744058948085	1.4890825589456063
KCNK1_HUMAN	1423	Blood potassium decreased	12821	5	0.20280415308578592	0.19556218607843728	1.8615683641232015
KCNK1_HUMAN	1423	Blood pressure decreased	27640	9	0.20306978348706634	0.19576651281571594	1.5542017400124972
KCNK1_HUMAN	1423	Blood pressure diastolic decreased	2498	1	0.40759136127203177	0.3362886996548484	1.9109219186706408
KCNK1_HUMAN	1423	Blood pressure increased	56300	21	0.012069504986947565	0.017307950811023237	1.7804689608794115
KCNK1_HUMAN	1423	Blood test abnormal	3465	1	0.516297375693945	0.40321009207798325	1.3774746047692235
KCNK1_HUMAN	1423	Blood testosterone decreased	4421	1	0.6041554154278155	0.4509386940380235	1.079541183466197
KCNK1_HUMAN	1423	Blood thyroid stimulating hormone increased	2804	1	0.44440004102432085	0.36042325257089225	1.702308965722651
KCNK1_HUMAN	1423	Blood urine present	7984	3	0.2355790957146017	0.22041032998859825	1.7935993099563676
KCNK1_HUMAN	1423	Body temperature increased	9141	3	0.4474744776172789	0.3623714018181615	1.5665042780435292
KCNK1_HUMAN	1423	Brain injury	3502	1	0.5200351322428468	0.40543482258003727	1.3629168897231048
KCNK1_HUMAN	1423	Breast mass	3177	1	0.48619131540550925	0.38539009477058	1.50238414071807
KCNK1_HUMAN	1423	Breast pain	4732	1	0.6291465836515195	0.46546290124958645	1.008575783327117
KCNK1_HUMAN	1423	Bronchospasm	6567	2	0.3999261345223246	0.33139848911404685	1.4536396133802256
KCNK1_HUMAN	1423	Caesarean section	8370	3	0.2569867113146646	0.23610705738279	1.710854080645604
KCNK1_HUMAN	1423	Cardiac disorder	43611	14	0.13027710253519675	0.1371707080360572	1.5322615875608014
KCNK1_HUMAN	1423	Cardiac failure	31046	8	0.550246251194608	0.42078007871514955	1.2298658498409925
KCNK1_HUMAN	1423	Cardio-respiratory arrest	21867	8	0.14996901842104082	0.15328010343024043	1.7463093575810753
KCNK1_HUMAN	1423	Cardiogenic shock	4750	1	0.6305437671616282	0.46626553184299263	1.0047530071426807
KCNK1_HUMAN	1423	Cardiovascular disorder	19544	7	0.13704105575570116	0.1429368415643212	1.7096281013688963
KCNK1_HUMAN	1423	Cerebrovascular accident	91721	22	0.4899171778106734	0.3877165356659295	1.144773494588305
KCNK1_HUMAN	1423	Chest discomfort	37547	14	0.04506249567346904	0.05551027123252884	1.7798206493722395
KCNK1_HUMAN	1423	Chills	47592	11	0.7486160861976657	0.5293251382989277	1.103114527650249
KCNK1_HUMAN	1423	Circulatory collapse	8680	3	0.4363749812248023	0.3553280788821598	1.649731023713469
KCNK1_HUMAN	1423	Coagulopathy	8213	2	0.6920581191230174	0.5011294973297712	1.1622389552845185
KCNK1_HUMAN	1423	Coeliac disease	3910	1	0.5593861881697916	0.4261365181317966	1.22066309309813
KCNK1_HUMAN	1423	Cold sweat	7816	3	0.22636186437385838	0.2135692371400857	1.8321664012238281
KCNK1_HUMAN	1423	Constipation	68109	19	0.22783060741036668	0.21469661260130193	1.331471120391999
KCNK1_HUMAN	1423	Coordination abnormal	8544	3	0.26672272841080685	0.24314853668816833	1.676000010860762
KCNK1_HUMAN	1423	Coronary artery bypass	4749	1	0.630466281911028	0.46622455811316466	1.0049646231930478
KCNK1_HUMAN	1423	Cough	87425	31	0.0062609962660256716	0.009565778277888265	1.6925502089221032
KCNK1_HUMAN	1423	Decreased appetite	86284	29	0.016878458087169698	0.023375009447572603	1.6042616531992013
KCNK1_HUMAN	1423	Decreased interest	2512	1	0.40932742014243884	0.3373948362194359	1.900267634775225
KCNK1_HUMAN	1423	Deep vein thrombosis	38143	10	0.4731893519681428	0.3772026822852436	1.2512973096584559
KCNK1_HUMAN	1423	Deformity	4753	1	0.6307761080111964	0.4664145451345663	1.004118693375545
KCNK1_HUMAN	1423	Dehydration	59381	16	0.31540518491759384	0.2764993864950858	1.2860296891220322
KCNK1_HUMAN	1423	Dementia Alzheimer's type	3683	1	0.537908096715193	0.41435211678125866	1.2959185309398669
KCNK1_HUMAN	1423	Depressed level of consciousness	17751	7	0.107361122829702	0.11639570365453586	1.8823830149032987
KCNK1_HUMAN	1423	Depressed mood	18183	5	0.4402256848657189	0.35774608006520586	1.3124579246673425
KCNK1_HUMAN	1423	Dermatitis allergic	3746	1	0.5439717400865791	0.4171887713343569	1.2741180322885421
KCNK1_HUMAN	1423	Device failure	6439	2	0.3905648155504111	0.3258348302613398	1.4825452946778281
KCNK1_HUMAN	1423	Device malfunction	14323	5	0.23428680235061639	0.2194363759472913	1.666284408059991
KCNK1_HUMAN	1423	Diabetes mellitus	37330	9	0.5898437108626351	0.44391276388544315	1.150669818018952
KCNK1_HUMAN	1423	Diabetic neuropathy	2905	1	0.45604048613856385	0.3670135378066373	1.6431033164327102
KCNK1_HUMAN	1423	Discomfort	14904	4	0.5614856922218154	0.4274063746241246	1.2809589344753263
KCNK1_HUMAN	1423	Disease progression	40262	12	0.22189521591509917	0.2100800053413594	1.4225804812682503
KCNK1_HUMAN	1423	Disease recurrence	9187	3	0.4486681811907217	0.36314770461864077	1.558658111145663
KCNK1_HUMAN	1423	Diverticulitis	9249	3	0.45030006812353107	0.3641383384080437	1.5482063695394515
KCNK1_HUMAN	1423	Diverticulum	4210	1	0.5862485669294897	0.4417485250752829	1.1336593088430957
KCNK1_HUMAN	1423	Drooling	2480	1	0.4053517830477472	0.33481559109742093	1.9247971080760753
KCNK1_HUMAN	1423	Drug dependence	15364	4	0.5701747927221472	0.4325868032493275	1.2425968830522371
KCNK1_HUMAN	1423	Drug dispensing error	11084	4	0.3029268230438792	0.26793658140652893	1.7225891808377582
KCNK1_HUMAN	1423	Drug ineffective	376367	93	0.10448696933425494	0.11393032757406404	1.1793432415623053
KCNK1_HUMAN	1423	Drug intolerance	17455	5	0.4242847609128596	0.34758393009282224	1.3672126163096245
KCNK1_HUMAN	1423	Drug level decreased	2547	1	0.41364537215018327	0.34029628315858124	1.874144552600389
KCNK1_HUMAN	1423	Drug screen positive	4714	1	0.6277441324503532	0.4646243645377472	1.0124277595842543
KCNK1_HUMAN	1423	Drug toxicity	15104	5	0.25502028479582467	0.2348378004364321	1.5800953807936255
KCNK1_HUMAN	1423	Dry mouth	31743	13	0.028409147386999945	0.03710199442572111	1.9549459943891483
KCNK1_HUMAN	1423	Dry skin	18694	4	0.8005031162682283	0.5567716660455582	1.0212032168904421
KCNK1_HUMAN	1423	Dyspepsia	38576	12	0.15701880670903173	0.1591809219215584	1.48477503295942
KCNK1_HUMAN	1423	Dyspnoea	211378	68	0.0007312389246031642	0.001327668636427438	1.535501860312338
KCNK1_HUMAN	1423	Ear pain	7276	2	0.667974815037669	0.4880677576307137	1.3119527167777263
KCNK1_HUMAN	1423	Emotional distress	27112	8	0.29040300945225783	0.25930231175895996	1.4083742712280372
KCNK1_HUMAN	1423	Emphysema	4991	2	0.28108014594207203	0.2526865175419019	1.9128370538867872
KCNK1_HUMAN	1423	Encephalopathy	9290	3	0.4513934477483952	0.36479582258103455	1.5413713893358212
KCNK1_HUMAN	1423	Epilepsy	10719	3	0.4952545380395109	0.3908695779388536	1.3358264364279366
KCNK1_HUMAN	1423	Eructation	6434	2	0.3901977965004093	0.3256457511051654	1.4836977708086414
KCNK1_HUMAN	1423	Erythema multiforme	4365	1	0.5994797880018594	0.44847000520904623	1.0933941409075596
KCNK1_HUMAN	1423	Euphoric mood	4863	2	0.27121425676413713	0.24627594614700282	1.9632059374287554
KCNK1_HUMAN	1423	Eye disorder	11497	3	0.5224370335406806	0.40692968259503753	1.2454076990396528
KCNK1_HUMAN	1423	Eye swelling	13396	4	0.36975349562125953	0.3132170487122352	1.4252007260814188
KCNK1_HUMAN	1423	Faeces discoloured	9398	2	0.7251508969332584	0.5196328982967623	1.0156602875522756
KCNK1_HUMAN	1423	Failure to thrive	2898	1	0.45524163602825846	0.3665906511407306	1.6470735350088335
KCNK1_HUMAN	1423	Fatigue	241583	70	0.007908997716111575	0.011821591157989359	1.3829899101267482
KCNK1_HUMAN	1423	Fear	16870	7	0.09676678323830805	0.10715829963418652	1.980727285562719
KCNK1_HUMAN	1423	Feeling abnormal	97802	34	0.005060427089560288	0.007887140861795428	1.6593716661003606
KCNK1_HUMAN	1423	Fibromyalgia	8227	2	0.6924373039747853	0.501352860295137	1.1602606762116938
KCNK1_HUMAN	1423	Fistula	4271	1	0.5915070411427187	0.444904038489225	1.1174641758596229
KCNK1_HUMAN	1423	Flank pain	4032	1	0.5705143261161462	0.43277640459487404	1.183719184053731
KCNK1_HUMAN	1423	Flatulence	21703	6	0.4728980736781152	0.37701942336559574	1.3195110930323795
KCNK1_HUMAN	1423	Fluid retention	18723	4	0.8007882639548937	0.5569225322166795	1.0196211402148811
KCNK1_HUMAN	1423	Flushing	54320	16	0.1769463350322833	0.17567272666838474	1.4058845111728315
KCNK1_HUMAN	1423	Foot fracture	7744	3	0.22243315735696073	0.21051046687735345	1.8492076079010165
KCNK1_HUMAN	1423	Formication	3416	1	0.5113025403678325	0.4001622991068748	1.397239247707347
KCNK1_HUMAN	1423	Frustration	3738	1	0.5432061938381193	0.41679003446015844	1.2768456063474953
KCNK1_HUMAN	1423	Gallbladder disorder	11418	4	0.3107757473397684	0.27322874839223216	1.6721822431822642
KCNK1_HUMAN	1423	Gangrene	2534	1	0.41204525798971736	0.3392158228174244	1.8837631389343032
KCNK1_HUMAN	1423	Gastric disorder	13927	4	0.5457847968057832	0.41819770641255033	1.3708459472586627
KCNK1_HUMAN	1423	Gastritis	12548	5	0.19847590107894342	0.19245706156454515	1.9020856377742925
KCNK1_HUMAN	1423	Gastrointestinal haemorrhage	40935	12	0.22774292401845336	0.21462595463664896	1.3991854060319888
KCNK1_HUMAN	1423	Gastrointestinal pain	3399	1	0.5095576283284877	0.399109724324215	1.404229555891875
KCNK1_HUMAN	1423	Gastrooesophageal reflux disease	32104	10	0.23899646922621823	0.22285754368081517	1.4867489346671
KCNK1_HUMAN	1423	General physical health deterioration	36763	13	0.06716096866424036	0.07849264372776345	1.6879030313460592
KCNK1_HUMAN	1423	General symptom	4897	2	0.2738356276783404	0.2481732269818296	1.9495697776999348
KCNK1_HUMAN	1423	Gingival bleeding	5125	2	0.29139620378847897	0.2600121089495721	1.8628038379545542
KCNK1_HUMAN	1423	Glomerular filtration rate decreased	2906	1	0.4561545095948828	0.36707528666090633	1.6425377042755904
KCNK1_HUMAN	1423	Glycosylated haemoglobin increased	7587	3	0.21391517734350166	0.20386869507649663	1.887488936281879
KCNK1_HUMAN	1423	Grand mal convulsion	12447	3	0.7492622768566177	0.5296811830330009	1.1503307692672589
KCNK1_HUMAN	1423	Granulocytopenia	3359	1	0.5054273566755417	0.3967056362490687	1.420956530947168
KCNK1_HUMAN	1423	Haemodynamic instability	2660	1	0.42737202718127887	0.3496881232227085	1.7944986953443365
KCNK1_HUMAN	1423	Haemolysis	3349	1	0.5043893611386807	0.3961154209232604	1.4252007260814188
KCNK1_HUMAN	1423	Head discomfort	4455	1	0.606967537374341	0.452549385409734	1.0713004110733253
KCNK1_HUMAN	1423	Headache	228199	59	0.10500601997343269	0.11435385711321325	1.233991188850332
KCNK1_HUMAN	1423	Heart rate increased	40011	15	0.03437791887441849	0.04385487310652521	1.7895184634415655
KCNK1_HUMAN	1423	Hepatic encephalopathy	4116	1	0.5780126261751024	0.4369529103326494	1.159555779081553
KCNK1_HUMAN	1423	Hepatic enzyme increased	22749	9	0.062031043476380596	0.07322137496843596	1.8884849726598643
KCNK1_HUMAN	1423	Hepatic function abnormal	14160	3	0.7734110887189591	0.5433766526074765	1.0111405024201292
KCNK1_HUMAN	1423	Hepatic steatosis	8330	2	0.6952395812231918	0.50298126961042	1.1459106702499016
KCNK1_HUMAN	1423	Hepatitis	10691	3	0.4943091060172147	0.39029445248181865	1.33932598173295
KCNK1_HUMAN	1423	Herpes zoster	19579	5	0.6142179439186775	0.4568018393160629	1.2188546109432385
KCNK1_HUMAN	1423	Hiccups	3250	1	0.4939950649872878	0.39011172550745965	1.4686278950201879
KCNK1_HUMAN	1423	Hospitalisation	29762	8	0.41961816938840824	0.34436682819317516	1.2829393105923481
KCNK1_HUMAN	1423	Hunger	4205	1	0.5858145661791482	0.44153242657924413	1.1350076191533278
KCNK1_HUMAN	1423	Hydrocephalus	2410	1	0.3965616045382116	0.32922485852605554	1.9807272855627192
KCNK1_HUMAN	1423	Hypercalcaemia	4656	1	0.6231889447264025	0.4619123192192583	1.0250423267283761
KCNK1_HUMAN	1423	Hyperhidrosis	54579	22	0.00421373152856238	0.006680446500071912	1.924126778969756
KCNK1_HUMAN	1423	Hypersensitivity	60520	14	0.6707127414257013	0.4895257286655296	1.1040559354921538
KCNK1_HUMAN	1423	Hypertensive crisis	4270	1	0.5914213815450003	0.44486463181179786	1.1177259383744649
KCNK1_HUMAN	1423	Hyperthyroidism	4583	1	0.6173764383243349	0.4585923677390437	1.041373206224485
KCNK1_HUMAN	1423	Hyperventilation	2879	1	0.4530674398687002	0.3654797064429051	1.6579471962892949
KCNK1_HUMAN	1423	Hypoacusis	7855	2	0.6825250436305971	0.49572107814818606	1.2152227253076762
KCNK1_HUMAN	1423	Hypoaesthesia	62269	15	0.5756668553796878	0.43556766683557124	1.149702516525988
KCNK1_HUMAN	1423	Hypoaesthesia oral	6602	2	0.40247411740129324	0.33302816852773137	1.445930918460785
KCNK1_HUMAN	1423	Hypoalbuminaemia	3124	1	0.4804503198699321	0.3818098211498174	1.5278808936665353
KCNK1_HUMAN	1423	Hypoglycaemia	22404	7	0.2461184655927438	0.22818886406000544	1.4913159894827044
KCNK1_HUMAN	1423	Hyponatraemia	22684	6	0.487291887814068	0.38608195913886734	1.2624319686711147
KCNK1_HUMAN	1423	Hypophagia	12533	5	0.1982518559899682	0.1923051109339201	1.9043630391605164
KCNK1_HUMAN	1423	Hypophosphataemia	2474	1	0.40460338163807835	0.33435897273161097	1.9294670565792924
KCNK1_HUMAN	1423	Hypotonia	5031	2	0.28416120263325495	0.2548452463661008	1.8976226012808073
KCNK1_HUMAN	1423	Hypoxia	13091	5	0.20753776064269097	0.19913552098738452	1.8231591131440432
KCNK1_HUMAN	1423	Immunodeficiency	2426	1	0.39858216661521934	0.33053067514551193	1.9676585694517896
KCNK1_HUMAN	1423	Impaired healing	13368	4	0.3688015546889539	0.3125658054443888	1.4281867796829066
KCNK1_HUMAN	1423	Inappropriate schedule of drug administration	41688	11	0.39457109829643466	0.32803744186798944	1.2593826892561002
KCNK1_HUMAN	1423	Incorrect dose administered	58553	13	0.7735666048122933	0.5434677976854517	1.0596248104196733
KCNK1_HUMAN	1423	Incorrect drug administration duration	19947	5	0.6187457990230716	0.45934633484805826	1.196362458860844
KCNK1_HUMAN	1423	Increased upper airway secretion	3835	1	0.552402599027522	0.4220492488921089	1.2445414791133516
KCNK1_HUMAN	1423	Influenza like illness	39739	9	0.7274164084975628	0.5209712996012495	1.0808997804753413
KCNK1_HUMAN	1423	Insomnia	110134	42	0.00030751493912178885	0.0005923509616373361	1.8203504823117467
KCNK1_HUMAN	1423	Intentional overdose	18664	5	0.4517010922183302	0.36494746841525105	1.2786248006111232
KCNK1_HUMAN	1423	International normalised ratio decreased	3164	1	0.4847890442755453	0.3845209674011281	1.508558972785517
KCNK1_HUMAN	1423	Intervertebral disc degeneration	4815	2	0.2675129732947803	0.243683768026047	1.9827849702558031
KCNK1_HUMAN	1423	Intervertebral disc protrusion	10144	4	0.1660564520140701	0.16667918080265595	1.8822769352743944
KCNK1_HUMAN	1423	Irritable bowel syndrome	6941	2	0.6602195409888102	0.4838369519683228	1.3752909730279839
KCNK1_HUMAN	1423	Jaw disorder	3398	1	0.5094547901454378	0.3990523004816421	1.4046429293260494
KCNK1_HUMAN	1423	Joint dislocation	4035	1	0.5707843967257297	0.43291225543800194	1.1828388772733243
KCNK1_HUMAN	1423	Joint injury	8475	3	0.26285643099907974	0.24036865408459057	1.689650152592277
KCNK1_HUMAN	1423	Joint range of motion decreased	3727	1	0.5421514431385935	0.416305780641761	1.2806151451746082
KCNK1_HUMAN	1423	Knee operation	2722	1	0.43476654601113823	0.35429641124251293	1.7536097136790116
KCNK1_HUMAN	1423	Large intestine perforation	2853	1	0.45007814525842454	0.36400737002141825	1.6730617219216655
KCNK1_HUMAN	1423	Leukocytosis	7970	2	0.6855505074712194	0.4974412734479269	1.1976837427009512
KCNK1_HUMAN	1423	Ligament sprain	3055	1	0.47288005018794543	0.3770121534656492	1.5624007959792372
KCNK1_HUMAN	1423	Lip swelling	13050	3	0.7571101110126414	0.5341366201759792	1.0971653324719681
KCNK1_HUMAN	1423	Liver function test abnormal	19990	7	0.2092849591013507	0.20043407767489013	1.6714709611391747
KCNK1_HUMAN	1423	Localised infection	8145	2	0.6902226673492066	0.5000726060714653	1.171944499796289
KCNK1_HUMAN	1423	Loss of consciousness	57314	19	0.05682591794669881	0.06786781527457068	1.5823347340516838
KCNK1_HUMAN	1423	Lower limb fracture	6528	2	0.3970809410763959	0.32956516506669026	1.462326702703215
KCNK1_HUMAN	1423	Lung infection	9369	2	0.724327703204918	0.5191457604349909	1.0188047466468646
KCNK1_HUMAN	1423	Lymphadenopathy	14517	5	0.23918987112393966	0.22300650100910036	1.6440091065740732
KCNK1_HUMAN	1423	Lymphopenia	4107	1	0.5772155377746458	0.4364898981873945	1.1620974259426669
KCNK1_HUMAN	1423	Macular oedema	2794	1	0.44323406441049945	0.3596781723502425	1.7084038778806268
KCNK1_HUMAN	1423	Major depression	2993	1	0.4659837898619793	0.3728852623712125	1.5947767483023365
KCNK1_HUMAN	1423	Medication error	31017	11	0.10904283060087874	0.11792231355553842	1.6928108217805098
KCNK1_HUMAN	1423	Medication residue	2642	1	0.42520718335400054	0.34822173754283076	1.806729280924116
KCNK1_HUMAN	1423	Memory impairment	47272	16	0.07559278204380085	0.08674628220600403	1.6155652720232234
KCNK1_HUMAN	1423	Mental impairment	10199	3	0.47817394679103936	0.38033664833935615	1.403954108744779
KCNK1_HUMAN	1423	Metabolic disorder	2796	1	0.44346746771897133	0.3598260988473498	1.7071814064116602
KCNK1_HUMAN	1423	Metastases to liver	6157	2	0.3697158024501929	0.31319297016836173	1.5504701968872756
KCNK1_HUMAN	1423	Metastases to lung	3780	1	0.5472110946509285	0.4190061822831515	1.262654678729979
KCNK1_HUMAN	1423	Miosis	2735	1	0.4363048652765689	0.35528268574955113	1.7452714085298429
KCNK1_HUMAN	1423	Mobility decreased	24226	6	0.6513856100378306	0.47859336932934865	1.182057480822607
KCNK1_HUMAN	1423	Mood altered	11463	3	0.5212180073815978	0.4061811593079116	1.2491026258954423
KCNK1_HUMAN	1423	Mood swings	15616	6	0.15129949211875457	0.1543621505853508	1.8340443424422512
KCNK1_HUMAN	1423	Movement disorder	15190	5	0.2574572483223131	0.23642858457477575	1.5711465363584425
KCNK1_HUMAN	1423	Multiple drug overdose intentional	3613	1	0.531076156320877	0.41116396464608496	1.32103323115188
KCNK1_HUMAN	1423	Muscle disorder	4145	1	0.5805708166891244	0.4384559225779004	1.1514411271526521
KCNK1_HUMAN	1423	Muscle rigidity	4888	2	0.2731417737176678	0.24766639584835065	1.953160880442321
[truncated: 507,205 more rows]
