# Supplementary material for: In Silico Profiling of Clinical Phenotypes for Human Targets Using Adverse Event Data
Source: High Throughput. 2018 Nov 23;7(4):37. doi: 10.3390/ht7040037 (PMC6306940; doi:10.3390/ht7040037)
Supplement: Supplementary file 1 [file high-throughput-07-00037-s001.zip › high-throughput-385126-suppl-final/Supplementary_File_5.xlsx]

## Sheet: Benchmark
Benchmarking
Original data by Whitebread et al.		Target-phenotype AEs
Targets	Possible ADRs *	Uniprot Id (accession)		Adverse reaction (MedDRA level 4)	Num AEs
Adenosine, Ad1	Bradycardia, atrioventricular block. Renal vasoconstriction.	ADA 1 (P00813)		Bradycardia	107
				Atrioventricular block ***	34
		ADORA1 (P30542)		Bradycardia	799
				Atrioventricular block	108
Adenosine, Ad2a	Hypotension, coronary vasodilation. Facilitation of platelet aggregation.	ADORA2A (P29274)		Hypotension	536
Adenosine, Ad3	Enhanced mediator release could exacerbate asthma and allergic conditions.	N/A
Adrenergic alpha, Al1a	Hypertension and positive inotropic effect. Orthostatic hypotension.	ADA1A (P35348)		Hypertension	14933
				Hypotension	16188
				Orthostatic hypotension	2691
Adrenergic alpha, Al1b	Orthostatic hypotension.	ADA1B (P35368)		Hypotension	13959
				Orthostatic hypotension	2407
Adrenergic alpha, Al2a	Might inhibit insulin secretion, resulting in hyperglycemia. Hypertension exacerbates heart failure.	ADA2A (P08913)		Hyperglycaemia	3803
				Hypertension	12104
				Cardiac failure	3883
Adrenergic alpha, Al2b	Hypertension, cardiac ischemia (block), vasoconstriction of arteries. Peripherally exacerbates heart failure, centrally reduces blood pressure.	ADA2B (P18089)		Hypertension	10121
				Myocardial ischaemia	1045
				vasoconstriction	63
				Cardiac failure	3472
				Blood pressure decreased	3771
Adrenergic alpha, Al2c	Hypertension, cardiac ischemia. Increased muscular, skeletal blood flow.	ADA2C (P18825)		Hypertension	10310
				Myocardial ischaemia	1061
Adrenergic beta, Beta1	Positive inotropic and chronotropic effects, ventricular fibrillation. Facilitation of bronchospasm, impairs cardiovascular performance.	ADRB1 (P08588)		Heart rate increased	8402
				ventricular fibrillation	1956
				bronchospasm	1579
Adrenergic beta, Beta2	Facilitates cardiac arrest, bronchodilation. Increased bronchospasm, impairs exercise stress cardiovascular performance.	ADRB2 (P07550)		Cardiac arrest	8835
				Bronchospasm	1898
Angiotensin II, AT1	Increases blood pressure, cell proliferation and migration, tubular Na+resorption.	AGTR1 (P30556)		Blood pressure increased	8450
				Hypertension	8939
Bradykinin, B1	Enhances nociception, inflammation, vasodilation and cough.	N/A
Bradykinin, B2	Enhances nociception, inflammation, vasodilatation and cough.	BKRB2 (P30411)		Blood pressure decreased ***	3
				Inflammation ***	2
				Cough ***	10
Calcitonin gene-related peptide, CGRP	Hypocalcaemia and hypophosphatemia.	CALCR (P30988)		Hypophosphataemia ***	4
				Hypocalcaemia ***	11
		CALCA (P06881)		N/A
		CALCB (P10092)
		CALRL (Q16602)
Ca channel type L, benzothiazepine	Hypotension	CAC1C (Q13936)		Hypotension	8347
		CAC1D (Q01668)		Hypotension	8339
		CAC1F (O60840)		Hypotension	3200
		CAC1S (Q13698)		Hypotension	8273
Ca channel type L, phenylalkylamie	Hypotension	see above
Dopamine, D1	Treatment of Parkinson’s disease; induces dyskinesia, extreme arousal, locomotor activation, vasodilatation and hypotension. Schizophrenia, neurodegeneration, coordination disorders.	DRD1 (P21728)		Dyskinesia	5338
				Blood pressure decreased	1997
				Hypotension	6260
				Schizophrenia **	2595
				Neurodegenerative disorder *** ; **	49
				Coordination abnormal **	861
Endothelin, Eta	Might cause vasoconstriction, positive inotropy, cell proliferation (e.g. smooth muscle and mesangial cells) and aldosterone secretion.	EDNRA (P25101)		Vasoconstriction ***	35
Endothelin Etb	Causes initial vasodepression, vasoconstriction, bronchoconstriction and cell proliferation. Vasodilatation, platelet aggregation.	EDNRB (P24530)		Hypotension	2446
				Blood pressure increased	239
				Blood pressure decreased	539
Ghrelin, GHS	Energy homeostasis, GH release, effects on glucose homeostasis, cardiovascular effects.	N/A
Histamine, H3	Impairs memory, causes sedation, vasodilatation, bronchodilation, negative chronotropy and reduces gastrointestinal motility.	HRH3 (Q9Y5N1)		Memory impairment	369
				Sedation	307
				Vasodilatation ***	12
				Heart rate decreased	80
				Gastrointestinal hypomotility ***	14
Muscarinic, M1(h)	Vagal effects, blood pressure changes, secretory functions. Decreases gastric acid secretion.	ACM1 (P11229)		Hypotension	10977
				Hypertension	11765
Muscarinic, M2	Vagal effects, blood pressure changes. Tachycardia.	ACM2 (P08172)		Hypotension	10089
				Hypertension	10793
				Tachycardia	7476
Muscarinic, M3	Vagal effects, blood pressure changes, salivation. Reduces incontinence, bronchoconstriction and gastrointestinal motility. Interferes with ocular accommodation, dry mouth.	ACM3 (P20309)		Hypotension	9505
				Hypertension	10820
				Salivary gland disorders NEC (Level 3) *	1469
				Incontinence	1011
				Bronchostenosis ***	25
				Gastrointestinal hypomotility	198
				Accommodation disorder	98
				Dry mouth	8739
Muscarinic, M4	Vagal effects, blood pressure changes. Facilitation of D1 CNS stimulation.	ACM4 (P08173)		Hypotension	6761
				Hypertension	8037
NE transporter	Inhibitor increases adrenergic hyperactivity and facilitate a1 adrenergic activation.	N/A
Nicotinic acetylcholine	Stimulates autonomic cardiovascular, gastrointestinal functions. Palpitation, orthostatic hypotonia, nausea, sweating, muscle tremor, bronchial secretion. Effects on muscular and vegetative ganglionic functions.	N/A
NPY, Y1	Antidepressant, causes vasoconstriction (venous), inhibits gut motility, gastric emptying, acid secretion, pancreatic exocrine secretions. Anxiogenic, inhibits ischemic brain injury.	N/A
Potassium Ch (hERG)	QT interval (electrocardiogram) prolongation.	KCNH2 (Q12809)		Electrocardiogram QT prolonged	2509
Potassium Ch [ATP]	Hypotension. Hypoglycemia.	KCNJ8 (Q15842)		Blood glucose decreased	1622
				Hypotension	591
		KCNJ11 (Q14654)		Blood glucose decreased	3115
				Hypotension	2093
		ABCC8 (Q09428)		Blood glucose decreased	4990
				Hypoglycaemia	5440
				Hypotension	2109
		ABCC9 (O60706)		Blood glucose decreased	1619
				Hypotension	559
Serotonin, 5-HT2b	Cardiac valvulopathy.	5HT2B (P41595)		Cardiac valve disorders NEC (level 3)	353
Serotonin, 5-HT4	Facilitates gastrointestinal transit, mechanical intestinal allodynia. Useful in treatment of irritable bowel syndrome, cardiac arrhythmias.	5HT4R (Q13639)		Allodynia *** ; ****	19
				Odynophagia ****	130
Sodium Ch (site 2)	Antagonist causes cardiac arrhythmia.	N/A
Thromboxane a2 receptor, TP	Facilitates vascular, uterine and bronchial constriction, gastrointestinal spasm, allergic inflammation and platelet aggregation. Useful in treatment of chronic productive cough, thrombosis, atherosclerosis.	N/A
Vasopressin V1a	Vasopressor	V1AR (P37288)		Blood pressure decreased	112
Vasopressin V1b	Vasopressor, anxiogenic.	V1BR (P47901)		Blood pressure decreased	58
				Stress	110
				Anxiety	197
Notes
*	Example of an effect that may be better captured in higher MedDRA level (exact term 'salivation' was not reported as reaction in AEs)
**	Highlights cases where the term may associate more with a condition rather than a reaction
***	Highlights cases with < 50 AEs
****	Highlights cases when other terms might also be relevant (e.g., abdominal pain with PRR = 2.96 and pain with PRR = 2.59)
Comments
Bold indicates terms selected for further comparison.
Underlined terms highlight original phrases mapped to AE reactions.
N/A reflects cases either not considered or cases when respective proteins had no AEs.
Sometimes more that one terms have been matched to an effect phrase (e.g., 'stress' and 'anxiety' for' anxiogenic', or 'hypertension' and 'hypotension' for 'blood pressure changes').

## Sheet: Comparison T2R via AEs direct
Target	Reaction (L5)	Target with reaction AEs	Target AEs (all)	Reaction AEs (all)	a	b	c	d	PRR	CI-PRR (-)	CI-PRR (+)	Fisher's exact test (p-value)	Significant at 0.05
ABCC8 (Q09428)	Blood glucose decreased	4990	117970	23515	4990	112980	18525	6654875	15.2376	14.7766	15.7131	0	1
ABCC8 (Q09428)	Hypoglycaemia	5440	117970	22404	5440	112530	16964	6656436	18.1404	17.6044	18.6927	0	1
ABCC8 (Q09428)	Hypotension	2109	117970	75948	2109	115861	73839	6599561	1.61572	1.54787	1.68654	0	1
ABCC9 (O60706)	Blood glucose decreased	1619	29659	23515	1619	28040	21896	6739815	16.8571	16.0482	17.7067	0	1
ABCC9 (O60706)	Hypotension	559	29659	75948	559	29100	75389	6686322	1.69046	1.55672	1.83569	0	1
ACM1 (P11229)	Hypertension	11765	688165	83411	11765	676400	71646	6031559	1.45635	1.42846	1.48478	0	1
ACM1 (P11229)	Hypotension	10977	688165	75948	10977	677188	64971	6038234	1.49841	1.46863	1.52879	0	1
ACM2 (P08172)	Hypertension	10793	605195	83411	10793	594402	72618	6113557	1.51923	1.48908	1.55	0	1
ACM2 (P08172)	Hypotension	10089	605195	75948	10089	595106	65859	6120316	1.56588	1.53367	1.59878	0	1
ACM2 (P08172)	Tachycardia	7476	605195	35142	7476	597719	27666	6158509	2.76217	2.69286	2.83326	0	1
ACM3 (P20309)	Dry mouth	8739	600411	31743	8739	591672	23004	6167955	3.91713	3.82238	4.01423	0	1
ACM3 (P20309)	Hypertension	10820	600411	83411	10820	589591	72591	6118368	1.53693	1.50646	1.56801	0	1
ACM3 (P20309)	Hypotension	9505	600411	75948	9505	590906	66443	6124516	1.47507	1.44394	1.50687	0	1
ACM4 (P08173)	Hypertension	8037	410033	83411	8037	401996	75374	6305963	1.65945	1.62208	1.69769	0	1
ACM4 (P08173)	Hypotension	6761	410033	75948	6761	403272	69187	6312150	1.52083	1.48361	1.55897	0	1
ADA 1 (P00813)	Bradycardia	107	10605	21589	107	10498	21482	6759283	3.18476	2.63632	3.8473	0	1
ADA1A (P35348)	Hypertension	14933	754263	83411	14933	739330	68478	5968629	1.74543	1.71508	1.77631	0	1
ADA1A (P35348)	Hypotension	16188	754263	75948	16188	738075	59760	5977347	2.16815	2.13117	2.20576	0	1
ADA1A (P35348)	Orthostatic hypotension	2691	754263	6684	2691	751572	3993	6033114	5.39412	5.13707	5.66402	0	1
ADA1B (P35368)	Hypotension	13959	625014	75948	13959	611055	61989	6104367	2.22166	2.18165	2.26242	0	1
ADA1B (P35368)	Orthostatic hypotension	2407	625014	6684	2407	622607	4277	6162079	5.55234	5.28221	5.83628	0	1
ADA2A (P08913)	Cardiac failure	3883	606636	31046	3883	602753	27163	6157571	1.45741	1.40937	1.5071	0	1
ADA2A (P08913)	Hyperglycaemia	3803	606636	16074	3803	602833	12271	6172463	3.15965	3.04707	3.27639	0	1
ADA2A (P08913)	Hypertension	12104	606636	83411	12104	594532	71307	6113427	1.73057	1.69785	1.76392	0	1
ADA2B (P18089)	Blood pressure decreased	3771	503985	27640	3771	500214	23869	6263516	1.97095	1.90463	2.03957	0	1
ADA2B (P18089)	Cardiac failure	3472	503985	31046	3472	500513	27574	6259811	1.57084	1.51654	1.62709	0	1
ADA2B (P18089)	Hypertension	10121	503985	83411	10121	493864	73290	6214095	1.72279	1.68768	1.75862	0	1
ADA2B (P18089)	Myocardial ischaemia	1045	503985	8172	1045	502940	7127	6280258	1.8292	1.71433	1.95178	0	1
ADA2C (P18825)	Hypertension	10310	520946	83411	10310	510636	73101	6197323	1.69762	1.66329	1.73265	0	1
ADA2C (P18825)	Myocardial ischaemia	1061	520946	8172	1061	519885	7111	6263313	1.79593	1.68384	1.91547	0	1
ADORA1 (P30542)	Bradycardia	799	126537	21589	799	125738	20790	6644043	2.02425	1.88657	2.17198	0	1
ADORA2A (P29274)	Hypotension	536	13742	75948	536	13206	75412	6702216	3.50552	3.22536	3.81001	0	1
ADRB1 (P08588)	Heart rate increased	8402	723678	40011	8402	715276	31609	6036083	2.22869	2.17598	2.28268	0	1
ADRB2 (P07550)	Cardiac arrest	8835	772815	40759	8835	763980	31924	5986631	2.15529	2.10535	2.20641	0	1
AGTR1 (P30556)	Blood pressure increased	8450	237701	56300	8450	229251	47850	6505819	4.86887	4.75929	4.98097	0	1
AGTR1 (P30556)	Hypertension	8939	237701	83411	8939	228762	74472	6479197	3.3094	3.23883	3.38151	0	1
CAC1C (Q13936)	Hypotension	8347	276288	75948	8347	267941	67601	6447481	2.91162	2.84708	2.97763	0	1
CAC1D (Q01668)	Hypotension	8339	276145	75948	8339	267806	67609	6447616	2.91006	2.84552	2.97606	0	1
CAC1F (O60840)	Hypotension	3200	82222	75948	3200	79022	72748	6636400	3.58929	3.46678	3.71612	0	1
CAC1S (Q13698)	Hypotension	8273	274215	75948	8273	265942	67675	6449480	2.90537	2.84071	2.9715	0	1
DRD1 (P21728)	Blood pressure decreased	1997	373263	27640	1997	371266	25643	6392464	1.33906	1.27961	1.40128	0	1
DRD1 (P21728)	Dyskinesia	5338	373263	17986	5338	367925	12648	6405459	7.25686	7.02958	7.49149	0	1
DRD1 (P21728)	Hypotension	6260	373263	75948	6260	367003	69688	6348419	1.54457	1.50546	1.5847	0	1
EDNRB (P24530)	Blood pressure decreased	539	102658	27640	539	102119	27101	6661611	1.29585	1.19021	1.41086	0	1
EDNRB (P24530)	Blood pressure increased	239	102658	56300	239	102419	56061	6632651	0.277771	0.244666	0.315355	0	1
EDNRB (P24530)	Hypotension	2446	102658	75948	2446	100212	73502	6615210	2.16824	2.08362	2.2563	0	1
KCNH2 (Q12809)	Electrocardiogram QT prolonged	2509	250820	12063	2509	248311	9554	6530996	6.84806	6.55467	7.15458	0	1
KCNJ11 (Q14654)	Blood glucose decreased	3115	89221	23515	3115	86106	20400	6681749	11.4703	11.0523	11.9041	0	1
KCNJ11 (Q14654)	Hypotension	2093	89221	75948	2093	87128	73855	6628294	2.12881	2.03933	2.22221	0	1
KCNJ8 (Q15842)	Blood glucose decreased	1622	30008	23515	1622	28386	21893	6739469	16.6933	15.8927	17.5342	0	1
KCNJ8 (Q15842)	Hypotension	591	30008	75948	591	29417	75357	6686005	1.7671	1.63101	1.91455	0	1
V1AR (P37288)	Blood pressure decreased	112	7072	27640	112	6960	27528	6756770	3.90307	3.24675	4.69206	0	1
V1BR (P47901)	Blood pressure decreased	58	4669	27640	58	4611	27582	6759119	3.05659	2.36617	3.94847	0	1

## Sheet: Comparison T2R via Drugs
Target	Reaction (L5)	Num drugs w target	Num drugs w reaction	Num drugs w both	a	b	c	d	PRR	CI-PRR (-)	CI-PRR (+)	Fisher's exact test (p-value)	Significant at 0.05	Max PRR*	Avg PRR*	Min PRR*
ABCC8 (Q09428)	Blood glucose decreased	12	1276	9	9	3	1267	1309	1.52486	1.09734	2.11895	0.08746	0	16.924	8.264	0.694
ABCC8 (Q09428)	Hypoglycaemia	12	1480	11	11	1	1469	1107	1.60744	1.35092	1.91268	0.01709	1	25.517	14.031	4.48
ABCC8 (Q09428)	Hypotension	12	1847	10	10	2	1837	739	1.16857	0.906254	1.50682	0.52708	0	4.405	2.006	0.881
ABCC9 (O60706)	Blood glucose decreased	2	1276	1	1	1	1275	1311	1.01412	0.253482	4.05722	1	0	16.924	16.924	16.924
ABCC9 (O60706)	Hypotension	2	1847	1	1	1	1846	740	0.700433	0.175135	2.80131	0.49074	0	1.697	1.697	1.697
ACM1 (P11229)	Hypertension	80	1822	70	70	10	1752	756	1.25257	1.14852	1.36604	0.00042	1	20.356	2.386	0.492
ACM1 (P11229)	Hypotension	80	1847	68	68	12	1779	729	1.19831	1.08927	1.31827	0.00541	1	8.475	1.963	0.34
ACM2 (P08172)	Hypertension	69	1822	57	57	12	1765	754	1.17899	1.05488	1.3177	0.02311	1	20.356	2.218	0.535
ACM2 (P08172)	Hypotension	69	1847	59	59	10	1788	731	1.20466	1.08969	1.33175	0.00681	1	8.475	2.3	0.34
ACM2 (P08172)	Tachycardia	69	1754	60	60	9	1694	825	1.29305	1.17544	1.42243	0.00035	1	16.105	4.138	0.689
ACM3 (P20309)	Dry mouth	65	1416	50	50	15	1366	1157	1.42077	1.23774	1.63087	0.00022	1	23.324	4.08	0.348
ACM3 (P20309)	Hypertension	65	1822	55	55	10	1767	756	1.20818	1.08584	1.34429	0.01249	1	13.57	2.127	0.585
ACM3 (P20309)	Hypotension	65	1847	57	57	8	1790	733	1.23602	1.12464	1.35844	0.0021	1	8.475	2.43	0.34
ACM4 (P08173)	Hypertension	43	1822	38	38	5	1784	761	1.26069	1.12784	1.40918	0.0069	1	5.869	1.972	0.585
ACM4 (P08173)	Hypotension	43	1847	39	39	4	1808	737	1.27669	1.15649	1.40939	0.00335	1	7.452	2.124	0.34
ADA 1 (P00813)	Bradycardia	6	1542	4	4	2	1538	1044	1.1192	0.635033	1.97252	1	0	12.322	4.643	1.215
ADA1A (P35348)	Hypertension	85	1822	76	76	9	1746	757	1.28177	1.1861	1.38516	3e-05	1	11.362	2.386	0.387
ADA1A (P35348)	Hypotension	85	1847	76	76	9	1771	732	1.26368	1.16959	1.36534	7e-05	1	10.163	2.753	0.286
ADA1A (P35348)	Orthostatic hypotension	85	1239	66	66	19	1173	1330	1.65687	1.46738	1.87083	0	1	47.286	7.195	0.275
ADA1B (P35368)	Hypotension	61	1847	56	56	5	1791	736	1.29529	1.19685	1.40183	0.00014	1	9.642	2.661	0.153
ADA1B (P35368)	Orthostatic hypotension	61	1239	51	51	10	1188	1339	1.7784	1.57954	2.0023	0	1	47.286	6.918	0.275
ADA2A (P08913)	Cardiac failure	70	1631	60	60	10	1571	947	1.37383	1.24268	1.51882	3e-05	1	13.747	2.457	0.106
ADA2A (P08913)	Hyperglycaemia	70	1486	59	59	11	1427	1091	1.48726	1.33665	1.65483	0	1	17.605	3.387	0.194
ADA2A (P08913)	Hypertension	70	1822	63	63	7	1759	759	1.28835	1.18668	1.39872	0.0001	1	11.362	2.451	0.387
ADA2B (P18089)	Blood pressure decreased	52	1652	48	48	4	1604	932	1.45943	1.342	1.58713	0	1	11.281	2.945	0.27
ADA2B (P18089)	Cardiac failure	52	1631	47	47	5	1584	952	1.44707	1.31771	1.58913	1e-05	1	13.747	2.613	0.106
ADA2B (P18089)	Hypertension	52	1822	48	48	4	1774	762	1.31957	1.21507	1.43306	0.00017	1	11.362	2.373	0.387
ADA2B (P18089)	Myocardial ischaemia	52	1265	42	42	10	1223	1313	1.67482	1.45803	1.92385	0	1	20.525	3.002	0.183
ADA2C (P18825)	Hypertension	49	1822	44	44	5	1778	761	1.28229	1.16287	1.41398	0.00225	1	11.362	2.241	0.387
ADA2C (P18825)	Myocardial ischaemia	49	1265	36	36	13	1229	1310	1.51781	1.27671	1.80445	0.00048	1	20.525	2.857	0.183
ADORA1 (P30542)	Bradycardia	8	1542	5	5	3	1537	1043	1.04912	0.612776	1.79618	1	0	12.322	5.902	1.486
ADORA2A (P29274)	Hypotension	10	1847	7	7	3	1840	738	0.980761	0.653168	1.47266	1	0	5.896	2.813	0.533
ADRB1 (P08588)	Heart rate increased	53	1664	43	43	10	1621	914	1.26878	1.11068	1.44939	0.00889	1	10.157	2.242	0.272
ADRB2 (P07550)	Cardiac arrest	62	1688	51	51	11	1637	889	1.2693	1.12675	1.42987	0.00422	1	10.095	2.917	0.21
AGTR1 (P30556)	Blood pressure increased	8	1711	8	8	0	1703	877	1.51497	1.4736	1.55751	0.05755	0	6.257	4.411	3.37
AGTR1 (P30556)	Hypertension	8	1822	8	8	0	1814	766	1.42227	1.38705	1.45839	0.11469	0	4.005	3.212	2.67
CAC1C (Q13936)	Hypotension	17	1847	17	17	0	1830	741	1.40492	1.37078	1.4399	0.00524	1	11.178	3.624	0.255
CAC1D (Q01668)	Hypotension	15	1847	15	15	0	1832	741	1.40448	1.37038	1.43942	0.00866	1	8.944	3.139	0.255
CAC1F (O60840)	Hypotension	7	1847	7	7	0	1840	741	1.40272	1.36879	1.43748	0.2027	0	8.944	4.122	1.921
CAC1S (Q13698)	Hypotension	14	1847	14	14	0	1833	741	1.40426	1.37018	1.43918	0.01455	1	8.944	3.108	0.255
DRD1 (P21728)	Blood pressure decreased	51	1652	46	46	5	1606	931	1.42483	1.29543	1.56716	2e-05	1	13.368	2.856	0.27
DRD1 (P21728)	Dyskinesia	51	1392	46	46	5	1346	1191	1.70006	1.54196	1.87436	0	1	31.468	8.283	1.128
DRD1 (P21728)	Hypotension	51	1847	47	47	4	1800	737	1.2989	1.19443	1.41251	0.00044	1	11.332	2.457	0.366
EDNRB (P24530)	Blood pressure decreased	4	1652	4	4	0	1648	936	1.56796	1.52305	1.61419	0.30354	0	3.11	1.957	1.116
EDNRB (P24530)	Blood pressure increased	4	1711	3	3	1	1708	876	1.13466	0.643944	1.99933	1	0	0.384	0.325	0.211
EDNRB (P24530)	Hypotension	4	1847	4	4	0	1843	741	1.40206	1.3682	1.43676	0.5834	0	3.89	2.547	1.943
KCNH2 (Q12809)	Electrocardiogram QT prolonged	29	1350	28	28	1	1322	1237	1.86896	1.72815	2.02124	0	1	482.804	40.664	0.81
KCNJ11 (Q14654)	Blood glucose decreased	8	1276	6	6	2	1270	1310	1.52362	1.01928	2.27752	0.1733	0	16.924	8.304	1.092
KCNJ11 (Q14654)	Hypotension	8	1847	8	8	0	1839	741	1.40294	1.36899	1.43772	0.11472	0	13.499	5.602	0.733
KCNJ8 (Q15842)	Blood glucose decreased	7	1276	3	3	4	1273	1308	0.868926	0.369057	2.04584	1	0	16.924	8.998	4.621
KCNJ8 (Q15842)	Hypotension	7	1847	6	6	1	1841	740	1.20168	0.887182	1.62765	0.68083	0	13.499	6.067	1.697
V1AR (P37288)	Blood pressure decreased	6	1652	5	5	1	1647	935	1.30642	0.912346	1.8707	0.4276	0	9.648	5.692	1.165
V1BR (P47901)	Blood pressure decreased	3	1652	3	3	0	1649	936	1.56762	1.52274	1.61381	0.55765	0	9.648	4.525	1.165
(*) Among PRRs of drugs with reaction of column B that target respective protein of column A.
